# Supplementary material for: CsdA-LaeB hub governs Aspergillus fumigatus virulence via FqC biosynthesis
Source: Research Square preprint supplement (doi:10.21203/rs.3.rs-6615529/v1), 2025-06-12
Supplement: Supplementary file 1 [file 060e5c1b4bfb25ed872e751f.xlsx]

## Sheet: ΔcsdA
Supplementary Table 4 - RNA-seq data for regulated BGCs in A. fumigatus.
Negative regulation (4)
No.	Gene ID	Cluster Number	Type	A. fumigatus WT_1_fpkm	A. fumigatus WT_2_fpkm	A. fumigatus WT_3_fpkm	A. fumigatus WT_mean	ΔcsdA_1_fpkm	ΔcsdA_2_fpkm	ΔcsdA_3_fpkm	ΔcsdA_mean	Log2foldchange	p value
1	AFUB_033640	Cluster 5 (Fumigaclavine A-C)	Indole	0	0	0	0	0	1.01688	0	0.338961	0	0
	AFUB_033650			0.720117	0	0	0.240039	0.384696	0.315584	1.61159	0.770622	1.69379	0.365909
	AFUB_033660			0.932934	0	0	0.310978	1.99354	0.408849	1.67029	1.35756	2.11849	0.216761
	AFUB_033670			0	0	0	0	0	0.350959	0.358447	0.236469	1.67932	0.648425
	AFUB_033680			0.310622	0	0	0.103541	4.64628	1.90578	0.83419	2.46208	4.4406	0.00390352
	AFUB_033690			0.518099	0	0	0.1727	9.96392	8.17387	4.63792	7.5919	5.33399	9.33e-05
	AFUB_033700			0	0	0	0	0.278905	0.686395	0.70104	0.555447	3.52296	0.0901062
	AFUB_033710			0	0	0	0	0.585981	0	0	0.195327	1.91845	0.633571
	AFUB_033720			11.2033	11.9995	3.15366	8.78547	20.8777	13.7016	13.9939	16.191	0.893154	0.0706637
	AFUB_033730			2.40251	1.25739	0	1.21997	6.41727	1.05288	3.7637	3.74462	1.62471	0.100889
	AFUB_033740			1.51064	2.71068	0	1.40711	4.15031	2.83725	2.12504	3.03753	1.12207	0.191375
	AFUB_033750			1.19772	0	0	0.399241	0	1.04978	0.714786	0.588189	0.592708	0.773154
	AFUB_033760			0.608708	0	0	0.202903	2.60144	5.33521	1.63471	3.19045	3.85976	0.015474
2	AFUB_034020	Cluster 13	NRPS	9.32578	9.21925	7.83901	8.79468	3.59808	7.49271	8.58016	6.55698	-0.404396	0.365376
	AFUB_034010			0	0	0.380337	0.126779	0	0	0	0	0	0
	AFUB_034000			0	0	0	0	0	0	0	0	0	0
	AFUB_033990			2.10998	1.71778	1.65535	1.8277	0.500969	2.87677	2.51842	1.96539	0.13217	0.862975
	AFUB_033980			1.18552	1.24092	0	0.808812	0	0.519542	2.12251	0.880684	0.157642	0.92936
	AFUB_033970			0.478808	3.00709	1.4489	1.64493	0.255786	0.419666	0.642929	0.43946	-1.87915	0.0827229
	AFUB_033960			0	0	0	0	0	0.695761	0	0.23192	0	0
	AFUB_033950			0	0	0	0	0	0.101083	0	0.0336945	1.66789	0.68019
	AFUB_033940			0	0	0	0	0	0	0	0	0	0
	AFUB_033930			0.382372	0.400239	0.964235	0.582282	2.45122	1.50814	0.513438	1.49093	1.3514	0.156183
	AFUB_033920			0	1.89446	0	0.631488	0	0.528779	0	0.17626	-1.62091	0.574831
	AFUB_033910			0.803207	0.840739	2.43056	1.35817	28.3195	9.85593	12.2233	16.7996	3.62519	6.6e-05
	AFUB_033900			66.7398	84.0669	85.5759	78.7942	175.245	128.89	124.551	142.895	0.865485	0.00464147
	AFUB_033890			4.30927	6.39006	3.62226	4.77386	6.52253	6.29498	6.75076	6.52276	0.461636	0.37247
3	AFUB_100680	Cluster 14 (Endocrocin)	PKS	0	0	0.403898	0.134633	0	1.05288	0.716895	0.589924	2.04171	0.369375
	AFUB_100690			0	0	0	0	0.127555	0.313919	0.213744	0.218406	3.30497	0.128719
	AFUB_100710			6.42566	4.20369	0	3.54312	8.58168	4.22397	1.43803	4.74789	0.426549	0.699451
	AFUB_100720			1.21198	2.53723	1.83377	1.86099	4.20847	3.98354	8.13707	5.44303	1.56186	0.0170001
	AFUB_100730			0.381941	2.53723	0.693468	1.20421	2.87715	2.73648	2.0941	2.56924	1.32656	0.0479807
	AFUB_100740			0	0.899271	0.433295	0.444189	2.75374	0.376504	1.53815	1.55613	1.8093	0.21497
	AFUB_100750			4.47501	0	0	1.49167	2.39061	2.61484	12.6855	5.89698	1.99684	0.132278
	AFUB_100760			0	0.420369	0	0.140123	10.298	5.27996	6.47114	7.34971	5.65221	2.32e-05
	AFUB_100770			41.8957	49.1158	59.1636	50.0583	46.553	30.8454	22.5025	33.3003	-0.589374	0.204346
10	AFUB_075680	Cluster 21 (Gliotoxin)	NRPS	0.811207	1.13215	0.409128	0.784162	1.87788	1.42201	1.33132	1.54374	0.977207	0.0476325
	AFUB_075690			0.665402	0.696494	0	0.453965	0.710933	0.583212	0.578275	0.62414	0.459287	0.502659
	AFUB_075700			0	1.26861	2.44502	1.23788	1.29491	1.36228	1.5946	1.41726	0.195238	0.813447
	AFUB_075710			0.0635496	0	0	0.0211832	0.0678981	0.1671	0.113777	0.116258	2.45634	0.0559513
	AFUB_075720			0	0.291158	0.84173	0.377629	1.48316	0.487603	0.649003	0.873256	1.20943	0.277952
	AFUB_075730			0	0	0	0	0	0.275406	0	0.0918018	0	0.373901
	AFUB_075740			0	0	0.329138	0.109713	0.348631	0.285998	0.2921	0.30891	1.49345	0.148578
	AFUB_075750			0	0	0	0	0	0	0	0	0	0
	AFUB_075760			1.02576	3.75791	5.17335	3.31901	7.67163	8.7658	7.11635	7.85126	1.24217	0.0258333
	AFUB_075770			3.35758	3.51447	0.483821	2.45195	1.02495	5.46529	3.86439	3.45154	0.49331	0.572814
	AFUB_075780			76.8038	75.7657	70.783	74.4508	158.215	118.168	125.636	134.006	0.847939	0.00871456
	AFUB_075790			58.9324	39.4922	43.0893	47.1713	88.2842	75.7032	82.9009	82.2961	0.802915	0.00738081
5	AFUB_078030	Cluster 22 (Fumiquizoline)	NRPS	10.9101	10.8887	3.58299	8.46061	10.5723	9.78488	7.72236	9.35985	0.157389	0.74377
	AFUB_078040			1.87069	0.489526	0.353802	0.904673	4.37215	2.97182	3.6632	3.66906	2.02829	0.00131362
	AFUB_078050			1.29587	2.71284	0.326781	1.44516	3.80748	4.25925	4.06012	4.04229	1.50194	0.0522628
	AFUB_078060			0.272574	0.570622	0	0.281065	8.73677	8.1228	10.4921	9.11724	5.04544	1.24e-07
	AFUB_078070			3.1911	2.22681	2.42277	2.61356	1.57642	1.14284	1.04435	1.25454	-1.05417	0.0028023
6	AFUB_084240	Cluster 29 (Sartorypyrones)	PKS	0.369869	0.232291	0.447699	0.349953	0.790356	0.713203	0.794639	0.766066	1.13561	0.11518
	AFUB_084230			0	0	0	0	0	0.200972	0	0.0669905	0	0
	AFUB_084220			0	0	0	0	0	0	0	0	0	0
	AFUB_084210			0	0	0	0	0	0	1.02112	0.340374	1.68541	0.676895
	AFUB_084200			1.1375	0	0	0.379168	0.405113	0	1.35769	0.587602	0.646254	0.758765
	AFUB_084190			0	0	0	0	0	0	0	0	0	0
	AFUB_084170			1.04417	3.27888	1.57986	1.96764	2.78905	5.03357	7.47776	5.10012	1.39548	0.0946808
	AFUB_084160			13.4992	19.2325	31.0153	21.249	6.41018	7.23054	5.37077	6.33716	-1.73896	0.000163486
Positive regulation (18)
No.	Gene ID	Cluster Number	Type	A. fumigatus WT_1_fpkm	A. fumigatus WT_2_fpkm	A. fumigatus WT_3_fpkm	A. fumigatus WT_mean	ΔcsdA_1_fpkm	ΔcsdA_2_fpkm	ΔcsdA_3_fpkm	ΔcsdA_mean	Log2foldchange	p value
1	AFUB_009720	Cluster 1 (Fumiganins)	NRPS	26.9941	36.934	52.318	38.7487	37.0816	27.3778	32.6223	32.3606	-0.254387	0.436717
	AFUB_009730			12.699	10.7776	14.3672	12.6146	12.2845	13.9882	10.5998	12.2908	-0.0281404	0.927562
	AFUB_009740			11.5998	13.6918	12.1984	12.4967	20.5679	15.7913	17.2328	17.864	0.522433	0.0985165
	AFUB_009750			151.64	208.007	283.094	214.247	732.991	372.467	369.467	491.642	1.20544	0.00124076
	AFUB_009760			1770.82	1766.88	1157.61	1565.1	956.923	1331.78	1240.43	1176.38	-0.401258	0.137602
	AFUB_009770			245.628	289.244	327.633	287.502	490.341	420.662	435.424	448.809	0.650196	0.00934309
	AFUB_009780			44.1255	42.8603	41.1141	42.7	49.9416	39.6584	32.1358	40.5786	-0.0648182	0.808368
	AFUB_009790			246.517	214.396	158.682	206.532	134.671	135.759	153.845	141.425	-0.535224	0.0326131
	AFUB_009800			89.5204	90.2137	107.113	95.6157	32.1519	28.8994	27.3842	29.4785	-1.68883	1.69e-15
	AFUB_009810			204.311	112.382	46.8292	121.174	22.0677	68.2538	71.0426	53.788	-1.15668	0.0305104
	AFUB_009820			3.20244	3.67647	6.14792	4.34227	1.87634	2.35415	1.84952	2.02667	-1.08997	0.0145756
	AFUB_009830			39.6724	43.5618	41.1941	41.4761	66.4896	53.1809	56.7528	58.8077	0.511546	0.0497865
	AFUB_009840			13.2431	2.31032	6.67909	7.41084	9.43287	12.091	14.3248	11.9495	0.702101	0.258251
2	AFUB_018290	Cluster 3	PKS	44.3239	55.0941	67.343	55.587	61.8599	40.3059	39.6779	47.2812	-0.227504	0.468371
	AFUB_018300			185.368	201.363	230.852	205.861	256.064	217.226	240.153	237.814	0.216311	0.327455
	AFUB_018310			15.1279	11.5551	11.96	12.881	5.6789	7.8839	10.9801	8.18098	-0.637773	0.152299
	AFUB_018320			26.0941	34.4866	34.0309	31.5372	27.0348	26.1052	29.4936	27.5445	-0.18693	0.499705
	AFUB_018330			168.516	168.827	204.601	180.648	247.324	178.01	174.416	199.917	0.154795	0.542775
	AFUB_018340			85.2333	76.8609	78.7748	80.2897	62.4701	53.0516	58.8524	58.1247	-0.456756	0.0299329
	AFUB_018350			11.5381	8.7619	6.61787	8.97261	16.1951	14.0787	11.7463	14.0067	0.651842	0.0740138
	AFUB_018360			0.386729	0	0.390089	0.25894	0.826384	0.677921	1.03858	0.847628	1.70932	0.303438
	AFUB_018370			3.53657	5.38943	6.29524	5.07374	2.27826	2.00571	1.53638	1.94012	-1.38283	0.000178703
	AFUB_018380			7.29796	19.0974	12.5143	12.9699	10.9163	7.67582	11.7594	10.1172	-0.352179	0.533097
	AFUB_018390			24.444	30.4856	28.3286	27.7527	17.7815	10.9402	14.4327	14.3848	-0.94618	0.0120279
	AFUB_018400			29.6621	26.9698	32.709	29.7803	26.186	30.7353	27.1155	28.0123	-0.0785107	0.740766
	AFUB_018410			53.7538	39.7838	48.1963	47.2446	23.2049	27.1263	25.7609	25.364	-0.885578	0.00447113
	AFUB_018420			5.81751	10.1489	7.82408	7.93017	16.5749	8.49823	5.20773	10.0936	0.341278	0.708501
	AFUB_018430			22.6924	34.7654	38.9123	32.1234	26.8901	16.9965	20.8678	21.5848	-0.56898	0.0891856
	AFUB_018440			6.03298	19.5761	17.6476	14.4189	16.7591	10.5756	12.9615	13.432	-0.0999431	0.853082
	AFUB_018450			6.20535	4.33021	4.95525	5.1636	4.41997	2.49281	2.31455	3.07578	-0.751415	0.160918
	AFUB_018460			7.45835	8.58755	6.77084	7.60558	6.37496	16.3427	6.67657	9.79809	0.38565	0.546222
	AFUB_018470			19.3917	18.2681	18.2562	18.6386	7.59683	13.0306	9.83682	10.1548	-0.857614	0.0589248
	AFUB_018480			51.5411	42.1981	40.1499	44.6297	28.897	36.6766	36.0886	33.8874	-0.38432	0.200051
	AFUB_018490			18.1797	11.4175	19.5602	16.3858	40.1423	43.5534	46.6526	43.4494	1.41529	0.00169151
	AFUB_018500			122.37	136.995	100.545	119.97	125.549	170.827	193.696	163.357	0.45544	0.0959935
3	AFUB_045610	Cluster 8	NRPS-like	6.6465	5.88676	1.41821	4.65049	2.32158	1.56841	1.83071	1.9069	-1.27699	0.0315395
	AFUB_045600			1.45334	0.6085	0.293194	0.785011	0.931673	2.29288	0.780601	1.33505	0.787247	0.464301
	AFUB_045595			0	1.0296	0.496092	0.508564	5.7802	2.58642	0.880533	3.08238	2.60699	0.0481262
	AFUB_045590			0	0	0	0	1.51073	3.71797	3.7973	3.00867	3.52296	0.0901062
	AFUB_045580			0.662156	2.31032	0.222636	1.06504	7.5463	4.25602	3.75408	5.18547	2.29736	0.00214141
	AFUB_045570			0	0	0	0	2.47613	0	2.07462	1.51692	4.61406	0.0201067
	AFUB_045560			0	0	0.236888	0.0789627	2.00734	1.64672	0.420462	1.35817	3.99102	0.0121647
	AFUB_045550			4.35536	4.55887	5.1254	4.67988	1.55113	4.45362	6.49805	4.1676	-0.141376	0.861671
	AFUB_045540			0.873875	0.548826	0.352587	0.591763	0.186734	0.306374	0.312911	0.268673	-1.1145	0.357347
	AFUB_045530			0.316907	0.221144	0.319661	0.285904	0.225728	0.555526	0.0945631	0.291939	0.0497384	0.966017
4	AFUB_044980	Cluster 9 (Fusarinine C, triacetylfusarinine C)	NRPS	12.4951	11.2954	2.86446	8.885	10.9228	23.3968	26.9465	20.422	1.21779	0.0392674
	AFUB_044970			1240.88	931.537	269.332	813.917	1572.01	2109.04	2153.1	1944.72	1.27091	0.00602402
	AFUB_044960			262.682	203.186	58.8809	174.916	146.02	311.041	280.767	245.943	0.505847	0.306679
	AFUB_044950			1.06325	1.29843	1.25124	1.20431	0.757339	0.62128	0.158634	0.512418	-1.24071	0.175768
	AFUB_044940			0	0	0.478746	0.159582	1.5213	0.831994	0	0.784431	2.17602	0.331717
	AFUB_044930			1.34066	3.50827	2.70462	2.51785	2.5067	1.46883	2.7003	2.22528	-0.173978	0.817885
	AFUB_044920			500.07	491.684	494.524	495.426	140.12	114.678	128.371	127.723	-1.94688	3e-21
	AFUB_044910			285.423	306.403	259.782	283.87	43.6155	45.0884	51.3982	46.7007	-2.59357	1.13e-30
	AFUB_044900			14.2819	12.9964	20.3111	15.8631	3.1618	3.55234	3.62813	3.44742	-2.19251	6.97e-13
	AFUB_044890			198.169	281.89	255.538	245.199	71.3518	61.7144	72.1284	68.3982	-1.83494	1.14e-11
	AFUB_044880			0	0	0	0	0	0	0	0	0	0
	AFUB_044870			1.25687	1.9734	0	1.07676	0.671437	0	1.12513	0.598854	-0.84087	0.643483
	AFUB_044860			11.4712	5.20311	6.5568	7.74369	6.53658	8.37853	8.89959	7.93823	0.0498031	0.920241
	AFUB_044850			21.4021	7.97885	5.6188	11.6666	5.01185	4.11145	14.4347	7.85266	-0.554945	0.383657
	AFUB_044840			15.5277	14.6804	4.5472	11.5851	13.9144	16.2438	17.4872	15.8818	0.469678	0.354507
	AFUB_044830			6.31812	2.31808	1.90534	3.51385	2.92288	2.7974	1.92416	2.54815	-0.449305	0.37371
	AFUB_044820			4.1259	1.51154	0.728305	2.12191	1.43267	2.62179	2.77007	2.27484	0.119888	0.851851
	AFUB_044810			38.5244	18.5019	10.5148	22.5137	34.8654	41.5122	39.5579	38.6452	0.794968	0.0688004
	AFUB_044800			76.4895	36.085	20.1035	44.226	41.4373	33.5208	26.5208	33.8263	-0.372397	0.438838
	AFUB_044790			1.05023	0.824477	0	0.624902	0.561046	1.15063	1.41022	1.04063	0.760403	0.517433
	AFUB_044780			0	0	0	0	0	0	0	0	0	0
	AFUB_044770			9.15114	2.39469	0.769221	4.10502	0	2.6736	1.36532	1.34631	-1.55629	0.229763
	AFUB_044760			0	0	0	0	0.622448	0.255312	0.521518	0.466426	3.09832	0.172926
	AFUB_044750			1.67583	0.584711	1.69039	1.31698	0	0.48961	0.500056	0.329889	-1.93846	0.249067
	AFUB_044740			1.02835	0	1.03728	0.688544	1.09872	2.70398	1.84112	1.88127	1.46196	0.401713
	AFUB_044730			1.53961	1.34296	0.517661	1.13341	0.27416	0	0.229704	0.167955	-2.78586	0.0588156
	AFUB_044720			0.780126	1.63316	0.393452	0.935579	1.66702	0.683765	2.09506	1.48195	0.672749	0.548585
	AFUB_044710			3.03673	3.4965	5.81992	4.11772	2.92007	4.52478	5.16501	4.20329	0.0438002	0.939038
	AFUB_044700			0	1.44249	0	0.480829	0.736195	0	0.61682	0.451005	-0.0963408	0.969821
	AFUB_044690			3.51924	2.28037	1.52135	2.44032	0.17905	2.20324	1.8002	1.39417	-0.775864	0.309324
	AFUB_044680			169.012	143.478	101.349	137.946	26.3045	96.8131	109.005	77.3742	-0.821287	0.0833646
	AFUB_044670			153.67	96.9573	74.4887	108.372	12.77	37.4136	31.7158	27.2998	-1.97144	5.53e-06
	AFUB_044660			174.292	118.852	30.8721	108.005	105.84	137.2	130.716	124.585	0.221434	0.655472
	AFUB_044650			525.843	415.183	134.635	358.554	151.219	157.824	158.712	155.918	-1.18725	0.00577503
	AFUB_044640			705.418	541.825	140.532	462.591	381.845	427.876	456.231	421.984	-0.118049	0.803589
	AFUB_044630			3.70403	2.05259	1.09889	2.28517	0.232794	4.77429	2.5356	2.51423	0.164228	0.849993
	AFUB_044620			30.8504	19.8365	1.33365	17.3402	11.7719	35.1518	25.2496	24.0578	0.490836	0.514823
	AFUB_044610			439.642	381.721	399.729	407.03	457.603	539.117	513.259	503.327	0.316462	0.120905
5	AFUB_034600	Cluster 12	PKS	10.6971	15.0579	5.58103	10.4453	6.30567	4.52623	7.2644	6.0321	-0.782839	0.133402
	AFUB_034590			13.7601	10.8997	29.635	18.0983	5.96015	7.49707	7.32411	6.92711	-1.37638	0.00557978
	AFUB_034580			293.827	262.769	281.284	279.293	23.1959	49.3267	51.3225	41.2817	-2.74699	4.64e-17
	AFUB_034570			85.2333	137.128	111.448	111.27	118.048	105.141	73.4734	98.8874	-0.163565	0.645664
	AFUB_034560			2197.39	1693.27	476.651	1455.77	469.986	1233.58	1252.6	985.389	-0.549359	0.294778
	AFUB_034550			52.5847	51.5218	43.7902	49.2989	12.4125	14.47	20.2523	15.7116	-1.63622	1.01e-07
	AFUB_034540			643.215	631.388	463.927	579.51	83.2029	155.177	150.977	129.786	-2.14811	3.76e-12
	AFUB_034530			3.74659	5.12833	1.45352	3.44281	1.5396	0.757804	0.515981	0.937795	-1.89015	0.0253674
	AFUB_034520			1.51124	1.97732	1.79658	1.76172	0.461329	0.473062	0.289893	0.408095	-2.10555	4.35e-05
	AFUB_034510			16.4084	10.5393	8.65163	11.8664	14.3437	9.47879	7.34423	10.3889	-0.186938	0.684874
	AFUB_034500			32.2972	33.3165	27.3843	30.9993	15.0031	22.9745	27.4453	21.8077	-0.494549	0.11881
	AFUB_034490			54.7177	35.5212	28.658	39.6323	19.6747	20.0598	22.1362	20.6235	-0.929715	0.00469786
	AFUB_034480			13.2195	19.2371	7.80549	13.4207	7.92328	7.63024	3.46357	6.33903	-1.07475	0.0352232
	AFUB_034470			2.24224	0.36108	1.21785	1.27373	0.73713	0.453527	0.308802	0.49982	-1.35576	0.163988
	AFUB_034460			2.99431	1.56711	1.51016	2.02386	1.5996	0.874818	0.893483	1.12263	-0.855492	0.283179
	AFUB_034450			0.812826	0.425404	0.819888	0.686039	2.60534	0	0.363813	0.989716	0.499923	0.742996
	AFUB_034440			0.942653	0	0.475421	0.472691	0.503578	0	0	0.167859	-1.55966	0.534156
	AFUB_034430			0	0	0.855759	0.285253	0.45322	0	0	0.151073	-0.995723	0.749319
	AFUB_034420			0	0	1.17529	0.391764	0	0	0	0	-1.95726	0.627878
	AFUB_034410			0	0.417897	0	0.139299	0.42656	0	0.357393	0.261318	0.833808	0.762858
	AFUB_034400			2.45613	2.74229	2.97296	2.72379	2.2743	1.57868	1.61236	1.82178	-0.579907	0.280753
	AFUB_034390			0.898953	0.940959	0	0.613304	0	2.36375	1.60945	1.3244	1.15072	0.558327
6	AFUB_071710	Cluster 15 (Trypacidin)	PKS	1.27258	0.88803	3.42303	1.86122	0.45322	1.85899	0	0.770736	-1.24664	0.334513
	AFUB_071720			2.51374	0.877067	0	1.13027	2.68575	0	3.00034	1.89536	0.747736	0.653264
	AFUB_071730			0.949245	0	1.91498	0.954743	2.0284	0	1.69949	1.24263	0.361825	0.848202
	AFUB_071740			0	0	0.448923	0.149641	1.18877	0.585124	0.398405	0.724101	2.26014	0.167711
	AFUB_071750			0	0.637152	0.920996	0.519383	0.32518	0.266761	0.272452	0.288131	-0.84974	0.615012
	AFUB_071760			0.959307	1.00413	0.483821	0.815754	6.66217	2.10204	3.00564	3.92328	2.26454	0.0280983
	AFUB_071770			2.0567	0.5382	1.03728	1.21073	2.74679	0.901327	0.460279	1.36946	0.158392	0.899705
	AFUB_071780			0	0	2.06934	0.68978	1.46126	1.19874	0.612159	1.09072	0.653972	0.659076
	AFUB_071790			5.57844	5.51471	14.6925	8.59521	2.64896	8.69225	10.8197	7.38697	-0.206769	0.737976
	AFUB_071800			4.59746	5.70949	15.6414	8.64946	3.41346	2.86852	3.20874	3.16357	-1.44781	0.00303615
	AFUB_071810			7.18883	8.41001	14.9291	10.176	8.13254	5.93023	6.81385	6.95887	-0.546484	0.279606
	AFUB_071820			7.30702	10.296	23.5289	13.7107	6.30567	2.70958	2.01265	3.67597	-1.90934	0.00165944
7	AFUB_057720	Cluster 17	NRPS-like	50.1447	54.7166	62.1784	55.6799	10.9199	9.33139	10.1023	10.1179	-2.45347	1.11e-23
	AFUB_057730			0	0	0.530703	0.176901	0	0	0	0	0	0
	AFUB_057740			6.35388	0	1.16529	2.50639	0	1.51883	0	0.506277	-2.24741	0.211688
	AFUB_057750			0	0.9108	0	0.3036	0	0	0	0	0	0
	AFUB_057760			0	0	0.894911	0.298304	0.947911	1.55523	0	0.834381	1.48315	0.474785
	AFUB_057770			3.15679	1.10143	0	1.41941	1.87378	4.91887	2.8259	3.20618	1.19702	0.22427
	AFUB_057780			0.900942	0.314347	0	0.405096	0	0	0.268835	0.0896118	-1.98073	0.407213
	AFUB_057790			8.75755	4.07412	3.4353	5.42232	8.31715	7.24938	3.48426	6.35027	0.234383	0.718652
	AFUB_057800			0.353495	0.370013	0.713132	0.47888	0	0.309831	0	0.103277	-1.99721	0.351835
	AFUB_057810			0.952575	0	1.44128	0.797951	0.508879	0.417457	0	0.308778	-1.38738	0.474977
	AFUB_057820			1.93365	0.4048	0.780179	1.03954	0	0	1.03858	0.346193	-1.54583	0.358239
	AFUB_057830			39.4805	36.2177	14.766	30.1547	15.1666	21.3844	20.2523	18.9344	-0.656111	0.130603
	AFUB_057840			50.1795	58.5848	56.4557	55.0733	48.8017	49.62	37.4331	45.2849	-0.274013	0.360985
	AFUB_057850			661.238	694.246	475.836	610.44	272.111	172.573	194.301	212.995	-1.5095	1.39e-07
8	AFUB_060340	Cluster 18	NRPS	23.219	24.9272	28.9757	25.7073	20.3551	19.1769	16.9213	18.8178	-0.442347	0.0884391
	AFUB_060350			126.543	61.0613	4.97896	64.1944	17.2598	100.096	113.681	77.0123	0.279649	0.820666
	AFUB_060360			0	0	0	0	1.4503	0	1.21514	0.88848	1.80301	0.612787
	AFUB_060370			0.906155	0	0.548417	0.484857	0.387264	0.317691	0.648938	0.451298	-0.0942528	0.941261
	AFUB_060380			28.3512	32.8234	35.5302	32.2349	14.6866	19.9547	27.3021	20.6478	-0.629934	0.0745763
	AFUB_060390			20.3099	16.146	22.3016	19.5858	3.29615	5.40796	6.90418	5.20276	-1.89301	1.78e-06
	AFUB_060400			16.2016	16.6663	14.2043	15.6907	4.45923	4.30621	4.13332	4.29959	-1.85808	1.3e-18
9	AFUB_094860	Cluster 19 ( Fumisoquin A-C)	NRPS-like	37.9355	31.6044	57.5278	42.3559	14.3376	15.8332	15.478	15.2163	-1.46829	9.99e-06
	AFUB_094850			85.8609	81.0283	37.9421	68.2771	10.4841	10.9897	7.5641	9.6793	-2.80697	7.3e-13
	AFUB_094840			16.2742	18.1962	8.20782	14.2261	8.69392	5.8353	4.9665	6.49857	-1.12696	0.0202187
	AFUB_094830			61.3292	53.7098	69.4917	61.5102	12.6683	15.0511	16.2872	14.6689	-2.05663	1.33e-14
	AFUB_094820			38.2104	35.024	26.5112	33.2486	7.66879	6.01352	8.50406	7.39546	-2.15922	6.24e-14
	AFUB_094810			5.59099	6.42788	6.00938	6.00942	2.83989	2.08869	1.96916	2.29925	-1.38421	0.00011959
	AFUB_094800			15.4409	14.9563	8.60117	12.9995	4.43217	3.63591	2.88827	3.65212	-1.82671	2.93e-05
12	AFUB_086670	Cluster 24 (Neosartoricin)	PKS	68.8962	14.5948	2.0683	28.5198	4.81974	17.9721	16.8871	13.2263	-1.08593	0.38722
	AFUB_086680			75.8404	27.5003	3.53345	35.6247	2.99418	27.1724	24.6163	18.261	-0.944985	0.454522
	AFUB_086690			159.97	84.7646	59.5893	101.441	12.4109	44.5066	50.2098	35.7091	-1.49058	0.00373352
	AFUB_086700			34.03	9.10293	0	14.3777	0.323187	3.84432	3.45248	2.54	-2.47951	0.229718
	AFUB_086710			161.754	42.5629	0	68.1057	4.15285	21.4889	19.5385	15.0601	-2.15556	0.279925
	AFUB_086720			62.2867	10.7913	0	24.3593	3.2127	8.65959	10.767	7.54644	-1.66734	0.353265
13	AFUB_086360	Cluster 25 (Fumitremorgin B)	NRPS	13.9301	21.0686	48.7767	27.9252	4.13061	3.1196	3.07629	3.44217	-3.01764	4.39e-11
	AFUB_086350			125.804	106.31	112.227	114.78	37.2935	54.8136	51.2093	47.7721	-1.25283	8.36e-07
	AFUB_086340			312.997	302.103	330.007	315.036	78.4995	79.9906	72.2593	76.9165	-2.02494	2.72e-22
	AFUB_086330			155.3	133.835	159.3	149.478	21.5206	15.0958	19.599	18.7385	-2.99035	8.78e-30
	AFUB_086320			77.0149	70.9076	84.1794	77.3673	9.3568	6.77278	11.99	9.37318	-3.03758	3.79e-23
	AFUB_086310			399.788	336.235	439.368	391.797	96.8525	28.5214	39.1174	54.8304	-2.83067	3.93e-11
	AFUB_086300			22.0413	23.9153	44.4656	30.1407	14.0723	9.42378	6.97801	10.158	-1.56791	0.000216843
	AFUB_086290			96.0977	95.2765	187.147	126.174	42.357	9.72928	9.93686	20.6744	-2.60687	2.6e-06
	AFUB_086280			1.59462	0.625924	2.01059	1.41038	0.916701	0.873533	0.89217	0.894135	-0.209956	0.794686
14	AFUB_086200	Cluster 26 (Fumagillin)	PKS	14.1639	17.5948	8.61665	13.4584	6.1239	4.20253	4.53888	4.9551	-1.43322	3.63e-05
	AFUB_086190			69.4925	60.6164	36.9174	55.6754	60.3881	52.3816	71.747	61.5055	0.154906	0.635743
	AFUB_086180			218.605	272.187	180.362	223.718	132.799	68.3271	86.3772	95.8344	-1.21547	0.000218822
	AFUB_086170			184.422	144.045	132.2	153.555	38.008	29.5387	27.6548	31.7338	-2.26943	8.85e-13
	AFUB_086160			116.178	86.9701	89.6567	97.6015	44.1285	69.2258	68.3244	60.5595	-0.67658	0.0167836
	AFUB_086150			32.6652	17.7796	8.56674	19.6705	16.2868	33.2113	39.963	29.8204	0.615624	0.216582
	AFUB_086140			322.172	287.767	161.186	257.042	215.71	158.885	162.275	178.956	-0.511118	0.120111
	AFUB_086110			406.885	435.18	376.706	406.257	124.26	142.292	130.673	132.408	-1.60742	1.1e-14
	AFUB_086100			96.3965	116.345	76.3982	96.3798	104.569	94.4042	89.8144	96.2625	0.00778037	0.976977
	AFUB_086090			106.106	99.9573	57.9425	88.0018	76.2289	72.7961	67.7987	72.2746	-0.272604	0.368119
	AFUB_086080			9.46727	9.63051	8.33902	9.1456	10.5425	7.71352	6.68444	8.31348	-0.131818	0.687666
	AFUB_086070			49.0702	48.608	27.8773	41.8518	23.1004	18.7856	22.889	21.5917	-0.944489	0.00261938
	AFUB_086060			63.4474	59.0036	29.3221	50.591	44.5624	37.886	38.468	40.3055	-0.316324	0.354637
	AFUB_086050			65.5306	50.6279	28.3286	48.1624	43.3424	44.4448	44.6947	44.1606	-0.112562	0.768036
15	AFUB_086130	Cluster 27 (Pseurotin A)	PKS-NRPS	134.394	127.814	107.3	123.169	76.0369	50.0326	52.9778	59.6824	-1.03565	8.87e-05
	AFUB_086120			520.451	428.948	256.322	401.907	147.092	214.832	229.782	197.235	-1.01441	0.00228182
	AFUB_086040			109.263	126.156	72.1447	102.521	47.8015	36.5462	33.5116	39.2864	-1.3748	1.02e-05
	AFUB_086030			30.6372	28.0483	18.3842	25.6899	15.4404	7.57006	8.97959	10.6633	-1.43462	0.000131965
	AFUB_086020			752.07	1077.65	713.803	847.842	629.176	364.362	377.496	457.011	-0.882589	0.00526105
	AFUB_086010			49.6867	51.2042	26.0926	42.3278	30.6479	36.5905	34.6199	33.9528	-0.305881	0.354925
	AFUB_086000			50.9912	36.0734	11.7057	32.9234	17.6591	19.4182	22.6658	19.9144	-0.710309	0.144482
	AFUB_085990			153.993	171.338	62.7077	129.346	87.1401	166.965	171.038	141.714	0.143717	0.734863
16	AFUB_071550	Cluster 34 (Fmihopaside)	Terpene	184.602	193.805	167.678	182.028	8.83135	6.43979	6.90605	7.3924	-4.61918	8.98e-69
	AFUB_071560			896.324	888.798	727.647	837.59	89.4686	32.724	36.287	52.8265	-3.9781	4.32e-24
	AFUB_071569			923.53	970.309	1089.43	994.424	46.9869	23.9771	21.0789	30.681	-5.01466	3.29e-50
	AFUB_071570			29.0357	29.2528	25.9931	28.0939	5.04116	3.81739	0	2.95285	-3.25848	1.73e-07
17	AFUB_079640	Cluster 38	PKS	0	0	0	0	0	0	0	0	0	0
	AFUB_079650			0.448734	0.469702	0	0.306145	0.23972	0.58996	0.401698	0.410459	0.451942	0.7662
	AFUB_079660			0.53653	0	0.541191	0.35924	0.573243	0	0.960582	0.511275	0.50365	0.815851
	AFUB_079670			1.86801	0	0	0.62267	1.33055	3.27455	4.45922	3.02144	2.29002	0.106108
	AFUB_079680			0	0	0	0	0	0	0	0	0	0
	AFUB_079690			0.643327	0	0	0.214442	0	0	0	0	0	0
	AFUB_079700			0.179079	0.562341	0.36127	0.367563	0.191333	0.313919	0	0.168417	-1.11549	0.486833
	AFUB_079710			0.192998	0.404033	0.324458	0.307163	0	0	0	0	-4.77468	0.00400378
	AFUB_079720			12.3723	18.8706	11.0535	14.0988	0.755367	0.619662	2.53153	1.30219	-3.4102	1.27e-07
	AFUB_079730			14.8169	17.0102	11.0887	14.3053	1.53201	0.837853	2.13932	1.50306	-3.24489	8.35e-07
	AFUB_079740			11.2877	12.4211	12.8455	12.1848	0.309233	0.761035	1.55455	0.874938	-3.75454	2.21e-09
	AFUB_079750			4.24892	2.10669	4.73698	3.69753	0	0.196005	0.800749	0.332251	-3.41733	0.000303686
	AFUB_079760			11.3888	20.9422	31.6689	21.3333	4.93301	7.55398	3.58203	5.35634	-1.98482	7.84e-05
	AFUB_079770			5.20265	3.46548	2.38539	3.68451	4.54799	3.73093	3.38714	3.88869	0.0839364	0.903594
	AFUB_079780			1.15231	3.61846	1.39478	2.05518	0.492463	1.21197	2.68196	1.46213	-0.46779	0.580155
	AFUB_079790			6.0022	5.79938	2.32859	4.71006	4.43971	5.66549	8.67954	6.26158	0.428306	0.497283
18	AFUB_045650	Cluster 39	PKS-NRPS	323.866	373.783	296.568	331.406	151.048	113.051	118.993	127.697	-1.36774	3.13e-08
	AFUB_045660			1.34398	2.81356	1.35566	1.83773	0	0	0	0	-3.96891	0.0397197
	AFUB_045670			0.274503	0.430996	0.138444	0.281314	1.61308	0	0.491461	0.701513	1.31189	0.321535
	AFUB_045680			6.11952	9.31704	25.813	13.7499	19.0204	5.85124	5.47807	10.1166	-0.449122	0.52112
	AFUB_045690			88.8869	87.2704	67.4181	81.1918	38.2821	50.1266	32.6915	40.3667	-0.995834	0.00162759
	AFUB_045700			0	0.445407	0	0.148469	0	0	0	0	0	NA
	AFUB_045710			0	0	0	0	0	0	0	0	0	NA
	AFUB_045720			0.754122	0	1.52135	0.75849	0	0	2.02523	0.675076	-0.148682	0.947673
	AFUB_045730			0	0	0	0	0.692269	0	0	0.230756	1.91845	0.633571
	AFUB_045740			0.390063	0	0.393452	0.261172	0.416754	0.683765	0.349177	0.483232	0.894779	0.637029
	AFUB_045750			2.01847	2.11279	1.018	1.71642	3.23488	6.19202	2.25862	3.89517	1.20074	0.172175
	AFUB_045760			3.64059	9.79896	8.39365	7.27773	13.3361	10.0286	13.0359	12.1335	0.74418	0.159888
	AFUB_045770			19.8078	16.4648	29.0884	21.787	17.7398	8.68059	9.38732	11.9359	-0.867558	0.0380942
	AFUB_045780			39.4544	47.1977	77.9362	54.8628	39.8959	24.0832	22.2845	28.7545	-0.927341	0.0136659
	AFUB_045790			37.6513	34.1417	35.1309	35.6413	3.70661	3.72636	3.04469	3.49255	-3.34208	2.31e-48
	AFUB_045800			233.532	205.207	205.03	214.589	17.4136	31.4274	30.2221	26.3544	-3.01181	1.23e-25

## Sheet: ΔlaeB
Supplementary Table 4 - RNA-seq data for regulated BGCs in A. fumigatus.
Negative regulation (6)
No.	Gene ID	Cluster Number	Type	A. fumigatus WT_1_fpkm	A. fumigatus WT_2_fpkm	A. fumigatus WT_3_fpkm	A. fumigatus WT_mean	ΔlaeB_1_fpkm	ΔlaeB_2_fpkm	ΔlaeB_3_fpkm	ΔlaeB_mean	Log2foldchange	p value
1	AFUB_036300	Cluster 10 (Hexadehydroastechrome)	NRPS	67.5415	50.3505	31.5717	49.8212	433.023	164.773	299.337	299.044	2.57815	1.08e-11
	AFUB_036290			214.472	281.012	112.276	202.587	3037.1	664.307	1671.79	1791.07	3.13136	8.75e-12
	AFUB_036280			100.086	62.8578	32.8107	65.2516	637.415	396.735	446.313	493.488	2.91425	5.03e-15
	AFUB_036270			6.38716	3.12412	2.22783	3.91303	37.8271	18.6677	17.7714	24.7554	2.65714	1.96e-10
	AFUB_036260			47.3518	39.0508	8.39476	31.5991	705.803	365.642	497.687	523.044	4.03951	4.1e-18
	AFUB_036250			10.838	6.6951	4.48041	7.33785	10.5212	6.79229	9.2502	8.85455	0.264857	0.519119
	AFUB_036240			47.7557	28.1746	16.0569	30.6624	83.914	47.3421	54.9684	62.0748	1.0122	0.0103716
	AFUB_036230			90.1662	36.3593	16.4007	47.6421	305.976	191.139	153.732	216.949	2.18346	4.81e-06
2	AFUB_100680	Cluster 14 (Endocrocin)	PKS	0	0	0.403898	0.134633	0.61588	0	0.293621	0.303167	1.02402	0.698387
	AFUB_100690			0	0	0	0	0.27544	0.149641	0.262632	0.229237	3.35097	0.107353
	AFUB_100710			6.42566	4.20369	0	3.54312	1.2354	1.51013	4.71183	2.48579	-0.525129	0.644866
	AFUB_100720			1.21198	2.53723	1.83377	1.86099	4.89336	3.41802	5.77672	4.69603	1.33267	0.0374016
	AFUB_100730			0.381941	2.53723	0.693468	1.20421	5.58087	2.96814	4.76122	4.43674	3.16918	9.52e-10
	AFUB_100740			0	0.899271	0.433295	0.444189	4.2946	5.38422	5.66985	5.11622	3.5454	0.000939601
	AFUB_100750			4.47501	0	0	1.49167	13.7659	15.4249	19.1418	16.1109	3.4171	6.99e-05
	AFUB_100760			0	0.420369	0	0.140123	3.08851	7.55065	10.3071	6.9821	5.57942	3.9e-05
	AFUB_100770			41.8957	49.1158	59.1636	50.0583	16.7542	48.3117	44.2388	36.4349	-0.444566	0.359387
3	AFUB_075680	Cluster 21 (Gliotoxin)	NRPS	0.811207	1.13215	0.409128	0.784162	1.87156	1.77937	0.991408	1.54745	0.980667	0.0939511
	AFUB_075690			0.665402	0.696494	0	0.453965	1.15117	1.25104	1.48793	1.29671	1.51421	0.0273716
	AFUB_075700			0	1.26861	2.44502	1.23788	3.72828	3.27868	2.66618	3.22438	1.38115	0.061372
	AFUB_075710			0.0635496	0	0	0.0211832	0.146618	0.199135	0.1864	0.177384	3.06588	0.00410714
	AFUB_075720			0	0.291158	0.84173	0.377629	0.641752	1.07163	0.871626	0.861668	1.19016	0.154668
	AFUB_075730			0	0	0	0	0	0	0	0	0	0
	AFUB_075740			0	0	0.329138	0.109713	0.250942	0.304497	0.65709	0.404176	1.88125	0.15476
	AFUB_075750			0	0	0	0	0	0	0	0	0	0
	AFUB_075760			1.02576	3.75791	5.17335	3.31901	4.53591	4.33925	3.9489	4.27469	0.365067	0.480366
	AFUB_075770			3.35758	3.51447	0.483821	2.45195	4.79538	4.50905	7.38617	5.56353	1.18207	0.0816511
	AFUB_075780			76.8038	75.7657	70.783	74.4508	57.7908	91.7655	84.6811	78.0791	0.0686489	0.747403
	AFUB_075790			58.9324	39.4922	43.0893	47.1713	105.99	168.448	139.703	138.047	1.54918	0.00877463
4	AFUB_078030	Cluster 22 (Fumiquizoline)	NRPS	10.9101	10.8887	3.58299	8.46061	1.36587	1.11307	1.48841	1.32245	-2.68733	6.95e-06
	AFUB_078040			1.87069	0.489526	0.353802	0.904673	6.02433	6.96099	11.5741	8.18648	3.17055	1.01e-08
	AFUB_078050			1.29587	2.71284	0.326781	1.44516	7.72349	14.0093	18.2921	13.3416	3.21391	5.48e-07
	AFUB_078060			0.272574	0.570622	0	0.281065	8.5945	17.7658	14.7907	13.717	5.63157	2.63e-09
	AFUB_078070			3.1911	2.22681	2.42277	2.61356	5.30403	3.41917	5.8877	4.8703	0.894214	0.00556052
5	AFUB_087760	Cluster 37	Terpene	0	0	0.232859	0.0776198	0.710148	0.289356	0	0.333168	1.97894	0.379919
	AFUB_087770			0.26205	0.54859	0	0.270213	0.201528	0	0	0.0671761	-2.03106	0.417244
	AFUB_087780			2.4414	1.53329	0.492523	1.48907	41.3061	22.3387	61.2262	41.6237	4.7959	1.44e-13
	AFUB_087790			13.7186	17.3827	7.28305	12.7948	11.1055	10.4076	14.8247	12.1126	-0.0831319	0.873291
	AFUB_087800			31.9224	27.6945	33.3601	30.9923	70.1105	122.559	93.2109	95.2936	1.62767	4.82e-08
	AFUB_087810			64.9078	83.5967	150.3	99.6016	133.691	113.369	116.713	121.258	0.289719	0.368566
	AFUB_087820			125.973	72.657	37.6015	78.7437	6.12906	4.3502	2.0737	4.18432	-4.23719	1.53e-19
	AFUB_087830			0.652606	2.7324	0	1.12834	0	1.22698	0	0.408994	-1.39704	0.491492
	AFUB_087840			78.383	70.8032	30.888	60.0247	107.204	56.857	112.273	92.1111	0.608914	0.110418
6	AFUB_079640	Cluster 38	PKS	0	0	0	0	0	0	0	0	0	0
	AFUB_079650			0.448734	0.469702	0	0.306145	0.172548	0.562451	0	0.245	-0.284747	0.874608
	AFUB_079660			0.53653	0	0.541191	0.35924	1.23785	2.68998	1.57371	1.83385	2.35856	0.120819
	AFUB_079670			1.86801	0	0	0.62267	0	0.780465	0.456594	0.412353	-0.567222	0.802379
	AFUB_079680			0	0	0	0	0	0	0	0	0	0
	AFUB_079690			0.643327	0	0	0.214442	0	0	0	0	0	0
	AFUB_079700			0.179079	0.562341	0.36127	0.367563	0.41316	0.224461	0.131316	0.256312	-0.525473	0.703477
	AFUB_079710			0.192998	0.404033	0.324458	0.307163	1.23687	1.24985	1.60392	1.36355	2.15414	0.000589026
	AFUB_079720			12.3723	18.8706	11.0535	14.0988	10.6023	14.1784	31.8831	18.8879	0.417151	0.367678
	AFUB_079730			14.8169	17.0102	11.0887	14.3053	20.2167	25.4613	26.2863	23.9881	0.748356	0.0473519
	AFUB_079740			11.2877	12.4211	12.8455	12.1848	11.5743	16.6876	16.7664	15.0095	0.306531	0.385141
	AFUB_079750			4.24892	2.10669	4.73698	3.69753	1.89178	3.22344	4.26355	3.12625	-0.235464	0.674767
	AFUB_079760			11.3888	20.9422	31.6689	21.3333	37.1644	17.5543	22.5708	25.7632	0.271784	0.51763
	AFUB_079770			5.20265	3.46548	2.38539	3.68451	4.36481	7.70675	16.9942	9.68858	1.39122	0.0347417
	AFUB_079780			1.15231	3.61846	1.39478	2.05518	0.886177	1.01103	0.844969	0.914058	-1.16456	0.145813
	AFUB_079790			6.0022	5.79938	2.32859	4.71006	6.7464	6.65519	4.73988	6.04716	0.361966	0.551483
Positive regulation (14)
No.	Gene ID	Cluster Number	Type	A. fumigatus WT_1_fpkm	A. fumigatus WT_2_fpkm	A. fumigatus WT_3_fpkm	A. fumigatus WT_mean	ΔlaeB_1_fpkm	ΔlaeB_2_fpkm	ΔlaeB_3_fpkm	ΔlaeB_mean	Log2foldchange	p value
1	AFUB_009720	Cluster 1 (Fumiganins)	NRPS	26.9941	36.934	52.318	38.7487	52.1959	72.8659	70.5528	65.2049	0.757428	0.0137399
	AFUB_009730			12.699	10.7776	14.3672	12.6146	15.0451	20.3266	14.4713	16.6143	0.405191	0.193688
	AFUB_009740			11.5998	13.6918	12.1984	12.4967	24.6744	35.111	21.7173	27.1675	1.12762	0.000694395
	AFUB_009750			151.64	208.007	283.094	214.247	427.912	360.209	500.826	429.649	1.00601	0.000481045
	AFUB_009760			1770.82	1766.88	1157.61	1565.1	565.663	350.866	555.552	490.694	-1.6787	5.06e-09
	AFUB_009770			245.628	289.244	327.633	287.502	213.754	421.302	363.786	332.947	0.21907	0.491046
	AFUB_009780			44.1255	42.8603	41.1141	42.7	47.307	26.0133	32.3565	35.2256	-0.280988	0.333597
	AFUB_009790			246.517	214.396	158.682	206.532	45.485	16.2546	36.4378	32.7258	-2.66709	1.04e-13
	AFUB_009800			89.5204	90.2137	107.113	95.6157	22.5059	25.8604	26.0353	24.8005	-1.6027	2.35e-09
	AFUB_009810			204.311	112.382	46.8292	121.174	39.3526	41.5733	47.3468	42.7575	-1.50613	0.00029652
	AFUB_009820			3.20244	3.67647	6.14792	4.34227	7.4679	9.25807	8.25691	8.32763	0.946834	0.0080002
	AFUB_009830			39.6724	43.5618	41.1941	41.4761	45.1666	37.5383	39.6438	40.7829	-0.024545	0.928477
	AFUB_009840			13.2431	2.31032	6.67909	7.41084	2.9705	4.4956	4.04624	3.83745	-0.941014	0.182859
2	AFUB_016500	Cluster 2 (Ferricrocin, hydroxyferricrocin)	NRPS	23.5838	15.0753	13.6195	17.4262	11.4914	9.02607	10.957	10.4915	-0.734803	0.0281814
	AFUB_016510			331.063	268.097	195.779	264.98	70.3817	58.1252	79.72	69.409	-1.93629	2.9e-11
	AFUB_016520			25.2711	30.2308	11.6529	22.3849	3.88693	0.452504	2.11782	2.15242	-3.4288	7.98e-07
	AFUB_016530			33.4548	35.0181	17.4546	28.6425	13.012	6.50682	5.07556	8.19813	-1.81504	5.5e-05
	AFUB_016540			4.28208	2.46519	3.0235	3.25693	1.97587	2.95198	0.941994	1.95661	-0.718247	0.244901
	AFUB_016550			0.729796	0.254632	0	0.328143	0.374164	0.304913	0.178382	0.28582	-0.204477	0.902297
	AFUB_016560			14.3499	11.3668	2.34722	9.35463	0.596524	0.729177	0.568785	0.631495	-3.88417	4.65e-06
	AFUB_016570			13.542	8.09985	1.30092	7.64757	11.6542	10.9117	18.4416	13.6692	0.829773	0.156787
	AFUB_016580			0.689046	2.16373	0	0.950925	5.29907	7.9169	4.88424	6.0334	2.67747	0.000205392
	AFUB_016590			7.18031	5.78599	5.08713	6.01781	3.02394	2.1607	2.73707	2.64057	-1.19181	2.83e-05
	AFUB_016600			0	0	0	0	0	0	0	0	0	0
	AFUB_016610			0.358158	0	0.36127	0.239809	0	0.224461	2.88895	1.0378	2.09716	0.254105
	AFUB_016620			3.70767	1.29364	1.86994	2.29042	4.75228	5.03453	5.28651	5.02444	1.13261	0.0333447
	AFUB_016630			4.06987	9.27185	2.89781	5.41317	6.44393	3.00073	2.28216	3.90894	-0.480663	0.416839
	AFUB_016640			1964.89	1482.32	970.103	1472.44	1118.69	2222.7	2711.51	2017.63	0.454395	0.210675
	AFUB_016650			1.79791	0.47048	0.453382	0.907256	10.7157	7.60566	6.26229	8.19455	3.16575	0.000129018
	AFUB_016660			3.10163	3.62851	1.28824	2.67279	18.2405	4.57369	8.56236	10.4588	1.95626	0.000456887
3	AFUB_033640	Cluster 5 (Fumigaclavine A-C)	Indole	0	0	0	0	0	0.7271	0	0.242367	0	0
	AFUB_033650			0.720117	0	0	0.240039	0	0.225652	0.792075	0.339242	0.486696	0.833356
	AFUB_033660			0.932934	0	0	0.310978	0.358734	0.877017	4.10464	1.78013	2.49477	0.132002
	AFUB_033670			0	0	0	0	0	0	0	0	0	0
	AFUB_033680			0.310622	0	0	0.103541	0.238883	1.36269	1.59442	1.06533	3.24378	0.0620963
	AFUB_033690			0.518099	0	0	0.1727	1.19532	2.92228	4.17905	2.76555	3.87614	0.013341
	AFUB_033700			0	0	0	0	0	0.981585	0	0.327195	2.7838	0.35548
	AFUB_033710			0	0	0	0	0.210892	0	0	0.0702974	0	0
	AFUB_033720			11.2033	11.9995	3.15366	8.78547	6.21141	8.16417	16.4304	10.2686	0.217552	0.682466
	AFUB_033730			2.40251	1.25739	0	1.21997	0.692865	0	0.880862	0.524576	-1.25686	0.357202
	AFUB_033740			1.51064	2.71068	0	1.40711	0.165965	0	0	0.0553215	-4.6951	0.00526018
	AFUB_033750			1.19772	0	0	0.399241	0	0	0.585514	0.195171	-1.06202	0.684057
	AFUB_033760			0.608708	0	0	0.202903	0.468124	0	0	0.156041	-0.52464	0.884029
4	AFUB_045860	Cluster 7	PKS	7.25339	5.06155	5.34214	5.88569	0.35417	0.216465	0.675402	0.415346	-3.8465	4.44e-12
	AFUB_045830			0.391752	0.615086	0	0.335613	0	0.245514	0	0.0818381	-1.95365	0.351242
	AFUB_045820			3.51663	3.92635	4.4931	3.9787	1.80297	3.08546	2.23486	2.37443	-0.730111	0.181379
	AFUB_045810			0.94484	1.31865	0.635366	0.966286	2.9065	1.38166	1.38567	1.89128	0.960885	0.297515
	AFUB_045800			233.532	205.207	205.03	214.589	10.0273	5.98267	10.244	8.75133	-4.62475	3.46e-60
	AFUB_045640			0.27545	0.172993	0.111137	0.186527	0	0.0345254	0.0403967	0.024974	-2.86697	0.0677635
	AFUB_045630			0	0	0	0	0	0	0	0	0	0
5	AFUB_045610	Cluster 8	NRPS-like	6.6465	5.88676	1.41821	4.65049	3.04722	1.60208	2.24943	2.29958	-1.0289	0.0635873
	AFUB_045600			1.45334	0.6085	0.293194	0.785011	1.11768	0.910821	1.06571	1.03141	0.386777	0.717915
	AFUB_045595			0	1.0296	0.496092	0.508564	2.26938	3.08227	1.44257	2.26474	2.17692	0.0928074
	AFUB_045590			0	0	0	0	6.52448	7.97538	2.0737	5.52452	4.39391	0.0111922
	AFUB_045580			0.662156	2.31032	0.222636	1.06504	51.0925	27.2503	42.8901	40.411	5.25295	2.13e-22
	AFUB_045570			0	0	0	0	4.07382	2.90485	4.85548	3.94472	5.98721	1.53e-05
	AFUB_045560			0	0	0.236888	0.0789627	7.22434	5.74006	4.82188	5.92876	6.11338	2.08e-06
	AFUB_045550			4.35536	4.55887	5.1254	4.67988	1.11649	5.00416	2.66143	2.92736	-0.646331	0.450974
	AFUB_045540			0.873875	0.548826	0.352587	0.591763	1.3441	0.547665	0.512639	0.801468	0.423737	0.662643
	AFUB_045530			0.316907	0.221144	0.319661	0.285904	0.487432	0.0662029	0.387305	0.313647	0.108053	0.92468
6	AFUB_044980	Cluster 9 (Fusarinine C, triacetylfusarinine C)	NRPS	12.4951	11.2954	2.86446	8.885	12.23	8.54266	5.83064	8.86777	-0.00816631	0.989306
	AFUB_044970			1240.88	931.537	269.332	813.917	872.561	303.023	736.885	637.49	-0.364326	0.444698
	AFUB_044960			262.682	203.186	58.8809	174.916	4.63171	5.22618	6.11493	5.32427	-5.04215	5.16e-25
	AFUB_044950			1.06325	1.29843	1.25124	1.20431	3.40704	0	0.909611	1.43888	0.233848	0.814503
	AFUB_044940			0	0	0.478746	0.159582	1.82503	2.3796	1.0441	1.74958	3.34747	0.043635
	AFUB_044930			1.34066	3.50827	2.70462	2.51785	1.28879	1.68041	1.96617	1.64512	-0.608164	0.433044
	AFUB_044920			500.07	491.684	494.524	495.426	14.3745	12.8662	23.143	16.7946	-4.88617	6.13e-69
	AFUB_044910			285.423	306.403	259.782	283.87	24.2475	16.4317	25.797	22.1587	-3.68546	3.16e-43
	AFUB_044900			14.2819	12.9964	20.3111	15.8631	8.16333	3.58829	4.05697	5.26953	-1.59176	8.7e-06
	AFUB_044890			198.169	281.89	255.538	245.199	434.314	411.706	452.975	432.998	0.820914	0.000789957
	AFUB_044880			0	0	0	0	0	0	0	0	0	0
	AFUB_044870			1.25687	1.9734	0	1.07676	7.24942	10.24	5.06903	7.51948	2.81863	0.00297293
	AFUB_044860			11.4712	5.20311	6.5568	7.74369	5.58716	7.42871	8.692	7.23596	-0.0953401	0.848918
	AFUB_044850			21.4021	7.97885	5.6188	11.6666	9.69513	3.67476	10.9642	8.11135	-0.536996	0.334546
	AFUB_044840			15.5277	14.6804	4.5472	11.5851	8.08939	4.70871	9.54971	7.44927	-0.650113	0.249298
	AFUB_044830			6.31812	2.31808	1.90534	3.51385	1.2523	0.693955	1.05078	0.999011	-1.82419	0.000433935
	AFUB_044820			4.1259	1.51154	0.728305	2.12191	1.9038	1.61608	3.47927	2.33305	0.128363	0.832821
	AFUB_044810			38.5244	18.5019	10.5148	22.5137	27.5357	21.5872	32.9022	27.3417	0.275274	0.517229
	AFUB_044800			76.4895	36.085	20.1035	44.226	33.5545	21.2677	31.5992	28.8071	-0.625301	0.169166
	AFUB_044790			1.05023	0.824477	0	0.624902	0.403836	0.987281	0.577586	0.656234	0.0837665	0.947045
	AFUB_044780			0	0	0	0	0.463963	0.756184	0	0.406716	0	0.575753
	AFUB_044770			9.15114	2.39469	0.769221	4.10502	4.10529	0.477925	1.6776	2.08694	1.8679	0.367948
	AFUB_044760			0	0	0	0	0	0	0	0	-1.00937	0
	AFUB_044750			1.67583	0.584711	1.69039	1.31698	1.28879	0.70017	0.819238	0.936065	-0.502351	0.694251
	AFUB_044740			1.02835	0	1.03728	0.688544	0.790846	0	2.26221	1.01769	0.53664	0.802671
	AFUB_044730			1.53961	1.34296	0.517661	1.13341	0.789351	0.482442	0.564484	0.612093	-0.900259	0.377801
	AFUB_044720			0.780126	1.63316	0.393452	0.935579	1.1999	0	1.43014	0.87668	-0.125922	0.925578
	AFUB_044710			3.03673	3.4965	5.81992	4.11772	3.73662	2.47409	3.78554	3.33208	-0.309164	0.592993
	AFUB_044700			0	1.44249	0	0.480829	0	0	0.505266	0.168422	-1.46901	0.629695
	AFUB_044690			3.51924	2.28037	1.52135	2.44032	2.06206	2.31056	0.8602	1.74427	-0.476811	0.441453
	AFUB_044680			169.012	143.478	101.349	137.946	139.189	51.7096	73.1893	88.0293	-0.655937	0.0837298
	AFUB_044670			153.67	96.9573	74.4887	108.372	73.8621	24.8792	38.8133	45.8515	-1.24922	0.00219643
	AFUB_044660			174.292	118.852	30.8721	108.005	22.1001	7.90674	25.0128	18.3399	-2.57227	7.72e-07
	AFUB_044650			525.843	415.183	134.635	358.554	65.0753	14.9939	38.9655	39.6782	-3.18972	1.54e-10
	AFUB_044640			705.418	541.825	140.532	462.591	119.426	49.3513	91.4613	86.7462	-2.42625	3.15e-07
	AFUB_044630			3.70403	2.05259	1.09889	2.28517	0	0.2731	0.159771	0.14429	-3.91944	0.00069417
	AFUB_044620			30.8504	19.8365	1.33365	17.3402	12.5406	10.7719	10.6647	11.3257	-0.621846	0.352704
	AFUB_044610			439.642	381.721	399.729	407.03	462.44	604.129	617.429	561.332	0.466684	0.0468813
7	AFUB_071710	Cluster 15 (Trypacidin)	PKS	1.27258	0.88803	3.42303	1.86122	0	2.12677	1.55527	1.22735	-0.565681	0.617383
	AFUB_071720			2.51374	0.877067	0	1.13027	2.57757	1.57538	5.52986	3.2276	1.4958	0.253006
	AFUB_071730			0.949245	0	1.91498	0.954743	0.730012	0.5949	0	0.441637	-1.09699	0.622011
	AFUB_071740			0	0	0.448923	0.149641	0	0.41838	0	0.13946	-0.0295452	0.991328
	AFUB_071750			0	0.637152	0.920996	0.519383	0.234062	0	0.446356	0.226806	-1.22478	0.50354
	AFUB_071760			0.959307	1.00413	0.483821	0.815754	15.1239	4.20844	8.79306	9.37513	3.51256	8.84e-05
	AFUB_071770			2.0567	0.5382	1.03728	1.21073	3.16339	0.644475	3.77036	2.52607	1.03863	0.341062
	AFUB_071780			0	0	2.06934	0.68978	0	0.214284	0.501448	0.238577	-1.50916	0.447817
	AFUB_071790			5.57844	5.51471	14.6925	8.59521	3.57506	1.74803	2.72705	2.68338	-1.68485	0.00355841
	AFUB_071800			4.59746	5.70949	15.6414	8.64946	2.21728	1.70923	1.59991	1.84214	-2.22347	1.65e-06
	AFUB_071810			7.18883	8.41001	14.9291	10.176	3.57729	2.12014	4.65128	3.44957	-1.56864	0.0053213
	AFUB_071820			7.30702	10.296	23.5289	13.7107	3.89037	1.93743	2.06082	2.62954	-2.38576	1.11e-05
8	AFUB_057720	Cluster 17	NRPS-like	50.1447	54.7166	62.1784	55.6799	25.1359	31.7597	22.9522	26.6159	-1.05873	3e-05
	AFUB_057730			0	0	0.530703	0.176901	0	0.329731	0	0.10991	-0.524639	0.88722
	AFUB_057740			6.35388	0	1.16529	2.50639	0	0	0	0	-5.05639	0.179819
	AFUB_057750			0	0.9108	0	0.3036	0	0	0.63806	0.212687	-0.52464	0.88342
	AFUB_057760			0	0	0.894911	0.298304	0	0	0	0	-2.35029	0.538312
	AFUB_057770			3.15679	1.10143	0	1.41941	0.269746	0.439642	1.28601	0.665134	-1.10563	0.388979
	AFUB_057780			0.900942	0.314347	0	0.405096	0.230955	1.31747	0.660646	0.736356	0.880559	0.547911
	AFUB_057790			8.75755	4.07412	3.4353	5.42232	5.61246	5.48843	8.56236	6.55442	0.268847	0.65663
	AFUB_057800			0.353495	0.370013	0.713132	0.47888	1.08741	0.221538	1.81448	1.04115	1.10226	0.416689
	AFUB_057810			0.952575	0	1.44128	0.797951	0	0.596987	0.698508	0.431832	-0.858628	0.623719
	AFUB_057820			1.93365	0.4048	0.780179	1.03954	0.594825	0	1.13433	0.576385	-0.885422	0.528527
	AFUB_057830			39.4805	36.2177	14.766	30.1547	9.55218	1.94606	7.48157	6.3266	-2.27723	2.52e-05
	AFUB_057840			50.1795	58.5848	56.4557	55.0733	32.1586	25.4002	39.6263	32.395	-0.768943	0.0165495
	AFUB_057850			661.238	694.246	475.836	610.44	71.8339	82.5438	132.06	95.4791	-2.67974	1.61e-18
9	AFUB_060340	Cluster 18	NRPS	23.219	24.9272	28.9757	25.7073	32.3935	25.9316	22.9198	27.0816	0.0770472	0.774775
	AFUB_060350			126.543	61.0613	4.97896	64.1944	26.5724	36.9811	25.0077	29.5204	-1.1229	0.295699
	AFUB_060360			0	0	0	0	0	0	0	0	0	0
	AFUB_060370			0.906155	0	0.548417	0.484857	0.696874	0.681474	0.132894	0.503747	0.064021	0.959223
	AFUB_060380			28.3512	32.8234	35.5302	32.2349	22.7944	13.999	21.7344	19.5093	-0.729482	0.0309544
	AFUB_060390			20.3099	16.146	22.3016	19.5858	5.33821	3.70573	4.14739	4.39711	-2.15888	6.01e-09
	AFUB_060400			16.2016	16.6663	14.2043	15.6907	4.90304	3.51157	4.01234	4.14232	-1.92368	2.29e-15
10	AFUB_086670	Cluster 24 (Neosartoricin)	PKS	68.8962	14.5948	2.0683	28.5198	0	0	0	0	-9.06528	6.81e-05
	AFUB_086680			75.8404	27.5003	3.53345	35.6247	0.673495	0.329306	0.899048	0.633949	-5.82835	6.58e-07
	AFUB_086690			159.97	84.7646	59.5893	101.441	3.82855	4.57593	5.11072	4.50507	-4.49145	5.28e-27
	AFUB_086700			34.03	9.10293	0	14.3777	0	0.0473931	0.110905	0.0527661	-8.09206	0.00134423
	AFUB_086710			161.754	42.5629	0	68.1057	0.459875	0	1.09623	0.518701	-7.05888	0.00612741
	AFUB_086720			62.2867	10.7913	0	24.3593	0	0	0	0	-8.77084	0.0248241
11	AFUB_086360	Cluster 25 (Fumitremorgin B)	NRPS	13.9301	21.0686	48.7767	27.9252	7.45655	7.92249	9.85474	8.41126	-1.72253	1.83e-05
	AFUB_086350			125.804	106.31	112.227	114.78	26.6572	23.8502	35.7268	28.7447	-1.99877	2.18e-14
	AFUB_086340			312.997	302.103	330.007	315.036	50.1688	75.779	87.216	71.0546	-2.14472	2.01e-15
	AFUB_086330			155.3	133.835	159.3	149.478	19.9803	28.1739	26.1152	24.7565	-2.58719	2.9e-23
	AFUB_086320			77.0149	70.9076	84.1794	77.3673	6.14069	2.74422	3.58864	4.15785	-4.23268	1.12e-35
	AFUB_086310			399.788	336.235	439.368	391.797	23.2379	16.0236	19.4302	19.5639	-4.32662	4.34e-58
	AFUB_086300			22.0413	23.9153	44.4656	30.1407	5.99477	6.90673	5.71601	6.20584	-2.26973	2.64e-09
	AFUB_086290			96.0977	95.2765	187.147	126.174	21.9515	19.6776	17.4423	19.6905	-2.67283	5.71e-16
	AFUB_086280			1.59462	0.625924	2.01059	1.41038	0.524601	0.624601	0.438491	0.529231	-1.94712	0.0607946
12	AFUB_071550	Cluster 34 (Fmihopaside)	Terpene	184.602	193.805	167.678	182.028	1.13009	0.805812	0.538768	0.824889	-7.79191	1.45e-78
	AFUB_071560			896.324	888.798	727.647	837.59	6.15275	2.84126	2.93332	3.97578	-7.73608	5.56e-121
	AFUB_071569			923.53	970.309	1089.43	994.424	2.66305	2.6042	3.80883	3.02536	-8.36315	1.84e-137
	AFUB_071570			29.0357	29.2528	25.9931	28.0939	2.5121	1.59223	1.33071	1.81168	-3.96509	1.87e-17
13	AFUB_086790	Cluster 36	Terpene	11.8882	11.765	11.5555	11.7362	4.65441	4.7412	5.70597	5.03386	-1.22057	0.000760706
	AFUB_086800			19.6445	15.5608	10.3539	15.1864	4.08312	3.10558	1.81685	3.00185	-2.34059	2.45e-08
	AFUB_086810			427.179	367.395	347.335	380.637	97.1843	86.5864	95.3254	93.032	-2.0326	2.13e-19
	AFUB_086820			0.196727	0.20592	0	0.134216	0	0	0	0	-2.39803	0.475159
	AFUB_086830			1.68624	0	0	0.562079	0	0.17613	0	0.0587099	-2.98436	0.206378
	AFUB_086840			79.4201	93.7296	65.7478	79.6325	19.9537	13.881	26.2185	20.0177	-1.99952	2.76e-10
	AFUB_086850			0	1.6445	1.26779	0.970764	0	0	0	0	-4.56816	0.0240293
	AFUB_086880			0	1.22487	0	0.40829	0	0.733368	0.858081	0.530483	0.33229	0.909524
	AFUB_086890			13.7408	11.3319	8.82009	11.2976	7.04484	5.21906	5.49593	5.91994	-0.936904	0.0443012
	AFUB_086900			21.0159	13.7036	9.73045	14.8167	12.1879	8.20479	11.1159	10.5028	-0.50298	0.228142
	AFUB_086910			724.108	492.307	114.483	443.633	222.749	102.995	122.84	149.528	-1.57845	0.00155721
14	AFUB_045650	Cluster 39	PKS-NRPS	323.866	373.783	296.568	331.406	4.76477	8.11878	9.0864	7.32332	-5.49037	5.44e-62
	AFUB_045660			1.34398	2.81356	1.35566	1.83773	0	0.842284	1.47828	0.773521	-1.23509	0.375495
	AFUB_045670			0.274503	0.430996	0.138444	0.281314	0.73887	0	0.100644	0.279838	-0.0450093	0.975699
	AFUB_045680			6.11952	9.31704	25.813	13.7499	2.99484	4.1838	8.1588	5.11248	-1.42056	0.0269464
	AFUB_045690			88.8869	87.2704	67.4181	81.1918	9.00842	23.7507	24.2528	19.004	-2.08583	1.15e-07
	AFUB_045700			0	0.445407	0	0.148469	0	0	0	0	0	0
	AFUB_045710			0	0	0	0	0	0	0	0	0	0
	AFUB_045720			0.754122	0	1.52135	0.75849	0	0	0	0	-2.93989	0.314021
	AFUB_045730			0	0	0	0	0	0.406065	0	0.135355	1.20556	0.765951
	AFUB_045740			0.390063	0	0.393452	0.261172	0	0	0.572054	0.190685	-0.475506	0.855694
	AFUB_045750			2.01847	2.11279	1.018	1.71642	2.32844	0.948744	1.85014	1.70911	-0.0226146	0.982167
	AFUB_045760			3.64059	9.79896	8.39365	7.27773	9.99921	4.56318	6.48328	7.01522	-0.0608909	0.918256
	AFUB_045770			19.8078	16.4648	29.0884	21.787	16.3532	6.38943	14.3112	12.3513	-0.824775	0.0442791
	AFUB_045780			39.4544	47.1977	77.9362	54.8628	32.3289	14.2766	31.5144	26.04	-1.07713	0.00394647
	AFUB_045790			37.6513	34.1417	35.1309	35.6413	6.69614	2.11025	4.78857	4.53165	-2.98297	5.96e-17
	AFUB_045800			233.532	205.207	205.03	214.589	10.0273	5.98267	10.244	8.75133	-4.62475	3.46e-60

## Sheet: Co-regulation
Supplementary Table 4 - RNA-seq data for regulated BGCs in A. fumigatus.
Co-regulation
No.	Gene ID	Cluster Number	Type	A. fumigatus WT_1_fpkm	A. fumigatus WT_2_fpkm	A. fumigatus WT_3_fpkm	A. fumigatus WT_mean	ΔcsdA_1_fpkm	ΔcsdA_2_fpkm	ΔcsdA_3_fpkm	ΔcsdA_mean	Log2foldchange	p value	ΔlaeB_1_fpkm	ΔlaeB_2_fpkm	ΔlaeB_3_fpkm	ΔlaeB_mean	Log2foldchange	p value
1	AFUB_078030	Cluster 22 (Fumiquizoline)	NRPS	10.9101	10.8887	3.58299	8.46061	10.5723	9.78488	7.72236	9.35985	0.157389	0.74377	1.36587	1.11307	1.48841	1.32245	-2.68733	6.95e-06
	AFUB_078040			1.87069	0.489526	0.353802	0.904673	4.37215	2.97182	3.6632	3.66906	2.02829	0.00131362	6.02433	6.96099	11.5741	8.18648	3.17055	1.01e-08
	AFUB_078050			1.29587	2.71284	0.326781	1.44516	3.80748	4.25925	4.06012	4.04229	1.50194	0.0522628	7.72349	14.0093	18.2921	13.3416	3.21391	5.48e-07
	AFUB_078060			0.272574	0.570622	0	0.281065	8.73677	8.1228	10.4921	9.11724	5.04544	1.24e-07	8.5945	17.7658	14.7907	13.717	5.63157	2.63e-09
	AFUB_078070			3.1911	2.22681	2.42277	2.61356	1.57642	1.14284	1.04435	1.25454	-1.05417	0.0028023	5.30403	3.41917	5.8877	4.8703	0.894214	0.00556052
2	AFUB_100680	Cluster 14 (Endocrocin)	PKS	0	0	0.403898	0.134633	0	1.05288	0.716895	0.589924	2.04171	0.369375	0.61588	0	0.293621	0.303167	1.02402	0.698387
	AFUB_100690			0	0	0	0	0.127555	0.313919	0.213744	0.218406	3.30497	0.128719	0.27544	0.149641	0.262632	0.229237	3.35097	0.107353
	AFUB_100710			6.42566	4.20369	0	3.54312	8.58168	4.22397	1.43803	4.74789	0.426549	0.699451	1.2354	1.51013	4.71183	2.48579	-0.525129	0.644866
	AFUB_100720			1.21198	2.53723	1.83377	1.86099	4.20847	3.98354	8.13707	5.44303	1.56186	0.0170001	4.89336	3.41802	5.77672	4.69603	1.33267	0.0374016
	AFUB_100730			0.381941	2.53723	0.693468	1.20421	2.87715	2.73648	2.0941	2.56924	1.32656	0.0479807	5.58087	2.96814	4.76122	4.43674	3.16918	9.52e-10
	AFUB_100740			0	0.899271	0.433295	0.444189	2.75374	0.376504	1.53815	1.55613	1.8093	0.21497	4.2946	5.38422	5.66985	5.11622	3.5454	0.000939601
	AFUB_100750			4.47501	0	0	1.49167	2.39061	2.61484	12.6855	5.89698	1.99684	0.132278	13.7659	15.4249	19.1418	16.1109	3.4171	6.99e-05
	AFUB_100760			0	0.420369	0	0.140123	10.298	5.27996	6.47114	7.34971	5.65221	2.32e-05	3.08851	7.55065	10.3071	6.9821	5.57942	3.9e-05
	AFUB_100770			41.8957	49.1158	59.1636	50.0583	46.553	30.8454	22.5025	33.3003	-0.589374	0.204346	16.7542	48.3117	44.2388	36.4349	-0.444566	0.359387
3	AFUB_075680	Cluster 21 (Gliotoxin)	NRPS	0.811207	1.13215	0.409128	0.784162	1.87788	1.42201	1.33132	1.54374	0.977207	0.0476325	1.87156	1.77937	0.991408	1.54745	0.980667	0.0939511
	AFUB_075690			0.665402	0.696494	0	0.453965	0.710933	0.583212	0.578275	0.62414	0.459287	0.502659	1.15117	1.25104	1.48793	1.29671	1.51421	0.0273716
	AFUB_075700			0	1.26861	2.44502	1.23788	1.29491	1.36228	1.5946	1.41726	0.195238	0.813447	3.72828	3.27868	2.66618	3.22438	1.38115	0.061372
	AFUB_075710			0.0635496	0	0	0.0211832	0.0678981	0.1671	0.113777	0.116258	2.45634	0.0559513	0.146618	0.199135	0.1864	0.177384	3.06588	0.00410714
	AFUB_075720			0	0.291158	0.84173	0.377629	1.48316	0.487603	0.649003	0.873256	1.20943	0.277952	0.641752	1.07163	0.871626	0.861668	1.19016	0.154668
	AFUB_075730			0	0	0	0	0	0.275406	0	0.0918018	0	0.373901	0	0	0	0	0	0
	AFUB_075740			0	0	0.329138	0.109713	0.348631	0.285998	0.2921	0.30891	1.49345	0.148578	0.250942	0.304497	0.65709	0.404176	1.88125	0.15476
	AFUB_075750			0	0	0	0	0	0	0	0	0	0	0	0	0	0	0	0
	AFUB_075760			1.02576	3.75791	5.17335	3.31901	7.67163	8.7658	7.11635	7.85126	1.24217	0.0258333	4.53591	4.33925	3.9489	4.27469	0.365067	0.480366
	AFUB_075770			3.35758	3.51447	0.483821	2.45195	1.02495	5.46529	3.86439	3.45154	0.49331	0.572814	4.79538	4.50905	7.38617	5.56353	1.18207	0.0816511
	AFUB_075780			76.8038	75.7657	70.783	74.4508	158.215	118.168	125.636	134.006	0.847939	0.00871456	57.7908	91.7655	84.6811	78.0791	0.0686489	0.747403
	AFUB_075790			58.9324	39.4922	43.0893	47.1713	88.2842	75.7032	82.9009	82.2961	0.802915	0.00738081	105.99	168.448	139.703	138.047	1.54918	0.00877463
4	AFUB_045610	Cluster 8	NRPS-like	6.6465	5.88676	1.41821	4.65049	2.32158	1.56841	1.83071	1.9069	-1.27699	0.0315395	3.04722	1.60208	2.24943	2.29958	-1.0289	0.0635873
	AFUB_045600			1.45334	0.6085	0.293194	0.785011	0.931673	2.29288	0.780601	1.33505	0.787247	0.464301	1.11768	0.910821	1.06571	1.03141	0.386777	0.717915
	AFUB_045595			0	1.0296	0.496092	0.508564	5.7802	2.58642	0.880533	3.08238	2.60699	0.0481262	2.26938	3.08227	1.44257	2.26474	2.17692	0.0928074
	AFUB_045590			0	0	0	0	1.51073	3.71797	3.7973	3.00867	3.52296	0.0901062	6.52448	7.97538	2.0737	5.52452	4.39391	0.0111922
	AFUB_045580			0.662156	2.31032	0.222636	1.06504	7.5463	4.25602	3.75408	5.18547	2.29736	0.00214141	51.0925	27.2503	42.8901	40.411	5.25295	2.13e-22
	AFUB_045570			0	0	0	0	2.47613	0	2.07462	1.51692	4.61406	0.0201067	4.07382	2.90485	4.85548	3.94472	5.98721	1.53e-05
	AFUB_045560			0	0	0.236888	0.0789627	2.00734	1.64672	0.420462	1.35817	3.99102	0.0121647	7.22434	5.74006	4.82188	5.92876	6.11338	2.08e-06
	AFUB_045550			4.35536	4.55887	5.1254	4.67988	1.55113	4.45362	6.49805	4.1676	-0.141376	0.861671	1.11649	5.00416	2.66143	2.92736	-0.646331	0.450974
	AFUB_045540			0.873875	0.548826	0.352587	0.591763	0.186734	0.306374	0.312911	0.268673	-1.1145	0.357347	1.3441	0.547665	0.512639	0.801468	0.423737	0.662643
	AFUB_045530			0.316907	0.221144	0.319661	0.285904	0.225728	0.555526	0.0945631	0.291939	0.0497384	0.966017	0.487432	0.0662029	0.387305	0.313647	0.108053	0.92468
5	AFUB_057720	Cluster 17	NRPS-like	50.1447	54.7166	62.1784	55.6799	10.9199	9.33139	10.1023	10.1179	-2.45347	1.11e-23	25.1359	31.7597	22.9522	26.6159	-1.05873	3e-05
	AFUB_057730			0	0	0.530703	0.176901	0	0	0	0	0	0	0	0.329731	0	0.10991	-0.524639	0.88722
	AFUB_057740			6.35388	0	1.16529	2.50639	0	1.51883	0	0.506277	-2.24741	0.211688	0	0	0	0	-5.05639	0.179819
	AFUB_057750			0	0.9108	0	0.3036	0	0	0	0	0	0	0	0	0.63806	0.212687	-0.52464	0.88342
	AFUB_057760			0	0	0.894911	0.298304	0.947911	1.55523	0	0.834381	1.48315	0.474785	0	0	0	0	-2.35029	0.538312
	AFUB_057770			3.15679	1.10143	0	1.41941	1.87378	4.91887	2.8259	3.20618	1.19702	0.22427	0.269746	0.439642	1.28601	0.665134	-1.10563	0.388979
	AFUB_057780			0.900942	0.314347	0	0.405096	0	0	0.268835	0.0896118	-1.98073	0.407213	0.230955	1.31747	0.660646	0.736356	0.880559	0.547911
	AFUB_057790			8.75755	4.07412	3.4353	5.42232	8.31715	7.24938	3.48426	6.35027	0.234383	0.718652	5.61246	5.48843	8.56236	6.55442	0.268847	0.65663
	AFUB_057800			0.353495	0.370013	0.713132	0.47888	0	0.309831	0	0.103277	-1.99721	0.351835	1.08741	0.221538	1.81448	1.04115	1.10226	0.416689
	AFUB_057810			0.952575	0	1.44128	0.797951	0.508879	0.417457	0	0.308778	-1.38738	0.474977	0	0.596987	0.698508	0.431832	-0.858628	0.623719
	AFUB_057820			1.93365	0.4048	0.780179	1.03954	0	0	1.03858	0.346193	-1.54583	0.358239	0.594825	0	1.13433	0.576385	-0.885422	0.528527
	AFUB_057830			39.4805	36.2177	14.766	30.1547	15.1666	21.3844	20.2523	18.9344	-0.656111	0.130603	9.55218	1.94606	7.48157	6.3266	-2.27723	2.52e-05
	AFUB_057840			50.1795	58.5848	56.4557	55.0733	48.8017	49.62	37.4331	45.2849	-0.274013	0.360985	32.1586	25.4002	39.6263	32.395	-0.768943	0.0165495
	AFUB_057850			661.238	694.246	475.836	610.44	272.111	172.573	194.301	212.995	-1.5095	1.39e-07	71.8339	82.5438	132.06	95.4791	-2.67974	1.61e-18
6	AFUB_044980	Cluster 9 (Fusarinine C, triacetylfusarinine C)	NRPS	12.4951	11.2954	2.86446	8.885	10.9228	23.3968	26.9465	20.422	1.21779	0.0392674	12.23	8.54266	5.83064	8.86777	-0.00816631	0.989306
	AFUB_044970			1240.88	931.537	269.332	813.917	1572.01	2109.04	2153.1	1944.72	1.27091	0.00602402	872.561	303.023	736.885	637.49	-0.364326	0.444698
	AFUB_044960			262.682	203.186	58.8809	174.916	146.02	311.041	280.767	245.943	0.505847	0.306679	4.63171	5.22618	6.11493	5.32427	-5.04215	5.16e-25
	AFUB_044950			1.06325	1.29843	1.25124	1.20431	0.757339	0.62128	0.158634	0.512418	-1.24071	0.175768	3.40704	0	0.909611	1.43888	0.233848	0.814503
	AFUB_044940			0	0	0.478746	0.159582	1.5213	0.831994	0	0.784431	2.17602	0.331717	1.82503	2.3796	1.0441	1.74958	3.34747	0.043635
	AFUB_044930			1.34066	3.50827	2.70462	2.51785	2.5067	1.46883	2.7003	2.22528	-0.173978	0.817885	1.28879	1.68041	1.96617	1.64512	-0.608164	0.433044
	AFUB_044920			500.07	491.684	494.524	495.426	140.12	114.678	128.371	127.723	-1.94688	3e-21	14.3745	12.8662	23.143	16.7946	-4.88617	6.13e-69
	AFUB_044910			285.423	306.403	259.782	283.87	43.6155	45.0884	51.3982	46.7007	-2.59357	1.13e-30	24.2475	16.4317	25.797	22.1587	-3.68546	3.16e-43
	AFUB_044900			14.2819	12.9964	20.3111	15.8631	3.1618	3.55234	3.62813	3.44742	-2.19251	6.97e-13	8.16333	3.58829	4.05697	5.26953	-1.59176	8.7e-06
	AFUB_044890			198.169	281.89	255.538	245.199	71.3518	61.7144	72.1284	68.3982	-1.83494	1.14e-11	434.314	411.706	452.975	432.998	0.820914	0.000789957
	AFUB_044880			0	0	0	0	0	0	0	0	0	0	0	0	0	0	0	0
	AFUB_044870			1.25687	1.9734	0	1.07676	0.671437	0	1.12513	0.598854	-0.84087	0.643483	7.24942	10.24	5.06903	7.51948	2.81863	0.00297293
	AFUB_044860			11.4712	5.20311	6.5568	7.74369	6.53658	8.37853	8.89959	7.93823	0.0498031	0.920241	5.58716	7.42871	8.692	7.23596	-0.0953401	0.848918
	AFUB_044850			21.4021	7.97885	5.6188	11.6666	5.01185	4.11145	14.4347	7.85266	-0.554945	0.383657	9.69513	3.67476	10.9642	8.11135	-0.536996	0.334546
	AFUB_044840			15.5277	14.6804	4.5472	11.5851	13.9144	16.2438	17.4872	15.8818	0.469678	0.354507	8.08939	4.70871	9.54971	7.44927	-0.650113	0.249298
	AFUB_044830			6.31812	2.31808	1.90534	3.51385	2.92288	2.7974	1.92416	2.54815	-0.449305	0.37371	1.2523	0.693955	1.05078	0.999011	-1.82419	0.000433935
	AFUB_044820			4.1259	1.51154	0.728305	2.12191	1.43267	2.62179	2.77007	2.27484	0.119888	0.851851	1.9038	1.61608	3.47927	2.33305	0.128363	0.832821
	AFUB_044810			38.5244	18.5019	10.5148	22.5137	34.8654	41.5122	39.5579	38.6452	0.794968	0.0688004	27.5357	21.5872	32.9022	27.3417	0.275274	0.517229
	AFUB_044800			76.4895	36.085	20.1035	44.226	41.4373	33.5208	26.5208	33.8263	-0.372397	0.438838	33.5545	21.2677	31.5992	28.8071	-0.625301	0.169166
	AFUB_044790			1.05023	0.824477	0	0.624902	0.561046	1.15063	1.41022	1.04063	0.760403	0.517433	0.403836	0.987281	0.577586	0.656234	0.0837665	0.947045
	AFUB_044780			0	0	0	0	0	0	0	0	0	0	0.463963	0.756184	0	0.406716	0	0.575753
	AFUB_044770			9.15114	2.39469	0.769221	4.10502	0	2.6736	1.36532	1.34631	-1.55629	0.229763	4.10529	0.477925	1.6776	2.08694	1.8679	0.367948
	AFUB_044760			0	0	0	0	0.622448	0.255312	0.521518	0.466426	3.09832	0.172926	0	0	0	0	-1.00937	0
	AFUB_044750			1.67583	0.584711	1.69039	1.31698	0	0.48961	0.500056	0.329889	-1.93846	0.249067	1.28879	0.70017	0.819238	0.936065	-0.502351	0.694251
	AFUB_044740			1.02835	0	1.03728	0.688544	1.09872	2.70398	1.84112	1.88127	1.46196	0.401713	0.790846	0	2.26221	1.01769	0.53664	0.802671
	AFUB_044730			1.53961	1.34296	0.517661	1.13341	0.27416	0	0.229704	0.167955	-2.78586	0.0588156	0.789351	0.482442	0.564484	0.612093	-0.900259	0.377801
	AFUB_044720			0.780126	1.63316	0.393452	0.935579	1.66702	0.683765	2.09506	1.48195	0.672749	0.548585	1.1999	0	1.43014	0.87668	-0.125922	0.925578
	AFUB_044710			3.03673	3.4965	5.81992	4.11772	2.92007	4.52478	5.16501	4.20329	0.0438002	0.939038	3.73662	2.47409	3.78554	3.33208	-0.309164	0.592993
	AFUB_044700			0	1.44249	0	0.480829	0.736195	0	0.61682	0.451005	-0.0963408	0.969821	0	0	0.505266	0.168422	-1.46901	0.629695
	AFUB_044690			3.51924	2.28037	1.52135	2.44032	0.17905	2.20324	1.8002	1.39417	-0.775864	0.309324	2.06206	2.31056	0.8602	1.74427	-0.476811	0.441453
	AFUB_044680			169.012	143.478	101.349	137.946	26.3045	96.8131	109.005	77.3742	-0.821287	0.0833646	139.189	51.7096	73.1893	88.0293	-0.655937	0.0837298
	AFUB_044670			153.67	96.9573	74.4887	108.372	12.77	37.4136	31.7158	27.2998	-1.97144	5.53e-06	73.8621	24.8792	38.8133	45.8515	-1.24922	0.00219643
	AFUB_044660			174.292	118.852	30.8721	108.005	105.84	137.2	130.716	124.585	0.221434	0.655472	22.1001	7.90674	25.0128	18.3399	-2.57227	7.72e-07
	AFUB_044650			525.843	415.183	134.635	358.554	151.219	157.824	158.712	155.918	-1.18725	0.00577503	65.0753	14.9939	38.9655	39.6782	-3.18972	1.54e-10
	AFUB_044640			705.418	541.825	140.532	462.591	381.845	427.876	456.231	421.984	-0.118049	0.803589	119.426	49.3513	91.4613	86.7462	-2.42625	3.15e-07
	AFUB_044630			3.70403	2.05259	1.09889	2.28517	0.232794	4.77429	2.5356	2.51423	0.164228	0.849993	0	0.2731	0.159771	0.14429	-3.91944	0.00069417
	AFUB_044620			30.8504	19.8365	1.33365	17.3402	11.7719	35.1518	25.2496	24.0578	0.490836	0.514823	12.5406	10.7719	10.6647	11.3257	-0.621846	0.352704
	AFUB_044610			439.642	381.721	399.729	407.03	457.603	539.117	513.259	503.327	0.316462	0.120905	462.44	604.129	617.429	561.332	0.466684	0.0468813
7	AFUB_009720	Cluster 1 (Fumiganins)	NRPS	26.9941	36.934	52.318	38.7487	37.0816	27.3778	32.6223	32.3606	-0.254387	0.436717	52.1959	72.8659	70.5528	65.2049	0.757428	0.0137399
	AFUB_009730			12.699	10.7776	14.3672	12.6146	12.2845	13.9882	10.5998	12.2908	-0.0281404	0.927562	15.0451	20.3266	14.4713	16.6143	0.405191	0.193688
	AFUB_009740			11.5998	13.6918	12.1984	12.4967	20.5679	15.7913	17.2328	17.864	0.522433	0.0985165	24.6744	35.111	21.7173	27.1675	1.12762	0.000694395
	AFUB_009750			151.64	208.007	283.094	214.247	732.991	372.467	369.467	491.642	1.20544	0.00124076	427.912	360.209	500.826	429.649	1.00601	0.000481045
	AFUB_009760			1770.82	1766.88	1157.61	1565.1	956.923	1331.78	1240.43	1176.38	-0.401258	0.137602	565.663	350.866	555.552	490.694	-1.6787	5.06e-09
	AFUB_009770			245.628	289.244	327.633	287.502	490.341	420.662	435.424	448.809	0.650196	0.00934309	213.754	421.302	363.786	332.947	0.21907	0.491046
	AFUB_009780			44.1255	42.8603	41.1141	42.7	49.9416	39.6584	32.1358	40.5786	-0.0648182	0.808368	47.307	26.0133	32.3565	35.2256	-0.280988	0.333597
	AFUB_009790			246.517	214.396	158.682	206.532	134.671	135.759	153.845	141.425	-0.535224	0.0326131	45.485	16.2546	36.4378	32.7258	-2.66709	1.04e-13
	AFUB_009800			89.5204	90.2137	107.113	95.6157	32.1519	28.8994	27.3842	29.4785	-1.68883	1.69e-15	22.5059	25.8604	26.0353	24.8005	-1.6027	2.35e-09
	AFUB_009810			204.311	112.382	46.8292	121.174	22.0677	68.2538	71.0426	53.788	-1.15668	0.0305104	39.3526	41.5733	47.3468	42.7575	-1.50613	0.00029652
	AFUB_009820			3.20244	3.67647	6.14792	4.34227	1.87634	2.35415	1.84952	2.02667	-1.08997	0.0145756	7.4679	9.25807	8.25691	8.32763	0.946834	0.0080002
	AFUB_009830			39.6724	43.5618	41.1941	41.4761	66.4896	53.1809	56.7528	58.8077	0.511546	0.0497865	45.1666	37.5383	39.6438	40.7829	-0.024545	0.928477
	AFUB_009840			13.2431	2.31032	6.67909	7.41084	9.43287	12.091	14.3248	11.9495	0.702101	0.258251	2.9705	4.4956	4.04624	3.83745	-0.941014	0.182859
8	AFUB_086360	Cluster 25 (Fumitremorgin B)	NRPS	13.9301	21.0686	48.7767	27.9252	4.13061	3.1196	3.07629	3.44217	-3.01764	4.39e-11	7.45655	7.92249	9.85474	8.41126	-1.72253	1.83e-05
	AFUB_086350			125.804	106.31	112.227	114.78	37.2935	54.8136	51.2093	47.7721	-1.25283	8.36e-07	26.6572	23.8502	35.7268	28.7447	-1.99877	2.18e-14
	AFUB_086340			312.997	302.103	330.007	315.036	78.4995	79.9906	72.2593	76.9165	-2.02494	2.72e-22	50.1688	75.779	87.216	71.0546	-2.14472	2.01e-15
	AFUB_086330			155.3	133.835	159.3	149.478	21.5206	15.0958	19.599	18.7385	-2.99035	8.78e-30	19.9803	28.1739	26.1152	24.7565	-2.58719	2.9e-23
	AFUB_086320			77.0149	70.9076	84.1794	77.3673	9.3568	6.77278	11.99	9.37318	-3.03758	3.79e-23	6.14069	2.74422	3.58864	4.15785	-4.23268	1.12e-35
	AFUB_086310			399.788	336.235	439.368	391.797	96.8525	28.5214	39.1174	54.8304	-2.83067	3.93e-11	23.2379	16.0236	19.4302	19.5639	-4.32662	4.34e-58
	AFUB_086300			22.0413	23.9153	44.4656	30.1407	14.0723	9.42378	6.97801	10.158	-1.56791	0.000216843	5.99477	6.90673	5.71601	6.20584	-2.26973	2.64e-09
	AFUB_086290			96.0977	95.2765	187.147	126.174	42.357	9.72928	9.93686	20.6744	-2.60687	2.6e-06	21.9515	19.6776	17.4423	19.6905	-2.67283	5.71e-16
	AFUB_086280			1.59462	0.625924	2.01059	1.41038	0.916701	0.873533	0.89217	0.894135	-0.209956	0.794686	0.524601	0.624601	0.438491	0.529231	-1.94712	0.0607946
9	AFUB_060340	Cluster 18	NRPS	23.219	24.9272	28.9757	25.7073	20.3551	19.1769	16.9213	18.8178	-0.442347	0.0884391	32.3935	25.9316	22.9198	27.0816	0.0770472	0.774775
	AFUB_060350			126.543	61.0613	4.97896	64.1944	17.2598	100.096	113.681	77.0123	0.279649	0.820666	26.5724	36.9811	25.0077	29.5204	-1.1229	0.295699
	AFUB_060360			0	0	0	0	1.4503	0	1.21514	0.88848	1.80301	0.612787	0	0	0	0	0	0
	AFUB_060370			0.906155	0	0.548417	0.484857	0.387264	0.317691	0.648938	0.451298	-0.0942528	0.941261	0.696874	0.681474	0.132894	0.503747	0.064021	0.959223
	AFUB_060380			28.3512	32.8234	35.5302	32.2349	14.6866	19.9547	27.3021	20.6478	-0.629934	0.0745763	22.7944	13.999	21.7344	19.5093	-0.729482	0.0309544
	AFUB_060390			20.3099	16.146	22.3016	19.5858	3.29615	5.40796	6.90418	5.20276	-1.89301	1.78e-06	5.33821	3.70573	4.14739	4.39711	-2.15888	6.01e-09
	AFUB_060400			16.2016	16.6663	14.2043	15.6907	4.45923	4.30621	4.13332	4.29959	-1.85808	1.3e-18	4.90304	3.51157	4.01234	4.14232	-1.92368	2.29e-15
10	AFUB_071710	Cluster 15 (Trypacidin)	PKS	1.27258	0.88803	3.42303	1.86122	0.45322	1.85899	0	0.770736	-1.24664	0.334513	0	2.12677	1.55527	1.22735	-0.565681	0.617383
	AFUB_071720			2.51374	0.877067	0	1.13027	2.68575	0	3.00034	1.89536	0.747736	0.653264	2.57757	1.57538	5.52986	3.2276	1.4958	0.253006
	AFUB_071730			0.949245	0	1.91498	0.954743	2.0284	0	1.69949	1.24263	0.361825	0.848202	0.730012	0.5949	0	0.441637	-1.09699	0.622011
	AFUB_071740			0	0	0.448923	0.149641	1.18877	0.585124	0.398405	0.724101	2.26014	0.167711	0	0.41838	0	0.13946	-0.0295452	0.991328
	AFUB_071750			0	0.637152	0.920996	0.519383	0.32518	0.266761	0.272452	0.288131	-0.84974	0.615012	0.234062	0	0.446356	0.226806	-1.22478	0.50354
	AFUB_071760			0.959307	1.00413	0.483821	0.815754	6.66217	2.10204	3.00564	3.92328	2.26454	0.0280983	15.1239	4.20844	8.79306	9.37513	3.51256	8.84e-05
	AFUB_071770			2.0567	0.5382	1.03728	1.21073	2.74679	0.901327	0.460279	1.36946	0.158392	0.899705	3.16339	0.644475	3.77036	2.52607	1.03863	0.341062
	AFUB_071780			0	0	2.06934	0.68978	1.46126	1.19874	0.612159	1.09072	0.653972	0.659076	0	0.214284	0.501448	0.238577	-1.50916	0.447817
	AFUB_071790			5.57844	5.51471	14.6925	8.59521	2.64896	8.69225	10.8197	7.38697	-0.206769	0.737976	3.57506	1.74803	2.72705	2.68338	-1.68485	0.00355841
	AFUB_071800			4.59746	5.70949	15.6414	8.64946	3.41346	2.86852	3.20874	3.16357	-1.44781	0.00303615	2.21728	1.70923	1.59991	1.84214	-2.22347	1.65e-06
	AFUB_071810			7.18883	8.41001	14.9291	10.176	8.13254	5.93023	6.81385	6.95887	-0.546484	0.279606	3.57729	2.12014	4.65128	3.44957	-1.56864	0.0053213
	AFUB_071820			7.30702	10.296	23.5289	13.7107	6.30567	2.70958	2.01265	3.67597	-1.90934	0.00165944	3.89037	1.93743	2.06082	2.62954	-2.38576	1.11e-05
11	AFUB_045650	Cluster 39	PKS-NRPS	323.866	373.783	296.568	331.406	151.048	113.051	118.993	127.697	-1.36774	3.13e-08	4.76477	8.11878	9.0864	7.32332	-5.49037	5.44e-62
	AFUB_045660			1.34398	2.81356	1.35566	1.83773	0	0	0	0	-3.96891	0.0397197	0	0.842284	1.47828	0.773521	-1.23509	0.375495
	AFUB_045670			0.274503	0.430996	0.138444	0.281314	1.61308	0	0.491461	0.701513	1.31189	0.321535	0.73887	0	0.100644	0.279838	-0.0450093	0.975699
	AFUB_045680			6.11952	9.31704	25.813	13.7499	19.0204	5.85124	5.47807	10.1166	-0.449122	0.52112	2.99484	4.1838	8.1588	5.11248	-1.42056	0.0269464
	AFUB_045690			88.8869	87.2704	67.4181	81.1918	38.2821	50.1266	32.6915	40.3667	-0.995834	0.00162759	9.00842	23.7507	24.2528	19.004	-2.08583	1.15e-07
	AFUB_045700			0	0.445407	0	0.148469	0	0	0	0	0	NA	0	0	0	0	0	0
	AFUB_045710			0	0	0	0	0	0	0	0	0	NA	0	0	0	0	0	0
	AFUB_045720			0.754122	0	1.52135	0.75849	0	0	2.02523	0.675076	-0.148682	0.947673	0	0	0	0	-2.93989	0.314021
	AFUB_045730			0	0	0	0	0.692269	0	0	0.230756	1.91845	0.633571	0	0.406065	0	0.135355	1.20556	0.765951
	AFUB_045740			0.390063	0	0.393452	0.261172	0.416754	0.683765	0.349177	0.483232	0.894779	0.637029	0	0	0.572054	0.190685	-0.475506	0.855694
	AFUB_045750			2.01847	2.11279	1.018	1.71642	3.23488	6.19202	2.25862	3.89517	1.20074	0.172175	2.32844	0.948744	1.85014	1.70911	-0.0226146	0.982167
	AFUB_045760			3.64059	9.79896	8.39365	7.27773	13.3361	10.0286	13.0359	12.1335	0.74418	0.159888	9.99921	4.56318	6.48328	7.01522	-0.0608909	0.918256
	AFUB_045770			19.8078	16.4648	29.0884	21.787	17.7398	8.68059	9.38732	11.9359	-0.867558	0.0380942	16.3532	6.38943	14.3112	12.3513	-0.824775	0.0442791
	AFUB_045780			39.4544	47.1977	77.9362	54.8628	39.8959	24.0832	22.2845	28.7545	-0.927341	0.0136659	32.3289	14.2766	31.5144	26.04	-1.07713	0.00394647
	AFUB_045790			37.6513	34.1417	35.1309	35.6413	3.70661	3.72636	3.04469	3.49255	-3.34208	2.31e-48	6.69614	2.11025	4.78857	4.53165	-2.98297	5.96e-17
	AFUB_045800			233.532	205.207	205.03	214.589	17.4136	31.4274	30.2221	26.3544	-3.01181	1.23e-25	10.0273	5.98267	10.244	8.75133	-4.62475	3.46e-60
12	AFUB_071550	Cluster 34 (Fmihopaside)	Terpene	184.602	193.805	167.678	182.028	8.83135	6.43979	6.90605	7.3924	-4.61918	8.98e-69	1.13009	0.805812	0.538768	0.824889	-7.79191	1.45e-78
	AFUB_071560			896.324	888.798	727.647	837.59	89.4686	32.724	36.287	52.8265	-3.9781	4.32e-24	6.15275	2.84126	2.93332	3.97578	-7.73608	5.56e-121
	AFUB_071569			923.53	970.309	1089.43	994.424	46.9869	23.9771	21.0789	30.681	-5.01466	3.29e-50	2.66305	2.6042	3.80883	3.02536	-8.36315	1.84e-137
	AFUB_071570			29.0357	29.2528	25.9931	28.0939	5.04116	3.81739	0	2.95285	-3.25848	1.73e-07	2.5121	1.59223	1.33071	1.81168	-3.96509	1.87e-17
13	AFUB_086670	Cluster 24 (Neosartoricin)	PKS	68.8962	14.5948	2.0683	28.5198	4.81974	17.9721	16.8871	13.2263	-1.08593	0.38722	0	0	0	0	-9.06528	6.81e-05
	AFUB_086680			75.8404	27.5003	3.53345	35.6247	2.99418	27.1724	24.6163	18.261	-0.944985	0.454522	0.673495	0.329306	0.899048	0.633949	-5.82835	6.58e-07
	AFUB_086690			159.97	84.7646	59.5893	101.441	12.4109	44.5066	50.2098	35.7091	-1.49058	0.00373352	3.82855	4.57593	5.11072	4.50507	-4.49145	5.28e-27
	AFUB_086700			34.03	9.10293	0	14.3777	0.323187	3.84432	3.45248	2.54	-2.47951	0.229718	0	0.0473931	0.110905	0.0527661	-8.09206	0.00134423
	AFUB_086710			161.754	42.5629	0	68.1057	4.15285	21.4889	19.5385	15.0601	-2.15556	0.279925	0.459875	0	1.09623	0.518701	-7.05888	0.00612741
	AFUB_086720			62.2867	10.7913	0	24.3593	3.2127	8.65959	10.767	7.54644	-1.66734	0.353265	0	0	0	0	-8.77084	0.0248241
