# Supplementary material for: CsdA-LaeB hub governs Aspergillus fumigatus virulence via FqC biosynthesis
Source: Research Square preprint supplement (doi:10.21203/rs.3.rs-6615529/v1), 2025-06-12
Supplement: Supplementary file 1 [file c20a42e8590c6f6768eced21.pdf]

## Supplementary information

### **CsdA-LaeB hub governs *Aspergillus fumigatus* virulence via FqC biosynthesis**

Zili Song<sup>1,2,8</sup>, Hongjiao Zhang<sup>1,8</sup>, Leixin Ye<sup>1</sup>, Yuxin Lei<sup>1</sup>, Linqi Wang<sup>1</sup>, Xiao Liu<sup>1</sup>, Nayanna M. Mercado Soto<sup>3</sup>, Nancy P. Keller<sup>3</sup>, Berl R. Oakley<sup>4</sup>, Can Zhao<sup>5,6</sup>, Michael Bromley<sup>5</sup>, Hongwei Liu<sup>1</sup>, Lei Cai<sup>1</sup>, Koon Ho Wong<sup>7</sup>, Wen-Bing Yin<sup>1,2 \*</sup>

<sup>1</sup> State Key Laboratory of Microbial Diversity and Innovative Utilization, Institute of Microbiology, Chinese Academy of Sciences; Beijing, 100101, PR, China.

<sup>2</sup> Medical School, University of Chinese Academy of Sciences; Beijing, 100049, PR, China.

<sup>3</sup> Department of Medical Microbiology and Immunology, University of Wisconsin-Madison; Madison, 53706, WI, USA.

<sup>4</sup> Department of Molecular Biosciences, University of Kansas; Lawrence, 66045, KS, USA.

<sup>5</sup> Manchester Fungal Infection Group, Division of Infection, Immunity and Respiratory Medicine, University of Manchester; Manchester, M13 9NT, United Kingdom.

<sup>6</sup> Department of Life Sciences, Manchester Metropolitan University; Manchester, M1 5GD, United Kingdom.

<sup>7</sup> MoE Frontiers Science Center for Precision Oncology, University of Macau; Macau, SAR, China.

<sup>8</sup> These authors contributed equally: Zili Song, Hongjiao Zhang

**\*Corresponding author:** Prof. Dr. Wen-Bing Yin, **Email:** yinwb@im.ac.cn

**ORCID:** 0000-0002-9184-3198

22      **Supplementary Figure 1**

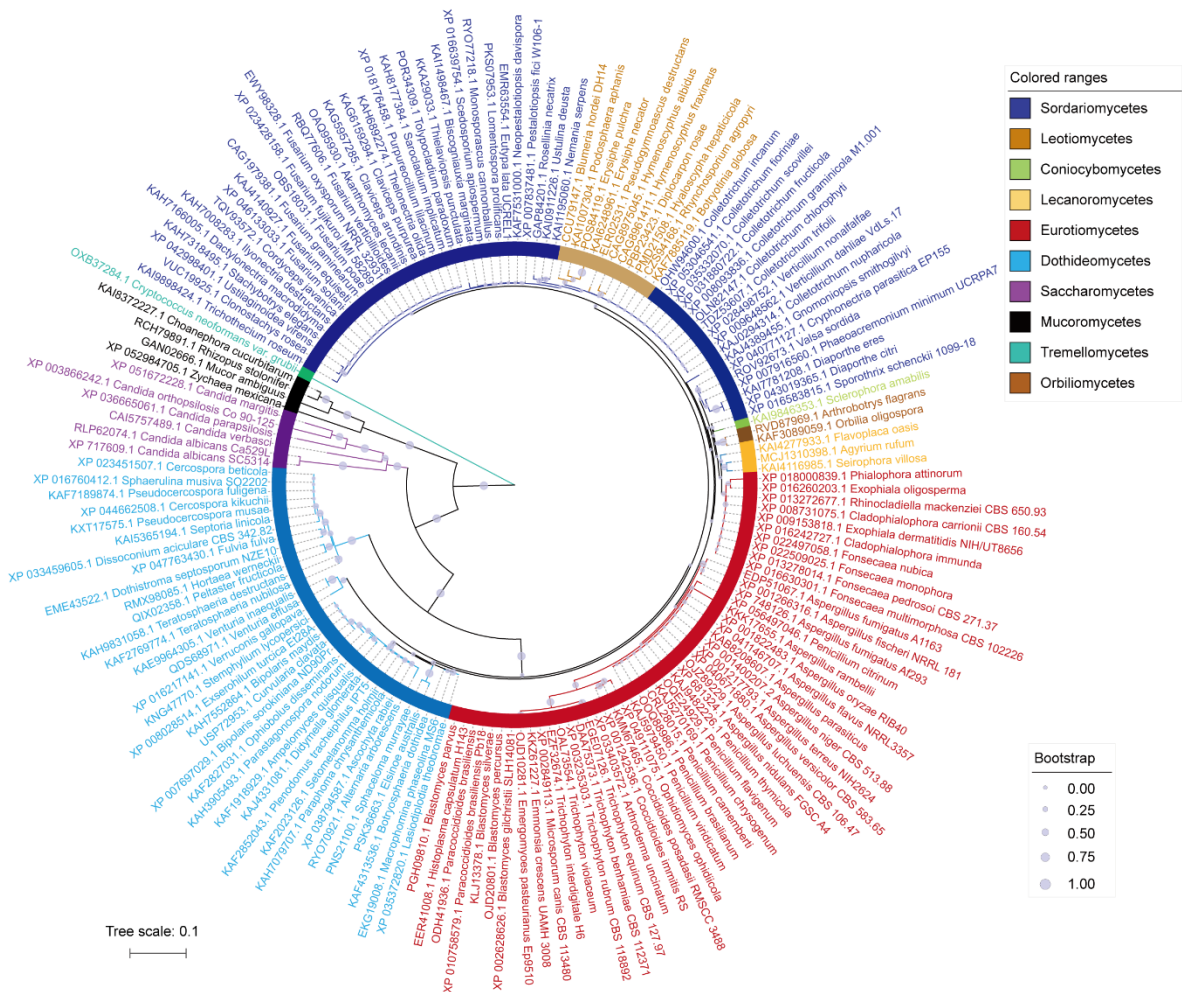

23  
24      **Supplementary Fig. 1 Phylogenetic analysis of CsdA in pathogenic fungi.** Phylogenetic tree of the  
25 RNA binding protein CsdA in pathogenic fungi. Different colored circles represent taxonomic units of  
26 class level. A basidiomycete fungus (*Cryptococcus neoformans* var. *grubii*) was considered as the  
27 outgroup. The homologues had more than 30% identity and more than 70% coverage.  
28

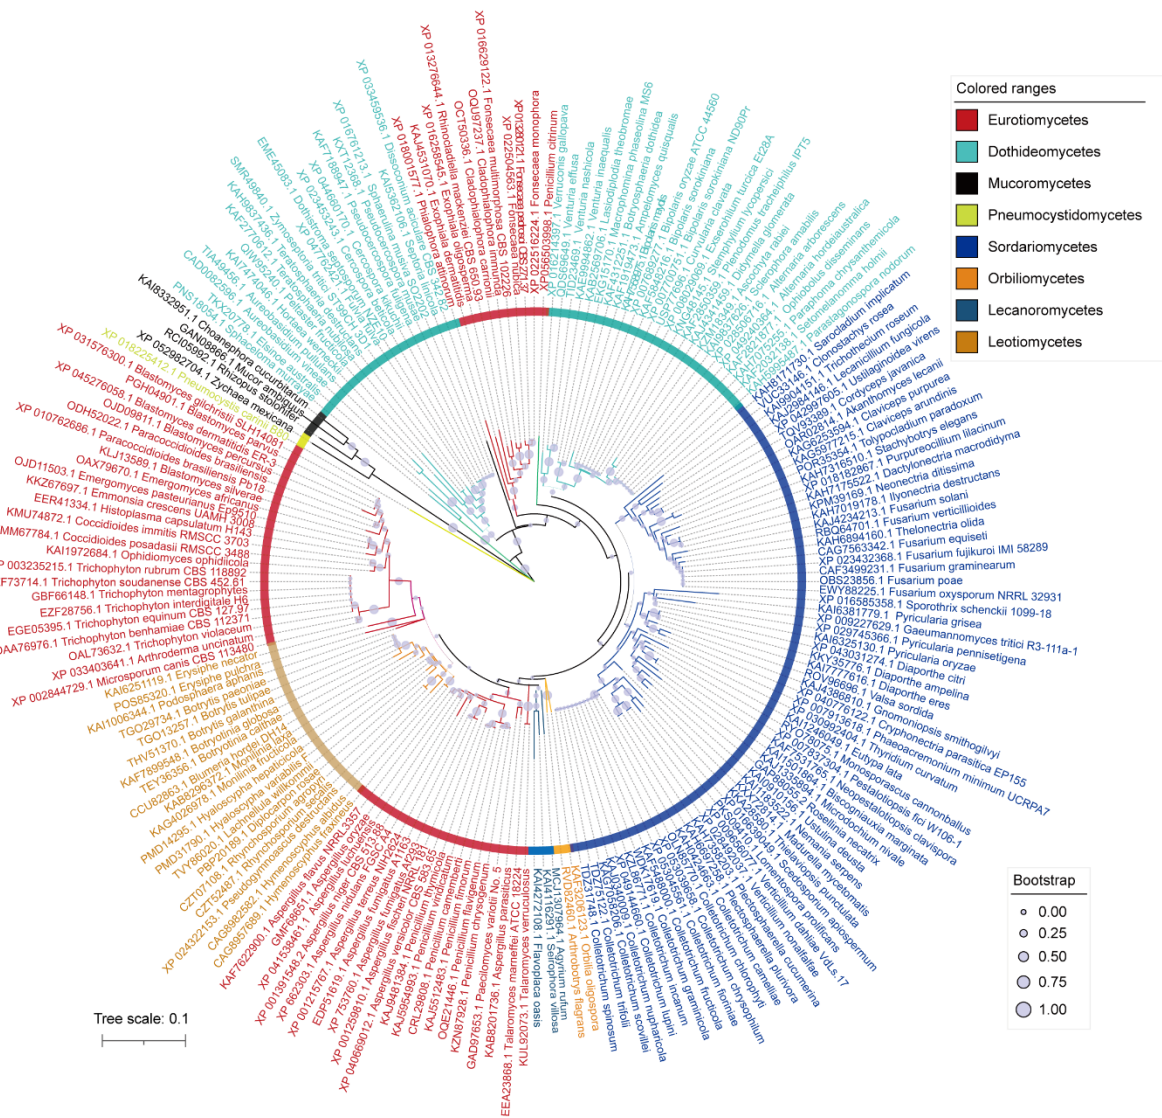

**Supplementary Fig. 2 Phylogenetic tree of secondary metabolism global regulator LaeB in pathogenic fungi.** Different colored circles represent taxonomic units at the class level. Mucoromycetes fungi were considered as the outgroups. The homologues had more than 40% identity and more than 30% coverage.

# Supplemental Figure 3

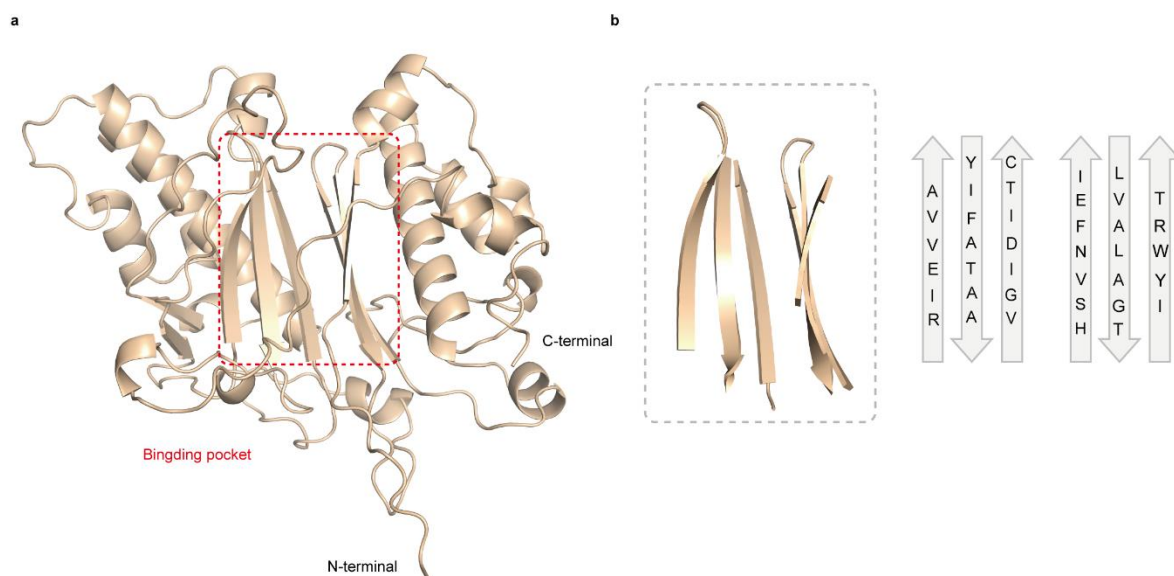

**Supplementary Fig. 3 Binding pocket and amino acid residues in PptA protein.** **a**, The predicted three-dimensional structure of PptA protein obtained by AlphaFold2. *N*-terminal, the starting site for protein synthesis. *C*-terminal, the termination site of protein synthesis. **b**, Three-dimensional structure of PptA protein binding pocket. Binding pocket contains six antiparallel  $\beta$ -sheets.

## Supplemental Figure 4

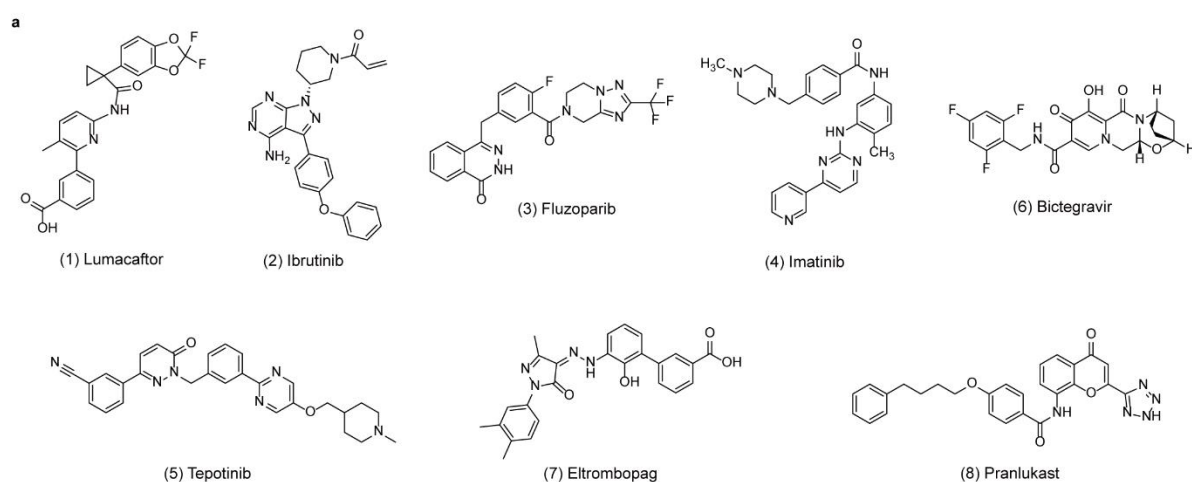

**b**

| FDA drugs       | Clinical trial                                                                                                                                                                              | Biological activity                                                                |
|-----------------|---------------------------------------------------------------------------------------------------------------------------------------------------------------------------------------------|------------------------------------------------------------------------------------|
| (1) Lumacaftor  | Cystic Fibrosis, Phase 1, June 2013<br>Long QT Syndrome, Phase 2, June 15, 2021<br>Cystic Fibrosis Advanced Lung Disease, Phase 3, March 2015                                               | CFTR modulator                                                                     |
| (2) Ibrutinib   | Leukemia, Phase 2, February 27, 2012<br>Chronic Lymphocytic Leukemia, Phase 1, March 9, 2018<br>Small Lymphocytic Leukemia (SLL) Chronic Lymphocytic Leukemia (CLL), Phase 2, July 31, 2020 | Irreversible Btk inhibitor                                                         |
| (3) Fluzoparib  | Advanced solid tumor, Phase 1, September 7, 2019<br>NSCLC Non-small Cell Lung Cancer, Phase 2, July 2023<br>Ovarian Cancer, Phase 2, December 24, 2021                                      | An orally active PARP1 inhibitor, superior antitumor activity                      |
| (4) Imatinib    | Gastrointestinal Stromal Tumors, Phase 1, December 1, 2021<br>Leukemia, Phase 2, April 2001<br>Kidney Cancer, Phase 2, January 2006                                                         | An orally bioavailable tyrosine kinases inhibitor                                  |
| (5) Tepotinib   | FDA approves tepotinib for metastatic non-small cell lung cancer, February 15, 2024                                                                                                         | An orally active and highly selective, reversible, ATP-competitive c-Met inhibitor |
| (6) Bictegravir | HIV-1 Infection, Phase 1, October 24, 2014                                                                                                                                                  | A potent inhibitor of HIV-1 integrase                                              |
| (7) Eltrombopag | Myelodysplastic Syndrome (MDS) Thrombocytopenia, Phase 1, April 6, 2011<br>Hepatitis C, Phase 1, January 19, 2009                                                                           | An orally active thrombopoietin receptor nonpeptide agonist                        |
| (8) Pranlukast  | Chronic Sinusitis, Phase 3, December 2006<br>Rhinitis, Allergic, Season, Phase 3, November 2004                                                                                             | A highly potent, selective and competitive antagonist of peptide leukotrienes      |

**Supplementary Fig. 4 Structure and clinical trial information of the top 8 drugs with high affinity to PptA. a,** Structures of top 8 FDA-approved drug with high affinity for PptA. **b,** Clinical trial information for the top 8 FDA-approved drugs.



49 **Supplemental Figure 5**

(1) Tepotinib

Affinity: -9.224 kcal/mol

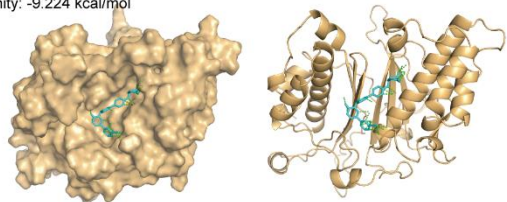

(5) Fluzoparib

Affinity: -9.519 kcal/mol

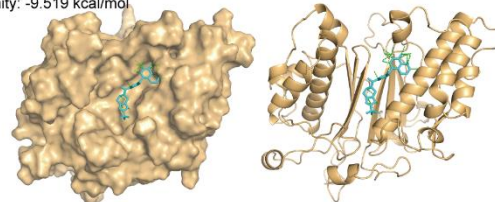

(2) Ibrutinib

Affinity: -9.576 kcal/mol

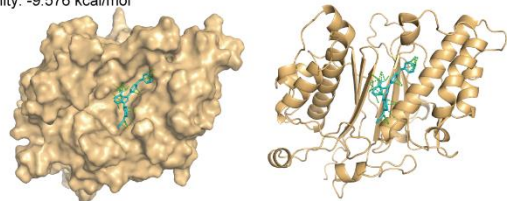

(6) Eltrombopag

Affinity: -9.136 kcal/mol

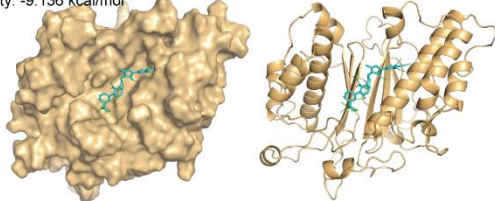

(3) Lumacaftor

Affinity: -9.862 kcal/mol

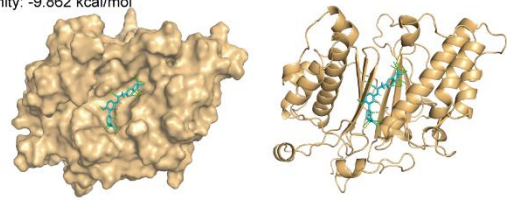

(7) Bictegravir

Affinity: -9.164 kcal/mol

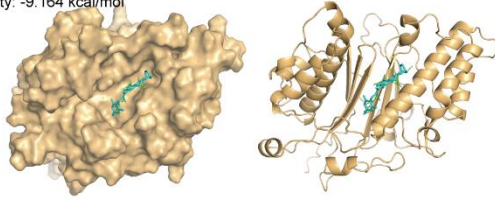

(4) Pranlukast

Affinity: -9.111 kcal/mol

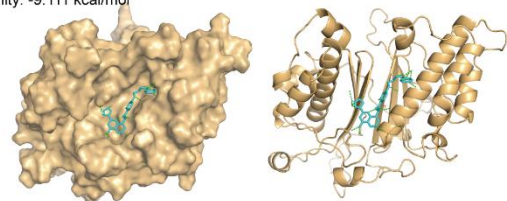

(8) Imatinib

Affinity: -9.301 kcal/mol

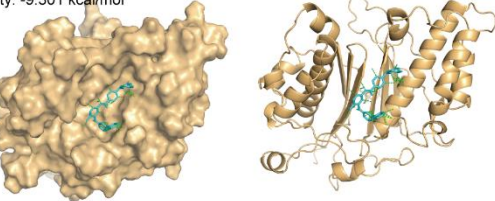

**Supplementary Fig. 5 Interaction models of the top 8 FDA-approved drugs with high affinity to PptA.** The structures of protein-ligand interaction were visualized by PyMOL software.

54      **Supplemental Figure 6**

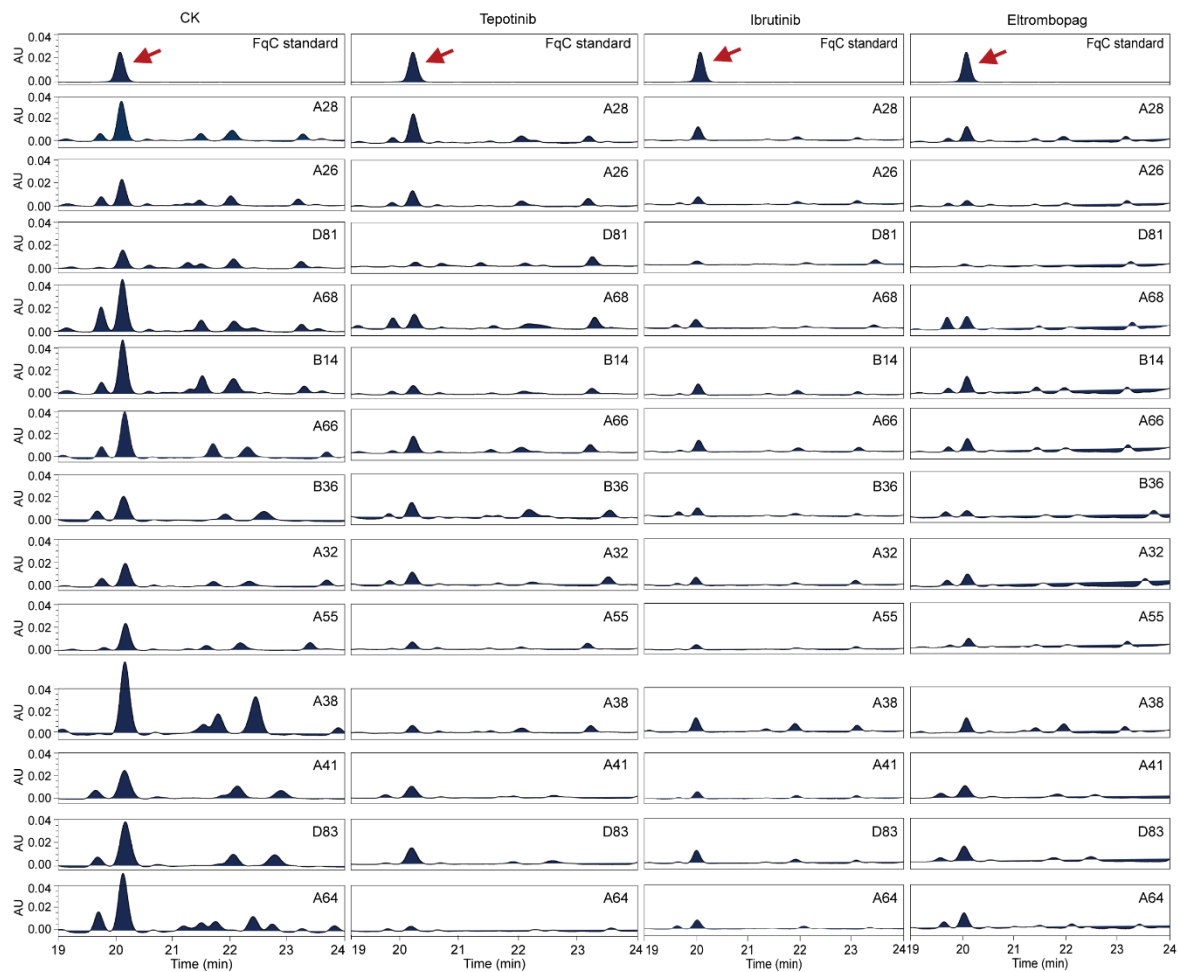

55  
56      **Supplementary Fig. 6 Metabolites analysis of clinical strains treated with 3 drug candidates.** The  
57      metabolic profiles of clinical *A. fumigatus* cultured for 4 days treated with 200  $\mu$ M tepotinib, ibrutinib  
58      or eltrombopag, respectively. The red arrow represents the peak of fumiquinazoline C.  
59

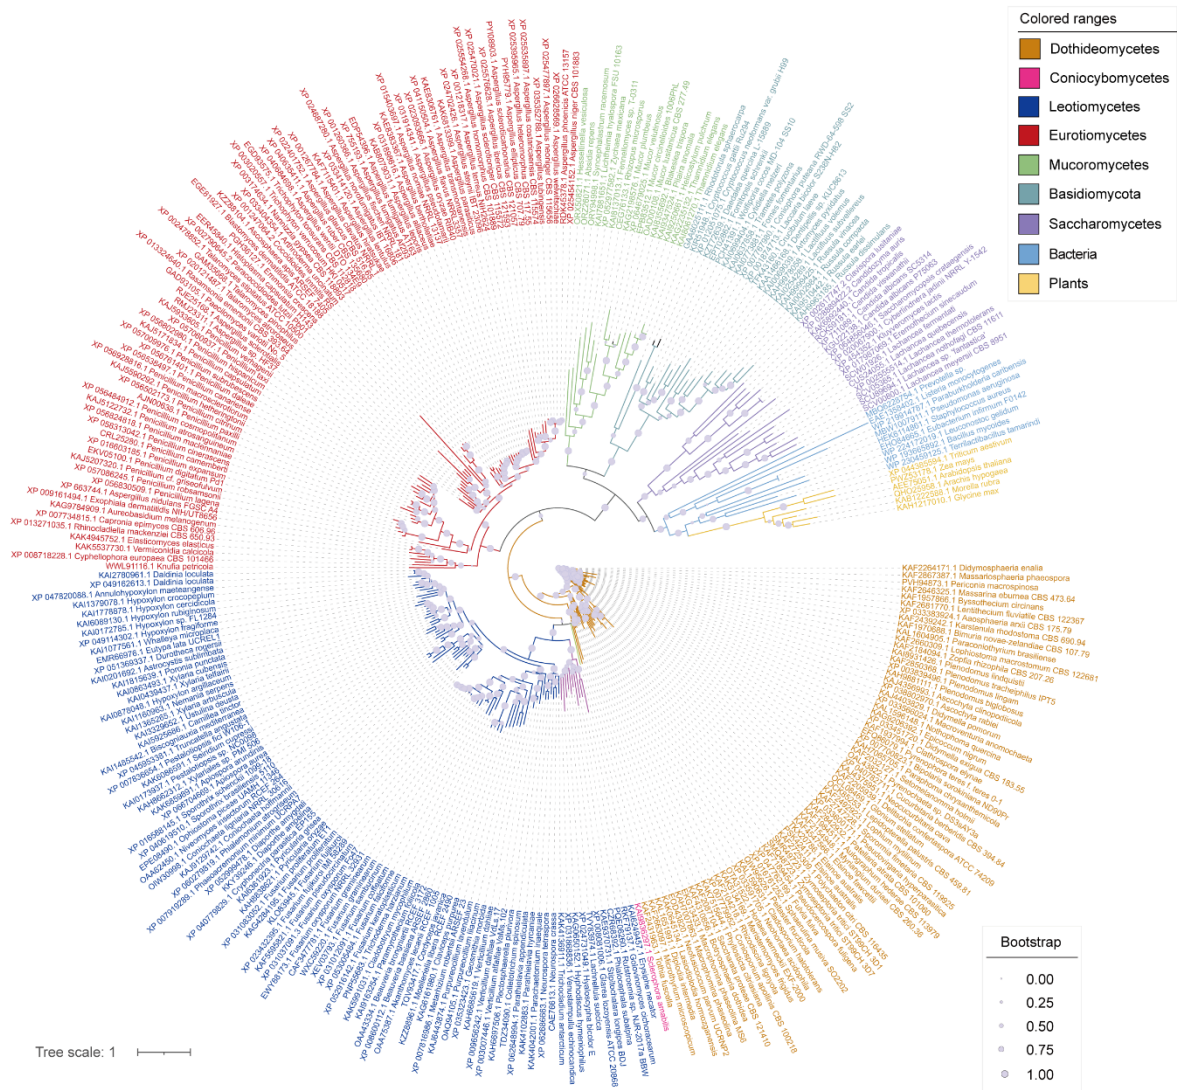

**Supplementary Fig. 7 Phylogenetic analysis of the Sfp-type PPTases.** Different colors represent taxonomic units of different level. Six plant-derived Sfp-type PPTases were considered as the outgroups.



65 **Supplemental Figure 8**

```

A. fumigatus MGS AQNERIPSLTRWYIDTRQLT-----VTNPSLP LLETLPQSDQEA VKRFYHLRDRHMSLASNLLKYLFIHRS CCIPWNKISI
A. flavus MQPPQDESSNCMVRYIDTRDLT-----ATTTSLP LLETLPQSDQESA KR FYHLKDKHMSLASNLLKYLFIHRTCRIPWNQITI
M. circinelloides -----MAKLDLLSFDIKGAFEG-----DKFDRALSWLPKAEHPSVMRFKFDKDRHLALANLLRRHYFSQELQVPWFDFLEF
F. oxysporum -MMSRTQSSPTVIQWVIDTRPLWPSALKTKDLTSAASRALSLTTEEQSSVLRYYHVRDAKLALASALLKRYAISRFCHVPWFQAKT
C. neoformans -----MYNTIHLSAIIKLPSPEPYD-----KETFDRLASLVLEPPGRERLKRFRRLRDDALRSVLARLTVTWYLYTNGLLPPGELPT
C. gattii -----MYNTIHLSAIIKLPSPEPYD-----KETFDKLASLVDSPARERLARFRLPDDALRSVLARLTVTWYLYTNGLLPPGELPT

A. fumigatus SRTDPDPHRRPCFIPS-PALTEATDEPIPIGIEFNVS HQASLVALAGTIIP-QSHGASPNPTTVFANPSPSSVPAPSPVPQVGI DITC
A. flavus SRTDPAPHRRPYFNAAGFIQTAATDKPIPNIEFNVS HQASLVALAGTILPPSSNND SIAPTNVITNPNPTSTPASSIPQVGI DITC
M. circinelloides DR--LPAGKPYLKHFI-----ESLNYDYNTSHEGDWVIFGCTKDM-----KIGVD AVA
F. oxysporum TR--DARTKPYFVLP-----SGDEPLI---FNVS HQAGLAVLLAVHDP-----PKGLAVGV D VVC
C. neoformans FGR-KAKGKPTLSTP-----NLEPRLEFNNTHEGSYILFTTLRSH-----SPLACVGI D IMK
C. gattii FGR-KKGKPTLLIPI-----KLEPRLEFNNTHEGSYILFTTLRSY-----SPLACVGI D IMK

A. fumigatus VDERHARTSSAPSTRDQLAGYVDIFA EYFSSRELDTIKNLGGRFPADAQDGE--AVEYGLRLFYTYWALK EAYI KMTGEALLAPW
A. flavus VNERRN---TPETRQALEEFVGI FSEYFSQRELDTIKSLHG-VPSHIGNDEEDGLVEYGFRLFYTYWALK EAYI KMTGEALLAPW
M. circinelloides IDRPKKI-----SIDAYLKSFPQLTHNEMHLMVDS DNEDIR-----LET FYQLWGCKE SYTKALGLGLSLD-
F. oxysporum PSERRDR-DLSSLEQDGWASFVDIHADVFGAGEVSALKSMNP-VPA AQERDR-----ALRYFYALWCLREAYY KMTGDALLASW
C. neoformans HPNDPFP-----TQEGIS-----DQLTLL EKQSLAMPLSLRDRS-----LRLTKL WSVKEAYTKAIGEGITFG-
C. gattii HPDDPFP-----TQEGIS-----DQLTLL EKRS LAMPLSARDRS-----LRLTKL WSVKEAYTKAIGEGITFG-

A. fumigatus LRELEF TDVIAPEPAPAGQGSAENWGEPYTGVIWLYGKRVEDVRIEVVAFETGYIFATAARGAGLGAESRPLSRDAGVAVSV D
A. flavus LRELVTNVLAP E PAGR---HLHTWGEPYTGVIWLYGKEVEDVRLLEVAFENDYLIATAARGGGIGWRS---EGDG---AD
M. circinelloides LLKLDFSNVQDTI-----KMKFDGQQLDNWVFFYLDRLD DTTLAVVCCGFIETSQLDSGII EFSR--LTQ
F. oxysporum LKDL E MHNFA PPE-----DMEEAQEVRLRGKKV EGV D VRLMPLLEEYMI STAVRNGDNGERV-----
C. neoformans LERIEVELSASAG-----KVERVKVDGRD V DERGW EWRVGEIGEDYGWA V WVRGSDVEREL-----
C. gattii LERIEVELSAGAG-----KVERVKVDGRD V DERGW EWRVGEIGEDYGWA V WVRGDDYERKL-----

A. fumigatus RWMHMEKIDIDRDIA PCATGVCQCTKK-----
A. flavus PWQRLEKIDIEKDVRPCATGVCQCLK-----
M. circinelloides LLGKRSQMKKDTDIFHQIKLQDI ENNKWMPRS
F. oxysporum ELGEFQSLDMEEVLAFGEKASKS-----
C. neoformans VIDHISWEDFVRPLLVLAE S RLTSNT-----
C. gattii VIDHISWEDFARPLLVLAE S RLTSNT-----

```

66  
67 **Supplementary Fig. 8** Conservative analysis of drug binding sites in fungal Sfp-type PPTases.  
68 Binding sites D159, W227, E231, and K235 of the three drug candidates were conserved in fungal Sfp-  
69 type PPTases, including *A. fumigatus*, *A. flavus*, *Mucor circinelloides*, *Fusarium oxysporum*,  
70 *Cryptococcus neoformans*, and *Cryptococcus gattii*.  
71

## Supplemental Figure 9

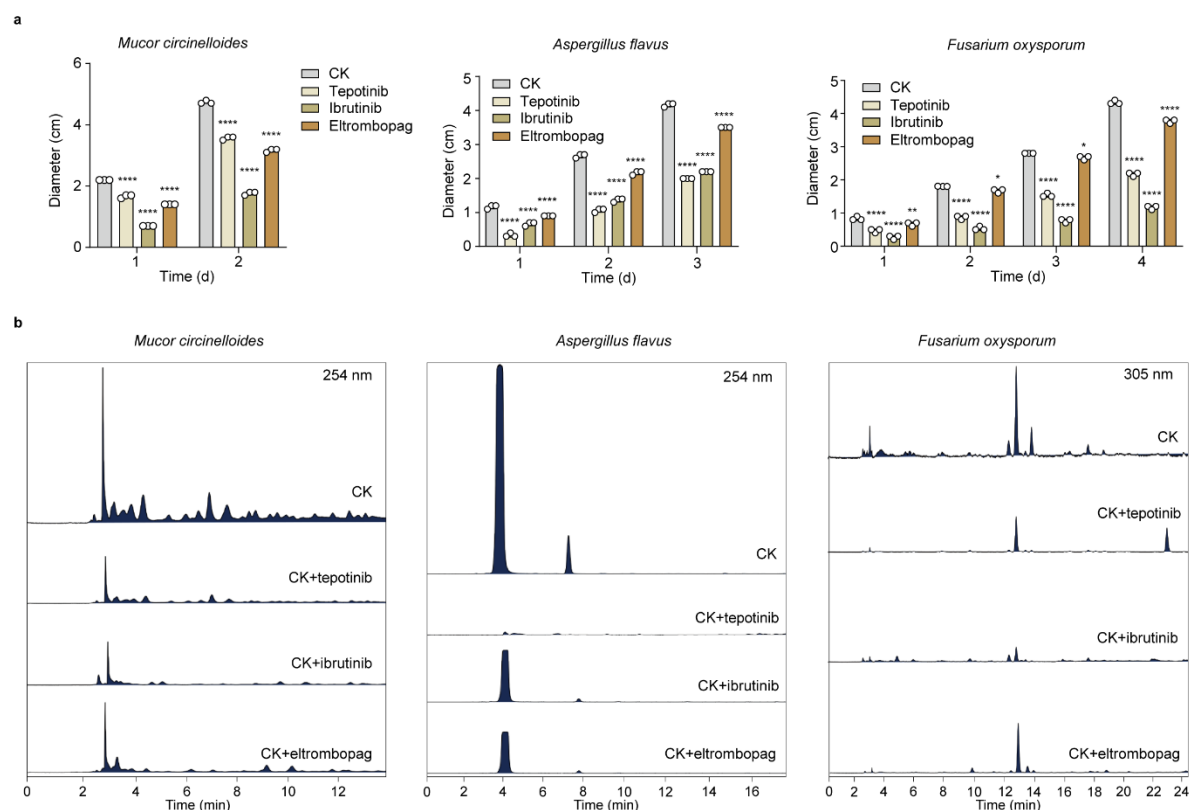

**Supplementary Fig. 9 Growth and metabolite analysis of other pathogenic fungi treated with 3 drug candidates. a-b,** Evaluation of growth (a) and metabolism (b) of filamentous fungi *M. circinelloides*, *A. flavus* and *F. oxysporum*. The metabolic profiles of *M. circinelloides* treated with 200  $\mu$ M drugs at 28°C for 3 days. The metabolic profiles of *A. flavus* treated with 200  $\mu$ M drugs at 37°C for 4 days. The metabolic profiles of *F. oxysporum* treated with 200  $\mu$ M drugs at 28°C for 5 days. All error bars are expressed as  $\pm$ SD. Statistical analysis was performed by using Two-way ANOVA (“ns”: not significant. Significant at \* $p < 0.05$ , \*\* $p < 0.01$ , \*\*\* $p < 0.0001$ ).
