# Supplementary material for: CsdA-LaeB hub governs Aspergillus fumigatus virulence via FqC biosynthesis
Source: Research Square preprint supplement (doi:10.21203/rs.3.rs-6615529/v1), 2025-06-12
Supplement: Supplementary file 2 [file 879afff6aa9bb419c6492ee1.xlsx]

## Sheet: Strains
Supplementary Table 7 - Strains, plasmids and primers used in this study.
Strain name	Genotype	References
Clinical Aspergillus fumigatus
A26	Wide type	This study
A28	Wide type	This study
A32	Wide type	This study
A38	Wide type	This study
A41	Wide type	This study
A55	Wide type	This study
A64	Wide type	This study
A66	Wide type	This study
A68	Wide type	This study
B14	Wide type	This study
B36	Wide type	This study
D83	Wide type	This study
D81	Wide type	This study
Environmental Aspergillus fumigatus
34	Wide type	This study
44	Wide type	This study
54	Wide type	This study
55	Wide type	This study
56	Wide type	This study
Aspergillus fumigatus A1163 background strains
Aspergillus fumigatus CEA17.1	ΔnkuB, control	Yin W-B, Baccile JA, Bok JW, Chen Y, Keller NP, Schroeder FC. A nonribosomal peptide synthetase-derived iron(III) complex from the pathogenic fungus Aspergillus fumigatus. J Am Chem Soc. 2013, 135(6):2064-7.
A. fumigatus CEA17.2	ΔnkuB, AfpyrG-, control	Yin W-B, Baccile JA, Bok JW, Chen Y, Keller NP, Schroeder FC. A nonribosomal peptide synthetase-derived iron(III) complex from the pathogenic fungus Aspergillus fumigatus. J Am Chem Soc. 2013, 135(6):2064-7.
TYYJ14	ΔlaeB⸬AfpyrG	Song Z, Zhou S, Zhang H, Keller NP, Oakley BR, Liu X, Yin W-B. Fungal secondary metabolism is governed by an RNA-binding protein CsdA/RsdA complex. Nat Commun. 2023, 14(1):7351.
TYSZL12	ΔcsdA⸬AfpyrG	Song Z, Zhou S, Zhang H, Keller NP, Oakley BR, Liu X, Yin W-B. Fungal secondary metabolism is governed by an RNA-binding protein CsdA/RsdA complex. Nat Commun. 2023, 14(1):7351.
TYSZL42	ΔcsdA::AfpyrG, csdA::hph	This study
TYSZL44	ΔlaeB::AfpyrG, laeB::hph	This study
TYSZL17	laeB⸬sfGFP⸬AfpyrG	This study
TYSZL18	csdA::mCherry::hph	This study
TYSZL21	laeB::sfGFP::AfpyrG, csdA::mCherry::hph	This study
TYSZL37	PgpdA⸬laeB⸬nyfp⸬hph, cyfp⸬AfpyrG	This study
TYSZL36	nyfp⸬hph, PgpdA⸬csdA⸬cyfp⸬AfpyrG	This study
TYSZL25	PgpdA⸬laeB⸬nyfp⸬hph, PgpdA⸬csdA⸬cyfp⸬AfpyrG	This study
TYLYX3	ΔfmqC::hph	This study
TYSZL79	ΔfmqC⸬hph, ΔlaeB::AfpyrG	This study
TYSZL80	ΔfmqC⸬hph, ΔcsdA::AfpyrG	This study
TYSZL81	ΔpptA::AfpyrG	This study
Other pathogenic fungi
Aspergillus flavus NRRL3357	—	This study
Mucor circinelloides 11	—	This study
Fusarium oxysporum CGMCC 3.2830	—	This study
Cryptoccus neoformans H99	—	This study
Cryptoccus gattii R265	—	This study
Other strains
Escherichia coli DH5α	—	Novagen
E. coli BL21	—	BioDynamics Inc.
Saccharomyces cerevisiae BJ5464	—	Harvey, C. J. B. et al. HEx: A heterologous expression platform for the discovery of fungal natural products. Sci. Adv. 4, eaar5459 (2018).
TXX = original transformant

## Sheet: Plasmids
Supplementary Table 7 - Strains, plasmids and primers used in this study.
Plasmid	Genotype	References
pXW55	2μ, URA3, ADH2p-ACPC-ADH2t, Amp	Zhang, P. et al. Two transcription factors cooperatively regulate DHN melanin biosynthesis and development in Pestalotiopsis fici. Mol. Microbiol. 112, 649-666, doi:10.1111/mmi.14281 (2019).
pYH-WA-pyrG	URA3, WA flanking, AfpyrG, Amp	Zhang, P. et al. A cryptic pigment biosynthetic pathway uncovered by heterologous expression is essential for conidial development in Pestalotiopsis fici. Mol Microbiol. 105(3):469-483 (2017).
pYSZL11	laeB⸬sfGFP⸬AfpyrG⸬TlaeB in pXW55	This study
pYSZL13	csdA⸬mcherry⸬hph⸬TcsdA in pXW55	This study
pET28a	T7 promoter, lacI, Kanr	Novagen
pYSZL46	laeB expression cassette in pET28a	This study
pGEX-4T	Tac promoter, GST-tag, Amp	ZOMANBIO
pYSZL47	csdA expression cassette in pGEX-4T	This study
pCX62-CYFP	cyfp	Wang, M. et al. The RNA binding protein FgRbp1 regulates specific pre-mRNA splicing via interacting with U2AF23 in Fusarium. Nat. Commun. 12, 2661-2675, doi:10.1038/s41467-021-22917-3 (2021).
pKNT-NYFP	nyfp	Wang, M. et al. The RNA binding protein FgRbp1 regulates specific pre-mRNA splicing via interacting with U2AF23 in Fusarium. Nat. Commun. 12, 2661-2675, doi:10.1038/s41467-021-22917-3 (2021).
pYSZL32	AfpyrG in pCX62-CYFP	This study
pYSZL33	hph in pKNT-NYFP	This study
pYSZL28	hyg-PgpdA-AFUB_056300-nyfp	This study
pYSZL25	AfpyrG-PgpdA-AFUB_050690-cyfp	This study
pYSZL56	PcsdA⸬csdA⸬hph⸬TcsdA in pXW55	This study
pYSZL57	PlaeB⸬laeB⸬hph⸬TlaeB in pXW55	This study
pXX = plasmid

## Sheet: Primers
Supplementary Table 7 - Strains, plasmids and primers used in this study.
Primers	Oligonucleotide sequences (5’- 3’)	Description
Aspergillus fumigatus
laeB-1st-5F-F	gcatggttcagaccgaactag	laeB 5’ flanks amplification
laeB-1st-5F-R	tcctctcgggccatctgttcgtataagctgatatcaggaaggcctagcag
laeB-1st-3F-F	gcttatcgatgataagctgtcaaacatgaggctaactctatctccttgccttc	laeB 3’ flanks amplification
laeB-1st-3F-R	acgttgagtcaaactcgacc
para pyrG-F	agcttatacgaacagatggcc	para pyrG amplification
para pyrG-R	ctcatgtttgacagcttatcatcg
laeB-3rd-F	gatacaaggacgagcctgtcg	laeB deletion cassette amplification
laeB-3rd-R	ccggcaacctcaatggattac
laeB-RT-F	tgtgtctatcctcgtgcttgc	ΔlaeB transformant screening
laeB-RT-R	ccagccagtggtatccatacg
scr-laeB-5FF	cctcttagactccagcagcaac
scr-laeB-5FR	gcactattatccatcgagtccg
scr-laeB-3FF	cgataagtccaaccttatcggc
scr-laeB-3FR	gttgctgatcaaggtccatgc
csdA-1st-5F-F	ctgggcaagaagcatggctc	csdA 5’ flanks amplification
csdA-1st-5F-R	cacaacatatttcgtcagacacagaataactctccgctcagattgttgtcttcttttcc
csdA-1st-3F-F	gcttggcatcacgcatcagtgcctcctctcagacagaatgagcgggaacacctctttgg	csdA 3’ flanks amplification
csdA-1st-3F-R	gcagttgcctcagagctctcag
pyrG-F	gagagttattctgtgtctgacga	pyrG amplification
pyrG-R	attctgtctgagaggaggca
csdA-3rd-F	caggaagtgatggacgtggaatc	csdA deletion cassette amplification
csdA-3rd-R	ccatggcaggtatatgacagtcc
csdA-RT-F	cctgcgaggaggtgggttc	ΔcsdA transformant screening
csdA-RT-R	cagctgcactcggagatccc
scr-pyrG-3FF	caggacaagtcgacctgtgc
scr-pyrG-5FR	ctgtattcctccgcctccgac
TYLYX3_1_F	gcaaggaagtccaggcagc	fmqC 5’ flanks amplification
TYLYX3_1_R	cggagacaacgacacttgatcgacattccaatcgataccgtcgacgttaactgatattg
TYLYX3_2_F	cattccaatcgataccgtcgac	Afhph amplification
TYLYX3_2_R	gtggataaccgtattaccgcc
TYLYX3_3_F	tcagctcactcaaaggcggtaatacggttatccacgaagggacctgagataggtttgtg	fmqC 3’ flanks amplification
TYLYX3_3_R	tcttctctgccacgcgtagg
TYSZL42_1_F	ataaggatgatgatgataagactagtCCGTTTTGCAGTTGCCGTTC	csdA 5’ flanks and csdA amplification
TYSZL42_1_R	GTTCTGTTACCGAGCCGGTATTTAAGCAGGGGACTTGCTGGC
TYSZL42_2_F	ATCAACGGTCGTCAAGAGCTCTGAACGATATGCTCCAACGAGCGGGAACACCTCTTTGG	csdA 3’ flanks amplification
TYSZL42_2_R	tagtgatggtgatggtgatgcacgtgGCTGTCCTCTAGACCAATGATGC
TYSZL42_3_F	GACCCATCACTGAGCTGGATG	Amplification of the csdA complementary fragment
TYSZL42_3_R	GACCAATGATGCAAGTAGCTTGG
TYSZL42_4_F	CCGTTTTGCAGTTGCCGTTC	csdA complementary transformant screening
TYSZL42_4_R	CCACCTGGAAGACGTGCC
TYSZL44_1_F	ataaggatgatgatgataagactagtGGCATGGTTCAGACCGAACTAG	laeB 5’ flanks and laeB amplification
TYSZL44_1_R	GTTCTGTTACCGAGCCGGTTACGCTTCAACTTCTTCTGCGC
TYSZL44_2_F	CTGAACGATATGCTCCAACATGGAACAGATGTGTGATATGCTTGTTG	laeB 3’ flanks amplification
TYSZL44_2_R	tagtgatggtgatggtgatgcacgtgGTCAAAAGACCCTGGTTGCGG
TYSZL44_3_F	GGCATGGTTCAGACCGAACTAG	Amplification of the laeB complementary fragment
TYSZL44_3_R	GGTAAACCCCAGCGTGGAG
TYSZL44_4_F	CGTCCATCCTGTCCTTTTAGTGTC	laeB complementary transformant screening
TYSZL44_4_R	GCGTTGCTGATCAAGGTCCATG
pptA-1st-5F-F	CGTGGTCTATTGGCGCAGC	pptA 5’ flanks amplification
pptA-1st-5F-R	tcagacacagaataactctcCTTTTCGGACAGCTGCGAAGTAATC
pptA-1st-3F-F	tgcctcctctcagacagaatCCCTAGGAGAGTCTATATGAGCGTTC	pptA 3’ flanks amplification
pptA-1st-3F-R	CACCACGCCTGACCTCATAC
pptA-3rd-F	GAACTGCACTAGCTGTTCCAGG	pptA deletion cassette amplification
pptA-3rd-R	GCACGGCTCAGCAAGAGTG
pptA-RT-F	GCGATGGTACATAGACACGCG	ΔpptA transformant screening
pptA-RT-R	GGTGCAATATCCCTGTCGATATCG
Proteins
pYSZL46-1-F	ggacagcaaatgggtcgcggatccgaattcgagctcatggttcagaccgaactaggtcc	QC laeB cDNA to pET28a
pYSZL46-1-R	ggtggtggtgctcgagtgcggccgcaagcttgtcgaccgcttcaacttcttctgcgctc
pYSZL46-2-F	cggtgatgtcggcgatatag	PCR validation of pYSZL46
pYSZL46-2-R	ctgtgtatggaggaggctgtac
pYSZL47-1-F	cgaccatcctccaaaatcggatctggttccgcgtggatccatggcaaccgtctcagcac	QC csdA cDNA to pGEX-4T
pYSZL47-1-R	cgcgcgaggcagatcgtcagtcagtcacgatgcggccgcagcaggggacttgctggc
pYSZL47-2-F	gccgacatcataacggttctgg	PCR validation of pYSZL47
pYSZL47-2-R	cagctgcactcggagatccc
Subcellular localization
pYSZL11-1-F	ggctagcgattataaggatgatgatgataagactagtgactccagcagcaacaccttg	Amplification of laeB gene
pYSZL11-1-R	cacgacaccggtgaacagctcctcgcccttgcgcatcgcttcaacttcttctgcgc
pYSZL11-2-F	atgcgcaagggcgaggag	Amplification of sfGFP
pYSZL11-2-R	acacaacatatttcgtcagacacagaataactctctcacttgtagagctcgtccatgc
pYSZL11-3-F	gagagttattctgtgtctgacga	Amplification of AfpyrG
pYSZL11-3-R	attctgtctgagaggaggca
pYSZL11-4-F	gcatcacgcatcagtgcctcctctcagacagaatatggaacagatgtgtgatatgcttg	laeB 3’ flanks amplification
pYSZL11-4-R	gtcatttaaattagtgatggtgatggtgatgcacgtggctgatcaaggtccatgctcag
pYSZL11-5-F	gaaggttcctcgagcgcag	PCR validation of pYSZL11
pYSZL11-5-R	ggtcaatcactggtaactccacg
pYSZL11-6-F	gaagccgattctcacccgag	Amplification of laeB-sfGFP integration cassette
pYSZL11-6-R	gttgcggtaaaccccagcg
pYSZL13-1-F	ctagcgattataaggatgatgatgataagactagtctggtcgtgatttaaggtcctc	Amplification of csdA gene
pYSZL13-1-R	gatgatggccatgttatcctcctcgcccttgctcaccatggagcaggggacttgctggc
pYSZL13-2-F	ccatggtgagcaagggcga	Amplification of mCherry
pYSZL13-2-R	cttttggttacgccgttagttctgttaccgagccggcttgtacagctcgtccatgcc
pYSZL13-3-F	ccggctcggtaacagaactaac	Amplification of hph
pYSZL13-3-R	gttggagcatatcgttcagagc
pYSZL13-4-F	caacggtcgtcaagagctctgaacgatatgctccaacatagagcgggaacacctctttg	csdA 3’ flanks amplification
pYSZL13-4-R	gtcatttaaattagtgatggtgatggtgatgcacgtgcgaagtggatggctcgtaatg
pYSZL13-5-F	gcgacagacggatcgaatg	PCR validation of pYSZL13
pYSZL13-5-R	cgccgttagttctgttaccgagc
pYSZL13-6-F	ggtcctctgcttaactttgcag	Amplification of csdA-mCherry integration cassette
pYSZL13-6-R	gcagttgcctcagagctctcag
BIFC
pYSZL33-1-F	ctaaagggaacaaaagctgggtaccccggctcggtaacagaactaac	Integration of hph to pKNT-NYFP
pYSZL33-1-R	ccatcgtggcgatggagcgaagcttgttggagcatatcgttcagagc
pYSZL32-1-F	ctaaagggaacaaaagctgggtaccgagagttattctgtgtctgacga	Integration of AfpyrG to pCX62-CYFP
pYSZL32-1-R	gggatcttgcaggccgggcgaagcttattctgtctgagaggaggca
pYSZL28-1-F	ctgaacgatatgctccaacccgatagctctgcaaagggc	Integration of gpdA to pYSZL33
pYSZL28-1-R	ggtgatgtctgctcaagcg
pYSZL28-2-F	ccgcttgagcagacatcaccatggttcagaccgaactaggtc	Integration of laeB to pYSZL33
pYSZL28-2-R	ccatcgtggcgatggagcgaagcttcgcttcaacttcttctgcgc
pYSZL25-1-F	gcctcctctcagacagaatccgatagctctgcaaagggc	Integration of gpdA to pYSZL32
pYSZL25-1-R	ggtgatgtctgctcaagcg
pYSZL25-2-F	ccgcttgagcagacatcaccatggcaaccgtctcagcac	Integration of csdA to pYSZL32
pYSZL25-2-R	gggatcttgcaggccgggcgaagcttagcaggggacttgctggc
TYSZL37-1-F	ggtcgtcaagagctctgaacg	TYSZL37 transformant screening
TYSZL37-1-R	gctgcctgctgtatgtgcttg
TYSZL37-2-F	cgtatgttgtgtggaattgtgagc
TYSZL37-2-R	attctgtctgagaggaggca
TYSZL36-1-F	ggtccctcaggacaagtcg	TYSZL36 transformant screening
TYSZL36-1-R	cagctgcactcggagatccc
TYSZL36-2-F	cccatccaagaacctttatttcccc
TYSZL36-2-R	gttggagcatatcgttcagagc
qRT-PCR
laeB_un1_F	gagccttccatcaccagtcatg	Splicing rate of introns in laeB
laeB_s1_F	gcctgtcgacgaccatatcag
laeB_un1_R	ggtgcaccaggcagagaag
laeB_un2_F	ccgtcttaccagggtataaagcac
laeB_s2_F	catctagtggccttcctgatatcatg
laeB_un2_R	ctgtgtatggaggaggctgtac
laeB_un3_R	gacaccgttgtcaaatccaacag
laeB_s3_R	ctcagtggtaccgctgacatc
laeB_un3_F	gcgcaaccacctactcacatg
laeB_un4_F	gactgcgactgtcggaagg
laeB_s4_R	ggtatgcgtcaagagagcgttg
laeB_un4_R	gccacagcaaggatggtgg
laeB qPCR_F	gaagccgacgtgtgaggag	Gene expression of laeB
laeB qPCR_R	cttccactaccttcaggttgagc
csdA qPCR_F	caatggaggaggccatcactc	Gene expression of csdA
csdA qPCR_R	gtgtagtgtcgtgaggcagg
Af_actin_F	tgctcctcctgagcgtaaat	Housekeeping gene of A. fumigatus
Af_actin_R	gctctcgtcgtactcctgct
fmqC_RTPCR_F	cgatgccgaggacgagtc	Gene expression of fmqC
fmqC_RTPCR_R	aagactattgtcctggtgctgc
Afks1_F	gcctggtagtgaagctgagcgt	Fungal burden
Afks1_R	cggtgaatgtaggcatgttgtcc
