# Supplementary material for: CsdA-LaeB hub governs Aspergillus fumigatus virulence via FqC biosynthesis
Source: Research Square preprint supplement (doi:10.21203/rs.3.rs-6615529/v1), 2025-06-12
Supplement: Supplementary file 3 [file 8c9770a66f3ca109aa5aa2c3.xlsx]

## Sheet: A. fumigatus-Tepotinib
Supplementary Table 6 - Mass spectrometry data from metabolome analysis of pathogenic fungi treated with drugs.
Total metabolic ions								Inhibited metabolic ions (1)						Inhibited metabolic ions (2)
	M/Z	Re time	DMSO-1	DMSO-2	Tepotinib-1	Tepotinib-2			M/Z	Re time	DMSO-1	Tepotinib-1			M/Z	Re time	DMSO-2	Tepotinib-2
1	186.9	0.098	0	0	2280.16	0		1	419.9	10.45	120711	0		1	362.1	7.36067	202312	0
2	261.3	0.1175	0	0	0	2891.33		2	281.3	21.492	98826.7	0		2	526.4	28.5697	70633.7	0
3	359	0.152167	2040.54	0	4397.94	0		3	454.2	7.35492	48254.4	0		3	262.1	36.6453	49769.3	0
4	261.2	0.205	3250.71	508.67	2089.04	598.038		4	263.1	36.734	41134.6	0		4	527.4	28.5871	44251.4	0
5	245.2	0.265333	0	273.602	512.65	2534.46		5	527.4	28.5871	40966.1	0		5	687.5	21.5978	36827.8	0
6	261	0.294	2709.7	2871.45	1301.79	651.438		6	607.2	12.0893	23307.5	0		6	546.4	28.659	33777.1	0
7	111.1	0.467333	2322.34	3452.59	1864.62	3050.16		7	524.4	28.6498	23017.5	0		7	293.2	15.022	31780.9	0
8	365	0.489	5338.08	9224.47	0	591.059		8	426	9.67	22038	0		8	524.4	28.6498	25779.4	0
9	394.1	0.505167	1315.2	5270.71	584.807	3846.94		9	381.2	10.4588	20118.8	0		9	393.1	36.5435	24122.6	0
10	104	0.507	2851.61	746.997	0	1564.07		10	551.2	13.02	18944.4	0		10	580.2	17.1932	20462.9	0
11	394.9	0.507	2388.05	0	1909.28	0		11	467.2	24.54	18529.9	0		11	659.9	7.39483	20385.6	0
12	104.3	0.523	0	0	2768.72	0		12	381.1	10.379	16994.2	0		12	111	12.3232	20364.3	0
13	432.9	0.523	1749.8	382.149	4131.88	0		13	396.2	9.67	16008.8	0		13	217.1	36.4625	20167.7	0
14	381.1	0.531667	4430.06	964.747	7394.56	8959.89		14	371	15.058	15297.7	0		14	393	29.4293	19032.6	0
15	202.9	0.540833	852.79	0	4831.75	0		15	547.3	9.971	14848.3	0		15	459.3	15.289	18832.9	0
16	219	0.542	3298.3	1046.9	993.407	1796.59		16	462.2	8.33133	14790.7	0		16	273.2	9.35317	18786	0
17	361.2	0.557667	0	0	3105.8	0		17	437.3	17.202	14374.4	0		17	606.3	12.0282	17465.9	0
18	388.2	0.557667	0	0	2672.26	0		18	591.2	16.033	14238.2	0		18	451.2	7.36325	16385.3	0
19	221.1	0.557667	1386.48	0	3258.22	304.982		19	403.1	10.494	14079.7	0		19	874.8	7.37717	16335	0
20	466.1	0.557667	1038.05	1578.63	3363.38	691.087		20	549.2	15.076	13899.8	0		20	470.2	7.933	16036.6	0
21	499.1	0.558833	2065.03	1024.89	569.645	3959.08		21	570.2	12.2378	13765.9	0		21	152.2	36.7743	15804.7	0
22	206	0.5595	370.656	2786.41	1629.92	0		22	598.2	12.896	13641.6	0		22	348	7.34317	15166.4	0
23	203.1	0.559917	5940.61	4566.03	529.705	7475.95		23	478.3	15.1645	13018.9	0		23	482.3	14.9115	14824.9	0
24	366.1	0.566917	6410.23	1525.16	9121.67	5863.83		24	479.4	21.775	12444.4	0		24	497.4	7.34317	14111.2	0
25	409	0.576167	403.86	1547.39	550.74	4639.14		25	231.9	36.858	12220.7	0		25	409.1	15.022	13158.2	0
26	450	0.576167	1736.28	998.986	1207.71	7643.01		26	470.3	15.005	11819	0		26	909.2	9.55108	13127	0
27	268.7	0.577167	0	2391.36	0	0		27	317	17.6268	11702.4	0		27	883.3	7.39483	12832.8	0
28	535	0.577167	0	2900.54	590.348	0		28	376.2	8.09217	11691.8	0		28	371.2	17.042	12727.4	0
29	365.1	0.577583	63105.5	41006.4	66660.3	73291.2		29	482	9.564	11462.2	0		29	652.3	11.1877	11579.7	0
30	101	0.578	8346.26	2938.12	1873.45	852.728		30	498.3	15.324	11172.8	0		30	371.9	6.39417	11555	0
31	395	0.578	3864.73	2082.12	225.566	3505.44		31	279.1	17.237	10890.4	0		31	419.4	26.6958	11491.3	0
32	450.1	0.578	10293.3	1769.78	7890.64	4445.02		32	331.1	21.474	10728.3	0		32	377.2	27.8761	11416.9	0
33	104.1	0.58425	1655.29	363.183	2903.73	3535.06		33	286.3	22.715	10452.1	0		33	512.3	16.7943	11225.1	0
34	381	0.5935	4182.76	7548.62	7645.78	4932.03		34	568.3	21.633	9905.7	0		34	371	6.852	11188.3	0
35	427.2	0.5935	0	360.235	5463.24	1964.13		35	404.2	8.571	9864.03	0		35	652.4	13.2117	11146.5	0
36	535.1	0.594833	2863.06	205.809	1024.86	3976.71		36	313.3	14.969	9737.73	0		36	312.3	14.9878	11097.9	0
37	450.2	0.595	0	6579.94	0	0		37	370.9	16.139	9686.28	0		37	507.3	19.9293	11038.9	0
38	140	0.595	772.992	3052.53	394.014	480.227		38	941.4	15.324	9564.37	0		38	482.1	15.7325	10701.4	0
39	280	0.595	8950.89	2835.83	3278.76	5861.7		39	284.1	23.335	9371.79	0		39	404.1	7.516	10530.8	0
40	366	0.595	1186.14	4841.67	2096.73	641.357		40	402.2	10.45	9304.69	0		40	570.3	14.2098	10151.6	0
41	279.9	0.610333	0	0	3060.89	0		41	416.1	8.695	9292.98	0		41	371.2	39.3757	10127.8	0
42	124.2	0.610333	452.625	1197.58	5591.98	614.776		42	541.5	19.196	9179.23	0		42	513.4	15.5372	9991.56	0
43	206.1	0.610333	413.4	1231.31	5516.23	314.036		43	285.3	15.2703	9097.99	0		43	498.3	15.5542	9933.4	0
44	382.2	0.613	645.333	1855.41	248.323	3498.67		44	395.3	24.364	9010	0		44	381.2	10.4588	9926.92	0
45	113.1	0.629	0	4547.97	8627.15	3427.79		45	528.3	25.568	8937.92	0		45	379.2	28.521	9865.98	0
46	205.1	0.6295	4210.06	8280.38	16054.8	10765.5		46	371	13.0605	8864.35	0		46	360.4	26.5815	9774.26	0
47	269.2	0.646917	204.58	3198.94	2915.75	0		47	152.2	36.7743	8847.82	0		47	976.5	10.7055	9759.66	0
48	124.1	0.647167	0	8920.87	2337.5	769.309		48	396.2	8.26667	8731.01	0		48	599.3	13.4216	9575.28	0
49	375.1	0.647167	995.775	5561.6	1867.13	495.529		49	546.3	24.558	8571.85	0		49	370.9	1.10667	9497.72	0
50	113	0.648	7053.49	393.353	1121.49	1791.6		50	325.3	10.06	8565.86	0		50	527.5	28.8103	9298.94	0
51	206.2	0.65675	0	2638.62	0	3864.19		51	652.3	11.1877	8512.54	0		51	653.3	13.2117	9178.54	0
52	205.2	0.664	510.92	0	8740.71	492.528		52	587.3	12.08	8461.41	0		52	512.4	16.813	8999.6	0
53	280.1	0.664833	0	5170.13	632.66	2001.09		53	512.4	16.813	8305.58	0		53	547.4	28.6678	8718.62	0
54	244.2	0.666	3112.16	0	1004.89	0		54	542.2	9.24267	8291.95	0		54	888.3	7.308	8700.48	0
55	267.1	0.674583	0	280.389	5390.51	8188.02		55	599.5	21.827	8139.23	0		55	412.2	22.802	8565.57	0
56	244.1	0.674667	0	1492.03	11477.4	7480.71		56	161.2	36.894	8099.32	0		56	301.2	22.9253	8461.42	0
57	373.2	0.680833	897.795	1673.35	2382.71	1460.69		57	282.3	21.492	8075.73	0		57	542.2	9.24267	8441.84	0
58	351	0.685333	705.96	604.815	0	2646.11		58	532.4	27.8005	8012.79	0		58	393.2	18.1055	8425.27	0
59	113.2	0.721	0	1878.76	2229.23	5345.58		59	451.4	21.4821	7911.84	0		59	917.3	7.56783	8349.81	0
60	152	0.734333	0	2792.7	563.736	0		60	370.9	37.284	7844.46	0		60	152.1	18.9242	8275.92	0
61	370.9	1.10667	0	9497.72	6249.41	0		61	551.1	12.9778	7835.2	0		61	849.2	8.199	8271.91	0
62	372	1.216	4410.67	668.356	2540.03	2843.77		62	305.1	36.6388	7672.28	0		62	523.3	19.8938	7869.44	0
63	393.2	1.393	2586.7	0	0	0		63	861.3	9.688	7613.73	0		63	325.1	6.55	7782.52	0
64	371.2	1.41733	3472.15	1883.14	11509.7	8201.98		64	371.2	17.042	7551.46	0		64	353.1	21.4372	7779.31	0
65	392.8	1.464	2248.22	0	0	0		65	393.2	41.006	7452.05	0		65	451.1	7.82917	7758.88	0
66	152.1	1.854	8801.75	2121.88	7822.78	4399.53		66	962.4	15.288	7412.58	0		66	372.1	36.7913	7692.22	0
67	316.3	2.0985	363.497	0	4378.22	396.866		67	319.4	12.488	7245.84	0		67	360.2	36.4422	7673.86	0
68	171.2	2.175	224.72	162.752	0	3775.89		68	454.1	13.5782	7221.78	0		68	371	15.058	7594.68	0
69	372.2	2.29817	1580.47	2658.56	1304.81	5234.47		69	476.3	9.91083	7215.41	0		69	393.2	23.119	7585.36	0
70	111.2	2.35183	1175.76	0	2461.04	2273.77		70	515.2	14.508	7184.68	0		70	654.4	15.3235	7569.46	0
71	245	2.36067	1437.36	0	3362.88	273.269		71	302	17.575	7170.9	0		71	370.9	25.9943	7510.1	0
72	392.9	2.43083	0	0	2670.62	1610.48		72	466.1	9.46283	7145.46	0		72	471.2	7.36067	7361.07	0
73	372	2.53533	846.675	4539.29	2891.33	486.555		73	283.4	23.689	7049.87	0		73	285.3	15.2703	7300.91	0
74	392.8	2.68633	0	0	0	3941.88		74	955.4	15.093	7007.83	0		74	569.2	13.1275	7153.61	0
75	393.2	2.72217	2398.18	0	0	5257.6		75	976.5	10.7055	7007.42	0		75	658.8	7.34317	7145.59	0
76	245.1	2.74583	4240.57	962.51	4968.25	3079.74		76	377.2	36.84	6971.07	0		76	370.9	19.3722	6992.83	0
77	316.1	2.7955	3181.57	3256.46	6119.64	1472.11		77	316.3	2.81925	6926.4	0		77	331.7	9.55483	6976.59	0
78	316.3	2.81925	6926.4	6497.89	0	1580.64		78	247.4	17.273	6878.9	0		78	449.3	28.5935	6954.27	0
79	316.2	2.846	6771.28	5739.42	7521.03	3621.07		79	512.6	26.4243	6858.6	0		79	359.4	12.577	6820.04	0
80	138.1	2.864	5530.67	430.647	0	0		80	357.2	6.19533	6838.12	0		80	857.6	13.262	6790.08	0
81	394	2.953	1473.14	4115.21	819.925	1968.47		81	691.6	23.299	6803.35	0		81	432.1	8.145	6754.23	0
82	316	2.97	715.968	1630.66	0	3692.83		82	504.2	15.271	6803.31	0		82	554.5	20.659	6707.69	0
83	393.1	3.183	7944.53	5078.55	3316.7	4136.44		83	523.4	24.5622	6516.74	0		83	450.2	0.595	6579.94	0
84	261	3.431	3370.8	0	1435.42	0		84	623.3	17.4859	6511.06	0		84	392.9	24.196	6565.52	0
85	359.4	3.71483	0	0	8425.82	1590.81		85	275.1	12.258	6488.18	0		85	691.5	23.2418	6559.33	0
86	373	3.83	5000.18	932.861	5202.25	1320.04		86	736.3	6.161	6457.1	0		86	392.9	11.7077	6536.16	0
87	330.2	3.838	6222.26	2067.5	2854.58	4671.74		87	301.1	25.125	6436.32	0		87	612.3	14.1628	6363.37	0
88	394.2	4.105	2427.56	1215.78	0	0		88	612.3	14.1628	6404.15	0		88	371.9	11.5458	6230.47	0
89	416.1	4.17458	7423.12	2667.46	2835.48	0		89	419.2	10.4769	6334.56	0		89	999.3	13.0945	6222.79	0
90	416.2	4.228	1759.25	3813.88	3085.87	8449.22		90	462.1	8.482	6334.4	0		90	498.3	15.324	6216.83	0
91	223.1	4.3955	848.805	4356.27	1985.12	2565.39		91	468.3	13.8	6287.86	0		91	941.4	14.9653	6190.08	0
92	370	4.424	3006.7	0	0	179.986		92	383.3	7.259	6208.14	0		92	470.2	15.3235	6153.14	0
93	599.5	4.48783	0	3343.75	0	1543.2		93	405.9	9.067	6118.46	0		93	462.2	8.33133	6009.39	0
94	460.4	4.51267	0	0	842.49	2339.04		94	941.3	15.076	6086.22	0		94	592.2	15.903	5993.6	0
95	599.3	4.51317	0	863.555	3396.19	789.048		95	286.2	22.803	6073.72	0		95	420.2	22.1472	5963.81	0
96	460.2	4.524	1536.05	3668.98	917.443	174.394		96	565.6	23.3237	6022.5	0		96	452.2	7.39808	5929.67	0
97	300.1	4.53117	0	1037.23	5697.75	1474.77		97	478.2	14.969	5929.54	0		97	528.4	25.5648	5910.75	0
98	359.4	4.62642	3247.03	4095.7	311.01	0		98	394.1	36.787	5834.24	0		98	321.1	5.05433	5765.33	0
99	460.3	4.63383	1140.45	2784.69	0	531.218		99	370.9	21.598	5829.12	0		99	526.4	28.2468	5696.01	0
100	151.9	4.85083	0	457.856	3513.31	0		100	312.1	15.1365	5711.79	0		100	497.1	14.6403	5652.81	0
101	395.2	4.90433	0	0	898.02	2817.63		101	595.3	12.08	5705.77	0		101	151.9	15.7855	5562.82	0
102	321.2	5.026	7896.98	1279.27	495.438	2278.25		102	528.4	28.652	5677.45	0		102	273.8	7.37717	5547.19	0
103	337.2	5.044	3709.96	2053.63	442.146	0		103	478.8	15.005	5650.04	0		103	284.3	23.2597	5533.23	0
104	370.1	5.044	8797.79	2921.62	248.229	388.863		104	567.3	15.341	5648.97	0		104	321.1	16.6345	5510.88	0
105	321.1	5.05433	0	5765.33	179.53	0		105	605.3	16.83	5612.81	0		105	152.2	42.7073	5507.68	0
106	394.2	5.168	5443.21	577.004	1806.03	663.728		106	548.3	12.133	5598.7	0		106	433.2	13.772	5474.28	0
107	370	5.18117	717.024	2974.36	0	0		107	138.1	2.864	5530.67	0		107	284.8	15.0018	5464.8	0
108	359.3	5.1995	743.37	3912.48	0	790.532		108	432.2	8.429	5512	0		108	430.1	5.37967	5374.18	0
109	284.1	5.27517	2900.32	0	3116.4	2199.21		109	360.4	26.175	5482.22	0		109	379.3	25.1733	5333.86	0
110	284	5.29017	5168.45	11438.1	1461.16	199.454		110	399.1	10.485	5462.02	0		110	543.2	10.3777	5314.06	0
111	322	5.30058	0	6744.64	2729.3	11664.3		111	375.3	11.106	5395.54	0		111	297.4	10.6148	5301.5	0
112	306.1	5.30225	12357.8	6394.98	5879.78	4259.2		112	653.3	9.209	5379.12	0		112	849.3	8.145	5272.45	0
113	306.2	5.3075	1344.05	11322.4	1169.29	286.496		113	477.3	12.718	5367.6	0		113	263.1	36.734	5242.83	0
114	241.1	5.32583	687.669	7039.65	0	1686.37		114	367	9.369	5366.54	0		114	186.9	36.6663	5238.82	0
115	322.1	5.328	12998.7	12740.2	12380.6	3441.96		115	941.4	14.9653	5343.58	0		115	305.1	36.6388	5195.06	0
116	430.1	5.37967	0	5374.18	0	0		116	365	0.489	5338.08	0		116	718.8	15.2703	5122.47	0
117	372.1	5.38167	6400.65	8999.67	5325.87	5676.29		117	593.4	16.068	5311.16	0		117	465.4	24.851	5112	0
118	452.3	5.43433	0	0	3728.02	0		118	428.2	7.189	5293.03	0		118	394.3	19.9122	5105.76	0
119	468.3	5.48683	0	3323.42	511.503	0		119	471.2	15.04	5261.68	0		119	477.2	9.86633	5035.44	0
120	431.3	5.48833	1478.7	5948.28	1464.05	8961.16		120	379.1	28.51	5255.48	0		120	940.3	14.9298	5006.5	0
121	430.2	5.496	95370.3	77640.7	43129.4	56225.9		121	458.1	8.163	5242.33	0		121	431.2	11.9223	4995.6	0
122	452.2	5.50483	11208.8	13266.7	5975.36	6875.86		122	468.2	14.562	5225.65	0		122	481.2	28.4843	4968.22	0
123	468.2	5.505	3448.97	0	1938.2	10418.1		123	508	9.528	5216.54	0		123	723.1	27.1717	4964.85	0
124	241.2	5.52317	1985.42	3943.2	2745.5	1044.18		124	233.1	9.21792	5213.6	0		124	582.6	22.6785	4935.74	0
125	431.2	5.54	15964.4	13598.2	11300.7	6250.25		125	263.3	21.687	5198.26	0		125	302.1	17.184	4928.82	0
126	371.1	5.59383	15298.2	28208.7	24601.3	15681		126	249.3	15.217	5175.05	0		126	429.4	24.4163	4922.18	0
127	468.1	5.59383	4699.15	2507.66	3804.22	0		127	311.2	9.245	5171.82	0		127	451.4	21.4821	4909.92	0
128	452.1	5.61167	0	3532.94	0	2586.12		128	566.1	12.045	5117.68	0		128	512.3	26.6883	4905.09	0
129	430.3	5.64592	7359.22	2788.69	10521.9	0		129	360.3	36.699	5115.26	0		129	939.4	18.5315	4865.98	0
130	372.2	5.67917	4704.54	1800.3	3287.33	4281.34		130	331.4	21.1157	5095.42	0		130	883.4	7.53367	4805.28	0
131	241	5.7165	1486.96	5799.99	1035.76	659.869		131	380.4	28.475	5083.76	0		131	313.3	14.969	4758.39	0
132	241.1	5.771	3264.88	0	1349.62	1436.52		132	277.2	8.961	5062.39	0		132	317.1	7.86467	4739.03	0
133	241.2	5.78667	1098.02	3676.06	887.61	2860.07		133	447	9.262	4978.82	0		133	362.3	8.11017	4724.13	0
134	291	5.839	0	3673.8	0	291.995		134	196.1	36.876	4966.09	0		134	713.5	6.15217	4704.48	0
135	372.8	5.90783	415.35	0	0	2578.75		135	371.8	18.886	4958.23	0		135	542.1	8.752	4695.7	0
136	440.1	5.961	0	3446.34	0	0		136	436.1	10.627	4956.04	0		136	452.1	15.8558	4692.76	0
137	751.4	6.12267	0	4258.12	5633.56	2382.89		137	439.2	19.8583	4948.66	0		137	370.9	16.139	4680.44	0
138	713.3	6.125	6122.95	0	1044	792.891		138	359.4	17.025	4932.02	0		138	285.4	22.9958	4631.92	0
139	357.9	6.12817	0	911.531	7390.15	0		139	513.2	15.483	4907.02	0		139	418.1	8.19767	4607.53	0
140	357.3	6.143	16395.6	4430.93	24405.3	21344		140	390.1	13.037	4894.11	0		140	483.1	22.0055	4591.33	0
141	736.4	6.14858	799.855	4403.05	4441.6	3394.81		141	632.3	15.962	4877.77	0		141	261.2	36.5023	4586.21	0
142	713.4	6.14867	2641.64	4440.84	5287.7	3989.49		142	519.2	8.287	4867.64	0		142	310	9.4265	4576.39	0
143	735.5	6.1515	0	0	0	4587.29		143	455	8.27	4823.09	0		143	356.3	20.003	4480.58	0
144	713.5	6.15217	0	4704.48	0	0		144	598.1	13.002	4810.49	0		144	316.9	7.56783	4467.25	0
145	735.4	6.15217	8470.5	11414.5	7583.33	1902.55		145	348	8.146	4784	0		145	639.2	15.6253	4449.57	0
146	736.3	6.161	6457.1	1959.85	0	0		146	232.1	37	4764.35	0		146	394.2	26.3138	4444.87	0
147	152.1	6.18683	2315.81	0	1467.82	3725.9		147	555.2	9.351	4732.99	0		147	347.4	16.352	4438.49	0
148	357.2	6.19533	6838.12	30141	0	7704.08		148	555.2	14.1353	4722.21	0		148	908.3	7.46417	4427.62	0
149	735.3	6.21758	2982.38	2954.31	3724.31	523.782		149	412.2	10.556	4705.34	0		149	455.4	19.7497	4389.44	0
150	393.2	6.273	0	0	0	5136		150	470.2	10.414	4703.6	0		150	479.3	24.0972	4363.3	0
151	333.4	6.28183	0	0	3721.11	0		151	441.1	15.2	4697.31	0		151	540.5	28.6052	4351.34	0
152	293.3	6.285	4149.25	0	0	192.511		152	548.1	12.151	4697.02	0		152	152.1	37.011	4284.96	0
153	308.2	6.285	4037.41	168.61	0	0		153	956.3	15.04	4664.53	0		153	259.2	11.1267	4273.49	0
154	332.9	6.31717	551.623	3433.42	667.935	2527.96		154	359.1	6.94	4661.82	0		154	509.1	11.9043	4220.83	0
155	332.8	6.338	3091.86	0	0	0		155	245	36.858	4602.01	0		155	537.4	25.1053	4217.53	0
156	434.1	6.35533	3964.99	3561.7	3764.06	2589.16		156	441.3	15.554	4600.99	0		156	260.9	15.9095	4209.26	0
157	313.1	6.37575	4391.49	5175.47	761.519	548.465		157	497.4	22.325	4566.48	0		157	347.2	36.4625	4209.22	0
158	854.7	6.391	3013.58	0	0	0		158	675.4	12.949	4563.3	0		158	393.9	20.5233	4204.66	0
159	371.9	6.39417	0	2534.4	0	0		159	309.2	11.4307	4544.96	0		159	437.3	14.5138	4194.13	0
160	434.2	6.39417	4204.62	11555	922.699	0		160	373.2	43.753	4533.22	0		160	378.4	19.84	4176	0
161	395.1	6.42933	2816.92	5064.68	0	356.596		161	263.1	21.545	4500.25	0		161	409.2	20.2533	4148.11	0
162	828.9	6.52083	0	0	2625.78	0		162	568.4	25.604	4476.78	0		162	532.4	27.8005	4139.83	0
163	325.3	6.52083	9672.5	2739.42	14041.6	3838.32		163	432	7.242	4455.5	0		163	366.4	28.5065	4138.77	0
164	325.1	6.55	0	7782.52	0	0		164	497.2	21.066	4424.01	0		164	419.4	22.784	4118.57	0
165	326.2	6.58417	3007.22	4833.16	0	1329.01		165	357.1	21.793	4313.84	0		165	783.4	10.5778	4112.06	0
166	325.2	6.621	33211.1	9549.85	2962.47	14251.7		166	337.1	19.95	4253.48	0		166	359.4	4.62642	4095.7	0
167	359.4	6.65767	1263.09	0	3536.16	0		167	493.4	24.4127	4236.85	0		167	324.1	13.333	4078.43	0
168	537.2	6.67067	5758.66	12131.8	4393.7	1796.84		168	373.2	17.132	4171.71	0		168	659.8	7.34317	4039.54	0
169	395.1	6.69233	4575.83	6861.7	8975.55	1966.83		169	297.8	10.698	4166.23	0		169	547.6	23.14	4035.15	0
170	416.1	6.726	816.2	7585.85	5682.03	3653.63		170	479.2	14.952	4154.71	0		170	297.3	17.9635	4033.85	0
171	395.2	6.73967	3712	5317.57	0	1837.04		171	293.3	6.285	4149.25	0		171	279.1	16.387	4014.22	0
172	394.1	6.745	11668	19950.9	4541.16	5600.83		172	511.4	26.33	4144.91	0		172	631.3	15.0563	4005.86	0
173	537.1	6.75633	0	4180.15	231.947	993.499		173	497.2	8.323	4142.86	0		173	175.1	36.6255	4005	0
174	394.2	6.76558	5199.74	9758.6	11213.8	7578.41		174	557.4	9.404	4128.7	0		174	281.4	7.55133	4000.44	0
175	416.2	6.79133	1669.92	2573.88	350.221	506.485		175	433.3	22.838	4120.48	0		175	498	15.092	3984.71	0
176	261	6.8455	0	607.352	2989.33	1365.36		176	305.3	9.776	4117.29	0		176	379.3	28.666	3984.65	0
177	371	6.852	26712.8	11188.3	22865.1	0		177	955.3	15.324	4109.89	0		177	467.1	9.53117	3981.46	0
178	928.3	6.89433	662.5	3355.44	396.541	0		178	578.6	25.869	4087.55	0		178	555.3	9.46267	3972.96	0
179	929.1	6.92933	0	2954.74	0	0		179	396.1	24.2753	4080.01	0		179	295	15.5012	3968.71	0
180	359.1	6.94	4661.82	754.863	0	0		180	675.3	12.86	4068.52	0		180	420.3	22.1295	3904.97	0
181	394	6.94583	0	3709.16	0	0		181	514.2	9.953	4054.45	0		181	508.2	19.9477	3903.87	0
182	413.1	6.9485	468	907.01	1772.56	5404.94		182	308.2	6.285	4037.41	0		182	451.2	24.3913	3876.3	0
183	486.2	6.9485	938.772	873.823	0	3131.89		183	364	9.475	4035.29	0		183	189	36.7712	3871.64	0
184	486.1	6.96333	2640.54	12081.5	3573.89	3429.37		184	375	36.84	4027.99	0		184	498.1	14.987	3854.99	0
185	434.1	6.98083	3936.65	3387.76	0	0		185	279.5	7.454	4025.7	0		185	497.3	28.6293	3851.79	0
186	275.1	7.084	1892.35	2908.64	0	457.206		186	397.2	18.957	3961.65	0		186	295.2	15.3767	3846.74	0
187	152.2	7.119	1912.66	5375.06	792.215	2820.65		187	507.3	9.883	3952.77	0		187	379.1	28.51	3840.53	0
188	383.2	7.18717	3087.59	9798	5150.54	3112.05		188	647.3	12.045	3937.82	0		188	482.2	28.2783	3836.74	0
189	428.2	7.189	5293.03	1749.67	0	0		189	434.1	6.98083	3936.65	0		189	289.1	9.3345	3830.11	0
190	373.2	7.23967	1225.31	8528.4	0	523.051		190	527.5	28.8103	3921.94	0		190	233.1	9.21792	3792.4	0
191	432	7.242	4455.5	0	0	0		191	523.1	19.879	3880.53	0		191	371	25.0213	3777.07	0
192	223.1	7.25633	1787.73	3110.87	286.848	0		192	365.4	21.474	3870.93	0		192	110.9	39.1697	3775.93	0
193	383.3	7.259	6208.14	0	0	4105.28		193	152	38.613	3835.08	0		193	196	36.6047	3774.36	0
194	315.9	7.27467	190.391	664.832	8681.4	0		194	292.9	15.147	3784.99	0		194	509.4	16.352	3772.08	0
195	317.1	7.29133	0	7648.52	0	1044.42		195	377.9	9.936	3753.46	0		195	666.7	7.34317	3763	0
196	334.2	7.29133	197.025	2268.29	0	0		196	451.2	7.36325	3747.74	0		196	472.1	7.36067	3742.93	0
197	888.3	7.308	0	8700.48	0	0		197	373	13.356	3735.94	0		197	439.4	19.6549	3741.02	0
198	281.6	7.308	0	3352.45	532.38	1808.44		198	205	17.61	3733.89	0		198	394	6.94583	3709.16	0
199	471	7.32783	0	0	0	2888.85		199	535.3	13.6568	3732.93	0		199	359	20.1823	3701.69	0
200	348	7.34317	0	3394.15	0	0		200	395.2	6.73967	3712	0		200	372.2	11.2185	3697.42	0
201	497.4	7.34317	0	3127	0	0		201	431	12.47	3705.14	0		201	395.2	28.472	3676.26	0
202	658.8	7.34317	0	7145.59	0	0		202	547.5	28.794	3703.37	0		202	319.2	17.805	3672.32	0
203	659.8	7.34317	0	3617.17	0	0		203	770.4	10.467	3700.06	0		203	426.1	11.368	3661.78	0
204	666.7	7.34317	0	15166.4	0	0		204	654.4	15.3235	3684.44	0		204	412.2	10.556	3640.9	0
205	883.9	7.34317	0	3763	0	0		205	359.1	41.785	3679.26	0		205	151.9	13.3977	3631.25	0
206	908.2	7.34317	0	4039.54	0	0		206	302.3	17.663	3678.19	0		206	883.9	7.34317	3617.17	0
207	454.1	7.34317	41807.5	191398	63106.1	35343.2		207	631.3	15.0563	3674.86	0		207	532.3	14.1805	3595.96	0
208	456.2	7.34317	3098.98	21390.5	3530.98	2018.32		208	635.3	10.432	3650.4	0		208	565.6	23.3237	3589.34	0
209	882.3	7.34317	162.736	14111.2	0	0		209	382.3	36.716	3630.59	0		209	620.3	13.3977	3570.14	0
210	887.3	7.34367	831.972	48111.3	0	2580.86		210	508.3	9.528	3582.66	0		210	393.8	25.292	3537.19	0
211	455.1	7.34375	0	42196.5	4092.83	12256.9		211	352.1	10.875	3557.1	0		211	395.1	25.1733	3509.09	0
212	450.9	7.34433	0	0	0	2722.33		212	528.4	25.5648	3549.35	0		212	605.3	16.83	3507.45	0
213	456.3	7.34433	0	0	0	3998.41		213	690	9.723	3546.76	0		213	544.5	21.5798	3499.06	0
214	454.2	7.35492	48254.4	145306	0	78332.9		214	372.3	15.253	3515.42	0		214	521.2	10.98	3492.55	0
215	362.1	7.36067	0	10807.6	722.517	638.53		215	432.1	8.145	3507.43	0		215	440.1	5.961	3446.34	0
216	471.2	7.36067	4043.9	12667.1	930.898	638.496		216	354	28.776	3491.64	0		216	547.2	28.7387	3428.28	0
217	472.1	7.36067	650.715	9079.93	1138.48	235.016		217	507.3	19.9293	3482.39	0		217	265.3	23.3647	3415.34	0
218	886.3	7.36067	5582.93	202312	2024.96	0		218	542.4	19.282	3475.3	0		218	419.9	10.45	3411.01	0
219	874.2	7.36067	159.75	7361.07	0	0		219	284.8	15.0018	3464.45	0		219	908.2	7.34317	3394.15	0
220	943.2	7.36067	594.27	3742.93	0	0		220	633.1	25.125	3451.36	0		220	316	7.46417	3389.45	0
221	885.3	7.36125	0	403537	3367.99	23898.8		221	548.3	28.5606	3431.22	0		221	434.1	6.98083	3387.76	0
222	359.4	7.36183	0	0	0	3867.07		222	753.4	23.122	3397.33	0		222	580.4	21.0666	3387.7	0
223	451.2	7.36325	3747.74	16385.3	0	0		223	511.1	16.157	3388.76	0		223	928.3	6.89433	3355.44	0
224	455.2	7.364	29191.2	30806.5	14191.3	27781.6		224	781.2	10.786	3387.7	0		224	471.2	10.2873	3343.91	0
225	470.2	7.366	9340.8	48445.4	4207.85	1736.18		225	428.3	15.3587	3387.65	0		225	313.1	15.0018	3331.32	0
226	874.8	7.37717	0	5547.19	0	0		226	513.4	28.457	3386.12	0		226	468.3	5.48683	3323.42	0
227	273.8	7.37717	0	5158.02	430.631	722.569		227	262.1	36.947	3383.53	0		227	405.3	11.1813	3321.73	0
228	281.7	7.37717	2077.82	3530.67	446.101	646.634		228	495.3	21.9703	3382.46	0		228	410.3	15.2342	3312.94	0
229	888.2	7.37717	431.836	16335	0	0		229	988.4	9.103	3346.42	0		229	525.2	24.2193	3310.8	0
230	886.2	7.37933	8946.29	87227.6	3849.75	13985.8		230	110.9	10.733	3345.36	0		230	556.1	11.3042	3280.62	0
231	421.1	7.384	5072.76	270.107	557.404	0		231	371	25.0213	3335.25	0		231	308.1	9.00583	3278.88	0
232	456.1	7.384	2409.41	1453.35	0	0		232	546.3	28.989	3313.73	0		232	247.4	17.273	3278.48	0
233	659.9	7.39483	0	2559.74	0	0		233	718.3	15.1375	3310.25	0		233	371	13.0605	3261.4	0
234	883.3	7.39483	0	12832.8	0	0		234	382.2	36.663	3309.73	0		234	188.1	36.6663	3244.58	0
235	451.1	7.39483	1061.06	20385.6	0	0		235	359.4	43.186	3302.26	0		235	499.2	12.0102	3241.38	0
236	316.1	7.39583	18601.3	83548.8	1693.41	28416.5		236	382.1	10.432	3299.78	0		236	285.2	22.8198	3216	0
237	452.2	7.39808	2812.18	5929.67	195.029	0		237	411.2	22.715	3294.78	0		237	375.3	30.7593	3205.07	0
238	885.2	7.401	35573.8	205373	1600.65	2546.52		238	279.3	15.607	3292.5	0		238	269.2	0.646917	3198.94	0
239	887.2	7.41233	449.44	49911.9	0	832.458		239	429.1	7.508	3274.2	0		239	363.1	36.5023	3196.01	0
240	667.8	7.41233	0	3479.54	0	754.629		240	571.3	12.151	3262.39	0		240	470.3	15.005	3187.25	0
241	470.1	7.41667	7511.4	22057.2	862.25	12402.5		241	406.2	12.6487	3232.42	0		241	548.3	28.5606	3183.88	0
242	261.2	7.419	4108.8	0	1742.62	0		242	512.4	26.812	3221.14	0		242	407.3	21.686	3152.74	0
243	323.5	7.43	465.405	4525.12	377.947	516.535		243	427.2	9.546	3220.56	0		243	454.1	7.34317	3127	0
244	323.4	7.43892	721.968	4726.54	0	4179.58		244	404	7.632	3216.3	0		244	223.1	7.25633	3110.87	0
245	279.5	7.454	2637.55	0	0	0		245	533.4	27.908	3193.65	0		245	468.1	9.28	3100.73	0
246	325.1	7.454	4025.7	376.974	0	623.957		246	948.5	13.746	3149.53	0		246	295.4	20.2178	3074.97	0
247	908.3	7.46417	0	3389.45	0	0		247	375.4	24.93	3112.05	0		247	440.3	21.5725	3064	0
248	316	7.46417	3606.44	61960.5	5198.59	6124.07		248	332.8	6.338	3091.86	0		248	319.4	12.488	3049.87	0
249	574.2	7.46417	1001.78	5448.4	2376.19	977.814		249	406.1	10.7007	3081.35	0		249	152	15.448	3030.72	0
250	324.1	7.46417	2859.52	4427.62	0	0		250	721.9	15.076	3029.33	0		250	277.1	10.7055	3030.54	0
251	279.7	7.46483	0	2116.4	292.548	2190.47		251	987	8.022	3028.1	0		251	249.3	15.217	3023.53	0
252	315.8	7.4655	0	0	4721.24	0		252	437	14.739	3024.18	0		252	474.4	22.784	3011.76	0
253	413.3	7.48183	0	3291.95	790.095	325.627		253	384.4	12.4544	3017.1	0		253	482.3	28.5752	2990.88	0
254	324.3	7.48233	0	0	473.661	2099.33		254	854.7	6.391	3013.58	0		254	370	5.18117	2974.36	0
255	281.3	7.49833	1280.13	2462.93	0	0		255	297.7	10.45	3012.52	0		255	301.1	26.2605	2961.12	0
256	429.1	7.508	3274.2	0	0	290.633		256	484.5	21.775	3010.69	0		256	929.1	6.92933	2954.74	0
257	404.1	7.516	869.982	10530.8	0	0		257	326.2	6.58417	3007.22	0		257	441.3	15.554	2908.29	0
258	883.4	7.53367	0	4805.28	0	0		258	370	4.424	3006.7	0		258	268.7	0.577167	2900.54	0
259	281.4	7.55133	294.411	2580.5	0	281.532		259	362.2	12.752	3001.51	0		259	542.4	19.282	2885.79	0
260	275	7.55133	0	4000.44	1096.95	0		260	152.3	8.518	2999.09	0		260	393.9	36.6453	2881.41	0
261	412.2	7.561	5100.14	2800.98	872.182	0		261	382.3	9.936	2992.7	0		261	582.4	11.035	2874.36	0
262	917.3	7.56783	0	8349.81	0	0		262	495.4	25.869	2969.04	0		262	379.4	22.2392	2869.74	0
263	316.9	7.56783	178.356	4467.25	0	0		263	525.5	28.67	2969.04	0		263	437.2	11.419	2861.17	0
264	361.2	7.5875	3254.64	2237.29	3502.02	1197.59		264	359.2	36.734	2967	0		264	718.3	15.1375	2841.91	0
265	404	7.632	3216.3	0	0	0		265	553.3	25.178	2960	0		265	555.4	9.35317	2827.57	0
266	377.2	7.791	6576.82	1368.58	3281.76	2013.39		266	110.9	22.272	2957.29	0		266	419.4	22.6077	2812.13	0
267	512.1	7.79233	0	0	738.557	4175.34		267	380.1	21.846	2936.2	0		267	412.2	7.561	2800.98	0
268	303.3	7.79883	374.18	1235.6	3070.59	0		268	582.4	11.035	2927.68	0		268	152	0.734333	2792.7	0
269	511.1	7.80983	0	0	0	7657.89		269	293.3	15.678	2926.66	0		269	430.3	5.64592	2788.69	0
270	455	7.82733	1210.52	0	1653.71	4174.81		270	324.3	13.339	2919.24	0		270	206	0.5595	2786.41	0
271	451.1	7.82917	706.8	7758.88	0	0		271	433.2	13.772	2917.78	0		271	668.3	9.02433	2777.25	0
272	472.1	7.82917	0	3521.95	0	162.225		272	381.4	21.97	2917.54	0		272	861.3	9.688	2769.62	0
273	511.3	7.83383	0	0	10089.8	0		273	457.1	8.27	2899.99	0		273	373.3	17.219	2753.11	0
274	317.1	7.86467	0	4739.03	0	0		274	850.3	8.234	2899.47	0		274	574.2	11.4363	2737.92	0
275	279.4	7.8815	3153.85	16350.5	1871.32	1396.68		275	499.1	15.235	2869.72	0		275	613.3	13.5002	2724.48	0
276	316.2	7.8955	0	0	1034.66	4394.49		276	908.3	7.46417	2859.52	0		276	557.4	9.404	2722.48	0
277	511.2	7.8955	0	0	4158.41	10036.6		277	187	36.894	2859.52	0		277	856	9.68317	2722.08	0
278	316	7.897	10286.4	13510.1	2125.97	1280.2		278	498.1	14.987	2857.99	0		278	196.1	36.876	2717.29	0
279	455.1	7.897	14933.5	9878.93	1428.39	2866.74		279	941.5	15.412	2856.9	0		279	377.1	20.8832	2716.78	0
280	470.2	7.933	7827.75	16036.6	1496.15	0		280	104	0.507	2851.61	0		280	362.1	36.6047	2687.1	0
281	152.2	8.004	4657.25	1372.61	742.478	0		281	397.2	21.669	2834.44	0		281	532.3	27.763	2684.95	0
282	987	8.022	3028.1	0	0	0		282	395.1	6.42933	2816.92	0		282	293.7	15.0373	2675	0
283	293.3	8.039	2266.3	0	0	0		283	654.5	9.209	2804.76	0		283	405.9	9.067	2672.25	0
284	470.1	8.04833	1221.55	11587.9	3392	2124.61		284	421	10.733	2797.34	0		284	416.1	4.17458	2667.46	0
285	348.1	8.07433	2009.86	16381.5	0	592.321		285	289.1	9.3345	2794.25	0		285	371.9	40.5403	2666.8	0
286	376.2	8.09217	11691.8	2377.58	0	190.438		286	372	29.822	2787.8	0		286	495.4	13.0762	2663.23	0
287	362.3	8.11017	0	2293.63	0	0		287	638.2	17.9275	2764.96	0		287	110.9	16.971	2662.72	0
288	477.3	8.11017	0	4724.13	0	0		288	849.2	8.199	2762.36	0		288	300.9	22.6605	2632.62	0
289	457.2	8.11025	8325.33	4420.27	235.841	1514.47		289	419.2	26.6956	2760.6	0		289	552.4	11.4907	2627.28	0
290	432.1	8.145	3507.43	6754.23	0	0		290	566.4	23.158	2754.05	0		290	998.2	13.262	2619.26	0
291	849.3	8.145	626.58	5272.45	0	0		291	538.2	25.107	2751.17	0		291	319.3	16.4758	2610.78	0
292	348	8.146	4784	3082.15	0	222.834		292	581.2	22.7145	2743.49	0		292	395	36.6047	2604.85	0
293	394.1	8.146	11759.7	11017.9	7202.44	2615.06		293	713.3	23.034	2735.99	0		293	110.9	24.2018	2562.91	0
294	455.1	8.146	12294.9	12300.7	450.679	2027.09		294	582.3	22.892	2735.15	0		294	451.1	7.39483	2559.74	0
295	458.1	8.163	5242.33	1972.74	0	348.582		295	395	23.938	2734.08	0		295	412.3	10.5603	2551.45	0
296	432.9	8.163	2745.62	0	168.036	0		296	396.9	9.829	2733.67	0		296	468.2	14.562	2546.88	0
297	419	8.18083	1854.05	2859.09	0	264.152		297	453.4	15.9802	2719.13	0		297	292.8	15.1988	2546.02	0
298	359.3	8.181	7702.69	1028.99	3832.63	2720.33		298	419.2	8.305	2709.52	0		298	498.4	15.536	2541.46	0
299	377.3	8.181	3407.96	0	235.911	0		299	629.2	13.445	2704.42	0		299	111.1	26.492	2540.23	0
300	418.1	8.19767	13013.6	13364.4	1508.65	5614.94		300	373.3	14.012	2696.64	0		300	461.3	15.0018	2537.57	0
301	275.2	8.19767	0	4607.53	1132.22	0		301	608.3	12.151	2692.43	0		301	434.2	6.39417	2534.4	0
302	849.2	8.199	2762.36	0	0	0		302	481.1	21.208	2691.36	0		302	498.2	23.1715	2528.1	0
303	455.2	8.199	7801.74	8271.91	1353.47	0		303	245.3	37.957	2670.96	0		303	481.4	28.5935	2520.68	0
304	399.2	8.20742	13764.8	10634.9	5261.39	5175.02		304	261.2	38.4222	2648.63	0		304	363.2	12.6112	2517.5	0
305	400.2	8.23367	680.535	3009.62	387.348	802.723		305	325.1	7.454	2637.55	0		305	371.1	5.59383	2507.66	0
306	850.3	8.234	2899.47	0	0	0		306	151.8	9.103	2626.68	0		306	476.1	10.1772	2494.85	0
307	400.1	8.234	2380.57	0	457.952	284.139		307	281.2	16.6175	2623.09	0		307	478.8	15.005	2489.06	0
308	399.1	8.24083	4129.76	2091.76	2087.86	6717.15		308	414.2	25.728	2612.94	0		308	904.6	11.3462	2467.42	0
309	470.9	8.252	2152.13	0	0	0		309	652.4	13.2117	2604.42	0		309	281.3	7.49833	2462.93	0
310	396.1	8.25833	5675.24	1950.24	1243.41	4154.71		310	393.2	1.393	2586.7	0		310	521.3	11.072	2459.2	0
311	396.2	8.26667	8731.01	2233.71	0	2566.26		311	343.2	23.246	2582.78	0		311	152.3	44.6363	2450.98	0
312	455	8.27	4823.09	0	0	0		312	534	9.595	2564.14	0		312	359.3	36.4625	2437.25	0
313	457.1	8.27	2899.99	1073.58	0	158.419		313	609.2	14.048	2550.38	0		313	882.9	11.9403	2436.39	0
314	359.4	8.275	0	0	0	3138.43		314	910.1	9.723	2540.82	0		314	537.2	25.1582	2417	0
315	519.2	8.287	4867.64	0	0	0		315	373	16.316	2531.55	0		315	309.2	11.4307	2411.9	0
316	419.2	8.305	2709.52	1256.52	0	367.195		316	625.1	13.25	2531.28	0		316	535	0.577167	2391.36	0
317	497.2	8.323	3615.67	439.72	189.454	0		317	226.9	36.77	2529.02	0		317	301.1	25.125	2382.45	0
318	463.2	8.323	4142.86	823.342	0	0		318	293.2	15.022	2524.75	0		318	453.4	20.6318	2379.5	0
319	462.2	8.33133	14790.7	6009.39	0	0		319	937.1	10.981	2511.29	0		319	261.1	36.6453	2365.62	0
320	484.2	8.341	5348.76	877.384	885.363	0		320	888.7	12.665	2486.76	0		320	525.5	28.67	2360.33	0
321	400.3	8.341	4783.25	0	886.423	0		321	393.9	21.811	2480.96	0		321	395.3	14.7668	2344.26	0
322	367.3	8.36167	0	0	0	234413		322	521.2	10.98	2477.22	0		322	961.3	15.0738	2321.09	0
323	399.3	8.36167	14345.5	0	4290.16	8903.55		323	281	22.36	2447.81	0		323	498.2	11.495	2314.41	0
324	369.2	8.37583	18033.2	32023.1	23029.7	9631.25		324	394.2	4.105	2427.56	0		324	459.4	25.8742	2307.95	0
325	368.3	8.38742	59203.6	100392	30312.4	9421.28		325	152.4	40.509	2422.22	0		325	359.4	17.025	2307.6	0
326	455.3	8.41333	0	0	994.489	3339.99		326	260.9	8.5	2413.68	0		326	360	36.6875	2295.13	0
327	432.2	8.429	5512	1342.02	0	0		327	421.1	7.384	2409.41	0		327	477.3	8.11017	2293.63	0
328	367.2	8.42983	1.74993e+06	1.29938e+06	625071	451508		328	393.2	2.72217	2398.18	0		328	261.2	11.7795	2283.07	0
329	368.2	8.43017	365772	303079	141023	178082		329	831.3	10.68	2383.94	0		329	352	10.944	2281.25	0
330	471.2	8.44933	2910.76	290.934	3078.92	1559.01		330	378.1	30.247	2361.68	0		330	282.4	21.1692	2278.04	0
331	769.4	8.45542	3869.51	7510.38	206.342	906.126		331	376.4	21.882	2344.26	0		331	317.1	7.29133	2268.29	0
332	369.3	8.46417	36200.6	25297.5	964.827	11141.6		332	959.8	16.706	2336.24	0		332	512.5	17.29	2260.9	0
333	462.1	8.482	6334.4	0	0	0		333	659.3	9.085	2323.52	0		333	246.1	36.6255	2244.94	0
334	770.4	8.482	4708.46	194.493	699.699	999.415		334	350.2	9.617	2314.36	0		334	152	13.091	2239.14	0
335	403.1	8.48617	25426.2	21830.4	8561.1	8993.26		335	152.1	18.124	2303.68	0		335	586.3	12.186	2235.32	0
336	260.9	8.5	0	0	2249.99	3767.4		336	638.1	19.046	2287.66	0		336	390.2	11.212	2234.41	0
337	369.1	8.5	0	0	2678.7	5903.04		337	308.2	9.067	2280.96	0		337	354.4	29.4078	2233.25	0
338	433.4	8.5	2413.68	0	0	218.887		338	852.9	11.655	2274.76	0		338	366.3	28.351	2224.1	0
339	404.1	8.51767	1670.97	7952.81	870.106	547.552		339	245	38.453	2273.77	0		339	482.2	15.005	2216.47	0
340	152.3	8.518	2999.09	422.217	0	0		340	293.3	8.039	2266.3	0		340	479.2	14.952	2175.81	0
341	444.3	8.553	2617.67	0	180.537	0		341	392.8	1.464	2248.22	0		341	352.1	10.875	2149.01	0
342	403.2	8.569	0	1965.37	467.588	4187.73		342	626.8	12.063	2243.87	0		342	111	41.1433	2104.33	0
343	403.9	8.569	0	0	184.22	3454.79		343	110.9	29.928	2243.87	0		343	303.6	12.0638	2089.01	0
344	404.2	8.571	9864.03	622.446	0	206.219		344	350.3	10.804	2214.34	0		344	337.2	5.044	2053.63	0
345	152.2	8.589	3766.72	1027.97	4687.74	1776.57		345	470.9	8.252	2152.13	0		345	393.2	41.006	1978.78	0
346	542.2	8.61583	15930.1	17862.2	3069.65	484.265		346	483.4	21.616	2152.02	0		346	482	9.564	1969.8	0
347	394.2	8.64417	14993	16317.9	1541.64	2193.39		347	151.8	41.945	2134.18	0		347	736.3	6.161	1959.85	0
348	368.1	8.654	0	0	0	10775.4		348	668.3	9.02433	2126.36	0		348	528.4	28.652	1958.25	0
349	416.2	8.67983	1135.13	6533.38	0	181.523		349	941.7	16.299	2097.55	0		349	335.2	11.7827	1950.48	0
350	416.1	8.695	9292.98	609.474	0	326.619		350	382.3	30.6818	2086.83	0		350	111	37.0598	1881.42	0
351	310.2	8.69533	7369.2	19056.7	12870.4	7974.27		351	783.4	10.5778	2051.2	0		351	111	29.361	1855.83	0
352	367.3	8.713	176721	0	8452.54	5551.61		352	419.4	22.6077	2027.76	0		352	578.6	25.869	1831.55	0
353	543.2	8.713	9087.43	1372.33	395.666	159.213		353	999.3	13.0945	2020.49	0		353	533.4	27.908	1830.36	0
354	309.2	8.73208	169312	94880.2	49129.3	46339.1		354	348.1	8.07433	2009.86	0		354	111.2	15.944	1816.03	0
355	542.1	8.752	2658.48	4695.7	186.607	0		355	431.2	11.9223	1964.18	0		355	428.2	7.189	1749.67	0
356	499.1	8.77267	224.715	0	4457.6	636.244		356	723.1	27.1717	1937.07	0		356	511.4	26.33	1747.47	0
357	498.1	8.81217	338.67	464.354	8142.99	0		357	262.1	36.6453	1918.46	0		357	513.1	11.442	1737.92	0
358	310.3	8.83083	7210.03	0	6808.54	0		358	275.1	7.084	1892.35	0		358	394.1	36.787	1737.33	0
359	498.2	8.84233	1405.03	647.082	559.248	6320.13		359	419	8.18083	1854.05	0		359	379.4	24.327	1727.68	0
360	309.1	8.85983	0	0	0	8955.94		360	261.2	11.7795	1815.26	0		360	567.3	15.341	1696.58	0
361	394	8.86033	578.194	5220.63	1020.13	643.714		361	425.3	10.4145	1733.82	0		361	675.4	22.041	1671.6	0
362	512.2	8.86625	0	0	794635	844157		362	379.3	28.666	1675.11	0		362	361.2	26.4371	1596.15	0
363	513.2	8.87558	0	0	270171	290774		363	319.3	16.4758	1672.7	0		363	478.2	14.969	1542.14	0
364	534.1	8.87733	0	0	2944.14	3709.69		364	451.2	24.3913	1658.67	0		364	653.3	9.209	1541.85	0
365	277.1	8.87867	0	4229.11	0	198.384		365	419.4	22.784	1653.6	0		365	479.2	24.026	1526.74	0
366	514.2	8.89383	0	446.559	12956.8	38755		366	695.3	21.9853	1607.23	0		366	350.3	10.804	1526.3	0
367	514.3	8.90883	779.1	412.763	25038	14993.6		367	477.2	9.86633	1570.44	0		367	955.4	15.093	1496.14	0
368	256.6	8.90883	0	0	15530	8780.45		368	587.1	12.2565	1553.84	0		368	301.3	19.383	1476.65	0
369	534.2	8.92867	0	0	4913.87	1586.58		369	359	9.3345	1485.59	0		369	504.2	15.271	1464.44	0
370	295.2	8.943	3647.73	0	1320.95	0		370	394.2	24.8108	1469.95	0		370	421.1	7.384	1453.35	0
371	874.3	8.9465	0	0	0	2540.18		371	377.4	30.1615	1417.22	0		371	513.4	28.457	1447.31	0
372	277.2	8.961	5062.39	0	0	1177.87		372	393.1	36.5435	1410.71	0		372	675.3	12.86	1398.8	0
373	368.1	8.979	3034.67	0	1220.38	0		373	380.3	25.1562	1406.48	0		373	371.9	38.826	1393.55	0
374	256.5	8.99833	0	0	0	5831.9		374	374.4	19.966	1382.72	0		374	152.2	8.004	1372.61	0
375	308.1	9.00583	0	3278.88	0	0		375	939.4	18.5315	1365.33	0		375	373	11.939	1364.15	0
376	668.3	9.02433	2126.36	2777.25	0	0		376	612.1	14.5322	1356.8	0		376	432.2	8.429	1342.02	0
377	237.1	9.032	5382.4	2203.97	1917.36	203.929		377	111	12.3232	1346.2	0		377	536.3	13.658	1300.99	0
378	237	9.06033	369.067	4775.81	0	1114.05		378	474.3	22.8355	1346.06	0		378	223.2	11.4257	1270.27	0
379	405.9	9.067	2280.96	0	0	0		379	285.4	22.9958	1313.14	0		379	231.9	36.858	1240.13	0
380	308.2	9.067	7393.23	2672.25	666.003	0		380	374.3	20.6823	1302.5	0		380	303.3	7.79883	1235.6	0
381	273.2	9.067	6118.46	587.15	0	0		381	525.2	24.2193	1299.3	0		381	394.2	4.105	1215.78	0
382	514	9.06833	0	0	0	4051.07		382	281.3	7.49833	1280.13	0		382	380.1	21.846	1164.26	0
383	307.2	9.08092	51393.8	37064.7	7043.78	11029.8		383	301.1	26.2605	1234.78	0		383	311.2	9.245	1125.25	0
384	659.3	9.085	2323.52	0	0	0		384	544.5	21.5798	1227.44	0		384	354	28.776	1119.26	0
385	310.3	9.085	4904.32	0	12168.4	9402.55		385	373.2	7.23967	1225.31	0		385	395.2	11.4075	1098.94	0
386	988.4	9.103	2626.68	0	0	0		386	513.6	25.938	1173.63	0		386	654.5	9.209	1075.79	0
387	151.8	9.103	3346.42	0	0	605.513		387	331.7	9.55483	1159.88	0		387	962.4	15.288	1058.21	0
388	309.2	9.13217	372738	253086	95651.2	153332		388	460.3	4.63383	1140.45	0		388	329.9	9.67717	1042.41	0
389	310.2	9.13542	102311	97121.5	22787.1	27982.4		389	416.2	8.67983	1135.13	0		389	396.3	21.563	1037.41	0
390	529.2	9.139	0	0	244.824	3171.78		390	152	15.448	1102.99	0		390	508	9.528	1037.15	0
391	307.1	9.15183	0	9016.53	1107.97	977.405		391	377.1	20.8832	1100.35	0		391	937.1	10.981	1033.32	0
392	528.2	9.15233	165.806	233.588	17724.3	5193.12		392	372.1	36.7913	1092.86	0		392	538.2	25.107	1003.07	0
393	311.3	9.174	3717.71	994.283	255.06	0		393	151.9	13.3977	1079.08	0		393	282.3	21.935	994.672	0
394	653.3	9.209	2804.76	1541.85	0	0		394	659.9	7.39483	1061.06	0		394	311.3	9.174	994.283	0
395	654.5	9.209	5379.12	1075.79	0	0		395	379.3	25.1733	1057.54	0		395	413.3	17.5397	988.93	0
396	233.1	9.21792	5213.6	3792.4	0	0		396	393	13.9143	1037.31	0		396	941.4	15.324	988.338	0
397	529.3	9.22133	0	0	8070.78	2386.39		397	482.1	21.8973	1009.62	0		397	431	12.47	976.701	0
398	542.2	9.24267	8291.95	8441.84	0	0		398	413.1	6.9485	938.772	0		398	879.5	24.487	966.248	0
399	311.2	9.245	7798.49	2568.56	822.15	745.722		399	372.2	20.5015	932.94	0		399	279.3	15.607	954.685	0
400	484.2	9.245	5171.82	1125.25	0	0		400	248.9	37.2453	916.344	0		400	635.3	10.432	953.667	0
401	305.2	9.25967	0	3576.19	3328.96	1713.89		401	279.1	16.387	901.303	0		401	331.3	21.0705	947.334	0
402	447	9.262	4978.82	0	0	0		402	471.2	10.2873	896.328	0		402	161.2	36.894	936.452	0
403	468.1	9.28	8969.72	3100.73	900.875	0		403	359.4	12.8192	891.264	0		403	428.2	15.022	930.962	0
404	428.1	9.298	7482.61	1433.35	206.369	167.572		404	379.2	29.1842	877.212	0		404	437	14.739	916.425	0
405	528.3	9.29883	375.189	0	10175.8	0		405	482.3	28.5752	875.26	0		405	357.9	6.12817	911.531	0
406	446.2	9.31567	16329.6	7887.46	1313.52	218.321		406	404.1	7.516	869.982	0		406	394.2	38.073	891.565	0
407	289.1	9.3345	2794.25	4951.85	0	202.731		407	392.9	37.5227	849.58	0		407	393.9	21.811	888.302	0
408	359	9.3345	1485.59	3830.11	0	0		408	310	9.4265	841.35	0		408	484.2	8.341	877.384	0
409	555.2	9.351	4732.99	0	0	752.311		409	887.3	7.34367	831.972	0		409	428.3	9.386	876.708	0
410	273.2	9.35317	2407.5	18786	306.568	0		410	454.3	13.533	775.92	0		410	245.1	43.8862	865.948	0
411	555.4	9.35317	402.57	2827.57	0	0		411	359.1	11.0048	755.78	0		411	259.1	37.0708	855.432	0
412	305	9.35333	849.06	0	2162.76	5697.63		412	284.3	23.2597	748.36	0		412	456.2	13.782	839.807	0
413	367	9.369	6580.76	0	356.17	886.856		413	359.3	5.1995	743.37	0		413	497.2	8.323	823.342	0
414	233.2	9.369	3167.2	0	884.507	0		414	526.3	29.2472	728.057	0		414	379.2	18.9223	811.531	0
415	447.2	9.369	5366.54	343.85	0	0		415	323.4	7.43892	721.968	0		415	394.3	21.0535	809.079	0
416	305.1	9.37067	6331.44	8469.91	4492.49	5166.03		416	370	5.18117	717.024	0		416	152.1	18.124	757.672	0
417	273	9.376	0	0	2967.97	0		417	316	2.97	715.968	0		417	350.2	9.617	757.381	0
418	428.3	9.386	3794.97	876.708	205.895	0		418	451.1	7.82917	706.8	0		418	359.1	6.94	754.863	0
419	732.7	9.39017	0	0	0	2682.82		419	351	0.685333	705.96	0		419	713.3	23.034	751.858	0
420	557.4	9.404	4128.7	2722.48	0	0		420	241.1	5.32583	687.669	0		420	377.2	36.84	722.919	0
421	310	9.4265	0	4576.39	0	0		421	378.4	19.84	684.795	0		421	600.5	19.613	682.547	0
422	289.2	9.4265	841.35	2788.27	0	770.785		422	371.8	16.8292	684.76	0		422	315.9	7.27467	664.832	0
423	273.1	9.45167	25742.4	27269.2	2663.9	4284.52		423	495.1	13.5518	658.956	0		423	781.2	10.786	662.862	0
424	555.3	9.46267	363.58	3972.96	1235.42	0		424	539.2	24.2753	658.26	0		424	346.1	17.008	649.417	0
425	466.1	9.46283	7145.46	8100.97	0	14616.4		425	295.2	15.3767	643.104	0		425	479.4	21.775	634.6	0
426	364.3	9.4705	0	0	2746.69	0		426	578.5	19.5658	637.935	0		426	547.3	9.971	624.142	0
427	512.3	9.4705	0	0	7967.14	5275.51		427	512.3	16.7943	627.086	0		427	259.1	16.5233	612.162	0
428	364	9.475	4035.29	2066.71	0	1011.31		428	849.3	8.145	626.58	0		428	394	15.749	608.522	0
429	534.2	9.493	4501.33	201.619	703.106	1241.4		429	359.4	12.577	612.375	0		429	948.5	13.746	595.797	0
430	444.2	9.51333	72086.6	54869.7	55396	54252		430	261.2	40.2602	611.31	0		430	301	26.0303	594.78	0
431	484.1	9.51375	8399.95	4783.92	580.094	2270.08		431	295.4	20.2178	608.526	0		431	638.2	14.688	593.439	0
432	427.1	9.52383	6276.38	4070.25	809.104	4000.55		432	362.1	7.36067	594.27	0		432	308.2	9.067	587.15	0
433	508	9.528	0	708.109	2726.36	1248.88		433	459.4	25.8742	566.58	0		433	551.2	13.02	575.89	0
434	508.3	9.528	5216.54	1302.8	0	255.205		434	261	41.2767	561.067	0		434	371.9	41.1433	549.97	0
435	556.2	9.528	3582.66	1037.15	0	0		435	393.9	20.5233	536.07	0		435	593.4	16.068	544.781	0
436	467.1	9.53117	9005.7	3981.46	313.325	0		436	961.3	15.0738	523.989	0		436	187	36.894	544.231	0
437	554.2	9.53183	19880.9	14985.7	3142.81	7498.71		437	481.2	28.99	518.34	0		437	394.2	22.154	529.215	0
438	309.1	9.53617	4925.7	8475.76	2717.85	2967.08		438	562.5	21.5798	511.572	0		438	399.1	10.485	503.09	0
439	444.1	9.53617	97450.2	87462.9	21227.6	13525.3		439	259.2	11.1267	500.267	0		439	297.8	10.698	479.537	0
440	427.2	9.546	11286.6	8098.26	7941.52	3489.52		440	390.2	13.0605	462.16	0		440	498.1	8.81217	464.354	0
441	507.2	9.546	34784.8	14150.7	7226.37	2378.9		441	303.6	12.0638	460.08	0		441	263	21.739	463.992	0
442	413.9	9.546	3220.56	0	0	470.898		442	887.2	7.41233	449.44	0		442	151.9	4.85083	457.856	0
443	554.3	9.546	1582.58	0	4512	0		443	498.3	15.5542	446.002	0		443	463.2	8.323	439.72	0
444	426.1	9.54925	18207.6	42898.3	4125.07	3442.87		444	455.4	19.7497	444.064	0		444	138.1	2.864	430.647	0
445	909.2	9.55108	0	13127	5355.74	0		445	874.8	7.37717	431.836	0		445	152.3	8.518	422.217	0
446	331.7	9.55483	0	3811.41	229.218	1208.86		446	372.8	5.90783	415.35	0		446	226.9	36.77	404.989	0
447	446.1	9.55483	13122	8454.54	3254.24	629.217		447	273.2	9.35317	402.57	0		447	549.3	14.721	390.332	0
448	911.2	9.55483	1159.88	6976.59	0	0		448	372.3	28.346	389.02	0		448	104.3	0.523	382.149	0
449	445.1	9.55608	18637.9	27973	15399.3	10907.8		449	394.9	23.3917	375.24	0		449	381.1	10.379	360.808	0
450	910.2	9.55942	9820.53	17293.7	1257.34	2337.58		450	237	9.06033	369.067	0		450	367	9.369	343.85	0
451	482	9.564	11462.2	2410.57	0	1112.39		451	639.4	15.448	367.488	0		451	317	17.0602	315.596	0
452	483.1	9.564	3723.78	1595.81	1016.26	661.568		452	378.1	28.1713	346.491	0		452	552.3	11.549	314.594	0
453	551.1	9.564	3474.86	0	876.939	2206.2		453	718.8	15.2703	323.769	0		453	549.2	15.076	309.411	0
454	555.1	9.564	7034.89	1969.8	1653.98	0		454	297.3	17.9635	318	0		454	382.1	10.432	304.539	0
455	911.3	9.564	7434.77	901.612	1076.43	208.583		455	512.5	17.29	298.2	0		455	414.1	10.556	289.342	0
456	383.1	9.564	2865.18	0	3322.7	0		456	281.4	7.55133	294.411	0		456	456.1	7.384	270.107	0
457	373.8	9.56725	2190.47	4282.4	741.657	516.164		457	496.2	21.7402	280.8	0		457	247.2	9.88317	268.619	0
458	467.2	9.57233	395.064	5712.79	1421.4	1408.55		458	379.3	29.0498	277.2	0		458	232.1	37	259.595	0
459	508.1	9.57233	434.709	5373.2	759.822	266.826		459	540.4	28.971	230.64	0		459	396.4	24.327	248.746	0
460	909.3	9.57667	63946.9	25619.8	1736.68	2552.35		460	171.2	2.175	224.72	0		460	262.1	36.947	218.318	0
461	466.2	9.57692	18447.7	33747.7	11722.3	3044.15		461	171	37.259	207.192	0		461	281	22.626	218.198	0
462	329.5	9.578	0	2887.87	2687.52	1782.6		462	317.1	7.29133	197.025	0		462	411.2	20.9828	204.041	0
463	393.2	9.581	4887.66	0	1171.32	0		463	620.3	13.3977	178.356	0		463	526.5	28.326	203.12	0
464	383.2	9.58817	2974.54	3348.61	10279.3	6589.71		464	917.3	7.56783	178.356	0		464	378.5	24.363	194.087	0
465	383	9.59133	0	0	0	3012.83		465	586.3	12.186	177.855	0		465	553.3	25.178	191.298	0
466	534	9.595	2564.14	3836.54	0	1724.05		466	620.2	13.3125	175.296	0		466	320.2	12.399	173.247	0
467	426.2	9.60217	23328.2	15613.1	16206.3	13506.7		467	265.3	23.3647	165.54	0		467	675.4	12.949	172.094	0
468	507.1	9.60217	5623.2	3193.75	5461.75	908.918		468	348	7.34317	162.736	0		468	471.2	15.04	169.862	0
469	350.2	9.617	2314.36	757.381	0	0		469	471.2	7.36067	159.75	0		469	380.4	28.475	169.48	0
470	482.1	9.62117	937.149	5377.77	4078.43	3211.87		470	497.2	15.2792	97485.8	178.411		470	293.3	6.285	168.61	0
471	445.2	9.62833	30302.7	20951	6981.07	2434.38		471	939.4	15.0119	92331.3	172.355		471	346.2	21.704	160.787	0
472	484.2	9.634	3662.61	1719.16	226.789	399.145		472	546.4	28.659	47260.9	166.724		472	497.2	15.2792	74879.7	255.794
473	468.2	9.652	10855.3	6616.68	1132.85	1695.16		473	409.1	15.022	56080.7	222.521		473	939.4	15.0119	61530.9	446.407
474	426	9.67	16008.8	0	0	0		474	781.4	10.467	72698.8	338.48		474	885.2	7.401	205373	2546.52
475	396.2	9.67	22038	8086.85	0	1270.61		475	526.4	28.5697	141892	1091.42		475	781.3	10.4949	104447	1359.76
476	329.9	9.67717	402.57	1042.41	2415.82	0		476	782.3	10.4767	65655.8	680.332		476	782.3	10.4767	37453.9	489.718
477	512.1	9.67717	0	0	4484.71	1005.92		477	781.3	10.4949	121007	1828.93		477	998.4	13.1623	27168.1	394.291
478	152.3	9.68283	0	0	952.284	3500.12		478	378.2	31.24	21843.2	380.154		478	887.2	7.41233	49911.9	832.458
479	856	9.68317	0	2722.08	0	0		479	939.4	15.2792	52360.2	1093.85		479	284	5.29017	11438.1	199.454
480	861.3	9.688	7613.73	2769.62	0	0		480	281.3	16.7053	7940.05	168.598		480	997.3	13.1883	88442	1653.4
481	323.3	9.71533	507.636	0	4088.62	1351.55		481	452.2	15.661	20697	461.543		481	419.2	22.1603	22707.9	456.642
482	507	9.71933	0	7516.53	731.409	352.662		482	652.3	13.1267	9478.48	217.736		482	418.2	10.4505	22642.6	530.763
483	445.3	9.7205	0	1007.85	0	2609.12		483	534	13.6398	35107.7	855.297		483	551.1	12.9778	7651.6	183.722
484	690	9.723	2540.82	0	0	0		484	598.3	13.3683	44556.1	1139.73		484	454.1	13.5782	13682.8	329.126
485	910.1	9.723	3546.76	0	0	0		485	369.3	8.46417	36200.6	964.827		485	441.2	14.9674	7324.6	180.366
486	481.2	9.73833	0	0	0	3946.16		486	909.3	9.57667	63946.9	1736.68		486	306.2	5.3075	11322.4	286.496
487	517.2	9.77133	428.268	0	3087.23	0		487	396.3	21.563	6701.31	182.609		487	886.3	7.36067	9079.93	235.016
488	305.3	9.776	4117.29	0	0	0		488	428.1	9.298	7482.61	206.369		488	542.2	8.61583	17862.2	484.265
489	515.2	9.776	161.424	0	4971.63	10517		489	542.1	10.964	6544.01	181.027		489	446.2	9.31567	7887.46	218.321
490	479.2	9.78275	0	0	133743	113049		490	337.2	5.044	8797.79	248.229		490	416.2	8.67983	6533.38	181.523
491	480.2	9.78275	0	0	38618.9	35389.1		491	457.2	8.11025	8325.33	235.841		491	654.4	15.0738	6735.06	200.209
492	516.3	9.795	0	612.188	1031.36	9008.78		492	581.4	22.785	6443.25	183.886		492	461.2	15.217	5948.82	179.005
493	525.2	9.81283	4259.67	2769.51	2072.53	7165.6		493	528.3	14.987	6962.56	209.598		493	535.3	13.6568	6878.54	211.93
494	383.3	9.82717	1323.59	0	3381.4	0		494	366.3	28.351	11149.4	351.647		494	441.1	17.9992	6623.74	235.165
495	396.9	9.829	2733.67	0	0	0		495	481.3	28.51	21089.8	698.899		495	470.2	7.366	48445.4	1736.18
496	495.2	9.82958	0	0	260961	122449		496	428.2	15.022	14039.5	473.753		496	348.1	8.07433	16381.5	592.321
497	493.2	9.84617	0	0	1.7318e+06	4.95711e+06		497	420.2	22.1472	4705.53	162.948		497	380.3	25.1562	4661.33	175.835
498	547.2	9.84908	9963.22	18681.7	6442.73	18761.6		498	467.1	9.53117	9005.7	313.325		498	961.4	15.2703	4347.09	168.266
499	495.3	9.85067	0	0	0	144916		499	536.3	13.658	4980.94	176.394		499	384.4	12.4544	8257.92	332.596
500	494.2	9.85742	413.4	0	634535	1.30301e+06		500	394.1	8.146	12294.9	450.679		500	419.2	10.4769	5007.93	201.679
501	477.2	9.86633	1570.44	5035.44	0	0		501	542.1	10.414	9221.73	355.908		501	359	9.3345	4951.85	202.731
502	496.3	9.86867	0	831.185	6109.27	19161.6		502	547.5	23.2229	12699.8	491.966		502	583.5	22.7662	8818.2	370.29
503	507.3	9.883	3952.77	0	0	0		503	260.9	15.9095	5355.41	210.613		503	653.2	13.1105	3709.39	159.67
504	247.2	9.88317	0	0	37911.1	27779.2		504	419.3	26.8232	11065.4	442.089		504	598.3	13.3683	26788.3	1219.45
505	526.1	9.88317	0	268.619	3206.64	0		505	511.3	16.0682	13002.3	522.629		505	566.2	15.1455	3803.28	173.863
506	595.4	9.88317	0	0	3506.37	1905.93		506	592.3	15.9622	25130	1046.22		506	472.1	7.82917	3521.95	162.225
507	476.2	9.885	13051.9	13112.3	5622.24	952.334		507	568.2	13.1357	12713.9	529.545		507	507	9.71933	7516.53	352.662
508	392.9	9.90667	0	0	1099.94	3442.56		508	414.1	10.556	4000.14	167.211		508	277.1	8.87867	4229.11	198.384
509	476.3	9.91083	7215.41	0	0	4414.42		509	367.3	8.713	9087.43	395.666		509	439.2	15.9145	3696.82	173.606
510	498.2	9.918	6229.01	3348.87	1100.01	1497.46		510	427.2	15.0202	57774.6	2561.93		510	460.2	4.524	3668.98	174.394
511	377.9	9.936	3753.46	0	0	0		511	457.4	16.387	6118.88	273.931		511	467.2	9.57233	5373.2	266.826
512	382.3	9.936	2992.7	0	0	0		512	885.2	7.401	35573.8	1600.65		512	874.2	7.36067	12667.1	638.496
513	326.1	9.9435	973.227	496.77	2843.22	5780.82		513	460.2	15.1092	27493.9	1244.43		513	612.1	14.5322	3602.02	187.646
514	514.2	9.953	4054.45	0	0	0		514	283.3	23.211	80048.2	3635.48		514	477.3	12.718	3938.27	209.472
515	526.2	9.95833	352.515	2750.1	1122.97	1005.63		515	295.3	20.216	3919.45	180.996		515	887.3	7.34367	48111.3	2580.86
516	547.3	9.971	17499.9	6038.32	8456.66	10519.8		516	428.1	14.934	4857.98	226.241		516	496.2	21.7402	3419.56	192.25
517	434.1	9.971	14848.3	624.142	0	0		517	452.1	15.8558	7141.89	339.359		517	389.2	13.144	21371.4	1203.14
518	649.5	9.98167	0	0	0	2568.38		518	499.2	15.2522	5280.56	251.657		518	941.3	15.076	5700.1	323.984
519	434.2	9.9945	2663.35	14518.1	2447.17	992.812		519	543.2	8.713	176721	8452.54		519	370.9	21.598	18416.4	1065.56
520	373.2	9.99808	0	1323.94	3515.22	2655.3		520	497.1	28.475	3351.19	160.868		520	406.2	10.6837	18994.5	1100.62
521	494.3	9.99825	0	0	851510	466059		521	599.2	13.3257	14341.8	706.524		521	652.3	13.1267	19820.9	1166.22
522	496.2	10.0258	0	0	16971.4	5719.76		522	547.4	28.6678	14364.1	711.863		522	943.2	7.36067	10807.6	638.53
523	516.2	10.0327	0	0	4473.57	1089.87		523	503.1	15.2	8917.39	459.098		523	885.3	7.36125	403537	23898.8
524	525.3	10.0378	18448.8	12529.5	23356.5	24597.1		524	465.4	24.851	3749.32	194.79		524	711.6	22.802	6335.89	375.52
525	325.3	10.06	8565.86	0	0	0		525	463.2	8.323	3615.67	189.454		525	325.3	21.5285	12354.6	740.424
526	325.2	10.0785	14287.8	21557.1	26793.1	26882.8		526	437.2	18.461	5449.01	287.139		526	373.2	7.23967	8528.4	523.051
527	511.1	10.1133	0	0	0	5369.76		527	357.4	21.3838	5066.67	267.982		527	437.2	13.64	32221.4	1989.19
528	649.4	10.1262	0	0	4325.86	0		528	811	10.379	3773.6	200.179		528	421.2	10.724	6646.98	420.428
529	359.3	10.1505	7052.97	18347.4	2008.15	21601.4		529	769.4	8.45542	3869.51	206.342		529	349.2	17.468	3584.21	229.06
530	494.2	10.1628	0	0	205396	104271		530	233.2	9.369	6580.76	356.17		530	365	0.489	9224.47	591.059
531	548	10.1697	0	0	0	2853.52		531	428.3	9.386	3794.97	205.895		531	416.2	13.6392	6732.93	434.591
532	476.1	10.1772	0	2494.85	0	0		532	770.6	15.04	6135.69	333.615		532	556.3	11.1813	2712.54	178.425
533	548.3	10.1772	3977.6	11693.6	2303.29	2986.3		533	521.4	22.856	2884.72	158.563		533	428.3	12.577	4708.91	310.675
534	495.3	10.1817	231.08	0	29316.4	17273.4		534	379.2	24.806	7692.97	430.313		534	434.2	9.9945	14518.1	992.812
535	834.4	10.2185	0	0	3151.38	1255.5		535	584.3	12.063	802805	45154.5		535	404.1	8.51767	7952.81	547.552
536	833.5	10.2315	0	0	3974.4	3586.37		536	482.2	15.005	7997.92	452.94		536	433.3	22.838	4807.1	333.312
537	833.4	10.2373	0	0	5088.57	3615.6		537	379.2	21.793	2723.14	155.566		537	497.3	15.5365	36646	2558.55
538	548.1	10.2562	0	0	5872.29	0		538	101	0.578	3864.73	225.566		538	617.2	15.217	7489.08	523.345
539	509.2	10.2689	0	0	1.32085e+06	1.0175e+06		539	409.1	25.249	4510.77	263.998		539	395.1	6.42933	5064.68	356.596
540	510.2	10.2689	0	0	385876	347018		540	346.1	17.008	4241.78	254.596		540	317.2	20.2362	17387	1225.48
541	471.2	10.2873	896.328	3343.91	0	0		541	259.2	13.126	5093.9	309.815		541	337.1	15.2526	1050738	74102.6
542	511.2	10.2878	0	0	63213.4	54020.5		542	432.9	8.163	2745.62	168.036		542	333.1	14.7312	2597.62	183.452
543	255.2	10.2928	0	353.646	10168.4	1024.02		543	961.4	15.2703	2625.26	160.87		543	555.4	20.6453	2890.62	206.202
544	854.8	10.3305	0	0	2320.83	0		544	484.2	9.634	3662.61	226.789		544	593.3	15.9095	5014.5	358.83
545	493.3	10.3405	1111.86	182.317	83672.3	63980.9		545	321.2	5.026	7896.98	495.438		545	469.2	24.5081	5662.6	405.82
546	255.1	10.367	0	0	10661.5	11041.9		546	583.4	22.768	5497.92	346.444		546	348	8.146	3082.15	222.834
547	543.2	10.3777	1467.03	5314.06	257.206	0		547	465.3	17.202	5909.49	373.662		547	476.2	9.885	13112.3	952.334
548	565.2	10.378	621.576	0	797.391	4153.25		548	378.3	30.957	126905	8052.2		548	421.3	23.8195	17421.3	1268.31
549	381.1	10.379	16994.2	0	0	0		549	566.2	15.1455	3039.87	192.792		549	377.3	31.222	82121.3	5986.48
550	811	10.379	3773.6	360.808	200.179	0		550	152.2	39.4482	6550.75	415.753		550	482.2	15.1853	271014	19880.5
551	520.2	10.3959	10555.8	3252.08	1891.11	1139.93		551	675.4	22.041	3592.96	230.696		551	446.1	9.55483	8454.54	629.217
552	470.2	10.414	4703.6	2108.88	0	174.547		552	652.4	16.033	4174.77	268.378		552	546.3	24.558	2138.26	164.776
553	542.1	10.414	9221.73	0	355.908	0		553	361.2	26.064	10818.8	699.372		553	295.3	20.216	2197.06	169.857
554	425.3	10.4145	1733.82	6524.93	0	647.976		554	265.2	23.2437	6131.39	411.106		554	449.2	22.821	9959.83	789.194
555	395.2	10.4155	5778.94	7238.31	5809.03	8895.19		555	469.2	13.303	4633.39	310.724		555	425.3	18.1505	2505.53	198.603
556	542.2	10.4155	8027.97	8660.4	2380.59	6465.14		556	311.3	9.174	3717.71	255.06		556	291	5.839	3673.8	291.995
557	635.3	10.432	3650.4	0	0	0		557	444.3	8.553	2617.67	180.537		557	303.1	17.184	5035.55	400.298
558	382.1	10.432	4115.23	953.667	1124.53	0		558	484.1	9.51375	8399.95	580.094		558	439.3	16.37	5938.18	475.291
559	289.6	10.432	3299.78	304.539	0	0		559	359.3	8.181	3407.96	235.911		559	376.2	8.09217	2377.58	190.438
560	567.4	10.4347	0	0	0	6958.35		560	452.2	7.39808	2812.18	195.029		560	568.2	13.1357	13576.5	1089.16
561	403.2	10.4372	3229.82	11032.5	3059.16	2353.87		561	542.1	8.752	2658.48	186.607		561	426.1	9.54925	42898.3	3442.87
562	912.5	10.4412	0	0	2494.18	0		562	394	15.749	3821.87	271.93		562	327.3	23.2765	5457.94	440.825
563	419.9	10.45	3012.52	0	0	0		563	509.2	15.855	18627	1338.79		563	452.2	15.661	7107.63	579.103
564	402.2	10.45	120711	27907.4	0	6270.38		564	418.1	10.5378	39532	2873.6		564	420.2	26.6883	4550.09	371.408
565	297.7	10.45	9304.69	3411.01	0	0		565	565.4	23.175	6668.46	493.671		565	111	37.9537	3683.53	302.96
566	380.2	10.4503	223092	217537	45823.6	22481.6		566	378.4	30.602	11308.2	847.671		566	470.2	10.414	2108.88	174.547
567	418.2	10.4505	6142.88	22642.6	2084.34	530.763		567	359.1	22.803	3013.58	230.017		567	279.4	7.8815	16350.5	1396.68
568	381.2	10.4588	53655.1	55994	7032.56	6316.54		568	320.2	12.399	2908.82	227.325		568	124.1	0.647167	8920.87	769.309
569	783.3	10.4588	20118.8	9926.92	0	0		569	495.3	13.6832	9982.74	800.022		569	459.2	15.1827	120769	10423.6
570	810.4	10.4598	0	0	2395.01	0		570	446.2	9.31567	16329.6	1313.52		570	281.3	16.7053	10761.4	931.481
571	111	10.4598	308.85	0	2647.39	3123.7		571	413.1	21.846	6007.66	485.292		571	471.2	22.9432	6473.29	565.507
572	566.3	10.4658	0	0	9595.99	3790.56		572	467.4	21.509	2332.51	189.981		572	375.1	0.647167	5561.6	495.529
573	770.4	10.467	3700.06	0	0	0		573	379.4	30.832	6888.42	565.518		573	437.3	18.371	3421.72	305.17
574	781.4	10.467	72698.8	0	338.48	0		574	313.2	25.196	5090.12	430.977		574	337.1	19.95	1964.22	175.372
575	520.3	10.4688	0	5972.52	1672.1	1941.96		575	366.4	28.5065	3111.66	270.734		575	499.3	12.7448	7373.47	661.491
576	782.3	10.4767	65655.8	37453.9	680.332	489.718		576	547.6	23.14	6586.04	577.339		576	495.1	13.5518	5211.19	469.482
577	419.2	10.4769	6334.56	5007.93	0	201.679		577	297.2	15.377	3270.61	288.339		577	466.2	9.57692	33747.7	3044.15
578	399.1	10.485	5462.02	503.09	0	0		578	535.2	13.693	7127.17	631.455		578	452.2	11.419	2646.5	239.373
579	402.1	10.4918	59325.1	64798.9	12380.7	7131.68		579	203.1	0.559917	5940.61	529.705		579	427.2	15.0202	62130.6	5697.54
580	403.1	10.494	14079.7	0	0	311.01		580	325.2	6.621	33211.1	2962.47		580	419	8.18083	2859.09	264.152
581	781.3	10.4949	121007	104447	1828.93	1359.76		581	283.1	23.991	3257.76	292.929		581	237.1	9.032	2203.97	203.929
582	567.3	10.495	0	0	5321.17	9857.88		582	273.2	9.067	7393.23	666.003		582	283.3	21.5538	4347.09	406.821
583	382.2	10.5132	5553.43	9631.23	759.45	2326.42		583	316.1	7.39583	18601.3	1693.41		583	368.3	8.38742	100392	9421.28
584	565.3	10.5152	0	0	7920.41	6096.46		584	319.3	17.982	6181.26	567.494		584	456.2	7.34317	21390.5	2018.32
585	418.1	10.5378	39532	6308.68	2873.6	907.146		585	111.2	16.423	4091.73	377.296		585	316	7.897	13510.1	1280.2
586	531.3	10.5493	1157.71	217.341	4848.09	7209.66		586	640.3	15.359	2708.3	252.037		586	940.4	15.022	2270.28	216.328
587	412.2	10.556	8824.6	3640.9	1902.6	0		587	586.2	12.0803	79901.2	7445		587	378.3	30.957	31426.6	3028.96
588	414.1	10.556	4000.14	289.342	167.211	0		588	497.2	14.9943	51433.8	4814.29		588	373.1	18.0695	4056.62	393.128
589	297.6	10.556	4705.34	0	0	635.513		589	579.3	17.202	3474.48	325.924		589	574.2	7.46417	61960.5	6124.07
590	412.3	10.5603	0	2551.45	0	0		590	510.3	15.926	20487.8	1929.37		590	413.3	7.48183	3291.95	325.627
591	783.4	10.5778	2051.2	4112.06	0	0		591	316	7.897	14933.5	1428.39		591	111	14.6955	5395.06	535.486
592	542.3	10.6069	10923	12538	10603.1	7639.82		592	359.4	4.62642	3247.03	311.01		592	425.3	10.4145	6524.93	647.976
593	381	10.6077	0	0	4525.14	1800.52		593	569.3	13.161	6249.94	598.758		593	909.3	9.57667	25619.8	2552.35
594	297.4	10.6148	0	5301.5	977.531	0		594	495.4	13.0762	4966.09	477.439		594	566.5	23.2353	2412.61	245.955
595	436.1	10.627	4956.04	4175.31	0	542.485		595	456.2	13.782	7936.35	763.667		595	380.2	10.4503	217537	22481.6
596	831.3	10.68	2383.94	0	0	198.729		596	441.2	15.306	16867.8	1626.35		596	939.4	15.2792	41701.2	4365.87
597	406.2	10.6837	6302.27	18994.5	1346.71	1100.62		597	319.2	17.805	2818.13	272.559		597	431.2	12.4935	9696.64	1025.77
598	405.1	10.6939	0	66231.6	3934.22	18049.3		598	548.5	23.2527	7631.45	738.481		598	503.3	15.005	96682.9	10244.2
599	297.8	10.698	4166.23	479.537	0	0		599	337.1	15.2526	10982.6	1062.85		599	313.1	6.37575	5175.47	548.465
600	406.1	10.7007	3081.35	2648.07	0	4058.84		600	441.3	18.5937	19986.6	1950.74		600	378.2	31.24	4876.31	517.731
601	976.5	10.7055	0	3030.54	0	0		601	393.2	15.7588	11647.3	1149.73		601	548.5	23.2527	5122.65	545.045
602	277.1	10.7055	734.784	2843.98	835.867	429.179		602	497.2	11.5367	7569.94	747.676		602	372	2.53533	4539.29	486.555
603	781.4	10.7055	7007.42	9759.66	0	0		603	436	11.371	6112.91	605.506		603	307.1	9.15183	9016.53	977.405
604	421.2	10.724	3462.26	6646.98	1582.72	420.428		604	979.7	10.804	9655.8	961.779		604	499.2	15.2522	9352.55	1017.63
605	405.2	10.7261	74883.3	18731.9	8765.87	6873.74		605	321.2	16.5467	6698.03	671.357		605	275	7.55133	2580.5	281.532
606	110.9	10.733	2797.34	0	0	0		606	390.2	11.212	4190.65	420.296		606	402.1	10.4918	64798.9	7131.68
607	421	10.733	3345.36	0	0	1576.18		607	468.1	9.28	8969.72	900.875		607	527.2	15.1988	4654.75	515.417
608	509.3	10.7392	955.733	221.33	9462.18	18351.4		608	503.3	15.005	2655.3	266.668		608	783.3	10.4588	55994	6316.54
609	418.2	10.7538	4992.71	4214.86	3750.38	770.847		609	394.2	8.64417	14993	1541.64		609	241	5.7165	5799.99	659.869
610	602.2	10.7575	1261.11	450.138	2667.97	4592.99		610	273.1	9.45167	25742.4	2663.9		610	323.5	7.43	4525.12	516.535
611	261	10.7602	3134.29	4343.82	427.789	3665.27		611	481.3	21.952	95138.6	9909.93		611	481.2	15.2526	9612.48	1104.21
612	781.2	10.786	3387.7	662.862	0	0		612	368.2	10.8018	6085.6	634.114		612	497.2	14.9943	37686.8	4374.12
613	367.3	10.7927	29858.5	16544.9	6776.43	5188.13		613	468.2	9.652	10855.3	1132.85		613	367.3	8.713	1372.33	159.213
614	368.2	10.8018	6085.6	10543.5	634.114	3053.38		614	513.1	11.442	3029.92	318.096		614	445.2	9.62833	20951	2434.38
615	350.3	10.804	9655.8	1526.3	961.779	0		615	484.2	9.245	7798.49	822.15		615	459.3	25.805	5444.28	634.591
616	979.7	10.804	2214.34	0	0	470.453		616	395.2	39.304	2684.78	286.712		616	638.4	15.307	29152	3398.44
617	494.1	10.8087	0	0	5117.86	0		617	377.3	30.9383	435576	46841		617	428.1	9.298	1433.35	167.572
618	367.2	10.8153	6719.54	12553	5937.22	12039		618	259.2	36.7498	1602.45	172.529		618	357.4	21.3838	4343.58	508.946
619	507.3	10.8153	0	0	2226.08	6022.31		619	441.5	18.904	3910.25	424.845		619	397.3	23.8372	4010.79	470.454
620	368.3	10.822	4888.72	2000.16	763.371	511.567		620	357.2	21.651	7120.08	780.322		620	567.3	12.1507	4888.38	576.986
621	371.9	10.8528	0	0	0	2976.86		621	456.1	7.384	5072.76	557.404		621	638.3	17.468	6948.41	821.279
622	259.1	10.857	8726.32	6054.55	2485.68	818.792		622	551.3	14.952	4129.37	455.076		622	377.3	30.9383	182003	21720.3
623	352.1	10.875	3557.1	2149.01	0	0		623	297.1	18.0795	3632.85	400.89		623	373.8	9.56725	4282.4	516.164
624	535.3	10.9095	165.075	368.434	1667.32	5337.78		624	424.3	13.126	8008.3	892.428		624	769.4	8.45542	7510.38	906.126
625	352	10.944	0	2281.25	0	0		625	622.1	12.098	14680.4	1636.71		625	460.3	15.182	38208.8	4617.51
626	918.8	10.955	0	0	2549.3	0		626	282.3	21.935	11980.5	1340.61		626	521.2	26.4023	11103.7	1350.86
627	428.3	10.9562	12571	5148.58	3688.1	4799.59		627	613.3	13.5002	1705.07	191.927		627	591.2	16.033	1549.57	188.908
628	542.1	10.964	6544.01	0	181.027	0		628	470.1	7.41667	7511.4	862.25		628	394	8.86033	5220.63	643.714
629	521.2	10.98	2477.22	3492.55	0	0		629	377.3	31.222	92388.9	10639.5		629	312.2	15.0202	9819.3	1253.4
630	937.1	10.981	2511.29	0	0	0		630	524.3	24.1323	30157.7	3487.84		630	382.2	11.382	6290.52	810.247
631	450.2	10.981	5730.3	1033.32	1767.21	0		631	418.1	8.19767	13013.6	1508.65		631	436.1	10.627	4175.31	542.485
632	410.2	10.992	0	583.391	4530.08	1367.73		632	405.2	10.7261	74883.3	8765.87		632	371.8	16.8292	3384.41	440.85
633	359.1	11.0048	755.78	0	0	6407.97		633	566.5	23.2353	4004.8	470.111		633	453.3	20.5598	9711.65	1268.9
634	542.2	11.0173	4401.33	8760.49	679.41	1418.53		634	370.1	5.044	3709.96	442.146		634	140	0.595	4841.67	641.357
635	428.2	11.0217	0	3786.78	1232.7	5177.78		635	470.8	15.005	136225	16421.9		635	721.9	15.076	1383.54	183.321
636	370.9	11.024	0	1955.4	4373.9	6490.24		636	413.1	26.224	3438.76	415.91		636	370.1	5.044	2921.62	388.863
637	449.9	11.028	0	0	2518.34	184.331		637	494.1	13.782	6502.56	791.963		637	394.2	8.64417	16317.9	2193.39
638	607.2	11.028	0	0	10010.9	3123.36		638	378.3	28.918	16211.5	2016.31		638	340.3	12.3867	19332.3	2607.45
639	582.4	11.035	2927.68	0	0	0		639	427.1	15.465	2075.48	262.246		639	910.2	9.55942	17293.7	2337.58
640	405.1	11.035	9380.65	2874.36	4023.47	0		640	582.4	22.75	6030.02	763.129		640	259.1	10.857	6054.55	818.792
641	607.3	11.0523	0	0	4578.95	9109.75		641	555.4	9.35317	2407.5	306.568		641	524.5	23.3647	2592.76	350.98
642	521.3	11.072	0	2459.2	0	0		642	910.2	9.55942	9820.53	1257.34		642	495.3	21.9703	4520.33	613.302
643	375.3	11.106	5395.54	0	0	661.398		643	366.3	21.474	9256.5	1192.89		643	411	22.1125	2969.35	403.818
644	259.2	11.1267	500.267	4273.49	0	0		644	427.1	9.52383	6276.38	809.104		644	334.2	7.29133	7648.52	1044.42
645	428.1	11.1367	0	1133.08	5109.18	749.633		645	521.3	26.543	14382.5	1872.16		645	620.2	13.3125	4102.2	560.178
646	405.3	11.1813	0	3321.73	0	0		646	783.3	10.4588	53655.1	7032.56		646	379.4	25.324	3152.81	430.556
647	556.3	11.1813	0	2712.54	0	178.425		647	301.3	19.383	4613.58	606.924		647	548.3	12.133	2978.79	408.44
648	652.3	11.1877	8512.54	11579.7	0	0		648	281.3	21.811	47905.8	6337.18		648	336.3	24.4903	3410.26	474.125
649	111.3	11.1918	0	0	2959.43	0		649	415.2	13.622	12889.5	1712.12		649	281.7	7.37717	5158.02	722.569
650	390.2	11.212	4190.65	2234.41	420.296	0		650	493.2	24.5234	3639.76	484.957		650	286.4	22.8198	3904.29	550.056
651	372.2	11.2185	0	3697.42	803.083	0		651	411.3	15.749	5642.37	756.429		651	418.1	10.5378	6308.68	907.146
652	556.1	11.3042	4104.93	3280.62	1528.32	0		652	261	10.7602	3134.29	427.789		652	523.4	24.5622	10595.8	1540.22
653	437	11.309	0	2957.4	0	642.668		653	382.2	10.5132	5553.43	759.45		653	414.3	25.616	6680.7	976.897
654	556.2	11.3252	1934.75	1941.48	969.58	4083.3		654	509.3	11.868	7876.79	1078.52		654	390.1	13.037	1533.81	225.685
655	904.6	11.3462	0	2467.42	0	0		655	307.2	9.08092	51393.8	7043.78		655	455	8.27	1073.58	158.419
656	494.1	11.3537	0	0	6436.06	2249.53		656	460.3	15.182	33881.9	4661.98		656	592.3	15.9622	12136.8	1793.68
657	436.1	11.3635	3704.65	21431.7	9237.33	8253.16		657	359.3	14.544	6058.96	834.405		657	537.2	6.67067	12131.8	1796.84
658	426.1	11.368	4396.01	3661.78	775.654	0		658	940.4	15.022	16006.7	2216.72		658	261.2	38.4222	4875.42	724.268
659	436	11.371	6112.91	0	605.506	931.398		659	482.2	15.1853	116785	16452.5		659	297.1	18.0795	3340.68	496.508
660	382.2	11.382	836.267	6290.52	1276.52	810.247		660	497.3	28.6293	2244.25	321.733		660	436.3	22.2185	4396.68	659.755
661	395.2	11.4075	271.36	1098.94	3299.88	0		661	627.4	21.563	21249.7	3054.65		661	321.2	16.5467	6040.39	906.72
662	437.2	11.419	385.067	2861.17	1386.28	0		662	375.3	24.239	3989.7	573.627		662	781.4	10.7055	2843.98	429.179
663	452.2	11.419	162.945	2646.5	1203.13	239.373		663	469.2	24.5081	8725.01	1259.41		663	309.1	9.53617	87462.9	13525.3
664	223.2	11.4257	1645.45	1270.27	4630.01	0		664	483.1	9.564	7434.77	1076.43		664	279.3	20.1457	12497.5	1948.29
665	309.2	11.4307	4544.96	2411.9	0	0		665	555.2	14.597	14556.5	2117.11		665	513.3	15.4298	5242.76	818.477
666	574.2	11.4363	0	2737.92	0	0		666	437.2	13.64	15796.1	2308.42		666	273.1	9.45167	27269.2	4284.52
667	513.1	11.442	9073.8	1542.67	1552.72	2255.02		667	483.3	21.935	3273.87	479.171		667	426	9.67	8086.85	1270.61
668	552.2	11.442	3029.92	1737.92	318.096	0		668	378.4	27.784	14021.2	2055.94		668	275.1	7.084	2908.64	457.206
669	426.2	11.4438	1574.26	1213.45	5538.67	3359.39		669	770.4	8.482	4708.46	699.699		669	280	0.595	3052.53	480.227
670	552.4	11.4907	0	2627.28	261.868	0		670	410.2	13.941	9816.55	1463.14		670	318.2	17.131	3357.95	537.432
671	498.2	11.495	7725.21	2314.41	1895.19	0		671	284.2	23.211	26088.1	3899.63		671	886.2	7.37933	87227.6	13985.8
672	574.3	11.495	4013.1	2358.7	794.458	470.19		672	628.5	21.563	3593.06	537.466		672	569.5	21.3933	37603.7	6072.41
673	497.3	11.5092	20816.8	9445.66	10981.4	7804.64		673	524.5	23.3647	1258.47	188.685		673	542.2	11.0173	8760.49	1418.53
674	498.3	11.5275	0	5781.14	732.141	1305.01		674	354.3	21.4385	4459.42	673.656		674	281.2	16.6175	4069.33	668.714
675	497.2	11.5367	7569.94	6646.16	747.676	3192.58		675	320.2	21.5088	1368.46	206.871		675	394.1	8.146	12300.7	2027.09
676	371.9	11.5458	0	6230.47	0	0		676	469.5	20.7192	16541.6	2511.63		676	569.4	21.5265	5767.72	954.563
677	552.3	11.549	6584.89	314.594	1827.89	0		677	327.3	23.2765	1644.24	249.639		677	559.4	23.0307	3229.26	535.744
678	513.2	11.6117	5447.47	3776.12	5822.81	3858.68		678	495.2	21.58	6130.56	935.811		678	526.3	29.2472	2751.61	456.833
679	394.1	11.6405	1213.34	0	3067.64	1025.39		679	695.4	21.935	15469.5	2380.84		679	735.4	6.15217	11414.5	1902.55
680	852.9	11.655	2274.76	0	0	0		680	542.2	11.0173	4401.33	679.41		680	427.2	9.546	14150.7	2378.9
681	152.2	11.6792	8289.98	7591.38	5706.74	10874.6		681	451.3	24.4717	2709.16	418.826		681	481.4	22.1655	32474.6	5468
682	392.9	11.7077	0	6536.16	0	0		682	549.3	14.721	3717.11	576.288		682	607.2	12.0893	17545.1	2993
683	395	11.726	3256.09	0	1315.02	396.188		683	479.2	24.026	3228.76	501.83		683	354.2	21.0975	13698.1	2343.01
684	441.7	11.7442	0	2572.11	0	780.795		684	371	26.809	8317.92	1295.64		684	439.2	19.8583	34630	5968.51
685	335.3	11.753	0	1217.29	1744.71	5419.15		685	368.3	10.822	4888.72	763.371		685	395.1	21.3003	4723.26	816.463
686	436	11.779	4507.58	0	1581.55	0		686	534.2	9.493	4501.33	703.106		686	460.2	15.1092	8490.6	1471.29
687	261.2	11.7795	1815.26	2283.07	0	0		687	378.3	29.4572	2497.38	392.937		687	521.4	23.2883	3720.88	651.611
688	335.2	11.7827	2141.2	1950.48	3450.03	0		688	492.3	24.416	2256.67	356.367		688	458.1	8.163	1972.74	348.582
689	509.2	11.833	2495.24	5699.62	1472.94	3960.57		689	554.2	9.53183	19880.9	3142.81		689	735.3	6.21758	2954.31	523.782
690	547.1	11.833	0	5507.73	0	1926.42		690	113	0.648	7053.49	1121.49		690	324.1	7.46417	5448.4	977.814
691	547.3	11.8379	7195.5	5387.17	16578	17425.7		691	415.3	13.9515	4370.77	695.363		691	279.1	17.237	2680.74	482.083
692	531.3	11.8651	23308.3	28834.9	27499.3	19173.1		692	152.2	8.004	4657.25	742.478		692	468.5	20.7577	59613.2	10732.4
693	509.3	11.868	7876.79	0	1078.52	2469.35		693	347.3	16.4938	5317.47	848.005		693	331.4	21.1157	10269.9	1865.33
694	532.2	11.8692	2677.04	6091.63	869.37	3456.17		694	283.2	23.2345	4066.28	650.346		694	376.3	26.1182	5073.02	927.174
695	360.3	11.8882	183.696	422.025	2366.98	678.346		695	223.1	7.25633	1787.73	286.848		695	418.2	10.7538	4214.86	770.847
696	509.1	11.9043	0	4220.83	0	0		696	997.3	13.1883	31828.6	5144.02		696	888.2	7.37717	3530.67	646.634
697	939.6	11.906	0	0	2911.47	0		697	389.2	13.144	17509.9	2840.47		697	470.1	8.04833	11587.9	2124.61
698	532.3	11.906	1463.31	2036.97	5357.42	2148.07		698	396.1	25.072	2282.02	371.472		698	882.3	7.34317	191398	35343.2
699	431.2	11.9223	1964.18	4995.6	0	0		699	479.8	15.022	6199.58	1026.21		699	467.2	25.0213	13969.7	2611.68
700	373	11.939	4323.74	1364.15	776.738	0		700	484.2	8.341	5348.76	885.363		700	247.1	17.1487	1696.81	317.308
701	882.9	11.9403	0	2436.39	0	0		701	373.1	39.678	7914.02	1316.59		701	331.2	21.5265	27474.9	5184.6
702	531.2	11.9727	252.96	2969.04	5556.49	14642		702	363.2	12.6112	2807.94	471.237		702	393.9	44.3345	2045.12	387.649
703	499.2	12.0102	0	3241.38	0	0		703	411	22.1125	43357.2	7346.05		703	460.3	4.63383	2784.69	531.218
704	606.3	12.0282	15339.3	17465.9	5071.8	0		704	713.3	6.125	6122.95	1044		704	245	41.3347	5592.68	1068.52
705	566.1	12.045	3937.82	0	0	0		705	412.2	7.561	5100.14	872.182		705	581.4	22.785	2207.05	427.878
706	647.3	12.045	5117.68	584.153	0	842.841		706	552.2	11.442	9073.8	1552.72		706	365.3	21.5447	4433.24	859.82
707	626.8	12.063	2243.87	0	0	0		707	111.2	15.944	3634.97	628.859		707	425.2	17.9985	19300.4	3755.7
708	584.3	12.063	802805	149247	45154.5	51536.3		708	313.1	6.37575	4391.49	761.519		708	569.3	21.8952	1829.55	357.522
709	303.6	12.0638	460.08	2089.01	0	0		709	455.2	8.199	7801.74	1353.47		709	948.4	13.6482	5507.26	1076.91
710	587.3	12.08	8461.41	5788.7	0	1497.92		710	304.3	21.899	7754.26	1346.76		710	627.4	21.563	3820.61	748.128
711	595.3	12.08	5705.77	436.884	0	1009.37		711	312.3	14.9878	32015.7	5564.62		711	508.3	9.528	1302.8	255.205
712	586.2	12.0803	79901.2	28213.7	7445	18277.5		712	543.2	10.3777	1467.03	257.206		712	413.3	26.1614	12131.5	2378.69
713	570.3	12.0808	18563.6	29271	17369	14634.5		713	481.2	21.793	5994.91	1052.6		713	541.4	19.2145	56165.6	11016.1
714	607.2	12.0893	23307.5	17545.1	0	2993		714	426.1	11.368	4396.01	775.654		714	416.2	6.79133	2573.88	506.485
715	622.1	12.098	14680.4	2015.69	1636.71	1347.36		715	498.2	9.918	6229.01	1100.01		715	382.3	23.6754	6329.3	1253.23
716	566.2	12.0985	2106.57	8271.15	614.005	2011.25		716	377.4	28.953	20483	3638.84		716	456.1	13.8145	4194.03	833.239
717	571.2	12.1153	2739.96	3003.38	6426.78	3687.86		717	481.2	15.2526	494772	87966		717	574.3	11.495	2358.7	470.19
718	587.2	12.1158	7403.02	6769.19	8697.5	6334.52		718	378.5	24.363	3985.34	710.019		718	463.3	23.0137	4636.19	926.433
719	548.3	12.133	10226.1	13095.7	25723.1	6985.21		719	520.2	10.3959	10555.8	1891.11		719	554.2	21.9523	3851.43	775.697
720	584.2	12.133	339823	887536	230848	330672		720	373	11.939	4323.74	776.738		720	152.2	19.282	9518.48	1917.75
721	606.2	12.133	60476	45114.7	23306.1	28544.1		721	317.3	20.216	9651.81	1734.37		721	359.3	5.1995	3912.48	790.532
722	623.2	12.133	5598.7	2978.79	0	408.44		722	394	14.774	4779.54	868.201		722	509.3	15.9448	52776.8	10718.7
723	567.3	12.1507	676.473	4888.38	1236.9	576.986		723	413.3	25.639	16169.4	2939.06		723	319.1	21.6343	2967.41	607.835
724	607.1	12.1507	1510.32	3687.46	6751.14	1597.8		724	456.3	13.941	4620.76	846.447		724	374.4	19.966	5906.49	1212.43
725	548.1	12.151	0	0	0	3653.63		725	369.3	21.492	4712.76	865.051		725	437.2	18.461	1917.45	394.067
726	571.3	12.151	2692.43	3389.45	0	4457.3		726	759.5	21.5535	5268.27	970.392		726	259.1	13.0445	13685.3	2848.46
727	608.3	12.151	3262.39	988.387	0	1748.45		727	400.3	8.341	4783.25	886.423		727	369.1	17.9198	5011.89	1046.78
728	566.3	12.151	4697.02	0	0	189.293		728	377.3	27.801	63037.5	11819.2		728	393	22.9578	5292.51	1117.69
729	607.3	12.151	0	1621.42	0	3218.95		729	631.3	23.2765	6405.22	1204.02		729	409.2	15.3137	42210.7	8974.5
730	585.2	12.1683	270382	228270	89471.6	86070.5		730	524.1	24.416	23434	4443.52		730	403.2	10.4372	11032.5	2353.87
731	296.3	12.169	2202.82	462.671	441.371	209.959		731	948.4	13.6482	3022.44	575.6		731	339.3	26.1528	81256.5	17447.2
732	586.3	12.186	47617.9	76028.6	31302.2	29779.2		732	470.2	7.933	7827.75	1496.15		732	667.8	7.41233	3479.54	754.629
733	634.8	12.186	177.855	2235.32	0	0		733	152	13.091	4841.31	926.296		733	437	11.309	2957.4	642.668
734	622.2	12.1862	2566.55	12046.2	539.002	3022.93		734	302.2	17.3565	20199	3875.78		734	479.3	22.0595	13609.6	2966.61
735	275.2	12.2025	821.5	8886.14	5155.92	5715.79		735	400.1	8.234	2380.57	457.952		735	638.2	17.9275	9662.43	2127.23
736	570.2	12.2378	13765.9	15721.6	0	21233.7		736	542.2	8.61583	15930.1	3069.65		736	582.5	22.7258	14066.9	3132.17
737	549.3	12.2387	4567.54	9171.6	12340.1	8890.95		737	395.2	21.7397	21018	4097.45		737	284.2	23.6273	2410.85	541.274
738	274.3	12.2538	27053.1	21603.9	48874.4	60507.2		738	481.1	15.909	6933.46	1352.71		738	402.2	10.45	27907.4	6270.38
739	587.1	12.2565	1553.84	0	0	2344.26		739	379.4	24.327	9605.04	1876.05		739	498.3	11.5275	5781.14	1305.01
740	275.1	12.258	6488.18	2129.53	0	1562.87		740	317.2	20.2362	8655.58	1694.45		740	377.3	28.865	15648.6	3542.53
741	607	12.2718	0	3150.6	0	1187.47		741	357.3	21.651	10533.6	2083.89		741	599.2	13.3257	4867.15	1102.33
742	275.3	12.2887	552.533	0	9718.36	1338.03		742	498.2	11.495	4013.1	794.458		742	261	0.294	2871.45	651.438
743	585.3	12.3223	55748.6	51902.8	27965.2	12540.3		743	459.2	15.1827	81691.5	16187.5		743	359.3	14.544	3658.25	831.263
744	111	12.3232	1505.2	3249.15	711.043	998.207		744	377.2	19.95	2745.4	545.388		744	259.2	13.126	5280.78	1202.5
745	318.4	12.3232	1346.2	20364.3	0	0		745	296.3	12.169	2202.82	441.371		745	355.1	20.0737	5561.95	1272.55
746	274.2	12.3255	10670	17163.8	7720.99	14429.3		746	569.2	21.8812	3875.54	790.996		746	483.1	9.564	901.612	208.583
747	340.3	12.3867	21493.8	19332.3	7264.94	2607.45		747	363.3	12.5268	6518	1331.98		747	484.2	9.634	1719.16	399.145
748	320.2	12.399	2908.82	173.247	227.325	0		748	380.2	10.4503	223092	45823.6		748	237	9.06033	4775.81	1114.05
749	318.3	12.4023	124667	48933.3	47965	132336		749	455.1	7.897	10286.4	2125.97		749	455.1	8.146	11017.9	2615.06
750	319.2	12.4221	11282.7	7668.33	3129.79	14035.2		750	507.2	9.546	34784.8	7226.37		750	537.1	6.75633	4180.15	993.499
751	362.4	12.4258	8982.21	7289.57	2701.88	1841.44		751	284.9	15.3055	1057.54	219.676		751	241.1	5.32583	7039.65	1686.37
752	319.3	12.4408	5030	1717.89	10576.7	2098.47		752	597.3	22.785	2967.11	618.367		752	223.1	18.9777	7450.78	1789.19
753	152.2	12.447	0	2357.15	1023.62	7510.81		753	543.5	21.58	7759.92	1618.13		753	382.2	10.5132	9631.23	2326.42
754	341.2	12.447	1077.74	2828.77	2424.73	5323.5		754	402.1	10.4918	59325.1	12380.7		754	585.3	12.3223	51902.8	12540.3
755	384.4	12.4544	3017.1	8257.92	0	332.596		755	416.2	6.79133	1669.92	350.221		755	439.2	13.6037	4437.29	1072.54
756	431	12.47	3705.14	976.701	0	0		756	622.2	12.1862	2566.55	539.002		756	566.2	12.0985	8271.15	2011.25
757	340.2	12.475	15425.3	1301.73	21917.6	27342		757	676.5	21.669	5511.49	1159.25		757	316.3	2.81925	6497.89	1580.64
758	319.4	12.488	4885.95	3049.87	2929.79	0		758	712.5	22.98	6039.26	1273.09		758	495.3	13.6832	4291.95	1046.12
759	385.4	12.488	7245.84	3253.97	0	2735.04		759	509.3	15.9448	46948.9	9942.61		759	263.2	21.5278	11601	2846.61
760	431.2	12.4935	189.189	9696.64	326.927	1025.77		760	317.1	20.4044	4221.98	894.785		760	317	17.6268	8180.59	2010.24
761	586.1	12.5155	3911.35	0	1438.31	5211.82		761	340.4	26.155	9588.8	2036.18		761	321.3	16.7233	4916	1211.97
762	384.3	12.5252	16899.4	8791.64	22385.9	25231		762	406.2	10.6837	6302.27	1346.71		762	508.1	9.57233	5712.79	1408.55
763	363.3	12.5268	6518	4669.13	1331.98	8200.5		763	273.8	7.37717	2077.82	446.101		763	441.1	15.2	1108.5	273.343
764	548.4	12.5328	963.655	2919.02	2777.78	10083.4		764	297.6	10.556	8824.6	1902.6		764	999.4	13.2117	5422.42	1342.71
765	385.2	12.5412	0	875.54	6472.8	1355.18		765	399.1	19.826	3699.2	801.693		765	301.1	17.7327	59187.1	14687
766	362.3	12.5537	44693.7	31317.5	33593.4	57497.4		766	309.1	9.53617	97450.2	21227.6		766	622.2	12.1862	12046.2	3022.93
767	363.4	12.5582	1303.66	2319.47	5983.89	726.472		767	396.1	8.25833	5675.24	1243.41		767	497.1	21.259	4895.08	1232.88
768	570.2	12.5597	4436.79	8406.86	6670.75	2627.55		768	285.3	22.7228	29869	6552.92		768	362.4	12.4258	7289.57	1841.44
769	586.2	12.5663	14378.3	9433.38	6846.64	10546.7		769	371.9	6.39417	4204.62	922.699		769	303.3	21.5978	16689.5	4250.58
770	359.4	12.577	0	6820.04	0	0		770	599.3	13.4216	5485.41	1205.92		770	279.9	0.610333	1231.31	314.036
771	428.3	12.577	612.375	4708.91	0	310.675		771	310.2	9.13542	102311	22787.1		771	548.3	10.1772	11693.6	2986.3
772	363.2	12.6112	2807.94	2517.5	471.237	0		772	467.3	21.403	4720.08	1051.58		772	357.2	6.19533	30141	7704.08
773	318.2	12.612	8684.61	3561.67	45545.9	8295.6		773	541.3	24.1318	4333.28	967.678		773	368.3	10.822	2000.16	511.567
774	428.4	12.6342	0	665.596	936.2	2882.88		774	513.5	26.3852	4563.41	1020.22		774	468.2	9.652	6616.68	1695.16
775	406.4	12.643	1090.28	4729.6	4353.72	3099.7		775	365.4	23.672	3649.07	816.139		775	587.3	12.08	5788.7	1497.92
776	406.3	12.6465	3893.25	1501.02	3019.8	2668.02		776	395	0.578	8346.26	1873.45		776	484.4	18.638	4608.55	1193.66
777	406.2	12.6487	3232.42	0	0	4792.36		777	555.5	20.5953	3668.92	826.098		777	377.3	27.801	25970.1	6755.87
778	888.7	12.665	2486.76	0	0	0		778	879.5	24.487	4757.28	1073.86		778	248.3	21.8993	2801.56	730.031
779	372.2	12.6747	4203.73	2468.08	7581.44	2817.77		779	460.2	13.64	10287.3	2322.3		779	373.2	43.753	3496.62	911.347
780	570.3	12.6844	8032.01	15647.4	18250	4625.53		780	396.4	24.327	6117.36	1383.1		780	524.3	24.1323	31947.5	8346.62
781	493	12.7017	0	0	0	2365.44		781	998.4	13.1623	11320.5	2562.61		781	241.2	5.52317	3943.2	1044.18
782	477.3	12.718	5367.6	3938.27	0	209.472		782	426.1	9.54925	18207.6	4125.07		782	400.2	8.23367	3009.62	802.723
783	384.4	12.736	2753.3	727.241	1202.86	2065.83		783	367.3	10.7927	29858.5	6776.43		783	322.1	5.328	12740.2	3441.96
784	499.3	12.7448	628.267	7373.47	577.498	661.491		784	441.2	14.9674	15198.6	3488.52		784	378.4	24.5094	12813.9	3469.34
785	362.2	12.752	3001.51	0	0	4967.16		785	472.1	7.36067	4043.9	930.898		785	405.1	10.6939	66231.6	18049.3
786	359.4	12.8192	891.264	0	0	3909.28		786	445.2	9.62833	30302.7	6981.07		786	727.4	22.787	3173.69	868.351
787	223.1	12.8362	860.22	596.226	656.644	3853.55		787	515.4	14.65	2925.25	675.423		787	326.2	6.58417	4833.16	1329.01
788	675.3	12.86	4068.52	1398.8	0	0		788	439.3	19.843	44643.3	10368.3		788	534	13.6398	27444.9	7550.85
789	598.2	12.896	13641.6	2860.61	0	1093.92		789	497.3	15.5365	24379.8	5678.22		789	289.2	9.4265	2788.27	770.785
790	413.2	12.9365	240.69	557.975	523.524	2934.31		790	570.4	21.4552	4565.7	1067.17		790	616.3	15.1297	8806.29	2466.68
791	675.4	12.949	4563.3	172.094	0	0		791	259.1	13.0445	13767.7	3218.29		791	510.3	15.926	13574.5	3803.11
792	551.1	12.9778	7835.2	7651.6	0	183.722		792	580.5	21.0268	5051.6	1186.72		792	394.1	6.745	19950.9	5600.83
793	110.9	12.9887	1982.38	1011.38	6128.3	3130.44		793	551.1	9.564	7034.89	1653.98		793	380.3	24.3921	6040.39	1714.54
794	598.1	13.002	4810.49	0	0	0		794	407.3	21.686	5141	1212.08		794	486.1	6.96333	12081.5	3429.37
795	600.3	13.0053	6651.17	3603.06	8604.36	2968.28		795	304.2	21.5267	37588.4	8872.2		795	426.2	9.60217	3193.75	908.918
796	371.9	13.0053	2613.45	0	4042.46	0		796	475.3	22.715	4304.57	1018.44		796	395.1	6.69233	6861.7	1966.83
797	562.3	13.0072	714.615	3164.1	643.006	6758.71		797	395.1	14.544	11071.3	2626		797	413.2	25.7022	23255.1	6699.2
798	551.2	13.02	18944.4	575.89	0	0		798	441.2	18.089	5592.56	1328.07		798	310.2	9.13542	97121.5	27982.4
799	390.1	13.037	4894.11	1533.81	0	225.685		799	555.4	20.6453	4994.37	1187.2		799	305.3	23.2943	12642.6	3647.58
800	259.1	13.0445	13767.7	13685.3	3218.29	2848.46		800	376.2	26.2957	3144.12	750.659		800	372.2	19.9868	6785.33	1958.66
801	354.2	13.0538	0	173.917	249.58	4842.26		801	393.2	9.581	4887.66	1171.32		801	368.2	10.8018	10543.5	3053.38
802	371	13.0605	8864.35	18521.4	0	8818.25		802	393.9	26.6168	1936.17	465.002		802	455.1	7.897	9878.93	2866.74
803	390.2	13.0605	462.16	3261.4	0	0		803	495.3	26.118	2982.09	717.235		803	101	0.578	2938.12	852.728
804	495.4	13.0762	4966.09	2663.23	477.439	0		804	425.2	17.9985	15230.1	3664.96		804	111.2	16.423	2195.29	637.257
805	152	13.091	3489.36	1509.77	2100.39	1577.31		805	687.5	21.5978	22507	5428.12		805	484.2	9.245	2568.56	745.722
806	367.1	13.091	4841.31	2239.14	926.296	0		806	346.2	21.704	2190.47	530.886		806	455.1	7.34375	42196.5	12256.9
807	999.3	13.0945	2020.49	6222.79	0	0		807	574.3	11.495	7725.21	1895.19		807	419.2	8.305	1256.52	367.195
808	372.2	13.104	0	984.168	5188.87	2988.34		808	399.1	22.715	3619.59	888.596		808	340.3	26.2243	9214.97	2701.45
809	653.2	13.1105	0	3709.39	350.528	159.67		809	292.8	15.1988	1490.13	366.257		809	570.3	12.6844	15647.4	4625.53
810	568.3	13.1213	7813.9	2974.73	4592.36	4514.1		810	285.2	22.8198	12619.5	3107.43		810	307.2	9.08092	37064.7	11029.8
811	259.2	13.126	8008.3	5280.78	892.428	1202.5		811	446.1	9.55483	13122	3254.24		811	559.3	22.8198	15004.7	4492.43
812	424.3	13.126	5093.9	0	309.815	0		812	325.1	21.5268	1952.52	487.775		812	555.5	20.5953	4986.93	1494.48
813	652.3	13.1267	9478.48	19820.9	217.736	1166.22		813	395.2	15.34	15087.9	3805.62		813	509.2	15.855	901.246	270.069
814	569.2	13.1275	827.966	7153.61	1035.15	0		814	555.1	9.564	3474.86	876.939		814	369.2	8.37583	32023.1	9631.25
815	568.2	13.1357	12713.9	13576.5	529.545	1089.16		815	303.2	21.527	5475.96	1396.53		815	511.3	26.3402	10262.3	3101.28
816	389.2	13.144	17509.9	21371.4	2840.47	1203.14		816	309.2	9.13217	372738	95651.2		816	537.4	25.3947	4129.13	1248.79
817	569.3	13.161	6249.94	917.444	598.758	933.787		817	497.3	21.1338	5729.82	1471.48		817	437.4	25.9517	5033.9	1522.82
818	998.4	13.1623	11320.5	27168.1	2562.61	394.291		818	318.1	17.2373	12870.4	3335.61		818	439.4	20.0553	6316.21	1914.75
819	652.2	13.1718	0	0	0	3971.2		819	482.3	21.935	4727.47	1239.63		819	441.7	11.7442	2572.11	780.795
820	409.2	13.1718	0	2389.62	0	3265.1		820	261.2	41.484	3425.92	899.862		820	521.4	26.8133	4149.49	1260.07
821	998.5	13.187	0	0	2322.9	0		821	381.3	21.811	3075.55	814.174		821	375.1	30.637	3405.24	1039.03
822	997.3	13.1883	31828.6	88442	5144.02	1653.4		822	378.2	19.9631	15172.4	4022.85		822	318.4	12.3232	3249.15	998.207
823	652.4	13.2117	1443.08	9178.54	2598.95	0		823	593.3	14.083	4507.69	1206.36		823	634.1	25.178	7090.24	2198.3
824	653.3	13.2117	2604.42	5422.42	0	1342.71		824	441.1	17.9992	5592.32	1499.09		824	570.2	12.5597	8406.86	2627.55
825	999.4	13.2117	2177.82	11146.5	1195.39	0		825	498.4	15.536	5943.6	1603.72		825	363.4	12.5582	2319.47	726.472
826	625.1	13.25	2531.28	0	0	0		826	537.3	25.1552	12429.7	3355.86		826	523.3	24.1325	112982	35390.8
827	600.2	13.2589	3665.44	4967.82	1689.63	5113.43		827	655.5	21.4824	5601.9	1518.21		827	367.3	10.7927	16544.9	5188.13
828	857.6	13.262	0	2619.26	0	0		828	911.3	9.564	3723.78	1016.26		828	265.2	23.2437	5244.07	1655.48
829	998.2	13.262	0	6790.08	0	0		829	479.3	24.0972	1809.42	493.855		829	428.3	15.3587	2494.85	787.934
830	997.4	13.3016	0	4815.61	1202.85	10930.7		830	421.3	23.8195	10185	2780.85		830	497.3	21.3657	5578.47	1767.6
831	469.2	13.303	4633.39	3899.56	310.724	2997.01		831	289.6	10.432	4115.23	1124.53		831	911.2	9.55483	3811.41	1208.86
832	620.2	13.3125	175.296	4102.2	0	560.178		832	459.3	15.289	42936.5	11736.2		832	383.2	7.18717	9798	3112.05
833	371	13.3192	6558.18	5354.41	19769.1	10072.1		833	468.2	21.119	3222.16	888.534		833	453.2	15.7883	1344.33	427.356
834	599.2	13.3257	14341.8	4867.15	706.524	1102.33		834	499.1	0.558833	2065.03	569.645		834	319.1	17.8767	970.781	310.922
835	324.1	13.333	831.764	4078.43	4357.62	0		835	479.3	21.5986	22761.9	6285.74		835	591.3	15.9289	32974.1	10587.1
836	324.3	13.339	2919.24	0	0	844.496		836	319.2	12.4221	11282.7	3129.79		836	656.5	21.5447	20815.4	6726.25
837	598.2	13.3449	3237.75	20562.2	2581.7	10795.8		837	552.3	11.549	6584.89	1827.89		837	540.4	19.2677	151298	48993.2
838	395.2	13.353	895.665	0	2652.88	0		838	379.2	25.1545	10091.1	2801.58		838	366.5	28.1837	22052.2	7143.2
839	373	13.356	3735.94	1151.38	0	2072.04		839	447.2	9.369	3167.2	884.507		839	369.2	21.0754	5437.8	1762.36
840	598.3	13.3683	44556.1	26788.3	1139.73	1219.45		840	284	5.29017	5168.45	1461.16		840	520.3	10.4688	5972.52	1941.96
841	151.9	13.3977	1079.08	3570.14	0	0		841	569.4	21.244	23924.8	6768.13		841	513.6	26.5635	2616.08	852.654
842	620.3	13.3977	178.356	3631.25	0	0		842	561.5	21.554	29921.6	8480.07		842	381.4	21.97	1280.37	417.387
843	599.3	13.4216	5485.41	9575.28	1205.92	0		843	301.2	17.255	174671	49534.7		843	305.1	23.5395	4906.44	1617.38
844	629.2	13.445	2704.42	0	0	0		844	535.3	26.791	4979.3	1416.85		844	259.2	36.7498	7249.45	2396.07
845	613.3	13.5002	1705.07	2724.48	191.927	0		845	359.3	10.1505	7052.97	2008.15		845	404.2	8.571	622.446	206.219
846	454.3	13.533	775.92	0	0	3182.64		846	259.1	10.857	8726.32	2485.68		846	281.3	21.492	45243.3	15024.1
847	495.1	13.5518	658.956	5211.19	0	469.482		847	358.2	21.598	4758.42	1358.46		847	361.3	26.1358	19711	6611.62
848	416	13.5687	885.1	1554.57	1388.11	3078.74		848	681.4	21.616	2508.07	716.504		848	395.1	14.544	4656.41	1567.06
849	575.3	13.5717	11920	26726.7	4191.71	11223.2		849	309.2	8.73208	169312	49129.3		849	316.1	7.39583	83548.8	28416.5
850	454.1	13.5782	7221.78	13682.8	0	329.126		850	591.3	15.9289	37599	10958.3		850	457.2	8.11025	4420.27	1514.47
851	439.2	13.6037	0	4437.29	1898.64	1072.54		851	566.2	12.0985	2106.57	614.005		851	281.3	21.811	40263.2	13828.5
852	438.2	13.6213	12479.7	30103.4	22005.6	26497.9		852	413.2	25.7022	19882.8	5801.63		852	626.8	12.063	149247	51536.3
853	415.2	13.622	11577.2	18266.9	7245.81	13529.6		853	453.3	20.5598	6414.8	1880.98		853	395.2	6.73967	5317.57	1837.04
854	534.3	13.622	12889.5	4713.22	1712.12	3080.57		854	152.1	19.524	3000.86	880.15		854	453.4	15.9802	6703.84	2321.57
855	852.4	13.622	4046.3	0	1214.11	421.371		855	428.3	10.9562	12571	3688.1		855	375	29.018	1565.51	542.935
856	805.2	13.6227	0	0	2844.06	0		856	318.4	14.508	6743.72	1997.23		856	481.3	21.952	65839.8	22839.7
857	493.2	13.6227	0	0	5531.61	8760.46		857	509.2	16.15	8415.29	2495.2		857	367.2	8.42983	1.29938e+06	451508
858	416.2	13.6392	1153.2	6732.93	3035.6	434.591		858	395.2	10.4155	8027.97	2380.59		858	357.2	21.651	9434.37	3292.05
859	852.3	13.6392	327.36	5877.33	1768.95	2477.51		859	367.3	8.36167	14345.5	4290.16		859	441.4	18.6103	32173.1	11234.9
860	534	13.6398	0	0	0	2331.44		860	534.3	13.622	4046.3	1214.11		860	509.2	11.833	5507.73	1926.42
861	494.2	13.6398	35107.7	27444.9	855.297	7550.85		861	579.5	22.803	2652.67	796.288		861	444.1	9.53617	8475.76	2967.08
862	437.2	13.64	103250	119395	98724.4	92027.2		862	362.4	12.4258	8982.21	2701.88		862	520.2	10.3959	3252.08	1139.93
863	460.2	13.64	1212.72	0	4108.8	1286.66		863	219	0.542	3298.3	993.407		863	562.5	21.5798	3470.65	1222.07
864	534.2	13.64	15796.1	32221.4	2308.42	1989.19		864	421.2	23.796	10831.6	3266.89		864	368.3	16.4934	5286.4	1867.69
865	575.2	13.64	10287.3	0	2322.3	0		865	540.3	24.1583	7843.35	2383.84		865	580.5	21.0268	12394	4387.07
866	948.4	13.6482	3022.44	5507.26	575.6	1076.91		866	377.3	28.865	24477.9	7514.58		866	152.1	14.6342	1772.3	628.213
867	415.1	13.649	11615.5	7266.34	14622.7	6325.11		867	450.2	10.981	5730.3	1767.21		867	511.3	16.0682	8745.78	3114.43
868	535.3	13.6568	3732.93	6878.54	0	211.93		868	360.3	30.407	16828.8	5223.86		868	495.3	25.7468	7273.15	2600.1
869	851.4	13.6568	5783.71	11650	2842.77	6385.76		869	325.2	21.571	25989	8071.47		869	283.2	21.5451	5268.19	1892.86
870	453.2	13.6573	101688	118801	134471	52081.1		870	377.3	19.998	28180.1	8860.62		870	540.3	24.1583	8603.07	3095.73
871	536.3	13.658	4980.94	1300.99	176.394	0		871	279.1	20.127	11494.5	3655.9		871	599.4	21.8643	21825.9	7880.77
872	359	13.6752	0	0	0	5943.5		872	481.4	23.778	6889.48	2200.83		872	727.6	22.7492	3365.01	1215.15
873	245.1	13.6752	449.628	1638.19	1328.46	2875.9		873	379.4	23.2168	7610.04	2454.18		873	526.2	9.95833	2750.1	1005.63
874	495.3	13.6832	9982.74	4291.95	800.022	1046.12		874	244.2	0.666	3112.16	1004.89		874	405.2	10.7261	18731.9	6873.74
875	438.1	13.6913	5083.73	1450.87	11560.9	5798.57		875	205.1	17.2451	15436.4	5007.03		875	301.2	17.255	181452	67586.7
876	535.2	13.693	7127.17	1939.99	631.455	827.877		876	532.2	11.8692	2677.04	869.37		876	584.2	12.133	887536	330672
877	453.1	13.7003	98566.7	91689.1	94768.6	85102.7		877	327.2	23.211	3378.14	1103.97		877	411.3	22.8023	42648.1	16023.6
878	454.2	13.7112	19761.7	16769.9	29909.4	28294.2		878	682.4	21.687	4390.21	1439.15		878	302.3	20.2207	1484.11	558.542
879	372.1	13.729	4110.07	7066.79	3959.96	5282.14		879	437.3	18.371	772.2	253.582		879	607	12.2718	3150.6	1187.47
880	455.2	13.729	45974.4	31150.4	18046.5	14272.1		880	480.3	21.9152	1471.28	483.77		880	585.2	12.1683	228270	86070.5
881	948.5	13.746	3149.53	595.797	0	0		881	606.3	12.0282	15339.3	5071.8		881	419.2	26.6956	3005.35	1141.54
882	439.3	13.7602	0	442.102	3888.65	220.686		882	585.2	12.1683	270382	89471.6		882	956.3	15.04	463.22	176.934
883	433.2	13.772	2917.78	5474.28	0	0		883	449.4	22.8355	2145.61	710.939		883	598.2	12.896	2860.61	1093.92
884	456.2	13.782	6502.56	1444.47	791.963	3054.22		884	394.2	5.168	5443.21	1806.03		884	436.1	11.3635	21431.7	8253.16
885	494.1	13.782	7936.35	839.807	763.667	0		885	305.1	21.527	2090.88	695.22		885	377.4	28.953	20426.6	7866.21
886	468.3	13.8	6287.86	502.977	0	1507.5		886	403.1	8.48617	25426.2	8561.1		886	483.4	21.616	830.003	321.15
887	456.1	13.8145	0	4194.03	661.471	833.239		887	453.3	15.9205	19838	6692.66		887	280.1	0.664833	5170.13	2001.09
888	454.1	13.8234	8074.18	0	9893.66	1884.11		888	340.3	12.3867	21493.8	7264.94		888	395.2	15.34	12867.1	5001.08
889	493.1	13.8987	0	0	4011.73	803.459		889	373.8	9.56725	2190.47	741.657		889	445.1	9.55608	27973	10907.8
890	393	13.9143	0	6879.59	5813.65	9118.33		890	418.2	10.4505	6142.88	2084.34		890	284.9	15.3055	4312.18	1686.54
891	372.9	13.9143	1037.31	0	0	3122.83		891	543.4	21.492	6407.14	2185.07		891	394	18.0877	8400.72	3288.11
892	454	13.9162	2341.06	0	6576.24	0		892	409.2	15.3137	26438.9	9105.51		892	634.8	12.186	76028.6	29779.2
893	934.7	13.9323	0	0	0	2654.24		893	540.5	28.6052	2370.96	819.575		893	376.2	23.758	861.358	337.821
894	438.2	13.9387	9720.57	11307.1	9798.95	8017.41		894	286.4	22.8198	12479.3	4332.19		894	652.4	16.033	3023.27	1194.82
895	410.2	13.941	9816.55	1887.32	1463.14	1030.68		895	436	11.779	4507.58	1581.55		895	569.2	21.8812	7239.85	2914.32
896	456.3	13.941	4620.76	2454.9	846.447	1956.67		896	459.3	14.97	39720	13959		896	411.3	15.749	2438.92	1000.36
897	415.3	13.9515	4370.77	2904.66	695.363	8211.63		897	575.3	13.5717	11920	4191.71		897	403.1	8.48617	21830.4	8993.26
898	453.2	13.9908	20461.6	28717.6	22031.1	49788		898	372	29.4035	1381.71	487.805		898	551.1	9.564	1595.81	661.568
899	373.3	14.012	2696.64	0	0	0		899	303.2	22.006	60456.5	21411.5		899	151.9	21.3487	3023.51	1255.58
900	152.1	14.0378	624.88	765.552	6195.39	1508.51		900	237.1	9.032	5382.4	1917.36		900	397.2	21.669	1715.31	716.754
901	609.2	14.048	2550.38	0	0	0		901	367.2	8.42983	1.74993e+06	625071		901	310.2	8.69533	19056.7	7974.27
902	609.3	14.0635	4303	4930.13	2858.02	3335.21		902	535.1	0.594833	2863.06	1024.86		902	575.3	13.5717	26726.7	11223.2
903	593.3	14.083	4507.69	774.195	1206.36	2430.44		903	377.1	31.346	4154.71	1496.89		903	275.2	8.19767	13364.4	5614.94
904	593.4	14.09	0	1830.5	2742.43	2791.89		904	295.2	8.943	3647.73	1320.95		904	852.3	13.6392	5877.33	2477.51
905	555.2	14.1353	4722.21	14583	0	8288.74		905	886.3	7.36067	5582.93	2024.96		905	437.2	23.8892	4814.08	2047.64
906	612.3	14.1628	6404.15	6363.37	0	0		906	565.5	23.2293	9714.51	3541.46		906	317.1	20.4044	4240	1806.48
907	532.3	14.1805	2193.9	3595.96	2906.52	0		907	688.5	21.484	11213.1	4106.46		907	535.2	13.693	1939.99	827.877
908	532.2	14.201	3308.26	3904	9356.81	5878.54		908	450.2	0.595	8950.89	3278.76		908	283.3	23.211	75688.7	32374.9
909	554.2	14.207	43466.6	22267.9	26433.2	20237.3		909	440.5	21.793	62068.5	22804.7		909	429.1	25.6498	4220.08	1811.6
910	570.3	14.2098	9859.06	10151.6	11530.1	0		910	586.1	12.5155	3911.35	1438.31		910	507.2	9.546	8098.26	3489.52
911	394.9	14.2202	0	0	0	2202.82		911	346.3	16.44	64008.6	23556.4		911	622.4	17.8927	10539.6	4551.07
912	570.2	14.2202	12456.1	8341.72	7820.3	23033.8		912	541.4	19.2145	26199.8	9665.62		912	607.1	12.1507	3687.46	1597.8
913	571.3	14.2257	10674.3	13478.9	11191.9	6317.99		913	349.1	37.0275	12508.1	4624.78		913	482.4	21.9678	988.877	429.469
914	555.3	14.243	5310.09	8258.62	26674.5	11975		914	556.1	11.3042	4104.93	1528.32		914	622.3	17.477	23843	10363
915	302.3	14.3172	2370.38	811.903	3867.38	3134.12		915	371	39.127	16865.7	6286.64		915	263.3	21.687	1999.95	872.244
916	531.2	14.3528	1536.89	0	2428.02	289.473		916	420.3	22.1295	1802	672.494		916	540.3	24.4528	5805.31	2533.19
917	554.3	14.3677	45336.4	67837.5	46427.3	60883.7		917	395	21.066	9243.16	3480.89		917	361.2	0.557667	1578.63	691.087
918	515.3	14.4233	3718.01	6810.68	13400.5	12816.2		918	341.2	21.438	4034.22	1529.34		918	453.2	13.6573	118801	52081.1
919	318.3	14.4938	603.216	4045.04	6067.85	4947.34		919	479.3	22.0595	4768.38	1808.63		919	466.3	17.273	989.057	434.277
920	515.2	14.508	6743.72	1671.82	1997.23	3181.52		920	416.1	4.17458	7423.12	2835.48		920	369.3	8.46417	25297.5	11141.6
921	318.4	14.508	7184.68	0	0	2032.69		921	399.2	8.20742	13764.8	5261.39		921	553.2	21.917	6405.55	2835.43
922	437.3	14.5138	0	4194.13	0	0		922	372.1	29.2955	3699.17	1416.93		922	435.2	22.2402	2102.95	930.975
923	612.1	14.5322	1356.8	3602.02	0	187.646		923	412.2	22.802	3715.16	1424.28		923	503.1	15.2	4358.53	1938.31
924	359.3	14.544	11071.3	3658.25	2626	831.263		924	318.3	12.4023	124667	47965		924	628.5	21.563	14671.4	6527.62
925	395.1	14.544	6058.96	4656.41	834.405	1567.06		925	382.2	0.613	645.333	248.323		925	479.8	15.022	968.614	431.205
926	468.2	14.562	5225.65	2546.88	0	0		926	584.2	12.133	60476	23306.1		926	498.2	9.918	3348.87	1497.46
927	555.2	14.597	14556.5	22496.5	2117.11	12106.3		927	368.2	8.43017	365772	141023		927	379.3	21.6248	130743	58543.2
928	152.1	14.6342	4367.05	1772.3	4265.02	628.213		928	622.4	17.4597	24346.6	9390.2		928	534	9.595	3836.54	1724.05
929	497.1	14.6403	2323.97	5652.81	1033.78	0		929	711.5	22.856	4295.79	1667.79		929	316.1	2.7955	3256.46	1472.11
930	515.4	14.65	2925.25	0	675.423	0		930	272.9	21.0442	50051	19444.8		930	560.2	22.8198	14999	6796.72
931	638.2	14.688	0	593.439	3868.8	0		931	394.1	6.745	11668	4541.16		931	296.3	12.169	462.671	209.959
932	111	14.6955	2133.37	5395.06	4203.13	535.486		932	394.2	23.211	17710.3	6910.55		932	372.1	13.729	31150.4	14272.1
933	549.3	14.721	3717.11	390.332	576.288	0		933	521.4	23.2883	3889.49	1522.65		933	355.3	19.9866	14837.2	6812.78
934	333.1	14.7312	446.26	2597.62	191.149	183.452		934	372.1	13.729	45974.4	18046.5		934	394.2	42.4665	2321.07	1065.88
935	437	14.739	3024.18	916.425	0	0		935	395.1	25.1733	1429.23	564.598		935	431.2	5.54	13598.2	6250.25
936	395.3	14.7668	2263.12	2344.26	1392.32	0		936	281	22.626	2674.38	1056.61		936	555.1	9.564	2410.57	1112.39
937	394	14.774	4779.54	1180.43	868.201	928.068		937	728.5	22.75	18311.3	7257.91		937	599.5	4.48783	3343.75	1543.2
938	827.3	14.8115	0	0	2385	0		938	498.2	8.84233	1405.03	559.248		938	492.4	24.3607	19013.8	8907.18
939	393	14.863	10841.7	3561.05	4965.43	3923.25		939	579.2	22.945	3135.36	1248.08		939	571.3	14.2257	13478.9	6317.99
940	482.3	14.9115	0	14824.9	4524.3	0		940	568.4	21.4118	49074	19615.1		940	570.4	21.4552	5648.97	2657.42
941	940.3	14.9298	0	5006.5	872.597	0		941	393.1	37.1373	6337.81	2533.3		941	484.1	9.51375	4783.92	2270.08
942	428.1	14.934	4857.98	0	226.241	0		942	261.1	17.3052	2957.5	1187.03		942	390.2	13.0605	18521.4	8818.25
943	479.2	14.952	4154.71	645.99	0	383.483		943	368.1	8.979	3034.67	1220.38		943	394	2.953	4115.21	1968.47
944	551.3	14.952	4129.37	2175.81	455.076	0		944	440.4	24.364	80930	32666.4		944	376.2	26.2957	15216.7	7286.25
945	941.4	14.9653	5343.58	6190.08	0	0		945	395	11.726	3256.09	1315.02		945	600.5	21.5798	6693.46	3206.34
946	441.2	14.9674	15198.6	7324.6	3488.52	180.366		946	295	15.5012	2310.65	934.555		946	305.2	9.25967	3576.19	1713.89
947	313.3	14.969	9737.73	1542.14	0	0		947	631.5	23.1983	7577.94	3089.73		947	497.2	11.5367	6646.16	3192.58
948	478.2	14.969	5929.54	4758.39	0	0		948	413.3	21.5803	10618.7	4364.82		948	365.4	23.672	1071.45	515.049
949	459.3	14.97	39720	0	13959	0		949	241.1	5.771	3264.88	1349.62		949	416.1	6.726	7585.85	3653.63
950	498.1	14.987	6962.56	3854.99	209.598	0		950	152.2	7.119	1912.66	792.215		950	371.9	38.0585	874.034	423.021
951	528.3	14.987	2857.99	969.73	0	575.588		951	553.2	21.917	13443.4	5592.22		951	399.2	8.20742	10634.9	5175.02
952	312.3	14.9878	32015.7	11097.9	5564.62	0		952	439.3	16.37	3227.08	1342.56		952	309.2	8.73208	94880.2	46339.1
953	427.3	14.9878	3855.3	0	5417.66	0		953	173.2	37.2188	323.3	134.869		953	364	9.475	2066.71	1011.31
954	497.2	14.9943	51433.8	37686.8	4814.29	4374.12		954	393.1	3.183	7944.53	3316.7		954	457.4	16.387	2046.38	1002.47
955	284.8	15.0018	0	2537.57	0	0		955	382.3	23.6754	9783.14	4091.62		955	341.2	21.438	1926.03	948.298
956	313.1	15.0018	0	3331.32	0	0		956	523.3	24.1325	49144	20780.4		956	395.3	24.364	12141.9	5986.14
957	461.3	15.0018	3464.45	5464.8	0	0		957	261.2	7.419	4108.8	1742.62		957	284.2	23.211	9946.29	4929.57
958	470.3	15.005	11819	0	0	0		958	261	3.431	3370.8	1435.42		958	688.5	21.484	2555.7	1269.16
959	478.8	15.005	7997.92	3187.25	452.94	0		959	379.3	16.192	2881.39	1231.42		959	439.3	13.7602	442.102	220.686
960	482.2	15.005	136225	96682.9	16421.9	10244.2		960	333.1	14.7312	446.26	191.149		960	570.3	12.0808	29271	14634.5
961	503.3	15.005	2655.3	2216.47	266.668	0		961	405.1	11.035	9380.65	4023.47
962	470.8	15.005	5650.04	2489.06	0	0		962	617.3	16.635	3963.04	1700.82
963	939.4	15.0119	92331.3	61530.9	172.355	446.407		963	886.2	7.37933	8946.29	3849.75
964	427.2	15.0202	57774.6	62130.6	2561.93	5697.54		964	476.2	9.885	13051.9	5622.24
965	312.2	15.0202	0	9819.3	0	1253.4		965	471.3	22.7672	6266.61	2704.71
966	293.2	15.022	6199.58	2270.28	1026.21	216.328		966	600.5	19.613	4781.06	2069.4
967	409.1	15.022	16006.7	968.614	2216.72	431.205		967	369.1	17.9198	2886.38	1250.27
968	428.2	15.022	14039.5	13158.2	473.753	0		968	319.2	21.545	4605.9	1996.67
969	940.4	15.022	56080.7	31780.9	222.521	0		969	411.2	24.682	2727.38	1184.91
970	479.8	15.022	2524.75	930.962	0	0		970	384.4	12.736	2753.3	1202.86
971	293.7	15.0373	0	2675	0	0		971	655.3	15.43	7575.34	3312.25
972	471.2	15.04	4664.53	0	0	0		972	354.2	21.0975	9219.15	4038.89
973	956.3	15.04	6135.69	463.22	333.615	176.934		973	593.3	15.9095	1022.26	448.17
974	770.6	15.04	5261.68	169.862	0	0		974	152.2	19.282	4393.85	1942.24
975	631.3	15.0563	3674.86	4005.86	0	0		975	368.3	16.4934	7175.97	3185.4
976	371	15.058	15297.7	7594.68	0	0		976	394.1	0.505167	1315.2	584.807
977	961.3	15.0738	0	2321.09	0	0		977	497.1	14.6403	2323.97	1033.78
978	654.4	15.0738	523.989	6735.06	0	200.209		978	599.4	21.5449	15702.5	7034.01
979	549.2	15.076	3029.33	1383.54	0	183.321		979	639.4	16.511	8882.43	3986.14
980	941.3	15.076	13899.8	5700.1	0	323.984		980	470.2	7.366	9340.8	4207.85
981	721.9	15.076	6086.22	309.411	0	0		981	430.2	5.496	95370.3	43129.4
982	427.1	15.0767	7195.14	0	5826.13	697.902		982	675.7	26.135	9854.44	4464.76
983	498	15.092	0	3984.71	0	0		983	578.4	19.6588	17179.3	7821.57
984	955.4	15.093	7007.83	1496.14	0	0		984	689.4	21.669	4203.69	1918.91
985	460.2	15.1092	27493.9	8490.6	1244.43	1471.29		985	421.2	10.724	3462.26	1582.72
986	617.4	15.1117	1826.88	0	2519.62	0		986	393	14.863	10841.7	4965.43
987	616.3	15.1297	3245.72	8806.29	10066.7	2466.68		987	539.3	24.097	27917.4	12803.5
988	312.1	15.1365	5711.79	655.54	0	4698.89		988	330.2	3.838	6222.26	2854.58
989	718.3	15.1375	3310.25	2841.91	0	0		989	600.2	13.2589	3665.44	1689.63
990	566.2	15.1455	3039.87	3803.28	192.792	173.863		990	411.3	22.8023	40710	18802.9
991	292.9	15.147	3784.99	415.427	0	261.938		991	429.4	24.6855	2639.07	1219.01
992	483.1	15.1557	0	0	423.055	5037.38		992	338.3	26.188	298390	138699
993	478.3	15.1645	13018.9	0	0	0		993	359.1	16.139	5541.85	2580.81
994	460.3	15.182	33881.9	38208.8	4661.98	4617.51		994	562.4	21.651	11931.6	5596.8
995	459.2	15.1827	81691.5	120769	16187.5	10423.6		995	318.4	12.3232	1505.2	711.043
996	482.2	15.1853	116785	271014	16452.5	19880.5		996	306.1	5.30225	12357.8	5879.78
997	292.8	15.1988	0	2546.02	0	0		997	586.2	12.5663	14378.3	6846.64
998	527.2	15.1988	1490.13	4654.75	366.257	515.417		998	359.3	23.6797	23290.7	11141.3
999	441.1	15.2	8917.39	4358.53	459.098	1938.31		999	261	0.294	2709.7	1301.79
1000	503.1	15.2	4697.31	1108.5	0	273.343		1000	523.2	19.95	90414.5	43672.9
1001	617.5	15.2008	0	0	3662.61	199.887		1001	434.1	9.971	17499.9	8456.66
1002	249.3	15.217	0	3023.53	0	0		1002	355.1	29.857	5055.16	2448.34
1003	461.2	15.217	5175.05	5948.82	0	179.005		1003	455.2	7.364	29191.2	14191.3
1004	617.2	15.217	1302.62	7489.08	3249.13	523.345		1004	525.2	9.81283	4259.67	2072.53
1005	410.3	15.2342	661.365	3312.94	378.802	0		1005	377.2	30.619	24885.8	12161.3
1006	499.1	15.235	2869.72	0	0	0		1006	355.2	19.9945	4263.05	2084.84
1007	654.3	15.2515	21038.2	16432.3	12421.7	12532.5		1007	851.4	13.6568	5783.71	2842.77
1008	499.2	15.2522	5280.56	9352.55	251.657	1017.63		1008	279.3	17.309	4963	2451.12
1009	337.1	15.2526	10982.6	9612.48	1062.85	1104.21		1009	377.3	8.181	7702.69	3832.63
1010	481.2	15.2526	494772	1050738	87966	74102.6		1010	365.3	21.5447	8134.57	4051.22
1011	372.3	15.253	3515.42	0	0	0		1011	377.2	7.791	6576.82	3281.76
1012	638.3	15.2613	26934.6	21717.9	18364.9	30407.3		1012	468.5	20.7577	23197.9	11581.5
1013	285.3	15.2703	2625.26	5122.47	160.87	0
1014	718.8	15.2703	323.769	4347.09	0	168.266
1015	961.4	15.2703	9097.99	7300.91	0	0
1016	504.2	15.271	6803.31	1464.44	0	0
1017	497.2	15.2792	52360.2	41701.2	1093.85	4365.87
1018	939.4	15.2792	97485.8	74879.7	178.411	255.794
1019	962.4	15.288	7412.58	1058.21	0	0
1020	459.3	15.289	42936.5	18832.9	11736.2	0
1021	284.9	15.3055	1057.54	4312.18	219.676	1686.54
1022	441.2	15.306	16867.8	3357.06	1626.35	1910.47
1023	638.4	15.307	17865.2	29152	40413.4	3398.44
1024	409.2	15.3137	26438.9	42210.7	9105.51	8974.5
1025	654.4	15.3235	0	7569.46	0	0
1026	470.2	15.3235	3684.44	6153.14	0	0
1027	498.3	15.324	11172.8	0	0	0
1028	941.4	15.324	9564.37	6216.83	0	0
1029	955.3	15.324	4109.89	988.338	0	0
1030	395.2	15.34	2369.11	3474.42	3332.83	7107.32
1031	639.3	15.34	15087.9	12867.1	3805.62	5001.08
1032	567.3	15.341	5648.97	1696.58	0	0
1033	497.1	15.3583	0	0	975.234	2481.6
1034	428.3	15.3587	3387.65	2494.85	0	787.934
1035	640.3	15.359	2708.3	0	252.037	0
1036	616.2	15.3688	6391.98	1082.87	3738	3013.58
1037	295.2	15.3767	643.104	3846.74	0	0
1038	297.2	15.377	3270.61	0	288.339	0
1039	941.5	15.412	2856.9	0	0	0
1040	482.3	15.412	22383.1	5747.25	15282.7	7253.86
1041	617.4	15.412	983.143	419.091	2412.67	4844.68
1042	513.3	15.4298	0	5242.76	0	818.477
1043	655.3	15.43	7575.34	5433.61	3312.25	4193.36
1044	152	15.448	1102.99	355.365	0	8056.73
1045	639.4	15.448	3126.93	12336.9	5991.61	15663.9
1046	372.8	15.448	367.488	3030.72	0	0
1047	427.1	15.465	2075.48	0	262.246	5279.21
1048	513.2	15.483	4907.02	0	0	0
1049	295	15.5012	2310.65	3968.71	934.555	0
1050	498.4	15.536	5943.6	2541.46	1603.72	0
1051	497.3	15.5365	24379.8	36646	5678.22	2558.55
1052	513.4	15.5372	0	9991.56	975.838	0
1053	441.3	15.554	4600.99	2908.29	0	0
1054	498.3	15.5542	446.002	9933.4	0	0
1055	279.3	15.607	3292.5	954.685	0	0
1056	616.4	15.6083	959.79	4430.87	2599.29	7472.95
1057	639.2	15.6253	0	4449.57	932.15	0
1058	452.2	15.661	20697	7107.63	461.543	579.103
1059	293.3	15.678	2926.66	0	0	1081.92
1060	482.1	15.7325	0	10701.4	2062.75	0
1061	394	15.749	5642.37	2438.92	756.429	1000.36
1062	411.3	15.749	3821.87	608.522	271.93	0
1063	393.2	15.7588	0	0	0	10225
1064	638.3	15.7588	11647.3	10376.8	1149.73	16081.9
1065	151.9	15.7855	868.284	5562.82	963.983	0
1066	453.2	15.7883	6531.3	1344.33	4548.11	427.356
1067	509.2	15.855	18627	901.246	1338.79	270.069
1068	452.1	15.8558	7141.89	4692.76	339.359	0
1069	592.2	15.903	0	5993.6	3533.14	0
1070	481.1	15.909	6933.46	0	1352.71	0
1071	260.9	15.9095	1022.26	5014.5	448.17	358.83
1072	593.3	15.9095	5355.41	4209.26	210.613	0
1073	439.2	15.9145	4982.07	3696.82	3925.1	173.606
1074	453.3	15.9205	19838	5633.02	6692.66	4216.68
1075	510.3	15.926	20487.8	13574.5	1929.37	3803.11
1076	591.3	15.9289	37599	32974.1	10958.3	10587.1
1077	111.2	15.944	3634.97	1816.03	628.859	0
1078	509.3	15.9448	46948.9	52776.8	9942.61	10718.7
1079	632.3	15.962	4877.77	548.72	0	1619.82
1080	592.3	15.9622	25130	12136.8	1046.22	1793.68
1081	453.4	15.9802	2719.13	6703.84	0	2321.57
1082	372.9	16.0035	752.6	0	2973.87	0
1083	392.9	16.0245	0	0	0	4464.77
1084	591.2	16.033	14238.2	3023.27	0	1194.82
1085	652.4	16.033	4174.77	1549.57	268.378	188.908
1086	593.4	16.068	5311.16	544.781	0	0
1087	511.3	16.0682	13002.3	8745.78	522.629	3114.43
1088	370.9	16.139	9686.28	0	0	0
1089	359.1	16.139	5541.85	4680.44	2580.81	0
1090	509.2	16.15	8415.29	2517.26	2495.2	5857.63
1091	511.1	16.157	3388.76	0	0	0
1092	260.9	16.1875	1302.28	1215.47	1405.22	5537.61
1093	379.3	16.192	2881.39	0	1231.42	543.049
1094	244.9	16.2543	0	353.485	3352.25	195.046
1095	319.2	16.2907	2008.59	3027.99	5080.17	1846.74
1096	941.7	16.299	2097.55	0	0	0
1097	111	16.3007	1346.2	0	2451.15	3678.51
1098	373	16.316	2531.55	645.506	0	600.497
1099	151.8	16.3262	0	0	2480.96	0
1100	393.9	16.3335	512.16	0	290.57	4474.63
1101	347.4	16.352	835.28	3772.08	485.704	0
1102	509.4	16.352	0	4438.49	201.307	0
1103	655.2	16.3625	610.97	374.919	3040.71	1194.82
1104	439.3	16.37	3227.08	5938.18	1342.56	475.291
1105	279.1	16.387	6118.88	2046.38	273.931	1002.47
1106	457.4	16.387	901.303	4014.22	0	0
1107	111.2	16.423	4091.73	2195.29	377.296	637.257
1108	346.3	16.44	64008.6	33367.3	23556.4	21735
1109	346.4	16.4463	0	0	8723.99	6230.25
1110	319.3	16.4758	1672.7	2610.78	0	0
1111	368.3	16.4934	7175.97	5286.4	3185.4	1867.69
1112	347.3	16.4938	5317.47	6204.65	848.005	4236.55
1113	639.4	16.511	8882.43	2140.33	3986.14	1932.87
1114	259.1	16.5233	984.206	612.162	3203.52	0
1115	616.2	16.5428	1527.03	2548.18	1521.61	3085.45
1116	321.2	16.5467	6698.03	6040.39	671.357	906.72
1117	281.2	16.6175	2623.09	4069.33	0	668.714
1118	144.3	16.6315	356.31	0	2878.22	0
1119	321.1	16.6345	0	5510.88	0	0
1120	617.3	16.635	3963.04	1978.87	1700.82	1916.49
1121	281.3	16.7053	7940.05	10761.4	168.598	931.481
1122	959.8	16.706	2336.24	0	0	0
1123	321.3	16.7233	0	4916	0	1211.97
1124	512.3	16.7943	627.086	11225.1	0	0
1125	512.4	16.813	8305.58	8999.6	0	0
1126	371.8	16.8292	684.76	3384.41	0	440.85
1127	605.3	16.83	5612.81	3507.45	0	0
1128	397.1	16.9175	910.508	258.495	1056.67	2428.79
1129	110.9	16.971	0	2662.72	446.711	0
1130	346.1	17.008	4241.78	649.417	254.596	0
1131	359.4	17.025	4932.02	2307.6	0	0
1132	371.2	17.042	7551.46	12727.4	0	0
1133	317	17.0602	3550.05	315.596	4850.21	0
1134	279	17.1135	0	0	5130.05	3013.93
1135	318.2	17.131	0	3357.95	0	537.432
1136	373.2	17.132	4171.71	1322.18	0	2763.57
1137	247.1	17.1487	2450.03	1696.81	4865.81	317.308
1138	205	17.1512	2295.07	2790.92	3268.27	6814.74
1139	318	17.1667	1546.27	704.779	2794.96	2761.79
1140	279.2	17.176	9243.88	6953.71	13189	4824.11
1141	302.1	17.184	13155.7	14383.8	42812.9	13589.4
1142	303.1	17.184	857.291	4928.82	2380.16	0
1143	362.4	17.184	1004.29	5035.55	1689.66	400.298
1144	581.2	17.185	8424.85	1594.35	5656.94	5868.66
1145	301.1	17.1857	98375.5	106717	244464	217163
1146	580.2	17.1932	0	20462.9	16640.9	0
1147	437.3	17.202	3474.48	0	325.924	258.568
1148	465.3	17.202	5909.49	165.606	373.662	154.402
1149	579.3	17.202	251471	255569	296571	281664
1150	302	17.202	14374.4	0	0	9242.27
1151	373.3	17.219	0	2753.11	0	0
1152	580.3	17.2197	91404.7	88055.7	78084.8	80721.4
1153	395.2	17.2367	521.52	3239.87	3243.25	5105.45
1154	279.1	17.237	10890.4	13274.1	0	8556.8
1155	317.1	17.237	57373.8	54724.5	54719.5	47264.1
1156	342.3	17.237	0	2680.74	1063.25	482.083
1157	318.1	17.2373	12870.4	4307.37	3335.61	3589.55
1158	205.1	17.2451	15436.4	11106.6	5007.03	7815.62
1159	301.2	17.255	174671	181452	49534.7	67586.7
1160	581.3	17.256	7035.25	17385.4	17770.4	14169.4
1161	247.4	17.273	0	3278.48	0	0
1162	466.3	17.273	6878.9	989.057	0	434.277
1163	205.2	17.2733	4191.79	0	12614.2	6091.01
1164	393.2	17.2878	0	0	2997.77	4905.38
1165	512.5	17.29	298.2	2260.9	0	0
1166	247	17.2912	1638.67	0	12641	3298.54
1167	261.1	17.3052	2957.5	0	1187.03	2544.55
1168	279.3	17.309	4963	0	2451.12	0
1169	302.2	17.3565	20199	12180.3	3875.78	19877.6
1170	379.1	17.373	0	1496.59	0	3708.9
1171	303.2	17.415	5293.03	923.703	3262.95	1568.66
1172	392.9	17.4418	0	0	0	3287.3
1173	623.4	17.4508	0	3555.26	5368.94	2863.06
1174	622.4	17.4597	24346.6	1928.61	9390.2	5513.04
1175	349.2	17.468	0	3584.21	404.249	229.06
1176	638.3	17.468	2811.73	6948.41	1796.16	821.279
1177	372.2	17.4695	1647.24	0	7191.29	2856.34
1178	622.3	17.477	1960.67	23843	7486.78	10363
1179	623.3	17.4859	6511.06	4071.49	0	2665.15
1180	413.3	17.5397	1848.94	988.93	3054.97	0
1181	580.3	17.5577	25085.2	24163.7	20554.6	18365.8
1182	580.2	17.5628	0	1396.96	2264.59	10423.9
1183	302	17.575	7170.9	0	0	0
1184	622.2	17.5803	905.22	0	1149.8	5173.99
1185	394	17.598	3232.53	3926.04	4225.83	5757.38
1186	205	17.61	3733.89	1626.84	0	2099.19
1187	317	17.6268	11702.4	8180.59	0	2010.24
1188	302.3	17.663	3678.19	0	0	0
1189	579.3	17.6852	110869	72667.7	89868.6	99712.4
1190	580.4	17.7177	0	0	5119.95	0
1191	152.2	17.7195	1794.13	0	2766.93	6171.28
1192	301.1	17.7327	70249.5	59187.1	52164	14687
1193	464.4	17.7347	1005.48	1643.75	5257.43	2208.23
1194	319.2	17.805	2818.13	3672.32	272.559	0
1195	319.1	17.8767	2023.11	0	3644.02	1530.6
1196	464.3	17.8767	0	970.781	2404.51	310.922
1197	622.4	17.8927	6746.36	10539.6	8003.88	4551.07
1198	579.4	17.894	0	0	559.178	7369.8
1199	369.1	17.9198	2886.38	5011.89	1250.27	1046.78
1200	638.2	17.9275	2764.96	9662.43	0	2127.23
1201	359	17.9463	0	0	0	2891.08
1202	297.3	17.9635	318	4033.85	0	0
1203	111.2	17.9642	1652.88	479.834	1071.5	3471.68
1204	319.3	17.982	6181.26	0	567.494	710.815
1205	425.2	17.9985	15230.1	19300.4	3664.96	3755.7
1206	441.1	17.9992	5592.32	6623.74	1499.09	235.165
1207	373.1	18.0695	894.432	4056.62	1038.02	393.128
1208	297.1	18.0795	3632.85	3340.68	400.89	496.508
1209	394	18.0877	895.266	8400.72	511.319	3288.11
1210	441.2	18.089	5592.56	0	1328.07	1521.06
1211	393.2	18.1055	0	8425.27	0	0
1212	152.1	18.124	2303.68	757.672	0	0
1213	425.3	18.1505	1152.27	2505.53	6214.76	198.603
1214	301.3	18.2482	0	0	4708.81	0
1215	260.9	18.3618	366.36	4249.34	994.284	2642.11
1216	437.3	18.371	772.2	3421.72	253.582	305.17
1217	437.2	18.461	5449.01	1917.45	287.139	394.067
1218	939.4	18.5315	1365.33	4865.98	0	0
1219	441.3	18.5937	19986.6	4886.1	1950.74	11020.7
1220	441.4	18.6103	23118.2	32173.1	16453.7	11234.9
1221	440.4	18.6195	123656	137407	67791.7	71469.9
1222	484.4	18.638	186	4608.55	1292.54	1193.66
1223	359.1	18.674	5887.32	4812.98	10850.2	4406.13
1224	440.3	18.7603	0	0	6945.31	15770.7
1225	371.8	18.886	4958.23	0	0	0
1226	441.5	18.904	3910.25	0	424.845	493.604
1227	379.2	18.9223	1919.36	811.531	3983.48	0
1228	152.1	18.9242	1568.98	8275.92	3843.87	0
1229	397.2	18.957	3961.65	1337.06	0	2875.93
1230	223.1	18.9777	379.26	7450.78	1304.66	1789.19
1231	638.1	19.046	2287.66	0	0	423.678
1232	392.9	19.0647	0	1235.99	6975.33	1023.9
1233	541.5	19.196	9179.23	0	0	20707.6
1234	542.5	19.2048	1340.26	1655.24	980.77	3438.34
1235	540.5	19.2048	0	0	6867.59	24639.7
1236	541.4	19.2145	26199.8	56165.6	9665.62	11016.1
1237	649	19.2423	0	0	3385.64	0
1238	651	19.2423	0	0	9598.25	2272.23
1239	540.4	19.2677	109404	151298	61869	48993.2
1240	542.3	19.2773	1626.95	0	3888.99	0
1241	542.4	19.282	4393.85	9518.48	1942.24	1917.75
1242	152.2	19.282	3475.3	2885.79	0	0
1243	653.1	19.3487	0	0	4284.52	701.895
1244	648.9	19.3667	0	0	3257.83	0
1245	370.9	19.3722	0	6992.83	0	0
1246	301.3	19.383	4613.58	1476.65	606.924	0
1247	540.3	19.418	0	0	0	11279.9
1248	152.1	19.524	3000.86	0	880.15	484.769
1249	111	19.5442	955.06	370.138	504.237	3570.32
1250	578.5	19.5658	637.935	5613.41	0	3007.49
1251	579.4	19.5882	2754.33	5002.93	2628.98	5116.49
1252	600.5	19.613	4781.06	682.547	2069.4	0
1253	579.3	19.6407	3132.41	975.208	3615.76	3268.08
1254	439.4	19.6549	0	3741.02	7498.64	0
1255	578.4	19.6588	17179.3	11296.5	7821.57	11259.3
1256	394.2	19.6698	7444.81	5769.52	3753.34	8741.52
1257	455.4	19.7497	444.064	4389.44	0	0
1258	399.1	19.826	3699.2	0	801.693	0
1259	355.1	19.8315	0	1648.08	1707.05	6438.44
1260	378.4	19.84	684.795	4176	0	0
1261	455.3	19.8415	8990.92	4515.6	5228.23	7353.3
1262	439.3	19.843	44643.3	7367.21	10368.3	9047.24
1263	439.2	19.8583	4948.66	34630	0	5968.51
1264	523.1	19.879	3880.53	0	0	0
1265	523.3	19.8938	0	7869.44	0	0
1266	394.3	19.9122	0	5105.76	3572.75	0
1267	507.3	19.9293	3482.39	11038.9	0	0
1268	508.2	19.9477	0	3903.87	0	0
1269	337.1	19.95	2745.4	456.511	545.388	1359.06
1270	377.2	19.95	90414.5	39097.8	43672.9	48233.2
1271	523.2	19.95	4253.48	1964.22	0	175.372
1272	378.2	19.9631	15172.4	4658.05	4022.85	17122.3
1273	374.4	19.966	1382.72	5906.49	0	1212.43
1274	355.3	19.9866	16876.2	14837.2	10478.9	6812.78
1275	372.2	19.9868	6944.42	6785.33	7491.62	1958.66
1276	355.2	19.9945	4263.05	2155.35	2084.84	10242.1
1277	377.3	19.998	28180.1	70603.1	8860.62	49081.6
1278	356.3	20.003	5558.34	4480.58	4451.78	0
1279	301.1	20.0303	2620.8	4440.2	4679.88	15049.6
1280	337.2	20.0303	0	932.843	166.939	3414.33
1281	439.1	20.0422	0	0	4676.27	1252.04
1282	439.4	20.0553	0	6316.21	0	1914.75
1283	378.3	20.056	6957.64	9447.26	19126.1	8552.08
1284	355.1	20.0737	0	5561.95	1120.58	1272.55
1285	279.2	20.1088	3414.39	329.512	10473.2	18390.1
1286	279.1	20.127	11494.5	0	3655.9	6054.29
1287	279.3	20.1457	2196.95	12497.5	3966.67	1948.29
1288	359	20.1823	0	3701.69	0	0
1289	295.3	20.216	3919.45	2197.06	180.996	169.857
1290	317.3	20.216	9651.81	5537.58	1734.37	4019.73
1291	295.4	20.2178	608.526	3074.97	0	0
1292	302.3	20.2207	758.28	1484.11	3369.74	558.542
1293	317.2	20.2362	8655.58	17387	1694.45	1225.48
1294	409.2	20.2533	3134.42	4148.11	1759.1	0
1295	317	20.3088	0	0	3854.93	267.899
1296	378.4	20.3205	1064.45	0	733.064	4779.69
1297	317.1	20.4044	4221.98	4240	894.785	1806.48
1298	377.3	20.446	34380.8	29907.6	21031.2	15669.5
1299	371.8	20.483	0	0	0	3591.68
1300	372.2	20.5015	932.94	4874.42	0	5727.18
1301	393.9	20.5233	536.07	4204.66	0	0
1302	453.3	20.5598	6414.8	9711.65	1880.98	1268.9
1303	554.4	20.594	5263.11	14979.1	4813.8	10718.2
1304	555.5	20.5953	3668.92	4986.93	826.098	1494.48
1305	453.4	20.6318	274.77	2379.5	774.257	0
1306	555.4	20.6453	4994.37	2890.62	1187.2	206.202
1307	554.5	20.659	3234.61	6707.69	5477.77	0
1308	374.3	20.6823	1302.5	1027.77	0	2510.87
1309	468.4	20.7172	23613.8	31891.4	49525.7	50882.8
1310	469.5	20.7192	16541.6	10835.6	2511.63	10206.6
1311	469.4	20.7521	10586.2	18742	20409.5	12774.6
1312	468.5	20.7577	23197.9	59613.2	11581.5	10732.4
1313	377.1	20.8832	1100.35	2716.78	0	0
1314	261.1	20.8997	1367.9	385.079	1981.28	6011.6
1315	580.3	20.9353	0	0	0	4405.54
1316	411.4	20.9537	0	751.036	0	4109.94
1317	411.2	20.9828	1846.82	204.041	4477.91	0
1318	467.4	21.0075	0	3122.67	0	2373.1
1319	580.5	21.0268	5051.6	12394	1186.72	4387.07
1320	272.9	21.0442	0	0	0	3143.12
1321	353.3	21.0442	50051	13172.7	19444.8	24290.1
1322	394.3	21.0535	0	0	4201.82	0
1323	373.2	21.0535	1636.94	809.079	5173.77	0
1324	369.3	21.0553	12083.8	4385.5	7719.76	11179.3
1325	273.4	21.0613	0	0	908.668	2648.94
1326	497.2	21.066	9243.16	6097.62	3480.89	5591.33
1327	395	21.066	4424.01	0	0	233.052
1328	580.4	21.0666	2059.71	3387.7	5167.57	0
1329	331.3	21.0705	4560.72	4222.91	8440.96	5075.08
1330	468.3	21.0705	1219.99	947.334	7317.18	0
1331	369.2	21.0754	728.533	5437.8	7198.67	1762.36
1332	354.2	21.0975	9219.15	13698.1	4038.89	2343.01
1333	354.4	21.098	0	0	0	2896.61
1334	331.4	21.1157	5095.42	10269.9	0	1865.33
1335	468.2	21.119	3222.16	0	888.534	0
1336	273.3	21.1243	2379.36	907.796	4344.13	1121.83
1337	353.2	21.1335	0	18001.7	18389.2	15418.1
1338	497.3	21.1338	5729.82	4573.9	1471.48	4037.71
1339	282.4	21.1692	0	2278.04	0	0
1340	331.2	21.177	3903.54	0	4997.9	3310.87
1341	481.1	21.208	2691.36	0	0	0
1342	569.4	21.244	23924.8	8626.64	6768.13	6234.68
1343	497.1	21.259	0	4895.08	0	1232.88
1344	379.1	21.2823	736.7	0	3442.59	0
1345	568.5	21.2942	24366.2	91667.7	43315.7	55781.9
1346	395.1	21.3003	6117.59	4723.26	6165.63	816.463
1347	369.1	21.3182	670.091	0	3691.29	2742.74
1348	151.9	21.3487	0	3023.51	667.227	1255.58
1349	497.3	21.3657	1611.41	5578.47	1171.31	1767.6
1350	357.4	21.3838	5066.67	4343.58	267.982	508.946
1351	569.5	21.3933	11001.7	37603.7	8552.99	6072.41
1352	467.3	21.403	4720.08	1398.46	1051.58	2269.21
1353	411.1	21.4055	730.752	1519.15	2943.62	1282.97
1354	568.4	21.4118	49074	51241.4	19615.1	34156.3
1355	365.2	21.4118	25397.7	22746.6	18567.7	21261.9
1356	303.1	21.4233	0	0	24087.4	18473.2
1357	353.1	21.4372	0	7779.31	0	0
1358	341.2	21.438	4034.22	1926.03	1529.34	948.298
1359	354.3	21.4385	1004.99	591.391	1796.62	4212.59
1360	407.3	21.4385	4459.42	3706.54	673.656	3361.82
1361	248.2	21.4413	790.4	0	3454.69	257.24
1362	570.4	21.4552	4565.7	5648.97	1067.17	2657.42
1363	331.1	21.474	3870.93	0	0	0
1364	365.4	21.474	10728.3	1819.67	0	1169.11
1365	366.3	21.474	9256.5	1832.4	1192.89	1285.4
1366	561.4	21.476	4917.1	3591.1	7627.76	3636.86
1367	451.4	21.4821	7911.84	4909.92	0	0
1368	655.5	21.4824	5601.9	2122.32	1518.21	2624.56
1369	688.5	21.484	11213.1	2555.7	4106.46	1269.16
1370	281.3	21.492	98826.7	0	0	0
1371	282.3	21.492	31944.7	45243.3	19893.1	15024.1
1372	369.3	21.492	6407.14	1318.17	2185.07	3715.33
1373	543.4	21.492	8075.73	181.958	0	1269.9
1374	628.4	21.492	4712.76	511.763	865.051	1413.03
1375	320.2	21.5088	1368.46	2241.15	206.871	3839.32
1376	344.2	21.5088	0	606.215	689.701	4153.65
1377	467.4	21.509	2332.51	0	189.981	1378.42
1378	627.5	21.5191	10743.6	6793.27	13108.2	7078.68
1379	569.4	21.5265	6131.45	27474.9	6057.6	5184.6
1380	331.2	21.5265	0	5767.72	0	954.563
1381	304.2	21.5267	37588.4	27160.3	8872.2	24117
1382	325.1	21.5268	0	0	0	11858.2
1383	380.4	21.5268	1935.82	5605.18	3527.39	6586.18
1384	440.5	21.5268	1952.52	449.3	487.775	4064.04
1385	303.2	21.527	156228	96818.6	130171	115518
1386	305.1	21.527	2090.88	3313.15	695.22	2486.3
1387	689.5	21.527	5475.96	2145.02	1396.53	4147.78
1388	599.5	21.5275	10771.9	0	17694.9	1567.26
1389	263.2	21.5278	8747.31	11601	12800.3	2846.61
1390	325.3	21.5285	5029.53	12354.6	12913.1	740.424
1391	353.3	21.5285	21521.4	13071.5	13646.5	14506.6
1392	281.2	21.5358	114545	176652	98840.5	140051
1393	365.3	21.5447	6842.63	20815.4	9361.77	6726.25
1394	656.5	21.5447	1853.92	4433.24	1721.86	859.82
1395	671.5	21.5447	8134.57	9342.84	4051.22	10441.4
1396	599.4	21.5449	15702.5	19634.8	7034.01	27428.1
1397	263.1	21.545	4500.25	448.421	0	5676.63
1398	319.2	21.545	4605.9	3021.52	1996.67	7604.74
1399	621.4	21.545	703.296	414.831	372.402	2235.55
1400	283.2	21.5451	3668.98	5268.19	3209.68	1892.86
1401	759.6	21.5533	2237.63	3139.27	1452.16	6618.69
1402	759.5	21.5535	5268.27	3127.56	970.392	4236.57
1403	283.3	21.5538	1510.5	4347.09	4823.39	406.821
1404	561.5	21.554	29921.6	10556.8	8480.07	16615.6
1405	395.3	21.5547	0	7661.37	5203.66	9124.94
1406	600.4	21.5547	10223.9	1701.81	6425.14	4116.98
1407	396.3	21.563	3593.06	1037.41	537.466	0
1408	627.4	21.563	21249.7	14671.4	3054.65	6527.62
1409	628.5	21.563	6701.31	0	182.609	2319.95
1410	688.4	21.563	4326.47	3820.61	2546.53	748.128
1411	304.3	21.5635	6808.03	1454.01	17342.4	5316.55
1412	325.2	21.571	25989	9333.19	8071.47	9185.21
1413	282.2	21.5715	23245.9	9280.92	16641.7	18268
1414	440.3	21.5725	0	3064	2427.13	0
1415	544.5	21.5798	1227.44	3470.65	0	1222.07
1416	562.5	21.5798	2228.08	7285.67	3179.21	7304.36
1417	600.5	21.5798	0	6693.46	1086.69	3206.34
1418	369	21.5798	511.572	3499.06	0	0
1419	495.2	21.58	7759.92	1009.45	1618.13	1244.87
1420	543.5	21.58	6130.56	2751.94	935.811	6151
1421	413.3	21.5803	10618.7	3440.05	4364.82	4707.91
1422	378.4	21.581	0	3429.84	6015.12	4565.54
1423	687.4	21.5812	22509.6	11574.9	17449.1	29904.5
1424	687.5	21.5978	22507	16689.5	5428.12	4250.58
1425	303.3	21.5978	0	36827.8	8243.56	0
1426	370.9	21.598	5829.12	0	0	0
1427	358.2	21.598	4758.42	678.602	1358.46	1144.78
1428	380.3	21.598	16978.9	18416.4	9161.58	1065.56
1429	672.3	21.598	948.7	0	522.161	2351.08
1430	479.3	21.5986	22761.9	23681.5	6285.74	14893.6
1431	495.3	21.6148	5537.6	6672.08	5421.3	5186.17
1432	483.4	21.616	2152.02	830.003	0	321.15
1433	681.4	21.616	2508.07	3539.39	716.504	7860.75
1434	391.3	21.6167	296.904	0	2430.58	974.119
1435	567.4	21.6167	0	974.455	3144.11	1533.6
1436	379.3	21.6248	112144	130743	58044.2	58543.2
1437	568.3	21.633	9905.7	0	0	0
1438	319.1	21.6343	1431	2967.41	4718.42	607.835
1439	381.2	21.6343	1044.77	0	3517.09	567.945
1440	357.2	21.651	0	1260.54	1007.5	5541.85
1441	357.3	21.651	11931.6	15121.7	5596.8	15132
1442	562.4	21.651	7120.08	0	780.322	1697.22
1443	681.5	21.651	10533.6	9434.37	2083.89	3292.05
1444	479.1	21.6512	0	0	3904.61	0
1445	248	21.6687	3519.12	1292.07	4665.46	2155.44
1446	397.2	21.669	5511.49	3983.82	1159.25	2007.22
1447	676.5	21.669	2834.44	296.656	0	281.191
1448	689.4	21.669	4203.69	1715.31	1918.91	716.754
1449	407.3	21.686	5141	3343.01	1212.08	5670.4
1450	681.6	21.686	1298.69	3152.74	1059.54	0
1451	353	21.6868	0	0	337.969	4078.69
1452	263.3	21.687	4390.21	1939.73	1439.15	1227.87
1453	682.4	21.687	5198.26	1999.95	0	872.244
1454	393.2	21.7038	15832.3	0	8332.11	14456.9
1455	346.2	21.704	2190.47	160.787	530.886	0
1456	407.2	21.7045	2307.15	403.538	6676.87	3043.13
1457	380.2	21.7211	7116.84	0	3730.14	6265.25
1458	263	21.739	0	463.992	2290.46	0
1459	395.2	21.7397	21018	7622.32	4097.45	14558.5
1460	496.2	21.7402	280.8	3419.56	0	192.25
1461	381.1	21.7575	0	974.521	0	2795.31
1462	301	21.7735	0	0	3940.81	3161.55
1463	479.4	21.775	12444.4	795.101	0	3150.56
1464	484.5	21.775	3010.69	634.6	0	0
1465	357.1	21.793	4313.84	1050.68	0	1554.6
1466	379.2	21.793	62068.5	10995.4	22804.7	41624.8
1467	481.2	21.793	5994.91	1807.76	1052.6	1579.31
1468	440.5	21.793	2723.14	0	155.566	0
1469	393.9	21.811	2480.96	0	0	0
1470	281.3	21.811	47905.8	40263.2	6337.18	13828.5
1471	381.3	21.811	3075.55	888.302	814.174	0
1472	599.5	21.827	8139.23	0	0	5183.08
1473	380.1	21.846	6007.66	1164.26	485.292	0
1474	413.1	21.846	2936.2	0	0	340.036
1475	553.3	21.8618	1019.21	3600.8	8793.7	5190.99
1476	599.4	21.8643	741.755	21825.9	4377.79	7880.77
1477	411	21.8785	0	3703.08	6540.37	2837.83
1478	687.6	21.8805	0	0	0	2283.38
1479	281.2	21.8805	53476.7	35844.7	34011.3	70379.9
1480	569.2	21.8812	3875.54	7239.85	790.996	2914.32
1481	376.4	21.882	2344.26	0	0	677.889
1482	569.3	21.8952	928.025	1829.55	3818.12	357.522
1483	482.1	21.8973	1009.62	0	0	2506.6
1484	304.3	21.899	7754.26	0	1346.76	0
1485	248.3	21.8993	0	2801.56	275.963	730.031
1486	480.3	21.9152	1471.28	823.411	483.77	3137.55
1487	553.2	21.917	13443.4	6405.55	5592.22	2835.43
1488	479.2	21.933	781.71	4286.3	5117.87	6173.8
1489	282.3	21.935	15469.5	6714.59	2380.84	7114.01
1490	483.3	21.935	3273.87	986.702	479.171	2469.6
1491	695.4	21.935	4727.47	994.672	1239.63	0
1492	482.3	21.935	11980.5	0	1340.61	0
1493	263.1	21.9478	1083.1	1384.67	2375.23	1600.98
1494	376.2	21.9478	657.067	1640.02	3478.05	1787.33
1495	481.3	21.952	95138.6	65839.8	9909.93	22839.7
1496	554.2	21.9523	0	3851.43	1136.92	775.697
1497	553.1	21.9675	0	2646.3	0	2562.91
1498	482.4	21.9678	6636.14	988.877	5689.85	429.469
1499	381.4	21.97	2917.54	1280.37	0	417.387
1500	495.3	21.9703	3382.46	4520.33	0	613.302
1501	695.3	21.9853	1607.23	920.194	0	3915.64
1502	482.2	21.9957	645.627	16293.6	1176.66	9586.67
1503	481.2	21.9995	6027.49	1830.96	23756.4	8520.38
1504	483.1	22.0055	0	4591.33	0	0
1505	303.2	22.006	60456.5	48998.7	21411.5	25177.4
1506	483.2	22.006	8320.69	1433.11	5306.77	1262.66
1507	377.2	22.006	4583.59	0	11997.6	0
1508	675.4	22.041	3592.96	1671.6	230.696	0
1509	303.3	22.0553	0	8255.05	0	20743
1510	479.3	22.0595	4768.38	13609.6	1808.63	2966.61
1511	479.4	22.1075	465.405	0	299.806	2849.09
1512	411	22.1125	0	2969.35	390.314	403.818
1513	419.3	22.1125	43357.2	12448.6	7346.05	12847
1514	281.1	22.1252	0	0	0	10202.5
1515	420.3	22.1295	1802	3904.97	672.494	0
1516	420.2	22.1472	4705.53	5963.81	162.948	0
1517	394.2	22.154	538.89	529.215	3106.81	0
1518	419.2	22.1603	2062.39	22707.9	5720.35	456.642
1519	481.4	22.1655	2494.85	32474.6	5295.33	5468
1520	435.3	22.1772	3684.38	4143.09	7202.94	5065.74
1521	436.3	22.2185	723.98	4396.68	892.951	659.755
1522	379.4	22.2392	0	2869.74	3043.8	0
1523	435.2	22.2402	1951.96	2102.95	5743.08	930.975
1524	419.1	22.247	0	0	576.68	5981.58
1525	110.9	22.272	2957.29	0	0	0
1526	111.2	22.3073	1845.64	5291.95	1028.98	3575.56
1527	497.4	22.325	4566.48	739.159	0	763.581
1528	281	22.36	2447.81	0	0	559.861
1529	419.4	22.6077	2027.76	2812.13	0	0
1530	281	22.626	2674.38	218.198	1056.61	0
1531	300.9	22.6605	0	2632.62	0	0
1532	582.6	22.6785	0	4935.74	0	0
1533	581.2	22.7145	2743.49	0	0	3180.5
1534	286.3	22.715	3294.78	546.829	0	1807.04
1535	411.2	22.715	10452.1	187.915	0	4584.04
1536	475.3	22.715	3619.59	430.91	888.596	902.675
1537	399.1	22.715	4304.57	0	1018.44	0
1538	285.3	22.7228	29869	11413	6552.92	11234.9
1539	582.5	22.7258	2829.27	14066.9	5909.24	3132.17
1540	455.4	22.7314	4128.06	3228.56	3780.16	8747.12
1541	449.1	22.732	0	1185.67	0	2696.7
1542	727.5	22.734	3141.84	1155.79	5085.77	3186.45
1543	419.5	22.7358	0	0	2370.96	0
1544	412.3	22.7358	3371.38	0	3647.62	2143.93
1545	727.6	22.7492	0	3365.01	0	1215.15
1546	582.4	22.75	18311.3	2506.97	7257.91	4315.35
1547	728.5	22.75	6030.02	1525.94	763.129	2054.91
1548	583.5	22.7662	772.2	8818.2	668.753	370.29
1549	471.3	22.7672	6266.61	3545.55	2704.71	5844.33
1550	559.4	22.7672	886.125	3187.94	3473.79	5829.88
1551	583.4	22.768	5497.92	1381.88	346.444	2636.03
1552	581.3	22.7837	0	0	0	2738.21
1553	419.4	22.784	0	3011.76	0	0
1554	474.4	22.784	1653.6	4118.57	0	0
1555	581.4	22.785	2967.11	2207.05	618.367	427.878
1556	597.3	22.785	6443.25	814.19	183.886	1850.09
1557	727.4	22.787	3244.41	3173.69	2461.54	868.351
1558	412.2	22.802	1354.62	8565.57	1420.71	0
1559	711.6	22.802	3715.16	6335.89	1424.28	375.52
1560	411.3	22.8023	40710	42648.1	18802.9	16023.6
1561	286.2	22.803	3013.58	0	230.017	404.193
1562	359.1	22.803	6073.72	0	0	2552.77
1563	579.5	22.803	2652.67	0	796.288	0
1564	285.2	22.8198	12619.5	14999	3107.43	6796.72
1565	286.4	22.8198	0	3904.29	427.588	550.056
1566	559.3	22.8198	12479.3	15004.7	4332.19	4492.43
1567	560.2	22.8198	0	3216	1076.69	0
1568	449.2	22.821	5374.78	9959.83	3634.97	789.194
1569	474.3	22.8355	2145.61	0	710.939	2557.3
1570	449.4	22.8355	1346.06	0	0	4610.67
1571	433.3	22.838	4120.48	4807.1	0	333.312
1572	455.3	22.8468	13035.6	9145.85	15106.4	7765.07
1573	521.4	22.856	4295.79	1005.76	1667.79	1391.72
1574	711.5	22.856	2884.72	544.052	158.563	872.438
1575	433.2	22.8882	0	0	0	3217.36
1576	582.3	22.892	2735.15	0	0	0
1577	301.1	22.9223	3041.66	0	4118.31	4629.02
1578	301.2	22.9253	5804.26	8461.42	4922.34	0
1579	471.2	22.9432	2115.5	6473.29	1529.07	565.507
1580	579.2	22.945	3135.36	0	1248.08	786.161
1581	393	22.9578	0	5292.51	6170.9	1117.69
1582	712.5	22.98	6039.26	1389.08	1273.09	1910.88
1583	285.4	22.9958	1313.14	4631.92	0	0
1584	301	23.0093	0	3340.7	0	4946.61
1585	463.3	23.0137	206.7	4636.19	194.326	926.433
1586	365.1	23.026	1023.53	552.243	925.113	3566.68
1587	559.4	23.0307	0	3229.26	430.6	535.744
1588	713.3	23.034	2735.99	751.858	0	0
1589	392.9	23.0435	0	0	0	5895.72
1590	413.1	23.1128	658.133	0	3392.03	0
1591	393.2	23.119	0	7585.36	2560.14	0
1592	753.4	23.122	3397.33	0	0	0
1593	547.6	23.14	6586.04	4035.15	577.339	0
1594	566.4	23.158	2754.05	0	0	0
1595	498.2	23.1715	0	2528.1	1351.47	0
1596	565.4	23.175	6668.46	0	493.671	732.214
1597	631.5	23.1983	7577.94	0	3089.73	3714.64
1598	283.3	23.211	80048.2	75688.7	3635.48	32374.9
1599	284.2	23.211	17710.3	0	6910.55	2545.39
1600	327.2	23.211	26088.1	9946.29	3899.63	4929.57
1601	394.2	23.211	3378.14	0	1103.97	0
1602	305.2	23.2158	23186.2	4637.46	16632	10513.7
1603	691.4	23.2158	0	412.836	2796.69	3667.45
1604	379.4	23.2168	7610.04	14038.7	2454.18	9520.02
1605	547.5	23.2229	12699.8	6260.57	491.966	3627.86
1606	565.5	23.2293	9714.51	6607.31	3541.46	6617.05
1607	283.2	23.2345	48943.2	20460.9	50722.8	46439.4
1608	285.4	23.2345	4066.28	5884.83	650.346	9301.45
1609	566.5	23.2353	4004.8	2412.61	470.111	245.955
1610	691.5	23.2418	2347.65	6559.33	3015.47	0
1611	265.2	23.2437	6131.39	5244.07	411.106	1655.48
1612	343.2	23.246	2582.78	1035.83	0	1713.48
1613	548.5	23.2527	7631.45	5122.65	738.481	545.045
1614	284.3	23.2597	10106	33081.2	5786.03	20671.5
1615	285.1	23.2597	748.36	5533.23	0	0
1616	327.3	23.2765	6405.22	9785.6	1204.02	9169.24
1617	631.3	23.2765	1644.24	5457.94	249.639	440.825
1618	521.4	23.2883	3889.49	3720.88	1522.65	651.611
1619	305.3	23.2943	4852.31	12642.6	2576.41	3647.58
1620	691.6	23.299	6803.35	0	0	478.611
1621	395	23.3042	0	837.301	1196.71	2633.66
1622	565.6	23.3237	6022.5	3589.34	0	0
1623	284.1	23.335	9371.79	0	0	0
1624	265.3	23.3647	1258.47	3415.34	188.685	0
1625	524.5	23.3647	165.54	2592.76	0	350.98
1626	394.9	23.3917	375.24	0	0	3380.22
1627	481.3	23.4763	4632.53	1669.44	3188.78	1852.35
1628	305.1	23.5395	0	4906.44	0	1617.38
1629	360.4	23.584	0	0	544.924	2687.84
1630	284.2	23.6273	0	2410.85	858.859	541.274
1631	397.2	23.658	2321.56	5009.43	6050.74	7536.41
1632	365.4	23.672	3649.07	1071.45	816.139	515.049
1633	382.3	23.6754	9783.14	6329.3	4091.62	1253.23
1634	359.3	23.6797	23290.7	19952	11141.3	10180.9
1635	283.4	23.689	7049.87	0	0	0
1636	381.3	23.6979	37860	28029.7	30434.3	31765
1637	421.4	23.7144	1139.15	1462.59	4092.8	5340.22
1638	375.3	23.7403	3306.91	7388.79	12323.3	21724
1639	376.2	23.758	210.133	861.358	3082.25	337.821
1640	481.4	23.778	6889.48	1812.96	2200.83	2742.32
1641	421.2	23.796	10831.6	0	3266.89	1596.52
1642	421.3	23.8195	10185	17421.3	2780.85	1268.31
1643	397.3	23.8372	1077.74	4010.79	3754.53	470.454
1644	437.2	23.8892	188.505	4814.08	1173.4	2047.64
1645	375.1	23.9013	0	0	0	5721.18
1646	373.2	23.9068	369.874	2854.2	989.645	1991.62
1647	395	23.938	2734.08	3246.95	0	1798.87
1648	413.1	23.9895	0	903.181	0	3306.8
1649	283.1	23.991	3257.76	862.035	292.929	721.884
1650	479.2	24.026	3228.76	1526.74	501.83	0
1651	539.3	24.097	27917.4	19143.3	12803.5	17398
1652	479.3	24.0972	1809.42	4363.3	493.855	0
1653	541.3	24.1318	4333.28	0	967.678	3602.94
1654	524.3	24.1323	30157.7	31947.5	3487.84	8346.62
1655	523.3	24.1325	49144	112982	20780.4	35390.8
1656	540.3	24.1583	7843.35	8603.07	2383.84	3095.73
1657	392.9	24.196	0	6565.52	5448.94	0
1658	110.9	24.2018	0	2562.91	0	0
1659	525.2	24.2193	1299.3	3310.8	0	0
1660	375.3	24.239	3989.7	499.426	573.627	2090.77
1661	523.2	24.2392	0	0	2841.17	10924.4
1662	336.2	24.2573	0	0	2174.52	3991
1663	396.1	24.2753	658.26	263.898	0	5520.28
1664	539.2	24.2753	4080.01	0	0	5880.86
1665	879.7	24.2857	0	0	3756.16	0
1666	512.9	24.3107	0	361.835	644.007	2560.48
1667	379.4	24.327	9605.04	1727.68	1876.05	0
1668	396.4	24.327	6117.36	248.746	1383.1	0
1669	336.4	24.3287	0	668.423	0	2869.72
1670	469.4	24.3417	0	0	4154.3	0
1671	492.4	24.3607	0	19013.8	13933.7	8907.18
1672	881.6	24.3607	769.995	656.186	3067.2	485.629
1673	378.5	24.363	3985.34	194.087	710.019	0
1674	395.3	24.364	80930	30006.8	32666.4	45400.7
1675	440.4	24.364	410.025	0	1138.5	2208.62
1676	539.4	24.364	9010	12141.9	0	5986.14
1677	881.4	24.382	0	0	0	5107.74
1678	540.4	24.382	1147.01	702.614	3389.38	4877.87
1679	379.3	24.3883	23829.6	23899.6	16574.8	15397.9
1680	451.2	24.3913	1658.67	3876.3	0	0
1681	380.3	24.3921	2399.44	6040.39	2635.82	1714.54
1682	396.3	24.3953	13976	8003.71	16835.5	7512.51
1683	411.3	24.3975	7925.73	0	5929.92	2512.65
1684	879.6	24.3988	16242.4	8062.05	20081.5	25544.7
1685	469.3	24.4082	1127.69	2037.54	3538.28	4941.72
1686	880.5	24.4092	2345.6	0	8321.91	7557.98
1687	493.4	24.4127	4236.85	5142.85	0	4910.4
1688	492.3	24.416	23434	4026.41	4443.52	20135.3
1689	524.1	24.416	2256.67	0	356.367	0
1690	429.4	24.4163	5544.39	4922.18	24339.5	0
1691	467.3	24.4347	45681.6	41976.9	78734.6	61276.2
1692	880.6	24.4347	10710.7	4277.04	11771.7	10278.8
1693	468.3	24.4348	16362.4	2603.34	9115.23	7962.93
1694	430.3	24.4356	8680.34	1032.03	6006.71	4657.64
1695	468.2	24.4378	4165.34	14779.4	14214.6	21161.4
1696	377.3	24.4425	28569.4	24398.1	60611.7	48698.2
1697	395.4	24.4425	0	14642.5	6785.18	8036.76
1698	540.3	24.4528	6248.54	5805.31	4089.87	2533.19
1699	430.2	24.4582	959.064	4014.41	1072.17	3535.49
1700	536.3	24.4614	334.53	1215.65	5439.44	4286.93
1701	451.3	24.4717	2709.16	2269.54	418.826	5246.92
1702	879.5	24.487	4757.28	966.248	1073.86	0
1703	429.3	24.4894	29459	34127.1	33613.2	25901.5
1704	336.3	24.4903	6767.82	3410.26	5998.77	474.125
1705	492.3	24.508	4508.03	1718.99	4901.67	7366.54
1706	469.2	24.5081	8725.01	5662.6	1259.41	405.82
1707	378.4	24.5094	6720.84	12813.9	5511.37	3469.34
1708	493.2	24.5234	3639.76	366.522	484.957	4400.26
1709	467.2	24.54	18529.9	5118.88	0	26216.5
1710	546.3	24.558	8571.85	2138.26	0	164.776
1711	523.4	24.5622	6516.74	10595.8	0	1540.22
1712	372.2	24.5822	1111.75	0	3909.61	882.374
1713	411.2	24.682	2727.38	795.131	1184.91	2792.24
1714	429.4	24.6855	2639.07	2230.04	1219.01	8421.87
1715	379.1	24.7066	1660.74	0	3580.77	2430.91
1716	396.4	24.712	0	997.684	2567.14	1939.28
1717	110.9	24.7572	0	0	0	2518.34
1718	393.2	24.7675	0	0	6191.2	0
1719	492.4	24.7863	0	6647.14	10352.6	7432.41
1720	379.2	24.806	7692.97	2820.64	430.313	1706.23
1721	394.2	24.8108	1469.95	348.942	0	4180.49
1722	429.1	24.8292	0	0	0	4774.35
1723	465.4	24.851	3749.32	5112	194.79	0
1724	375.4	24.93	3112.05	0	0	0
1725	372.1	24.9352	12228.3	6717.12	7148.78	9370.33
1726	430.4	24.9352	176.434	0	3184.35	1022.28
1727	371	25.0213	3335.25	13969.7	0	2611.68
1728	467.2	25.0213	1967.35	3777.07	5728.74	0
1729	467.1	25.0643	0	0	0	2943.41
1730	396.1	25.072	2282.02	0	371.472	1129.6
1731	537.4	25.1053	0	4217.53	2415.38	0
1732	538.2	25.107	2751.17	1003.07	0	0
1733	301.1	25.125	3451.36	0	0	394.374
1734	633.1	25.125	6436.32	2382.45	0	0
1735	379.2	25.1545	10091.1	4043.9	2801.58	7874.1
1736	537.3	25.1552	12429.7	9217.47	3355.86	15249.7
1737	380.3	25.1562	1406.48	4661.33	0	175.835
1738	537.2	25.1582	6516.8	2417	6531.73	0
1739	379.3	25.1733	1509.11	5333.86	3024.48	0
1740	395.1	25.1733	1057.54	7052.43	0	3595.99
1741	538.4	25.1733	1429.23	3509.09	564.598	0
1742	553.3	25.178	5076.57	7090.24	3318.69	2198.3
1743	634.1	25.178	2960	191.298	0	0
1744	538.3	25.184	2208	4222.86	4376.86	4081.27
1745	313.2	25.196	5090.12	798.918	430.977	774.069
1746	111.2	25.2275	1257.36	647.783	731.205	4051.28
1747	329.2	25.2275	179.623	1102.24	657.973	3887.37
1748	409.1	25.249	4510.77	891.094	263.998	612.5
1749	393.8	25.292	0	3537.19	0	0
1750	379.4	25.324	0	3152.81	4410.86	430.556
1751	393	25.3745	2060.8	0	1464.29	15593.6
1752	537.4	25.3947	0	4129.13	0	1248.79
1753	359.3	25.5038	64964.8	36512.2	33750.3	65269.5
1754	354.4	25.5228	0	0	0	2136.29
1755	373	25.5595	1581.32	751.35	1086.52	6977.45
1756	528.4	25.5648	3549.35	5910.75	0	0
1757	528.3	25.568	8937.92	344.375	0	185.091
1758	568.4	25.604	4476.78	0	0	0
1759	414.3	25.616	2059.22	6680.7	1165.13	976.897
1760	413.3	25.639	16169.4	18438.4	2939.06	9606.3
1761	429.1	25.6498	924	4220.08	832.623	1811.6
1762	391.3	25.6508	4478.97	5179.91	4409	6599.99
1763	413.2	25.7022	19882.8	23255.1	5801.63	6699.2
1764	413.1	25.7263	0	0	5611.58	790.348
1765	414.2	25.728	2612.94	1853.53	0	1201.59
1766	495.3	25.7468	4089.05	7273.15	2312.21	2600.1
1767	437.3	25.7662	1455.37	3496.43	988.434	6533.77
1768	377.4	25.77	2254.62	8614.94	2882.79	6239.48
1769	459.3	25.805	0	5444.28	665.575	634.591
1770	578.6	25.869	2969.04	0	0	0
1771	495.4	25.869	4087.55	1831.55	0	0
1772	459.4	25.8742	566.58	2307.95	0	0
1773	375.3	25.924	7658.95	4394.75	5603.72	2609.86
1774	378.4	25.924	344.964	0	4658.73	3411.03
1775	513.6	25.938	0	304.931	702.051	3419.72
1776	578.3	25.938	1173.63	364.735	0	3215.24
1777	512.5	25.9437	16451.2	18380.8	11877.8	15638.4
1778	437.4	25.9517	0	5033.9	4454.51	1522.82
1779	370.9	25.9943	5046.3	7510.1	4077.42	0
1780	301	26.0303	673.628	594.78	2737.07	0
1781	361.2	26.064	10818.8	0	699.372	0
1782	495.3	26.118	2982.09	917.103	717.235	2128.37
1783	376.3	26.1182	4138.77	5073.02	9160.04	927.174
1784	675.7	26.135	9854.44	1159.62	4464.76	1082.87
1785	361.3	26.1358	14056.9	19711	35946.6	6611.62
1786	339.3	26.1528	92152	81256.5	84935.9	17447.2
1787	340.4	26.155	9588.8	2022.99	2036.18	7269.69
1788	339.4	26.1555	38228.5	32099.3	29415	104640
1789	413.3	26.1614	1421.46	12131.5	4633.1	2378.69
1790	360.3	26.162	163500	137631	146800	154164
1791	360.4	26.175	0	0	0	36635.8
1792	361.4	26.175	5482.22	3036.83	0	14235.2
1793	338.3	26.188	298390	198418	138699	392695
1794	338.4	26.1892	183361	169400	300325	101186
1795	675.6	26.1958	1672.68	0	3200.29	5458.58
1796	513.6	26.2063	0	0	3121.76	0
1797	413.1	26.224	3438.76	646.895	415.91	2218.61
1798	340.3	26.2243	3627.89	9214.97	2107.49	2701.45
1799	376.1	26.2313	5666.09	0	4297.24	2188.52
1800	301.1	26.2605	1234.78	2961.12	0	0
1801	340.2	26.295	4625.01	0	2801.15	0
1802	376.2	26.2957	3144.12	15216.7	750.659	7286.25
1803	513.4	26.2957	4756.29	5570.3	14933.8	3372.15
1804	394.2	26.3138	0	4444.87	0	0
1805	413.2	26.319	607.692	1763.39	1409.51	2683.88
1806	511.4	26.33	4144.91	1747.47	0	0
1807	511.3	26.3402	2773.94	10262.3	3190.91	3101.28
1808	512.5	26.349	38636.7	52053.7	69638.4	33927.7
1809	513.5	26.3852	4563.41	4973.56	1020.22	7686.53
1810	534.5	26.401	13651	7702.14	8135.96	9878.16
1811	521.2	26.4023	552.735	11103.7	1389.23	1350.86
1812	534.4	26.4028	2148.11	615.121	6582.27	4968.04
1813	512.6	26.4243	6858.6	4562.58	0	14604.7
1814	562.3	26.437	4971.28	254.275	3044.96	923.295
1815	361.2	26.4371	6173.38	1596.15	4523.96	0
1816	521.1	26.4877	0	745.813	0	3066.34
1817	111.1	26.492	1370.65	6398.16	4032.19	5367.5
1818	499.2	26.492	757.56	2540.23	381.146	0
1819	376.4	26.4968	771.47	6091.23	624.684	5022.28
1820	521.4	26.5103	1619.92	0	4834.25	0
1821	521.3	26.543	14382.5	4413.34	1872.16	4158.58
1822	513.6	26.5635	0	2616.08	557.928	852.654
1823	360.4	26.5815	0	9774.26	0	0
1824	393.9	26.6168	1936.17	3460.32	465.002	2175.03
1825	513.5	26.6247	8596.39	8715.97	9281.11	18752.6
1826	512.3	26.6883	0	4905.09	0	0
1827	420.2	26.6883	0	4550.09	1123.29	371.408
1828	419.2	26.6956	2760.6	3005.35	0	1141.54
1829	419.4	26.6958	8810.02	11491.3	6195.79	0
1830	535.3	26.791	4979.3	3664.85	1416.85	2097.64
1831	371	26.809	8317.92	6662.2	1295.64	5784.33
1832	512.4	26.812	3221.14	3096.52	0	4995.43
1833	521.4	26.8133	447.944	4149.49	301.236	1260.07
1834	419.3	26.8232	11065.4	3215.95	442.089	7503.99
1835	723.1	27.1717	1937.07	4964.85	0	0
1836	399.4	27.5238	371	487.4	3387.76	433.293
1837	532.3	27.763	0	2684.95	0	0
1838	378.4	27.784	14021.2	0	2055.94	1168.13
1839	532.4	27.8005	8012.79	4139.83	0	0
1840	377.3	27.801	63037.5	25970.1	11819.2	6755.87
1841	377.2	27.8761	0	11416.9	6646.66	0
1842	394.9	27.9067	0	2536.33	2845.73	6734.18
1843	533.4	27.908	3193.65	1830.36	0	0
1844	366.2	28.1367	0	0	5666.86	0
1845	340.3	28.1517	0	0	2709.16	0
1846	378.1	28.1713	346.491	0	0	3685.99
1847	366.5	28.1837	0	0	6159.66	0
1848	378.3	28.1837	25487	22052.2	17180.9	7143.2
1849	371	28.2147	0	0	7446.38	0
1850	526.4	28.2468	10061.1	5696.01	10715.5	0
1851	497.2	28.2622	0	0	3770.42	0
1852	482.2	28.2783	0	0	3978.67	0
1853	481.3	28.2783	21319.9	3836.74	12986.1	0
1854	379.3	28.2945	3396.86	2398.88	14282.1	1468.52
1855	526.5	28.326	0	203.12	5878.4	0
1856	372.3	28.346	389.02	0	0	2766.6
1857	366.3	28.351	11149.4	2224.1	351.647	0
1858	513.4	28.457	3386.12	1447.31	0	0
1859	395.2	28.472	0	3676.26	5142.2	0
1860	380.4	28.475	3351.19	0	160.868	0
1861	497.1	28.475	5083.76	169.48	0	0
1862	481.2	28.4843	0	4968.22	0	0
1863	366.4	28.5065	3111.66	4138.77	270.734	0
1864	379.1	28.51	5255.48	0	0	0
1865	481.3	28.51	21089.8	3840.53	698.899	0
1866	379.2	28.521	0	9865.98	1004.4	0
1867	548.3	28.5606	3431.22	3183.88	0	0
1868	526.4	28.5697	141892	70633.7	1091.42	0
1869	482.3	28.5752	875.26	2990.88	0	0
1870	527.4	28.5871	40966.1	44251.4	0	0
1871	449.3	28.5935	0	2520.68	0	0
1872	481.4	28.5935	0	6954.27	0	0
1873	540.5	28.6052	2370.96	4351.34	819.575	0
1874	497.3	28.6293	2244.25	3851.79	321.733	0
1875	524.4	28.6498	23017.5	25779.4	0	0
1876	528.4	28.652	5677.45	1958.25	0	0
1877	546.4	28.659	47260.9	33777.1	166.724	0
1878	379.3	28.666	7722.52	9982.57	13533.2	8767.37
1879	548.4	28.666	1675.11	3984.65	0	0
1880	547.4	28.6678	14364.1	8718.62	711.863	0
1881	525.5	28.67	2969.04	2360.33	0	0
1882	110.9	28.6865	0	0	0	2683.88
1883	547.2	28.7387	0	3428.28	0	0
1884	354	28.776	3491.64	1119.26	0	0
1885	547.5	28.794	3703.37	0	0	0
1886	527.5	28.8103	3921.94	9298.94	0	0
1887	354.1	28.8243	1230.34	0	3572.2	0
1888	375.1	28.8597	1124.64	0	2910.3	1321.74
1889	377.3	28.865	24477.9	15648.6	7514.58	3542.53
1890	378.3	28.918	16211.5	3727.24	2016.31	2394.88
1891	377.4	28.953	20483	20426.6	3638.84	7866.21
1892	540.4	28.971	230.64	0	0	3638.16
1893	546.3	28.989	3313.73	0	0	0
1894	481.2	28.99	518.34	0	0	9418.67
1895	375	29.018	3034.46	1565.51	6891.65	542.935
1896	379.3	29.0498	277.2	1094.01	0	4387.34
1897	379.2	29.1842	877.212	0	0	3949.46
1898	526.3	29.2472	728.057	2751.61	0	456.833
1899	372.1	29.2955	3699.17	279.092	1416.93	3314.62
1900	111	29.361	4452.31	1855.83	4190.15	0
1901	372	29.4035	1381.71	462.552	487.805	3349.47
1902	354.4	29.4078	2186.44	2233.25	4238.89	0
1903	395.2	29.4078	570.84	0	3272.35	0
1904	393	29.4293	0	19032.6	13984.2	0
1905	378.3	29.4572	2497.38	2308.23	392.937	4234.42
1906	372	29.822	2787.8	0	0	333.213
1907	378.5	29.8543	0	0	3523.37	0
1908	355.1	29.857	5055.16	1859.85	2448.34	1233.97
1909	110.9	29.928	2243.87	0	0	0
1910	111	30.0548	3100.5	4274.97	2943.91	11863.3
1911	377.4	30.1615	1417.22	8027.31	0	11155.3
1912	378.1	30.247	2361.68	0	0	0
1913	360.3	30.407	16828.8	3151.76	5223.86	4973.1
1914	378.4	30.602	11308.2	394.1	847.671	848.504
1915	377.2	30.619	24885.8	5208.97	12161.3	3070.51
1916	375.1	30.637	4887.02	3405.24	2888.45	1039.03
1917	382.3	30.6818	2086.83	2717.97	0	5044.43
1918	359.2	30.73	50716.9	235932	99832.4	363788
1919	375.3	30.7593	0	3205.07	1025.2	0
1920	379.4	30.832	6888.42	0	565.518	0
1921	377.2	30.927	0	20095	0	14763.9
1922	377.3	30.9383	435576	182003	46841	21720.3
1923	378.3	30.957	126905	31426.6	8052.2	3028.96
1924	382.2	31.0072	0	2597.38	0	1769.87
1925	359.2	31.1993	10655.1	92569.8	125863	100327
1926	382.3	31.2215	14488.9	1651.83	14088.9	9002.91
1927	377.3	31.222	92388.9	82121.3	10639.5	5986.48
1928	378.2	31.24	21843.2	4876.31	380.154	517.731
1929	354.3	31.3388	43517.8	31652.3	60114.5	79923.4
1930	377.1	31.346	4154.71	0	1496.89	0
1931	382.4	31.4557	0	0	3971.82	703.244
1932	359.2	31.4612	10293.9	65785.7	104213	123717
1933	393.2	31.4803	0	669.653	4653.07	6100.32
1934	359.1	31.6917	4019.73	0	15461.4	0
1935	360.2	36.4422	0	7673.86	0	0
1936	217.1	36.4625	0	4209.22	0	0
1937	347.2	36.4625	0	2437.25	0	0
1938	359.3	36.4625	0	20167.7	0	0
1939	261.2	36.5023	0	4586.21	0	0
1940	363.1	36.5023	0	3196.01	0	0
1941	393.1	36.5435	1410.71	24122.6	0	0
1942	196	36.6047	0	2687.1	0	0
1943	362.1	36.6047	0	3774.36	0	0
1944	395	36.6047	0	2604.85	0	0
1945	175.1	36.6255	0	2244.94	0	0
1946	246.1	36.6255	0	4005	0	0
1947	305.1	36.6388	7672.28	5195.06	0	0
1948	262.1	36.6453	0	2365.62	0	0
1949	393.9	36.6453	0	2881.41	0	0
1950	261.1	36.6453	1918.46	49769.3	0	0
1951	382.2	36.663	3309.73	0	0	0
1952	186.9	36.6663	0	5238.82	0	0
1953	188.1	36.6663	0	3244.58	0	0
1954	360	36.6875	0	2295.13	0	0
1955	360.3	36.699	5115.26	0	0	0
1956	382.3	36.716	3630.59	0	0	0
1957	263.1	36.734	2967	0	0	0
1958	359.2	36.734	41134.6	5242.83	0	0
1959	259.2	36.7498	1602.45	7249.45	172.529	2396.07
1960	226.9	36.77	2529.02	404.989	0	0
1961	189	36.7712	0	3871.64	0	0
1962	152.2	36.7743	8847.82	15804.7	0	0
1963	394.1	36.787	5834.24	1737.33	0	0
1964	372.1	36.7913	1092.86	7692.22	0	0
1965	377.2	36.84	4027.99	0	0	0
1966	375	36.84	6971.07	722.919	0	0
1967	231.9	36.858	4602.01	0	0	0
1968	245	36.858	12220.7	1240.13	0	0
1969	196.1	36.876	4966.09	2717.29	0	0
1970	161.2	36.894	2859.52	936.452	0	0
1971	187	36.894	8099.32	544.231	0	0
1972	262.1	36.947	3383.53	218.318	0	0
1973	232.1	37	4764.35	259.595	0	0
1974	217.1	37.0063	477.312	0	5629.66	167.03
1975	152.1	37.011	19928.5	4284.96	16399.9	0
1976	382.3	37.0172	0	0	4001.8	134.731
1977	349.1	37.0275	12508.1	217.57	4624.78	14015.5
1978	431	37.0385	0	0	2678.62	0
1979	363	37.0385	519.72	0	3983.1	0
1980	111	37.0598	0	1881.42	3953.65	0
1981	359.2	37.0675	22853.9	7977.22	34735.2	93871.4
1982	259.1	37.0708	0	855.432	2908.64	0
1983	375	37.082	1173.73	258.03	4269.24	411.657
1984	144.1	37.082	1137.42	0	4966.73	0
1985	332.9	37.093	0	0	2257.75	0
1986	361.9	37.093	0	0	3937.31	0
1987	360.3	37.0965	0	292.94	622.37	5474.57
1988	261.1	37.1035	43556.5	14255	59929.5	29593.6
1989	349	37.1035	659.32	0	6279.83	0
1990	137.4	37.1147	0	0	3666.79	0
1991	382.2	37.1243	0	0	0	4103.26
1992	349.2	37.1243	0	597.891	888.023	5702.03
1993	259	37.1258	6332.89	407.131	3348.54	4512.35
1994	393.1	37.1373	6337.81	2776.25	2533.3	12534
1995	245.1	37.1422	1629.36	1673.34	12661.5	8997.12
1996	391	37.1504	0	0	5312.72	5925.4
1997	430.9	37.1512	0	0	0	2788.86
[truncated: 73 more rows]

## Sheet: A. fumigatus-Ibrutinib
Supplementary Table 6 - Mass spectrometry data from metabolome analysis of pathogenic fungi treated with drugs.
Total metabolic ions								Inhibited metabolic ions (1)						Inhibited metabolic ions (2)
	M/Z	Re time	DMSO-1	DMSO-2	Ibrutinib-1	Ibrutinib-2			M/Z	Re time	DMSO-1	Ibrutinib-1			M/Z	Re time	DMSO-2	Ibrutinib-2
1	303.2	0.097	0	0	0	2683.8		1	338.4	26.1479	183361	0		1	368.3	8.48267	100392	0
2	261.2	0.209	3250.71	1000.64	0	0		2	368.3	8.48267	74726.8	0		2	161.2	35.104	67273	0
3	261	0.301167	2709.7	3707.27	1799.85	3617.17		3	261.1	35.104	43556.5	0		3	887.2	7.415	49911.9	0
4	152	0.311	482.706	0	4605.06	0		4	359.2	34.702	41134.6	0		4	393.9	35.4257	49769.3	0
5	394.1	0.505	1352.87	5270.71	3189.54	2489.3		5	369.3	8.49	36200.6	0		5	759.6	21.556	36827.8	0
6	365	0.5055	5533.07	9224.47	16898.4	0		6	261.1	35.4257	35054.5	0		6	481.4	22.1112	32474.6	0
7	394.9	0.521333	2388.05	0	0	0		7	482.3	15.4403	22383.1	0		7	309.3	8.836	29668.1	0
8	104	0.521333	2851.61	754.863	0	0		8	396.2	9.66467	22038	0		8	305.1	35.2767	24122.6	0
9	381.1	0.523167	6125.32	2598.19	641.448	8967.52		9	481.3	28.2937	21089.8	0		9	263.1	34.702	23397.6	0
10	111.2	0.523167	464.116	0	0	3507.31		10	478.3	15.1452	21071.7	0		10	598.2	13.3423	20562.2	0
11	269.1	0.541	0	0	4186.56	0		11	377.4	28.7628	20483	0		11	318.4	12.3175	20364.3	0
12	381	0.541167	5689.9	7548.62	1584.5	0		12	152.1	35.1925	19928.5	0		12	217.1	35.1572	20167.7	0
13	219	0.557333	3298.3	1066.09	553.8	304.299		13	393.1	35.2767	17585.6	0		13	607.2	12.0743	17545.1	0
14	269.2	0.558167	0	3198.94	0	0		14	426	9.62767	16008.8	0		14	273.8	7.377	16335	0
15	206	0.558167	0	2786.41	2045.47	2188.5		15	622.1	12.0743	14680.4	0		15	152.2	35.5175	15804.7	0
16	101.1	0.558333	0	898.56	605.088	3569.02		16	302	17.2357	14374.4	0		16	570.3	12.6865	15647.4	0
17	203.1	0.558333	5940.61	4566.03	7462.45	8103.11		17	547.4	28.523	14364.1	0		17	482.3	14.9053	14824.9	0
18	268.7	0.576167	0	2391.36	0	0		18	359.3	35.1572	13333.4	0		18	395.4	24.5021	14642.5	0
19	535	0.576167	0	2900.54	1362.1	739.765		19	349.1	34.9678	12508.1	0		19	348	7.34283	14111.2	0
20	365.1	0.576333	63105.5	41006.4	5765.91	51021.9		20	306.1	5.36208	12357.8	0		20	371	25.0175	13969.7	0
21	366.2	0.594	0	0	2437.18	0		21	245	35.0132	12220.7	0		21	431.2	5.55692	13598.2	0
22	291	0.594	621.043	707.852	3786.96	1718.94		22	359.1	9.867	11850.2	0		22	418.1	8.25483	13364.4	0
23	205.1	0.594083	4340.25	8280.38	7145.09	1144.69		23	470.3	15.0547	11819	0		23	470.2	7.3945	12832.8	0
24	366	0.594167	1227	4841.67	1401.84	2350.29		24	378.4	29.7588	11308.2	0		24	371.2	17.0583	12727.4	0
25	140	0.594167	1099.85	3052.53	0	0		25	361.2	26.0617	10818.8	0		25	279.3	20.147	12497.5	0
26	450.2	0.594167	0	6579.94	908.42	0		26	365.4	21.6382	10728.3	0		26	539.4	24.2372	12141.9	0
27	450	0.594333	0	371.044	641.13	6264.6		27	411.2	22.7057	10452.1	0		27	567.3	12.1397	12046.2	0
28	258	0.594333	0	0	168.27	2870.48		28	575.2	13.6548	10287.3	0		28	512.3	16.8055	11225.1	0
29	101	0.5945	8346.26	3325.82	10102.8	745.518		29	370.9	16.1888	9686.28	0		29	471.2	7.36033	10807.6	0
30	395	0.5945	3864.73	2121.96	2184.88	307.213		30	325.3	6.50883	9672.5	0		30	359.2	29.7093	10581.9	0
31	450.1	0.5945	10293.3	1798.18	398.933	2354.97		31	470.2	7.3945	9340.8	0		31	331.4	21.0925	10269.9	0
32	269	0.612	862.056	963.014	4091.73	1941.44		32	416.1	8.67017	9292.98	0		32	360.4	26.5717	9774.26	0
33	280.1	0.612	0	5170.13	4880	5813.31		33	542.1	10.3707	9221.73	0		33	370.9	1.23258	9497.72	0
34	535.1	0.612	2863.06	210.078	0	1127.1		34	539.4	24.5487	9010	0		34	497.3	11.496	9445.66	0
35	220	0.6295	2507.11	1711.94	2071.96	4381.12		35	441.1	15.252	8917.39	0		35	365	0.5055	9224.47	0
36	244.1	0.6295	2101.46	258.774	3164.32	8054.6		36	152.2	34.9678	8847.82	0		36	377.3	29.8657	9060.98	0
37	206.1	0.63	425.942	1253.8	4111.74	1884.49		37	371	25.0175	8819.65	0		37	152.1	35.1925	9019.37	0
38	322.1	0.63	0	0	3424.95	440.187		38	587.3	12.056	8461.41	0		38	547.4	28.523	8718.62	0
39	374.9	0.63	355.184	0	2636.22	0		39	187	35.104	8099.32	0		39	888.3	7.30767	8700.48	0
40	113.1	0.647083	0	4547.97	8681.18	6172.96		40	543.4	21.6448	8075.73	0		40	412.2	22.7528	8565.57	0
41	124.1	0.647167	0	8920.87	7844.76	6791.29		41	478.8	15.0547	7997.92	0		41	309.1	9.53717	8475.76	0
42	375.1	0.647167	541.926	5561.6	484.575	498.916		42	451.4	21.6702	7911.84	0		42	446.1	9.55567	8454.54	0
43	280	0.647333	8950.89	2063.47	1457.98	3698.11		43	370.9	36.0855	7844.46	0		43	917.3	7.5675	8349.81	0
44	334.9	0.6475	1671.67	0	622.22	2929		44	359.3	8.16767	7702.69	0		44	566.2	12.0863	8271.15	0
45	205	0.648	2989.38	0	3054.48	0		45	379.2	24.8603	7692.97	0		45	427.2	9.55708	8098.26	0
46	206.2	0.665167	0	2638.62	0	697.592		46	305.1	34.702	7672.28	0		46	325.1	6.58567	7782.52	0
47	204.9	0.665667	0	0	0	2713.79		47	548.5	23.2458	7631.45	0		47	353.1	21.4012	7779.31	0
48	113	0.666333	7053.49	753.008	0	1589.18		48	861.3	9.64567	7613.73	0		48	372.1	35.6368	7692.22	0
49	267	0.683	688.231	0	8482.66	6282.72		49	416.1	4.21167	7423.12	0		49	360.2	35.127	7673.86	0
50	290.9	0.683	0	1927.34	2888.94	757.748		50	430.3	5.73367	7359.22	0		50	393.2	23.077	7585.36	0
51	244.2	0.684833	3112.16	0	1852.88	0		51	454.1	13.6248	7221.78	0		51	654.4	15.305	7569.46	0
52	372.7	0.701	0	0	3096.26	0		52	476.3	9.9095	7215.41	0		52	381	0.541167	7548.62	0
53	152	0.736333	0	2792.7	171.72	0		53	318.4	14.4557	7184.68	0		53	507	9.71917	7516.53	0
54	291.1	0.772	923.898	543.678	4329.02	1413.24		54	302	17.7003	7170.9	0		54	370.9	25.9973	7510.1	0
55	307.1	0.772	0	0	1122.91	6372.91		55	452.1	15.8741	7141.89	0		55	472.1	7.36033	7361.07	0
56	152	1.055	3308.83	413.813	3900.69	3767.53		56	535.2	13.6347	7127.17	0		56	569.2	21.8897	7239.85	0
57	370.9	1.23258	0	9497.72	8209.72	0		57	113	0.666333	7053.49	0		57	379.3	25.1717	7052.43	0
58	372	1.24667	4410.67	698.124	0	2609.06		58	283.4	23.7495	7049.87	0		58	359.4	12.5842	6820.04	0
59	372.2	1.268	639.261	4136.41	3621.02	0		59	555.1	9.5225	7034.89	0		59	998.2	13.3494	6790.08	0
60	359.4	1.41267	0	0	0	3078.24		60	955.4	15.1438	7007.83	0		60	587.2	12.1043	6769.19	0
61	393.2	1.42617	2586.7	0	0	0		61	303.3	22.1612	6997.68	0		61	654.4	15.0608	6735.06	0
62	392.8	1.498	2248.22	0	0	0		62	375	34.9678	6971.07	0		62	453.4	16.014	6703.84	0
63	152.2	1.643	1974.62	3731.74	0	5107.16		63	372.2	20.2313	6944.42	0		63	441.1	18.0148	6623.74	0
64	152.1	1.89067	8801.75	1606.26	2457.58	1471.79		64	481.1	15.9608	6933.46	0		64	366	0.594167	6579.94	0
65	359.4	2.155	0	0	0	3632.27		65	379.4	29.8582	6888.42	0		65	371.2	38.275	6569.87	0
66	393.9	2.172	2127.75	0	3047.5	0		66	304.3	21.8538	6808.03	0		66	392.9	11.693	6536.16	0
67	392.8	2.385	0	0	3524.4	0		67	691.6	23.3657	6803.35	0		67	382.3	23.724	6329.3	0
68	370.9	2.41717	0	0	0	4761.14		68	571.3	12.276	6734.36	0		68	439.4	20.0577	6316.21	0
69	393.2	2.509	0	0	6238.97	0		69	547.6	23.1577	6586.04	0		69	371.9	11.5323	6230.47	0
70	360.2	2.544	0	396.396	3349.43	673.149		70	542.1	10.924	6544.01	0		70	376.4	26.4117	6091.23	0
71	316.1	2.79667	3181.57	0	2041.6	1037.45		71	372.1	35.6368	6410.08	0		71	587.3	12.056	5924.02	0
72	317.2	2.881	0	1019.75	3471.29	193.193		72	616.2	15.3407	6391.98	0		72	331.2	21.4872	5767.72	0
73	316.2	2.88225	6771.28	10822.4	29633.5	3253.79		73	419.2	10.4543	6334.56	0		73	321.1	5.0565	5765.33	0
74	138.1	2.883	5530.67	584.822	188.235	455.197		74	462.1	8.46267	6334.4	0		74	497.1	14.6487	5652.81	0
75	316.3	2.93483	6926.4	6497.89	3328.51	6025.34		75	259	35.104	6332.89	0		75	151.9	15.769	5562.82	0
76	394	3.02033	1427.29	4115.21	3003.34	544.395		76	361.2	26.3247	6173.38	0		76	355.1	20.0758	5561.95	0
77	393.1	3.19217	7944.53	2609.72	6729.73	1935.9		77	956.3	15.0902	6135.69	0		77	285.1	23.2215	5533.23	0
78	152.3	3.377	271.597	0	3077.68	0		78	436	11.335	6112.91	0		78	321.1	16.6413	5510.88	0
79	261	3.434	3370.8	1040.86	632.544	0		79	721.9	15.1267	6086.22	0		79	152.2	42.6933	5507.68	0
80	359.1	3.52183	946.977	2410.76	1113.92	3115.84		80	359.1	22.7975	6073.72	0		80	265.2	23.2388	5457.94	0
81	393	3.59	2489.45	0	4750.46	1068.93		81	565.6	23.3228	6022.5	0		81	459.3	25.806	5444.28	0
82	359.4	3.661	0	0	3131.04	0		82	380.1	21.9035	6007.66	0		82	319.2	12.328	5404.14	0
83	331.3	3.785	0	0	3242.29	2064.09		83	498.4	15.5893	5943.6	0		83	395.2	6.73983	5317.57	0
84	373	3.8195	5000.18	1515.69	489.273	859.364		84	394.1	34.8347	5834.24	0		84	297.4	10.6123	5301.5	0
85	330.2	3.83733	6222.26	1964.29	20021.9	11280.6		85	370.9	21.7327	5829.12	0		85	631.3	23.2388	5244.07	0
86	261.2	3.909	1126.6	0	3073.7	0		86	548.3	9.9275	5758.93	0		86	513.3	15.4107	5242.76	0
87	330.3	3.909	0	195.09	20643.5	0		87	450.2	10.9412	5730.3	0		87	186.9	35.4562	5238.82	0
88	358.3	3.962	0	0	3191.23	499.289		88	595.3	12.056	5705.77	0		88	495.1	13.6048	5211.19	0
89	394.2	4.1045	2427.56	660.112	0	1584.75		89	376.1	26.1605	5666.09	0		89	393.1	35.2767	5195.06	0
90	416.1	4.21167	7423.12	2667.46	0	3723.78		90	623.2	12.11	5598.7	0		90	548.5	23.2458	5122.65	0
91	416.2	4.21908	1012.63	3813.88	7990.04	997.418		91	689.5	21.6702	5475.96	0		91	467.2	24.6274	5118.88	0
92	372.9	4.246	0	2063.73	4435.4	0		92	593.4	16.1185	5311.16	0		92	302.1	17.2022	5035.55	0
93	223.1	4.34675	282.001	4356.27	994.71	2544		93	428.2	7.1925	5293.03	0		93	260.9	15.8953	5014.5	0
94	370	4.4275	3006.7	0	0	0		94	770.6	15.0902	5261.68	0		94	940.3	14.9227	5006.5	0
95	599.5	4.49683	0	3343.75	198.22	0		95	379.1	28.2937	5255.48	0		95	481.2	28.4505	4968.22	0
96	111.2	4.529	542.409	0	4295.14	1666.1		96	458.1	8.15	5242.33	0		96	600.2	13.4125	4967.82	0
97	599.4	4.529	0	516.063	5764.91	2837.07		97	468.2	14.602	5225.65	0		97	723.1	27.1642	4964.85	0
98	460.2	4.5325	1560.66	3668.98	1254.74	538.871		98	371.9	39.0307	5217.46	0		98	582.6	22.6273	4935.74	0
99	300.1	4.565	0	1015.65	6052.97	462.417		99	508.3	9.48683	5216.54	0		99	301.2	24.557	4934.21	0
100	371.8	4.57733	0	0	0	2370.72		100	233.1	9.08383	5213.6	0		100	570.4	21.4185	4909.92	0
101	359.4	4.63308	3247.03	4095.7	2342.54	0		101	394.2	6.82533	5199.74	0		101	187	35.104	4905.36	0
102	460.3	4.64033	1156.91	2784.69	0	0		102	647.3	12.0202	5117.68	0		102	512.3	26.6783	4905.09	0
103	394	4.6505	2509.3	677.942	3161.56	4769.96		103	360.3	34.6147	5115.26	0		103	497.1	21.23	4895.08	0
104	337	5.025	0	475.472	2970.32	916.702		104	424.3	13.128	5093.9	0		104	622.2	12.1397	4888.38	0
105	373.1	5.03317	0	1828.99	3927.04	3094.44		105	497.1	28.2637	5083.76	0		105	939.4	18.5505	4865.98	0
106	321.2	5.03933	7896.98	1269.15	3247.28	692.562		106	370.9	25.9973	5046.3	0		106	883.4	7.53317	4805.28	0
107	321.1	5.0565	0	5765.33	422.805	0		107	394.2	24.4783	4989.43	0		107	406.4	12.6732	4729.6	0
108	370.1	5.05758	8797.79	3676.82	2137.45	2287.76		108	447	9.22383	4978.82	0		108	362.3	8.10983	4724.13	0
109	337.2	5.05767	3709.96	2038.7	750.834	349.287		109	196.1	35.0587	4966.09	0		109	713.5	6.15217	4704.48	0
110	307.7	5.132	0	0	2889.34	0		110	279.3	17.3405	4963	0		110	542.1	8.7545	4695.7	0
111	260.9	5.143	0	532.508	774.255	4000.44		111	371.8	18.895	4958.23	0		111	380.3	25.1542	4661.33	0
112	307.1	5.167	1214.7	1492.09	4619.97	1254.77		112	513.2	15.5362	4907.02	0		112	285.4	22.951	4631.92	0
113	373.2	5.17867	2142.76	820.018	1366.29	3642.16		113	393.2	9.53933	4887.66	0		113	275.2	8.1975	4607.53	0
114	370	5.1825	724.894	2974.36	0	0		114	375.1	29.7745	4887.02	0		114	667.3	7.418	4594.53	0
115	394.2	5.18317	5443.21	572.77	1822.14	1909.6		115	519.2	8.2715	4867.64	0		115	261.2	35.216	4586.21	0
116	359.3	5.20083	391.612	3912.48	3442.08	1289.62		116	468.5	20.7208	4829.92	0		116	289.2	9.42833	4576.39	0
117	372.8	5.274	0	358.428	4189.05	539.672		117	455	8.25483	4823.09	0		117	316.9	7.45725	4467.25	0
118	284.2	5.274	1728.89	0	2897.48	0		118	561.4	21.6322	4785.25	0		118	639.2	15.6067	4449.57	0
119	284	5.291	5366.85	11438.1	574.292	2101.58		119	232.1	35.3718	4764.35	0		119	347.4	16.3502	4438.49	0
120	306.2	5.30817	691.469	11322.4	5898.31	392.19		120	393	37.1305	4736.36	0		120	285.3	15.2525	4347.09	0
121	284.1	5.3235	3828.88	268.883	3355.97	3864.89		121	695.4	21.9738	4727.47	0		121	357.4	21.35	4343.58	0
122	322	5.3235	0	6744.64	5585.07	5231.42		122	372.2	5.61	4704.54	0		122	395.2	15.1127	4267.12	0
123	241.1	5.32633	693.524	7039.65	2158.66	2195.16		123	566.3	12.1285	4697.02	0		123	260.9	18.3742	4249.34	0
124	322.1	5.33492	12998.7	12740.2	4226.5	4661.99		124	471.2	15.0902	4664.53	0		124	509.1	11.8898	4220.83	0
125	306.1	5.36208	12357.8	6394.98	0	7292.06		125	359.1	6.94683	4661.82	0		125	429.1	25.6513	4220.08	0
126	430.1	5.37967	0	5374.18	0	455.87		126	340.2	26.2755	4625.01	0		126	347.2	35.1572	4209.22	0
127	151.8	5.38	0	0	3327.25	786.922		127	301.3	19.4498	4613.58	0		127	393.9	20.5182	4204.66	0
128	431.3	5.469	2787.89	5940.79	13204.9	2867.25		128	231.9	35.0132	4602.01	0		128	456.1	13.8652	4194.03	0
129	430.2	5.504	95370.3	77640.7	146406	78183.4		129	549.3	11.9835	4567.54	0		129	537.1	6.74175	4180.15	0
130	452.2	5.504	11208.8	13266.7	25230.6	4267.3		130	675.4	12.9463	4563.3	0		130	378.4	19.845	4176	0
131	453.2	5.504	869.756	804.577	7631.59	1694.44		131	409.1	25.2907	4510.77	0		131	372.2	1.268	4136.41	0
132	468.2	5.513	3448.97	0	3754.02	2051.81		132	436	11.749	4507.58	0		132	419.4	22.7347	4118.57	0
133	431.1	5.52083	0	0	2185.15	9654.63		133	395	21.3333	4424.01	0		133	359.4	4.63308	4095.7	0
134	468.3	5.548	0	3323.42	2856.7	1057.95		134	372	1.24667	4410.67	0		134	281.2	16.6238	4069.33	0
135	431.2	5.55692	15964.4	13598.2	16417.8	0		135	523.4	24.5607	4337.56	0		135	469.2	13.3095	4041.92	0
136	452	5.59233	0	0	0	4991.54		136	373	11.912	4323.74	0		136	883.9	7.34283	4039.54	0
137	371.1	5.59283	15882.9	28208.7	17115.5	10907.6		137	357.1	21.8632	4313.84	0		137	430.2	24.3772	4014.41	0
138	468.1	5.59283	4699.15	2507.66	5239.47	322.999		138	399.1	22.7057	4304.57	0		138	175.1	35.3968	4005	0
139	372.2	5.61	4704.54	0	0	0		139	390.2	11.1743	4190.65	0		139	498	15.0785	3984.71	0
140	452.1	5.61067	0	3532.94	0	0		140	652.4	16.0838	4174.77	0		140	189	35.6078	3871.64	0
141	241	5.716	1483.27	5799.99	0	5267		141	377.1	30.0533	4154.71	0		141	295.2	15.3577	3846.74	0
142	430.3	5.73367	7359.22	1534.13	0	2707.33		142	455.4	22.6627	4128.06	0		142	534	9.5745	3836.54	0
143	152.1	5.752	2012.58	5239.75	8169.81	9340.88		143	305.3	9.73317	4117.29	0		143	233.1	9.3185	3792.4	0
144	241.2	5.752	1101.12	3676.06	5061.85	0		144	382.1	10.3887	4115.23	0		144	196	35.3663	3774.36	0
145	241.1	5.7875	3264.88	0	647.52	393.577		145	955.3	15.3768	4109.89	0		145	908.2	7.34283	3763	0
146	291	5.83867	0	3673.8	159.3	0		146	556.1	11.2808	4104.93	0		146	394	6.94583	3709.16	0
147	393	5.84083	771.432	2431.89	1207.01	4656.58		147	470.2	15.305	4090.08	0		147	359	20.183	3701.69	0
148	430.1	5.858	1136.75	611.122	4846.99	0		148	675.3	12.855	4068.52	0		148	372.2	11.2093	3697.42	0
149	151.9	5.858	1610.69	0	4949.82	0		149	514.2	9.9095	4054.45	0		149	111	37.2735	3683.53	0
150	440.1	5.96083	0	3446.34	0	246.471		150	377.2	34.9678	4027.99	0		150	152.1	5.752	3676.06	0
151	289.2	6.01767	749.024	0	932.94	4004.8		151	325.1	7.48058	4025.7	0		151	291	5.83867	3673.8	0
152	751.4	6.12083	0	4258.12	3368.36	1586.69		152	574.3	11.4605	4013.1	0		152	426.1	11.3442	3661.78	0
153	713.3	6.13983	6122.95	0	7134.86	1737.1		153	259.2	35.5772	4006.06	0		153	721.4	25.993	3637.15	0
154	751.3	6.14133	2124.86	540.952	0	3981.5		154	507.3	9.83967	3952.77	0		154	371.9	39.0307	3631.78	0
155	714.5	6.142	2366.08	1825.74	3979.73	0		155	273.2	9.38742	3939.39	0		155	620.3	13.4482	3631.25	0
156	713.5	6.15217	0	4704.48	0	0		156	566.1	12.0202	3937.82	0		156	612.1	14.547	3602.02	0
157	736.4	6.15525	795.615	4403.05	4361.13	194.021		157	441.5	18.9143	3910.25	0		157	565.6	23.3228	3589.34	0
158	357.3	6.15842	16395.6	0	14398	24603.3		158	523.1	20.0263	3880.53	0		158	605.3	16.87	3586.56	0
159	357.2	6.16983	8030.41	30141	18752	3406.67		159	331.1	21.6442	3870.93	0		159	623.4	17.4168	3555.26	0
160	735.4	6.17233	8470.5	11414.5	20449.4	7500.21		160	532.3	27.7553	3804.11	0		160	393.8	25.2917	3537.19	0
161	373	6.177	531.035	0	4077.62	1572.49		161	622.2	12.1397	3797.46	0		161	452.1	5.61067	3532.94	0
162	713.4	6.17717	2649.7	1375.49	2779.65	5224.74		162	811	10.3355	3773.6	0		162	562.5	21.5385	3499.06	0
163	736.3	6.19433	6457.1	645.948	2624.16	1043		163	205	17.6325	3733.89	0		163	667.8	7.412	3479.54	0
164	751.5	6.195	0	0	3041.14	0		164	285.3	15.2525	3723.5	0		164	301.1	25.1708	3472.57	0
165	735.3	6.25583	3300.5	2954.31	762.069	0		165	399.1	19.9647	3699.2	0		165	393.9	26.6068	3460.32	0
166	293.3	6.29867	4149.25	576.984	545.868	367.467		166	359.1	42.0128	3679.26	0		166	332.9	6.30867	3433.42	0
167	308.2	6.29867	4037.41	168.683	849.24	0		167	631.3	15.0772	3674.86	0		167	454.1	7.383	3428.01	0
168	332.9	6.30867	1024.81	3433.42	1021.64	0		168	635.3	10.3887	3650.4	0		168	456.2	7.34283	3394.15	0
169	313.1	6.34283	4391.49	5175.47	11378.3	907.998		169	365.4	23.7315	3649.07	0		169	908.3	7.46383	3389.45	0
170	332.8	6.35133	3091.86	373.961	1588.98	456.802		170	189	35.6078	3635.92	0		170	371.8	16.8413	3384.41	0
171	313.2	6.371	1558.53	0	1401.19	3758.76		171	111.2	15.9807	3634.97	0		171	318.2	17.1487	3357.95	0
172	536.2	6.38783	0	748.139	1500.59	5256.1		172	379.3	25.1717	3632.04	0		172	928.3	6.89433	3355.44	0
173	371.9	6.3945	0	2534.4	0	0		173	382.3	34.657	3630.59	0		173	599.5	4.49683	3343.75	0
174	434.2	6.3945	4169.35	11555	1424.97	2155.6		174	396.3	21.709	3593.06	0		174	941.4	15.3768	3329.95	0
175	854.7	6.40383	3013.58	0	0	0		175	352.1	10.8342	3557.1	0		175	231.9	35.0132	3322.39	0
176	333.2	6.40567	539.892	2135.34	293.564	5186.55		176	372.3	15.3053	3515.42	0		176	305.1	21.6196	3313.15	0
177	333.1	6.408	1061.93	0	3477.41	0		177	354	28.5183	3491.64	0		177	392.9	24.2027	3310.8	0
178	434.3	6.426	0	0	2672.86	0		178	152	13.092	3489.36	0		178	556.1	11.2808	3280.62	0
179	313	6.426	289.488	858.07	6607.5	326.846		179	437.3	17.2357	3474.48	0		179	380.2	21.491	3280.53	0
180	395.1	6.4295	2778.34	5064.68	0	397.336		180	301.1	25.1708	3451.36	0		180	247.4	17.292	3278.48	0
181	317.1	6.45817	1731.76	3013.64	4592.69	5415.31		181	261.2	41.6273	3425.92	0		181	188.1	35.4562	3244.58	0
182	325.3	6.50883	9672.5	639.384	0	0		182	599.3	12.869	3412.15	0		182	499.2	11.9967	3241.38	0
183	326.2	6.58433	3828.75	4833.16	1822.14	2258.69		183	511.1	16.2065	3388.76	0		183	269.2	0.558167	3198.94	0
184	325.1	6.58567	0	7782.52	6342.85	0		184	781.2	10.7447	3387.7	0		184	363.1	35.216	3196.01	0
185	255.1	6.61667	460.791	1128.99	0	8458.8		185	513.4	28.2482	3386.12	0		185	548.3	28.5347	3183.88	0
186	255.2	6.638	207.102	733.615	3299.4	3884.11		186	262.1	35.3318	3383.53	0		186	727.4	22.7377	3173.69	0
187	325.2	6.6425	33211.1	9549.85	8030.29	5279.44		187	380.4	28.2637	3351.19	0		187	562.3	13.044	3164.1	0
188	537.2	6.71967	5758.66	12131.8	6844.71	16797.8		188	151.8	9.06717	3346.42	0		188	361.4	26.134	3132.34	0
189	255	6.7215	0	0	919.095	3495.36		189	421	10.6912	3345.36	0		189	232.1	35.3718	3075.42	0
190	416.1	6.725	809.098	7585.85	2788.42	851.841		190	394.2	8.18533	3342.04	0		190	295.4	20.218	3074.97	0
191	538.2	6.73308	210.639	1943.68	5481.56	3831.32		191	546.3	28.6935	3313.73	0		191	140	0.594167	3052.53	0
192	395.2	6.73983	3668.87	5317.57	980.267	0		192	718.3	15.1543	3310.25	0		192	372.8	15.4287	3030.72	0
193	537.1	6.74175	0	4180.15	6681.41	0		193	382.2	34.5252	3309.73	0		193	976.5	10.7023	3030.54	0
194	394.1	6.75417	11668	19950.9	12541.4	3758.3		194	359.4	43.405	3302.26	0		194	249.3	15.2002	3023.53	0
195	325.3	6.7565	4251.31	2739.42	435.585	1996.6		195	152.2	19.293	3266.07	0		195	582.5	22.7347	3011.76	0
196	371	6.7735	26712.8	7119.95	16454.2	14059.1		196	608.3	12.1285	3262.39	0		196	419.2	26.7853	3005.35	0
197	416.2	6.79133	1650.2	2573.88	0	800.707		197	283.1	24.0623	3257.76	0		197	370	5.1825	2974.36	0
198	394.2	6.82533	5199.74	9758.6	0	12175.8		198	261.2	0.209	3250.71	0		198	411	22.0587	2969.35	0
199	928.3	6.89433	659.241	3355.44	551.05	0		199	727.4	22.7377	3244.41	0		199	929.1	6.92933	2954.74	0
200	929.1	6.92933	0	2954.74	175.96	0		200	413.9	9.50467	3220.56	0		200	735.3	6.25583	2954.31	0
201	394	6.94583	0	3709.16	0	0		201	404	7.6285	3216.3	0		201	111.2	15.146	2935.56	0
202	359.1	6.94683	4661.82	754.334	0	422.322		202	533.4	27.7647	3193.65	0		202	413.3	23.316	2922.31	0
203	371.2	6.94967	0	5779.64	2310.08	11481.1		203	233.2	9.3295	3167.2	0		203	261.1	35.4257	2881.41	0
204	486.1	6.96333	2604.79	12081.5	4161.27	1083.08		204	948.5	13.7633	3149.53	0		204	379.4	22.2969	2869.74	0
205	434.1	6.9825	3874.42	3387.76	1932.97	2529.12		205	440.3	18.9567	3149.45	0		205	373.2	23.885	2854.2	0
206	486	6.98417	0	0	1206.64	6236.48		206	579.2	22.9478	3135.36	0		206	415.1	13.568	2829.97	0
207	275.1	7.00783	2422.46	2908.64	1644.24	3928.01		207	579.3	19.7572	3132.41	0		207	405.1	10.9957	2823.27	0
208	152.2	7.11883	2589.61	5375.06	3376.1	1030.76		208	532.4	14.3812	3124.85	0		208	419.4	22.5555	2812.13	0
209	432.2	7.1585	323.346	4107.52	1284.5	4528.38		209	375.4	24.9812	3112.05	0		209	152	0.736333	2792.7	0
210	383.1	7.188	4319.66	0	11316.7	1763.72		210	552.2	11.4068	3029.92	0		210	427.2	15.0547	2791.53	0
211	428.2	7.1925	5293.03	1746.26	0	1936.96		211	987	8.01167	3028.1	0		211	460.3	4.64033	2784.69	0
212	383.2	7.20775	8673.49	9798	12282.4	32580.2		212	437	14.7835	3024.18	0		212	668.3	9.02817	2777.25	0
213	384.3	7.2285	2367.81	0	1584.47	7869.39		213	854.7	6.40383	3013.58	0		213	393	7.649	2768.49	0
214	373.2	7.2395	1209.21	8528.4	3718.47	2716.95		214	419.9	10.4068	3012.52	0		214	373.3	17.2375	2753.11	0
215	432	7.24467	4455.5	0	784.31	0		215	484.5	21.8498	3010.69	0		215	861.3	9.64567	2752.25	0
216	223.1	7.25617	1761.12	3110.87	973.929	1713.55		216	370	4.4275	3006.7	0		216	526.3	29.1253	2751.61	0
217	334.2	7.29117	194.081	2268.29	171.465	0		217	578.6	25.8807	2969.04	0		217	856	9.68317	2722.08	0
218	317.1	7.29117	0	7648.52	0	600.656		218	525.5	28.4295	2969.04	0		218	955.4	15.1438	2719.49	0
219	383.3	7.30592	6208.14	530.325	2257.8	7082.59		219	263.1	34.702	2967	0		219	362.1	35.3663	2687.1	0
220	888.3	7.30767	0	8700.48	0	0		220	634.1	25.2222	2960	0		220	532.3	27.7553	2684.95	0
221	281.6	7.30767	0	3352.45	394.32	1261.02		221	110.9	22.268	2957.29	0		221	293.7	15.0257	2675	0
222	348	7.34283	0	3394.15	0	0		222	413.1	21.9035	2936.2	0		222	371.9	40.5867	2666.8	0
223	883.9	7.34283	0	3763	0	0		223	582.4	10.9957	2927.68	0		223	110.9	16.9862	2662.72	0
224	908.2	7.34283	0	4039.54	0	0		224	324.3	13.3465	2919.24	0		224	437.2	11.4068	2646.5	0
225	456.2	7.34283	3050.97	21390.5	7473.95	6010.86		225	381.4	22.0025	2917.54	0		225	300.9	22.609	2632.62	0
226	666.7	7.34283	0	15166.4	514.133	1343.11		226	587.2	12.1043	2910.48	0		226	623.2	12.11	2625.71	0
227	497.4	7.34283	0	3127	0	424.21		227	850.3	8.2195	2899.47	0		227	857.6	13.3078	2619.26	0
228	658.8	7.34283	0	7145.59	0	274.586		228	652.4	13.1643	2893.7	0		228	395	35.3663	2604.85	0
229	659.8	7.34283	0	3617.17	0	504.32		229	369.1	17.9363	2886.38	0		229	382.2	30.3193	2597.38	0
230	882.3	7.34283	160.214	14111.2	0	0		230	383.1	9.5225	2865.18	0		230	441.7	11.7293	2572.11	0
231	279.6	7.35033	548.416	3615.01	1408.29	5653.39		231	535.1	0.612	2863.06	0		231	110.9	24.1848	2562.91	0
232	471.2	7.36033	3979.63	12667.1	2409.96	494.483		232	161.2	35.104	2859.52	0		232	412.3	10.558	2551.45	0
233	472.1	7.36033	640.73	9079.93	543.15	1278.44		233	941.5	15.4652	2856.9	0		233	292.8	15.1825	2546.02	0
234	943.2	7.36033	585.21	3742.93	301.387	665.454		234	104	0.521333	2851.61	0		234	317	20.64	2538.11	0
235	362.1	7.36033	0	10807.6	1388.09	0		235	452.5	22.3713	2797.71	0		235	284.8	14.9917	2537.57	0
236	874.2	7.36033	157.314	7361.07	0	0		236	110.9	10.6912	2797.34	0		236	371.9	6.3945	2534.4	0
237	887.3	7.36392	1929.32	48111.3	3870.21	12021.9		237	395.1	6.4295	2778.34	0		237	498.2	23.131	2528.1	0
238	451.1	7.37242	1042.09	20385.6	3513.43	4496.28		238	521.2	10.9742	2765.04	0		238	449.3	28.5517	2520.68	0
239	456.1	7.37625	2409.41	0	2759.4	3750.91		239	849.2	8.18533	2762.36	0		239	476.1	10.1748	2494.85	0
240	273.8	7.377	0	5158.02	203.415	988.06		240	419.2	26.5555	2760.6	0		240	436	11.335	2467.42	0
241	281.7	7.377	2046.14	3530.67	0	986.744		241	566.4	23.1772	2754.05	0		241	521.3	11.0648	2459.2	0
242	455.1	7.377	0	42196.5	3668.54	9941.48		242	432.9	8.15	2745.62	0		242	359.3	35.1572	2437.25	0
243	888.2	7.377	425.015	16335	1622.19	0		243	582.3	22.8915	2735.15	0		243	882.9	11.9262	2436.39	0
244	874.8	7.377	0	5547.19	0	165.392		244	395	24.0085	2734.08	0		244	419.9	10.4068	2414.64	0
245	454.1	7.383	43789.8	191398	159800	159707		245	396.9	9.78583	2733.67	0		245	268.7	0.576167	2391.36	0
246	471.1	7.383	413.218	2722.61	3764.06	1231.4		246	411.2	24.7392	2727.38	0		246	453.4	20.6242	2379.5	0
247	886.3	7.383	8034.42	202312	30256.6	26422.8		247	440.5	21.8632	2723.14	0		247	262.1	35.3318	2365.62	0
248	323.7	7.383	0	3428.01	3571.14	0		248	629.2	13.4552	2704.42	0		248	395.3	14.768	2344.26	0
249	421.1	7.3845	5072.76	269.911	708.225	1500.75		249	373.3	14.0363	2696.64	0		249	599.4	21.709	2336.54	0
250	885.2	7.38583	35573.8	129206	42287.6	47724.8		250	481.1	21.4285	2691.36	0		250	961.3	15.0608	2321.09	0
251	271.8	7.38583	0	192.091	0	3664.42		251	395.2	39.5552	2684.78	0		251	338.4	26.897	2318.73	0
252	280.1	7.38583	0	0	1373.85	2314.36		252	281	22.6142	2674.38	0		252	360	35.4868	2295.13	0
253	384.1	7.38583	157.025	0	0	4316.32		253	245.3	37.6452	2670.96	0		253	477.3	8.10983	2293.63	0
254	470.2	7.3945	9340.8	48445.4	0	8966.4		254	503.3	15.0024	2655.3	0		254	352	10.9385	2281.25	0
255	659.9	7.3945	0	2559.74	0	177.931		255	579.5	22.7975	2652.67	0		255	282.4	21.1438	2278.04	0
256	883.3	7.3945	0	12832.8	885.708	0		256	988.4	9.06717	2626.68	0		256	334.2	7.29117	2268.29	0
257	452.2	7.398	2812.18	5929.67	258.64	366.387		257	542.1	8.7545	2587.4	0		257	512.5	17.309	2260.9	0
258	443.2	7.4	0	2147.82	3640.29	329.146		258	393.2	1.42617	2586.7	0		258	246.1	35.3968	2244.94	0
259	455.2	7.40125	29191.2	30806.5	50707.3	29812.5		259	528.4	25.5663	2576.79	0		259	634.8	12.1758	2235.32	0
260	316.1	7.40133	18601.3	83548.8	38728	18513.2		260	691.5	23.3023	2555.57	0		260	376.1	26.1605	2205.71	0
261	451.2	7.40133	3747.74	16385.3	2340.48	3624.79		261	690	9.6805	2540.82	0		261	390.2	11.1743	2202.37	0
262	279.5	7.40925	2637.55	0	6765.09	0		262	373	16.3637	2531.55	0		262	275.1	12.2378	2201.72	0
263	470.1	7.41075	7511.4	22018.6	14162.9	13401.4		263	625.1	13.2552	2531.28	0		263	379.1	24.841	2170.9	0
264	667.8	7.412	0	3479.54	0	0		264	226.9	34.792	2529.02	0		264	460.2	15.3407	2125.2	0
265	887.2	7.415	443.153	49911.9	14655.8	0		265	479.8	15.072	2524.75	0		265	303.6	12.051	2089.01	0
266	667.3	7.418	0	4594.53	3055.98	0		266	937.1	10.9412	2511.29	0		266	372.9	4.246	2063.73	0
267	261.2	7.419	4108.8	0	463.406	0		267	654.4	16.3548	2488.36	0		267	364	9.51617	2054.31	0
268	324.3	7.42017	0	0	0	5426.89		268	888.7	12.6548	2486.76	0		268	622.1	12.0743	2053.04	0
269	279.7	7.42017	0	5420.37	568.71	2538.62		269	393.9	21.8767	2480.96	0		269	295.3	20.4142	2035.09	0
270	323.5	7.42967	458.031	4525.12	3089.56	3126.76		270	281	22.351	2447.81	0		270	714.5	6.142	1825.74	0
271	885.3	7.436	0	403537	56119.6	25153.1		271	394.2	4.1045	2427.56	0		271	271.8	7.897	1780.71	0
272	454.2	7.43658	48254.4	199169	114144	33831.9		272	152.4	40.7027	2422.22	0		272	511.4	26.308	1717.91	0
273	316	7.44092	3064.28	61960.5	38650.7	23088		273	433.4	8.48033	2413.68	0		273	513.1	11.4068	1716.06	0
274	886.2	7.44108	6143.38	87227.6	21112.5	5676.12		274	303.3	21.556	2409.4	0		274	377.1	25.674	1614.67	0
275	316.9	7.45725	0	4467.25	3582.89	0		275	394.9	0.521333	2388.05	0		275	549.2	15.1267	1569.08	0
276	908.3	7.46383	0	3389.45	0	0		276	831.3	10.6378	2383.94	0		276	394	14.8192	1531.14	0
277	324.1	7.46383	2813.38	4427.62	553.8	926.862		277	400.1	8.2195	2380.57	0		277	653.3	9.1715	1519.74	0
278	325.3	7.471	0	975.502	4185.49	806.723		278	681.6	21.6413	2372.74	0		278	152.3	36.6045	1516.04	0
279	325.1	7.48058	4025.7	375.904	0	5439.46		279	540.5	28.3542	2370.96	0		279	469.3	21.012	1515.78	0
280	413.3	7.48133	0	3291.95	210.276	1012.73		280	378.1	29.5863	2361.68	0		280	675.3	12.855	1490.66	0
281	281.3	7.498	1259.23	2462.93	0	902.498		281	959.8	16.748	2336.24	0		281	359.4	17.0617	1470.86	0
282	429.1	7.50667	3274.2	0	557.568	0		282	659.3	9.04967	2323.52	0		282	373	11.912	1377.39	0
283	323.4	7.51567	371.916	4726.54	0	794.023		283	152.3	36.6045	2305.25	0		283	152.2	7.994	1373.28	0
284	404.1	7.51567	855.579	10530.8	0	1419.59		284	638.1	19.0692	2287.66	0		284	479.3	21.7523	1341.25	0
285	574.2	7.52092	2309.46	5448.4	9603.98	1553.91		285	284.9	15.2872	2284.37	0		285	308.2	9.12	1335.08	0
286	883.4	7.53317	0	4805.28	0	0		286	396.1	25.1193	2282.02	0		286	497.1	15.358	1306.56	0
287	281.4	7.55083	289.51	2580.5	510	747.896		287	405.9	9.032	2280.96	0		287	556.2	9.48683	1301.71	0
288	275	7.55083	0	4000.44	0	316.853		288	187	36.517	2280.13	0		288	525.4	28.687	1255.32	0
289	412.2	7.55867	5100.14	2800.07	1739.56	1263.47		289	852.9	11.6228	2274.76	0		289	547.5	28.5333	1249.82	0
290	325.2	7.56	970.264	0	9352.53	1535.36		290	293.3	8.02833	2266.3	0		290	504.2	15.3235	1219.41	0
291	917.3	7.5675	0	8349.81	0	0		291	524.1	24.4792	2256.67	0		291	365.4	23.7315	1199	0
292	596.3	7.578	1782.53	0	5556.09	3206.06		292	392.8	1.498	2248.22	0		292	485.4	21.615	1195.06	0
293	404	7.6285	3216.3	0	0	662.551		293	626.8	12.0385	2243.87	0		293	393.2	9.53933	1192.81	0
294	393	7.649	0	2768.49	8517.11	0		294	110.9	29.401	2243.87	0		294	359.1	22.7975	1140.64	0
295	377.2	7.78483	6576.82	1368.72	1614.14	349.377		295	999.4	13.2319	2237.38	0		295	457.1	8.19992	1106.28	0
296	451.1	7.82867	694.247	7758.88	0	257.487		296	979.7	10.7627	2214.34	0		296	441.1	15.252	1087.86	0
297	472.1	7.82867	0	3521.95	0	411.745		297	316.2	8.2725	2211.35	0		297	654.5	9.1715	1070.26	0
298	455	7.83733	776.102	0	849.87	4430.06		298	296.3	12.1468	2202.82	0		298	442.3	18.584	1063.65	0
299	317.1	7.86417	0	4739.03	1308.38	1468.41		299	392.9	12.749	2201.37	0		299	369.4	21.509	1063.48	0
300	279.4	7.881	3097.82	16350.5	5335.94	779.225		300	346.2	21.7985	2190.47	0		300	962.4	15.3407	1047.61	0
301	316	7.88883	10286.4	13511.9	5778.34	9398.75		301	451.2	24.7395	2155.12	0		301	247.3	17.184	1044.96	0
302	455.1	7.88883	14933.5	9864.26	7082.48	11733.3		302	566.2	12.0863	2155.04	0		302	261	3.434	1040.86	0
303	271.8	7.897	0	1780.71	2224.99	0		303	483.4	21.743	2152.02	0		303	463.2	8.30683	1015.83	0
304	279.7	7.907	380.373	6294.45	2611.38	9104.43		304	151.8	42.1768	2134.18	0		304	457.3	22.802	1001.03	0
305	470.2	7.92433	7827.75	16041.4	2762.36	1564.26		305	751.3	6.14133	2124.86	0		305	261.2	0.209	1000.64	0
306	399.3	7.9765	488.128	1108.58	0	10779.9		306	941.7	16.3468	2097.55	0		306	359.4	14.72	997.154	0
307	152.2	7.994	4657.25	1373.28	1888.7	0		307	305.1	21.6196	2090.88	0		307	955.3	15.3768	984.208	0
308	987	8.01167	3028.1	0	0	0		308	668.3	9.02817	2080.38	0		308	395.1	25.479	984.028	0
309	370.9	8.021	0	0	10542.5	0		309	852.3	13.7012	2052.78	0		309	279.2	17.1668	965.861	0
310	293.3	8.02833	2266.3	0	0	0		310	527.2	15.1825	2048.35	0		310	509.2	15.943	957.42	0
311	151.9	8.04617	0	0	813.66	3025.44		311	281.7	7.377	2046.14	0		311	359.1	42.0128	942.458	0
312	348.1	8.074	1973.67	16381.5	3545.69	2701.86		312	152.2	1.643	1974.62	0		312	460.2	15.0363	937.757	0
313	376.2	8.08617	11691.8	2377.58	7377.74	10524.1		313	393.9	26.6068	1809.3	0		313	493.2	24.6003	925.635	0
314	362.3	8.10983	0	2293.63	0	0		314	348.2	8.15	1800.45	0		314	689.4	21.668	900.415	0
315	477.3	8.10983	0	4724.13	0	0		315	261.1	36.3195	1785.87	0		315	437	14.7835	869.932	0
316	473.1	8.127	1788.6	0	5096.4	331.248		316	245.1	36.2988	1783.04	0		316	355.1	29.353	867.086	0
317	394.1	8.13333	11759.7	9609.49	14319.7	9417.58		317	631.3	23.2388	1780.12	0		317	354.4	21.774	850.962	0
318	455.1	8.13333	12294.9	12303.7	3065.07	5575.14		318	613.3	13.5527	1746.79	0		318	152	38.7652	813.71	0
319	432.1	8.14467	3170.65	6754.23	478.06	1317.65		319	474.4	22.7347	1717.87	0		319	523.3	27.375	810.939	0
320	849.3	8.14467	618.006	5272.45	934.92	2056.53		320	319.3	16.4778	1668.17	0		320	313.2	25.2395	802.818	0
321	455.2	8.145	7801.74	37950.4	31267.1	7418.94		321	416.2	6.79133	1650.2	0		321	440.2	20.055	801.408	0
322	348	8.14817	4784	3098.61	3060.68	260.308		322	497.1	14.6487	1642.28	0		322	152.2	36.946	795.929	0
323	432.9	8.15	2745.62	0	0	0		323	579.3	22.8073	1615.09	0		323	886.1	8.163	783.962	0
324	348.2	8.15	1800.45	814.318	0	6039.54		324	395.3	14.768	1601.03	0		324	361.2	26.3247	781.468	0
325	457.2	8.15	8325.33	4420.27	15388.6	2546.34		325	241	5.716	1483.27	0		325	713.3	23.0433	771.632	0
326	458.1	8.15	5242.33	1971.81	0	982.327		326	419.4	22.5555	1439.21	0		326	625.3	25.266	769.378	0
327	886.1	8.163	0	0	3138.31	0		327	939.4	18.5505	1366.22	0		327	152.1	18.1297	755.72	0
328	454.1	8.163	34027.7	44454.5	77185.9	68183.8		328	413.3	26.0975	1318.2	0		328	566.3	12.1285	755.013	0
329	458.2	8.163	180.669	783.962	4112.37	0		329	281.3	7.498	1259.23	0		329	394.9	0.521333	754.863	0
330	359.3	8.16767	7702.69	1027.94	0	5942.64		330	481.2	19.4857	1222.95	0		330	303.2	22.0323	753.034	0
331	377.3	8.16767	3407.96	0	300.8	649.128		331	442.1	15.11	1199.13	0		331	381.4	23.972	738.286	0
332	419	8.1805	2411.92	2859.09	1496.72	939.064		332	537.4	25.1028	1198.86	0		332	374.1	24.468	727.287	0
333	315.9	8.18533	0	0	0	3691.01		333	513.6	26.6374	1180.41	0		333	956.3	15.0902	720.012	0
334	394.2	8.18533	3342.04	818.43	0	5824.87		334	567.3	12.1397	1164.1	0		334	555.3	14.313	719.724	0
335	849.2	8.18533	2762.36	0	0	177.927		335	460.3	4.64033	1156.91	0		335	378.4	29.7588	712.274	0
336	275.2	8.1975	0	4607.53	1829.56	0		336	377.4	26.8955	1150.87	0		336	737.5	17.822	704.057	0
337	457.1	8.19992	2899.99	1106.28	5854.46	0		337	359.3	38.589	1146.43	0		337	311.2	9.207	681.631	0
338	418.2	8.20867	9637.16	2544.7	5427.09	11853.2		338	301.1	26.2542	1145.31	0		338	540.5	28.3542	676.633	0
339	400.1	8.2195	2380.57	0	0	798.391		339	370.1	8.42833	1144.45	0		339	481.1	15.9608	668.448	0
340	850.3	8.2195	2899.47	0	0	250.599		340	392.9	24.2027	1142.1	0		340	426.4	19.08	662.509	0
341	395.2	8.21967	1878.83	2430.36	1226.22	4645.96		341	261	9.9575	1131.95	0		341	152.2	34.9678	659.381	0
342	470.2	8.21967	0	1594.7	1858.18	9093.23		342	540.4	24.4408	1127.6	0		342	462.1	8.46267	652.12	0
343	396.1	8.233	7480.2	6479.79	16581	1962.77		343	394	8.86117	1122.51	0		343	346.2	21.7985	644.146	0
344	470.9	8.23717	2152.13	0	689.055	0		344	140	0.594167	1099.85	0		344	373	16.3637	640.419	0
345	399.2	8.25325	13764.8	10634.9	17715.2	26274.4		345	482.3	14.9053	1090.24	0		345	325.3	6.50883	639.384	0
346	418.1	8.25483	13013.6	13364.4	8334.93	0		346	331.2	21.4872	1081.34	0		346	453.3	12.788	621.777	0
347	455	8.25483	4823.09	0	0	2749.91		347	416.2	8.68167	1074.89	0		347	495.1	12.274	615.158	0
348	400.2	8.26025	669.094	3009.62	5985	666.649		348	532.2	14.2077	1044.28	0		348	430.1	5.858	611.122	0
349	519.2	8.2715	4867.64	0	0	1981.43		349	525.2	24.2027	1029.62	0		349	111.2	41.43	609.648	0
350	316.2	8.2725	2211.35	1308	0	3822.03		350	395.1	25.1717	1025.42	0		350	533.4	27.7647	573.849	0
351	434.2	8.2725	335.721	1444.48	1369.52	3428.28		351	187.1	36.3635	936.021	0		351	286.3	22.7273	564.849	0
352	419.2	8.28917	2709.52	1783.63	1186.41	1132.36		352	723.1	27.1642	871.126	0		352	570.2	21.987	561.463	0
353	396.2	8.29767	19359.9	9701.94	5663.9	23171.2		353	404.1	7.51567	855.579	0		353	245.3	37.6452	548.952	0
354	400.3	8.2985	4783.25	0	3121.76	3780.16		354	394.3	19.9163	855.004	0		354	628.3	26.329	537.464	0
355	223	8.304	1035.12	3296.87	3760.92	2568.25		355	305	23.7553	839.112	0		355	399.1	10.442	529.842	0
356	463.2	8.30683	4142.86	1015.83	634.014	0		356	289.2	9.42833	833.691	0		356	350.2	9.57517	526.306	0
357	497.2	8.30683	3615.67	832.359	328.423	1282.58		357	349.2	36.2553	829.335	0		357	548.2	11.955	521.349	0
358	341.3	8.322	1029.46	1277.56	7217.62	1684.89		358	395	35.3663	816.301	0		358	151.9	43.078	507.822	0
359	418.3	8.3245	0	706.253	507.936	4479.56		359	362.1	35.3663	775.301	0		359	941.3	15.1267	501.243	0
360	484.2	8.3245	5348.76	575.501	1189.15	1148.59		360	237.2	9.0315	774.459	0		360	394.3	25.691	457.949	0
361	462.2	8.37592	14790.7	6009.39	4286.45	4297.11		361	548.3	28.5347	764.68	0		361	595.3	12.056	444.872	0
362	399.3	8.39317	14345.5	0	5980.12	3725.59		362	881.6	24.4595	751.807	0		362	413.9	9.50467	442.333	0
363	432.2	8.41067	5512	1344.34	351.45	422.662		363	284.2	23.599	739.237	0		363	508.3	9.48683	434.643	0
364	370.1	8.42833	1144.45	0	0	3302.96		364	551.2	9.52683	730.687	0		364	455.3	13.586	422.881	0
365	769.4	8.44533	3869.51	7510.38	1453.99	1663.2		365	370	5.1825	724.894	0		365	567.3	15.3938	396.638	0
366	367.2	8.446	1.74993e+06	1.29938e+06	1.12113e+06	1.67117e+06		366	152.1	9.2245	715.634	0		366	434.1	9.9275	380.172	0
367	769.3	8.446	2551.27	0	4050.23	1058.49		367	492.2	25.3652	703.867	0		367	549.3	14.7425	368.315	0
368	368.2	8.44617	365772	303079	272393	456179		368	451.1	7.82867	694.247	0		368	441.1	13.285	364.134	0
369	462.1	8.46267	6334.4	652.12	0	0		369	640.1	15.5427	688.701	0		369	811	10.3355	362.112	0
370	387.1	8.46367	0	0	2922.36	10868		370	482.2	21.9362	684.314	0		370	305.2	36.733	362.024	0
371	369.2	8.464	18752	32023.1	45956.4	38406.2		371	547.1	10.5567	681.663	0		371	372	29.3285	358.521	0
372	433.4	8.48033	2413.68	0	0	0		372	628.3	21.6682	671.247	0		372	326.3	10.006	351.951	0
373	770.4	8.48083	4708.46	196.218	3380.22	2635.18		373	284.1	23.1393	655.031	0		373	566.1	12.0202	349.044	0
374	368.3	8.48267	74726.8	100392	0	0		374	471.2	10.2848	653.501	0		374	632.3	16.0135	340.314	0
375	370.3	8.48967	908.007	618.205	6505.81	4671.26		375	295	15.4818	651.244	0		375	262	36.893	317.744	0
376	369.3	8.49	36200.6	25297.5	0	11587.3		376	377.1	24.0953	641.182	0		376	312.4	26.01	300.032	0
377	152.3	8.49783	2999.09	227.329	254.933	1116.58		377	360	35.4868	635.517	0		377	576.3	26.861	291.191	0
378	403.2	8.51533	6838.1	4765.52	13349.5	27094.8		378	360.2	35.127	633.452	0		378	484.5	21.8498	268.664	0
379	387.2	8.52425	0	0	10469.4	18637		379	684.2	13.2588	627.443	0		379	151.8	42.1768	260.55	0
380	365.2	8.532	342.715	2935.83	4943.61	5534.1		380	151.8	19.276	608.013	0		380	425	8.659	259.181	0
381	444.3	8.532	2617.67	0	201.6	0		381	429.1	25.6513	599.08	0		381	419.2	18.159	251.173	0
382	403.1	8.535	25426.2	21830.4	69923.7	3951.85		382	654.4	9.15383	578.705	0		382	747.3	21.633	220.225	0
383	404.1	8.53508	1628.14	7952.81	11218.9	4511.3		383	259.1	36.3195	570.359	0		383	551.3	25.815	220.122	0
384	404.2	8.5495	9864.03	1160.46	9268.53	4428.9		384	378.4	22.8595	568.931	0		384	281	22.6142	219.019	0
385	425.1	8.552	0	344.379	6239.16	770.469		385	395.1	36.277	561.148	0		385	296.3	12.1468	215.329	0
386	389.3	8.567	0	0	1882.11	5080.46		386	378.4	19.845	547.678	0		386	378.4	27.6528	203.477	0
387	152.2	8.56717	3766.72	1034.01	715.5	1281.62		387	654.4	15.0608	532.324	0		387	261.2	3.909	195.09	0
388	542.3	8.601	2325.91	0	2755.44	7196.34		388	295.2	11.666	529.404	0		388	553.3	25.2222	194.851	0
389	542.2	8.609	15930.1	17862.2	9035.35	4991.33		389	481.4	28.6017	528.683	0		389	629.2	13.4552	191.287	0
390	365.1	8.6185	0	0	0	3824.83		390	684.3	13.3592	520.261	0		390	623.4	26.95	185.854	0
391	543	8.6185	462.177	0	0	4533.22		391	556.6	27.0155	517.029	0		391	675.4	12.9463	182.289	0
392	394.2	8.64567	15405.8	16317.9	3929.07	3698.32		392	442	15.1987	513.156	0		392	394	15.8018	177.95	0
393	425	8.659	292.558	259.181	2733.74	0		393	538.4	25.1717	498.374	0		393	354.4	17.911	176.355	0
394	416.1	8.67017	9292.98	611.668	0	944.831		394	399.3	7.9765	488.128	0		394	337.2	19.754	173.307	0
395	416.2	8.68167	1074.89	6533.38	0	209.227		395	303.6	12.051	469.876	0		395	381.4	18.336	171.874	0
396	367.3	8.68767	176721	0	14212.5	47490.6		396	111.2	0.523167	464.116	0		396	293.3	6.29867	168.683	0
397	543.2	8.68767	9087.43	2017.53	1800.09	355.041		397	381.1	21.6322	463.611	0		397	392.2	14.951	166.405	0
398	309.2	8.73	169312	94880.2	74022.7	118544		398	543	8.6185	462.177	0		398	471.2	15.0902	164.689	0
399	365.3	8.73867	0	0	1130.67	4069.58		399	255.1	6.61667	460.791	0		399	377.3	30.3295	182003	923.813
400	542.1	8.7545	2587.4	4695.7	0	0		400	452.9	14.5522	444.131	0		400	378.3	30.349	31426.6	268.279
401	310.3	8.756	14911.7	0	5763.47	28076.8		401	510.1	13.8607	428.511	0		401	570.3	11.9945	29271	249.903
402	311.2	8.7735	818.902	1024.86	310.464	2734.92		402	260.9	44.8035	423.52	0		402	419.4	26.6675	11491.3	185.28
403	309.3	8.836	12149.2	29668.1	49162.5	0		403	424.1	13.2418	413.062	0		403	523.3	19.8982	7869.44	190.328
404	378.6	8.854	0	0	2214.43	0		404	340.5	26.913	384.771	0		404	652.3	11.1644	11579.7	331.684
405	378.1	8.854	242.678	0	4543.29	0		405	373.2	23.885	383.417	0		405	961.4	15.2525	7300.91	209.588
406	394	8.86117	1122.51	5220.63	0	3219.39		406	295.1	14.8977	381.88	0		406	511.3	26.327	10262.3	305.64
407	277.1	8.882	0	4229.11	983.143	1537.25		407	323.4	7.51567	371.916	0		407	281.7	7.377	5547.19	165.392
408	295.2	8.911	3647.73	0	1532.76	752.184		408	438.3	13.6102	369.876	0		408	653.3	13.2553	5422.42	171.648
409	277.2	8.9285	5062.39	0	1470.18	177.791		409	555.3	9.46433	363.565	0		409	524.4	28.6013	25779.4	821.474
410	368.1	8.946	3034.67	0	642.96	0		410	342.3	17.356	356.301	0		410	416.2	8.68167	6533.38	209.227
411	308.1	9.00967	0	3278.88	0	595.957		411	409.3	16.8175	349.916	0		411	451.1	7.82867	7758.88	257.487
412	668.3	9.02817	2080.38	2777.25	0	0		412	718.8	15.2525	327.542	0		412	377.4	28.7628	20426.6	703.739
413	237.2	9.0315	774.459	2269.65	0	5409.42		413	512.5	17.309	291.348	0		413	306.2	5.30817	11322.4	392.19
414	237.1	9.03192	5382.4	5044.69	8712.24	2791.14		414	549.1	9.88533	269.398	0		414	638.2	17.949	9662.43	336.662
415	405.9	9.032	2280.96	0	0	0		415	366.5	28.6847	264.426	0		415	477.3	12.7093	4379.06	165.195
416	273.2	9.032	6118.46	586.569	395.38	884.863		416	392.2	19.7812	263.833	0		416	666.7	7.34283	7145.59	274.586
417	659.3	9.04967	2323.52	0	0	0		417	423.2	22.3713	229.216	0		417	943.2	7.36033	12667.1	494.483
418	237	9.06417	0	4775.81	0	3330.18		418	263.1	21.597	226.158	0		418	420.2	26.6783	4550.09	191.361
419	151.8	9.06717	3346.42	0	0	0		419	634.8	12.1758	181.859	0		419	379.1	28.2937	70086	3041.67
420	988.4	9.06717	2626.68	0	0	0		420	369	21.5385	181.106	0		420	736.4	6.15525	4403.05	194.021
421	233.1	9.08383	5213.6	971.639	0	540.292		421	362.5	26.3245	177.129	0		421	499.3	12.762	7373.47	326.305
422	307.2	9.09258	51393.8	37064.7	17933.5	12669.7		422	478.5	21.7212	172.146	0		422	521.2	26.3938	11103.7	511.28
423	307.1	9.0935	0	9016.53	0	8419.58		423	452.2	11.4068	164.93	0		423	441.2	15.3587	26104.1	1217.4
424	367.1	9.102	3679.5	1518.49	3088.8	905.526		424	882.3	7.34283	160.214	0		424	279.4	7.881	16350.5	779.225
425	308.2	9.12	7393.23	1335.08	5157.37	0		425	874.2	7.36033	157.314	0		425	281.3	16.7142	10761.4	524.136
426	309.2	9.13658	372738	253086	301582	554028		426	384.1	7.38583	157.025	0		426	379.3	28.6182	3984.65	200
427	653.5	9.137	0	0	0	2603.78		427	477.3	22.0037	134.756	0		427	482.1	15.715	10701.4	542.321
428	311.3	9.137	3717.71	1397.01	602.79	2930.11		428	371.2	30.002	63.4042	0		428	437.3	18.391	3421.72	175.198
429	310.2	9.13717	102311	97121.5	85284.7	77270.3		429	425.2	18.0108	17157.4	192.417		429	560.2	22.7712	3904.29	200.776
430	331	9.146	1915.5	0	3244.66	3943.2		430	781.4	10.6482	72698.8	1140.62		430	526.4	28.6178	70633.7	3762.7
431	654.4	9.15383	578.705	697.989	0	3057.84		431	410.2	13.9633	9816.55	181.246		431	527.5	28.7086	9298.94	524.108
432	653.3	9.1715	2804.76	1519.74	1150.56	0		432	941.3	15.1267	13899.8	276.66		432	512.5	25.9433	18380.8	1068.56
433	654.5	9.1715	5379.12	1070.26	235.32	0		433	962.4	15.3407	7412.58	160.815		433	498.3	11.5142	5781.14	337.273
434	524.3	9.18967	0	0	0	7300.77		434	532.4	27.8265	8012.79	180.2		434	718.3	15.1543	2841.91	167.256
435	311.2	9.207	7798.49	2863.42	1697.61	1721.34		435	783.3	10.436	20118.8	504.231		435	521.2	10.9742	3492.55	209.283
436	484.2	9.207	5171.82	681.631	897.82	0		436	377.3	30.0092	92388.9	2759.18		436	381.2	10.436	9926.92	597.739
437	259.3	9.208	0	0	3289.83	850.314		437	468.1	9.2415	8969.72	278.123		437	911.2	9.55567	3811.41	232.866
438	447	9.22383	4978.82	0	0	0		438	528.4	28.4143	5677.45	177.497		438	528.4	25.5663	5910.75	361.197
439	152.1	9.2245	715.634	1625.72	0	5359.36		439	606.3	12.008	15339.3	489.9		439	452.2	7.398	5929.67	366.387
440	251.6	9.22525	0	0	5681.74	4339.64		440	138.1	2.883	5530.67	188.235		440	885.3	7.436	403537	25153.1
441	325.3	9.226	972.983	626.043	7643.21	1116.13		441	622.4	17.914	7010.7	248.802		441	479.8	15.072	13158.2	827.324
442	468.1	9.2415	8969.72	2699.11	278.123	3481.39		442	378.3	29.8657	126905	4545.13		442	378.4	21.4698	3429.84	220.186
443	446	9.24233	0	653.785	0	4643.86		443	375.3	11.0672	5395.54	194.503		443	886.2	7.44108	87227.6	5676.12
444	502.3	9.244	0	0	3853.55	968.152		444	412.2	10.5132	8824.6	327.291		444	527.4	28.5573	44251.4	2978.6
445	307.3	9.25142	3529.83	0	9676.59	8414.28		445	450.1	0.5945	10293.3	398.933		445	659.9	7.3945	2559.74	177.931
446	542.2	9.25333	5482.67	8441.84	4544.35	6171.79		446	367.1	13.092	4841.31	188.126		446	440.1	5.96083	3446.34	246.471
447	428.1	9.25933	7482.61	1426.63	759.22	1614.51		447	591.2	16.0838	14238.2	580.32		447	592.3	15.9817	12136.8	880.276
448	367	9.25958	6580.76	0	684.99	3845.68		448	482	9.5225	11462.2	467.535		448	275.2	12.1928	8886.14	646.352
449	524.2	9.261	0	0	13363.1	1808.71		449	484.1	9.49383	8399.95	347.733		449	395.1	6.4295	5064.68	397.336
450	306.2	9.27817	398.411	0	643.07	3711.5		450	652.3	13.141	9478.48	400.991		450	317.1	7.29117	7648.52	600.656
451	446.2	9.297	16329.6	7887.46	8250.16	2692.12		451	528.3	25.5967	8937.92	389.16		451	281.4	7.55083	4000.44	316.853
452	305.2	9.30508	2488.73	4724.97	14515.6	18688		452	654.5	9.1715	5379.12	235.32		452	470.2	15.305	6153.14	502.878
453	588.3	9.31317	0	215.37	284.62	3012.14		453	498.3	15.4559	11172.8	499.14		453	348	8.14817	3098.61	260.308
454	601.3	9.31317	0	0	2381.82	5187.9		454	377.3	29.8657	435576	19475.2		454	430.1	5.37967	5374.18	455.87
455	233.1	9.3185	0	3792.4	0	0		455	551.2	13.0192	18944.4	859.851		455	727.6	22.7331	3365.01	287.807
456	447.2	9.3295	5366.54	341.457	2023.68	1020.49		456	366.3	28.1565	11149.4	537.136		456	437.2	18.4602	1904.43	166.139
457	233.2	9.3295	3167.2	0	0	1818.51		457	770.4	10.4238	3700.06	179.424		457	396.2	9.66467	8086.85	708.292
458	289.1	9.337	2690.72	4951.85	1581.52	729.021		458	428.3	9.34633	3794.97	192.463		458	497.3	28.5845	3851.79	338.372
459	359	9.337	0	3830.11	0	607.994		459	753.4	23.1382	3397.33	174.933		459	497.4	7.34283	15166.4	1343.11
460	587.3	9.34058	631.203	2061.3	9777.1	10352.4		460	547.5	28.5333	3703.37	200.34		460	498.4	15.5893	2575.02	228.28
461	428.3	9.34633	3794.97	869.716	192.463	734.761		461	289.6	10.3887	3299.78	184.8		461	509.2	11.8182	5507.73	493.236
462	555.4	9.3555	732.449	2827.57	547.371	2489.58		462	356.3	20.1702	5558.34	314.456		462	486.1	6.96333	12081.5	1083.08
463	557.4	9.364	4128.7	2703.45	650.945	258.67		463	495.3	13.6907	9982.74	600.514		463	124.1	0.647167	5561.6	498.916
464	349	9.36617	294.632	0	256.52	2698.59		464	713.3	23.0433	2735.99	167.676		464	151.9	21.3162	3023.51	271.834
465	273	9.385	0	0	14210.4	4202.38		465	281.3	16.7142	7820.12	479.7		465	152.3	44.6198	2450.98	223.528
466	309.3	9.385	0	0	28623.5	5117.36		466	640.3	15.412	2708.3	167.676		466	382.2	10.4905	9631.23	907.753
467	273.2	9.38742	3939.39	18786	0	12560.4		467	531.3	11.8288	23308.3	1459.67		467	431.2	12.496	9696.64	925.454
468	305.1	9.39692	5960.61	8469.91	10538.2	20070.6		468	546.3	24.618	8571.85	544.914		468	557.4	9.364	2703.45	258.67
469	289.2	9.42833	833.691	2788.27	0	1535.87		469	432.2	8.41067	5512	351.45		469	528.4	28.4143	3548.22	340.622
470	310	9.42833	0	4576.39	5351.75	0		470	682.4	21.7865	5198.26	332.674		470	547.2	28.684	3428.28	330.8
471	273.1	9.43233	25742.4	27269.2	3047.19	17843.5		471	402.2	10.3911	120711	7774.12		471	555.5	20.5885	4986.93	484.484
472	555.2	9.43833	4732.99	0	3076.97	5908.97		472	273.2	9.032	6118.46	395.38		472	470.2	7.92433	16041.4	1564.26
473	321.2	9.4555	159.4	0	1656.08	2856.7		473	503.1	15.252	4697.31	305.655		473	537.4	25.1028	4217.53	412.14
474	442.3	9.4555	273.251	565.563	401.505	2297.86		474	509.3	11.852	7876.79	513.708		474	513.4	26.241	5570.3	569.021
475	466.1	9.46433	6920.29	8100.97	768.96	8805.56		475	378.2	30.0157	21843.2	1506.26		475	406.2	10.6611	18994.5	1946.8
476	555.3	9.46433	363.565	3972.96	0	2329.69		476	605.3	16.87	5612.81	394.314		476	284.9	15.2872	4312.18	453.505
477	366.9	9.4735	0	888.782	2212.8	5911.07		477	263.3	21.8509	4390.21	309.291		477	508.2	19.9513	3903.87	414.79
478	482.2	9.4735	0	0	937.32	5536.42		478	390.1	13.0367	4894.11	350.033		478	580.5	21.001	12394	1319.8
479	467.1	9.48283	9005.7	3981.46	774.86	3331.09		479	633.1	25.1708	6436.32	462.21		479	551.1	13.0092	7651.6	818.324
480	556.2	9.48683	3582.66	434.643	1344.51	0		480	479.2	15.0008	4154.71	301.04		480	394.2	26.3065	4444.87	484.327
481	508.3	9.48683	5216.54	1301.71	0	0		481	499.1	15.2873	2869.72	209.328		481	152	13.092	1986.66	218.378
482	364.1	9.49067	280.472	1340.91	1917	4909.65		482	293.3	15.731	2926.66	218.325		482	410.3	15.217	1050738	116238
483	508.2	9.49067	2146.66	0	1740.21	7694.03		483	317	17.6477	11314.8	860.8		483	397.2	18.9717	2532.81	281.161
484	484.1	9.49383	8399.95	4783.92	347.733	1820.28		484	444.3	8.532	2617.67	201.6		484	593.3	15.8953	4209.26	468.491
485	413.9	9.50467	3220.56	442.333	0	0		485	377.9	9.8925	3753.46	289.428		485	394	18.1965	8400.72	938.489
486	534.2	9.50717	4501.33	199.331	1296.38	6255.25		486	513.1	11.4068	9073.8	711.875		486	402.2	10.6482	44232.9	4965.06
487	554.2	9.50867	19880.9	14985.7	6413.43	13622.4		487	411.3	15.8018	3821.87	299.98		487	416.1	6.725	7585.85	851.841
488	556.3	9.50867	1050.04	848.267	1985.08	3546.03		488	459.2	14.9709	45461.8	3644.2		488	371.9	36.9205	2697.7	304.611
489	326.3	9.50883	961.704	1059.68	3256.33	2551.45		489	367.3	8.68767	176721	14212.5		489	357.2	6.16983	30141	3406.67
490	364	9.51617	4035.29	2054.31	5943.86	0		490	355.1	29.353	5055.16	419.116		490	295	15.4818	3968.71	449.606
491	482	9.5225	11462.2	2639.78	467.535	1385.49		491	781.3	10.4578	121007	10081.7		491	439.2	19.8311	34630	3989.92
492	483.1	9.5225	3723.78	223.918	711.42	1571.08		492	940.4	15.3587	49798.3	4196.18		492	543.5	21.579	2751.94	320.579
493	555.1	9.5225	7034.89	839.766	0	1532.24		493	152.3	8.49783	2999.09	254.933		493	472.1	7.82867	3521.95	411.745
494	911.3	9.5225	7434.77	898.95	705.191	3081.11		494	570.2	12.2292	14088.8	1201.52		494	455.2	13.8545	24546.6	2952.07
495	383.1	9.5225	2865.18	0	0	1902.72		495	467.1	9.48283	9005.7	774.86		495	433.2	13.8078	5474.28	658.317
496	445.1	9.52283	18637.9	27973	13198.1	8895.75		496	484.2	9.59525	3662.61	319.06		496	365.3	21.5047	3440.05	415.726
497	551.2	9.52683	730.687	2941.58	0	7032.04		497	385.4	12.4735	7245.84	638.4		497	393	29.2737	19032.6	2321.72
498	507.1	9.527	2974.66	9019.55	7548.26	8668.23		498	377.3	8.16767	3407.96	300.8		498	499.2	15.2347	9352.55	1154.75
499	426.1	9.529	18207.6	42898.3	18748.5	37932.8		499	940.4	15.0066	56080.7	5049.79		499	496.2	21.6937	3419.56	422.831
500	551.1	9.53375	3474.86	0	3130.11	0		500	497.2	8.30683	3615.67	328.423		500	939.4	15.0735	61530.9	7683.46
501	309.1	9.53717	1838.82	8475.76	7207.2	0		501	365.1	0.576333	63105.5	5765.91		501	493.4	24.4115	5142.85	646.204
502	444.1	9.53717	104638	87462.9	47265.3	54198.2		502	452.2	7.398	2812.18	258.64		502	371.1	5.59283	2507.66	322.999
503	910.2	9.53908	9820.53	17293.7	7752.48	4006.15		503	431.2	11.908	2002.34	186.375		503	471.1	7.383	202312	26422.8
504	393.2	9.53933	4887.66	1192.81	0	0		504	111.1	11.8643	5890.49	557.56		504	363.2	12.6202	2517.5	332.144
505	507.2	9.54233	34784.8	15397.7	9030.27	37088.8		505	911.3	9.5225	7434.77	705.191		505	394	3.02033	4115.21	544.395
506	427.1	9.544	6276.38	4029.13	9233.04	16507.6		506	466.3	17.3053	6878.9	656.703		506	471.3	22.802	5288.63	711.393
507	373.8	9.54692	2190.47	4282.4	2358.97	829.935		507	511.3	16.0883	13002.3	1242.67		507	323.4	7.51567	10530.8	1419.59
508	446.1	9.55567	13029.5	8454.54	1751.59	0		508	369.3	21.2688	12083.8	1177.25		508	570.2	12.6202	8406.86	1138.89
509	911.2	9.55567	3001.03	6976.59	1021.84	2158.62		509	782.3	10.4718	65655.8	6419.82		509	658.8	7.34283	3127	424.21
510	331.7	9.55567	0	3811.41	0	232.866		510	373	3.8195	5000.18	489.273		510	390.1	13.0367	1620.94	221.464
511	466.2	9.5565	18447.7	33747.7	9764.9	18596.9		511	373.2	43.9467	4533.22	453.68		511	205.1	0.594083	8280.38	1144.69
512	427.2	9.55708	11286.6	8098.26	3049	0		512	428.1	9.25933	7482.61	759.22		512	354.2	21.075	13698.1	1899.39
513	910.3	9.56217	15832.2	4625.76	4265.18	28217.2		513	430.3	24.4408	4095.95	417.64		513	659.8	7.34283	3617.17	504.32
514	329.6	9.56275	739.785	1195.65	4589.8	9183.97		514	325.3	6.7565	4251.31	435.585		514	421.2	10.7208	6646.98	931.425
515	348.2	9.563	748.388	217.125	3277.33	1483.59		515	939.4	15.0735	92331.3	9571.03		515	362.1	7.36033	9079.93	1278.44
516	467.2	9.57317	742.051	5712.79	3316.14	3110.15		516	367	9.25958	6580.76	684.99		516	349.2	17.4882	3584.21	506.976
517	508.1	9.57317	2136.36	5373.2	2423.31	903.634		517	381.1	0.523167	6125.32	641.448		517	374.1	10.219	2247.71	319.202
518	909.3	9.57317	63946.9	25619.8	20027.6	7242.24		518	598.1	13.0007	4810.49	510.171		518	301.2	17.219	181452	26101.2
519	534	9.5745	2564.14	3836.54	518.674	0		519	941.4	15.3768	9564.37	1017.6		519	101	0.5945	2121.96	307.213
520	350.2	9.57517	2314.36	526.306	329.085	0		520	297.7	10.4068	9304.69	992.172		520	337.1	20.1088	3022.16	443.18
521	330.4	9.58	0	0	2504.46	0		521	284	5.291	5366.85	574.292		521	460.2	4.5325	3668.98	538.871
522	909.2	9.58033	3144.47	13127	5749.67	48330.5		522	359.4	17.0617	4932.02	539.955		522	405.3	11.1727	3321.73	488.949
523	445.2	9.58667	30302.7	20951	17602	35050.9		523	494.1	13.8003	7936.35	877.92		523	289.1	9.337	4951.85	729.021
524	329.5	9.59167	407.133	2887.87	3973.51	2484.84		524	466.1	9.46433	6920.29	768.96		524	395.2	15.4818	3474.42	511.962
525	484.2	9.59525	3662.61	1697.68	319.06	7060.7		525	568.3	21.7523	9905.7	1107.7		525	431.2	11.908	4995.6	758.115
526	282.4	9.598	0	0	3342.69	0		526	612.3	14.1956	6404.15	716.455		526	443.2	7.4	2147.82	329.146
527	444.2	9.598	60325.8	29782.3	70935	80483.2		527	261.2	7.419	4108.8	463.406		527	286.4	22.7712	3216	494.33
528	482.1	9.5985	1105.05	2983.5	3151.91	10435.9		528	548.3	28.3245	3431.22	391.131		528	538.4	25.1717	3509.09	541.582
529	509.1	9.5985	0	1870	0	2357.08		529	526.4	28.2937	141892	16251.9		529	379.2	28.4847	9865.98	1543.69
530	426.2	9.60717	23328.2	15545.4	23142.6	42532.9		530	586.2	12.0385	79901.2	9204.71		530	151.9	13.4106	3570.14	565.224
531	306	9.61567	0	0	0	3396.89		531	469.2	24.5325	8725.01	1011.84		531	359	9.337	3830.11	607.994
532	446.2	9.61567	1462.84	2147.45	3405.87	11081.2		532	371	26.754	8317.92	971.52		532	402.2	10.3911	27907.4	4495.76
533	426	9.62767	16008.8	0	0	0		533	273.1	9.43233	25742.4	3047.19		533	553.2	25.107	2240.65	363.538
534	393.1	9.63383	12272.4	5321.38	12517.7	14239.8		534	373	13.3638	3735.94	444.05		534	382.2	11.3705	6290.52	1022.12
535	383.2	9.634	4583.83	5018.74	9518.83	6822.29		535	552.3	11.4911	6584.89	794.082		535	718.8	15.2525	5122.47	835.276
536	861.3	9.64567	7613.73	2752.25	0	0		536	528.3	15.0363	2857.99	349.236		536	482.2	15.323	271014	44235.6
537	468.2	9.64842	10855.3	5651.77	4908.68	6532.43		537	360.3	29.6672	16828.8	2106.57		537	348.1	8.074	16381.5	2701.86
538	373.3	9.66067	884.158	0	3859.75	3710.43		538	327.2	23.2482	26088.1	3284.15		538	321.3	16.7327	4916	813.06
539	396.2	9.66467	22038	8086.85	0	708.292		539	495.3	26.1115	2982.09	378.048		539	370.9	19.3822	6992.83	1157.99
540	690	9.6805	2540.82	0	0	0		540	569.3	13.1691	6249.94	796.62		540	570.3	14.2412	10151.6	1698.27
541	910.1	9.6805	3546.76	0	1036.99	512.206		541	414.1	10.5132	4000.14	510.171		541	404.1	7.51567	4726.54	794.023
542	856	9.68317	0	2722.08	0	0		542	378.4	27.6528	14021.2	1789.04		542	467.2	9.57317	5373.2	903.634
543	364.2	9.705	345.98	499.374	4693.48	3110.47		543	567.3	15.3938	5648.97	728.029		543	454.2	7.43658	199169	33831.9
544	507	9.71917	0	7516.53	0	0		544	340.2	12.4918	15425.3	1992.9		544	359.3	10.325	6474.17	1101.8
545	445.1	9.722	4911.46	0	6220.03	3050.75		545	483.2	22.0323	8320.69	1078.08		545	337.2	5.05767	2038.7	349.287
546	305.3	9.73317	4117.29	0	0	285.472		546	279.3	15.6602	3292.5	430.36		546	579.3	19.7572	2997.16	513.714
547	282.3	9.74	0	0	2307.62	0		547	607.2	12.0743	23307.5	3053.87		547	371	13.0967	3261.4	560.373
548	152	9.74	0	0	2903.34	1263		548	293.3	6.29867	4149.25	545.868		548	319.2	17.8208	2918.22	507.705
549	508.2	9.75933	3760.65	1702.18	3877.3	6787.41		549	372	29.3285	2787.8	367.82		549	580.4	21.075	3387.7	589.555
550	396.9	9.78583	2733.67	0	0	285.652		550	434.1	9.9275	14848.3	1976.64		550	313.1	6.34283	5175.47	907.998
551	457.3	9.79583	0	0	233.235	2137.07		551	441.1	18.0148	5592.32	746.565		551	367.3	8.68767	2017.53	355.041
552	396	9.811	0	663.913	2723.14	515.072		552	495.4	13.0946	4966.09	663.52		552	303.1	17.2022	4928.82	875.95
553	507.3	9.83967	3952.77	0	0	0		553	446.1	9.55567	13029.5	1751.59		553	874.2	7.36033	3742.93	665.454
554	477.2	9.86533	1563.39	5035.44	777.226	3608.19		554	297.8	10.656	4166.23	561.067		554	371	29.679	2751.56	491.514
555	547.2	9.86533	13882.9	18681.7	6727.67	5931.27		555	541.3	24.2888	4333.28	593.808		555	373.2	43.9467	3651.98	657.332
556	476.2	9.867	13051.9	13112.3	2448.97	10239.8		556	428.1	15.0638	4857.98	666.411		556	445	12.381	2160.01	390.022
557	359.1	9.867	11850.2	0	0	10856.9		557	380.2	21.7032	8479.26	1170.44		557	403.1	8.535	21830.4	3951.85
558	547.3	9.87825	17499.9	4060.71	11953.6	18025.5		558	421.1	7.3845	5072.76	708.225		558	409.3	15.482	2236.04	405.438
559	477.1	9.882	1155.14	0	2744.34	0		559	436.1	10.5847	4956.04	699.048		559	223.1	18.9923	7450.78	1353.62
560	549.1	9.88533	269.398	253.479	0	4078.08		560	377.3	27.6682	63037.5	8908.51		560	308.1	9.00967	3278.88	595.957
561	498.2	9.88675	6229.01	2723.5	3085.61	1081.84		561	350.2	9.57517	2314.36	329.085		561	284	5.291	11438.1	2101.58
562	377.9	9.8925	3753.46	0	289.428	0		562	612.1	14.547	1404.33	200.34		562	414.2	25.7467	2098.29	387.175
563	382.3	9.8925	2992.7	0	1106.54	0		563	527.4	28.5573	40966.1	5896.43		563	373.2	42.795	1622.3	299.487
564	476.3	9.9095	7215.41	0	0	0		564	782.4	10.413	19204.5	2801.36		564	883.3	7.3945	48445.4	8966.4
565	514.2	9.9095	4054.45	0	0	0		565	319.2	12.328	11282.7	1660.97		565	434.2	6.3945	11555	2155.6
566	434.1	9.9275	14848.3	621.2	1976.64	2147.01		566	368.3	16.5169	7175.97	1071.48		566	371	26.754	6454.24	1208.8
567	548.3	9.9275	5758.93	380.172	0	0		567	432.1	8.14467	3170.65	478.06		567	394.1	6.75417	19950.9	3758.3
568	526.2	9.95683	0	2750.1	1353.62	1389.68		568	305.3	23.2572	5247.58	791.345		568	622.4	17.914	10539.6	1992.48
569	434.2	9.95733	1868.34	14518.1	812.023	3664.31		569	297.2	15.43	3270.61	497.417		569	317.2	2.881	1019.75	193.193
570	261	9.9575	1131.95	1407.84	0	3191.23		570	152.1	19.6128	3000.86	457.92		570	721.9	15.1267	5700.1	1080.71
571	392.9	9.97583	0	0	0	6125.25		571	111	12.3175	2149.09	328.6		571	293.3	14.968	940.711	178.94
572	549.2	9.97583	1705.85	770.179	5731.64	6804.41		572	463.2	8.30683	4142.86	634.014		572	498.3	15.4559	9933.4	1891.22
573	458.2	9.988	236.294	175.477	3797.59	2152.99		573	437.2	18.4602	5449.01	851.2		573	455.1	7.377	5158.02	988.06
574	548.2	9.988	2893.03	3831.09	6201.6	3914.73		574	371	15.1085	15297.7	2404.29		574	152.2	7.11883	5375.06	1030.76
575	525.3	9.99308	18448.8	4735.56	8561.21	10255.9		575	557.4	9.364	4128.7	650.945		575	439.2	15.9284	3696.82	709.511
576	326.3	10.006	1179.22	351.951	3764.06	0		576	551.1	13.0092	7468.83	1179.57		576	373.8	9.54692	4282.4	829.935
577	525.2	10.0173	0	3218.23	9312.36	9148.34		577	260.9	15.8953	1882.36	298.292		577	413.2	25.709	23255.1	4507.97
578	475.2	10.0483	0	0	0	2803.4		578	617.3	16.6782	3963.04	637.398		578	461.3	14.9917	3331.32	647.876
579	549.3	10.0483	0	1577.41	0	7639.47		579	311.3	9.137	3717.71	602.79		579	432.1	8.14467	6754.23	1317.65
580	325.3	10.0552	8565.86	3002.38	15901.4	2650.23		580	460.2	15.0363	27493.9	4469.58		580	455.2	8.145	37950.4	7418.94
581	526.3	10.059	2944.45	2213.94	5071.42	637.189		581	280	0.647333	8950.89	1457.98		581	374.9	19.984	1273.06	248.797
582	326.2	10.0657	1064.98	2067.9	1237.63	3764.26		582	549.2	15.1267	3029.33	496.29		582	552.4	11.4777	2627.28	521.831
583	325.2	10.0843	14287.8	21557.1	14151.2	16941.5		583	393	14.9102	10841.7	1791.98		583	635.3	10.3887	2311.03	460.045
584	359.1	10.112	4130.87	999.449	8814.96	3138.93		584	652.3	11.1644	8512.54	1408.74		584	437.3	25.727	2571.79	512.32
585	476.1	10.1748	0	2494.85	320.565	0		585	961.4	15.2525	9437.86	1566.74		585	509.3	15.9138	52776.8	10657.5
586	548.3	10.2016	3977.6	11693.6	2961.75	3495.78		586	219	0.557333	3298.3	553.8		586	483.2	15.252	8972.85	1824.72
587	374.1	10.219	1205	2247.71	5283.81	319.202		587	428.3	10.9492	12571	2129.45		587	425.3	10.4122	6524.93	1329.8
588	261	10.254	2227.71	0	2562.91	1106.23		588	381.2	10.436	53655.1	9133.45		588	455.3	22.7975	9145.85	1865.66
589	471.2	10.2848	653.501	3343.91	0	1009.43		589	429.1	7.50667	3274.2	557.568		589	496.4	25.904	1118.51	230.655
590	359.3	10.325	2368.7	6474.17	4710.64	1101.8		590	359.1	16.1888	5541.85	951.045		590	631.3	15.0772	4005.86	827.756
591	811	10.3355	3773.6	362.112	0	0		591	639.4	16.556	8882.43	1527.16		591	781.3	10.4578	104447	21613.4
592	542.1	10.3707	9221.73	0	0	0		592	350.3	10.7627	9655.8	1672.04		592	599.3	13.4518	9575.28	1983.06
593	470.2	10.3707	4703.6	1628.55	1142.68	1338.12		593	484.2	9.207	5171.82	897.82		593	437.3	14.5298	4194.13	870.942
594	543.2	10.3753	1469.54	5314.06	1071.66	2378.86		594	432	7.24467	4455.5	784.31		594	324.1	7.46383	4427.62	926.862
595	635.3	10.3887	3650.4	0	0	0		595	377.3	28.5922	24477.9	4350		595	414.3	25.6175	6680.7	1403.37
596	289.6	10.3887	3299.78	585.731	184.8	736.711		596	568.4	25.631	4476.78	797.685		596	110.9	39.0197	3775.93	794.617
597	382.1	10.3887	4115.23	2311.03	0	460.045		597	628.5	21.635	6701.31	1205.58		597	527.4	14.968	4189.72	882.669
598	402.2	10.3911	120711	27907.4	7774.12	4495.76		598	606.2	12.0797	60476	10904.5		598	324.1	13.3958	4078.43	876.934
599	419.9	10.4068	3012.52	0	0	0		599	600.4	21.709	10223.9	1844.58		599	461.2	15.2002	7489.08	1638.76
600	297.7	10.4068	9304.69	2414.64	992.172	0		600	366.3	21.585	9256.5	1672.04		600	451.4	21.4185	5648.97	1244.85
601	520.2	10.4068	10555.8	3252.08	5268.93	1444.83		601	524.4	28.6013	23017.5	4209.26		601	470.3	15.0547	891.797	196.59
602	381.1	10.4098	16994.2	0	11589.9	10074.5		602	592.3	15.9817	25130	4595.79		602	451.1	7.37242	20385.6	4496.28
603	425.3	10.4122	2472.68	6524.93	468.342	1329.8		603	460.3	15.2253	33881.9	6199.73		603	316.1	7.40133	16385.3	3624.79
604	782.4	10.413	19204.5	5395.06	2801.36	1540.26		604	317.3	20.3482	9651.81	1776.56		604	769.4	8.44533	7510.38	1663.2
605	770.4	10.4238	3700.06	0	179.424	0		605	476.2	9.867	13051.9	2448.97		605	400.2	8.26025	3009.62	666.649
606	381.2	10.436	53655.1	55994	9133.45	13973.4		606	261	3.434	3370.8	632.544		606	451.2	7.40133	83548.8	18513.2
607	783.3	10.436	20118.8	9926.92	504.231	597.739		607	297.1	18.0865	2696.47	508.25		607	395	0.5945	3325.82	745.518
608	399.1	10.442	5462.02	529.842	1305.92	0		608	585.2	12.1893	270382	51182.8		608	510.3	15.9603	13574.5	3045.09
609	418.2	10.4482	2758.87	22642.6	7260.44	6391.59		609	425.3	10.4122	2472.68	468.342		609	419.2	10.4543	5007.93	1125.21
610	380.2	10.4486	223092	217537	75206.7	109353		610	152.2	8.56717	3766.72	715.5		610	979.7	10.7627	1516.6	341.142
611	403.1	10.449	17899.7	9516.42	10558.4	4758.07		611	566.2	15.1303	3034.25	576.666		611	394.2	8.64567	16317.9	3698.32
612	419.2	10.4543	6334.56	5007.93	0	1125.21		612	483.1	9.5225	3723.78	711.42		612	507.3	19.9333	11038.9	2509.12
613	781.3	10.4578	121007	104447	10081.7	21613.4		613	597.3	22.7785	6443.25	1242.72		613	376.2	26.2887	15216.7	3468.84
614	520.3	10.4659	0	5972.52	440.538	7333.09		614	335.2	11.7383	2179.33	420.82		614	347.3	16.4912	6204.65	1423.7
615	782.3	10.4718	65655.8	37453.9	6419.82	15541.8		615	497.2	14.9981	51433.8	9992.73		615	910.2	9.53908	17293.7	4006.15
616	402.1	10.4852	59325.1	64798.9	20899.8	49116.7		616	456.3	13.9633	4620.76	900.834		616	888.2	7.377	42196.5	9941.48
617	382.2	10.4905	5553.43	9631.23	1727.7	907.753		617	407.3	21.6852	4459.42	873.6		617	569.2	13.167	7153.61	1689.09
618	403.2	10.4938	6555.96	11032.5	1322.18	5652.02		618	324.1	7.46383	2813.38	553.8		618	781.4	10.6482	9759.66	2330.38
619	783.4	10.5116	2053.72	4112.06	1099.08	3148.2		619	279.1	20.3127	11494.5	2275.58		619	483.1	21.953	4591.33	1101.66
620	297.6	10.5132	4705.34	2066.24	1202.78	2395.22		620	543.2	8.68767	9087.43	1800.09		620	770.6	15.0902	1577.76	380.075
621	412.2	10.5132	8824.6	3628.91	327.291	1163.68		621	395	11.695	3256.09	645.333		621	538.3	25.213	2480.04	600.118
622	414.1	10.5132	4000.14	291.306	510.171	617.937		622	676.5	21.774	2834.44	561.8		622	449.4	28.687	1805.32	438.015
623	558.1	10.5382	0	628.442	1577.28	3737.01		623	241.1	5.7875	3264.88	647.52		623	416.2	13.6567	6732.93	1634.58
624	418.1	10.5395	39532	6308.68	8301.67	5492.62		624	369.3	21.5917	6407.14	1277.55		624	152.2	19.293	2885.79	704.001
625	547.1	10.5567	681.663	1720.08	0	5004.14		625	403.2	10.4938	6555.96	1322.18		625	261.2	37.9395	4875.42	1197.99
626	412.3	10.558	0	2551.45	0	0		626	534	9.5745	2564.14	518.674		626	523.1	20.0263	1010.3	248.39
627	513.2	10.5646	940.386	0	10969.1	8006.5		627	337.2	5.05767	3709.96	750.834		627	783.3	10.436	55994	13973.4
628	436.1	10.5847	4956.04	4113.09	699.048	2450.93		628	452.2	15.6557	20697	4198.38		628	303.3	21.556	3139.27	783.692
629	297.4	10.6123	0	5301.5	185.5	0		629	433.2	13.8078	2917.78	595.72		629	887.3	7.36392	48111.3	12021.9
630	831.3	10.6378	2383.94	0	0	0		630	318.1	17.271	12870.4	2642.23		630	373.1	18.0908	4056.62	1022.51
631	414.2	10.644	1502.62	2027.5	4411.23	1600.1		631	655.3	15.4832	7575.34	1560.87		631	434.2	9.95733	14518.1	3664.31
632	402.2	10.6482	17237.3	44232.9	7018.14	4965.06		632	495.2	21.721	7759.92	1608.53		632	570.3	12.363	16558.8	4181.88
633	781.4	10.6482	72698.8	9759.66	1140.62	2330.38		633	498.1	14.967	6962.56	1451.45		633	245	41.3005	5592.68	1412.96
634	297.8	10.656	4166.23	476.724	561.067	1356.81		634	321.2	16.5508	6636.32	1387.33		634	620.2	13.3602	4102.2	1038.29
635	406.2	10.6611	6302.27	18994.5	2389.86	1946.8		635	418.1	10.5395	39532	8301.67		635	559.3	22.766	15004.7	3804.74
636	405.2	10.6742	74883.3	22472.3	49803.7	15922.8		636	308.2	6.29867	4037.41	849.24		636	584.2	12.1745	887536	225492
637	381.3	10.679	0	0	4189.78	0		637	337.1	15.2703	10982.6	2313		637	377.3	27.6682	12394.1	3150.67
638	553.3	10.679	175.756	0	3192.25	4129.65		638	460.2	15.3407	22714.3	4812.62		638	535	0.576167	2900.54	739.765
639	277.1	10.6822	739.466	2843.98	3348.03	1560.42		639	368.1	8.946	3034.67	642.96		639	377.2	7.78483	1368.72	349.377
640	110.9	10.6912	2797.34	0	0	0		640	365.2	21.5618	25397.7	5452.96		640	285.1	22.643	2458.23	630.733
641	421	10.6912	3345.36	0	0	0		641	311.2	9.207	7798.49	1697.61		641	479.2	21.6624	4286.3	1099.84
642	406	10.697	2810.48	0	4389.48	1397.19		642	205.1	17.2105	15436.4	3379.94		642	416.2	4.21908	3813.88	997.418
643	976.5	10.7023	0	3030.54	0	0		643	470.8	15.0547	5650.04	1251.04		643	481.2	15.217	3312.94	869.294
644	928.1	10.7027	0	0	0	3081.42		644	281.2	16.6238	2571.7	570.84		644	259.2	35.5772	7249.45	1903.37
645	405.1	10.7205	0	66231.6	7971.53	25307.5		645	484.2	8.3245	5348.76	1189.15		645	940.4	15.0066	31780.9	8371.88
646	421.2	10.7208	3797.15	6646.98	1108.36	931.425		646	439.2	15.9284	4982.07	1115.12		646	206.2	0.665167	2638.62	697.592
647	585.1	10.733	0	0	3427.21	0		647	409.3	23.9153	892.828	205.078		647	498.2	11.4605	1807.74	487.788
648	395.2	10.7387	0	0	375.936	2990.26		648	466.3	23.7735	1024.27	235.498		648	622.3	17.5311	23843	6434.62
649	367.2	10.739	3505.35	12553	9891.92	28241.7		649	735.3	6.25583	3300.5	762.069		649	851.4	13.6548	11650	3163.74
650	781.2	10.7447	3387.7	0	0	0		650	430.2	24.3772	2079.38	480.18		650	484.4	18.6562	4608.55	1253
651	553.2	10.75	196.97	0	3333.45	1234.19		651	248	21.7013	3519.12	820.224		651	319.3	16.4778	2610.78	712.906
652	368.3	10.7505	4888.72	3101.01	2294.9	6530.19		652	341.2	21.6168	4034.22	940.395		652	349.1	36.716	1058.36	289.426
653	261	10.7567	3824.57	4343.82	2536.83	3413.99		653	467.3	24.5059	45681.6	10671.5		653	321.2	16.5508	6040.39	1662.16
654	406.3	10.7572	0	0	0	3316.27		654	639.2	15.6067	2509.08	588.823		654	546.4	28.6611	33777.1	9380.39
655	979.7	10.7627	2214.34	0	0	0		655	609.3	14.1343	4303	1016.33		655	548.3	12.1038	13095.7	3646.97
656	350.3	10.7627	9655.8	1516.6	1672.04	341.142		656	371.2	17.0583	7507.33	1780.42		656	542.2	8.609	17862.2	4991.33
657	368.2	10.7786	6085.6	10543.5	1844.98	5255.49		657	358.2	21.7327	4758.42	1132.08		657	874.8	7.377	3530.67	986.744
658	394.1	10.786	3178	563.712	2975.42	461.364		658	285.2	22.7384	12619.5	3010.4		658	547.6	23.1577	4138.86	1161
659	513.1	10.803	0	0	2201.15	719.686		659	279.1	16.4338	6118.88	1460.87		659	882.3	7.34283	21390.5	6010.86
660	367.3	10.8118	29858.5	16544.9	14105.9	7096.7		660	399.1	10.442	5462.02	1305.92		660	600.5	19.7163	675.064	190.388
661	259.1	10.8162	8726.32	6000.09	3197.92	2744.33		661	325.2	6.6425	33211.1	8030.29		661	418.2	10.4482	22642.6	6391.59
662	352.1	10.8342	3557.1	1700.73	0	2025.72		662	378.3	20.2313	6957.64	1684.83		662	508.1	9.57317	25619.8	7242.24
663	428.2	10.9202	0	3786.78	2247.94	2546.83		663	470.2	10.3707	4703.6	1142.68		663	482.2	21.9362	16293.6	4641.55
664	542.1	10.924	6544.01	0	0	0		664	370.1	5.05758	8797.79	2137.45		664	574.2	7.52092	5448.4	1553.91
665	352	10.9385	0	2281.25	170.4	0		665	259.1	13.0797	15167.8	3716.93		665	428.3	10.9492	5148.58	1469.55
666	937.1	10.9412	2511.29	0	0	0		666	377.2	7.78483	6576.82	1614.14		666	219	0.557333	1066.09	304.299
667	450.2	10.9412	5730.3	1017.14	0	1046.57		667	346.3	16.4361	64008.6	15712.2		667	782.4	10.413	5395.06	1540.26
668	428.3	10.9492	12571	5148.58	2129.45	1469.55		668	468.3	13.7728	6287.86	1553.75		668	356.3	19.9163	5105.76	1468.06
669	521.2	10.9742	2765.04	3492.55	0	209.283		669	455.1	8.13333	12294.9	3065.07		669	526.3	10.059	2213.94	637.189
670	405.1	10.9957	9380.65	2823.27	5528.53	0		670	481.4	23.244	3543.75	890.674		670	275	7.55083	2580.5	747.896
671	582.4	10.9957	2927.68	0	0	398.888		671	428.2	15.072	14039.5	3538.72		671	284.3	23.3245	33081.2	9632.22
672	542.2	11.0314	4415.38	8760.49	9682.98	4278.1		672	593.3	15.8953	2324.28	587.127		672	369.1	17.9363	5011.89	1460.04
673	521.3	11.0648	0	2459.2	1053.05	0		673	394.2	8.64567	15405.8	3929.07		673	362.3	26.152	1227.45	363.655
674	375.3	11.0672	5395.54	0	194.503	208.431		674	297.6	10.5132	4705.34	1202.78		674	152.1	18.9393	8275.92	2471.34
675	404.9	11.087	978.359	0	4092.66	0		675	692.5	23.349	5737.36	1473.96		675	548.3	10.2016	11693.6	3495.78
676	259.2	11.1188	502.078	4273.49	931.74	1420.16		676	382.2	11.3705	1240.08	318.6		676	428.3	15.3398	2494.85	745.882
677	223.2	11.14	1955.29	281.636	2541.88	420.527		677	581.4	17.5118	1143.55	294.624		677	316.2	2.88225	10822.4	3253.79
678	527.2	11.1582	0	0	1999.16	4798.62		678	507.2	9.54233	34784.8	9030.27		678	471.2	10.2848	3343.91	1009.43
679	652.3	11.1644	8512.54	11579.7	1408.74	331.684		679	377.2	29.813	24885.8	6580.27		679	396.1	8.233	6479.79	1962.77
680	405.3	11.1727	0	3321.73	462.343	488.949		680	393.2	41.2093	7452.05	1980.8		680	245	38.5428	1688.82	516.204
681	390.2	11.1743	4190.65	2202.37	0	0		681	395.2	6.73983	3668.87	980.267		681	413.3	7.48133	3291.95	1012.73
682	415.1	11.1767	380.279	201.044	848.169	8920.11		682	910.3	9.56217	15832.2	4265.18		682	393	41.926	1676.54	516.626
683	372.2	11.2093	0	3697.42	0	0		683	397.3	23.8138	2020.05	545.246		683	711.6	22.7424	6335.89	1953.18
684	556.1	11.2808	4104.93	3280.62	0	0		684	427.2	9.55708	11286.6	3049		684	331.7	9.55567	6976.59	2158.62
685	556.3	11.282	611.424	2712.54	4940.42	7152.95		685	598.3	13.3465	44556.1	12043		685	317.1	7.86417	4739.03	1468.41
686	528.1	11.2855	0	0	616.92	4809.8		686	609.2	14.0733	2550.38	692.25		686	338.4	26.1479	169400	52622.6
687	527.3	11.2918	0	0	3639.76	8179.81		687	275.1	12.2378	6488.18	1777.34		687	416.2	6.79133	2573.88	800.707
688	437	11.2985	0	2957.4	1953.37	1653.01		688	570.3	14.2412	9859.06	2707.23		688	617.2	15.2002	5948.82	1851.37
689	436.1	11.3213	3745.66	21431.7	14519.1	15702.2		689	570.3	11.9945	15977.3	4399.87		689	241.1	5.32633	7039.65	2195.16
690	436	11.335	6112.91	0	0	0		690	406.4	12.6732	1123.91	309.847		690	432.2	8.41067	1344.34	422.662
691	904.6	11.335	0	2467.42	0	0		691	554.4	20.9902	5263.11	1454.79		691	377.3	28.5922	6095.13	1931.16
692	426.1	11.3442	4396.01	3661.78	1597.25	0		692	578.4	19.7493	17179.3	4770.86		692	477.2	9.86533	18681.7	5931.27
693	557.1	11.353	0	0	3014.26	483.545		693	381	0.541167	5689.9	1584.5		693	205	17.6325	1632.59	518.915
694	572.3	11.3582	0	0	0	2550.24		694	152.1	1.89067	8801.75	2457.58		694	445.1	9.52283	27973	8895.75
695	382.2	11.3705	1240.08	6290.52	318.6	1022.12		695	419.4	26.6675	8810.02	2478.28		695	691.5	23.3023	6559.33	2087.84
696	426.2	11.3767	1921.13	1199.67	897.795	5747.33		696	359.2	29.7093	50716.9	14349.3		696	468.3	5.548	3323.42	1057.95
697	436.2	11.3911	0	3129.22	5003.33	10392.1		697	554.2	14.2368	43466.6	12372.4		697	373.2	7.2395	8528.4	2716.95
698	260.9	11.3942	0	2957.13	0	2601.65		698	497.3	11.496	20816.8	5927.52		698	297.6	10.5132	3628.91	1163.68
699	437.2	11.4068	639.651	2861.17	492.768	1686.18		699	152.1	18.1297	2303.68	657.105		699	430.2	5.504	13266.7	4267.3
700	513.1	11.4068	9073.8	1528.7	711.875	3289.07		700	515.4	14.6923	2925.25	837.09		700	606.2	12.0797	45114.7	14513.3
701	452.2	11.4068	164.93	2646.5	0	0		701	534.2	9.50717	4501.33	1296.38		701	378.3	25.904	3110.64	1002.25
702	552.2	11.4068	3029.92	1716.06	0	0		702	462.2	8.37592	14790.7	4286.45		702	378.3	20.4333	2575.56	832.261
703	451.2	11.4125	0	0	0	2408.74		703	277.2	8.9285	5062.39	1470.18		703	301.1	26.2542	2961.12	958.046
704	309.2	11.4125	4544.96	2411.9	3333.12	6093.39		704	421.2	10.7208	3797.15	1108.36		704	453.3	20.5538	9711.65	3144.91
705	574.2	11.424	0	2737.92	0	1016.05		705	562.3	13.044	735.43	214.668		705	301	22.9865	3340.7	1087.18
706	475.3	11.459	403.738	2003.64	3243.35	1207.67		706	910.1	9.6805	3546.76	1036.99		706	438.2	13.6568	30103.4	9801.7
707	498.2	11.4605	7725.21	1958.9	2377.32	3891.37		707	320.2	12.3822	2908.82	850.662		707	606.3	12.008	17465.9	5693.95
708	574.3	11.4605	4013.1	1807.74	0	487.788		708	396.2	8.29767	19359.9	5663.9		708	111.2	42.511	878.046	288.003
709	552.4	11.4777	0	2627.28	943.59	521.831		709	295.2	15.3577	3145.98	928.092		709	419	8.1805	2859.09	939.064
710	552.3	11.4911	6584.89	2656.89	794.082	7484.93		710	437.3	18.391	759.717	224.082		710	479.2	15.0008	2678.59	880.83
711	497.3	11.496	20816.8	9445.66	5927.52	0		711	427.3	14.8977	2767.13	818.985		711	285.2	22.7384	14999	4935.32
712	429.2	11.5076	1143.24	0	15873.5	6473.6		712	283.2	21.5212	4664.04	1399.72		712	359.3	5.20083	3912.48	1289.62
713	498.3	11.5142	0	5781.14	925.485	337.273		713	368.2	10.7786	6085.6	1844.98		713	554.5	20.729	6707.69	2226.08
714	371.9	11.5323	0	6230.47	1718.26	0		714	507.3	19.9333	3175.63	966.799		714	259.2	11.1188	4273.49	1420.16
715	497.2	11.5437	7569.94	6646.16	5103.54	19239.2		715	498.2	11.4605	7725.21	2377.32		715	205	17.308	7578.26	2532.52
716	513.2	11.5863	5447.47	3758.17	1783.72	1484.05		716	465.4	24.8445	3176.78	980.673		716	532.2	14.2077	3904	1312.07
717	513.3	11.5935	0	1585.48	677.34	2679.46		717	379.3	16.2412	2881.39	892.08		717	380.3	24.4292	6040.39	2053.84
718	852.9	11.6228	2274.76	0	0	0		718	382.2	10.4905	5553.43	1727.7		718	217.1	36.733	1735.53	591.367
719	335.1	11.6477	542.619	2383.21	879.54	5539.29		719	455.2	13.8545	45974.4	14324.3		719	446.2	9.297	7887.46	2692.12
720	359	11.666	0	0	0	2712.72		720	909.3	9.57317	63946.9	20027.6		720	307.2	9.09258	37064.7	12669.7
721	295.2	11.666	529.404	1521.49	0	2511.94		721	728.5	22.742	6030.02	1913.43		721	569.4	21.4733	27474.9	9437.51
722	392.9	11.693	0	6536.16	568.71	0		722	627.4	21.526	21249.7	6744.78		722	453.3	15.855	5633.02	1948.92
723	395	11.695	3256.09	0	645.333	248.652		723	259.2	13.141	8008.3	2544.96		723	613.3	13.5527	2724.48	943.781
724	392.7	11.72	0	0	0	2322.9		724	470.9	8.23717	2152.13	689.055		724	578.4	19.7493	11296.5	3975.79
725	441.7	11.7293	0	2572.11	0	0		725	554.2	9.50867	19880.9	6413.43		725	941.4	14.9567	6190.08	2178.77
726	335.2	11.7383	2179.33	1949.87	420.82	4106.88		726	465.3	17.2357	5909.49	1917		726	412.4	17.397	1246.48	439.209
727	436	11.749	4507.58	0	0	2775.8		727	322.1	5.33492	12998.7	4226.5		727	523.3	24.1762	112982	39826.3
728	261.2	11.7647	1837.11	2283.07	1242.86	1190.73		728	559.3	22.766	12479.3	4072.57		728	609.3	14.1343	4930.13	1747.37
729	509.2	11.8182	2534.89	5699.62	11434.1	3454.29		729	469.2	13.3095	4633.39	1513.37		729	511.3	16.0883	8745.78	3109.17
730	547.1	11.8182	0	5507.73	1116.01	493.236		730	513.2	11.5863	5447.47	1783.72		730	359.3	14.5835	4368.08	1561.08
731	532.2	11.8233	2735.41	6091.63	2544.28	3354.59		731	504.2	15.3235	6803.31	2227.75		731	111	36.822	1693.23	608.096
732	531.3	11.8288	23308.3	28834.9	1459.67	18592.2		732	600.2	13.4125	3701.65	1212.27		732	459.2	15.3143	83956.6	30186.4
733	533.2	11.8288	220.571	0	1516.8	4534.74		733	997.3	13.211	31828.6	10468.1		733	337.1	15.2703	9612.48	3468.86
734	547.3	11.8343	7195.5	2873.4	3313.56	3749.33		734	412.2	22.7528	1398.11	463.22		734	385.4	12.4735	2740.82	989.8
735	532.3	11.8392	1492.93	0	2674.27	8105.55		735	389.2	13.1463	17509.9	5859.68		735	277.1	8.882	4229.11	1537.25
736	509.3	11.852	7876.79	0	513.708	8578.58		736	394.2	5.18317	5443.21	1822.14		736	495.3	21.9185	4520.33	1651.49
737	111.1	11.8643	5890.49	1344.15	557.56	3827.45		737	380.2	10.4486	223092	75206.7		737	322.1	5.33492	12740.2	4661.99
738	509.1	11.8898	0	4220.83	0	0		738	565.4	23.1955	6668.46	2254.49		738	281.3	7.498	2462.93	902.498
739	548.4	11.8998	0	0	0	3036.66		739	205.2	17.2748	3348.31	1132.08		739	652.4	13.1643	9178.54	3381.31
740	531.2	11.9053	3298.04	2969.04	22376.8	4104.04		740	468.2	21.3497	3222.16	1091.88		740	885.2	7.38583	129206	47724.8
741	431.2	11.908	2002.34	4995.6	186.375	758.115		741	453.3	15.855	19838	6751.13		741	341.1	21.544	2518.13	931.302
742	373	11.912	4323.74	1377.39	0	0		742	911.2	9.55567	3001.03	1021.84		742	574.2	11.424	2737.92	1016.05
743	882.9	11.9262	0	2436.39	0	0		743	412.2	7.55867	5100.14	1739.56		743	316	7.44092	61960.5	23088
744	548.2	11.955	3710.67	521.349	5196.31	0		744	497.2	15.3067	52360.2	17865.4		744	751.4	6.12083	4258.12	1586.69
745	549.3	11.9835	4567.54	1120.63	0	663.245		745	434.2	6.3945	4169.35	1424.97		745	318.2	12.5083	14614.4	5453.02
746	570.3	11.9945	15977.3	29271	4399.87	249.903		746	110.9	39.0197	1822.66	626.58		746	372.2	39.286	1948.7	732.201
747	499.2	11.9967	0	3241.38	0	0		747	307.2	9.09258	51393.8	17933.5		747	281.6	7.30767	3352.45	1261.02
748	606.3	12.008	15339.3	17465.9	489.9	5693.95		748	402.1	10.4852	59325.1	20899.8		748	616.4	15.412	716.195	269.837
749	920.3	12.008	0	0	878.983	8642.47		749	470.2	7.92433	7827.75	2762.36		749	282.3	21.5063	45243.3	17139.1
750	566.1	12.0202	3937.82	0	0	0		750	534.5	26.374	13651	4824.34		750	484.1	9.49383	4783.92	1820.28
751	647.3	12.0202	5117.68	349.044	0	0		751	600.5	19.7163	4781.06	1700.13		751	434.3	6.426	858.07	326.846
752	903.3	12.035	0	0	464249	484212		752	313.2	25.2395	5090.12	1810.5		752	541.2	24.167	748.308	285.155
753	463.2	12.0352	0	0	202831	351213		753	372	36.7638	9466.3	3386.72		753	373	13.3638	1178.06	449.296
754	626.8	12.0385	2243.87	0	0	0		754	420.4	22.2835	1491.58	534.617		754	554.3	14.3988	67837.5	25893.1
755	586.2	12.0385	79901.2	37606.2	9204.71	14814.9		755	509.3	15.9138	46948.9	16953.8		755	405.1	10.7205	66231.6	25307.5
756	441.2	12.0437	1078.11	0	1.19992e+07	1.35952e+07		756	477.3	12.7093	5367.6	1938.74		756	437.2	23.867	4814.08	1850.51
757	442.2	12.0437	372.702	0	3.73251e+06	4.25392e+06		757	293.2	15.072	6199.58	2252.45		757	465.4	24.8445	5112	1969.87
758	904.4	12.0442	0	0	361354	368684		758	426.1	11.3442	4396.01	1597.25		758	585.2	12.1893	228270	88106.3
759	303.6	12.051	469.876	2089.01	0	0		759	383.3	7.30592	6208.14	2257.8		759	617.3	16.6782	1710.58	660.698
760	906.3	12.0525	0	0	31185.3	31752.5		760	496.2	21.6937	803.19	292.5		760	513.4	15.518	9991.56	3861.58
761	587.3	12.056	8461.41	5924.02	0	0		761	259.1	10.8162	8726.32	3197.92		761	468.1	5.59283	28208.7	10907.6
762	595.3	12.056	5705.77	444.872	0	0		762	413.3	25.6642	16169.4	5953.11		762	397.2	23.6707	5009.43	1937.26
763	989.5	12.0617	0	0	0	18338.2		763	534.2	13.6403	15796.1	5830.38		763	638.3	17.4882	6948.41	2692.58
764	443.2	12.0618	1296.34	388.374	478970	736364		764	382.3	9.8925	2992.7	1106.54		764	525.2	24.2027	6565.52	2546.43
765	479.2	12.062	1007.19	650.379	76863.7	37876.3		765	521.4	23.2855	3889.49	1443.94		765	497.3	15.4818	36646	14260.4
766	905.4	12.062	0	0	77957.1	81692.7		766	712.5	22.9052	6039.26	2244.01		766	849.3	8.14467	5272.45	2056.53
767	988.4	12.062	0	0	45393.6	27258.5		767	337.1	20.1088	2745.4	1021.87		767	283.1	24.0623	860.81	335.99
768	607.2	12.0743	23307.5	17545.1	3053.87	0		768	334.9	0.6475	1671.67	622.22		768	471.2	22.897	6473.29	2538.83
769	622.1	12.0743	14680.4	2053.04	0	0		769	493.4	24.4115	4141.89	1543.06		769	267	0.683	1927.34	757.748
770	464.2	12.0789	194.573	0	91484.6	42538		770	152.1	22.3358	2931.09	1094.37		770	459.2	14.9709	120769	47488.8
771	606.2	12.0797	60476	45114.7	10904.5	14513.3		771	394.2	23.2345	3378.14	1262.03		771	626.8	12.0385	37606.2	14814.9
772	584.3	12.08	802805	108728	484047	388202		772	382.3	23.724	9783.14	3669.65		772	377.2	27.8095	11416.9	4508.16
773	566.2	12.0863	2155.04	8271.15	0	0		773	556.2	9.48683	3582.66	1344.51		773	513.2	11.5863	3758.17	1484.05
774	479.1	12.0968	178.204	705.83	30508.5	54769.8		774	769.4	8.44533	3869.51	1453.99		774	442.5	18.673	1602.99	633.759
775	444.1	12.097	0	0	25806.9	4963.99		775	654.3	15.1825	14694.4	5528.42		775	585.3	12.115	76028.6	30069.3
776	548.3	12.1038	11225.9	13095.7	6593.97	3646.97		776	363.2	12.6202	1939.63	730.59		776	512.4	16.829	11644	4612.99
777	587.2	12.1043	2910.48	6769.19	0	0		777	447.2	9.3295	5366.54	2023.68		777	612.3	14.1956	6363.37	2524.15
778	623.2	12.11	5598.7	2625.71	0	0		778	880.6	24.4968	10710.7	4061.29		778	498.2	9.88675	2723.5	1081.84
779	585.3	12.115	97795.7	97239.4	149569	96246.2		779	311.2	8.7735	818.902	310.464		779	393.2	18.1267	8425.27	3386.37
780	586.3	12.115	35392.6	76028.6	33219.5	30069.3		780	406.2	10.6611	6302.27	2389.86		780	607	12.2643	3150.6	1266.34
781	903.4	12.115	0	0	301216	581379		781	598.2	12.8754	13641.6	5237.33		781	378.3	19.612	5613.41	2256.67
782	989.4	12.1152	0	0	40561.6	32923.1		782	363.3	12.5114	6518	2505.15		782	371.2	39.2992	10127.8	4078.08
783	919.3	12.1237	0	0	22536.4	22667.4		783	378.3	20.4333	5445.02	2093.83		783	460.3	15.2253	38208.8	15709.2
784	566.3	12.1285	4697.02	0	0	0		784	310.3	8.756	14911.7	5763.47		784	274.2	12.2292	17163.8	7119.41
785	608.3	12.1285	3262.39	755.013	0	0		785	413.3	21.743	10618.7	4141.55		785	782.3	10.4718	37453.9	15541.8
786	567.3	12.1397	1164.1	4888.38	0	0		786	515.2	14.4471	6743.72	2642.26		786	389.2	13.1463	22367.9	9363.38
787	622.2	12.1397	3797.46	12046.2	0	0		787	623.3	17.4787	6511.06	2596.34		787	535.3	13.6835	6878.54	2884.35
788	296.3	12.1468	2202.82	215.329	0	0		788	317.1	20.591	4221.98	1686.96		788	571.3	14.2585	13478.9	5690.88
789	904.3	12.1687	0	0	368442	241710		789	152.2	7.994	4657.25	1888.7		789	600.4	21.709	21825.9	9216.5
790	584.2	12.1745	339823	887536	139109	225492		790	346.1	17.045	4241.78	1721.5		790	282.3	21.9094	6595.37	2786.59
791	634.8	12.1758	181.859	2235.32	0	0		791	736.3	6.19433	6457.1	2624.16		791	377.4	25.7712	8614.94	3644.28
792	988.5	12.186	0	0	11167	0		792	402.2	10.6482	17237.3	7018.14		792	591.2	16.0838	1218.7	518.027
793	585.2	12.1893	270382	228270	51182.8	88106.3		793	459.2	15.3143	81691.5	33274.5		793	439.3	16.3687	5938.18	2536.12
794	275.2	12.1928	840.242	8886.14	1478.22	646.352		794	578.4	25.9523	1678.53	684.8		794	367.3	10.8118	16544.9	7096.7
795	274.3	12.2118	27053.1	21603.9	19488.8	23413.8		795	584.2	12.1745	339823	139109		795	441.4	18.637	32173.1	13814
796	274.2	12.2292	0	17163.8	10963	7119.41		796	653.3	9.1715	2804.76	1150.56		796	555.2	14.6378	21326.7	9208.56
797	570.2	12.2292	14088.8	15721.6	1201.52	9600.11		797	321.2	5.03933	7896.98	3247.28		797	363.3	12.5114	4669.13	2022.05
798	275.1	12.2378	6488.18	2201.72	1777.34	0		798	622.3	19.0812	3117.38	1282.13		798	305.1	23.5088	4906.44	2127.04
799	496.3	12.2398	890.24	0	916.65	5172.32		799	399.3	8.39317	14345.5	5980.12		799	997.3	13.211	88442	38429.5
800	607	12.2643	0	3150.6	0	1266.34		800	439.2	20.2313	13217.6	5518.15		800	554.2	14.2368	22267.9	9718.02
801	495.1	12.274	332.051	615.158	6389.84	0		801	292.9	15.1985	3784.99	1587.05		801	297.7	10.4068	3252.08	1444.83
802	571.3	12.276	6734.36	4332.64	0	2967.47		802	295.2	8.911	3647.73	1532.76		802	548.4	28.6182	9982.57	4465.66
803	548.2	12.292	3569.39	1079.79	5868.03	3845.87		803	453.3	20.9402	1468.07	619.44		803	543.2	10.3753	5314.06	2378.86
804	445.1	12.2932	0	0	0	3268.85		804	482.2	15.0024	136225	57680.5		804	391.3	25.6687	5179.91	2319.37
805	318.4	12.3175	0	20364.3	0	0		805	463.1	14.9682	1518.23	643.572		805	412.2	7.55867	2800.07	1263.47
806	111	12.3175	2149.09	3249.15	328.6	1583.59		806	461.3	14.9917	2257.96	957.18		806	886.3	7.383	2722.61	1231.4
807	319.3	12.3191	5126.31	3558.35	19035.2	10372.6		807	285.1	23.2215	1639.88	696.42		807	394.1	8.13333	12303.7	5575.14
808	319.2	12.328	11282.7	5404.14	1660.97	0		808	653.3	13.2553	2604.42	1110.38		808	300.1	4.565	1015.65	462.417
809	495.2	12.3285	0	215.205	11658.6	38127.5		809	343.2	23.2725	2582.78	1106.6		809	439.2	13.6925	4437.29	2027.31
810	318.3	12.3378	124667	48933.3	81481.4	132613		810	467.2	24.6274	18529.9	7954.85		810	259.1	10.8162	6000.09	2744.33
811	340.3	12.3549	21493.8	19332.3	27769.3	16230		811	434.2	9.95733	1868.34	812.023		811	369.3	8.49	25297.5	11587.3
812	570.3	12.363	20517.2	16558.8	9526.39	4181.88		812	481.2	15.217	494772	215410		812	439.4	19.5597	3741.02	1719.63
813	444.2	12.3637	0	0	81236.3	139972		813	546.4	28.6611	47260.9	20588.6		813	281.2	21.5153	176652	81779
814	445	12.381	0	0	5620.12	0		814	675.4	22.0618	3592.96	1566.16		814	537.4	25.3952	4129.13	1912.49
815	443.2	12.381	1747.02	818.67	422110	493224		815	599.2	13.3531	14341.8	6258.3		815	535.3	26.8437	2777.34	1287.82
816	571.2	12.381	0	2160.01	2856.7	390.022		816	309.2	8.73	169312	74022.7		816	575.3	13.621	26726.7	12413.1
817	320.2	12.3822	2908.82	182.907	850.662	915.5		817	419.2	8.28917	2709.52	1186.41		817	524.3	24.1315	31947.5	14893
818	445.2	12.3825	0	0	0	7702.53		818	495.3	21.9185	4903.46	2152.86		818	346.3	16.4361	33367.3	15556.8
819	363.4	12.399	1487.08	470.639	3473.8	874.202		819	468.3	24.468	16362.4	7195.14		819	326.2	6.58433	4833.16	2258.69
820	906.4	12.399	0	0	17358.6	51822.9		820	492.3	24.4386	23434	10332.6		820	324.3	7.42017	5420.37	2538.62
821	464.1	12.4005	0	0	10580.8	8522.98		821	509.4	16.3502	1327.97	590.949		821	521.4	23.2855	3720.88	1746.58
822	989.5	12.434	0	0	4100.5	0		822	639.3	15.1815	38042.5	16998.2		822	245	36.822	1996.61	938.958
823	496.2	12.434	0	0	4032.24	2937.48		823	481.2	21.8632	5994.91	2686.04		823	394.1	0.505	5270.71	2489.3
824	907.3	12.434	0	0	10992.6	3167.49		824	554.3	14.3988	45336.4	20401.1		824	366.2	21.562	871.947	412.326
825	907.2	12.4353	0	0	0	3710		825	444.1	9.53717	104638	47265.3		825	283.3	23.2312	75688.7	35860.7
826	457.1	12.4353	0	0	1308.04	4389.6		826	468.2	9.64842	10855.3	4908.68		826	346.1	17.045	1019.41	483.194
827	274.1	12.4435	1281.27	0	4347.83	3273.81		827	483.2	15.252	13968.8	6330.58		827	655.2	16.103	2486.61	1182.81
828	431	12.455	3705.14	1026.99	2371.23	590.342		828	481.4	23.8432	6889.48	3126.84		828	390.2	13.0967	18521.4	8852.23
829	384.3	12.4715	16899.4	8791.64	14345.3	18720.6		829	371	37.088	21247.5	9649.38		829	431.3	5.469	5940.79	2867.25
830	385.4	12.4735	7245.84	2740.82	638.4	989.8		830	317.1	17.2722	57373.8	26066.8		830	283.4	23.7495	28029.7	13557.1
831	445.3	12.488	0	0	3354.75	2712.35		831	378.3	28.6357	16211.5	7460.49		831	111	14.7007	5395.06	2612.48
832	340.2	12.4918	15425.3	1365.09	1992.9	1985.93		832	547.3	11.8343	7195.5	3313.56		832	450.2	0.594167	4841.67	2350.29
833	431.2	12.496	713.245	9696.64	455.392	925.454		833	152.2	42.6933	1096.99	507.74		833	111	12.3175	3249.15	1583.59
834	319.4	12.5068	4885.95	3979.17	3749.28	2328.94		834	525.3	9.99308	18448.8	8561.21		834	542.2	11.0314	8760.49	4278.1
835	318.2	12.5083	8684.61	14614.4	52922	5453.02		835	570.3	12.363	20517.2	9526.39		835	495.3	25.798	7273.15	3568.15
836	362.3	12.509	44693.7	31317.5	46555.5	43820.9		836	510.3	15.9603	20487.8	9523.21		836	383.4	19.825	2735.16	1350.19
837	363.3	12.5114	6518	4669.13	2505.15	2022.05		837	282.3	21.5063	31944.7	14872.9		837	362.2	16.954	3288.12	1623.9
838	444.3	12.523	0	0	13452	0		838	622.4	17.4902	24346.6	11352.6		838	259.1	13.0797	13685.3	6787.63
839	406.3	12.5277	3893.25	2044.78	2370.05	2990.33		839	426.2	11.3767	1921.13	897.795		839	259.2	13.141	19820.9	9860.83
840	384.4	12.531	3017.1	8257.92	9775.4	6145.79		840	284.1	23.467	9371.79	4386.41		840	432.9	8.15	1971.81	982.327
841	362.4	12.5415	0	7289.57	7044.76	16126.9		841	397.2	21.6248	4728.65	2216.95		841	368.2	10.7786	10543.5	5255.49
842	481.3	12.576	0	0	0	2842.08		842	368.3	10.7505	4888.72	2294.9		842	453.2	14.0548	23043.1	11504.9
843	359.4	12.5842	0	6820.04	817.74	0		843	367.3	10.8118	29858.5	14105.9		843	111	28.9788	4745.53	2372.61
844	384.2	12.5937	947.474	0	5310.62	8321.28		844	455.1	7.88883	14933.5	7082.48		844	403.1	10.449	9516.42	4758.07
845	919.4	12.611	0	0	3122.67	161.487		845	326.2	6.58433	3828.75	1822.14
846	428.3	12.6149	352.263	4708.91	1223.68	5119.47		846	316.3	2.93483	6926.4	3328.51
847	406.2	12.619	3232.42	0	3673.6	7655.76		847	375.3	24.3063	3989.7	1917.54
848	363.2	12.6202	1939.63	2517.5	730.59	332.144		848	547.2	9.86533	13882.9	6727.67
849	570.2	12.6202	988.38	8406.86	1547.04	1138.89		849	599.5	21.6026	10771.9	5226.86
850	464	12.628	0	0	0	4280.28		850	497.3	15.4818	24379.8	11881.7
851	464.3	12.6454	0	0	0	5257.82		851	373	42.3758	1067.34	521.09
852	907.4	12.647	0	0	4060.86	672.294		852	427.2	15.0547	57774.6	28254.7
853	888.7	12.6548	2486.76	0	0	0		853	671.5	21.561	8134.57	3982.76
854	406.4	12.6732	1123.91	4729.6	309.847	0		854	497.4	22.3177	4566.48	2241.08
855	481.1	12.682	0	0	5126.73	0		855	509.2	15.943	18627	9162.94
856	570.3	12.6865	4102.86	15647.4	3980.44	0		856	286.2	22.7975	3013.58	1487.72
857	477.3	12.7093	5367.6	4379.06	1938.74	165.195		857	498.2	9.88675	6229.01	3085.61
858	152.3	12.749	0	0	0	2870.78		858	477.2	9.86533	1563.39	777.226
859	392.9	12.749	2201.37	2187.71	0	6100.8		859	434.1	6.9825	3874.42	1932.97
860	499.3	12.762	0	7373.47	1427.2	326.305		860	520.2	10.4068	10555.8	5268.93
861	499.1	12.771	0	0	2443.58	994.357		861	439.3	16.3687	2304.92	1152.31
862	453.3	12.788	0	621.777	3385.56	0
863	420.2	12.8458	968.439	1153.71	4575.6	4152.38
864	675.3	12.855	4068.52	1490.66	0	0
865	469.2	12.859	1051.4	3603.76	4509.69	2705.12
866	526.3	12.869	2035.6	3372.86	2103.31	5094.85
867	599.3	12.869	3412.15	2405.81	0	4025.86
868	598.2	12.8754	13641.6	1230	5237.33	1528.53
869	441.1	12.8997	0	0	30453	66718.9
870	151.8	12.92	0	806.27	0	3523.51
871	675.4	12.9463	4563.3	182.289	0	0
872	877.4	12.948	0	0	2787.87	981.161
873	684.4	12.9547	0	347.018	651.297	6756.58
874	598.1	13.0007	4810.49	0	510.171	975.849
875	551.1	13.0092	7468.83	7651.6	1179.57	818.324
876	551.2	13.0192	18944.4	1311.46	859.851	953.025
877	390.1	13.0367	4894.11	1620.94	350.033	221.464
878	562.3	13.044	735.43	3164.1	214.668	0
879	422.1	13.0562	949.598	0	1777.62	4047.14
880	569.1	13.0731	2008.06	0	2560.96	4069.26
881	259.1	13.0797	15167.8	13685.3	3716.93	6787.63
882	152	13.092	3489.36	1746.54	0	4874.38
883	367.1	13.092	4841.31	1986.66	188.126	218.378
884	495.4	13.0946	4966.09	2663.23	663.52	2032.88
885	371	13.0967	7511.2	18521.4	9576.98	8852.23
886	390.2	13.0967	939.194	3261.4	568.533	560.373
887	422.2	13.1068	385.787	1124.92	390.08	2588.83
888	653.4	13.124	1825.89	0	1177.45	4371.42
889	463.3	13.124	0	0	3235.72	11895
890	424.3	13.128	5093.9	0	0	0
891	259.2	13.141	8008.3	5571.27	2544.96	5855.37
892	652.3	13.141	9478.48	19820.9	400.991	9860.83
893	389.2	13.1463	17509.9	22367.9	5859.68	9363.38
894	568.2	13.1463	12713.9	13576.5	6992.35	8555.44
895	409.2	13.161	0	611.901	2664.66	340.476
896	999.3	13.1642	5184.32	6222.79	5593.5	4530.83
897	652.4	13.1643	2893.7	9178.54	0	3381.31
898	569.2	13.167	852.969	7153.61	1228.54	1689.09
899	569.3	13.1691	6249.94	624.448	796.62	3241.22
900	653.2	13.1703	0	3709.39	0	3024.98
901	998.4	13.1725	11320.5	27168.1	8182.14	23311.2
902	424.2	13.1775	516.454	1797.12	11413.7	12614.9
903	410	13.196	0	0	2248.22	0
904	997.3	13.211	31828.6	88442	10468.1	38429.5
905	652.2	13.2184	0	0	5124.04	4647.03
906	903.2	13.2257	0	0	0	2442.52
907	999.4	13.2319	2237.38	11146.5	0	6284.4
908	997.4	13.2418	12278.9	4815.61	8191.68	22833.4
909	424.1	13.2418	413.062	0	0	4150.46
910	625.1	13.2552	2531.28	0	0	0
911	653.3	13.2553	2604.42	5422.42	1110.38	171.648
912	684.2	13.2588	627.443	0	0	4795.69
913	441.1	13.285	0	364.134	26692.6	0
914	857.6	13.3078	0	2619.26	0	0
915	469.2	13.3095	4633.39	4041.92	1513.37	0
916	324.2	13.32	1346.1	854.74	7083.82	2655.55
917	414.3	13.3262	1007.81	0	8043.95	27619
918	453.3	13.3262	711.844	0	1247.14	4902.5
919	827.3	13.338	0	0	3914.59	0
920	598.2	13.3423	0	20562.2	4408.54	0
921	827.5	13.3432	0	0	0	3798.88
922	373.1	13.3432	0	915.695	479.36	4377.91
923	598.3	13.3465	44556.1	26788.3	12043	30030.1
924	324.3	13.3465	2919.24	0	0	667.976
925	998.2	13.3494	390.192	6790.08	3053.25	0
926	599.2	13.3531	14341.8	4867.15	6258.3	8345.38
927	684.3	13.3592	520.261	0	0	6215.34
928	620.2	13.3602	1003.27	4102.2	799.932	1038.29
929	373	13.3638	3735.94	1178.06	444.05	449.296
930	849.2	13.3671	0	0	2732.68	3863.13
931	414.9	13.373	0	0	6088.93	0
932	324.1	13.3958	1928.28	4078.43	3243.99	876.934
933	151.9	13.4106	1106.44	3570.14	4536.8	565.224
934	600.2	13.4125	3701.65	4967.82	1212.27	0
935	827.4	13.4262	0	0	7838.49	4562.46
936	828.3	13.4427	0	0	4862.38	6015.84
937	620.3	13.4482	181.769	3631.25	1546.27	0
938	599.3	13.4518	5485.41	9575.28	3128.53	1983.06
939	629.2	13.4552	2704.42	191.287	0	0
940	414.2	13.471	539.241	0	8344.32	1361.94
941	849.4	13.4933	0	0	410.025	2225.71
942	276.6	13.515	0	0	4836.78	2667.99
943	613.3	13.5527	1746.79	2724.48	0	943.781
944	415.1	13.568	11615.5	917.995	13273	6727.89
945	372.2	13.568	0	2829.97	3684.6	0
946	455.3	13.586	0	422.881	7470.82	0
947	495.1	13.6048	0	5211.19	0	0
948	438.3	13.6102	369.876	0	0	10790
949	534.3	13.6113	12889.5	2440.33	7781.95	2737.65
950	575.3	13.621	11920	26726.7	10362.7	12413.1
951	454.1	13.6248	7221.78	13682.8	0	23710.1
952	535.2	13.6347	7127.17	1529.99	0	3276.27
953	852.4	13.6365	4046.3	0	17119.4	6497.25
954	534.2	13.6403	15796.1	32221.4	5830.38	18854.6
955	415.2	13.644	6471.3	18266.9	51764	32919.1
956	494.3	13.6446	0	0	8480	8614.39
957	851.4	13.6548	5783.71	11650	17896.4	3163.74
958	575.2	13.6548	10287.3	0	0	3317.52
959	494.2	13.6559	35107.7	27444.9	21420.8	15500.4
960	416.2	13.6567	1186.44	6732.93	7183.85	1634.58
961	438.2	13.6568	9717.36	30103.4	31838.9	9801.7
962	948.4	13.6568	3022.44	5507.26	8170.18	3864.62
963	460.3	13.657	2874.8	5589.33	7329.33	4808.69
964	853.4	13.66	236.772	1233.07	442.152	2802.64
965	877.4	13.669	0	0	0	4005.91
966	536.3	13.6733	4980.94	647.885	2582.16	1361.86
967	434.1	13.675	0	460.532	4074.64	1444.21
968	437.2	13.675	103250	119395	195102	135384
969	416.3	13.677	3233.53	2082.06	6155.7	8313.58
970	453.2	13.677	96145.2	74183.6	188279	147440
971	535.3	13.6835	3477.83	6878.54	4537.47	2884.35
972	495.3	13.6907	9982.74	4291.95	600.514	6069.33
973	439.2	13.6925	1456.43	4437.29	6396.71	2027.31
974	852.3	13.7012	2052.78	5877.33	0	8182.34
975	453.1	13.7018	98566.7	91689.1	49565.3	61111.8
976	271.3	13.71	329.822	0	2949.82	0
977	454.2	13.746	19761.7	28905.8	74810.7	32839.4
978	948.5	13.7633	3149.53	593.479	0	311.897
979	468.3	13.7728	6287.86	715.992	1553.75	4939.33
980	438.1	13.781	14303.9	5213.91	25490.2	14113.7
981	877.2	13.781	0	0	4151.52	560.231
982	468.2	13.7953	0	320.568	3882.62	4403.45
983	851.3	13.7985	1408.81	3094.41	14867.5	2270.81
984	456.2	13.8003	6502.56	1582.04	4188.54	2970.6
985	494.1	13.8003	7936.35	813.635	877.92	984.425
986	433.2	13.8078	2917.78	5474.28	595.72	658.317
987	455.1	13.8107	11124.2	5866.78	5564.42	26098.9
988	534.1	13.8437	0	0	1284.39	2579.22
989	455.2	13.8545	45974.4	24546.6	14324.3	2952.07
990	510.1	13.8607	428.511	0	0	2431.97
991	854.3	13.8607	0	0	709.108	7743.98
992	855.3	13.8607	0	0	1728.49	6521.6
993	456.1	13.8652	0	4194.03	1408.12	0
994	439.3	13.87	1498.04	969.172	3677.44	1602.29
995	877.3	13.887	0	0	4747.73	2359.81
996	414.8	13.8937	0	0	0	2884.67
997	111.2	13.8937	3832.31	2746.94	4570.85	7238.05
998	415.3	13.9361	0	3505.25	0	5743.58
999	513.3	13.9445	0	0	211.86	4234.42
1000	509.9	13.9605	0	0	0	3589.55
1001	410.2	13.9633	9816.55	1580.04	181.246	1158.36
1002	456.3	13.9633	4620.76	2355.28	900.834	2528.58
1003	438.2	13.9716	8871.91	11307.1	11008.2	7018.42
1004	415.2	13.976	4105.02	1316.11	12257.3	4422.74
1005	854.4	13.976	0	935.514	6795.46	8811.91
1006	855.4	13.976	183.011	0	3904.97	2946.7
1007	697.3	13.976	0	0	7436.05	2526.43
1008	852.5	13.994	0	0	2287.48	0
1009	373.3	14.0363	2696.64	0	0	0
1010	453.2	14.0548	20461.6	23043.1	33637	11504.9
1011	144.1	14.0617	185.66	0	561.768	3698.34
1012	609.2	14.0733	2550.38	317.503	692.25	471.413
1013	512.6	14.0777	0	0	0	5846.96
1014	111	14.0777	981.508	487.062	630.48	9032.16
1015	359.4	14.0948	0	0	0	2425.63
1016	593.3	14.1137	4507.69	740.719	4469.31	1133.36
1017	609.3	14.1343	4303	4930.13	1016.33	1747.37
1018	555.2	14.1792	4663.55	14583	9406.07	7811.01
1019	532.3	14.184	9012.98	3595.96	19437.3	14411.9
1020	533.3	14.189	1210.83	2548.98	5973.38	1975.19
1021	570.2	14.189	12456.1	8341.72	11944.7	12126.5
1022	612.3	14.1956	6404.15	6363.37	716.455	2524.15
1023	532.2	14.2077	1044.28	3904	0	1312.07
1024	335.3	14.2123	0	720.846	0	4614.83
1025	554.2	14.2368	43466.6	22267.9	12372.4	9718.02
1026	570.3	14.2412	9859.06	10151.6	2707.23	1698.27
1027	571.3	14.2585	12302.3	13478.9	9304.11	5690.88
1028	437	14.2798	0	1030.57	0	3872.57
1029	611.3	14.2798	0	0	6862.8	16632.2
1030	555.3	14.313	5310.09	3700.23	7344.74	9060.27
1031	455	14.313	0	719.724	2113.06	0
1032	662.3	14.3477	0	0	1306.25	7368.73
1033	532.4	14.3812	3124.85	496.851	0	7500.88
1034	554.3	14.3988	45336.4	67837.5	20401.1	25893.1
1035	373.2	14.419	1390.14	0	2853.52	480.278
1036	571.2	14.4328	3877.76	0	4026.38	4304.57
1037	611.4	14.437	0	0	4555.02	896.761
1038	515.3	14.4455	1393.47	1207.55	4792.81	4069.16
1039	515.2	14.4471	6743.72	2638.07	2642.26	4168.03
1040	318.4	14.4557	7184.68	0	0	3159.14
1041	437.3	14.5298	537.19	4194.13	860.52	870.942
1042	612.1	14.547	1404.33	3602.02	200.34	0
1043	452.9	14.5522	444.131	0	0	2300.47
1044	501.8	14.579	0	0	5359.66	287.689
1045	359.3	14.5835	11071.3	3424.1	5896.78	2866.75
1046	395.1	14.5835	6058.96	4368.08	3780.58	1561.08
1047	468.2	14.602	5225.65	2392.28	0	3095.2
1048	555.2	14.6378	14556.5	21326.7	12792.2	9208.56
1049	497.1	14.6487	1642.28	5652.81	0	0
1050	515.4	14.6923	2925.25	0	837.09	0
1051	111	14.7007	1487.09	5395.06	1544.25	2612.48
1052	359.4	14.72	0	997.154	3747.14	0
1053	333.1	14.7343	259.703	2597.62	516.22	2092.97
1054	549.3	14.7425	3717.11	368.315	3034.29	0
1055	395.3	14.768	1601.03	2344.26	0	0
1056	437	14.7835	3024.18	869.932	0	0
1057	394	14.8192	4779.54	1531.14	3516.63	0
1058	334.3	14.8455	612.379	1518.87	5196.37	3799.31
1059	295.1	14.8977	381.88	2076.72	0	4525.77
1060	427.3	14.8977	2767.13	1112.21	818.985	14700.2
1061	527.2	14.8977	0	1405.65	369.555	4653.87
1062	482.3	14.9053	1090.24	14824.9	0	0
1063	393	14.9102	10841.7	3088.21	1791.98	2922.2
1064	441.9	14.9155	0	0	0	2123.62
1065	940.3	14.9227	0	5006.5	0	0
1066	312.3	14.9368	32015.7	11097.9	22146.6	20842
1067	500.2	14.9502	0	0	0	3708.33
1068	392.2	14.951	0	166.405	2554.46	0
1069	941.4	14.9567	202.817	6190.08	1232.78	2178.77
1070	498.1	14.967	6962.56	4521.61	1451.45	4198.29
1071	293.3	14.968	4114.12	4189.72	4697.3	882.669
1072	527.4	14.968	1036.41	940.711	4193.97	178.94
1073	428.3	14.9682	299.89	474.133	3075.06	7247.09
1074	463.1	14.9682	1518.23	0	643.572	4117.34
1075	459.2	14.9709	45461.8	120769	3644.2	47488.8
1076	939.3	14.986	1041.29	0	8804.71	1992.24
1077	481.3	14.986	0	0	33279.8	111318
1078	441.2	14.9887	15198.6	7324.6	10653.9	16146
1079	284.8	14.9917	0	2537.57	0	0
1080	461.3	14.9917	2257.96	5464.8	957.18	2781.37
1081	313.1	14.9917	0	3331.32	0	647.876
1082	497.2	14.9981	51433.8	37686.8	9992.73	24305.7
1083	479.2	15.0008	4154.71	0	301.04	1087.49
1084	551.3	15.0008	4129.37	2678.59	2713.62	880.83
1085	482.2	15.0024	136225	98541.6	57680.5	74298
1086	503.3	15.0024	2655.3	2133.17	0	3230.02
1087	478.7	15.004	0	0	4132.39	642.434
1088	940.4	15.0066	56080.7	31780.9	5049.79	8371.88
1089	312.2	15.0092	5227.11	9819.3	16938.8	6619.01
1090	313.3	15.0182	9737.73	426.322	7073.31	1411.26
1091	483.3	15.022	0	7088.65	10356.3	7282.4
1092	503.1	15.022	1521.76	0	5003.03	457.515
1093	293.7	15.0257	0	2675	0	0
1094	460.2	15.0363	27493.9	8490.6	4469.58	17793.5
1095	528.3	15.0363	2857.99	937.757	349.236	0
1096	459.3	15.039	70813.9	20584.4	69055.5	43704.6
1097	770.4	15.039	880.828	267.914	3658.97	425.4
1098	427.2	15.0547	57774.6	62130.6	28254.7	53132.6
1099	470.3	15.0547	11819	891.797	0	196.59
1100	470.8	15.0547	5650.04	0	1251.04	0
1101	478.8	15.0547	7997.92	2791.53	0	0
1102	654.4	15.0608	532.324	6735.06	0	0
1103	961.3	15.0608	0	2321.09	1101.21	0
1104	428.1	15.0638	4857.98	897.419	666.411	6073.6
1105	293	15.0659	757.644	1171.59	4412.8	6013.8
1106	479.8	15.072	2524.75	0	0	0
1107	293.2	15.072	6199.58	1065.57	2252.45	999.783
1108	428.2	15.072	14039.5	13158.2	3538.72	827.324
1109	939.4	15.0735	92331.3	61530.9	9571.03	7683.46
1110	152.3	15.0738	0	0	0	2467.08
1111	631.3	15.0772	3674.86	4005.86	0	827.756
1112	498	15.0785	0	3984.71	2146.13	0
1113	956.3	15.0902	6135.69	1577.76	0	380.075
1114	471.2	15.0902	4664.53	720.012	0	0
1115	770.6	15.0902	5261.68	164.689	0	0
1116	371	15.1085	15297.7	0	2404.29	1761.94
1117	497.3	15.11	0	0	8379.42	0
1118	442.1	15.11	1199.13	0	0	4375.78
1119	395.2	15.1127	528.894	4267.12	937.04	0
1120	549.2	15.1267	3029.33	1569.08	496.29	0
1121	941.3	15.1267	13899.8	5700.1	276.66	1080.71
1122	721.9	15.1267	6086.22	501.243	0	0
1123	616.3	15.128	724.85	4980.58	5887.24	9781.68
1124	566.2	15.1303	3034.25	3803.28	576.666	2224.43
1125	955.4	15.1438	7007.83	2719.49	0	0
1126	478.3	15.1452	21071.7	3946.11	0	2729.81
1127	111.2	15.146	3499.58	2935.56	5714.46	0
1128	718.3	15.1543	3310.25	2841.91	0	167.256
1129	312.1	15.1544	0	0	3543.94	3971.62
1130	409.1	15.18	16006.7	2169.93	19446.2	2098.25
1131	639.3	15.1815	38042.5	27140.8	16998.2	20584.2
1132	292.8	15.1825	0	2546.02	0	0
1133	527.2	15.1825	2048.35	4654.75	0	2612.31
1134	654.3	15.1825	14694.4	16432.3	5528.42	13400.9
1135	638.3	15.1985	26934.6	27886.4	54180	14068.7
1136	292.9	15.1985	3784.99	0	1587.05	0
1137	409.2	15.1987	14944.8	42210.7	12350.4	25312.6
1138	442	15.1987	513.156	1780.88	0	3671.78
1139	638.4	15.1987	8638.74	10676.6	4753.1	35680.2
1140	249.3	15.2002	0	3023.53	0	0
1141	461.2	15.2002	3717.39	5948.82	3275.73	1851.37
1142	617.2	15.2002	1313.17	7489.08	1960.53	1638.76
1143	293.3	15.2168	596.301	3544.51	3827.66	7022.93
1144	478.2	15.2168	5929.54	4862.59	7059.43	3066.58
1145	410.3	15.217	0	3312.94	1078.85	869.294
1146	481.2	15.217	494772	1050738	215410	116238
1147	460.3	15.2253	33881.9	38208.8	6199.73	15709.2
1148	499.2	15.2347	4150.11	9352.55	3719.27	1154.75
1149	441.1	15.252	8917.39	2247.49	0	12643.9
1150	483.2	15.252	13968.8	8972.85	6330.58	1824.72
1151	503.1	15.252	4697.31	1087.86	305.655	0
1152	393.9	15.252	0	0	2496.98	777.793
1153	285.3	15.2525	3723.5	5122.47	0	835.276
1154	961.4	15.2525	9437.86	7300.91	1566.74	209.588
1155	718.8	15.2525	327.542	4347.09	0	0
1156	503.2	15.27	2585.53	2187.23	3708.31	2272.89
1157	337.1	15.2703	10982.6	9612.48	2313	3468.86
1158	284.9	15.2872	2284.37	4312.18	0	453.505
1159	499.1	15.2873	2869.72	0	209.328	0
1160	654.4	15.305	0	7569.46	0	0
1161	470.2	15.305	4090.08	6153.14	0	502.878
1162	372.3	15.3053	3515.42	0	0	0
1163	497.2	15.3067	52360.2	41701.2	17865.4	21764.1
1164	459.2	15.3143	81691.5	83956.6	33274.5	30186.4
1165	482.2	15.323	116785	271014	78666.5	44235.6
1166	504.2	15.3235	6803.31	1219.41	2227.75	0
1167	428.3	15.3398	0	2494.85	699.705	745.882
1168	460.2	15.3407	22714.3	0	4812.62	552.281
1169	962.4	15.3407	7412.58	1047.61	160.815	0
1170	616.2	15.3407	6391.98	2125.2	0	0
1171	295.2	15.3577	3145.98	3846.74	928.092	0
1172	497.1	15.358	0	0	5193.68	0
1173	503.3	15.358	1863.61	1306.56	2750.97	0
1174	441.2	15.3587	16867.8	4083.77	17995.3	8994.98
1175	940.4	15.3587	49798.3	26104.1	4196.18	1217.4
1176	941.4	15.3768	9564.37	3329.95	1017.6	0
1177	955.3	15.3768	4109.89	984.208	0	0
1178	567.3	15.3938	5648.97	396.638	728.029	0
1179	854.3	15.3968	0	0	1403.3	8192.74
1180	513.3	15.4107	0	5242.76	338.67	0
1181	616.4	15.412	0	4430.87	5347.78	2312.02
1182	640.3	15.412	2708.3	716.195	167.676	269.837
1183	372.8	15.4287	0	3030.72	0	0
1184	297.2	15.43	3270.61	0	497.417	0
1185	482.3	15.4403	22383.1	5739.22	0	14531.9
1186	333.2	15.4522	0	0	0	2793.89
1187	460.4	15.4522	0	0	0	2400.86
1188	498.3	15.4559	11172.8	9933.4	499.14	1891.22
1189	941.5	15.4652	2856.9	0	0	0
1190	295	15.4818	651.244	3968.71	0	449.606
1191	395.2	15.4818	2130.9	3474.42	2175.8	511.962
1192	497.3	15.4818	24379.8	36646	11881.7	14260.4
1193	409.3	15.482	0	2236.04	3898.01	405.438
1194	655.3	15.4832	7575.34	3221.99	1560.87	3372.51
1195	513.4	15.518	0	9991.56	4428.98	3861.58
1196	513.2	15.5362	4907.02	0	0	755.574
1197	653.3	15.5386	0	0	39524.1	9438.71
1198	640.1	15.5427	688.701	236.998	0	2299.4
1199	654.3	15.571	10110.1	7509.47	16667.3	4432.11
1200	390.3	15.571	171.462	0	4667.89	0
1201	498.4	15.5893	5943.6	2575.02	0	228.28
1202	639.2	15.6067	2509.08	4449.57	588.823	0
1203	350.1	15.607	758.395	390.245	2684.8	1136.17
1204	441.3	15.6073	4600.99	0	2385.6	0
1205	452.2	15.6557	20697	6735.68	4198.38	9016.22
1206	279.3	15.6602	3292.5	317.601	430.36	252.272
1207	391.1	15.6892	574.681	0	370.638	3358.96
1208	482.1	15.715	0	10701.4	3827.2	542.321
1209	401.3	15.731	0	0	4194.03	0
1210	293.3	15.731	2926.66	0	218.325	0
1211	151.9	15.769	0	5562.82	3197.68	0
1212	394	15.8018	5642.37	690.061	4365.08	1101.78
1213	411.3	15.8018	3821.87	177.95	299.98	0
1214	453.2	15.8367	5435.76	2571.88	6888.94	19805.3
1215	453.3	15.855	19838	5633.02	6751.13	1948.92
1216	510.2	15.873	0	4069.83	1125.7	7871.41
1217	452.1	15.8741	7141.89	4692.76	0	2351.01
1218	592.2	15.875	0	5993.6	509.757	9100.18
1219	260.9	15.8953	1882.36	5014.5	298.292	0
1220	593.3	15.8953	2324.28	4209.26	587.127	468.491
1221	591.3	15.9008	37599	32974.1	23107	25154.2
1222	509.3	15.9138	46948.9	52776.8	16953.8	10657.5
1223	439.2	15.9284	4982.07	3696.82	1115.12	709.511
1224	509.2	15.943	18627	3960.94	9162.94	9826.76
1225	607.2	15.943	1338.58	957.42	3196.06	0
1226	510.3	15.9603	20487.8	13574.5	9523.21	3045.09
1227	481.1	15.9608	6933.46	668.448	0	0
1228	439.1	15.961	477.912	0	2375.69	1392.26
1229	686.3	15.97	0	0	13492.5	9728.65
1230	111.2	15.9807	3634.97	2711.63	0	2820.66
1231	592.3	15.9817	25130	12136.8	4595.79	880.276
1232	592.4	15.9847	0	0	1320.38	3688.11
1233	685.3	15.9892	944.695	0	43620.1	32203.5
1234	616.1	16.0023	0	180.549	0	2466.62
1235	632.3	16.0135	4877.77	340.314	2466.13	0
1236	453.4	16.014	2719.13	6703.84	15193.5	0
1237	685.4	16.0577	197.191	0	2969.22	21956.2
1238	591.2	16.0838	14238.2	0	580.32	2934.67
1239	652.4	16.0838	4174.77	1218.7	0	518.027
1240	511.3	16.0883	13002.3	8745.78	1242.67	3109.17
1241	655.2	16.103	962.721	2486.61	2976.48	1182.81
1242	593.4	16.1185	5311.16	0	0	0
1243	408.2	16.138	0	0	3352.58	381.066
1244	407.2	16.1507	1561.59	624.906	806.205	5584.79
1245	319.1	16.1883	880.27	0	882.98	4702.08
1246	370.9	16.1888	9686.28	0	0	0
1247	359.1	16.1888	5541.85	910.914	951.045	1971.89
1248	511.1	16.2065	3388.76	0	0	0
1249	379.3	16.2412	2881.39	0	892.08	0
1250	393.2	16.2617	0	1283.21	1750.06	6875.16
1251	569.5	16.2617	0	0	1207.23	3071.78
1252	374.4	16.2805	0	0	0	2660.33
1253	279.3	16.2993	517.272	198.199	528.24	10466
1254	941.7	16.3468	2097.55	0	0	0
1255	347.4	16.3502	0	3772.08	177.497	2395.97
1256	509.4	16.3502	1327.97	4438.49	590.949	0
1257	569.4	16.351	2602.77	608.154	4035.44	1247.26
1258	319.2	16.3548	1820.58	3115.07	1677.93	15932.3
1259	654.4	16.3548	2488.36	0	0	5793.07
1260	373	16.3637	2531.55	640.419	0	0
1261	439.3	16.3687	2304.92	5938.18	1152.31	2536.12
1262	457.2	16.369	0	0	3641.09	0
1263	457.4	16.3862	249.135	4014.22	7058.17	5526.65
1264	279.1	16.4338	6118.88	2106.38	1460.87	7408.99
1265	346.3	16.4361	64008.6	33367.3	15712.2	15556.8
1266	319.3	16.4778	1668.17	2610.78	0	712.906
1267	347.3	16.4912	5317.47	6204.65	3826.87	1423.7
1268	368.3	16.5169	7175.97	5286.4	1071.48	2815.46
1269	321.2	16.5508	6636.32	6040.39	1387.33	1662.16
1270	639.4	16.556	8882.43	1564.44	1527.16	4043.19
1271	639.3	16.5588	1304.5	1960.24	909.51	3042.34
1272	111.2	16.5607	4091.73	455.791	3284.94	1441.64
1273	390.4	16.564	0	0	3943.96	390.934
1274	281.2	16.6238	2571.7	4069.33	570.84	0
1275	321.1	16.6413	0	5510.88	165.075	0
1276	617.3	16.6782	3963.04	1710.58	637.398	660.698
1277	346.1	16.705	1138.9	0	3227.7	0
1278	281.3	16.7142	7820.12	10761.4	479.7	524.136
1279	321.3	16.7327	0	4916	637.06	813.06
1280	959.8	16.748	2336.24	0	0	0
1281	512.3	16.8055	1141.85	11225.1	1458.24	0
1282	371.9	16.812	0	2166.49	3199.68	2004.93
1283	409.3	16.8175	349.916	850.981	0	2696.42
1284	512.4	16.829	8305.58	11644	15140.6	4612.99
1285	295.3	16.8363	0	0	0	2590.37
1286	371.8	16.8413	0	3384.41	0	0
1287	317.3	16.855	0	0	0	4767.92
1288	605.3	16.87	5612.81	3586.56	394.314	0
1289	362.2	16.954	733.066	3288.12	6030.03	1623.9
1290	110.9	16.9862	0	2662.72	393.888	0
1291	259.1	17.024	968.194	582.172	3094.14	1431.2
1292	346.1	17.045	4241.78	1019.41	1721.5	483.194
1293	371.2	17.0583	7507.33	12727.4	1780.42	0
1294	359.4	17.0617	4932.02	1470.86	539.955	0
1295	362.3	17.1477	0	725.198	1490.13	3025.07
1296	318.2	17.1487	0	3357.95	0	0
1297	239.3	17.1662	1177.38	175.992	1760.09	3406.46
1298	279.2	17.1668	9243.88	7650.08	6464.78	12076.8
1299	373.2	17.1668	4171.71	965.861	2962.08	0
1300	247.3	17.184	0	1044.96	4090.75	0
1301	247	17.202	0	0	0	3407.99
1302	302.1	17.2022	13155.7	14383.8	33430.6	13123
1303	303.1	17.2022	841.986	4928.82	732.46	875.95
1304	362.4	17.2022	981.84	5035.55	2863.78	0
1305	205.1	17.2105	15436.4	10218.3	3379.94	7899.63
1306	301.2	17.219	174671	181452	119969	26101.2
1307	581.2	17.219	8424.85	1618.38	6221.73	1114.22
1308	318	17.2198	418.059	1761.78	3931.31	6290.23
1309	579.3	17.228	251471	255569	246787	291623
1310	412.1	17.2294	0	993.539	4545.98	3888.08
1311	302	17.2357	14374.4	0	0	0
1312	437.3	17.2357	3474.48	0	0	0
1313	465.3	17.2357	5909.49	167.727	1917	287.219
1314	580.3	17.2368	91404.7	88055.7	93250.1	104923
1315	373.3	17.2375	0	2753.11	0	0
1316	279.1	17.2533	10890.4	13274.1	8130.67	10225
1317	362.5	17.255	282.106	0	4460.53	0
1318	302.2	17.2573	20199	12180.3	10561.6	16064
1319	581.3	17.2573	7035.25	17385.4	6661.7	19155.9
1320	318.1	17.271	12870.4	2086.98	2642.23	3806.88
1321	317.1	17.2722	57373.8	54724.5	26066.8	44850.8
1322	205.2	17.2748	3348.31	0	1132.08	7032.04
1323	247.4	17.292	0	3278.48	0	0
1324	580.2	17.292	0	20462.9	0	11203.7
1325	301.1	17.3053	98375.5	53541.9	198494	230746
1326	466.3	17.3053	6878.9	995.035	656.703	1697.69
1327	205	17.308	3027.08	7578.26	9272.14	2532.52
1328	512.5	17.309	291.348	2260.9	0	0
1329	279.3	17.3405	4963	0	0	0
1330	303.2	17.3493	5293.03	926.627	3805.94	1471.85
1331	342.3	17.356	356.301	2680.74	0	3380.77
1332	317.2	17.3662	9374.33	10731.3	6760.04	39006.4
1333	204.9	17.3845	0	0	0	4418.03
1334	412.4	17.397	0	1246.48	5801.38	439.209
1335	111.1	17.402	2838.94	1313.31	2678.1	9314.8
1336	623.4	17.4168	0	3555.26	0	0
1337	412.5	17.439	0	0	0	3146.71
1338	623.3	17.4787	6511.06	4071.49	2596.34	5958.26
1339	349.2	17.4882	0	3584.21	465.405	506.976
1340	638.3	17.4882	2731.25	6948.41	4433.98	2692.58
1341	622.4	17.4902	24346.6	1939.43	11352.6	1606.08
1342	600.4	17.503	2641.37	1483.9	3551.77	3931.59
1343	581.4	17.5118	1143.55	341.504	294.624	4089.54
1344	349.3	17.5292	1815.11	888.062	1529.67	4684.75
1345	622.3	17.5311	3598.23	23843	7968.02	6434.62
1346	205	17.6325	3733.89	1632.59	0	518.915
1347	317	17.6477	11314.8	8180.59	860.8	6105.62
1348	302	17.7003	7170.9	1551.67	0	3872.57
1349	301.1	17.754	70928.2	59187.1	53019.1	35325
1350	302.3	17.7619	3678.19	0	4052.67	0
1351	395.2	17.787	3610.26	2380.9	5187.35	7027.5
1352	369.4	17.8205	490.024	757.562	6745.76	4537.96
1353	319.2	17.8208	2818.13	2918.22	2370.17	507.705
1354	737.5	17.822	0	704.057	2551.42	0
1355	354.4	17.911	644.188	176.355	3858.49	0
1356	622.4	17.914	7010.7	10539.6	248.802	1992.48
1357	369.1	17.9363	2886.38	5011.89	0	1460.04
1358	638.2	17.949	2675.39	9662.43	3171.8	336.662
1359	111.1	17.964	809.151	3771.39	4453.83	3548.29
1360	297.3	17.985	308.755	4033.85	1132.1	2983.84
1361	425.2	18.0108	17157.4	19300.4	192.417	10409.8
1362	319.3	18.0134	6181.26	603.561	6442.68	1356.03
1363	441.1	18.0148	5592.32	6623.74	746.565	0
1364	371.2	18.0385	0	0	0	9101.42
1365	297.1	18.0865	2696.47	433.615	508.25	1564.31
1366	373.1	18.0908	1302.9	4056.62	3040.6	1022.51
1367	424.9	18.0928	0	0	0	3165.89
1368	425.3	18.1247	6614	2505.53	13735.8	2526.4
1369	393.2	18.1267	0	8425.27	0	3386.37
1370	152.1	18.1297	2303.68	755.72	657.105	0
1371	441.2	18.1483	5592.56	1315.56	30708.1	29066.9
1372	419.2	18.159	0	251.173	5525.59	0
1373	359.4	18.194	0	0	3379.15	0
1374	394	18.1965	1663.13	8400.72	2362.08	938.489
1375	319.1	18.247	2426.92	0	3046.4	2543.91
1376	381.4	18.336	945.547	171.874	3708.8	0
1377	467.4	18.3643	0	0	739.11	2515.39
1378	260.9	18.3742	690.763	4249.34	2035.2	0
1379	437.3	18.391	759.717	3421.72	224.082	175.198
1380	483.4	18.4182	0	180.48	0	2759.71
1381	441.1	18.425	377.847	1184.77	5022.49	1547.55
1382	437.2	18.4602	5449.01	1904.43	851.2	166.139
1383	300.9	18.478	0	0	2547.07	606.395
1384	442.4	18.513	168.992	0	2187.26	0
1385	939.4	18.5505	1366.22	4865.98	0	0
1386	442.3	18.584	0	1063.65	3814.9	0
1387	391.2	18.598	1165.35	1076.4	755.085	4974.67
1388	484.3	18.602	0	0	5890.35	344.964
1389	441.4	18.637	23118.2	32173.1	64816.2	13814
1390	440.4	18.6448	123656	137407	171763	135332
1391	484.4	18.6562	187.474	4608.55	3949.98	1253
1392	441.3	18.67	19986.6	4886.1	14841.4	42185.8
1393	442.5	18.673	1058.03	1602.99	2687.52	633.759
1394	391.1	18.8488	0	2409.28	355.872	3061.28
1395	544.3	18.8488	0	2233.43	2179.92	4114.09
1396	371.8	18.895	4958.23	0	0	0
1397	152.3	18.903	463.85	1168.28	4522.58	2849.88
1398	441.5	18.9143	3910.25	0	0	0
1399	152.1	18.9393	1702.13	8275.92	1857.83	2471.34
1400	440.3	18.9567	3149.45	3601.19	0	11803
1401	397.2	18.9717	3961.65	2532.81	3740.18	281.161
1402	223.1	18.9923	414.315	7450.78	2509.09	1353.62
1403	359.4	19.045	0	0	681.291	3719.23
1404	638.1	19.0692	2287.66	0	0	516.495
1405	426.4	19.08	0	750.802	4033.9	535.704
1406	261.2	19.08	0	662.509	3460.66	0
1407	622.3	19.0812	3117.38	1705.14	1282.13	5230.93
1408	584.5	19.134	293.023	0	3455.92	0
1409	466.3	19.169	1023.04	0	3680.18	1290.13
1410	390.1	19.204	0	0	3518.06	0
1411	540.4	19.258	109404	151298	316422	189456
1412	584.4	19.258	0	705.174	5690.45	1907.75
1413	541.5	19.2652	9179.23	0	15871.1	14019.7
1414	542.4	19.2665	4107.4	9518.48	22615.3	6544.03
1415	151.8	19.276	608.013	268.55	0	2821.59
1416	541.4	19.2845	26199.8	56165.6	95933.3	48689.1
1417	152.2	19.293	3266.07	2885.79	0	704.001
1418	390.2	19.293	0	0	4747.74	1082.35
1419	390.4	19.382	0	0	5658.34	235.864
1420	370.9	19.3822	0	6992.83	0	1157.99
1421	301.3	19.4498	4613.58	0	0	0
1422	376.1	19.47	290.768	216.41	4553.92	576.229
1423	481.2	19.4857	1222.95	183.026	0	4429
1424	392.9	19.506	0	0	6751.03	0
1425	439.4	19.5597	0	3741.02	0	1719.63
1426	579.4	19.5958	1805.78	5002.93	2487.41	3437.11
1427	378.3	19.612	1610.57	220.889	11024.6	5787.96
1428	578.5	19.612	2043.6	5613.41	10175.8	2256.67
1429	152.1	19.6128	3000.86	0	457.92	1271.87
1430	371.9	19.6602	0	2056.15	2051.78	3539.78
1431	578.3	19.6602	0	1878.02	483.756	7411.66
1432	355.3	19.6709	4711.23	8598.92	35045	34916
1433	541.3	19.701	0	0	2894.28	0
1434	393.2	19.701	24858.7	18709	58899.3	34228.4
1435	540.3	19.701	1903.52	452.093	8198.88	886.26
1436	551.6	19.701	0	0	2714.66	795.635
1437	377.2	19.712	11713.2	16139.7	20773.9	60612.6
1438	600.5	19.7163	4781.06	675.064	1700.13	190.388
1439	392.3	19.736	955.957	0	18398.4	787.807
1440	578.4	19.7493	17179.3	11296.5	4770.86	3975.79
1441	337.2	19.754	422.393	173.307	4451.04	0
1442	579.3	19.7572	3132.41	2997.16	0	513.714
1443	336.4	19.772	0	0	15288.7	2265.17
1444	578.2	19.7812	0	0	0	2533.3
1445	392.2	19.7812	263.833	0	0	5320.78
1446	376.4	19.789	0	0	24365.9	7038.86
1447	399.2	19.789	1194.05	0	5220.33	0
1448	336.3	19.7977	244.107	217.744	4981.84	8164.47
1449	455.4	19.8024	516.145	4389.44	1258.28	4776.1
1450	383.4	19.825	2938.16	2735.16	11042.5	1350.19
1451	439.2	19.8311	4948.66	34630	15173.8	3989.92
1452	440.1	19.8328	0	963.774	0	3046.56
1453	440.3	19.843	4788.68	4555.06	20708.4	6249.02
1454	378.4	19.845	547.678	4176	0	0
1455	399.4	19.878	0	0	4917.1	0
1456	336.2	19.896	0	222.442	5686.03	685.924
1457	523.3	19.8982	0	7869.44	338.67	190.328
1458	395	19.9018	697.692	665.317	2053.22	2714.47
1459	439.3	19.9138	44643.3	8838.88	83530.6	23128.8
1460	455.3	19.9148	8990.92	4515.6	8567.59	3280.08
1461	356.3	19.9163	0	4480.58	804.267	2561.76
1462	394.3	19.9163	855.004	5105.76	0	1468.06
1463	383.5	19.931	0	0	5223.94	358.526
1464	507.3	19.9333	3175.63	11038.9	966.799	2509.12
1465	551.5	19.9358	0	1027.83	2044.8	2964.19
1466	455.2	19.9358	0	536.684	0	2588.83
1467	374.4	19.9439	0	5906.49	601.725	4836.97
1468	508.2	19.9513	0	3903.87	0	414.79
1469	241.1	19.9532	600.104	1790.72	476.055	3703.39
1470	366.2	19.9532	188.265	0	581.383	5217.43
1471	373.2	19.9532	0	1260.12	4175.14	3379.89
1472	377.3	19.9532	36421.5	70603.1	106570	211425
1473	399.1	19.9647	3699.2	320.827	0	212.395
1474	379.1	19.9707	0	0	0	2914.35
1475	374.9	19.984	1361.26	1273.06	6358.01	248.797
1476	378.3	19.984	2611.46	10554.9	32513.5	18824.7
1477	445.2	19.9953	197.617	1219.74	3267.98	2646.5
1478	355.3	20.0131	15277.3	14837.2	8701.61	22218.6
1479	569.3	20.02	0	0	2776.14	556.336
1480	523.1	20.0263	3880.53	1010.3	0	248.39
1481	337	20.038	0	0	2516.21	0
1482	440.2	20.055	1723.06	801.408	5509.85	0
1483	439.4	20.0577	0	6316.21	0	0
1484	280.2	20.0735	0	0	474.144	3028.08
1485	377.2	20.0738	90414.5	52665.6	73285.1	60146.9
1486	355.1	20.0758	0	5561.95	0	0
1487	301.2	20.108	12696.8	16136.8	18549.1	16657.3
1488	337.1	20.1088	2745.4	0	1021.87	635.618
1489	378.2	20.1088	15172.4	11192.1	8081.97	12428.4
1490	523.2	20.1088	4253.48	3022.16	2445.42	443.18
1491	302.2	20.144	629.946	2297.18	4241.86	1628.96
1492	279.3	20.147	0	12497.5	4139.57	0
1493	279.2	20.1522	3937.09	325.006	19639.8	20351.6
1494	356.3	20.1702	5558.34	837.229	314.456	871.485
1495	671.5	20.179	0	0	4055.78	2467.45
1496	359	20.183	0	3701.69	0	0
1497	409.3	20.2113	1070.8	1406.16	880.398	3979.9
1498	376.5	20.215	0	0	5257.76	0
1499	295.4	20.218	0	3074.97	1149.17	0
1500	317.2	20.2237	3193.45	17387	5106.1	10277.9
1501	378.3	20.2313	6957.64	2681.9	1684.83	10138.9
1502	439.2	20.2313	13217.6	0	5518.15	5160.12
1503	372.2	20.2313	6944.42	0	0	4090.79
1504	427.3	20.2627	244.01	867.427	2715.6	4335.75
1505	359.1	20.2627	0	838.633	0	7203.76
1506	422.4	20.268	365.456	0	3327.34	2204.64
1507	409.2	20.2695	864.024	4148.11	4814.74	2799.45
1508	279.1	20.3127	11494.5	0	2275.58	2001.53
1509	318	20.3142	0	0	0	2493.12
1510	295.2	20.3142	0	0	750.07	4926.34
1511	317.3	20.3482	9651.81	5537.58	1776.56	10901.4
1512	424.3	20.3876	0	2992.83	9098.67	3584.06
1513	425.4	20.4007	0	2196.22	2374.95	2938.67
1514	374.4	20.41	1595.19	5900.28	7921.96	8328.86
1515	295.3	20.4142	3919.45	2035.09	1992.2	0
1516	378.3	20.4333	5445.02	2575.56	2093.83	832.261
1517	554.3	20.4348	229.886	1502.76	968.263	4288.75
1518	352.4	20.481	0	0	7919.35	0
1519	469.2	20.481	0	0	2286.59	0
1520	279.2	20.481	1121.33	2447.81	9493.41	3735.31
1521	413.1	20.481	0	0	2509.8	552.343
1522	726.6	20.498	0	0	3617.71	0
1523	554.4	20.5174	1988.86	14979.1	24660.9	14431.8
1524	393.9	20.5182	0	4204.66	0	0
1525	394.2	20.534	3511.89	0	5508.18	2977.33
1526	453.3	20.5538	2391.09	9711.65	9299.58	3144.91
1527	725.6	20.569	0	0	7938.58	0
1528	352.3	20.569	0	494.029	13008	2674.81
1529	374.3	20.5712	1338.8	1909.36	103002	11778.7
1530	555.5	20.5885	2220.94	4986.93	4065.95	484.484
1531	392.4	20.591	0	0	0	2612.33
1532	317.1	20.591	4221.98	4240	1686.96	2904.96
1533	424.2	20.605	0	463.571	2525.2	861.619
1534	453.4	20.6242	0	2379.5	0	0
1535	555.4	20.625	4994.37	2890.62	11442.7	9722.61
1536	317	20.64	568.759	2538.11	2745.4	0
1537	377.3	20.6707	34380.8	11446.1	19038.7	16092.8
1538	468.5	20.7208	4829.92	59613.2	0	36690.8
1539	554.5	20.729	3234.61	6707.69	8998.97	2226.08
1540	469.5	20.7549	16541.6	10835.6	18288.6	14908.8
1541	469.4	20.8024	6528.07	18742	23946.7	26307.6
1542	470.5	20.817	171.234	0	3611.25	1037.57
1543	468.4	20.8172	23613.8	26132.9	182557	61929.7
1544	377.1	20.8685	0	2716.78	0	1678.43
1545	453.3	20.9402	1468.07	0	619.44	3377.16
1546	554.4	20.9902	5263.11	0	1454.79	0
1547	580.5	21.001	2475	12394	2498.13	1319.8
1548	469.3	21.012	0	1515.78	5051.9	0
1549	622.3	21.012	0	0	2863.15	896.83
1550	375.1	21.048	187.935	0	9756.6	2576.51
1551	354.3	21.0638	5677.22	3259.11	7538.09	11214
1552	353.3	21.0734	3340.75	7341.57	39288.8	19012.4
1553	354.2	21.075	5847.25	13698.1	3540.48	1899.39
1554	580.4	21.075	0	3387.7	1817.95	589.555
1555	359.1	21.083	0	0	5297.28	2201.79
1556	331.4	21.0925	271.794	10269.9	4054.4	0
1557	369.2	21.0972	559.925	5437.8	9018.57	3229.39
1558	497.3	21.11	0	4573.9	1390.54	8216.58
1559	331.3	21.1167	1887.66	6253.92	4930.59	15697.2
1560	496.4	21.119	1991.94	1506.31	4871.4	1959.83
1561	623	21.136	0	0	2894.67	0
1562	282.4	21.1438	0	2278.04	548.475	0
1563	481.2	21.172	2102.62	0	20255.2	7285.34
1564	497.2	21.227	9243.16	4020.94	11620.2	14226.1
1565	497.1	21.23	0	4895.08	0	0
1566	375.3	21.26	1332.13	1040.17	6322.13	1046.03
1567	369.3	21.2688	12083.8	1401.03	1177.25	3598.63
1568	360.3	21.277	1408.88	1565.98	958.697	2828.21
1569	357.1	21.278	0	0	4191.9	0
1570	569.5	21.295	0	37603.7	72466.2	36876.4
1571	411.4	21.296	0	0	8791.64	2542.15
1572	497.3	21.3047	6228.48	5578.47	8172.6	28398.9
1573	379.3	21.3122	0	16702.7	25853.4	25667.8
1574	151.9	21.3162	0	3023.51	0	271.834
1575	366.4	21.3302	0	897.809	282.48	3518.06
1576	570.5	21.331	978.61	378.899	9126.06	1628.56
1577	395	21.3333	4424.01	0	0	3819.17
1578	468.2	21.3497	3222.16	0	1091.88	0
1579	357.4	21.35	0	4343.58	0	0
1580	468.3	21.3833	5943.51	1365.2	10752.3	9408.93
1581	568.5	21.3849	24366.2	91667.7	237328	71741.2
1582	381.1	21.385	0	847.558	2265.23	661.636
1583	353.1	21.4012	0	7779.31	0	0
1584	570.4	21.4185	1418.08	5648.97	4353.42	1244.85
1585	451.4	21.4185	0	4909.92	820.05	0
1586	481.1	21.4285	2691.36	0	0	0
1587	378.4	21.4698	0	3429.84	500.76	220.186
1588	305.2	21.4727	0	1135.5	2574.95	4018.42
1589	263.3	21.4727	0	885.93	0	4144.8
1590	569.4	21.4733	23924.8	27474.9	21396.9	9437.51
1591	283.3	21.481	1833.7	4347.09	8048.58	2446.24
1592	331.2	21.4872	1081.34	5767.72	0	0
1593	388.3	21.4908	1562.49	1201.86	2240.82	2747.37
1594	481.3	21.4908	4551.4	9562.46	23277.9	54823
1595	483.2	21.4908	666.958	0	2407.96	3322.55
1596	380.2	21.491	2357.7	3280.53	5932.74	0
1597	365.3	21.5047	4709.26	20815.4	51662.1	10556.3
1598	413.3	21.5047	262.326	3440.05	1801.72	415.726
1599	656.5	21.5047	0	4433.24	503.388	2904.93
1600	282.3	21.5063	31944.7	45243.3	14872.9	17139.1
1601	353.3	21.5078	50051	7946	28879.3	21618.4
1602	369.4	21.509	0	1063.48	5285.59	0
1603	509.4	21.509	0	0	2883.33	1619.67
1604	622.4	21.509	0	0	5638.16	1702.87
1605	281.2	21.5153	114545	176652	69745.9	81779
1606	331.4	21.5169	1137.09	0	3435.76	6899.81
1607	283.2	21.5212	4664.04	5268.19	1399.72	4258.3
1608	380.4	21.5258	0	5397.35	799.815	12220.4
1609	463.2	21.5258	0	549.954	1512.69	3777.38
1610	465.4	21.5258	0	455.985	734.784	4356.6
1611	482.3	21.5258	17708.2	12585.6	51638.5	74937.1
1612	543.6	21.5258	0	1103.16	0	5990.62
1613	441.3	21.526	0	493.187	5267.49	2147.54
1614	451.2	21.526	294.57	3825.67	8200.16	2692.24
1615	475.4	21.526	0	414.464	3686.68	812.362
1616	495.4	21.526	181.153	1915.85	4817.93	4299.94
1617	627.4	21.526	21249.7	14671.4	6744.78	7663.97
1618	303.2	21.535	156228	96818.6	139504	166455
1619	562.5	21.5385	2787.25	7285.67	3878.54	13503.6
1620	369	21.5385	181.106	3499.06	0	0
1621	263.2	21.5416	7743.97	11601	19498.3	10145.6
1622	341.1	21.544	0	2518.13	4981.01	931.302
1623	569.5	21.544	11001.7	0	51073.5	17813.3
1624	568.4	21.5493	49074	35791	117041	25853.9
1625	759.6	21.556	283.962	3139.27	4129.76	783.692
1626	303.3	21.556	2409.4	36827.8	0	0
1627	467.3	21.5578	4720.08	1291.69	13857.8	5273.58
1628	325.2	21.561	25989	17336.1	17417.9	27932.4
1629	561.5	21.561	29921.6	10556.8	20610.7	24926.6
1630	671.5	21.561	8134.57	9342.84	3982.76	10590.3
1631	304.2	21.5615	37588.4	27160.3	35554.2	42492.1
1632	365.2	21.5618	25397.7	16433.3	5452.96	13296.7
1633	366.2	21.562	1289.92	871.947	6440.35	412.326
1634	395.1	21.562	1162.09	0	9228.36	2262.5
1635	600.5	21.5678	0	6693.46	8003.77	6920.84
1636	495.3	21.5723	2648.63	6672.08	3119.58	4953.04
1637	543.5	21.579	6130.56	2751.94	7187.32	320.579
1638	627.5	21.579	4340.21	7258.49	8744.78	6266.99
1639	655.5	21.579	5601.9	1341.52	6404.15	7191.29
1640	672.5	21.579	3511.22	4537.9	5584.75	2519.76
1641	688.5	21.579	11213.1	3968.18	6200.43	13015.4
1642	369.1	21.579	523.398	0	3581	0
1643	622.5	21.579	0	0	13322.9	1867.73
1644	366.3	21.585	9256.5	327.209	1672.04	3480.17
1645	544.5	21.5853	905.856	3470.65	1088.69	7060.23
1646	369.3	21.5917	6407.14	0	1277.55	7534.8
1647	628.4	21.5918	4712.76	1061.74	4546.19	1477.1
1648	301	21.597	0	0	4213.26	0
1649	353.2	21.597	5613.39	0	5427.88	13529.9
1650	263.1	21.597	226.158	0	0	9903.43
1651	648.3	21.597	0	0	5862.24	333.425
1652	599.5	21.6026	10771.9	0	5226.86	22231.8
1653	357.3	21.6073	7462.17	15121.7	35866.4	21370.4
1654	485.4	21.615	0	0	3430.89	0
1655	451.3	21.615	10295.4	7936.66	20740.4	14115.7
1656	465.3	21.615	1126.43	2145.89	6962.78	6759.76
1657	621.5	21.615	1080.42	1195.06	2565.02	0
1658	687.5	21.615	22507	16689.5	22589.5	20623.5
1659	760.5	21.615	2764.05	1241.04	3666.35	3481.36
1660	341.2	21.6168	4034.22	747.977	940.395	1208.27
1661	282.2	21.6192	23245.9	9280.92	21814.1	21232.9
1662	305.1	21.6196	2090.88	3313.15	0	0
1663	339.2	21.624	390.807	1790.04	4524.13	2470.63
1664	397.2	21.6248	4728.65	3983.82	2216.95	4432.08
1665	440.3	21.6248	0	3064	4819.02	3708.31
1666	381.1	21.6322	463.611	536.187	0	5412.29
1667	481.2	21.6322	12906.6	11263.8	27383	33236.6
1668	561.4	21.6322	4785.25	4033.38	0	8882.02
1669	682.5	21.6322	241.423	795.204	2603.92	2984.13
1670	747.3	21.633	0	220.225	3117.86	0
1671	628.5	21.635	6701.31	161.709	1205.58	4948.75
1672	365.4	21.6382	10728.3	0	0	6452.16
1673	681.6	21.6413	2372.74	3152.74	0	1842.34
1674	331.1	21.6442	3870.93	0	0	1770.18
1675	543.4	21.6448	8075.73	1786.73	0	5205.87
1676	509.1	21.65	300.023	0	2391.25	0
1677	388.2	21.6501	887.014	2242.13	6854.4	3640.54
1678	396.2	21.6502	941.055	1270.73	642.436	4259.86
1679	379.3	21.6591	112144	130743	119997	106260
1680	562.4	21.6623	7120.08	0	4961.86	0
1681	479.2	21.6624	2586.71	4286.3	13044.6	1099.84
1682	689.4	21.668	4203.69	900.415	6256.65	0
1683	628.3	21.6682	671.247	2427.12	0	4109.89
1684	659.5	21.6682	0	3310.83	2217.12	4308.26
1685	451.4	21.6702	7911.84	0	0	0
1686	467.4	21.6702	2332.51	1397.69	2168.76	1213.59
1687	689.5	21.6702	5475.96	4070.16	0	2874.39
1688	759.5	21.6702	5268.27	1186.78	4055.56	3701.94
1689	380.3	21.6814	16978.9	18416.4	49094.3	15853.1
1690	688.4	21.6839	4326.47	3757.7	4668.07	2487.72
1691	407.3	21.6852	4459.42	3343.01	873.6	3190.12
1692	396.1	21.686	663.103	2676.69	5607.63	4325.86
1693	281.3	21.6927	98826.7	40263.2	70913.1	73176.2
1694	496.2	21.6937	803.19	3419.56	292.5	422.831
1695	681.5	21.6973	10533.6	7808.61	10236.5	20976.2
1696	248	21.7013	3519.12	1650.88	820.224	3798.65
1697	380.2	21.7032	8479.26	5621.63	1170.44	19846.7
1698	385.4	21.7032	0	0	264.845	3192.72
1699	599.4	21.709	15702.5	21825.9	17376.4	9216.5
1700	600.4	21.709	10223.9	2137.53	1844.58	4260.21
1701	396.3	21.709	3593.06	2336.54	0	0
1702	495.2	21.721	7759.92	1119.99	1608.53	957.417
1703	622.3	21.721	136.164	0	6802.29	451.169
1704	478.5	21.7212	172.146	1410.31	0	6263.26
1705	370.9	21.7327	5829.12	0	0	0
1706	358.2	21.7327	4758.42	492.618	1132.08	879.153
1707	344.2	21.739	0	724.392	3937.07	898.447
1708	509.4	21.739	1688.4	164.74	2749.83	237.566
1709	357.2	21.7392	2203.33	988.947	3135.26	6162.36
1710	483.4	21.743	2152.02	0	0	0
1711	413.3	21.743	10618.7	5300.82	4141.55	3530.4
1712	479.3	21.7523	22761.9	27706.4	18073.1	23301.8
1713	568.3	21.7523	9905.7	1341.25	1107.7	0
1714	467.2	21.757	235.768	0	3794.4	2417.89
1715	354.4	21.774	637.002	0	6517.37	582.635
1716	484.3	21.774	2032.85	2220.54	3528.31	8014.44
1717	676.5	21.774	2834.44	850.962	561.8	0
1718	413.4	21.774	0	646.971	0	3223.46
1719	682.4	21.7865	5198.26	976.678	332.674	1476.31
1720	671.3	21.792	0	0	2568.93	824.224
1721	346.2	21.7985	2190.47	644.146	0	0
1722	687.3	21.8268	0	0	0	5877.59
1723	376.3	21.845	1565.31	0	39124.9	4095.53
1724	248.3	21.8488	615.5	2801.56	801.36	1511.39
1725	484.5	21.8498	3010.69	268.664	0	0
1726	263.3	21.8509	4390.21	1014.99	309.291	5075.79
1727	304.3	21.8538	6808.03	0	0	2863.71
1728	479.4	21.8564	12444.4	775.906	7509.09	1656.45
1729	495.1	21.8627	0	1511.95	0	7283.22
1730	344.3	21.863	832.008	0	3634.74	2474.53
1731	440.5	21.8632	2723.14	0	0	0
1732	357.1	21.8632	4313.84	235.959	0	352.813
1733	379.2	21.8632	62068.5	9392.4	47318.8	34880.6
1734	481.2	21.8632	5994.91	0	2686.04	0
1735	393.9	21.8767	2480.96	0	0	0
1736	381.3	21.8767	3075.55	806.02	2492.4	540.839
1737	569.2	21.8897	3875.54	7239.85	5299.42	0
1738	554.2	21.9008	156.37	3851.43	2057.09	2625.75
1739	380.1	21.9035	6007.66	0	0	0
1740	413.1	21.9035	2936.2	0	0	0
1741	282.3	21.9094	15469.5	6595.37	9830.36	2786.59
1742	495.3	21.9185	4903.46	4520.33	2152.86	1651.49
1743	376.4	21.9234	2344.26	609.491	12873.3	20773
1744	569.3	21.9333	0	1584.56	5107.08	9161.1
1745	482.2	21.9362	684.314	16293.6	0	4641.55
1746	483.1	21.953	0	4591.33	0	1101.66
1747	553.2	21.9593	13443.4	6009.94	13846.8	8397.06
1748	483.3	21.9629	3273.87	0	7806.93	4852.84
1749	263.1	21.969	2047.85	460.125	4268.71	558.092
1750	498.3	21.969	2049.86	312.442	5740.35	1981.6
1751	481.3	21.9698	95138.6	65839.8	180255	104397
1752	695.4	21.9738	4727.47	1385.71	0	1701.67
1753	482.4	21.9813	6636.14	0	25387	0
1754	392.3	21.9858	0	563.047	2110.25	6040.94
1755	570.2	21.987	1107.62	561.463	2647.88	0
1756	482.3	21.9984	11980.5	3271.66	35420.3	15778.8
1757	381.4	22.0025	2917.54	0	0	880.831
1758	477.3	22.0037	134.756	181.269	0	3622.48
1759	479.3	22.0062	5879.06	13609.6	7790.02	8484.41
1760	303.2	22.0323	60456.5	24765.6	58415.5	49952.2
1761	377.2	22.0323	4583.59	753.034	7251.87	0
1762	483.2	22.0323	8320.69	1732.85	1078.08	1609.09
1763	411	22.0587	0	2969.35	0	0
1764	675.4	22.0618	3592.96	677.261	1566.16	1604.45
1765	376.3	22.076	2520.55	3474.98	47323.4	5113.75
1766	420.3	22.076	0	3904.97	5877.6	6414.48
1767	435.2	22.093	423.771	0	4712.62	1109.92
1768	480.2	22.093	2794.97	0	3521.2	373.658
1769	569.1	22.111	407.846	0	2691.34	0
1770	481.4	22.1112	2093.14	32474.6	4791.9	0
1771	420.2	22.1265	4705.53	5963.81	4457.6	10521.2
1772	419.2	22.146	4850.74	22707.9	19142.1	18755.7
1773	479.2	22.1612	246.087	460.222	739.11	3207.07
1774	303.3	22.1612	6997.68	0	0	13285.5
1775	436.3	22.164	643.594	4396.68	1407.93	2502.13
1776	419.3	22.1665	43357.2	12448.6	53416.9	48547.8
1777	248.3	22.182	0	0	2927.93	1955.76
1778	281.1	22.1957	0	0	0	10833.8
1779	435.3	22.2313	3684.38	4008.61	7520.97	6173.07
1780	111.2	22.2528	469.032	5291.95	1111.47	3541.92
1781	110.9	22.268	2957.29	0	0	0
1782	420.4	22.2835	1491.58	1666.44	534.617	3890.54
1783	379.4	22.2969	793.627	2869.74	5611.61	0
1784	497.4	22.3177	4566.48	744.136	2241.08	1894.75
1785	152.1	22.3358	2931.09	2799.66	1094.37	5886.94
1786	281	22.351	2447.81	0	0	793.731
1787	435	22.3535	0	0	0	2549.18
1788	450.4	22.359	1124.54	378.583	3862.49	387.721
1789	423.2	22.3713	229.216	558.569	0	3260.34
1790	452.5	22.3713	2797.71	2991.72	0	3516.02
1791	395	22.3826	0	0	2382.71	3531.27
1792	452.4	22.395	3703.61	3365.14	16290	4212.12
1793	392.4	22.458	0	0	1250.8	2769.7
1794	435.1	22.4757	2029.28	798.28	2468.09	8296.36
1795	419.4	22.5555	1439.21	2812.13	0	0
1796	377.4	22.572	0	0	9742.15	0
1797	300.9	22.609	0	2632.62	0	0
1798	281	22.6142	2674.38	219.019	0	0
1799	435.3	22.6155	1361.75	2342.97	2231.05	3878.54
1800	582.6	22.6273	0	4935.74	0	0
1801	285.1	22.643	0	2458.23	2594.59	630.733
1802	409.2	22.643	2877.04	794.308	3384.53	1271.93
1803	455.4	22.6627	4128.06	3228.56	0	4712.71
1804	419.1	22.6853	0	0	1097.9	8905.06
1805	581.2	22.687	2743.49	0	1770.03	170.366
1806	583.5	22.7008	793.472	8818.2	4038.6	4704.28
1807	399.1	22.7057	4304.57	0	0	0
1808	411.2	22.7057	10452.1	0	0	970.286
1809	456.3	22.714	3522.73	1301.1	7776.63	3402
1810	286.3	22.7273	3294.78	564.849	2921.36	0
1811	727.6	22.7331	0	3365.01	9092.16	287.807
1812	419.4	22.7347	0	3011.76	0	0
1813	582.5	22.7347	2944.32	14066.9	24672.1	13841.6
1814	474.4	22.7347	1717.87	4118.57	0	0
1815	583.4	22.7374	5497.92	1408.12	9701.76	2732.36
1816	471.4	22.7375	0	761.496	2388.05	2717.84
1817	441.2	22.7375	0	0	1466.36	3967.58
1818	727.4	22.7377	3244.41	3173.69	0	0
1819	285.2	22.7384	12619.5	14999	3010.4	4935.32
1820	728.5	22.742	6030.02	1549.91	1913.43	2046.63
1821	711.6	22.7424	419.293	6335.89	2235.32	1953.18
1822	435.4	22.749	0	0	5135.43	0
1823	285.3	22.749	29869	11413	21010.8	6685.78
1824	412.2	22.7528	1398.11	8565.57	463.22	0
1825	559.3	22.766	12479.3	15004.7	4072.57	3804.74
1826	560.2	22.7712	0	3216	1883.41	494.33
1827	286.4	22.7712	0	3904.29	0	200.776
1828	433.3	22.7718	4120.48	4807.1	5547.93	7172.69
1829	828.3	22.7718	0	0	198.09	2153.09
1830	581.4	22.7785	2967.11	2594.86	3117.49	5747.64
1831	597.3	22.7785	6443.25	661.983	1242.72	1880.15
1832	475.3	22.7808	3619.59	1076.09	8041.81	1904.55
1833	389.2	22.785	1192.48	0	2354.88	1033.12
1834	381.4	22.785	1430.07	0	3262.39	0
1835	457.1	22.7895	0	0	0	2455.2
1836	849.4	22.7895	0	0	0	4401
1837	412.4	22.7895	2626.51	0	3617.8	9152.04
1838	491.3	22.7895	0	0	1547.6	4087.24
1839	827.5	22.7895	0	0	995.094	5402.21
1840	582.4	22.7918	18311.3	1437.73	16307.3	5296.22
1841	271.3	22.7958	516.945	200.574	3959.1	3930.48
1842	359.1	22.7975	6073.72	1486.28	0	3104.69
1843	455.3	22.7975	13035.6	9145.85	16827.2	1865.66
1844	286.2	22.7975	3013.58	0	1487.72	0
1845	579.5	22.7975	2652.67	1140.64	0	0
1846	457.3	22.802	8485.86	5288.63	5616.24	711.393
1847	471.3	22.802	4429.94	2508.25	6689.06	3203.56
1848	522.4	22.802	0	1001.03	4325.81	0
1849	579.3	22.8073	1615.09	1986.78	0	7574.28
1850	441	22.82	0	0	2752.24	0
1851	475.5	22.825	0	0	0	3087.6
1852	342.2	22.825	644.892	693.264	1377.05	2238.53
1853	465.1	22.825	0	0	201.4	3070.59
1854	449.2	22.8333	5658.32	9959.83	3720.69	8350.67
1855	411.3	22.8379	40710	42648.1	147877	92628.8
1856	434.1	22.838	0	0	2666.8	0
1857	711.5	22.8392	2884.72	560.05	4581.32	5549.33
1858	412.3	22.8396	8683.31	8540.91	23518	15039.9
1859	413.3	22.8417	3789.75	3482.03	8957.71	10835.8
1860	334.4	22.8417	0	208.908	0	4646.59
1861	521.4	22.8533	4295.79	948.561	6394.3	2771.94
1862	335.3	22.856	1017.38	0	5752.18	713.585
1863	844.6	22.856	246.3	1428.96	4201.51	1574.19
1864	579.4	22.8568	1401.14	2080.39	9040.62	3539.34
1865	378.4	22.8595	568.931	280.727	0	3965.24
1866	433.2	22.8595	0	0	3693.04	5909.49
1867	727.5	22.867	3514.6	3228.58	7648.83	10650.9
1868	449.3	22.873	3556.36	3385.18	13044.4	7473.08
1869	474.3	22.8749	7232.4	3985.34	14947.3	14057
1870	843.6	22.8751	0	1442.01	15665.1	5770.23
1871	301.2	22.8788	6057.09	8461.42	5175.05	6580.62
1872	373.1	22.891	10250.9	2815.61	10083.8	5676.51
1873	582.3	22.8915	2735.15	0	0	1433.08
1874	471.2	22.897	2253.45	6473.29	1304.14	2538.83
1875	434.3	22.9016	0	0	3459.6	2820.82
1876	712.5	22.9052	6039.26	929.297	2244.01	3461.25
1877	844.4	22.909	0	0	3633.34	0
1878	844.5	22.9117	441.833	188.866	1708.2	3595.44
1879	559.4	22.926	753.646	3229.26	2995.74	5583.02
1880	334.1	22.9293	0	434.248	0	2989.2
1881	413.2	22.944	2129.8	1230.91	8263.34	2268.86
1882	451.3	22.944	2123.58	385.348	7434.82	3039.68
1883	579.2	22.9478	3135.36	0	0	0
1884	285.4	22.951	1404.13	4631.92	1852.04	0
1885	356.3	22.962	175.583	460.226	25040.9	1597.48
1886	711.7	22.98	0	0	2373.1	504.799
1887	301	22.9865	0	3340.7	818.985	1087.18
1888	463.3	22.9927	0	4636.19	4497.07	11913.8
1889	334.3	23.015	517.006	424.173	115987	7034.22
1890	713.3	23.0433	2735.99	771.632	167.676	0
1891	393.2	23.077	0	7585.36	5891.42	0
1892	498.2	23.131	0	2528.1	0	0
1893	753.4	23.1382	3397.33	0	174.933	0
1894	449.1	23.139	0	0	4629.81	0
1895	373	23.139	911.169	0	4730.15	0
1896	284.1	23.1393	655.031	0	0	4434.13
1897	547.6	23.1577	6586.04	4138.86	0	1161
1898	438.4	23.175	192.753	541.119	5873.4	360.384
1899	566.4	23.1772	2754.05	0	0	1117.91
1900	378.2	23.1917	761.247	0	1282.93	3909.61
1901	356.4	23.192	0	0	11916.6	0
1902	565.4	23.1955	6668.46	0	2254.49	0
1903	474.4	23.2085	1211.54	829.701	1180.02	3242.67
1904	413.2	23.21	0	2856.58	3186.36	1532.72
1905	285.1	23.2215	1639.88	5533.23	696.42	0
1906	463	23.228	0	0	2973.7	0
1907	283.3	23.2312	80048.2	75688.7	53042.3	35860.7
1908	566.5	23.2345	4004.8	2412.61	3970.83	1480.45
1909	394.2	23.2345	3378.14	0	1262.03	0
1910	631.5	23.2384	7577.94	915.923	4143.91	5986.02
1911	265.2	23.2388	6131.39	5244.07	10051.4	0
1912	631.3	23.2388	1780.12	5457.94	0	0
1913	481.4	23.244	3543.75	0	890.674	6110.97
1914	548.5	23.2458	7631.45	5122.65	0	0
1915	335.3	23.246	415.533	0	7928.35	397.103
1916	327.2	23.2482	26088.1	9482.41	3284.15	17798.1
1917	305.3	23.2572	5247.58	12642.6	791.345	11696
1918	547.5	23.263	12699.8	7306.85	10463.6	12520.9
1919	327.1	23.263	0	0	11321.3	1462.35
1920	565.5	23.2677	9714.51	6607.31	11889	19226.4
1921	343.2	23.2725	2582.78	1537.6	1106.6	1285.04
1922	548.6	23.2787	0	0	0	6661.55
1923	412.4	23.281	2380.26	0	4150.08	521.647
1924	522.4	23.281	0	0	2505.89	1060.16
1925	521.4	23.2855	3889.49	3720.88	1443.94	1746.58
1926	283.2	23.2973	26398	17599.7	55439.6	94187.2
1927	691.4	23.2973	0	3476.67	10221.8	4667.34
1928	365.3	23.2985	2804.57	557.537	5365.63	903.651
1929	284.2	23.299	17710.3	0	29031.1	13102.6
1930	692.4	23.299	1126.57	719.754	6015.74	757.592
1931	356.3	23.299	0	0	15151	1882.4
1932	691.5	23.3023	2555.57	6559.33	0	2087.84
1933	265.3	23.304	0	3415.34	0	7633.06
1934	305.2	23.3053	23186.2	8577.21	30152.7	15816.4
1935	413.3	23.316	3033.73	2922.31	4750.29	0
1936	565.6	23.3228	6022.5	3589.34	0	0
1937	284.3	23.3245	5785.27	33081.2	10158.8	9632.22
1938	524.5	23.3392	178.605	2592.76	2913.29	3358.96
1939	692.5	23.349	5737.36	1649.98	1473.96	6464.58
1940	395.2	23.352	4083.74	3869.23	5185.52	3235.87
1941	691.6	23.3657	6803.35	0	0	4365.87
1942	327.3	23.4015	6405.22	9785.6	4518.33	5826.61
1943	399.4	23.405	484.574	0	4370.38	251.188
1944	284.1	23.467	9371.79	0	4386.41	0
1945	305.1	23.5088	0	4906.44	1013.33	2127.04
1946	305.3	23.529	6933.04	0	6777.84	2932.96
1947	395.1	23.5427	332.206	0	1333.38	3217.63
1948	481.3	23.5605	2279.78	1206.66	1686.96	3306.34
1949	284.2	23.599	739.237	2410.85	0	2983.04
1950	359.3	23.6525	10914	19952	17720.5	14198.8
1951	397.2	23.6707	315.775	5009.43	859.158	1937.26
1952	283.3	23.6843	7104.83	6668.12	16032.5	30848.3
1953	381.2	23.6843	2646.48	5571.21	6482.86	16796.1
1954	382.3	23.724	9783.14	6329.3	3669.65	0
1955	310.3	23.7307	731.448	4072.42	116119	11863.6
1956	365.4	23.7315	3649.07	1199	0	0
1957	332.3	23.7488	300.179	0	13110.3	2831.29
1958	283.4	23.7495	7049.87	0	0	0
1959	381.3	23.7495	37860	28029.7	28628.3	13557.1
1960	305	23.7553	839.112	0	0	2594.59
1961	422.2	23.76	0	0	3708.1	1097.11
1962	466.3	23.7735	1024.27	223.534	235.498	4584.11
1963	332.2	23.777	266.401	499.852	13179	352.567
1964	395.1	23.7905	1272.34	3296.32	1099.08	4741.92
1965	449.4	23.8087	0	0	0	6837.05
1966	382.2	23.8087	1897.65	2793.37	1373.26	8242.8
1967	437.3	23.8087	0	797.582	0	3110.86
1968	421.3	23.8112	10582.3	17421.3	29444.3	43700.3
1969	397.3	23.8138	2020.05	4010.79	545.246	2801.96
1970	481.4	23.8432	6889.48	1305.59	3126.84	2292.66
1971	450.4	23.8448	0	0	343.303	3122.58
1972	422.3	23.848	1142.45	2081.42	10363.6	7581.54
1973	376.4	23.8618	305.629	339.767	1571.08	6682.18
1974	421.2	23.862	10831.6	0	21632.9	4998.05
1975	437.2	23.867	1389.65	4814.08	3019.94	1850.51
1976	332.3	23.884	0	0	8608.26	1082.17
1977	373.2	23.885	383.417	2854.2	0	0
1978	437.1	23.8982	1447.28	662.608	843.464	3716.36
1979	409.3	23.9153	892.828	661.921	205.078	6254.03
1980	395.4	23.9153	0	0	488.66	4389.6
1981	382.4	23.937	722.183	498.792	3392	267.564
1982	381.4	23.972	0	738.286	3206.02	0
1983	511.3	23.99	0	233.819	2899.47	1072.79
1984	393.8	24.0052	0	0	0	2461.54
1985	395	24.0085	2734.08	0	0	0
1986	283.1	24.0623	3257.76	860.81	0	335.99
1987	479.3	24.0788	822.858	4363.3	8903.7	2246.39
1988	377.1	24.0953	641.182	0	0	3862.96
1989	479.2	24.0973	3228.76	574.517	2026.46	1964.75
1990	524.3	24.1315	30157.7	31947.5	31399.6	14893
1991	541.2	24.167	0	748.308	5074.89	285.155
1992	523.3	24.1762	49144	112982	153383	39826.3
1993	110.9	24.1848	0	2562.91	1235.52	0
1994	525.3	24.185	2190.29	917.156	9257.49	3550.71
1995	392.9	24.2027	1142.1	6565.52	0	2546.43
1996	525.2	24.2027	1029.62	3310.8	0	0
1997	524.4	24.2033	4969.62	0	13753.4	7630.66
[truncated: 521 more rows]

## Sheet: A. fumigatus-Eltrombopag
Supplementary Table 6 - Mass spectrometry data from metabolome analysis of pathogenic fungi treated with drugs.
Total metabolic ions								Inhibited metabolic ions (1)						Inhibited metabolic ions (2)
	M/Z	Re time	DMSO-1	DMSO-2	Eltrombopag-1	Eltrombopag-2			M/Z	Re time	DMSO-1	Eltrombopag-1			M/Z	Re time	DMSO-2	Eltrombopag-2
1	223.2	0.0991667	0	0	0	3154.53		1	546.4	28.5467	47260.9	0		1	451.2	7.42183	172668	0
2	245.3	0.0991667	0	0	0	2602.86		2	527.4	28.4961	40966.1	0		2	402.1	10.6081	64798.9	0
3	353.3	0.1	0	0	2090.59	0		3	377.3	28.7633	24477.9	0		3	303.3	21.6732	36827.8	0
4	261.2	0.205167	3250.71	506.032	0	0		4	551.2	13.032	18944.4	0		4	456.2	7.42292	21390.5	0
5	371.1	0.241	6207.1	10098.9	13129.6	7174.24		5	467.2	24.7793	18529.9	0		5	247.4	17.3602	20462.9	0
6	261	0.294	2709.7	2864.46	2332.35	1314.42		6	578.4	19.7265	17179.3	0		6	659.9	7.495	20385.6	0
7	245	0.295167	2106.64	1094.61	1618.02	3518.16		7	446.2	9.40192	16329.6	0		7	318.4	12.364	20364.3	0
8	365	0.481417	0	9224.47	0	5237.47		8	426	9.75367	16008.8	0		8	273.8	7.47767	16335	0
9	394.2	0.490833	2422.35	0	0	2517.28		9	606.3	12.0658	15339.3	0		9	883.9	7.44383	15166.4	0
10	205	0.507	1465.14	0	4409.6	1377.59		10	302	17.2913	14374.4	0		10	316.1	7.44383	14111.2	0
11	104	0.507	2851.61	753.433	0	0		11	547.4	28.5514	14364.1	0		11	454.1	13.6237	13682.8	0
12	394.9	0.507	2388.05	0	1961.73	0		12	591.2	16.076	14238.2	0		12	909.2	9.57067	13127	0
13	394.1	0.507083	762.531	5270.71	2585.63	3143.91		13	536.3	13.6708	11615.5	0		13	883.3	7.495	12832.8	0
14	433.1	0.508833	0	1663.97	0	2677.56		14	279.1	20.1737	11494.5	0		14	377.2	27.8195	11416.9	0
15	203	0.525	298.434	0	4951.26	2175.55		15	482	9.58758	11462.2	0		15	523.4	24.7333	10595.8	0
16	393.2	0.525	0	1739.94	6354.7	0		16	427.2	9.65233	11286.6	0		16	371.2	39.323	10127.8	0
17	111.2	0.526833	1133.24	0	404.46	4512.89		17	331.1	21.5672	10728.3	0		17	312.2	15.0722	9819.3	0
18	219	0.542	3298.3	1056.47	1081.99	1611.66		18	244.1	0.6055	10293.3	0		18	360.4	26.768	9774.26	0
19	260	0.543	329.803	349.399	3456.99	1535.2		19	575.2	13.6527	10287.3	0		19	307.1	9.2295	9016.53	0
20	381	0.543167	4705.22	7548.62	414.933	3737.29		20	497.3	11.5482	10219.5	0		20	547.4	28.5514	8718.62	0
21	206	0.560167	374.242	2786.41	0	668.117		21	568.3	21.7352	9905.7	0		21	309.1	9.60617	8475.76	0
22	269.2	0.560167	204.79	3198.94	0	0		22	370.9	16.187	9686.28	0		22	393.2	18.1348	8425.27	0
23	674.2	0.561833	0	0	0	3262.97		23	396.4	24.4945	9605.04	0		23	316.9	7.66617	8349.81	0
24	179	0.561833	178.317	241.832	2552.53	4312.58		24	371	13.1225	9544.04	0		24	384.4	12.5832	8257.92	0
25	450	0.561833	1142.98	651.066	0	3342.84		25	405.1	11.0737	9380.65	0		25	523.3	19.9235	7869.44	0
26	366.2	0.561833	0	160.326	0	3219.03		26	284.1	23.4738	9371.79	0		26	325.1	6.65767	7782.52	0
27	269	0.578	837.451	963.257	7037.05	2026.28		27	297.7	10.5297	9304.69	0		27	353.1	21.4142	7779.31	0
28	365.1	0.578	63105.5	41006.4	14702.5	44367.9		28	452.3	15.5713	9296.28	0		28	472.1	7.9245	7758.88	0
29	395	0.578	3864.73	2115.69	796.337	1323.39		29	542.1	10.4685	9221.73	0		29	551.1	13.0283	7651.6	0
30	427.1	0.578	169.384	1834.58	4314.31	2578.16		30	528.3	25.7815	8937.92	0		30	393.2	23.2297	7585.36	0
31	268.7	0.578	0	2391.36	0	343.858		31	318.2	12.6142	8684.61	0		31	640.3	15.3783	7569.46	0
32	535	0.578	0	2900.54	0	382.303		32	325.3	10.1265	8565.86	0		32	507	9.78567	7516.53	0
33	202.2	0.579	1450.95	0	4102.2	5387.32		33	587.3	12.1509	8461.41	0		33	370.9	26.2564	7510.1	0
34	101	0.58	8346.26	2599.47	6678.61	15651.2		34	302.1	17.274	8424.85	0		34	362.1	7.46133	7361.07	0
35	291.1	0.58	0	967.034	2830.77	5085.88		35	371	27.2322	8317.92	0		35	348	7.44383	7145.59	0
36	381.1	0.58	5932.59	1616.88	1592.16	6456.03		36	310.3	8.85067	8146.98	0		36	370.9	19.3807	6992.83	0
37	203.1	0.595167	5940.61	4566.03	8885.98	10830.8		37	532.4	27.9312	8012.79	0		37	449.3	28.4118	6954.27	0
38	280	0.595167	8950.89	2861.03	699.705	2669.27		38	451.4	21.568	7911.84	0		38	359.4	12.6223	6820.04	0
39	535.1	0.595167	2863.06	209.256	0	2823.19		39	370.9	37.4795	7844.46	0		39	857.6	13.315	6790.08	0
40	205.1	0.596	3045.24	8280.38	9722.7	8247.86		40	359.3	8.27067	7702.69	0		40	961.3	15.1262	6735.06	0
41	220	0.596	2751.31	1994.58	5807.68	2342.71		41	548.2	12.3788	7594.7	0		41	453.4	16.0367	6703.84	0
42	247	0.596	495.982	289.036	2608.06	400.052		42	393.2	40.9323	7452.05	0		42	205.1	0.596	6579.94	0
43	140	0.596	777.092	3052.53	0	0		43	941.4	15.0172	7432.97	0		43	392.9	11.7455	6536.16	0
44	255	0.596	522.619	0	3704.7	0		44	782.4	10.5857	7271.5	0		44	316.3	2.87208	6497.89	0
45	366	0.596	1190.47	4841.67	0	0		45	547.3	11.9225	7195.5	0		45	393	14.8805	6362.07	0
46	450.2	0.596	0	6579.94	443.04	0		46	283.4	23.835	7049.87	0		46	412.2	22.9063	6335.89	0
47	329	0.598	631.346	427.687	1254.9	2985.3		47	498.1	15.0945	6962.56	0		47	439.4	20.0923	6316.21	0
48	389	0.598	397.07	2106.71	482.537	3288.72		48	481.1	15.9463	6933.46	0		48	371.9	11.5847	6230.47	0
49	426.2	0.598	847.198	851.007	0	4636.69		49	316.3	2.87208	6926.4	0		49	317	7.437	6224.45	0
50	244.1	0.6055	1086.08	1513.41	6707.59	13566.2		50	113.1	0.633	6812.77	0		50	482.3	15.4323	5864.86	0
51	450.1	0.6055	10293.3	1794.22	0	5437.31		51	304.3	21.6862	6808.03	0		51	331.2	21.6047	5767.72	0
52	322.2	0.615	0	0	0	2724.47		52	628.5	21.6753	6701.31	0		52	355.1	20.1115	5561.95	0
53	124	0.615	2266.16	0	2755.2	4258.62		53	542.1	11.0045	6544.01	0		53	874.8	7.47767	5547.19	0
54	254.8	0.615	1333.3	0	0	4149.23		54	275.1	12.2737	6488.18	0		54	317.3	20.3093	5537.58	0
55	206.2	0.6225	0	2638.62	4272.86	606.442		55	736.3	6.23517	6457.1	0		55	285.1	23.3735	5533.23	0
56	113.1	0.633	0	4547.97	7478.96	3492.48		56	962.4	15.3063	6391.98	0		56	547.1	11.8703	5507.73	0
57	366.1	0.633	6812.77	1202.18	0	3550.94		57	161.2	37.1328	6332.89	0		57	293.3	15.041	5473.78	0
58	282.9	0.633	693.642	0	0	4010.97		58	260.9	15.9787	6218.41	0		58	631.3	23.3907	5457.94	0
59	113	0.648167	7053.49	400.837	2698.71	0		59	319.3	18.0705	6181.26	0		59	395.2	6.84617	5317.57	0
60	124.1	0.649	0	8920.87	1627.23	711.577		60	361.2	26.6953	6173.38	0		60	319.2	12.3608	5302.15	0
61	375.1	0.649	1412.13	5561.6	880.046	1712.77		61	713.3	6.19917	6122.95	0		61	297.4	10.6655	5301.5	0
62	307.1	0.65	0	0	4473.67	5372.93		62	721.9	15.094	6086.22	0		62	495.1	13.606	5211.19	0
63	279.9	0.651	2536.44	0	1555.02	5543.64		63	285.3	22.9343	6073.72	0		63	536.3	13.6708	5189.19	0
64	427	0.651	449.376	0	0	2737.98		64	565.6	23.4505	6022.5	0		64	281.7	7.47767	5158.02	0
65	244.2	0.666167	3112.16	0	0	0		65	413.1	21.957	6007.66	0		65	394.3	19.9427	5105.76	0
66	280.1	0.667	0	5170.13	921.225	924.499		66	357.1	21.902	5994.91	0		66	369.1	17.9867	5011.89	0
67	352.1	0.667583	195.776	607.509	5275.92	5028.87		67	498.4	15.5595	5943.6	0		67	940.3	14.9815	5006.5	0
68	267	0.6855	415.32	0	10675.7	15396.7		68	394.1	37.0347	5834.24	0		68	723.1	27.2983	4964.85	0
69	359.2	0.702	4123.93	2240.81	4325.86	3035.45		69	370.9	21.6983	5829.12	0		69	582.6	22.7805	4935.74	0
70	123.9	0.702	0	0	2514.34	492.839		70	937.1	11.021	5730.3	0		70	609.3	14.1338	4930.13	0
71	132	0.702	0	0	2597.96	565.544		71	595.3	12.0975	5705.77	0		71	497.1	21.3313	4895.08	0
72	267.1	0.703083	0	285.642	19889.4	9272.78		72	376.1	26.4623	5666.09	0		72	441.3	18.4986	4886.1	0
73	512	0.704167	0	0	0	3426.65		73	623.2	12.133	5598.7	0		73	939.4	18.5355	4865.98	0
74	113.2	0.704167	0	3028.94	901.638	5973.38		74	441.1	18.0616	5592.32	0		74	220	0.596	4841.67	0
75	340.9	0.72	0	0	3419.72	227.648		75	359.1	16.187	5541.85	0		75	883.4	7.63233	4805.28	0
76	152	0.737833	0	2792.7	0	0		76	138.1	2.8905	5530.67	0		76	542.1	8.8365	4695.7	0
77	182	0.739167	0	0	0	4492.43		77	394.2	5.276	5443.21	0		77	452.1	15.9071	4692.76	0
78	372.1	0.739167	2006.98	2143.8	2928.75	3562.85		78	371.2	38.076	5411.83	0		78	363.3	12.5456	4669.13	0
79	291	0.747083	2079.62	1421.94	10982.7	16656.6		79	331.4	21.1852	5404.75	0		79	380.3	25.3834	4661.33	0
80	284	0.755	0	178.361	8827.73	6400.44		80	357.4	21.4588	5393.29	0		80	275.2	8.28883	4607.53	0
81	306.9	0.757167	2430.78	615.201	3691.73	9615.35		81	400.3	8.44267	5348.76	0		81	483.1	22.0943	4591.33	0
82	559.2	0.757167	0	0	2745.6	7687.82		82	379.1	28.5367	5255.48	0		82	261.2	36.8328	4586.21	0
83	574.2	0.757167	0	0	1983.29	4312.19		83	371.2	17.1345	5220.66	0		83	310	9.49867	4576.39	0
84	269.1	0.774083	958.897	798.604	4251.19	10113.7		84	371.9	38.8177	5217.46	0		84	917.3	7.66617	4467.25	0
85	132.2	0.775167	819.115	0	2550.68	5358.3		85	445.1	9.61783	5216.54	0		85	639.2	15.686	4449.57	0
86	306	0.809	0	0	5143.17	3821.91		86	284	5.39633	5156.99	0		86	324.1	7.47383	4427.62	0
87	359.1	0.809	2024.79	0	3457.72	0		87	647.3	12.1158	5117.68	0		87	373	15.041	4394.72	0
88	373	0.826	1173.63	0	3314.2	367.733		88	360.3	36.953	5115.26	0		88	223.1	4.49317	4356.27	0
89	283.9	0.828167	0	0	0	6715.1		89	313.2	25.3872	5090.12	0		89	373.8	9.64542	4282.4	0
90	284.2	0.844	489.553	0	5024.4	0		90	380.4	28.514	5083.76	0		90	509.1	11.9417	4220.83	0
91	269.2	0.862	501.974	0	2984.22	910.202		91	421.1	7.40433	5072.76	0		91	429.1	25.9258	4220.08	0
92	101.2	0.862	0	333.603	2987.42	0		92	370.9	26.2564	5046.3	0		92	217.1	36.7567	4209.22	0
93	370.9	1.12583	0	9497.72	0	3497.53		93	997.4	13.4678	5011.05	0		93	393.9	20.5792	4204.66	0
94	373	1.163	1308.03	1988.73	2647.88	410.564		94	447	9.36233	4978.82	0		94	456.1	13.8688	4194.03	0
95	372	1.21833	4410.67	694.713	806.873	1414.5		95	495.4	13.1079	4966.09	0		95	537.1	6.8625	4180.15	0
96	111.2	1.234	0	499.636	3064.46	1170.96		96	279.3	17.3997	4963	0		96	378.4	19.8673	4176	0
97	393.2	1.3965	2586.7	0	0	2554.02		97	371.8	18.9547	4958.23	0		97	366.4	28.3175	4138.77	0
98	371.2	1.4115	3545.29	0	0	12357.2		98	359.4	17.1105	4932.02	0		98	537.4	25.6543	4129.13	0
99	392.8	1.46817	2248.22	0	0	0		99	390.1	13.049	4894.11	0		99	419.4	22.888	4118.57	0
100	160.9	1.571	178.002	0	3492.05	0		100	368.3	10.8195	4888.72	0		100	513.4	26.4504	4116.45	0
101	261.2	1.659	701.624	0	3883.84	0		101	393.2	9.66867	4887.66	0		101	394	3.03267	4115.21	0
102	152.1	1.862	8801.75	1603.52	3915.69	0		102	598.2	13.4439	4835.83	0		102	659.8	7.44383	4039.54	0
103	373.1	2.014	7770.35	1631.36	6696.87	646.416		103	455	8.36683	4823.09	0		103	297.3	18.004	4033.85	0
104	372.2	2.16817	2101.81	0	0	3877.68		104	394	14.7912	4779.54	0		104	430.2	24.5473	4014.41	0
105	316.3	2.23225	604.243	0	4731.28	3902.92		105	232.1	37.2285	4764.35	0		105	281.4	7.64967	4000.44	0
106	371.9	2.361	0	0	0	2934.62		106	879.5	24.6587	4757.28	0		106	498	15.1445	3984.71	0
107	223.2	2.74	781.12	0	2462.81	0		107	412.2	10.6068	4705.34	0		107	379.3	28.4655	3984.65	0
108	371.2	2.76233	15010.9	15999.8	11332.4	14259		108	372.2	5.66558	4704.54	0		108	286.4	22.9247	3904.29	0
109	317.1	2.83183	1054.58	413.751	0	6504.41		109	370.1	5.258	4668.24	0		109	508.2	19.9798	3903.87	0
110	316.1	2.86692	3181.57	1542.17	14035.4	0		110	770.6	15.058	4664.53	0		110	366.4	21.421	3890.79	0
111	316.3	2.87208	6926.4	6497.89	0	0		111	301.3	19.4397	4613.58	0		111	497.3	28.4383	3851.79	0
112	138.1	2.8905	5530.67	600.349	0	675.172		112	497.4	22.4386	4566.48	0		112	295.2	15.4322	3846.74	0
113	223	2.90033	1060.27	456.67	0	4122.68		113	675.4	12.961	4563.3	0		113	289.1	9.4085	3830.11	0
114	395	2.91783	4211.19	2994.49	379.14	4200.06		114	409.1	25.4427	4510.77	0		114	688.4	21.6613	3820.61	0
115	316.2	2.9355	6771.28	11147	29751.8	45702.6		115	436	11.801	4507.58	0		115	362.1	36.9092	3774.36	0
116	394	3.03267	1521.07	4115.21	1344.49	0		116	415.3	13.8607	4298.2	0		116	908.2	7.44383	3763	0
117	393.1	3.221	7944.53	3695.82	6642.13	0		117	551.3	14.9697	4154.71	0		117	521.4	23.4145	3720.88	0
118	152.2	3.308	701.781	0	3045.22	1926.01		118	377.1	30.6702	4154.71	0		118	359	20.2248	3701.69	0
119	152.1	3.414	2663.02	1311.17	4275.87	732.813		119	511.4	26.6708	4144.91	0		119	372.2	11.2607	3697.42	0
120	261	3.4795	3370.8	1084.38	0	0		120	497.2	8.4235	4142.86	0		120	393.1	3.221	3695.82	0
121	330.3	3.76867	0	764.798	2440.98	7203.66		121	455.4	22.8032	4128.06	0		121	612.1	14.584	3602.02	0
122	331.3	3.839	0	0	3120.64	0		122	111.2	16.4848	4091.73	0		122	151.9	13.4515	3570.14	0
123	151.9	3.857	0	1787.39	704.106	3930.14		123	675.3	12.8723	4068.52	0		123	393.8	25.5427	3537.19	0
124	331.2	3.857	530.266	257.994	2058.14	6382.55		124	537.1	6.8625	4047.47	0		124	452.1	5.7185	3532.94	0
125	330.2	3.875	6222.26	1561.33	23063.6	23936.6		125	293.3	6.35017	4037.41	0		125	605.3	16.9093	3524.3	0
126	373	3.887	5000.18	949.906	1314.21	957.12		126	364	9.56717	4035.29	0		126	451.1	7.9245	3521.95	0
127	358.2	3.9465	0	0	673.03	3126.54		127	375	37.0835	4027.99	0		127	395.1	25.412	3509.09	0
128	330.3	3.999	0	206.775	8047.95	1539.75		128	325.1	7.47717	4025.7	0		128	377.2	19.9977	3491.37	0
129	330.4	4.04375	0	0	3306.53	4457.83		129	378.5	24.5315	3985.34	0		129	667.8	7.5125	3479.54	0
130	394.2	4.1835	2427.56	705.174	0	0		130	617.3	16.7065	3963.04	0		130	443.3	23.442	3471.22	0
131	416.3	4.18367	0	259.801	0	2875.49		131	507.3	9.95717	3952.77	0		131	393.9	26.8285	3460.32	0
132	372.3	4.282	0	0	2234.26	0		132	566.1	12.063	3937.82	0		132	547.2	28.519	3428.28	0
133	416.1	4.282	7423.12	2667.46	8785.03	0		133	441.5	18.9722	3910.25	0		133	411.3	21.102	3427.68	0
134	416.2	4.30075	1041.94	3813.88	3195	9006.87		134	523.1	19.9273	3880.53	0		134	437.3	18.3825	3421.72	0
135	223.1	4.49317	880.201	4356.27	3179.73	0		135	394	15.7797	3821.87	0		135	908.3	7.56367	3389.45	0
136	599.3	4.513	0	0	2493.22	791.483		136	292.9	15.165	3784.99	0		136	434.1	7.08533	3387.76	0
137	370	4.51517	3006.7	0	742	418.764		137	640.3	15.3783	3766.13	0		137	354.2	21.1665	3387.7	0
138	300	4.57042	793.367	321.219	5441.46	5113.58		138	377.9	10.0078	3753.46	0		138	371.8	16.9222	3384.41	0
139	599.4	4.584	0	532.786	5678.2	4344.96		139	205	17.7017	3733.89	0		139	281.6	7.40917	3352.45	0
140	599.5	4.58683	0	3343.75	617.52	1483.54		140	311.3	9.27717	3717.71	0		140	371.2	5.541	3337.53	0
141	460.2	4.592	2178.79	3668.98	2283.8	6488.18		141	431	12.484	3705.14	0		141	284.8	15.0538	3331.32	0
142	482.3	4.65375	0	0	4336.46	3609.46		142	770.4	10.5202	3700.06	0		142	305.1	21.6504	3313.15	0
143	460.3	4.65517	1820.8	2784.69	4135.4	4995.43		143	399.1	19.8748	3699.2	0		143	413.3	7.581	3291.95	0
144	460	4.69	178.101	0	2815.51	0		144	435.3	22.4305	3684.38	0		144	580.2	17.3602	3278.48	0
145	359.4	4.72567	3247.03	4095.7	311.417	1542.78		145	302.3	17.7545	3678.19	0		145	187.1	36.876	3266.6	0
146	299.1	4.92	401.989	1268.06	2897.48	1369.85		146	382.1	10.486	3650.4	0		146	375.3	29.8792	3205.07	0
147	299.3	5.027	901.239	1530.71	3090.96	0		147	493.2	24.713	3639.76	0		147	206	0.560167	3198.94	0
148	359	5.027	1077.24	0	4229.11	0		148	382.3	36.9688	3630.59	0		148	548.3	28.479	3183.88	0
149	299	5.05608	0	0	5263.6	2617.82		149	463.2	8.4235	3615.67	0		149	547.6	23.3854	3176.2	0
150	321.2	5.06183	7896.98	1289.23	3768.53	500.201		150	371.2	1.4115	3545.29	0		150	562.3	13.0617	3164.1	0
151	321.3	5.075	0	676.377	0	3202.26		151	248	21.7352	3519.12	0		151	681.6	21.7678	3152.74	0
152	337.2	5.151	3709.96	2071.89	209.536	1118.88		152	372.3	15.2712	3515.42	0		152	607	12.2404	3150.6	0
153	321.1	5.15475	356.781	5765.33	9269.76	1549.74		153	354	28.7068	3491.64	0		153	350	10.734	3144.5	0
154	295	5.222	0	1288.89	4368.35	2136.28		154	152	13.103	3489.36	0		154	497.4	7.44383	3127	0
155	613.4	5.222	0	957.109	3358.04	2656.18		155	371	24.1682	3457.8	0		155	379.2	24.9848	3120.46	0
156	307.2	5.24425	869.081	366.409	10069.6	4954.45		156	413.1	26.5293	3438.76	0		156	360.1	28.865	3083.74	0
157	307.3	5.2455	499.331	1065.47	6580.36	14319.2		157	548.3	28.479	3431.22	0		157	295.4	20.262	3074.97	0
158	370.1	5.258	4668.24	0	0	4196.05		158	781.2	10.831	3387.7	0		158	440.3	21.7097	3064	0
159	307.9	5.2635	0	534.145	1229.6	5017.32		159	513.4	28.5023	3386.12	0		159	247	0.596	3052.53	0
160	394.2	5.276	5443.21	580.995	0	1088.5		160	265.2	23.3478	3378.14	0		160	976.5	10.7548	3030.54	0
161	370	5.2865	720.928	2974.36	2689.22	1788.45		161	261	3.4795	3370.8	0		161	249.3	15.2707	3023.53	0
162	359.3	5.305	747.073	3912.48	0	604.918		162	497.1	28.514	3351.19	0		162	474.4	22.888	3011.76	0
163	350.4	5.346	0	0	4173.99	1852		163	151.8	9.20833	3346.42	0		163	400.2	8.32433	3009.62	0
164	284	5.39633	5156.99	11438.1	0	4636.27		164	421	10.7793	3345.36	0		164	482.3	28.3982	2990.88	0
165	306.2	5.39733	478.989	11322.4	10958.6	3785.67		165	382.2	36.9193	3309.73	0		165	411	22.2037	2969.35	0
166	284.2	5.399	5046.47	513.261	12300.6	4192.61		166	359.4	43.1607	3302.26	0		166	929.1	7.03417	2954.74	0
167	322	5.423	0	6744.64	1058.61	6092.69		167	429.1	7.53417	3274.2	0		167	735.3	6.36433	2954.31	0
168	241.1	5.432	685.782	7039.65	6504.69	7073.79		168	283.1	24.1462	3257.76	0		168	275.1	7.1875	2908.64	0
169	372.3	5.434	502.643	0	5598.93	0		169	395	11.749	3256.09	0		169	329.5	9.65983	2887.87	0
170	322.1	5.43417	12998.7	12740.2	11469.3	5869.17		170	261.2	0.205167	3250.71	0		170	419	8.27217	2859.09	0
171	430.1	5.486	0	5374.18	0	763.925		171	727.4	22.8844	3244.41	0		171	419.4	22.7085	2812.13	0
172	242.2	5.48742	398.299	624.422	4413.84	2848.22		172	394	23.4692	3233.84	0		172	248.3	21.986	2801.56	0
173	306.1	5.48742	12357.8	6394.98	5787.25	12350.5		173	468.2	21.1895	3222.16	0		173	378.2	29.238	2799.23	0
174	431.1	5.488	240.369	817.131	9927.09	1592.19		174	413.9	9.63517	3220.56	0		174	152	0.737833	2792.7	0
175	241.2	5.5055	3154.76	3943.2	19327	22958.5		175	533.4	28.1315	3193.65	0		175	373.3	17.308	2753.11	0
176	373.2	5.5055	1106.76	3976.1	1221.3	4226.08		176	948.5	13.7343	3149.53	0		176	526.3	28.8853	2751.61	0
177	453.1	5.523	0	964.722	2805.82	0		177	244.2	0.666167	3112.16	0		177	554.4	14.739	2746.41	0
178	371.2	5.541	0	3337.53	13269.5	0		178	375.4	25.112	3112.05	0		178	497.2	11.4762	2737.92	0
179	432.3	5.576	621.686	682.554	6099.95	1533.26		179	368.1	9.08717	3034.67	0		179	613.3	13.5542	2724.48	0
180	432.2	5.57867	2066.52	926.975	0	3603.96		180	513.1	11.4708	3029.92	0		180	856	9.75017	2722.08	0
181	430.2	5.594	95370.3	77640.7	134282	75517.1		181	987	8.0965	3028.1	0		181	377.1	20.9478	2716.78	0
182	468.2	5.594	3448.97	1677.79	12967.8	9143.52		182	854.7	6.4485	3013.58	0		182	371.9	37.7665	2697.7	0
183	431.3	5.59533	2740.87	5954.06	20468.6	12499.9		183	152.1	19.5777	3000.86	0		183	196	36.9243	2687.1	0
184	452.2	5.60258	11208.8	13266.7	18855.5	26341.7		184	495.4	26.1132	2969.04	0		184	532.3	27.7763	2684.95	0
185	453.3	5.61467	1317.44	281.326	1457.34	3497.86		185	525.5	28.6393	2969.04	0		185	372.3	4.282	2667.46	0
186	431.2	5.6645	15964.4	13598.2	8786.51	25088.1		186	634.1	25.3685	2960	0		186	371.9	40.5795	2666.8	0
187	452.3	5.665	2888.34	802.158	10709.2	2189.63		187	110.9	22.3948	2957.29	0		187	495.4	13.1079	2663.23	0
188	468.3	5.665	0	3323.42	2935.93	3647.73		188	293.3	15.706	2926.66	0		188	547.1	9.865	2649.94	0
189	372.2	5.66558	4704.54	796.969	0	7702.4		189	515.4	14.6667	2925.25	0		189	437.2	11.459	2646.5	0
190	371.1	5.7005	18589.5	28208.7	6273.19	21879.3		190	152.1	18.9232	2920.86	0		190	300.9	22.7623	2632.62	0
191	468.1	5.70792	4699.15	2507.66	501.669	879.669		191	381.4	22.0726	2917.54	0		191	552.4	11.53	2627.28	0
192	452.1	5.7185	547.577	3532.94	0	0		192	400.1	8.32817	2899.47	0		192	998.2	13.315	2619.26	0
193	898.3	5.72117	0	0	3696.22	4186.4		193	369.1	17.9867	2886.38	0		193	468.1	9.37967	2600.17	0
194	897.3	5.72383	0	0	3010.4	6427.5		194	394.1	21.1033	2876.01	0		194	441.3	15.578	2583.78	0
195	432.3	5.72942	0	0	1882.13	2490.58		195	203.1	0.595167	2863.06	0		195	275	7.64967	2580.5	0
196	430.3	5.73417	7359.22	2837.16	5507.76	121900		196	205	0.507	2851.61	0		196	416.2	6.85717	2573.88	0
197	897.2	5.736	0	0	6814.85	0		197	452.2	7.45908	2812.18	0		197	111	29.0258	2573.79	0
198	898.1	5.789	0	0	3073.78	685.422		198	654.5	9.31117	2804.76	0		198	441.7	11.7818	2572.11	0
199	897.4	5.81533	0	0	242.89	5463.09		199	273.8	7.47767	2755.94	0		199	110.9	24.346	2562.91	0
200	241	5.82417	1069.29	5799.99	0	2446.76		200	538.2	25.2947	2751.17	0		200	451.1	7.495	2559.74	0
201	431.1	5.83383	0	306.925	0	4148.84		201	432.9	8.25117	2745.62	0		201	412.3	10.6118	2551.45	0
202	372.8	5.86	0	0	2488.99	0		202	377.2	19.9977	2745.4	0		202	292.8	15.2523	2546.02	0
203	305.2	5.86	1394.48	0	3323.73	0		203	581.2	22.8189	2743.49	0		203	313.1	15.0538	2537.57	0
204	241.1	5.869	3264.88	0	2635.87	4448.86		204	713.3	23.1683	2735.99	0		204	371.9	6.5025	2534.4	0
205	241.2	5.89467	1042.64	3676.06	3191.8	3603.47		205	395	24.0913	2734.08	0		205	309	9.777	2533.7	0
206	291	5.94717	0	3673.8	212.4	1153.43		206	654.4	15.3783	2708.3	0		206	481.4	28.4118	2520.68	0
207	440.1	6.02675	0	3446.34	3916.63	727.899		207	373.3	14.026	2696.64	0		207	470.8	15.0584	2517.63	0
208	357.4	6.126	0	2221.56	11997.9	0		208	481.1	21.284	2691.36	0		208	425.3	18.2332	2505.53	0
209	713.3	6.19917	6122.95	0	0	4382.72		209	521.2	11.0255	2687.88	0		209	428.3	15.4138	2494.85	0
210	713.4	6.21508	2454.72	3634.64	5026.52	7627.28		210	542.1	8.8365	2684.93	0		210	318	17.327	2488.42	0
211	357.3	6.21625	16395.6	4424.58	45266.1	17460.8		211	395.2	39.2653	2684.78	0		211	904.6	11.3868	2467.42	0
212	736.3	6.23517	6457.1	1961.42	0	845.748		212	419.3	18.1632	2675.05	0		212	281.3	7.5975	2462.93	0
213	751.4	6.23842	0	4258.12	1104.31	7357.32		213	281	22.755	2674.38	0		213	521.3	11.1162	2459.2	0
214	713.5	6.25542	0	4704.48	6778.49	1197.77		214	245.3	38.0568	2670.96	0		214	347.2	36.7965	2437.25	0
215	735.4	6.25592	8470.5	11414.5	20018.7	25202.1		215	579.5	22.9343	2652.67	0		215	882.9	11.9778	2436.39	0
216	357.2	6.27383	7832.46	30141	1335.51	57622.8		216	988.4	9.20833	2626.68	0		216	284.2	23.7507	2410.85	0
217	736.4	6.285	742.981	4403.05	8627.21	5025.07		217	444.3	8.662	2617.67	0		217	262.1	36.9602	2365.62	0
218	752.2	6.28767	0	566.58	439.071	4041.68		218	393.2	1.3965	2586.7	0		218	395.3	14.8183	2344.26	0
219	359	6.303	690.878	1778.22	4130.82	0		219	690	9.80433	2540.82	0		219	654.4	15.1262	2321.09	0
220	393.2	6.306	0	0	789.7	4406.24		220	373	16.3727	2531.55	0		220	394.2	42.4595	2321.07	0
221	735.5	6.321	0	0	5166.43	3044.48		221	625.1	13.262	2531.28	0		221	459.4	26.1538	2307.95	0
222	751.3	6.32333	1457.39	0	0	8232.62		222	226.9	37.019	2529.02	0		222	360	36.9968	2295.13	0
223	332.8	6.34217	3091.86	0	4052.38	0		223	479.8	15.0398	2524.75	0		223	477.3	8.20217	2293.63	0
224	293.3	6.35017	4149.25	0	1767.47	743.929		224	450.2	11.021	2511.29	0		224	392.9	22.821	2290.61	0
225	308.2	6.35017	4037.41	168.565	0	0		225	318.4	12.364	2506.3	0		225	395.1	19.897	2286.51	0
226	333.5	6.356	0	1101.92	4310.66	506.643		226	301	18.198	2503.53	0		226	261.2	11.8172	2283.07	0
227	735.3	6.36433	1906.66	2954.31	1292.43	0		227	888.7	12.678	2486.76	0		227	352	10.9898	2281.25	0
228	332.9	6.417	1137.9	3433.42	869.778	3481.49		228	393.9	21.9207	2480.96	0		228	282.4	21.2397	2278.04	0
229	854.7	6.4485	3013.58	0	0	0		229	281	22.4845	2447.81	0		229	334.2	7.39283	2268.29	0
230	313.1	6.45808	4391.49	5175.47	2920.5	2786.67		230	394.2	4.1835	2427.56	0		230	512.5	17.3765	2260.9	0
231	434.2	6.48225	3896.3	11555	3192.53	752.08		231	394.2	0.490833	2422.35	0		231	382.1	10.486	2253.37	0
232	329	6.48633	0	0	663.56	4244.81		232	152.4	40.4385	2422.22	0		232	357.4	6.126	2221.56	0
233	313	6.49217	270.651	424.345	5030.76	6155.42		233	433.4	8.60783	2413.68	0		233	413.2	22.946	2109.88	0
234	371.9	6.5025	0	2534.4	1564.48	0		234	373.2	7.34167	2410.39	0		234	275.3	12.276	2075.94	0
235	357.1	6.5045	0	0	0	3606.27		235	456.1	7.42667	2409.41	0		235	302.1	17.274	2059.64	0
236	333	6.5045	292.905	0	611.62	13045.6		236	831.3	10.7277	2383.94	0		236	376.1	26.4623	2027.78	0
237	359.1	6.533	10060.2	2240.82	7354.13	5519.34		237	850.3	8.32817	2380.57	0		237	471.3	22.946	2026.93	0
238	395.1	6.5375	3362.91	5064.68	706.133	695.39		238	540.5	28.5103	2370.96	0		238	302.2	14.349	1964.58	0
239	325.3	6.547	9672.5	921.241	3339.07	676.773		239	378.1	29.6948	2361.68	0		239	161	36.93	1962.99	0
240	313.2	6.594	1050.48	0	0	3052.34		240	959.8	16.7805	2336.24	0		240	406.3	12.5545	1960.74	0
241	326.3	6.657	3841.21	864.868	13481.8	3108.59		241	689.5	21.6042	2332.51	0		241	498.4	15.5595	1958.04	0
242	325.1	6.65767	0	7782.52	9777.44	0		242	261.2	38.458	2323.82	0		242	259	36.859	1922.36	0
243	326.2	6.6915	1759.81	4833.16	977.32	3110.58		243	659.3	9.19083	2323.52	0		243	530.4	22.946	1893.92	0
244	325.2	6.72383	33211.1	9549.85	42929.9	28203.7		244	350.2	9.703	2314.36	0		244	396.4	24.4945	1864.31	0
245	537.3	6.728	0	0	3885.96	0		245	396.1	25.2585	2282.02	0		245	331.1	21.5672	1862.61	0
246	161.1	6.746	859.497	0	3353.68	0		246	273.2	9.17317	2280.96	0		246	310.3	23.867	1859.9	0
247	537.2	6.77767	5758.66	12131.8	2373.33	4681.89		247	852.9	11.6793	2274.76	0		247	495.4	26.1132	1809.09	0
248	326.1	6.7915	694.195	912.643	0	6007.73		248	245	38.4845	2273.77	0		248	427.2	9.65233	1786.45	0
249	394.1	6.80383	11668	19950.9	5681.95	3838.9		249	293.3	8.11517	2266.3	0		249	359	6.303	1778.22	0
250	416.1	6.81133	2051.61	7585.85	790.128	645.823		250	376.4	26.6572	2262.72	0		250	470.3	15.0228	1756.48	0
251	395.2	6.84617	3518.41	5317.57	733.867	0		251	524.1	24.5858	2256.67	0		251	203	0.525	1739.94	0
252	416.2	6.85717	0	2573.88	2320.03	0		252	392.8	1.46817	2248.22	0		252	513.1	11.4708	1721.72	0
253	537.1	6.8625	0	4180.15	0	0		253	110.9	29.4612	2243.87	0		253	263.3	21.6863	1640.86	0
254	325.3	6.8625	4047.47	2739.42	0	2744.7		254	979.7	10.8485	2214.34	0		254	376.3	8.128	1624.4	0
255	537.4	6.87	0	0	2276.74	0		255	279.3	20.1795	2191.64	0		255	333.9	7.455	1622.4	0
256	371	6.88033	26712.8	7053.01	9741.04	19556.7		256	346.2	21.8095	2190.47	0		256	583.3	22.804	1614.4	0
257	261	6.8985	423.251	682.768	1722.56	4263.05		257	470.9	8.3475	2152.13	0		257	152.1	1.862	1603.52	0
258	930.2	6.9165	356.08	0	0	2583.49		258	483.4	21.7172	2152.02	0		258	359.4	17.1105	1581.7	0
259	944.2	6.92	0	0	4109.95	5277.89		259	372.2	2.16817	2101.81	0		259	285.1	10.468	1579.83	0
260	394.2	6.93092	5199.74	9758.6	7047.74	2382.99		260	941.7	16.3548	2097.55	0		260	437.2	18.5403	1568.27	0
261	930.3	6.938	0	0	4896.98	5091.09		261	305.1	21.6504	2090.88	0		261	909.4	9.759	1556.76	0
262	929.2	6.941	286.635	0	13677.3	8848.1		262	432.2	5.57867	2066.52	0		262	552	11.602	1552.64	0
263	945.4	6.95283	0	0	0	3807.15		263	419.4	22.7085	2058.04	0		263	390.1	13.049	1548.02	0
264	359.1	6.96433	4661.82	0	625.155	2342.83		264	392.9	24.3643	2057.09	0		264	316.1	2.86692	1542.17	0
265	928.3	6.988	845.785	3355.44	51028.4	60202.4		265	285.3	15.3245	2041.44	0		265	343.2	23.3833	1539.05	0
266	944.3	7.00017	0	579.393	7623.04	5005.47		266	539.2	24.5065	2020.97	0		266	299.3	5.027	1530.71	0
267	486.2	7.03	2529.68	9836.45	5757.38	794.738		267	652.4	13.2666	2018.63	0		267	538.2	25.2947	1519.91	0
268	929.1	7.03417	0	2954.74	0	0		268	419	8.27217	2017.87	0		268	553.2	25.303	1468.37	0
269	394	7.05067	1744.47	3709.16	0	478.249		269	939.4	18.5355	1885.48	0		269	394.9	27.731	1458.24	0
270	486.1	7.068	2604.47	12081.5	1418.64	2972.75		270	661.3	17.0558	1827.98	0		270	542.3	8.678	1420.52	0
271	434.1	7.08533	282.583	3387.76	2162.7	0		271	429.1	25.9258	1768.41	0		271	675.3	12.8723	1415.34	0
272	930.2	7.0945	0	0	0	2490.58		272	394	7.05067	1744.47	0		272	409.1	25.4427	1409.13	0
273	275.1	7.1875	403.125	2908.64	627.285	0		273	613.3	13.5542	1709.37	0		273	497.2	22.077	1392.97	0
274	428.2	7.20733	5293.03	1103.53	784.689	0		274	465.1	21.813	1701.92	0		274	297.8	10.468	1384.55	0
275	152.2	7.22217	1678.74	5375.06	0	1621.7		275	152.2	7.22217	1678.74	0		275	357.1	21.902	1358.9	0
276	373	7.26	1174.93	0	3416.38	324.678		276	419.4	22.888	1675.81	0		276	325.1	7.47717	1322.22	0
277	432	7.26033	4455.5	0	1261.4	0		277	631.3	23.3907	1671.07	0		277	371.9	38.8177	1310.98	0
278	383.2	7.28967	5977.93	9798	4451.2	11242.3		278	374.1	9.73733	1649.41	0		278	380.2	24.541	1292.48	0
279	432.2	7.28967	1275.31	5797.03	2739.93	5310.7		279	285.1	23.3735	1550.81	0		279	319.3	21.918	1250.32	0
280	383.3	7.32783	6208.14	0	3288.48	5428.26		280	362.9	17.1103	1533.6	0		280	419.2	8.40433	1243.49	0
281	373.2	7.34167	2410.39	8528.4	0	4651.85		281	312.2	15.0722	1489.87	0		281	428.2	15.041	1192.96	0
282	223.1	7.358	751.264	3110.87	397.509	1217.26		282	751.3	6.32333	1457.39	0		282	413.1	21.957	1190.17	0
283	454.2	7.36733	48254.4	71655.4	31228	770.867		283	511.4	16.0432	1454.01	0		283	442.2	18.142	1180.35	0
284	334.2	7.39283	184.737	2268.29	939.75	0		284	289.1	9.4085	1427.93	0		284	361.1	26.987	1175.04	0
285	455.2	7.39283	29191.2	30806.5	20803.5	3365.99		285	353.1	8.41883	1422	0		285	152.2	38.844	1167.45	0
286	279.7	7.402	423.304	0	6757.65	0		286	595.9	12.0812	1395.98	0		286	441.1	15.218	1124.74	0
287	421.1	7.40433	5072.76	0	0	0		287	612.1	14.584	1375.07	0		287	428.2	7.20733	1103.53	0
288	281.6	7.40917	0	3352.45	1067.73	0		288	438.2	13.6925	1355.11	0		288	261	3.4795	1084.38	0
289	392.9	7.41317	0	0	640.065	3248.86		289	295.2	15.4322	1350.67	0		289	479.4	21.8833	1049.34	0
290	347.8	7.419	0	0	3510.97	0		290	322.2	0.615	1333.3	0		290	316.9	7.969	1020.91	0
291	667.1	7.419	0	0	4299.62	292.828		291	285.4	23.104	1330.19	0		291	289.8	10.521	1020.47	0
292	451.2	7.42183	3747.74	16385.3	5878.66	841.075		292	482.2	22.1653	1328.25	0		292	385.3	12.559	994.756	0
293	885.2	7.42183	35573.8	172668	1999.23	0		293	416.2	13.6935	1308.99	0		293	395.1	21.333	994.149	0
294	456.2	7.42292	3208.6	21390.5	9172.8	0		294	372.9	18.4625	1281.39	0		294	543.4	23.477	977.98	0
295	887.3	7.4265	2355.83	48111.3	9869.68	6142.07		295	513.6	26.7822	1276.01	0		295	279.3	15.6327	977.867	0
296	456.1	7.42667	2409.41	0	0	2373.89		296	205.1	0.596	1190.47	0		296	453.1	5.523	964.722	0
297	317	7.437	835.5	6224.45	9062.09	0		297	377.4	26.0476	1171.74	0		297	437	14.756	926.47	0
298	261.2	7.4405	4108.8	780.354	465.405	823.268		298	292.8	15.2523	1146.09	0		298	377	8.235	915.135	0
299	883.9	7.44383	0	3763	0	0		299	674.2	0.561833	1142.98	0		299	385.4	12.4684	913.884	0
300	316.1	7.44383	18601.3	83548.8	21712	8080.59		300	377.1	20.9478	1140.77	0		300	308.1	9.086	903.02	0
301	348	7.44383	246.016	3394.15	340.114	211.377		301	365.6	9.64717	1104.3	0		301	411.2	22.8452	872.355	0
302	659.8	7.44383	0	3617.17	249.1	427.275		302	241	5.82417	1069.29	0		302	381.3	10.557	872.086	0
303	908.2	7.44383	975.279	4039.54	226.389	0		303	593.3	15.9787	1068.29	0		303	374.4	19.702	856.015	0
304	497.4	7.44383	319.17	3127	0	0		304	223	2.90033	1060.27	0		304	551.3	14.9697	851.663	0
305	658.8	7.44383	0	7145.59	253.34	0		305	317.1	2.83183	1054.58	0		305	152.3	37.663	850.723	0
306	666.7	7.44383	0	15166.4	160.06	0		306	313.2	6.594	1050.48	0		306	371	15.076	843.169	0
307	882.3	7.44383	170.497	14111.2	0	0		307	963.1	21.7782	1039.12	0		307	497.2	8.4235	813.075	0
308	888.3	7.4465	306.053	8700.48	2174.3	2821.72		308	223	11.3343	1033.12	0		308	770.6	15.058	787.709	0
309	333.9	7.455	1467.43	1622.4	4278.16	0		309	546.5	28.816	994.785	0		309	562.4	13.02	775.403	0
310	471.1	7.455	0	5183.35	5907.55	1226.82		310	521.4	26.9158	984.941	0		310	439.1	20.535	771.617	0
311	452.2	7.45908	2812.18	5929.67	0	197.326		311	620.2	13.3658	979.668	0		311	713.3	23.1683	758.609	0
312	362.1	7.46133	0	10807.6	2903.73	1246.48		312	617.2	16.559	967.666	0		312	205	0.507	753.433	0
313	471.2	7.46133	2298.94	12667.1	658.427	263.534		313	638.2	22.846	954.384	0		313	447.2	9.4655	728.196	0
314	472.1	7.46133	677.542	9079.93	382.335	2959.68		314	409.2	22.1663	902.84	0		314	616.3	16.6	726	0
315	885.3	7.46133	0	403537	107200	64245.1		315	471.2	10.343	872.556	0		315	377.1	27.447	708.309	0
316	886.3	7.46133	8149.73	202312	36849	6309.06		316	376.1	8.14567	872.043	0		316	394.2	4.1835	705.174	0
317	943.2	7.46133	1190.89	3742.93	813.66	704.061		317	329	0.598	847.198	0		317	592.4	16.157	703.654	0
318	874.2	7.46133	0	7361.07	763.605	0		318	524.5	28.7442	842.352	0		318	654.5	9.31117	682.183	0
319	323.5	7.46592	485.33	4525.12	3802.66	538.343		319	372.2	14.4592	801.587	0		319	378.4	28.0425	680.773	0
320	324.1	7.47383	3865.83	4427.62	3266.71	0		320	220	0.596	777.092	0		320	781.2	10.831	653.072	0
321	325.1	7.47717	4025.7	0	0	0		321	359.3	5.305	747.073	0		321	580.6	21.014	623.651	0
322	279.5	7.47717	2637.55	1322.22	3029.92	0		322	436.3	22.3118	745.864	0		322	394	15.7797	622.179	0
323	470.1	7.47717	7511.4	0	24005.7	11584.7		323	279.1	20.4065	740.621	0		323	511.4	26.6708	603.039	0
324	273.8	7.47767	0	5158.02	0	0		324	400.2	8.32433	734.417	0		324	273.2	9.17317	576.493	0
325	874.8	7.47767	0	5547.19	0	0		325	428.4	11.1292	731.257	0		325	534.2	21.74	537.284	0
326	281.7	7.47767	2755.94	3530.67	0	295.388		326	562.3	13.0617	716.083	0		326	261.2	0.205167	506.032	0
327	888.2	7.47767	250.221	16335	954.082	0		327	976.5	10.7548	715.883	0		327	399.1	10.5377	496.019	0
328	455.1	7.48075	2852.43	42196.5	15991.2	38039.7		328	371.8	16.9222	706.744	0		328	375	37.0835	474.496	0
329	317.1	7.48383	1235.78	7648.52	3624.53	3666.02		329	326.1	6.7915	694.195	0		329	297.8	10.7453	472.481	0
330	334	7.48383	0	668.139	679.467	3588.5		330	366.1	0.633	693.642	0		330	671.6	21.829	469.236	0
331	454.1	7.49008	74301.3	191398	105653	98280.3		331	432.1	8.23667	684.742	0		331	161.2	37.1328	461.259	0
332	659.9	7.495	0	2559.74	0	0		332	579.2	17.9688	680.636	0		332	356.3	22.999	458.774	0
333	883.3	7.495	0	12832.8	0	0		333	378.4	19.8673	675.809	0		333	652.4	11.159	431.158	0
334	451.1	7.495	434.903	20385.6	464.28	0		334	445	19.7777	664.752	0		334	400.3	8.44267	423.989	0
335	316	7.50167	3260.68	61960.5	16576	26232		335	409.3	23.0532	664.256	0		335	493.2	24.713	401.56	0
336	887.2	7.51025	475.984	49911.9	4573.9	182.349		336	313.2	14.9447	569.384	0		336	113	0.648167	400.837	0
337	667.8	7.5125	0	3479.54	0	0		337	457.5	16.2268	565.05	0		337	549.3	14.738	389.936	0
338	886.2	7.51508	6587.25	87227.6	1624.05	22368.1		338	452.1	5.7185	547.577	0		338	151.7	37.656	387.177	0
339	451.3	7.5195	0	1854.82	1300.21	6412.37		339	393.9	20.5792	544.289	0		339	337.3	15.023	384.757	0
340	456.3	7.526	1188.9	0	2648.94	0		340	374.2	20.0465	537.496	0		340	547.5	28.7183	362.509	0
341	470.2	7.528	9340.8	48445.4	11929.7	13009.4		341	395.2	8.31683	517.059	0		341	110.9	29.4612	358.443	0
342	429.1	7.53417	3274.2	225.337	0	0		342	152.1	43.113	507.766	0		342	811	10.4343	355.304	0
343	471	7.53633	0	0	0	5682.66		343	532.4	14.4263	498.396	0		343	425.1	8.607	337.519	0
344	315.8	7.544	0	0	10247.5	0		344	360.2	22.568	469.161	0		344	269.2	0.862	333.603	0
345	279.6	7.54892	0	1752.46	3103	6474.48		345	553.1	25.2125	467.332	0		345	187	37.1328	325.507	0
346	908.3	7.56367	0	3389.45	0	0		346	359.2	15.236	467.073	0		346	377.2	37.0835	313.641	0
347	413.3	7.581	0	3291.95	0	0		347	397.2	22.846	452.476	0		347	305.3	21.634	312.977	0
348	412.2	7.59083	5100.14	2764.75	572.277	1234.34		348	333.1	14.7827	452.028	0		348	373.3	9.67	305.679	0
349	281.3	7.5975	0	2462.93	466.594	0		349	279.9	0.651	449.376	0		349	382.1	21.776	282.752	0
350	279.3	7.60667	176.482	0	0	2573.88		350	472.1	7.9245	425.95	0		350	437.3	17.3357	246.971	0
351	486.1	7.614	0	3812.16	2804.47	2639.54		351	281.4	7.64967	394.742	0		351	429.1	7.53417	225.337	0
352	323.4	7.61483	653	4726.54	494.16	1339.83		352	187.1	8.786	381.893	0		352	628.4	26.455	221.431	0
353	404.1	7.61483	1426.15	10530.8	424.935	162.044		353	372.8	15.5045	379.685	0		353	473.2	25.923	211.987	0
354	574.2	7.61583	1445.11	5448.4	5755.45	1740.1		354	206	0.560167	374.242	0		354	375.1	36.841	203.46	0
355	574.3	7.62792	723.137	1885.33	5992.18	9294.26		355	260.9	18.3663	358.174	0		355	320.1	36.894	201.141	0
356	883.4	7.63233	0	4805.28	0	0		356	930.2	6.9165	356.08	0		356	475.3	22.8452	191.399	0
357	281.4	7.64967	0	2580.5	0	0		357	395.2	29.7703	342.709	0		357	629.2	13.4572	187.429	0
358	275	7.64967	394.742	4000.44	0	0		358	883.9	7.44383	319.17	0		358	390	10.255	184.094	0
359	316.9	7.66617	0	4467.25	0	0		359	563.5	21.6543	294.574	0		359	513.4	28.5023	182.587	0
360	917.3	7.66617	0	8349.81	436.65	0		360	391.2	23.7467	280.818	0		360	380.4	28.514	182.177	0
361	404	7.66733	3216.3	0	368.49	760.581		361	453.4	20.691	280.455	0		361	675.4	12.961	173.091	0
362	612.2	7.67683	0	0	977.22	5395.83		362	380.2	24.8312	253.263	0		362	695.3	21.935	170.374	0
363	223.1	7.78217	1240.97	1486.08	1719.32	3105.67		363	612.6	21.2638	244.999	0		363	293.3	6.35017	168.565	0
364	315.8	7.8165	0	0	0	4264.18		364	718.4	14.9792	228.104	0		364	346.2	21.8095	165.87	0
365	377.2	7.84133	6576.82	1208.25	1514.41	826.19		365	540.5	19.6875	227.465	0		365	382.2	36.9193	165.036	0
366	223	7.845	244.769	880.604	3498.53	939.277		366	223.2	10.811	221.509	0		366	497.1	28.514	126.562	0
367	361.2	7.863	315.034	781.005	5487.38	2663.29		367	354.2	27.2872	209.574	0		367	887.2	7.51025	49911.9	182.349
368	472.1	7.9245	0	3521.95	0	0		368	427.3	25.7212	207.941	0		368	546.4	28.5467	33777.1	298.676
369	451.1	7.9245	425.95	7758.88	0	0		369	269.2	0.560167	204.79	0		369	454.2	7.36733	71655.4	770.867
370	316	7.95833	10286.4	15748.7	3807.82	5156.24		370	377.4	19.4187	194.295	0		370	527.4	28.4961	44251.4	511.397
371	317.1	7.9595	0	4739.03	0	1409.93		371	425.3	17.9508	189.651	0		371	323.4	7.61483	10530.8	162.044
372	316.9	7.969	1088.13	1020.91	4583.21	0		372	279.3	7.60667	176.482	0		372	431.2	12.5375	9696.64	188.416
373	279.4	7.97617	3463.86	16350.5	2782.86	3686.82		373	316.1	7.44383	170.497	0		373	325.2	10.1783	21557.1	437.267
374	261.1	8.004	1972.58	475.614	4872.46	1395.37		374	547	17.1832	167.629	0		374	471.2	7.46133	12667.1	263.534
375	291.3	8.004	0	216.734	2653.98	486.803		375	437.2	11.459	159.273	0		375	495.1	13.906	7755.86	180.845
376	470.2	8.03742	7827.75	12981.5	1877.86	8617.6		376	449.3	28.4118	153.595	0		376	277.1	10.7548	66231.6	1840.83
377	152.2	8.0765	4657.25	1359.32	610.177	488.475		377	325.2	10.1783	14287.8	194.793		377	472.1	7.46133	202312	6309.06
378	377.2	8.093	441.321	1910.24	4131.14	1008.21		378	263.1	36.9857	41134.6	622.227		378	379.2	28.358	9865.98	315.771
379	987	8.0965	3028.1	0	0	0		379	582.4	22.9327	18311.3	418.355		379	452.2	7.45908	5929.67	197.326
380	293.3	8.11517	2266.3	0	0	0		380	367.3	8.8235	9087.43	215.586		380	654.4	15.3783	6153.14	207.397
381	376.3	8.128	709.768	820.986	4968.36	205.376		381	377.2	37.0835	6971.07	178.08		381	152.2	37.0493	15804.7	565.507
382	323.5	8.128	0	1624.4	4835.29	0		382	861.3	9.77083	7613.73	208.152		382	432.1	8.23667	5272.45	199.147
383	394.9	8.128	0	0	2782	422.131		383	279.1	16.447	6118.88	168.018		383	612.3	14.1967	6363.37	240.542
384	376.1	8.14567	872.043	0	0	4549.03		384	606.2	12.1153	14680.4	428.745		384	880.6	24.6314	4277.04	167.338
385	372.2	8.17967	0	2899.17	0	5503.25		385	941.3	15.1078	13899.8	476.055		385	394	8.943	5220.63	228.268
386	455.1	8.182	14933.5	21936.4	35458.8	22058.7		386	457.2	8.25117	5242.33	195.27		386	569.2	13.1795	7153.61	319.756
387	323.2	8.199	0	0	2380.57	0		387	369.3	21.0963	12083.8	456.456		387	879.6	24.6137	8062.05	366.081
388	152.1	8.199	504.29	4999.74	4713.77	1353.98		388	447.2	9.4655	5366.54	206.194		388	885.2	7.42183	16385.3	841.075
389	348.1	8.20092	2197.09	16381.5	7615.54	3114.76		389	462.2	8.45333	14790.7	573.867		389	405.3	11.224	3321.73	173.311
390	477.3	8.20217	0	4724.13	162.945	353.406		390	467.1	9.55883	9005.7	362.052		390	620.3	13.4515	3631.25	189.868
391	362.3	8.20217	0	2293.63	334.41	0		391	712.5	23.1137	6039.26	262.526		391	512.4	16.8918	8983.26	474.431
392	376.2	8.20775	11691.8	2377.58	1892.51	5234.57		392	811	10.4343	3773.6	188.126		392	548.3	10.2827	11693.6	618.889
393	394.2	8.224	3021.68	5552.3	12718.1	10975.7		393	471.2	15.058	5261.68	273.448		393	620.2	13.3658	4102.2	219.475
394	454.1	8.231	51342.1	80877.7	57816.7	65379.3		394	477.3	12.7307	5367.6	288.32		394	416.2	13.6935	5877.33	331.154
395	348	8.2325	4784	3048.09	2718.93	1843.89		395	956.3	15.058	6135.69	331.2		395	496.2	21.8232	3419.56	192.959
396	377	8.235	0	915.135	4229.12	0		396	770.4	8.5895	6334.4	350.86		396	394	18.1997	8400.72	483.407
397	432.1	8.23667	3524.18	6754.23	505.92	769.928		397	451.2	7.42183	35573.8	1999.23		397	638.3	17.5455	3584.21	209.122
398	849.3	8.23667	684.742	5272.45	0	199.147		398	337.2	5.151	3709.96	209.536		398	539.2	25.037	12962.8	765.936
399	473.2	8.24833	0	0	979.164	3231.33		399	419.2	8.40433	2709.52	159.75		399	360.2	36.7778	7673.86	459.412
400	432.9	8.25117	2745.62	0	0	0		400	455.2	8.29033	2762.36	164.3		400	295	15.5588	3968.71	246.071
401	457.2	8.25117	8325.33	4420.27	4837.84	7685.52		401	465.3	17.2913	5909.49	362.434		401	658.8	7.44383	3394.15	211.377
402	458.1	8.25117	5242.33	1952.19	195.27	1337.09		402	470.2	10.4685	4703.6	291.87		402	556.3	11.3245	2712.54	171.402
403	393.2	8.253	2106.23	0	7046.37	1619.75		403	584.2	12.1522	339823	21177.9		403	434.2	6.48225	11555	752.08
404	457.1	8.26567	2899.99	3767.82	6275.36	6960.65		404	879.6	24.6137	16242.4	1014.42		404	363.1	36.8328	3196.01	209.298
405	359.3	8.27067	7702.69	1017.9	0	534.216		405	783.3	10.5035	20118.8	1276.24		405	668.3	9.10417	2777.25	186.645
406	377.3	8.27067	3407.96	0	508.698	0		406	411.2	24.8582	2727.38	177.855		406	373.1	39.6435	4964.61	337.048
407	419	8.27217	2017.87	2859.09	0	0		407	910.1	9.80433	3546.76	232.824		407	468.2	24.6083	14779.4	1012.88
408	394.1	8.27467	11759.7	4474.49	7736.81	8553.02		408	395.2	15.1802	2922.86	194.133		408	444.1	9.839	87462.9	6028.8
409	275.2	8.28883	0	4607.53	1459.62	0		409	396.3	24.576	13976	958.697		409	521.2	11.0255	3492.55	257.667
410	455.2	8.29033	7801.74	8203.44	2368.61	2491.86		410	528.4	28.6278	5677.45	391.62		410	362.3	8.20217	4724.13	353.406
411	849.2	8.29033	2762.36	0	164.3	908.407		411	622.4	17.524	24346.6	1684.5		411	481.2	28.3305	4968.22	375.402
412	418.1	8.30283	13013.6	13364.4	3062.34	3684.38		412	365.4	23.8175	3649.07	253.47		412	436.3	22.3118	4396.68	335.395
413	396.1	8.306	6131.65	6417.54	6316.54	2485.32		413	152.2	37.0493	8847.82	622.834		413	634.8	12.1349	2235.32	173.731
414	418.2	8.306	6451.12	2511.3	5434.62	698.405		414	609.3	14.1338	4303	304.38		414	297.7	10.5297	5007.93	397.339
415	395.2	8.31683	517.059	1689.94	0	5953.03		415	346.1	17.0932	4241.78	312.228		415	124.1	0.649	8920.87	711.577
416	400.2	8.32433	734.417	3009.62	0	0		416	495.3	22.0587	4163.35	309.23		416	486.2	7.03	9836.45	794.738
417	400.1	8.32817	2380.57	0	0	0		417	470.3	15.0228	7997.92	621.27		417	152.2	42.6905	5507.68	445.838
418	850.3	8.32817	2899.47	0	0	0		418	411.2	22.8452	4304.57	334.96		418	175.1	36.9428	2244.94	185.935
419	470.9	8.3475	2152.13	0	0	0		419	312.3	15.0022	15198.6	1184.41		419	592.2	15.9602	5993.6	497.768
420	519.3	8.3515	0	1771.01	1394.96	2443.58		420	280	0.595167	8950.89	699.705		420	111.1	26.7198	6398.16	532.393
421	399.2	8.35258	13764.8	10634.9	10290	8897.18		421	373	11.9585	4323.74	341.964		421	888.2	7.47767	3530.67	295.388
422	455	8.36683	4823.09	0	0	0		422	483.1	9.65233	2865.18	227.85		422	416.1	6.81133	7585.85	645.823
423	396.3	8.368	0	0	0	6602.45		423	549.3	14.738	3717.11	307.166		423	498.2	23.2833	2528.1	215.884
424	519.2	8.38517	4867.64	0	690.996	2259.77		424	295	15.5588	2392.72	197.95		424	392.9	24.3643	3310.8	284.656
425	419.2	8.40433	2709.52	1243.49	159.75	0		425	415.1	13.6708	4980.94	423.87		425	321.1	16.7252	5510.88	475.15
426	432.2	8.41717	5512	1639.68	1547.52	5410.13		426	523.2	19.9774	4253.48	365.891		426	391.3	25.9438	5179.91	461.887
427	353.1	8.41883	1422	0	0	3425.08		427	381	0.543167	4705.22	414.933		427	189	37.0688	3871.64	346.468
428	497.2	8.4235	3615.67	435.211	0	578.752		428	395	2.91783	4211.19	379.14		428	431.2	11.9598	4995.6	449.352
429	463.2	8.4235	4142.86	813.075	0	0		429	378.3	30.1247	126905	11469.3		429	349.1	36.9978	3996.19	362.153
430	400.3	8.44267	4783.25	423.989	469.58	0		430	373.1	39.6435	8238.01	765.498		430	653.3	13.2643	5422.42	495.017
431	484.2	8.44267	5348.76	868.297	0	769.503		431	593.4	16.1328	5311.16	494.16		431	371	25.2432	13969.7	1344.5
432	462.2	8.45333	14790.7	6009.39	573.867	3110.6		432	371	25.2432	9698.14	903.12		432	111	12.364	3249.15	314.126
433	353.3	8.50417	1742.94	897.247	2892.97	4891.33		433	676.5	21.7728	2834.44	264		433	666.7	7.44383	83548.8	8080.59
434	399.3	8.51708	14345.5	7399.36	9954.68	6488.66		434	279.3	15.6327	3292.5	307.09		434	395	36.9243	2604.85	254.268
435	369.2	8.536	13926.6	32023.1	33151	37130.1		435	551.1	13.0283	7268.26	682.057		435	467.2	24.7793	5118.88	502.251
436	769.5	8.536	2554.96	2029.42	4225.16	2754.01		436	359.4	4.72567	3247.03	311.417		436	196.1	37.1163	2041.7	211.539
437	367.2	8.54475	1.74993e+06	1.29938e+06	1.84579e+06	1.66786e+06		437	955.4	15.111	7007.83	680.031		437	591.2	16.076	1784.89	185.553
438	369.3	8.5525	36200.6	25297.5	9979.73	18746.7		438	428.1	9.39717	7482.61	726.882		438	393.1	36.8698	24122.6	2522.13
439	368.2	8.55375	365772	303079	491304	434127		439	484.2	8.44267	4783.25	469.58		439	482.1	15.7962	10701.4	1143.12
440	769.4	8.55408	3869.51	7510.38	2959.04	5915.08		440	512.4	16.8918	8305.58	823.834		440	557.4	9.499	1473.28	159.673
441	405.2	8.55483	243.36	1314.17	2071.92	3445.78		441	245	37.1	4602.01	456.885		441	479.3	22.0867	13609.6	1483.61
442	368.3	8.5705	55557.9	100392	30233.9	105565		442	375.3	11.1428	5395.54	537.138		442	455.2	7.39283	30806.5	3365.99
443	370.1	8.572	1200.62	0	2059.1	3059.97		443	363.3	12.5456	6518	663.223		443	395.2	15.1802	4267.12	477.588
444	394	8.572	0	3124.64	4990.58	3245.19		444	373	13.3682	14341.8	1476.31		444	849.3	8.23667	6754.23	769.928
445	471.2	8.572	2998.26	287.933	4907.49	3153.18		445	301.1	25.3133	6436.32	663.495		445	395	24.0913	3318.01	379.75
446	770.4	8.5895	4708.46	192.883	2537.04	3018.81		446	371	39.0977	16865.7	1743.09		446	331.7	9.62433	3811.41	436.951
447	462.1	8.5895	6334.4	0	350.86	0		447	468.1	5.70792	4699.15	501.669		447	885.3	7.46133	10807.6	1246.48
448	403.1	8.59708	25426.2	21830.4	19239.8	13772.6		448	428.3	11.0153	12571	1346.2		448	997.3	13.227	88442	10300.3
449	425.1	8.607	0	337.519	3479.79	0		449	434.1	9.98917	14848.3	1603.96		449	321.2	16.6623	6040.39	713.245
450	433.4	8.60783	2413.68	0	0	436.91		450	430.2	24.5473	3167.41	343.44		450	882.3	7.44383	3617.17	427.275
451	404.1	8.63067	753.055	7952.81	1494.92	9696.11		451	412.2	7.59083	5100.14	572.277		451	323.5	7.46592	4525.12	538.343
452	404.2	8.65267	9864.03	2490.02	13619.4	799.904		452	551.1	9.65233	3474.86	390.218		452	467.2	25.2432	3777.07	452.831
453	444.3	8.662	2617.67	0	0	423.575		453	261.2	7.4405	4108.8	465.405		453	455.4	19.7728	4389.44	541.873
454	455.3	8.67183	4655.94	3096.46	1247.65	7270.1		454	233.2	9.4655	3167.2	359.916		454	463.3	23.1222	4636.19	576.334
455	543.3	8.67292	2824.11	3832.17	4733.97	4090.54		455	317.3	20.3093	9651.81	1098.27		455	498.2	11.5227	1961.77	244.439
456	542.2	8.67517	15930.1	17862.2	8010.82	11783.2		456	404	7.66733	3216.3	368.49		456	426.1	11.4036	3661.78	458.287
457	542.3	8.678	9835.4	3525.07	14456	5172.44		457	497.3	11.5567	20816.8	2460.41		457	567.3	12.1892	4888.38	614.26
458	403	8.678	0	1420.52	12093.2	0		458	436.1	10.6762	4956.04	591.48		458	439.2	19.8106	34630	4392.65
459	403.2	8.6885	4430.16	6058.44	1573.04	24023.8		459	359.3	14.5603	6058.96	728.057		459	887.3	7.4265	48111.3	6142.07
460	152.2	8.6985	3766.72	1013.68	3186.74	2127.31		460	375.3	24.4037	3989.7	483.955		460	540.5	28.5103	4351.34	555.642
461	152.3	8.70517	2999.09	1596.61	2500.19	869.808		461	372	29.3872	2787.8	340.26		461	394	7.05067	3709.16	478.249
462	394.2	8.73033	12881	16317.9	5923.39	3576.51		462	437.2	18.5403	5449.01	668.568		462	512.3	16.887	11225.1	1447.54
463	309.3	8.731	1860.71	0	9420.58	0		463	468.1	9.37967	8969.72	1105.09		463	293.7	15.0895	2675	349.194
464	416.2	8.76533	771.801	6533.38	414	1757.99		464	638.1	19.1107	2287.66	282.225		464	584.2	12.1522	887536	116237
465	187.1	8.786	431.799	728.409	177.723	3869.51		465	419.9	10.5035	3012.52	374.88		465	437	11.3502	2957.4	388.538
466	404	8.786	381.893	0	0	4268.52		466	397.2	9.73733	1691.61	214.524		466	269	0.578	2900.54	382.303
467	416.1	8.8055	9292.98	599.488	3107.52	3050.1		467	399.1	10.5377	5462.02	695.36		467	439.2	13.7555	4437.29	584.913
468	367.3	8.8235	176721	0	26188.4	408021		468	110.9	10.7793	2797.34	357.984		468	377.4	28.7417	20426.6	2711.38
469	543.2	8.8235	9087.43	564.487	215.586	673.764		469	360.3	29.819	16828.8	2166.75		469	421.2	10.7732	6646.98	883.642
470	309.2	8.82992	169312	94880.2	201898	176671		470	508.3	9.61783	3582.66	462.16		470	638.2	17.9708	9662.43	1286
471	542.1	8.8365	2684.93	4695.7	0	0		471	428.1	14.9517	4857.98	627.984		471	600.2	13.4167	4967.82	663.445
472	310.3	8.85067	8146.98	0	0	20302.7		472	297.8	10.7453	4166.23	541.867		472	484.1	9.60067	4783.92	648.54
473	406.2	8.873	0	251.911	4124.78	1080.63		473	484.2	9.71933	3662.61	479.532		473	395.1	6.5375	5064.68	695.39
474	394	8.943	0	5220.63	988.457	228.268		474	152.2	8.0765	4657.25	610.177		474	246.1	36.9009	4005	550.573
475	277.1	8.96117	0	4229.11	0	740.668		475	359.1	6.96433	4661.82	625.155		475	535.2	13.7058	2346.79	324.266
476	277.4	8.979	579.935	0	2633.69	0		476	237.1	9.139	5382.4	733.371		476	371.2	17.1345	12727.4	1764.35
477	406.1	9.01183	0	933.022	288.32	4049.13		477	379.4	24.4945	6117.36	838.594		477	542.2	9.3185	8441.84	1171.79
478	277.2	9.0695	5062.39	0	1118.15	601.085		478	367.1	13.103	4841.31	664.214		478	430.1	5.486	5374.18	763.925
479	295.2	9.07283	3647.73	0	788.004	6690.43		479	546.3	24.7313	8571.85	1179.57		479	513.4	15.6108	9991.56	1425.75
480	308.1	9.086	0	3278.88	822.18	570.545		480	497.2	21.1333	9243.16	1273.31		480	365.1	0.578	2391.36	343.858
481	310.1	9.086	0	903.02	6070.51	0		481	542.2	9.3185	7005.52	977.067		481	359.3	36.7965	20167.7	2907.88
482	368.1	9.08717	3034.67	0	0	673.575		482	404.1	10.0103	2961.48	413.22		482	420.2	26.8903	4550.09	660.707
483	668.3	9.10417	1109.54	2777.25	717.62	186.645		483	519.2	8.38517	4867.64	690.996		483	333.1	14.7827	2597.62	382.369
484	295.3	9.121	504.521	0	4106.7	600.309		484	513.4	26.4504	3908.32	559.61		484	397.3	23.967	4010.79	592.061
485	237	9.125	360.51	4775.81	1166	3749.87		485	849.3	8.23667	3524.18	505.92		485	394.2	26.5628	4444.87	658.841
486	237.1	9.139	5382.4	2677.34	733.371	923.028		486	509.2	15.89	18627	2694.56		486	305.1	23.6603	4906.44	729.172
487	308.2	9.15025	7393.23	2623.43	2716.78	4820.06		487	616.2	15.3063	7412.58	1080.97		487	476.1	10.2347	2494.85	377.764
488	260.9	9.16017	0	0	0	2570.3		488	377.2	29.992	24885.8	3633.57		488	285.3	15.3245	5122.47	784.052
489	373.2	9.16017	0	0	0	3526.56		489	390.2	11.2346	4190.65	614.331		489	360.3	29.819	7767.53	1200.78
490	273.2	9.17317	6118.46	576.493	1003.23	0		490	352.1	10.9177	3557.1	521.863		490	359.3	5.305	3912.48	604.918
491	405.9	9.17317	2280.96	0	0	212.716		491	355.1	29.4115	5055.16	743.979		491	560.2	22.9247	3216	501.299
492	307.2	9.18458	51393.8	37064.7	51524.8	46461.3		492	543.2	8.8235	176721	26188.4		492	373.2	24.0392	2854.2	448.25
493	659.3	9.19083	2323.52	0	0	0		493	428.2	7.20733	5293.03	784.689		493	232.1	37.2285	1071.23	169.026
494	396.2	9.192	9449.83	1202.25	4189.87	3841.35		494	461.3	15.0333	4172.13	618.765		494	382.2	30.0142	2597.38	412.121
495	418.2	9.192	6200.06	4509.14	5913.57	3971.39		495	317.1	20.4542	4221.98	629.052		495	886.3	7.46133	403537	64245.1
496	310.2	9.19317	102311	97121.5	60956.5	47416		496	584.3	12.0808	2243.87	334.41		496	532.4	27.9312	4139.83	660.214
497	371	9.19333	28571.9	21237.2	15158.7	28591.9		497	377.3	8.27067	3407.96	508.698		497	478.2	15.0314	7399.02	1185.83
498	151.8	9.20833	3346.42	0	0	0		498	451.2	24.5473	1692.79	255.46		498	405.1	10.7548	2843.98	463.228
499	988.4	9.20833	2626.68	0	0	0		499	652.3	11.2263	8512.54	1285.31		499	389.1	13.162	10416.1	1709.02
500	325.3	9.21	351.172	0	4701.47	0		500	513.2	15.505	4907.02	742.26		500	718.3	15.1733	2841.91	466.4
501	307.1	9.2295	0	9016.53	2840.45	0		501	350.3	10.8485	9655.8	1474.2		501	446.1	9.67417	8454.54	1389.92
502	309.2	9.245	372738	253086	662681	669862		502	441.3	15.578	4600.99	711.42		502	570.2	12.657	8406.86	1403.19
503	310.3	9.25292	0	3910.22	35353.7	37697.4		503	467.3	24.613	45681.6	7079.05		503	689.5	21.6042	2097.32	350.195
504	446.1	9.2615	10334.5	2748.95	1925.9	7494.41		504	880.6	24.6314	10710.7	1683.57		504	359.3	14.5603	1965.53	328.88
505	311.3	9.27717	3717.71	489.957	0	2646.93		505	469.2	24.6773	8725.01	1381.66		505	310.1	9.086	3278.88	570.545
506	587.4	9.28	0	0	3428.04	678.384		506	653.3	9.31117	5379.12	851.857		506	997.4	13.4678	4815.61	839.842
507	321.3	9.29633	0	0	0	2716.78		507	759.5	21.6042	5475.96	871.416		507	483.2	15.041	4343.37	758.452
508	275.3	9.29633	0	1824.15	0	2630.55		508	376.2	8.20775	11691.8	1892.51		508	277.1	8.96117	4229.11	740.668
509	305.2	9.298	8680.75	10876.2	23464.7	11538.6		509	482.3	15.4323	2856.9	464.34		509	503.1	15.218	6039.17	1058.18
510	653.4	9.298	2140.75	1837.96	5926.49	4831.9		510	152.1	37.1645	19928.5	3255.79		510	259.2	37.0507	7249.45	1273.71
511	311.2	9.3045	7798.49	3037.75	9926.61	3441.86		511	196.1	37.1163	4966.09	812.023		511	526.2	10.102	2750.1	483.255
512	654.5	9.31117	5379.12	1052.15	851.857	1220.12		512	405.9	9.17317	6118.46	1003.23		512	909.3	9.63833	17293.7	3072.62
513	653.3	9.31117	2804.76	682.183	0	0		513	302.2	17.2728	20199	3326.28		513	373.1	23.211	3710.72	662.433
514	542.2	9.3185	7005.52	8441.84	977.067	1171.79		514	718.8	15.3245	97485.8	16202.7		514	280.1	0.667	5170.13	924.499
515	311.1	9.348	0	610.328	1461.43	5048.68		515	282.2	21.6983	23245.9	3868.08		515	355.1	29.4115	1061.73	190.37
516	587.3	9.351	159.434	2024.99	6215.89	1854.85		516	552.3	11.5755	6584.89	1111.5		516	260.9	18.3663	4249.34	764.206
517	447	9.36233	4978.82	0	0	0		517	379.3	16.2425	2881.39	486.396		517	359	9.4085	4951.85	894.636
518	468.1	9.37967	8969.72	2600.17	1105.09	0		518	366.3	28.5093	11149.4	1888.92		518	607.2	12.117	17545.1	3200.97
519	273.1	9.38233	25742.4	27269.2	11942.9	11871.2		519	357.2	6.27383	7832.46	1335.51		519	514.1	9.883	1282.57	234.066
520	233.1	9.39033	5213.6	3792.4	6004.58	2361.34		520	566.4	23.294	2754.05	474.99		520	948.4	13.6878	5507.26	1016.51
521	484.2	9.393	5171.82	1107.05	3183.28	1650.39		521	547.5	28.7183	3703.37	651.78		521	393	29.0135	19032.6	3523.79
522	472.3	9.39383	0	1445.11	3514.16	5474.13		522	607.2	12.117	23307.5	4116.45		522	396.2	24.594	2075.51	385.623
523	555.4	9.39617	386.506	2827.57	497.14	3077.98		523	297.1	18.1664	3632.85	642.195		523	568.2	13.156	13576.5	2534.14
524	428.1	9.39717	7482.61	1406.55	726.882	660.472		524	396.9	9.9055	2733.67	483.64		524	493.4	24.584	5142.85	965.696
525	446.2	9.40192	16329.6	7887.46	0	4041.31		525	231.9	37.1	12220.7	2205.98		525	943.2	7.46133	3742.93	704.061
526	305.1	9.405	3155.75	8469.91	17325.7	10605.3		526	592.3	16.052	25130	4560.72		526	151.9	15.8507	5562.82	1050
527	289.2	9.40575	0	2788.27	0	3163.06		527	941.5	15.4323	22383.1	4069.36		527	348.1	8.20092	16381.5	3114.76
528	289.1	9.4085	2090.16	4951.85	2092.44	894.636		528	152.1	18.2103	2303.68	420.675		528	152.3	44.7539	2450.98	469.898
529	359	9.4085	1427.93	3830.11	0	0		529	372	1.21833	4410.67	806.873		529	394.1	6.80383	19950.9	3838.9
530	367	9.46175	6580.76	0	4262.06	641.129		530	495.3	13.7458	9982.74	1840.32		530	441.1	18.0616	6623.74	1274.85
531	447.2	9.4655	5366.54	728.196	206.194	0		531	581.4	22.9162	6443.25	1197		531	319.2	17.8957	5107.7	985.099
532	233.2	9.4655	3167.2	0	359.916	0		532	319.2	12.3608	11282.7	2100.27		532	331.4	21.1852	10269.9	1993.49
533	273.2	9.475	3824.67	18786	16218	18547.6		533	446.1	9.2615	10334.5	1925.9		533	433.2	13.8303	5474.28	1069.22
534	428.3	9.48183	3794.97	861.274	2440.22	1441.22		534	632.3	16.0017	4877.77	909.867		534	543.2	10.4318	5314.06	1041.67
535	326.2	9.488	0	0	0	2844.86		535	378.3	28.7968	16211.5	3079.8		535	508.1	9.64167	5373.2	1061.06
536	310	9.49867	0	4576.39	0	0		536	319.2	17.8957	2818.13	542.085		536	559.3	22.899	15004.7	2996.69
537	557.4	9.499	4128.7	1473.28	1803.93	159.673		537	528.4	25.8367	4643.25	896.75		537	492.4	24.6249	19013.8	3806.32
538	555.3	9.51108	349.213	3972.96	5098.16	6509.08		538	375.1	30.0072	4887.02	959.064		538	861.3	9.77083	2721.68	550.066
539	414.2	9.52283	755.098	3004.73	303.16	2844.04		539	999.3	13.1462	2887.17	569.24		539	377.3	28.7633	14307.6	2900.56
540	555.2	9.52408	4732.99	0	3949.46	0		540	718.3	15.1733	3310.25	656		540	569.4	21.386	27474.9	5622.62
541	466.1	9.53417	482.173	8100.97	3107.88	2807.38		541	265.3	23.481	1287.76	257.004		541	319.3	16.5628	2610.78	535.765
542	310.1	9.55242	0	815.24	6590.02	10576.8		542	378.4	28.0425	14021.2	2799.46		542	484.2	9.71933	1665.63	342.593
543	467.1	9.55883	9005.7	3981.46	362.052	2854.76		543	494.3	13.7258	868.977	173.783		543	373	1.163	1988.73	410.564
544	364	9.56717	4035.29	2020.1	0	1861.29		544	151.9	13.4515	1081.11	217.21		544	373.2	27.784	4292.07	887.866
545	909.2	9.57067	0	13127	0	0		545	468.3	24.5675	16362.4	3326.06		545	655.3	15.4507	3511.72	734.603
546	274.9	9.57583	0	0	0	3552.07		546	654.3	15.2012	21514	4414.43		546	437.2	23.9619	4814.08	1011.13
547	326	9.57583	0	0	399.168	2761.67		547	297.2	15.3967	3270.61	671.726		547	440.1	6.02675	3446.34	727.899
548	482.2	9.582	0	0	3329.46	0		548	269	0.578	3864.73	796.337		548	570.3	12.8088	15647.4	3311.92
549	482	9.58758	11462.2	2607.69	0	2801.58		549	395.2	6.84617	3518.41	733.867		549	467.3	24.613	41976.9	9127.28
550	534.2	9.58908	4501.33	196.684	1061.81	5971.68		550	395.1	6.5375	3362.91	706.133		550	376.2	26.5467	15216.7	3319.06
551	426.1	9.59383	18207.6	42898.3	11030.4	33715.1		551	363.2	12.5961	2799.43	590.949		551	466.2	9.653	33747.7	7363.73
552	729.3	9.6	207.083	0	2085.8	0		552	478.8	15.0228	11819	2541.37		552	394.2	8.73033	16317.9	3576.51
553	484.1	9.60067	8399.95	4783.92	6736.94	648.54		553	526.4	28.5367	141892	30565.2		553	317.2	20.287	17387	3824.51
554	309.1	9.60617	4711.15	8475.76	2259.16	0		554	295.2	9.07283	3647.73	788.004		554	282.3	21.6232	4433.24	985.003
555	444.2	9.6145	70013.5	53649.7	134385	164077		555	598.2	12.9082	13641.6	2956.91		555	471.2	10.343	3343.91	745.957
556	910.3	9.6145	15274.9	4563.39	16068.4	16680.2		556	414.1	10.6068	4000.14	868.354		556	111	14.747	5395.06	1205.09
557	507.2	9.617	34784.8	15188.3	32819.7	45475.3		557	605.3	16.9093	5612.81	1220.16		557	653.2	13.1623	3709.39	830.315
558	273.3	9.617	0	0	6940.46	1860.77		558	373.1	12.3612	2086.1	459.733		558	616.4	15.6685	4430.87	995.167
559	445.1	9.61783	18637.9	27973	24027.5	14882.6		559	277.2	9.0695	5062.39	1118.15		559	279.4	7.97617	16350.5	3686.82
560	508.3	9.61783	5216.54	1282.79	0	867.534		560	301.1	23.019	5279.18	1167.06		560	374.4	19.9988	5906.49	1337.78
561	556.2	9.61783	3582.66	823.394	462.16	665.208		561	406.2	12.643	3232.42	716.745		561	652.3	13.1795	27168.1	6228.05
562	911.2	9.61817	0	6976.59	1593.5	5022.28		562	302.3	14.3927	2384.12	530.755		562	206.2	0.6225	2638.62	606.442
563	554.2	9.62358	19880.9	14985.7	17892.7	18455.2		563	305.3	9.85483	4117.29	916.855		563	186.9	36.9808	5238.82	1211.54
564	331.7	9.62433	0	3811.41	0	436.951		564	381.1	10.4343	16994.2	3784.83		564	378.2	10.007	2120.05	497.123
565	467.2	9.62933	891.762	5712.79	10459.1	2200.41		565	578.6	26.1132	4087.55	913.664		565	393.9	36.9602	2881.41	676.052
566	364.3	9.63017	0	188.448	0	3009.91		566	555.2	14.5348	14556.5	3314		566	373.1	18.1015	4056.62	954.355
567	551.9	9.635	0	0	2416.13	633.78		567	377.2	7.84133	6576.82	1514.41		567	470.1	15.041	13158.2	3096.58
568	413.9	9.63517	3220.56	0	0	688.721		568	348	7.44383	975.279	226.389		568	471.1	7.455	5183.35	1226.82
569	909.3	9.63833	63946.9	25619.8	26768.4	44338.7		569	365.1	0.578	63105.5	14702.5		569	269.2	0.560167	2786.41	668.117
570	910.2	9.63833	9820.53	17293.7	4248.24	3072.62		570	402.1	10.6081	59325.1	13859.2		570	570.2	14.295	8341.72	2011.12
571	508.1	9.64167	415.892	5373.2	3682.8	1061.06		571	327.3	23.4299	6405.22	1500.14		571	110.9	39.112	3775.93	920.71
572	911.3	9.64367	7434.77	883.416	4948.08	1359.13		572	515.2	14.4753	6743.72	1582.59		572	394.2	6.93092	9758.6	2382.99
573	373.8	9.64542	2190.47	4282.4	2903.73	0		573	418.1	8.30283	13013.6	3062.34		573	486.1	7.068	12081.5	2972.75
574	365.6	9.64717	1104.3	0	0	3047.21		574	534.2	9.58908	4501.33	1061.81		574	585.2	12.1523	228270	56325.2
575	482.1	9.65008	1464.85	5963.43	7938.48	7015.75		575	406.3	12.5545	3893.25	919.13		575	371.2	23.034	9033.7	2231.72
576	508.2	9.65008	5092.52	1679.02	15224.9	12812		576	282.3	22.049	4727.47	1129.96		576	394.1	37.0347	775.671	192.079
577	427.1	9.65225	6276.38	4754.02	3364.42	3583.86		577	470.2	8.03742	7827.75	1877.86		577	323.5	8.128	820.986	205.376
578	427.2	9.65233	11286.6	8098.26	0	4527.25		578	655.3	15.4507	7575.34	1852.56		578	259.2	11.17	4273.49	1075.84
579	483.1	9.65233	3723.78	1786.45	952.32	0		579	886.2	7.51508	6587.25	1624.05		579	652.3	11.2263	11579.7	2938.46
580	551.1	9.65233	3474.86	0	390.218	502.533		580	370	4.51517	3006.7	742		580	428.3	12.6223	4708.91	1195.81
581	555.1	9.65233	7034.89	1930.14	1845.46	1331.7		581	753.4	23.2575	3397.33	839.655		581	713.5	6.25542	4704.48	1197.77
582	383.1	9.65233	2865.18	0	227.85	0		582	652.4	16.076	4174.77	1035.45		582	886.2	7.51508	87227.6	22368.1
583	466.2	9.653	18447.7	33747.7	12584.3	7363.73		583	151.8	41.8835	2134.18	529.305		583	382.2	10.5653	9631.23	2481.31
584	329.5	9.65983	0	2887.87	1400.47	0		584	395.3	24.5547	80930	20220.3		584	499.3	12.7927	7373.47	1900.64
585	393.2	9.66867	4887.66	0	0	1351.57		585	548.2	10.1203	5089.94	1280.13		585	396.3	24.576	8003.71	2073.91
586	373.3	9.67	0	0	3968.71	0		586	296.3	12.2038	2202.82	561.792		586	999.4	13.1957	11146.5	2905.45
587	330.2	9.67	0	305.679	3704.7	0		587	555.1	9.65233	3723.78	952.32		587	395.1	14.5603	4794.25	1253.82
588	534	9.67283	2564.14	3836.54	2202.42	1257.79		588	111	43.2238	836.74	214.065		588	599.3	13.4273	9575.28	2521.74
589	446.1	9.67417	11545.4	8454.54	3532.07	1389.92		589	582.4	11.0737	2927.68	754.629		589	372.8	15.5045	3030.72	799.738
590	484.3	9.68367	0	0	522.252	3128.06		590	612.3	14.1967	6404.15	1658.12		590	528.4	25.8367	5910.75	1559.95
591	426.2	9.68542	23328.2	15355.1	35162.2	30403.8		591	373.2	43.7457	4533.22	1174.8		591	451.2	24.5473	3876.3	1033.17
592	427	9.688	0	1775.46	6687.13	1677.7		592	187	37.1328	8099.32	2114.32		592	282.3	22.049	1009.44	269.022
593	445.2	9.69108	30302.7	20951	27743.7	41040.7		593	427.2	15.2892	81837.7	21418.4		593	470.2	7.528	48445.4	13009.4
594	466.9	9.70083	0	0	0	2658.95		594	383.1	9.65233	7034.89	1845.46		594	321.1	5.15475	5765.33	1549.74
595	861.4	9.70083	0	0	0	2458.39		595	373	3.887	5000.18	1314.21		595	416.2	8.76533	6533.38	1757.99
596	507.1	9.70083	5388.86	4965.89	9028	12320.4		596	313.3	14.9868	9737.73	2562.11		596	553.3	25.3002	4219.14	1138.81
597	350.2	9.703	2314.36	742.129	0	238.621		597	303.2	17.5065	5293.03	1406.26		597	323.2	8.199	4999.74	1353.98
598	329.6	9.706	1814.96	778.06	6236.64	1666.48		598	424.3	13.1694	5093.9	1362.52		598	259.1	13.0958	13685.3	3722.77
599	484.2	9.71933	3662.61	1665.63	479.532	342.593		599	509.2	16.2615	8415.29	2254.63		599	525.2	24.3643	6565.52	1799.41
600	468.2	9.72125	10855.3	6490.24	10919.2	3317.75		600	455.3	8.67183	4655.94	1247.65		600	418.1	8.30283	13364.4	3684.38
601	374.1	9.73733	1691.61	932.9	214.524	3467.45		601	997.3	13.227	31828.6	8534.06		601	309.2	11.4652	2411.9	667.624
602	397.2	9.73733	1649.41	0	0	3324.93		602	101	0.58	5932.59	1592.16		602	498.3	15.3427	5940.18	1649.85
603	856	9.75017	0	2722.08	0	0		603	379.2	24.9848	7692.97	2064.69		603	396.1	8.306	2511.3	698.405
604	426	9.75367	16008.8	0	0	0		604	571.3	14.2364	12020.1	3260.1		604	404.1	7.61483	4726.54	1339.83
605	909.4	9.759	0	1556.76	4261.2	0		605	598.1	13.014	4810.49	1304.86		605	261	42.335	1358.58	388.523
606	861.3	9.77083	7613.73	2721.68	208.152	550.066		606	481.4	23.9263	6889.48	1890.73		606	566.2	12.1088	8271.15	2366.28
607	396.2	9.77383	22038	8086.85	10004.7	4779.69		607	369.3	8.5525	36200.6	9979.73		607	477.3	12.7307	4183.97	1197.6
608	309	9.777	0	2533.7	3189.85	0		608	857.6	13.315	4633.39	1296.85		608	339.3	26.419	81256.5	23311.4
609	507	9.78567	0	7516.53	0	0		609	432.2	8.41717	5512	1547.52		609	477.2	9.92967	5035.44	1460.27
610	690	9.80433	2540.82	0	0	0		610	432	7.26033	4455.5	1261.4		610	283.4	23.835	6329.3	1837.4
611	910.1	9.80433	3546.76	0	232.824	0		611	456.3	13.9578	4620.76	1308.38		611	376.4	26.6572	6091.23	1770.18
612	444.1	9.839	41684	87462.9	32851.5	6028.8		612	111.2	24.722	1679.77	477.223		612	152	13.103	1669.96	486.867
613	305.3	9.85483	4117.29	0	916.855	0		613	381.2	10.5202	53655.1	15296.8		613	555.3	14.5256	4422.41	1299.12
614	547.1	9.865	0	2649.94	8600.53	0		614	152.3	37.663	2305.25	658.26		614	434.2	10.0553	14518.1	4299.02
615	477.1	9.8825	373.283	0	607.05	2757.58		615	362.1	7.46133	2298.94	658.427		615	317.1	7.9595	4739.03	1409.93
616	525.3	9.8825	2336.41	6116.65	10890	17786.9		616	418.1	10.5937	39532	11337.2		616	652.4	13.2666	9178.54	2741.56
617	498.3	9.8825	0	0	308.352	2470.28		617	394.1	27.6695	7056.89	2024.35		617	497.1	14.6918	5652.81	1689.61
618	514.1	9.883	0	1282.57	2576.86	234.066		618	441.3	18.8176	19986.6	5795.33		618	499.2	12.0478	3241.38	970.718
619	396.9	9.9055	2733.67	0	483.64	0		619	297.6	10.6068	8824.6	2580.74		619	152.2	7.22217	5375.06	1621.7
620	476.1	9.9185	1934.6	635.641	6721.51	13044.1		620	597.3	22.9162	2967.11	869.088		620	455.2	8.29033	8203.44	2491.86
621	161.2	9.919	1373.29	240.974	4102.38	654.581		621	482.2	15.0265	136225	39937		621	622.3	17.5162	23843	7281.33
622	554.3	9.919	1897.77	3970.22	4541.26	2289.84		622	323.4	7.61483	1426.15	424.935		622	718.8	15.3245	74879.7	22901.9
623	477.2	9.92967	943.71	5035.44	1268.82	1460.27		623	413.3	21.6702	10618.7	3169.64		623	344.3	21.634	3199.24	983.025
624	458.2	9.954	225.738	172.188	4264.18	510.377		624	475.3	22.8452	10452.1	3129.12		624	375.1	0.649	5561.6	1712.77
625	507.3	9.95717	3952.77	0	0	0		625	395.1	14.5603	11071.3	3314.62		625	188.1	36.9785	3244.58	1002.93
626	476.2	9.95717	13051.9	13112.3	12084.2	6648.48		626	426.1	11.4036	4396.01	1328		626	379.1	28.5367	70633.7	21996.2
627	526.3	9.97283	874.305	809.43	2683.92	4720.42		627	849.2	8.29033	7801.74	2368.61		627	152.1	44.356	4101.88	1277.84
628	382.2	9.973	746.312	1049.95	1327.36	5301.32		628	446.1	9.67417	11545.4	3532.07		628	999.3	13.1462	6222.79	1938.87
629	547.2	9.97883	11190.2	18681.7	6524.88	14229.5		629	479.4	21.8833	3010.69	950.52		629	580.4	21.1665	13698.1	4268.43
630	376	9.989	0	0	2745.27	0		630	377.4	28.7417	20483	6532.78		630	291	5.94717	3673.8	1153.43
631	434.1	9.98917	14848.3	609.336	1603.96	6698.85		631	359.1	41.72	3679.26	1185.34		631	671.5	21.6047	9342.84	2980.24
632	498.2	9.9905	6229.01	3283.04	2529.37	2214.6		632	379.4	30.1752	6888.42	2251.34		632	574.2	7.61583	5448.4	1740.1
633	394.1	9.99925	4952.82	7324.07	12389.2	7217.54		633	219	0.542	3298.3	1081.99		633	404.2	8.65267	2490.02	799.904
634	378.2	10.007	0	2120.05	2691.34	497.123		634	376.4	21.9943	2344.26	773.19		634	377.2	29.992	13739.1	4417.86
635	548.3	10.0072	5758.93	1616.28	2017.18	5170.68		635	688.4	21.6613	4326.47	1439.55		635	350.2	9.703	742.129	238.621
636	377.9	10.0078	3753.46	0	0	0		636	504.2	15.2892	6803.31	2267.06		636	888.3	7.4465	8700.48	2821.72
637	382.3	10.0078	2992.7	0	1028.2	0		637	416.1	8.8055	9292.98	3107.52		637	483.2	15.342	2804.6	910.811
638	404.1	10.0103	2961.48	819.304	413.22	2662.4		638	492.3	24.5719	23434	7842.82		638	874.2	7.46133	9079.93	2959.68
639	514.2	10.024	4054.45	0	1934.4	1082.45		639	511.3	16.1283	13002.3	4369.42		639	245	41.303	5592.68	1825.77
640	404.2	10.025	2995.93	1149.83	4251.35	1585.21		640	371.1	5.7005	18589.5	6273.19		640	111.1	40.262	513.601	167.644
641	476.3	10.0465	7215.41	2467.66	3729.46	2832.19		641	559.3	22.899	12479.3	4244.69		641	556.1	11.3407	3280.62	1071.49
642	434.2	10.0553	0	14518.1	6168.14	4299.02		642	399.1	22.8452	3619.59	1232.78		642	316	7.95833	15748.7	5156.24
643	526.2	10.102	1075.86	2750.1	10351.3	483.255		643	411.3	15.7797	5642.37	1924.78		643	534	9.67283	3836.54	1257.79
644	548.2	10.1203	5089.94	3282.67	1280.13	9114.37		644	380.2	10.5122	10555.8	3602.02		644	281.3	16.7341	10761.4	3535.62
645	325.3	10.1265	8565.86	0	0	0		645	556.1	11.3407	4104.93	1402.28		645	405.2	10.7548	18994.5	6261.13
646	547.3	10.149	17499.9	5926.14	28473.5	16567.8		646	552.2	11.4708	9073.8	3105.77		646	390.2	13.112	3261.4	1079.48
647	325.2	10.1783	14287.8	21557.1	194.793	437.267		647	382.3	10.0078	2992.7	1028.2		647	391	36.876	2113.18	700.43
648	525.3	10.1807	18448.8	5793.6	9430.56	2997.54		648	341.2	21.5288	4034.22	1389.83		648	498.2	15.076	11779.5	3935.44
649	563.3	10.184	0	1027.05	4020.79	1741.93		649	653.3	13.2643	2604.42	898.114		649	306.2	5.39733	11322.4	3785.67
650	525.2	10.2132	3893.12	6007.9	8366.82	12150.1		650	325.3	6.547	9672.5	3339.07		650	510.3	15.9621	13574.5	4631.93
651	374.2	10.231	1585.19	2146.73	1026.71	6077.42		651	781.3	10.5217	121007	41914.1		651	467.3	21.5453	35671.8	12198
652	476.1	10.2347	0	2494.85	488.835	377.764		652	548.3	10.0072	5758.93	2017.18		652	359.3	23.229	12429.6	4263.19
653	390	10.255	0	184.094	4067.22	0		653	403.2	8.6885	4430.16	1573.04		653	237.1	9.139	2677.34	923.028
654	548.3	10.2827	3977.6	11693.6	8278.85	618.889		654	382.4	23.852	1824.39	650.469		654	524.4	28.7219	25779.4	8906.6
655	471.2	10.343	872.556	3343.91	0	745.957		655	111.2	0.526833	1133.24	404.46		655	466.1	9.53417	8100.97	2807.38
656	543.2	10.4318	994.529	5314.06	1714.38	1041.67		656	599.2	13.3682	3735.94	1352.56		656	468.1	5.70792	2507.66	879.669
657	811	10.4343	3773.6	355.304	188.126	0		657	498.2	11.5227	4013.1	1457.06		657	497.2	15.3154	41701.2	14630.1
658	381.1	10.4343	16994.2	0	3784.83	0		658	371	6.88033	26712.8	9741.04		658	303.1	17.274	4928.82	1731.11
659	399.3	10.45	1536.74	0	2909.7	528.865		659	308.2	9.15025	7393.23	2716.78		659	382.2	11.4223	6290.52	2257.5
660	285.1	10.468	340.901	567.109	4014.22	1945.18		660	675.4	22.1582	3592.96	1326.44		660	152.2	8.0765	1359.32	488.475
661	297.8	10.468	0	1579.83	6773.24	0		661	285.2	22.8849	12619.5	4659.57		661	233.2	15.2713	1050738	379851
662	404.1	10.468	0	1384.55	3211.12	0		662	316	7.95833	10286.4	3807.82		662	152.1	18.9232	8275.92	3002.64
663	425.3	10.4682	1687.26	6524.93	1562.35	3165.34		663	484.5	21.8833	12444.4	4622.89		663	395.4	24.6863	14642.5	5338.93
664	542.1	10.4685	9221.73	0	0	0		664	498.3	15.3427	11172.8	4248.48		664	370.9	1.12583	9497.72	3497.53
665	470.2	10.4685	4703.6	2078.66	291.87	1459.26		665	419.4	26.9058	8810.02	3362.88		665	151.9	21.4228	3023.51	1116.9
666	382.1	10.486	4115.23	2253.37	3777.84	0		666	113	0.648167	7053.49	2698.71		666	781.3	10.5217	104447	38801.4
667	635.3	10.486	3650.4	0	0	307.74		667	359.2	36.9857	2967	1138.09		667	359.4	4.72567	4095.7	1542.78
668	783.3	10.5035	20118.8	9926.92	1276.24	4795.32		668	622.4	17.9387	7479.81	2871.45		668	629.5	21.634	816.119	307.495
669	419.9	10.5035	3012.52	0	374.88	0		669	416.1	6.81133	2051.61	790.128		669	497.3	21.4403	5578.47	2103.97
670	402.2	10.5107	120711	27907.4	96633.2	122019		670	574.3	11.5227	7725.21	2977.12		670	469.2	24.6773	5662.6	2135.82
671	443.1	10.5107	0	2705.11	1837.96	3180.27		671	439.3	16.4542	4418.6	1710.14		671	482.2	15.2878	271014	102959
672	487.2	10.5107	3063.03	1100.4	2688.06	5154.85		672	569.2	13.1795	11320.5	4381.81		672	631.3	15.0913	4005.86	1523.99
673	380.2	10.5122	223092	217537	183284	184115		673	468.3	13.8132	6287.86	2437.23		673	467.2	9.62933	5712.79	2200.41
674	520.2	10.5122	10555.8	3252.08	3602.02	4905.95		674	497.2	15.0228	51433.8	19963.8		674	537.2	6.77767	12131.8	4681.89
675	782.3	10.5158	65655.8	37453.9	46623.9	26645.8		675	395.3	14.8183	1517.35	594.3		675	365.4	23.8175	1338.55	516.8
676	520.3	10.5162	377.098	5972.52	2519.04	6889.52		676	319.3	16.5628	1231.8	482.592		676	373.2	43.7457	3581.1	1382.92
677	770.4	10.5202	3700.06	0	0	0		677	377.3	30.1107	435576	170944		677	497.3	21.2037	4573.9	1770.62
678	381.2	10.5202	53655.1	55994	15296.8	44722.1		678	460.3	15.2	33881.9	13309.4		678	418.2	8.306	6417.54	2485.32
679	289.8	10.521	0	1020.47	2677.48	0		679	389.2	13.1531	17509.9	6910.62		679	321.2	5.06183	1289.23	500.201
680	781.3	10.5217	121007	104447	41914.1	38801.4		680	941.4	15.3427	9564.37	3784.2		680	347.3	16.542	6204.65	2418.72
681	297.7	10.5297	9304.69	4281.91	0	4198.66		681	429.3	24.6596	29459	11746.6		681	223.1	7.358	3110.87	1217.26
682	419.2	10.5297	6334.56	5007.93	3941.08	397.339		682	441.1	15.218	4697.31	1880.79		682	565.6	23.4505	3589.34	1411.02
683	399	10.5297	0	2931.04	0	4927.68		683	414.2	9.52283	755.098	303.16		683	939.4	15.3245	4347.09	1709.06
684	542.3	10.5333	10646.8	12123.6	21764.3	8220.8		684	568.4	25.8205	4476.78	1798.6		684	373.1	2.014	1631.36	646.416
685	399.1	10.5377	5462.02	496.019	695.36	0		685	441.2	15.2803	16867.8	6780.82		685	223.1	19.0377	7450.78	2952.62
686	297.5	10.5404	0	0	2839.58	3553.24		686	728.5	22.8778	6030.02	2425.69		686	562.5	21.6592	3499.06	1387.22
687	418.2	10.5433	0	22642.6	10041.9	17878.2		687	639.4	16.577	8882.43	3578.94		687	372.1	37.086	7692.22	3060.57
688	403.2	10.5486	3145.94	11032.5	5255.48	9080.75		688	259.1	10.9002	8726.32	3537.29		688	566.2	15.2082	3803.28	1515.65
689	403.1	10.5487	14079.7	9423.78	9800.76	11922		689	498.2	9.9905	6229.01	2529.37		689	428.3	11.0153	5148.58	2053.38
690	781.4	10.5528	72698.8	9759.66	44087.9	37392.8		690	374.1	23.348	545.672	223.132		690	587.2	12.1177	6769.19	2700.71
691	381.3	10.557	0	0	16804.3	0		691	511.1	16.2058	3388.76	1387.69		691	998.3	13.197	13917.5	5554.58
692	470.1	10.557	2274.77	872.086	3995.38	0		692	441.2	15.0022	32015.7	13145.7		692	479.2	14.9697	2193.05	879.642
693	382.2	10.5653	5553.43	9631.23	4268.75	2481.31		693	423.3	22.8627	973.567	400.68		693	599.4	21.9502	21825.9	8784.54
694	289.6	10.5655	3299.78	2060.98	4174.28	965.941		694	404	8.786	431.799	177.723		694	439.3	16.4542	5938.18	2394.13
695	404.2	10.5667	778.607	1156.38	849.06	4075.96		695	537.2	6.77767	5758.66	2373.33		695	284	5.39633	11438.1	4636.27
696	783.4	10.5667	7738.99	4112.06	10232.2	9285.74		696	508.3	22.5857	3685.11	1528.28		696	279.1	20.73	1196.82	485.394
697	782.4	10.5857	7271.5	4197.18	0	14332		697	510.3	15.9621	20487.8	8507.59		697	378.1	24.682	1055.44	430.239
698	418.1	10.5937	39532	6308.68	11337.2	5703.31		698	909.3	9.63833	63946.9	26768.4		698	485.3	15.36	4312.18	1763.9
699	161	10.6047	0	340.733	831.765	3769.36		699	259.1	13.0958	14761.8	6203.64		699	362.4	12.4687	7289.57	2996.37
700	412.2	10.6068	8824.6	3584.67	2580.74	5537.73		700	382.3	23.835	9783.14	4139.83		700	555.2	14.5348	14195.5	5854.79
701	414.1	10.6068	4000.14	285.223	868.354	1940.88		701	308.2	6.35017	4149.25	1767.47		701	583.4	22.899	1407.96	582.474
702	297.6	10.6068	4705.34	0	0	3723.37		702	233.2	15.2713	3980.34	1701.3		702	379.4	22.4198	2869.74	1200.61
703	402.1	10.6081	59325.1	64798.9	13859.2	0		703	379.2	21.6893	5398.06	2325.64		703	433.4	23.07	2816.61	1178.39
704	412.3	10.6118	0	2551.45	419.61	0		704	367.3	10.8637	29858.5	12897.8		704	389.2	13.1531	20525.5	8604.57
705	380.1	10.663	11710.3	6072.06	27152.8	8790.97		705	910.2	9.63833	9820.53	4248.24		705	241	5.82417	5799.99	2446.76
706	297.4	10.6655	0	5301.5	0	0		706	407.3	21.5307	4459.42	1929.78		706	581.3	17.274	14383.8	6083.62
707	436.1	10.6762	4956.04	4114.38	591.48	2001.32		707	152	12.1518	4239.53	1837.26		707	337.1	15.2885	9612.48	4066.98
708	414	10.681	0	0	2873.99	0		708	421.2	10.7732	3645.69	1588.55		708	316	7.50167	61960.5	26232
709	531.4	10.681	1374.13	0	2484.17	0		709	557.4	9.499	4128.7	1803.93		709	537.3	25.412	7052.43	2990.53
710	886.8	10.7167	0	0	0	3037.96		710	410.2	13.9548	9816.55	4297.11		710	574.3	11.5227	1813.3	771.297
711	831.3	10.7277	2383.94	0	0	0		711	378.2	19.9977	15172.4	6657.31		711	527.2	15.2523	4654.75	1988.15
712	350	10.734	1181.59	3144.5	4647.03	0		712	111.2	15.9828	3634.97	1600.6		712	736.3	6.23517	1961.42	845.748
713	297.8	10.7453	4166.23	472.481	541.867	0		713	324.2	13.5565	6946.64	3072.85		713	439.2	15.9618	3696.82	1594.46
714	976.5	10.7548	0	3030.54	0	0		714	396.2	9.192	9449.83	4189.87		714	273.1	9.38233	27269.2	11871.2
715	277.1	10.7548	715.883	2843.98	0	463.228		715	681.6	21.7678	5141	2281.6		715	429.3	24.6596	34127.1	14870.7
716	405.1	10.7548	392.912	66231.6	6140.34	1840.83		716	152.1	1.862	8801.75	3915.69		716	295.3	20.2625	2284.18	995.41
717	405.2	10.7548	74883.3	22312.5	41909.4	37916.2		717	337.1	15.2885	10982.6	4896.12		717	511.3	16.1283	8745.78	3869.86
718	406.2	10.7548	6302.27	18994.5	11537.5	6261.13		718	340.2	26.6235	4625.01	2067.17		718	599.5	4.58683	3343.75	1483.54
719	421.2	10.7732	3645.69	6646.98	1588.55	883.642		719	467.4	21.6042	5268.27	2362.17		719	412.2	7.59083	2764.75	1234.34
720	421	10.7793	3345.36	0	0	0		720	579.2	23.0782	3135.36	1407.86		720	371	40.368	43063.8	19277
721	110.9	10.7793	2797.34	0	357.984	0		721	359.2	30.3762	38107.2	17136.4		721	622.4	17.9387	10539.6	4742.35
722	277	10.7804	0	217.087	4958.72	3021		722	366.4	28.5598	3111.66	1405.56		722	578.4	19.7265	11296.5	5125.77
723	351.2	10.787	0	2111.16	2853.59	2975.34		723	309.2	11.4652	4544.96	2056.4		723	461.2	15.2707	5948.82	2729.59
724	403	10.7918	0	1313.89	0	4120.56		724	396.2	9.77383	22038	10004.7		724	261	0.294	2864.46	1314.42
725	261	10.8087	3053.59	4343.82	1401.32	4679.14		725	152.2	16.2455	1012.35	459.846		725	333.5	6.356	1101.92	506.643
726	223.2	10.811	221.509	639.331	0	2413.62		726	534.5	26.7675	13651	6206.05		726	322.1	5.43417	12740.2	5869.17
727	350.1	10.811	0	1903.5	542.672	3942.55		727	468.2	14.5783	5225.65	2376.55		727	555.2	14.1887	14583	6718.25
728	368.3	10.8195	4888.72	1969.56	0	2914.57		728	497.3	21.2037	6078.59	2770.39		728	376.1	26.898	1910.03	881.187
729	369.2	10.822	509.415	0	2511.94	0		729	939.4	15.3245	8277.39	3784.1		729	638.3	15.218	2199.67	1017.98
730	781.2	10.831	3387.7	653.072	0	0		730	570.2	12.2773	13638.4	6247.64		730	260.9	15.9787	5014.5	2335.36
731	367.2	10.836	8973.63	12553	32890.4	32860.1		731	428.1	15.2713	1513.37	694.38		731	370.9	16.187	3923.35	1827.22
732	161	10.84	341.257	0	2868.36	304.057		732	261	10.8087	3053.59	1401.32		732	531.3	11.9223	28834.9	13508.2
733	979.7	10.8485	2214.34	0	0	0		733	440.5	21.902	2723.14	1249.74		733	289.6	10.5655	2060.98	965.941
734	350.3	10.8485	9655.8	1506.05	1474.2	1320.18		734	394.2	8.73033	12881	5923.39		734	428.1	9.39717	1406.55	660.472
735	367.3	10.8637	29858.5	16544.9	12897.8	16553.3		735	385.4	12.4684	7245.84	3348.05		735	622.2	12.116	12046.2	5657.27
736	402	10.893	0	0	3422.94	0		736	205.1	17.345	15436.4	7134.87		736	570.3	12.1088	29271	13759.4
737	406.1	10.893	2122.48	0	4233.99	470.118		737	359.3	23.8045	20867.5	9648.31		737	548.4	28.4655	9982.57	4697.81
738	259.1	10.9002	8726.32	5966.66	3537.29	3820.67		738	582.3	23.0245	2735.15	1265.22		738	479.8	15.0398	936.664	443.522
739	368.2	10.904	6085.6	10543.5	3404.77	7037.06		739	273.1	9.38233	25742.4	11942.9		739	275.2	12.2417	8886.14	4208.48
740	352.1	10.9177	3557.1	2111.71	521.863	1789.9		740	940.4	15.0741	56080.7	26026.5		740	535.3	13.7112	6878.54	3264.17
741	428.2	10.9715	363.871	3786.78	5989.2	5076.58		741	532.2	11.9134	1638.63	765.369		741	454.3	15.927	1650.04	785.826
742	352	10.9898	0	2281.25	0	0		742	319	21.6183	370.066	173.106		742	406.4	12.6333	4729.6	2257.25
743	542.1	11.0045	6544.01	0	0	0		743	242.2	5.48742	12357.8	5787.25		743	427.2	15.2892	2310.03	1104.76
744	542.2	11.0131	6070.27	8760.49	6559.29	17245.5		744	567.3	12.1892	810.695	380.205		744	509.2	11.9137	5699.62	2727.65
745	428.3	11.0153	12571	5148.58	1346.2	2053.38		745	433.3	22.9563	4120.48	1938.13		745	265.3	23.481	3415.34	1635.38
746	937.1	11.021	2511.29	0	0	0		746	955.3	15.3427	4109.89	1933.9		746	317.1	7.48383	7648.52	3666.02
747	450.2	11.021	5730.3	1020.09	0	2882.92		747	319.4	12.5018	4885.95	2304.44		747	632.3	16.0017	1466.51	707.101
748	521.2	11.0255	2687.88	3492.55	0	257.667		748	514.2	10.024	4054.45	1934.4		748	152.1	37.1645	10559.8	5099.13
749	448.2	11.0542	2338.75	2419	3054.76	4650.22		749	321.2	5.06183	7896.98	3768.53		749	783.3	10.5035	9926.92	4795.32
750	405.1	11.0737	9380.65	2839.14	0	1559.2		750	309.1	9.60617	4711.15	2259.16		750	479.3	21.7291	25680.2	12446.9
751	582.4	11.0737	2927.68	0	754.629	894.608		751	347.3	16.542	5317.47	2550.68		751	425.3	10.4682	6524.93	3165.34
752	521.3	11.1162	0	2459.2	583.968	0		752	379.3	28.4655	6069.11	2919.91		752	436.1	10.6762	4114.38	2001.32
753	428.4	11.1292	731.257	621.677	0	2462.78		753	532.2	14.225	3314.54	1598.57		753	310.2	9.19317	97121.5	47416
754	375.3	11.1428	5395.54	0	537.138	177.759		754	961.3	15.1262	528.64	257.211		754	532.2	14.225	22267.9	10901.2
755	652.4	11.159	0	431.158	3236.18	0		755	394.1	6.80383	11668	5681.95		755	499.2	26.7198	2540.23	1244.22
756	259.2	11.17	487.851	4273.49	510.933	1075.84		756	249.3	15.2707	5441.45	2675.44		756	407.3	21.7678	3343.01	1638.48
757	405.3	11.224	0	3321.73	0	173.311		757	281.2	16.7078	2006.52	989.867		757	409.2	15.3153	42210.7	20770.7
758	652.3	11.2263	8512.54	11579.7	1285.31	2938.46		758	346.3	16.4717	64008.6	31590.9		758	381	0.543167	7548.62	3737.29
759	390.2	11.2346	4190.65	2207.4	614.331	2702.3		759	608.3	12.1678	3262.39	1614.48		759	593.3	15.9787	4209.26	2087.6
760	372.2	11.2607	0	3697.42	0	0								760	111	38.0218	3683.53	1831.9
761	556.2	11.319	1571.67	443.322	4126.87	679.683								761	711.6	22.9063	8565.57	4273.77
762	556.3	11.3245	591.842	2712.54	3731.69	171.402								762	521.2	26.7521	11103.7	5543.68
763	223	11.3343	1033.12	960.152	0	2785.68
764	556.1	11.3407	4104.93	3280.62	1402.28	1071.49
765	437	11.3502	0	2957.4	0	388.538
766	904.6	11.3868	0	2467.42	0	0
767	436	11.4013	6112.91	0	7435.42	9437.4
768	426.1	11.4036	4396.01	3661.78	1328	458.287
769	436.1	11.407	4899.62	21431.7	26066.8	25310.8
770	382.2	11.4223	1199.05	6290.52	1911.47	2257.5
771	364.2	11.443	162.703	378.934	4258.62	1293.03
772	437.2	11.459	617.566	2861.17	1383.47	5244.51
773	452.2	11.459	159.273	2646.5	0	0
774	513.2	11.464	5447.47	1350.11	5136.3	3235.91
775	309.2	11.4652	4544.96	2411.9	2056.4	667.624
776	513.1	11.4708	9073.8	1531.65	3105.77	795.951
777	552.2	11.4708	3029.92	1721.72	0	0
778	497.2	11.4762	7569.94	6646.16	4697.06	4572.34
779	574.2	11.4762	0	2737.92	1489.44	0
780	452.1	11.4828	1823.85	1389.63	1067.11	4471.44
781	498.2	11.5227	7725.21	1961.77	2977.12	244.439
782	574.3	11.5227	4013.1	1813.3	1457.06	771.297
783	552.4	11.53	0	2627.28	649.65	0
784	497.3	11.5482	10219.5	9445.66	0	8139.16
785	497.3	11.5567	20816.8	5660.36	2460.41	14440.6
786	498.3	11.5616	0	5781.14	517.194	4266.05
787	552.3	11.5755	6584.89	931.925	1111.5	2192.2
788	371.9	11.5847	0	6230.47	0	0
789	552	11.602	0	1552.64	2260.96	0
790	852.9	11.6793	2274.76	0	0	0
791	414.4	11.7395	0	0	0	2286.24
792	392.9	11.7455	0	6536.16	0	0
793	395	11.749	3256.09	0	0	943.12
794	441.7	11.7818	0	2572.11	0	0
795	436	11.801	4507.58	0	0	0
796	295.2	11.8122	264.39	2541.85	288.32	3070.24
797	261.2	11.8172	1773.24	2283.07	1024.8	0
798	547.2	11.868	5049.26	2400.36	11319.2	7838.31
799	547.1	11.8703	0	5507.73	0	0
800	509.3	11.8885	7876.79	0	7062.69	8058.46
801	532.2	11.9134	1638.63	6091.63	765.369	6228.68
802	509.2	11.9137	1018.16	5699.62	4013.21	2727.65
803	548	11.921	601.138	0	2588.09	0
804	532.3	11.9215	911.729	1727.22	5835.09	4269.68
805	531.3	11.9223	23308.3	28834.9	23513.6	13508.2
806	547.3	11.9225	7195.5	2850.5	0	8262.33
807	510.2	11.939	0	2499.65	5351.92	3292.3
808	509.1	11.9417	0	4220.83	0	0
809	373	11.9585	4323.74	1368.24	341.964	1203.17
810	431.2	11.9598	1937.3	4995.6	2478.28	449.352
811	882.9	11.9778	0	2436.39	0	0
812	548.2	11.992	2293.57	520.488	3472.07	2051.41
813	303.7	11.992	1146.27	0	2520.48	0
814	549.3	12.0275	4567.54	1111.38	2492.51	1585.84
815	570.4	12.028	0	0	0	4215.8
816	531.2	12.0379	812.28	2969.04	1029.26	11206.4
817	499.2	12.0478	0	3241.38	499.485	970.718
818	566.1	12.063	3937.82	0	0	0
819	623.3	12.063	549.497	555.275	4127.64	1467.73
820	606.3	12.0658	15339.3	17465.9	0	28199.2
821	584.3	12.0808	802805	150914	1.18353e+06	946335
822	626.8	12.0808	2243.87	0	334.41	0
823	586.2	12.0809	79901.2	29253.8	65918	23775.3
824	595.9	12.0812	0	0	0	2652.67
825	624.3	12.0812	1395.98	385.533	0	2421.04
826	626.4	12.0812	0	0	372.768	2695.58
827	674.1	12.0812	0	0	218.592	2350.66
828	595.3	12.0975	5705.77	442.097	0	2312.78
829	566.3	12.0979	4697.02	160.879	6017.86	5230.23
830	647.1	12.099	0	0	4225.98	0
831	303.6	12.1017	0	2089.01	0	1636.56
832	566.2	12.1088	2076.72	8271.15	5233.41	2366.28
833	570.3	12.1088	33975.7	29271	37340.1	13759.4
834	606.2	12.1153	60476	45114.7	54041	40155.7
835	622.1	12.1153	14680.4	2031.15	428.745	2458.51
836	647.3	12.1158	5117.68	586.761	0	3811.76
837	622.2	12.116	2003.42	12046.2	19679.8	5657.27
838	607.2	12.117	23307.5	17545.1	4116.45	3200.97
839	587.2	12.1177	4408.4	6769.19	22685.2	2700.71
840	623.2	12.133	5598.7	2594.25	0	6301.6
841	585.3	12.1338	169755	152653	142894	356967
842	608.2	12.1338	0	3229.76	1496.35	3667.92
843	634.8	12.1349	176.704	2235.32	2609.33	173.731
844	587.3	12.1509	8461.41	5820.59	0	13879.7
845	152	12.1518	0	0	0	2680.74
846	571.2	12.1518	4239.53	3021.55	1837.26	5559.63
847	607.3	12.1518	0	2962.96	1927.53	24132.9
848	674.2	12.1518	265.122	1893.22	271.392	2948.92
849	584.2	12.1522	339823	887536	21177.9	116237
850	585.2	12.1523	270382	228270	291279	56325.2
851	548.3	12.1537	11849.8	13095.7	10419.5	7365.12
852	608.3	12.1678	3262.39	401.593	1614.48	484.922
853	378.6	12.1687	669.98	0	1090.74	3373.51
854	567.3	12.1892	810.695	4888.38	380.205	614.26
855	296.3	12.2038	2202.82	467.135	561.792	2729.42
856	586.3	12.2146	51610	76028.6	41953.5	83580.6
857	571.4	12.24	0	0	5405.15	0
858	607	12.2404	0	3150.6	8402.62	0
859	275.2	12.2417	403.965	8886.14	2365.92	4208.48
860	274.3	12.2647	27053.1	21603.9	59484.5	45231.6
861	275.1	12.2737	6488.18	2178.41	0	2714.28
862	275.3	12.276	1042.53	247.141	11490.3	2954.27
863	548.4	12.276	0	2075.94	9263.76	0
864	570.2	12.2773	13638.4	15721.6	6247.64	21426.1
865	152.1	12.2913	271.998	1723.52	1238.4	5504.35
866	274.2	12.2942	0	17163.8	22688.2	10211.3
867	319.2	12.3608	11282.7	5302.15	2100.27	0
868	373.1	12.3612	2086.1	3743.56	459.733	3292.64
869	318.4	12.364	0	20364.3	0	0
870	111	12.364	2506.3	3249.15	0	314.126
871	548.2	12.3788	7594.7	2891.54	0	13514.9
872	340.3	12.3967	21493.8	19332.3	29430.2	12674.4
873	318.3	12.4078	124667	48933.3	136290	113044
874	320.2	12.4135	2908.82	177.953	1691.73	665.184
875	385.4	12.4684	7245.84	913.884	3348.05	0
876	362.4	12.4687	8920.59	7289.57	5231.1	2996.37
877	571.4	12.471	0	0	2481.6	690.829
878	431	12.484	3705.14	990.639	0	719.515
879	340.2	12.5	15425.3	1318.56	9484.94	20555
880	319.4	12.5018	4885.95	4063.43	2304.44	5511.76
881	385.2	12.5177	0	894.262	0	3569.06
882	384.3	12.5364	16899.4	8791.64	15583.1	32206.2
883	431.2	12.5375	691.063	9696.64	3076.12	188.416
884	363.3	12.5456	6518	4669.13	663.223	0
885	428.4	12.5517	0	0	3402.65	2567.32
886	406.3	12.5545	3893.25	1960.74	919.13	0
887	363.4	12.5546	0	450.993	6149.06	4820.06
888	385.3	12.559	0	994.756	4665.76	0
889	152.1	12.5692	442.259	1555.89	861.867	6341.78
890	362.3	12.5706	44693.7	31317.5	39105.5	46272.5
891	384.4	12.5832	3017.1	8257.92	11938	0
892	341.3	12.5867	0	0	359.34	2914.13
893	363.2	12.5961	2799.43	2517.5	590.949	6790.25
894	318.2	12.6142	8684.61	1891.53	0	33876.7
895	359.4	12.6223	0	6820.04	0	0
896	428.3	12.6223	0	4708.91	4193.36	1195.81
897	406.4	12.6333	566.902	4729.6	5594.88	2257.25
898	385.1	12.6382	0	0	593.509	3749.22
899	406.2	12.643	3232.42	0	716.745	751.95
900	570.2	12.657	961.993	8406.86	4987.49	1403.19
901	888.7	12.678	2486.76	0	0	0
902	477.3	12.7307	5367.6	4183.97	288.32	1197.6
903	499.2	12.754	4394.35	3453.13	4011.41	3326.78
904	499.3	12.7927	0	7373.47	2895.74	1900.64
905	570.3	12.8088	3569.67	15647.4	4524.12	3311.92
906	675.3	12.8723	4068.52	1415.34	0	0
907	598.2	12.9082	13641.6	1171.21	2956.91	836.516
908	469.1	12.9123	1398.89	1926.29	1906.13	7505.02
909	599.2	12.9123	1982.87	1221.82	1734.88	4083.39
910	499.1	12.9287	583.579	603.506	1567.71	2772.19
911	675.4	12.961	4563.3	173.091	0	0
912	598.1	13.014	4810.49	0	1304.86	0
913	562.4	13.02	1673	0	2831.98	794.446
914	373.2	13.02	0	775.403	2575.58	0
915	551.1	13.0283	7268.26	7651.6	682.057	0
916	551.2	13.032	18944.4	1253.98	0	4726.91
917	598.4	13.0477	0	0	2240.91	7354.97
918	390.1	13.049	4894.11	1548.02	0	0
919	562.3	13.0617	716.083	3164.1	0	0
920	453.3	13.091	383.918	0	6370.94	1033.7
921	259.1	13.0958	14761.8	13685.3	6203.64	3722.77
922	152	13.103	3489.36	1669.96	0	486.867
923	367.1	13.103	4841.31	1900.95	664.214	1165.51
924	495.4	13.1079	4966.09	2663.23	0	0
925	390.2	13.112	914.622	3261.4	747.733	1079.48
926	371	13.1225	9544.04	18521.4	0	14809.6
927	569.3	13.133	6249.94	602.419	3615.18	5366.7
928	999.3	13.1462	2887.17	6222.79	569.24	1938.87
929	568.3	13.1502	8316.45	4340.24	4815.81	20869.3
930	389.2	13.1531	17509.9	20525.5	6910.62	8604.57
931	568.2	13.156	12713.9	13576.5	19379.9	2534.14
932	389.1	13.162	818.397	10416.1	7277.89	1709.02
933	997.4	13.162	6936.34	0	15882	5078.36
934	653.2	13.1623	0	3709.39	0	830.315
935	424.3	13.1694	5093.9	0	1362.52	3773.12
936	569.2	13.1795	831.4	7153.61	1375.34	319.756
937	652.3	13.1795	9478.48	19820.9	5957.22	11963.6
938	998.4	13.1795	11320.5	27168.1	4381.81	6228.05
939	999.4	13.1957	2180.22	11146.5	4198.23	2905.45
940	998.3	13.197	9294.49	13917.5	10139	5554.58
941	259.2	13.2034	8008.3	6205.1	4762.58	7353.28
942	584.4	13.2172	0	0	3024.58	4534.15
943	997.3	13.227	31828.6	88442	8534.06	10300.3
944	625.1	13.262	2531.28	0	0	0
945	653.3	13.2643	2604.42	5422.42	898.114	495.017
946	652.4	13.2666	2018.63	9178.54	0	2741.56
947	857.6	13.315	0	2619.26	0	0
948	998.2	13.315	0	6790.08	0	0
949	469.2	13.315	4633.39	3913.84	1296.85	2653.9
950	324.3	13.351	2919.24	0	1748.74	0
951	598.3	13.352	44556.1	26788.3	44649.6	30008.3
952	620.2	13.3658	979.668	4102.2	0	219.475
953	373	13.3682	3735.94	1143.87	1352.56	2080.57
954	599.2	13.3682	14341.8	4867.15	1476.31	4434.66
955	359.1	13.3702	0	0	0	3812.47
956	324.1	13.4106	1466.38	4078.43	3708.8	6437
957	600.2	13.4167	3616.91	4967.82	3205.58	663.445
958	599.3	13.4273	5485.41	9575.28	6051.54	2521.74
959	598.2	13.4439	4835.83	20562.2	0	10471.3
960	151.9	13.4515	1081.11	3570.14	217.21	0
961	620.3	13.4515	177.738	3631.25	751.896	189.868
962	629.2	13.4572	2704.42	187.429	1429.23	0
963	997.4	13.4678	5011.05	4815.61	0	839.842
964	469	13.5232	0	0	0	2521.55
965	613.3	13.5542	1709.37	2724.48	0	0
966	324.2	13.5565	1058.23	1467.91	1823.81	5060.01
967	373.1	13.5565	6946.64	3251.61	3072.85	4762.68
968	495.1	13.606	0	5211.19	768.96	0
969	536.2	13.623	0	0	2260.96	1314.52
970	454.1	13.6237	7221.78	13682.8	7629.66	0
971	534.2	13.6497	15796.1	32221.4	22006.8	18317.1
972	575.2	13.6527	10287.3	0	0	0
973	494.2	13.6553	35107.7	27444.9	23865.9	21125.3
974	460.3	13.658	1528.78	3348.84	3213.61	7086.51
975	575.3	13.658	11920	26726.7	25581.5	16600.1
976	536.3	13.6708	4980.94	330.347	423.87	697.208
977	415.1	13.6708	11615.5	5189.19	0	0
978	495.2	13.6753	4019.04	1822.35	5287.28	12096.7
979	949.4	13.6753	2853.93	2448.92	4223.04	3804.34
980	851.4	13.6846	5783.71	11650	25014.6	15044.3
981	948.4	13.6878	3022.44	5507.26	5240.15	1016.51
982	438.2	13.6925	12507.5	30103.4	26579.9	38146.5
983	510.3	13.6925	1355.11	743.185	0	5481.55
984	416.2	13.6935	1158.03	6732.93	3797.59	5644.17
985	852.3	13.6935	1308.99	5877.33	0	331.154
986	415.2	13.694	7892.22	18266.9	56820.3	59602.7
987	535.2	13.7058	7127.17	2346.79	4837.23	324.266
988	416.1	13.7097	1022.14	0	4840.61	8613.46
989	453.2	13.7099	116803	125936	243465	126066
990	437.2	13.711	103250	119395	242348	137983
991	576.4	13.711	475.516	0	3408	914.377
992	852.4	13.711	4046.3	671.563	11617	15785.5
993	535.3	13.7112	3748.47	6878.54	4269.58	3264.17
994	494.3	13.7258	3429.73	0	6606.65	13948.5
995	853.4	13.7258	868.977	2018.96	173.783	4325.16
996	948.5	13.7343	3149.53	601.923	0	4862.01
997	454.2	13.7425	19761.7	12606.7	24869.9	42016.6
998	534.3	13.743	12889.5	5407.43	12194.6	15368.7
999	949.5	13.743	0	739.734	0	4686.38
1000	495.3	13.7458	9982.74	4291.95	1840.32	2932.18
1001	439.2	13.7555	1094.05	4437.29	3290.51	584.913
1002	271	13.7602	0	0	846.675	2620.87
1003	851.3	13.7625	787.595	0	8290.88	9391.01
1004	510.2	13.7933	0	168.12	1271.61	3299.2
1005	456.2	13.7952	6502.56	1596.95	4581.6	2166.87
1006	494.1	13.7952	7936.35	828.529	4965.04	1448.35
1007	438.1	13.8	1424.59	0	9972.98	1903.8
1008	453.1	13.8013	98566.7	91689.1	90939.3	123476
1009	468.3	13.8132	6287.86	500.807	2437.23	1876.74
1010	433.2	13.8303	2917.78	5474.28	3469.87	1069.22
1011	415.3	13.8607	4298.2	4691.06	0	12413.7
1012	455.2	13.8687	45974.4	29704.8	26175	28102.2
1013	456.1	13.8688	0	4194.03	1603.78	0
1014	495.1	13.906	1731.14	7755.86	5858.43	180.845
1015	852.2	13.942	0	0	3630.53	0
1016	410.2	13.9548	9816.55	1077.73	4297.11	1240.29
1017	456.3	13.9578	4620.76	1816.08	1308.38	4706.78
1018	373.1	13.9607	0	616.371	407.04	2664.66
1019	438.2	13.9767	9758.82	11307.1	13971.9	19231.8
1020	453.2	14.0193	20461.6	22537.3	61645.7	32119.3
1021	373.3	14.026	2696.64	0	0	0
1022	410.3	14.03	1329.22	0	3399.44	462.452
1023	438.3	14.084	2037.45	0	6575.31	0
1024	593.3	14.0973	4507.69	1237.11	3363.13	2411.9
1025	393.2	14.111	0	0	485.64	5000.16
1026	609.2	14.1171	2550.38	0	2156.29	221.641
1027	609.3	14.1338	4303	4930.13	304.38	0
1028	372.2	14.172	695.384	0	6009.55	0
1029	555.2	14.1887	4314.52	14583	2212.15	6718.25
1030	612.3	14.1967	6404.15	6363.37	1658.12	240.542
1031	532.2	14.225	3314.54	3904	1598.57	4372.72
1032	554.2	14.225	43466.6	22267.9	26312.8	10901.2
1033	571.3	14.2364	12020.1	13478.9	3260.1	8119.56
1034	555.3	14.2505	5310.09	3885.18	7197.27	2792.73
1035	570.3	14.2517	9859.06	10151.6	16209.3	12789.8
1036	570.2	14.295	12456.1	8341.72	6958.35	2011.12
1037	373	14.296	0	0	2851.2	0
1038	532.3	14.3138	9082.94	4606.76	9722.98	7066.43
1039	302.2	14.349	435.307	1964.58	5537.07	0
1040	554.3	14.3858	45336.4	67837.5	28912.3	41745.9
1041	302.3	14.3927	2384.12	806.974	530.755	5815.11
1042	515.1	14.42	1260.37	0	3969.64	927.648
1043	532.4	14.4263	498.396	525.229	0	2197.94
1044	372.2	14.4592	801.587	504.997	0	4219.54
1045	318.3	14.4744	0	2203.28	7925.62	7340.15
1046	515.2	14.4753	6743.72	2796.45	1582.59	7287.34
1047	468.3	14.509	0	557.551	3635.23	442.493
1048	318.4	14.5242	7184.68	0	5349.36	3110.49
1049	555.3	14.5256	8763.3	4422.41	4430.87	1299.12
1050	555.4	14.5257	0	0	0	3500.64
1051	555.2	14.5348	14556.5	14195.5	3314	5854.79
1052	359.3	14.5603	11071.3	1965.53	3314.62	328.88
1053	395.1	14.5603	6058.96	4794.25	728.057	1253.82
1054	437.3	14.5657	0	4194.13	0	2238.93
1055	468.2	14.5783	5225.65	2545.88	2376.55	3027.26
1056	437.1	14.58	0	1409.17	5791.51	2202.9
1057	612.1	14.584	1375.07	3602.02	0	0
1058	371.8	14.6592	0	0	0	3061.96
1059	515.4	14.6667	2925.25	0	0	968.063
1060	161.1	14.669	1065.06	1940.79	5876.64	1918.69
1061	468.1	14.686	837.906	0	2208.62	0
1062	497.1	14.6918	2319.41	5652.81	1732.12	1689.61
1063	549.3	14.738	3717.11	389.936	307.166	0
1064	554.4	14.739	0	2746.41	4515.4	0
1065	111	14.747	1825.92	5395.06	4100.72	1205.09
1066	437	14.756	3024.18	926.47	2567.47	0
1067	333.1	14.7827	452.028	2597.62	0	382.369
1068	394	14.7912	4779.54	667.739	0	980.256
1069	395.3	14.8183	1517.35	2344.26	594.3	0
1070	393	14.8805	10841.7	6362.07	7550.54	0
1071	437.3	14.881	0	0	5094.96	377.833
1072	527.4	14.894	0	213.514	1742.02	4839.96
1073	334.1	14.894	0	0	310.354	4195.48
1074	313.2	14.9447	569.384	1547.49	0	9278.74
1075	481.3	14.9447	627.295	12704.1	3910.4	112506
1076	428.1	14.9517	4857.98	0	627.984	0
1077	294.2	14.9618	0	778.169	774.823	3248.25
1078	551.3	14.9697	4129.37	2193.05	2805.67	879.642
1079	479.2	14.9697	4154.71	851.663	0	0
1080	718.4	14.9792	228.104	0	0	2327.25
1081	940.3	14.9815	0	5006.5	0	0
1082	313.3	14.9868	9737.73	1594.54	2562.11	1644.63
1083	409.2	14.9955	11157	11610.7	7653.09	14461.9
1084	441.3	14.9955	0	963.375	779.58	9440.36
1085	462	14.9955	0	1009.51	0	2569.61
1086	312.3	15.0022	32015.7	11097.9	13145.7	16562.9
1087	441.2	15.0022	15198.6	7324.6	1184.41	3709.67
1088	528.3	15.0048	2857.99	456.767	2848.42	605.326
1089	461.4	15.005	0	0	3065.52	0
1090	429.3	15.0128	0	508.971	1052.23	2835.03
1091	527.2	15.0128	2660.52	1481.77	1984.22	6051.54
1092	941.4	15.0172	7432.97	6190.08	0	5370.09
1093	482.3	15.0196	0	14824.9	71241.2	20991.8
1094	470.3	15.0228	11819	0	2541.37	6748.38
1095	478.8	15.0228	7997.92	1756.48	621.27	0
1096	497.2	15.0228	51433.8	37686.8	19963.8	25624.1
1097	337.3	15.023	0	3770.06	9145.15	3575.42
1098	543.3	15.023	0	384.757	3996.94	0
1099	293.2	15.0263	6199.58	3755.53	5986.14	10376.1
1100	482.2	15.0265	136225	76588.7	39937	73707.1
1101	478.2	15.0314	5929.54	7399.02	19290.1	1185.83
1102	461.3	15.0333	4172.13	5464.8	618.765	6720.05
1103	479.8	15.0398	2524.75	936.664	0	443.522
1104	409.1	15.0398	16006.7	0	8118.74	0
1105	293.3	15.041	1431.45	4394.72	4848.44	0
1106	373	15.041	0	4343.37	5097.09	758.452
1107	428.2	15.041	14039.5	13158.2	7614.93	3096.58
1108	483.2	15.041	8876.94	5473.78	7636.24	0
1109	470.1	15.041	0	1192.96	3266.21	0
1110	500.3	15.041	0	0	2757.22	1091.94
1111	718.5	15.0465	0	1235.14	0	2330.38
1112	939.4	15.0468	92331.3	61530.9	46244.4	39589.9
1113	427.2	15.0475	57774.6	62130.6	55257.8	59576.8
1114	284.8	15.0538	0	2537.57	0	0
1115	313.1	15.0538	0	3331.32	0	0
1116	770.6	15.058	5261.68	171.205	273.448	160.23
1117	471.2	15.058	4664.53	787.709	0	0
1118	956.3	15.058	6135.69	0	331.2	0
1119	470.8	15.0584	5650.04	2517.63	7977.74	0
1120	285.2	15.0631	2511.95	1514.96	4699.73	2847.29
1121	312.2	15.0722	1489.87	9819.3	0	0
1122	940.4	15.0741	56080.7	31780.9	26026.5	19278.2
1123	371	15.076	15297.7	11779.5	9066.17	3935.44
1124	498.2	15.076	8309.09	3333.08	13752.7	4424.82
1125	941.5	15.076	715.929	4592.34	10604.8	2685.73
1126	961.4	15.076	4361.12	1740.55	3790.33	2031.13
1127	233.1	15.076	1147.94	0	3155.62	0
1128	478.9	15.076	0	843.169	6436.32	0
1129	462.3	15.0812	182.495	0	572.4	4651.56
1130	503.3	15.0849	2655.3	2211.12	5661.52	3487.26
1131	293.7	15.0895	0	2675	0	349.194
1132	631.3	15.0913	3674.86	4005.86	2515.88	1523.99
1133	721.9	15.094	6086.22	0	0	0
1134	498.1	15.0945	6962.56	3870.92	0	3796.74
1135	497.1	15.0956	1008.21	2397.31	14110.4	23207
1136	483.3	15.0964	3677.24	11692.3	13603.2	26382.2
1137	941.3	15.1078	13899.8	5700.1	476.055	3755.21
1138	955.4	15.111	7007.83	1195.33	680.031	2239.34
1139	478.1	15.1241	0	0	3269.38	10025.5
1140	961.3	15.1262	0	2321.09	0	0
1141	654.4	15.1262	528.64	6735.06	257.211	0
1142	638.4	15.129	4420.42	7774.77	14164.3	9720.68
1143	498	15.1445	0	3984.71	480.18	0
1144	616.3	15.147	2014.48	3868.81	5610.82	5683.91
1145	460.2	15.1618	22714.3	8490.6	12634.6	5066.2
1146	292.9	15.165	3784.99	413.567	0	533.066
1147	718.3	15.1733	3310.25	2841.91	656	466.4
1148	395.2	15.1802	2922.86	4267.12	194.133	477.588
1149	549.2	15.1827	3029.33	2061.97	1594.81	8818.69
1150	654.1	15.183	0	0	3104.68	0
1151	411.3	15.185	700.157	0	508.25	3201.43
1152	460.3	15.2	33881.9	38208.8	13309.4	20507.8
1153	654.3	15.2012	21514	16432.3	4414.43	19520.4
1154	566.2	15.2082	2475.95	3803.28	3744	1515.65
1155	441.1	15.218	8917.39	6039.17	7428.37	1058.18
1156	503.1	15.218	4697.31	1124.74	1880.79	0
1157	638.3	15.218	26934.6	36202.7	38717.6	31997.2
1158	655.3	15.218	988.958	2199.67	3993.02	1017.98
1159	459.2	15.2193	81691.5	120769	176154	89018.5
1160	359.2	15.236	2016.51	3168.97	3980.06	2105.93
1161	489.3	15.236	467.073	495.824	0	3724.99
1162	617.3	15.236	2884.07	2403.22	8882.27	5024.55
1163	292.8	15.2523	0	2546.02	0	0
1164	527.2	15.2523	1146.09	4654.75	0	1988.15
1165	616.4	15.253	1166.75	1939.75	9510.45	2398.85
1166	249.3	15.2707	0	3023.53	0	0
1167	461.2	15.2707	5441.45	5948.82	2675.44	2729.59
1168	617.2	15.2707	1320.65	7489.08	2951.62	3834.77
1169	372.3	15.2712	3515.42	0	0	0
1170	478.3	15.2712	13018.9	0	12268	3471.91
1171	233.2	15.2713	0	0	0	2097.22
1172	428.1	15.2713	1513.37	0	694.38	5280.26
1173	481.2	15.2713	494772	1050738	385298	379851
1174	527.3	15.2713	3980.34	563.972	1701.3	5088.44
1175	939.5	15.2715	0	0	17177.9	27717.9
1176	441.2	15.2803	16867.8	3401.43	6780.82	13553.7
1177	482.2	15.2878	116785	271014	87194.7	102959
1178	337.1	15.2885	10982.6	9612.48	4896.12	4066.98
1179	427.1	15.289	0	0	35961.4	0
1180	639.4	15.289	0	12527.1	25372.3	15696.3
1181	427.2	15.2892	81837.7	64842.6	21418.4	67846.6
1182	504.2	15.2892	6803.31	2310.03	2267.06	1104.76
1183	459.3	15.3058	25570.9	18751.5	26221.9	63225.7
1184	499.2	15.3062	5345.85	9352.55	5763.85	5570.49
1185	962.4	15.3063	7412.58	1072.06	1080.97	1332.59
1186	616.2	15.3063	6391.98	0	0	1461.43
1187	655.2	15.307	0	0	3918.34	0
1188	428.2	15.3151	11848.3	12748	15126	7188.48
1189	409.2	15.3153	19935.2	42210.7	17036.4	20770.7
1190	497.2	15.3154	52360.2	41701.2	32181.4	14630.1
1191	394.1	15.3235	1759.32	1501.87	1308.88	3460
1192	285.3	15.3245	2041.44	5122.47	0	784.052
1193	718.8	15.3245	327.047	4347.09	296.537	1709.06
1194	939.4	15.3245	97485.8	74879.7	16202.7	22901.9
1195	961.4	15.3245	8277.39	7300.91	3784.1	3927.14
1196	410.3	15.3319	0	3312.94	1387.69	2415.82
1197	499.1	15.333	2869.72	0	3403.27	0
1198	470.1	15.3413	0	585.515	0	3685.14
1199	940.5	15.3413	0	0	1905.02	9623.74
1200	483.2	15.342	17284.5	13041.9	22087.7	13343
1201	500.2	15.342	2941.43	2804.6	6808.66	910.811
1202	498.3	15.3427	11172.8	9933.4	4248.48	9548.71
1203	941.4	15.3427	9564.37	5940.18	3784.2	1649.85
1204	955.3	15.3427	4109.89	1335.35	1933.9	1010.19
1205	485.3	15.36	2694.61	595.297	3516.63	342.922
1206	567.3	15.36	5648.97	1717	3641.89	1111.79
1207	284.9	15.36	0	4312.18	0	1763.9
1208	470.4	15.36	674.873	0	3185.84	0
1209	514.3	15.376	0	0	0	2789.81
1210	640.3	15.3783	2708.3	0	0	0
1211	654.4	15.3783	0	7569.46	0	0
1212	470.2	15.3783	3766.13	6153.14	0	207.397
1213	513.4	15.3856	0	0	6065.32	8522.92
1214	638.4	15.395	0	8379.67	11567.8	4936.2
1215	297.2	15.3967	3270.61	0	671.726	251.083
1216	428.3	15.4138	2390.7	2494.85	1347.22	0
1217	409.1	15.431	1409.42	3347.91	8709.64	2080.78
1218	295.2	15.4322	1350.67	3846.74	0	0
1219	482.3	15.4323	22383.1	5864.86	4069.36	0
1220	941.5	15.4323	2856.9	0	464.34	203.01
1221	655.3	15.4507	7575.34	3511.72	1852.56	734.603
1222	656.4	15.4648	0	1638.77	227.91	2442.53
1223	513.3	15.4862	0	5242.76	1611.35	3617.02
1224	497.3	15.5032	24379.8	36646	26080.4	28808.4
1225	372.8	15.5045	379.685	3030.72	0	799.738
1226	513.2	15.505	4907.02	0	742.26	0
1227	295	15.5588	2392.72	3968.71	197.95	246.071
1228	395.2	15.5588	1266.73	3474.42	1917	1847.25
1229	498.4	15.5595	5943.6	1958.04	0	0
1230	452.3	15.5713	1830.94	560.797	1919.79	25750.9
1231	427.1	15.5713	9296.28	0	0	10615.9
1232	441.3	15.578	4600.99	2583.78	711.42	0
1233	357.4	15.6078	0	675.597	863.9	3084.81
1234	513.4	15.6108	1713.63	9991.56	4297.6	1425.75
1235	319.1	15.6169	2905.05	4760.19	4678.94	2940.36
1236	279.3	15.6327	3292.5	977.867	307.09	0
1237	452.2	15.6657	20697	3579.03	19892.1	22471.1
1238	616.4	15.6685	979.123	4430.87	2015.9	995.167
1239	261	15.679	0	1126.51	3803.83	934.343
1240	639.2	15.686	0	4449.57	535.68	0
1241	409	15.697	0	0	0	2463.88
1242	293.3	15.706	2926.66	0	0	0
1243	394	15.7797	5642.37	3200.4	1924.78	1638.06
1244	411.3	15.7797	3821.87	622.179	0	0
1245	482.1	15.7962	0	10701.4	2933.02	1143.12
1246	151.9	15.8507	899.525	5562.82	460.908	1050
1247	454.4	15.856	3938.96	385.433	5222.44	918.28
1248	481.3	15.856	0	0	13416.4	5657.44
1249	453.3	15.8683	19838	5633.02	14193.4	24778.4
1250	509.2	15.89	18627	929.359	2694.56	3776.27
1251	452.1	15.9071	7141.89	4692.76	4621.94	0
1252	510.2	15.909	0	245.836	5269.26	3290.66
1253	454.3	15.927	1876.27	1650.04	3683.02	785.826
1254	481.1	15.9463	6933.46	0	0	339.327
1255	591.3	15.9518	37599	32974.1	39324.7	32312.5
1256	592.2	15.9602	0	5993.6	3831.87	497.768
1257	439.2	15.9618	4982.07	3696.82	4208.71	1594.46
1258	510.3	15.9621	20487.8	13574.5	8507.59	4631.93
1259	260.9	15.9787	1068.29	5014.5	0	2335.36
1260	593.3	15.9787	6218.41	4209.26	0	2087.6
1261	111.2	15.9828	3634.97	1361.54	1600.6	685.165
1262	509.3	15.9887	46948.9	52776.8	40477.1	43761.9
1263	632.3	16.0017	4877.77	1466.51	909.867	707.101
1264	453.4	16.0367	2719.13	6703.84	1399.78	0
1265	511.4	16.0432	0	880.728	389.79	2844.86
1266	638.2	16.0432	1454.01	2453.49	0	7549.76
1267	592.3	16.052	25130	12136.8	4560.72	6336.13
1268	591.2	16.076	14238.2	3125.6	0	2620.72
1269	652.4	16.076	4174.77	1784.89	1035.45	185.553
1270	593.2	16.086	5098.26	2949.7	6042.9	2859.12
1271	655.2	16.104	608.707	288.504	4227.28	1535.34
1272	511.3	16.1283	13002.3	8745.78	4369.42	3869.86
1273	593.4	16.1328	5311.16	561.955	494.16	4098.12
1274	592.4	16.157	2501.47	703.654	3495.88	0
1275	370.9	16.187	9686.28	0	0	0
1276	359.1	16.187	5541.85	3923.35	0	1827.22
1277	453.1	16.193	1587.69	0	7573.7	0
1278	591.4	16.193	0	0	5399.81	1748.62
1279	511.1	16.2058	3388.76	0	1387.69	0
1280	457.5	16.2268	565.05	0	0	2983.99
1281	379.3	16.2425	2881.39	0	486.396	351.875
1282	152.2	16.2455	1012.35	0	459.846	4438.1
1283	509.2	16.2615	8415.29	2597.45	2254.63	2226.05
1284	393	16.3007	0	6421.5	3467.26	6036.7
1285	457.3	16.317	577.425	210.279	3175.76	3222.35
1286	509.4	16.3313	1405.5	4438.49	752.94	4290.16
1287	941.7	16.3548	2097.55	0	0	0
1288	373	16.3727	2531.55	665.289	0	1831.88
1289	368.2	16.4071	3093.05	0	3760.39	4508.64
1290	346.4	16.4089	7785.69	2935.03	23333.2	11082.7
1291	347.4	16.441	883.943	3772.08	5956.14	2165.86
1292	279.1	16.447	6118.88	2100.98	168.018	2695.93
1293	439.3	16.4542	4418.6	5938.18	1710.14	2394.13
1294	457.4	16.4653	1301.15	4014.22	5480.49	2478.64
1295	346.3	16.4717	64008.6	33367.3	31590.9	37752.4
1296	111.2	16.4848	4091.73	1202.07	0	2366.03
1297	347.3	16.542	5317.47	6204.65	2550.68	2418.72
1298	617.2	16.559	967.666	352.296	0	2192.6
1299	319.3	16.5628	1231.8	2610.78	482.592	535.765
1300	368.3	16.5628	7175.97	5286.4	3755.58	3031.26
1301	457.5	16.565	1528.01	330.601	2574.74	826.201
1302	504.2	16.565	0	0	3623.14	4140.93
1303	639.4	16.577	8882.43	1468.04	3578.94	2283.9
1304	505.8	16.5778	0	0	0	3137.38
1305	616.3	16.6	674.42	726	4100.05	0
1306	321.2	16.6623	12279.5	6040.39	10484.1	713.245
1307	617.3	16.7065	3963.04	2300.86	0	2013.93
1308	504.9	16.707	0	0	3512.84	0
1309	281.2	16.7078	2006.52	4069.33	989.867	2446.47
1310	321.1	16.7252	0	5510.88	0	475.15
1311	281.3	16.7341	6028.28	10761.4	5305.3	3535.62
1312	321.3	16.778	0	4916	3670.72	4192.3
1313	959.8	16.7805	2336.24	0	0	0
1314	370.9	16.795	0	0	9860.05	0
1315	363	16.831	0	0	3833.6	2571.82
1316	550	16.849	0	0	4584.53	0
1317	362.5	16.8543	0	0	0	3474.24
1318	377.3	16.884	406.896	0	3514.67	0
1319	512.3	16.887	0	11225.1	268.903	1447.54
1320	512.4	16.8918	8305.58	8983.26	823.834	474.431
1321	362.2	16.9092	0	0	0	4188.1
1322	605.3	16.9093	5612.81	3524.3	1220.16	0
1323	371.8	16.9222	706.744	3384.41	0	0
1324	381.3	16.99	889.191	1585.51	3918.49	2693.55
1325	507.1	16.99	0	0	3179.21	268.791
1326	661.3	17.0558	1827.98	512.087	0	4966.94
1327	110.9	17.0642	0	2662.72	0	1998.99
1328	346.1	17.0932	4241.78	287.582	312.228	420.854
1329	362.9	17.1103	1533.6	0	0	2802.68
1330	359.4	17.1105	4932.02	1581.7	0	0
1331	471.2	17.114	0	903.745	3926.91	617.139
1332	371.2	17.1345	5220.66	12727.4	0	1764.35
1333	546	17.1647	0	0	390.069	3401.61
1334	362.3	17.168	0	704.483	5107.58	1971.64
1335	547.2	17.168	0	0	6410.63	1281.06
1336	362.4	17.1829	1026.25	5035.55	524.875	10378.2
1337	547	17.1832	167.629	0	0	3070.5
1338	373.2	17.22	4171.71	1293.15	2427.4	993.508
1339	318.2	17.2222	0	3357.95	0	2836.96
1340	279.2	17.229	9243.88	6272.04	15201.5	4039.49
1341	205.2	17.2372	0	665.595	0	8486.36
1342	545	17.238	0	0	9347.91	1484.43
1343	302.2	17.2728	20199	12180.3	3326.28	16654.6
1344	437.1	17.2728	0	214.209	650.469	2394.62
1345	302.1	17.274	13155.7	14383.8	27071.9	6083.62
1346	303.1	17.274	868.408	4928.82	2437.29	1731.11
1347	581.3	17.274	7035.25	17385.4	6759.77	19749
1348	581.2	17.274	8424.85	2059.64	0	0
1349	342.3	17.2813	0	2680.74	406.83	5248.32
1350	317.1	17.2907	57373.8	54724.5	40094.7	31682.3
1351	392.8	17.2912	0	0	0	3894.44
1352	302	17.2913	14374.4	0	0	0
1353	465.3	17.2913	5909.49	161.471	362.434	1337.17
1354	579.3	17.2913	251471	255569	132580	276963
1355	467.3	17.2916	1571.36	0	7280.03	4534.4
1356	580.3	17.2918	91404.7	88055.7	95318.7	101327
1357	280	17.292	223.964	1546.53	5710.73	955.114
1358	581.4	17.292	0	1781.66	9870.75	1975.61
1359	373.3	17.308	0	2753.11	0	0
1360	318.8	17.3095	0	0	0	3102.62
1361	301.2	17.3174	174671	181452	190527	99314.4
1362	279.1	17.3175	10890.4	13274.1	15253.5	17418.7
1363	301.1	17.318	98375.5	122237	61131.4	169718
1364	318	17.327	925.946	2746.11	7367.42	1647.59
1365	371	17.327	0	2488.42	10892.6	0
1366	318.1	17.3278	12870.4	6626.94	7387.35	4388.51
1367	740.2	17.3278	0	0	216.823	3252.86
1368	437.3	17.3357	3474.48	246.971	4798.15	0
1369	205.1	17.345	15436.4	10653.1	7134.87	11990.8
1370	247.4	17.3602	0	3278.48	0	0
1371	580.2	17.3602	0	20462.9	0	0
1372	466.3	17.3632	6878.9	941.204	6517.42	2251.9
1373	512.5	17.3765	301.465	2260.9	430.26	0
1374	247.1	17.3809	1129.72	1811.3	6674.13	6595.34
1375	317.8	17.3815	0	0	0	2294.06
1376	279.3	17.3997	4963	0	0	2510.48
1377	279	17.4168	1904.09	0	1901.04	7360.36
1378	623.4	17.4785	0	3555.26	2372.28	3586.6
1379	303.2	17.5065	5293.03	864.226	1406.26	3963.97
1380	622.3	17.5162	1961.64	23843	22765.3	7281.33
1381	622.4	17.524	24346.6	3150.23	1684.5	14007.4
1382	638.3	17.5455	2822.67	6948.41	3177.6	6415.34
1383	349.2	17.5455	0	3584.21	0	209.122
1384	623.2	17.56	597.54	1761.07	1263.74	3693.42
1385	623.3	17.5688	6511.06	4071.49	3719.12	3993.71
1386	622.2	17.664	892.761	0	6671.64	0
1387	580.2	17.6667	0	1307.92	0	8295.16
1388	302	17.6668	7170.9	0	5241.74	0
1389	317	17.682	4684.3	8180.59	9652.47	12689.3
1390	580.4	17.699	2358.79	0	10358.3	3012.93
1391	205	17.7017	3733.89	1306.1	0	1949.01
1392	302.3	17.7545	3678.19	0	0	0
1393	505.9	17.7558	0	0	1816.89	2518.56
1394	301.1	17.7562	44200.8	59187.1	22503.6	36288
1395	579.3	17.7629	55493.6	24968.6	68241.5	42621.8
1396	369.3	17.77	0	163.371	7623.87	5367.54
1397	302.2	17.8088	7868.3	7621.05	6925.68	15173.6
1398	638.4	17.8268	0	1810.7	1766.47	4958.64
1399	369.4	17.859	0	695.846	8795.14	5007.96
1400	319.2	17.8957	2818.13	5107.7	542.085	985.099
1401	622.4	17.9387	7479.81	10539.6	2871.45	4742.35
1402	425.3	17.9508	189.651	843.559	0	4771.01
1403	579.4	17.965	0	0	5485.5	0
1404	369.2	17.965	778.702	0	4456.32	2800.33
1405	579.2	17.9688	680.636	5239.21	0	5309.54
1406	638.2	17.9708	2407.1	9662.43	1257.77	1286
1407	369.1	17.9867	2886.38	5011.89	0	0
1408	297.3	18.004	523.967	4033.85	1150.85	0
1409	827.4	18.036	0	722.606	3397.3	411.753
1410	425.2	18.054	15888.2	19300.4	28358.1	34885.3
1411	441.1	18.0616	5592.32	6623.74	0	1274.85
1412	319.3	18.0705	6181.26	558.728	0	2181.35
1413	373.1	18.1015	0	4056.62	1794.14	954.355
1414	426.3	18.107	1836.29	874.087	7418.79	1953.04
1415	827.3	18.107	1190.37	0	3598.83	0
1416	152	18.1093	0	0	946.785	3080.11
1417	441.2	18.1149	5592.56	0	15089.8	9148.22
1418	393.2	18.1348	0	8425.27	1180.21	0
1419	442.2	18.142	1034.14	292.816	4035.28	2023.23
1420	425.1	18.142	0	1180.35	11776.8	0
1421	419.3	18.1632	1966.04	1327.51	2674.15	7209.12
1422	371	18.1632	2675.05	0	0	9375.97
1423	297.1	18.1664	3632.85	3120.52	642.195	1932.15
1424	301	18.198	2503.53	3684.59	0	8277.53
1425	394	18.1997	880.333	8400.72	2431.82	483.407
1426	152.1	18.2103	2303.68	0	420.675	391.139
1427	425.3	18.2332	0	2505.53	1060	0
1428	379.3	18.32	2703.12	1860.7	3095.45	1834.32
1429	354.1	18.337	0	717.163	2737.06	600.726
1430	260.9	18.3663	358.174	4249.34	0	764.206
1431	441.1	18.374	271.902	0	2460.67	3674.38
1432	437.3	18.3825	0	3421.72	318.933	0
1433	372.9	18.4625	1281.39	0	0	2846.1
1434	441.3	18.4986	537.133	4886.1	6183.72	0
1435	379	18.532	0	270.98	3658.27	391.226
1436	939.4	18.5355	1885.48	4865.98	0	0
1437	437.2	18.5403	5449.01	1568.27	668.568	0
[truncated: 1,165 more rows]

## Sheet: A. flavus-Tepotinib
Supplementary Table 6 - Mass spectrometry data from metabolome analysis of pathogenic fungi treated with drugs.
[truncated: 3,764 more rows]

[truncated: 14 more sheets: A. flavus-Ibrutinib, A. flavus-Eltrombopag, M. circinelloides-Tepotinib, M. circinelloides-Ibrutinib, M. circinelloides-Eltrombopag, F. oxysporum-Tepotinib, F. oxysporum-Ibrutinib, F. oxysporum-Eltrombopag, C. neoformans-Tepotinib, C. neoformans-Ibrutinib, C. neoformans-Eltrombopag, C. gattii-Tepotinib, C. gattii-Ibrutinib, C. gattii-Eltrombopag]
