# Supplementary material for: CsdA-LaeB hub governs Aspergillus fumigatus virulence via FqC biosynthesis
Source: Research Square preprint supplement (doi:10.21203/rs.3.rs-6615529/v1), 2025-06-12
Supplement: Supplementary file 4 [file b18719be5fa7181542d519b3.xlsx]

## Sheet: Sheet1
Supplementary Table 5 - Affinity data for FDA-approved drug with target.
Protein_ligands	Affinity(kcal/mol)	RMSD l.b.	RMSD u.b.	Ki(Kd) (298K,nM)
NpgA-936727_05_8-1	-9.862	0	0	57.9535
NpgA-936563_96_1-1	-9.576	0	0	93.9619
NpgA-1358715_18_0-1	-9.519	0	0	103.462
NpgA-936727_05_8-2	-9.472	1.993	2.87	112.013
NpgA-936727_05_8-3	-9.416	4.908	10.9	123.13
NpgA-936727_05_8-4	-9.383	1.574	2.415	130.19
NpgA-152459_95_5-1	-9.301	0	0	149.538
NpgA-1100598_32_0-1	-9.224	0	0	170.316
NpgA-1358715_18_0-2	-9.187	4.462	6.892	181.304
NpgA-1611493_60_7-1	-9.164	0	0	188.489
NpgA-496775_61_2-1	-9.136	0	0	197.62
NpgA-1100598_32_0-2	-9.128	2.272	3.814	200.31
NpgA-103177_37_3-1	-9.111	0	0	206.147
NpgA-936727_05_8-5	-9.078	3.332	4.909	217.968
NpgA-936727_05_8-6	-9.034	2.855	3.754	234.791
NpgA-937272_79_2-1	-9.033	0	0	235.188
NpgA-1100598_32_0-3	-9.03	2.454	4.728	236.383
NpgA-936727_05_8-7	-9.013	4.524	10.6	243.272
NpgA-496775_61_2-2	-9.01	2.956	4.505	244.508
NpgA-496775_61_2-3	-9.008	3.173	11.05	245.336
NpgA-1358715_18_0-3	-8.979	3.942	5.622	257.657
NpgA-763113_22_0-1	-8.973	0	0	260.282
NpgA-1350653_20_1-1	-8.971	0	0	261.163
NpgA-1225278_16_9-1	-8.967	0	0	262.934
NpgA-1611493_60_7-2	-8.965	3.861	9.469	263.824
NpgA-936563_96_1-2	-8.944	1.446	1.851	273.354
NpgA-1350653_20_1-2	-8.92	0.05867	1.522	284.667
NpgA-103177_37_3-2	-8.92	1.741	4.011	284.667
NpgA-1358715_18_0-4	-8.915	3.79	10.19	287.082
NpgA-936563_87_0-1	-8.909	0	0	290.007
NpgA-1358715_18_0-5	-8.902	3.74	5.439	293.458
NpgA-93479_97_1-1	-8.884	0	0	302.52
NpgA-1051375_10_0-1	-8.861	0	0	314.508
NpgA-152459_95_5-2	-8.842	1.678	4.413	324.769
NpgA-22888_70_6-1	-8.837	0	0	327.524
NpgA-1029712_80_8-1	-8.836	0	0	328.078
NpgA-1358715_18_0-6	-8.83	5.906	10.63	331.421
NpgA-1691249_45_2-1	-8.825	0	0	334.233
NpgA-1132935_63_7-1	-8.82	0	0	337.069
NpgA-10238_21_8-1	-8.819	0	0	337.639
NpgA-1691249_45_2-2	-8.815	1.916	2.479	339.929
NpgA-1691249_45_2-3	-8.804	1.793	2.376	346.306
NpgA-10238_21_8-2	-8.795	3.458	5.03	351.612
NpgA-496775_61_2-4	-8.792	3.147	11.04	353.399
NpgA-1358715_18_0-7	-8.786	3.833	10.65	357
NpgA-503612_47_3-1	-8.785	0	0	357.604
NpgA-936727_05_8-8	-8.784	4.082	10.15	358.209
NpgA-518048_05_0-1	-8.782	0	0	359.421
NpgA-1100598_32_0-4	-8.778	2.016	11.72	361.859
NpgA-1703793_34_3-1	-8.776	0	0	363.084
NpgA-1051375_10_0-2	-8.77	4.032	8.893	366.783
NpgA-496775_61_2-5	-8.765	2.893	10.75	369.895
NpgA-103177_37_3-3	-8.761	7.166	11.49	372.404
NpgA-1051375_16_6-1	-8.758	0	0	374.296
NpgA-1358715_18_0-8	-8.746	1.571	1.98	381.963
NpgA-496775_61_2-6	-8.741	1.737	2.251	385.204
NpgA-103177_37_3-4	-8.727	4.771	11.63	394.424
NpgA-103177_37_3-5	-8.713	1.909	3.412	403.866
NpgA-1358715_18_0-9	-8.713	3.697	5.422	403.866
NpgA-496775_61_2-7	-8.709	1.445	1.906	406.605
NpgA-167933_07_5-1	-8.708	0	0	407.292
NpgA-548_73_2-1	-8.699	0	0	413.534
NpgA-1225278_16_9-2	-8.692	2.336	11.27	418.454
NpgA-93479_97_1-2	-8.689	4.045	5.461	420.58
NpgA-1703793_34_3-2	-8.686	4.072	12.07	422.718
NpgA-936727_05_8-9	-8.683	5.04	10.78	424.866
NpgA-763113_22_0-2	-8.679	2.536	11	427.747
NpgA-66898_62_2-1	-8.671	0	0	433.568
NpgA-152459_95_5-3	-8.669	1.839	2.2	435.036
NpgA-1691249_45_2-4	-8.667	3.097	4.611	436.509
NpgA-763113_22_0-3	-8.665	5.999	11.03	437.986
NpgA-726169_73_9-1	-8.661	0	0	440.957
NpgA-1095173_27_5-1	-8.659	0	0	442.449
NpgA-763113_22_0-4	-8.651	4.79	9.368	448.471
NpgA-911417_87_3-1	-8.649	0	0	449.989
NpgA-1225278_16_9-3	-8.642	2.187	11.44	455.343
NpgA-10238_21_8-3	-8.634	3.793	5.439	461.54
NpgA-93479_97_1-3	-8.634	2.091	3.337	461.54
NpgA-1051375_16_6-2	-8.631	4.055	9.069	463.885
NpgA-1420477_60_6-1	-8.617	0	0	474.989
NpgA-516_35_8-1	-8.6	0	0	488.831
NpgA-202189_78_4-1	-8.587	0	0	499.687
NpgA-651_48_9-1	-8.584	0	0	502.227
NpgA-1100598_32_0-5	-8.583	1.956	3.28	503.076
NpgA-69004_03_1-1	-8.577	0	0	508.202
NpgA-144598_75_4-1	-8.572	0	0	512.514
NpgA-516_35_8-2	-8.57	2.252	2.778	514.249
NpgA-911417_87_3-2	-8.566	5.703	9.785	517.736
NpgA-1825352_65_5-1	-8.566	0	0	517.736
NpgA-763113_22_0-5	-8.565	3	4.499	518.612
NpgA-1100598_32_0-6	-8.559	1.733	2.712	523.896
NpgA-1351636_18_4-1	-8.555	0	0	527.449
NpgA-911417_87_3-3	-8.544	2.448	4.742	537.344
NpgA-22888_70_6-2	-8.533	2.172	9.887	547.425
NpgA-34552_84_6-1	-8.533	0	0	547.425
NpgA-1029712_80_8-2	-8.53	1.851	3.133	550.207
NpgA-1051375_10_0-3	-8.527	2.392	3.19	553.003
NpgA-93479_97_1-4	-8.525	2.596	12.02	554.875
NpgA-911417_87_3-4	-8.525	3.308	7.982	554.875
NpgA-93479_97_1-5	-8.524	3.198	11.95	555.813
NpgA-171596_29_5-1	-8.521	0	0	558.638
NpgA-1825352_65_5-2	-8.519	1.754	2.677	560.529
NpgA-1492952_76_7-1	-8.519	0	0	560.529
NpgA-508_99_6-1	-8.514	0	0	565.285
NpgA-1611493_60_7-3	-8.506	1.343	2.047	572.978
NpgA-356_12_7-1	-8.503	0	0	575.889
NpgA-103177_37_3-6	-8.495	6.164	9.718	583.727
NpgA-144598_75_4-2	-8.495	7.703	10.91	583.727
NpgA-10238_21_8-4	-8.494	4.007	5.382	584.714
NpgA-123447_62_1-1	-8.487	0	0	591.671
NpgA-1703793_34_3-3	-8.486	2.26	2.974	592.672
NpgA-1637781_04_4-1	-8.481	0	0	597.7
NpgA-93479_97_1-6	-8.481	1.904	2.759	597.7
NpgA-1226781_44_7-1	-8.479	0	0	599.723
NpgA-103177_37_3-7	-8.476	3.46	9.371	602.771
NpgA-496775_61_2-8	-8.464	2.747	3.614	615.118
NpgA-763113_22_0-6	-8.455	2.221	2.725	624.543
NpgA-911417_87_3-5	-8.454	1.715	2.466	625.599
NpgA-726169_73_9-2	-8.449	1.804	2.704	630.907
NpgA-29094_61_9-1	-8.449	0	0	630.907
NpgA-1492952_76_7-2	-8.446	2.129	3.417	634.113
NpgA-202189_78_4-2	-8.44	1.917	3.474	640.575
NpgA-1132935_63_7-2	-8.439	0.9461	1.597	641.658
NpgA-516_35_8-3	-8.438	2.748	3.231	642.743
NpgA-1611493_60_7-4	-8.437	8.88	11.29	643.83
NpgA-93479_97_1-7	-8.436	2.09	12.16	644.919
NpgA-911417_87_3-6	-8.435	5.911	9.475	646.009
NpgA-937272_79_2-2	-8.434	1.39	1.918	647.102
NpgA-1351636_18_4-2	-8.432	2.574	3.245	649.292
NpgA-936563_96_1-3	-8.431	1.809	2.347	650.39
NpgA-202189_78_4-3	-8.43	1.074	1.256	651.49
NpgA-1051375_16_6-3	-8.427	4.184	9.138	654.801
NpgA-1350653_20_1-3	-8.411	1.627	2.203	672.745
NpgA-103177_37_3-8	-8.409	1.854	2.428	675.022
NpgA-1691249_45_2-5	-8.409	3.072	3.692	675.022
NpgA-144598_75_4-3	-8.408	2.276	3.308	676.164
NpgA-1691249_45_2-6	-8.407	2.383	2.893	677.307
NpgA-1051375_10_0-4	-8.406	2.605	4.059	678.453
NpgA-25046_79_1-1	-8.405	0	0	679.6
NpgA-763113_22_0-7	-8.401	2.283	2.817	684.209
NpgA-841301_32_4-1	-8.4	0	0	685.366
NpgA-93479_97_1-8	-8.399	3.918	10.73	686.525
NpgA-144598_75_4-4	-8.399	3.628	10.53	686.525
NpgA-1655504_04_3-1	-8.397	0	0	688.849
NpgA-1637781_04_4-2	-8.393	1.458	3.779	693.52
NpgA-911417_87_3-7	-8.388	6.169	10.44	699.404
NpgA-167933_07_5-2	-8.388	5.332	10.2	699.404
NpgA-106266_06_2-1	-8.388	0	0	699.404
NpgA-496775_61_2-9	-8.386	2.672	3.366	701.772
NpgA-22888_70_6-3	-8.383	1.835	3.22	705.338
NpgA-763113_22_0-8	-8.383	2.917	10.65	705.338
NpgA-103177_37_3-9	-8.382	3.774	11.62	706.531
NpgA-1420477_60_6-2	-8.381	8.716	12.35	707.726
NpgA-25046_79_1-2	-8.38	3.126	4.226	708.923
NpgA-1611493_60_7-5	-8.37	1.874	2.68	721.003
NpgA-1825352_65_5-3	-8.369	0.9543	1.816	722.222
NpgA-171596_29_5-2	-8.367	2.72	6.634	724.667
NpgA-1100598_32_0-7	-8.358	1.839	2.391	735.771
NpgA-1825352_65_5-4	-8.357	2.512	10.63	737.016
NpgA-1825352_65_5-5	-8.355	2.219	10.45	739.51
NpgA-10238_21_8-5	-8.354	5.114	11.99	740.761
NpgA-1825352_65_5-6	-8.353	2.666	10.54	742.014
NpgA-913611_97_9-1	-8.352	0	0	743.269
NpgA-74050_98_9-1	-8.349	0	0	747.046
NpgA-144598_75_4-5	-8.347	4.027	9.954	749.575
NpgA-302962_49_8-1	-8.346	0	0	750.842
NpgA-1513857_77_6-1	-8.345	0	0	752.112
NpgA-1611493_60_7-6	-8.343	1.792	2.668	754.658
NpgA-879085_55_9-1	-8.341	0	0	757.213
NpgA-1420477_60_6-3	-8.34	6.508	10.83	758.493
NpgA-1611493_60_7-7	-8.339	4.078	9.738	759.776
NpgA-1100598_32_0-8	-8.339	2.574	11.52	759.776
NpgA-1260075_17_9-1	-8.339	0	0	759.776
NpgA-1611493_60_7-8	-8.338	8.743	11.31	761.061
NpgA-1825352_65_5-7	-8.337	1.982	2.518	762.348
NpgA-1809336_39_7-1	-8.335	0	0	764.928
NpgA-599_79_1-1	-8.334	0	0	766.222
NpgA-936563_87_0-2	-8.334	1.217	1.717	766.222
NpgA-763113_22_0-9	-8.332	6.822	9.207	768.816
NpgA-1225278_16_9-4	-8.332	7.008	12.17	768.816
NpgA-163521_12_8-1	-8.331	0	0	770.116
NpgA-1691249_45_2-7	-8.331	4.615	11.17	770.116
NpgA-518048_05_0-2	-8.33	3.139	4.377	771.418
NpgA-1100598_32_0-9	-8.325	2.33	11.37	777.963
NpgA-1256580_46_7-1	-8.325	0	0	777.963
NpgA-133099_04_4-1	-8.323	0	0	780.596
NpgA-508_99_6-2	-8.323	2.135	3.448	780.596
NpgA-146939_27_7-1	-8.313	0	0	793.898
NpgA-150915_41_6-1	-8.312	0	0	795.241
NpgA-599_79_1-2	-8.311	1.187	2.038	796.586
NpgA-936563_96_1-4	-8.311	1.628	2.224	796.586
NpgA-123447_62_1-2	-8.31	2.592	3.533	797.933
NpgA-937272_79_2-3	-8.31	2.471	4.071	797.933
NpgA-1029712_80_8-3	-8.306	2.166	3.188	803.344
NpgA-1513857_77_6-2	-8.306	0.06803	2.455	803.344
NpgA-1703793_34_3-4	-8.305	4.37	6.462	804.702
NpgA-911417_87_3-8	-8.3	2.612	4.795	811.53
NpgA-1825352_65_5-8	-8.296	1.795	10.25	817.033
NpgA-856867_55_5-1	-8.296	0	0	817.033
NpgA-1056634_68_4-1	-8.295	0	0	818.415
NpgA-10238_21_8-6	-8.295	4.103	11.83	818.415
NpgA-508_99_6-3	-8.294	1.708	2.146	819.799
NpgA-108612_45_9-1	-8.292	0	0	822.574
NpgA-152459_95_5-4	-8.285	2.021	3.238	832.361
NpgA-1825352_65_5-9	-8.285	1.769	10.35	832.361
NpgA-1655504_04_3-2	-8.282	2.826	3.56	836.591
NpgA-167933_07_5-3	-8.281	1.865	3.091	838.006
NpgA-163521_12_8-2	-8.279	5.267	10.38	840.842
NpgA-1691249_45_2-8	-8.279	8.113	10.87	840.842
NpgA-1225278_16_9-5	-8.278	2.603	11.94	842.264
NpgA-936563_87_0-3	-8.277	1.875	2.533	843.689
NpgA-25046_79_1-3	-8.275	1.424	1.589	846.545
NpgA-123447_62_1-3	-8.274	1.977	3.037	847.976
NpgA-508_99_6-4	-8.274	2.381	10.12	847.976
NpgA-1393477_72_9-1	-8.27	0	0	853.727
NpgA-1350653_20_1-4	-8.269	2.732	4.514	855.171
NpgA-1056634_68_4-2	-8.268	1.651	12.05	856.617
NpgA-608141_41_9-1	-8.267	0	0	858.065
NpgA-1393477_72_9-2	-8.267	0.1804	3.145	858.065
NpgA-1051375_10_0-5	-8.265	2.967	4.623	860.97
NpgA-1056634_68_4-3	-8.263	1.504	1.845	863.885
NpgA-106516_24_9-1	-8.262	0	0	865.345
NpgA-87760_53_0-1	-8.261	0	0	866.809
NpgA-93479_97_1-9	-8.26	4.122	5.331	868.275
NpgA-1350653_20_1-5	-8.258	2	3.672	871.214
NpgA-897016_82_9-1	-8.257	0	0	872.687
NpgA-144598_75_4-6	-8.256	1.299	2.017	874.163
NpgA-1446502_11_9-1	-8.256	0	0	874.163
NpgA-1225278_16_9-6	-8.255	3.325	11.88	875.641
NpgA-66898_62_2-2	-8.253	4.799	9.035	878.605
NpgA-841301_32_4-2	-8.252	4.982	8.299	880.091
NpgA-152459_95_5-5	-8.249	2.559	4.609	884.564
NpgA-14605_22_2-1	-8.246	0	0	889.059
NpgA-29094_61_9-2	-8.245	3.298	11.78	890.562
NpgA-937272_79_2-4	-8.243	2.799	9.457	893.577
NpgA-726169_73_9-3	-8.238	2.222	11.16	901.158
NpgA-1225278_16_9-7	-8.237	2.964	11.92	902.682
NpgA-1420477_60_6-4	-8.236	7.985	12.21	904.209
NpgA-1691249_45_2-9	-8.233	7.342	10.75	908.804
NpgA-937272_79_2-5	-8.231	5.822	8.471	911.88
NpgA-106266_06_2-2	-8.231	1.655	2.396	911.88
NpgA-146464_95_1-1	-8.23	0	0	913.423
NpgA-66898_62_2-3	-8.229	4.504	7.712	914.967
NpgA-1350653_20_1-6	-8.228	2.552	3.073	916.514
NpgA-1616493_44_7-1	-8.221	0	0	927.419
NpgA-1420477_60_6-5	-8.22	2.194	3.776	928.987
NpgA-1217486_61_7-1	-8.22	0	0	928.987
NpgA-1143532_39_1-1	-8.218	0	0	932.132
NpgA-106266_06_2-3	-8.212	4.208	10.51	941.63
NpgA-913611_97_9-2	-8.212	2.478	2.966	941.63
NpgA-911417_87_3-9	-8.211	2.366	4.197	943.223
NpgA-1611493_60_7-9	-8.21	3.859	10.03	944.818
NpgA-842133_18_0-1	-8.209	0	0	946.416
NpgA-302962_49_8-2	-8.207	0.9931	1.563	949.619
NpgA-123447_62_1-4	-8.205	6.093	8.395	952.834
NpgA-516_50_7-1	-8.205	0	0	952.834
NpgA-897016_82_9-2	-8.204	2.517	11.95	954.445
NpgA-1029712_80_8-4	-8.204	1.901	2.365	954.445
NpgA-1029712_80_8-5	-8.2	1.148	2.206	960.918
NpgA-1260075_17_9-2	-8.198	3.382	11.11	964.171
NpgA-123447_62_1-5	-8.198	3.272	10.5	964.171
NpgA-74050_98_9-2	-8.197	3.637	9.522	965.801
NpgA-1051375_10_0-6	-8.193	9.939	12.37	972.351
NpgA-36505_84_7-1	-8.192	0	0	973.995
NpgA-302962_49_8-3	-8.184	3.229	11.94	987.25
NpgA-74050_98_9-3	-8.18	3.683	9.7	993.946
NpgA-133099_04_4-2	-8.177	8.52	11.23	998.997
NpgA-34161_24_5-1	-8.177	0	0	998.997
NpgA-152459_95_5-6	-8.175	1.781	2.193	1002.38
NpgA-508_99_6-5	-8.175	2.296	3.769	1002.38
NpgA-856867_55_5-2	-8.173	7.507	11.88	1005.77
NpgA-726169_73_9-4	-8.172	2.202	11.3	1007.47
NpgA-1051375_10_0-7	-8.17	8.571	11.34	1010.88
NpgA-1029712_80_8-6	-8.169	4.121	7.169	1012.59
NpgA-599_79_1-3	-8.169	9.735	11.52	1012.59
NpgA-163521_12_8-3	-8.163	4.131	7.198	1022.91
NpgA-2921_57_5-1	-8.162	0	0	1024.64
NpgA-1703793_34_3-5	-8.162	4.269	11.78	1024.64
NpgA-1354690_24_6-1	-8.16	0	0	1028.11
NpgA-74050_98_9-4	-8.155	3.995	9.422	1036.83
NpgA-1637781_04_4-3	-8.153	5.045	11.51	1040.34
NpgA-1351636_18_4-3	-8.153	6.405	8.445	1040.34
NpgA-10238_21_8-7	-8.152	5.325	11.9	1042.1
NpgA-1051375_16_6-4	-8.151	4.646	9.397	1043.86
NpgA-133099_04_4-3	-8.15	4.989	10.39	1045.63
NpgA-10238_21_8-8	-8.149	4.063	12.02	1047.4
NpgA-864070_44_0-1	-8.147	0	0	1050.94
NpgA-1051375_16_6-5	-8.147	8.628	11.03	1050.94
NpgA-1446502_11_9-2	-8.147	3.949	7.376	1050.94
NpgA-52_01_7-1	-8.147	0	0	1050.94
NpgA-51264_14_3-1	-8.146	0	0	1052.72
NpgA-319460_85_0-1	-8.146	0	0	1052.72
NpgA-1985605_59_1-1	-8.143	0	0	1058.07
NpgA-913611_97_9-3	-8.143	0.8787	1.809	1058.07
NpgA-74050_98_9-5	-8.143	5.93	7.932	1058.07
NpgA-74050_98_9-6	-8.142	3.745	10.06	1059.86
NpgA-202189_78_4-4	-8.141	1.64	2.186	1061.65
NpgA-2921_57_5-2	-8.139	1.989	3.295	1065.24
NpgA-123447_62_1-6	-8.138	1.036	1.739	1067.05
NpgA-913611_97_9-4	-8.138	4.596	11.28	1067.05
NpgA-1029712_80_8-7	-8.135	2.732	4.515	1072.47
NpgA-486460_32_6-1	-8.133	0	0	1076.1
NpgA-150915_41_6-2	-8.13	0.978	1.997	1081.57
NpgA-167933_07_5-4	-8.129	1.456	2.063	1083.4
NpgA-22888_70_6-4	-8.127	2.167	9.144	1087.06
NpgA-106266_06_2-4	-8.127	3.825	10.6	1087.06
NpgA-50_04_4-1	-8.125	0	0	1090.74
NpgA-625115_55_1-1	-8.125	0	0	1090.74
NpgA-73_48_3-1	-8.122	0	0	1096.29
NpgA-147403_03_0-1	-8.122	0	0	1096.29
NpgA-1260075_17_9-3	-8.121	2.715	10.94	1098.14
NpgA-1225278_16_9-8	-8.121	2.128	2.529	1098.14
NpgA-74050_98_9-7	-8.121	3.79	10.07	1098.14
NpgA-518048_05_0-3	-8.12	2.33	4.082	1100
NpgA-152459_95_5-7	-8.12	3.085	11.38	1100
NpgA-1029712_80_8-8	-8.12	3.996	7.073	1100
NpgA-25046_79_1-4	-8.12	4.929	11.6	1100
NpgA-937272_79_2-6	-8.118	2.723	7.923	1103.72
NpgA-1421373_65_0-1	-8.115	0	0	1109.33
NpgA-1029712_80_8-9	-8.114	5.19	7.295	1111.21
NpgA-144598_75_4-7	-8.113	2.788	4.478	1113.09
NpgA-66898_62_2-4	-8.111	4.538	6.259	1116.85
NpgA-150915_41_6-3	-8.111	1.725	2.939	1116.85
NpgA-625115_55_1-2	-8.111	0.04762	1.52	1116.85
NpgA-74050_98_9-8	-8.111	4.068	9.638	1116.85
NpgA-51264_14_3-2	-8.111	0.2361	3.432	1116.85
NpgA-1350653_20_1-7	-8.11	2.383	3.072	1118.74
NpgA-1703793_34_3-6	-8.105	3.835	11.72	1128.23
NpgA-152459_95_5-8	-8.104	3.033	11.46	1130.14
NpgA-198821_22_6-1	-8.102	0	0	1133.97
NpgA-1354690_24_6-2	-8.102	2.529	3.622	1133.97
NpgA-869572_92_9-1	-8.101	0	0	1135.88
NpgA-1446502_11_9-3	-8.101	2.293	6.287	1135.88
NpgA-59_05_2-1	-8.1	0	0	1137.81
NpgA-106266_06_2-5	-8.1	3.931	10.54	1137.81
NpgA-486460_32_6-2	-8.099	1.506	2.385	1139.73
NpgA-25046_79_1-5	-8.099	2.107	2.309	1139.73
NpgA-109351_34_0-1	-8.096	0	0	1145.52
NpgA-66898_62_2-5	-8.095	3.748	6.149	1147.46
NpgA-516_50_7-2	-8.094	0.7282	1.041	1149.4
NpgA-1420477_60_6-6	-8.094	6.743	10.54	1149.4
NpgA-1225278_16_9-9	-8.092	2.783	11.38	1153.29
NpgA-108612_45_9-2	-8.087	2.27	4.173	1163.08
NpgA-108612_45_9-3	-8.087	2.26	4.242	1163.08
NpgA-897016_82_9-3	-8.087	2.678	12.12	1163.08
NpgA-163521_12_8-4	-8.086	1.378	2.331	1165.04
NpgA-668270_12_0-1	-8.086	0	0	1165.04
NpgA-1351636_18_4-4	-8.086	3.861	11.06	1165.04
NpgA-36505_84_7-2	-8.08	3.229	11.03	1176.91
NpgA-1703793_34_3-7	-8.08	3.502	11.45	1176.91
NpgA-1095173_27_5-2	-8.079	0.955	1.532	1178.9
NpgA-913611_97_9-5	-8.078	4.719	11.48	1180.9
NpgA-74050_98_9-9	-8.077	3.697	9.82	1182.89
NpgA-508_99_6-6	-8.076	1.689	2.274	1184.89
NpgA-14605_22_2-2	-8.076	0.9875	1.205	1184.89
NpgA-14484_47_0-1	-8.074	0	0	1188.91
NpgA-1350653_20_1-8	-8.072	2.336	3.356	1192.93
NpgA-937272_79_2-7	-8.071	4.573	8.594	1194.95
NpgA-79794_75_5-1	-8.067	0	0	1203.05
NpgA-548_73_2-2	-8.067	6.724	11.05	1203.05
NpgA-1132935_63_7-3	-8.066	1.692	2.512	1205.09
NpgA-1226781_44_7-2	-8.065	1.512	1.582	1207.12
NpgA-97322_87_7-1	-8.061	0	0	1215.31
NpgA-26844_12_2-1	-8.061	0	0	1215.31
NpgA-1609392_27_9-1	-8.06	0	0	1217.37
NpgA-417716_92_8-1	-8.06	0	0	1217.37
NpgA-841301_32_4-3	-8.06	1.858	3.611	1217.37
NpgA-57808_66_9-1	-8.059	0	0	1219.42
NpgA-139481_59_7-1	-8.059	0	0	1219.42
NpgA-115_33_3-1	-8.057	0	0	1223.55
NpgA-870964_67_3-1	-8.057	0	0	1223.55
NpgA-516_50_7-3	-8.057	3.974	10.99	1223.55
NpgA-59_05_2-2	-8.055	1.833	2.913	1227.69
NpgA-726169_73_9-5	-8.054	1.563	2.331	1229.77
NpgA-29094_61_9-3	-8.054	3.639	5.612	1229.77
NpgA-10238_21_8-9	-8.054	9.741	13.02	1229.77
NpgA-1051375_16_6-6	-8.054	9.025	10.93	1229.77
NpgA-1095173_27_5-3	-8.053	2.524	2.824	1231.85
NpgA-841301_32_4-4	-8.051	2.54	4.63	1236.02
NpgA-1051375_16_6-7	-8.05	9.46	11.3	1238.11
NpgA-1206161_97_8-1	-8.049	0	0	1240.2
NpgA-1655504_04_3-3	-8.049	2.105	10.45	1240.2
NpgA-1354690_24_6-3	-8.047	2.867	3.957	1244.4
NpgA-548_73_2-3	-8.047	2.988	4.459	1244.4
NpgA-59_05_2-3	-8.045	7.043	10.93	1248.61
NpgA-51264_14_3-3	-8.043	2.038	2.182	1252.84
NpgA-937272_79_2-8	-8.04	1.798	2.139	1259.21
NpgA-150915_41_6-4	-8.038	3.704	10.79	1263.47
NpgA-34161_24_5-2	-8.036	2.606	6.764	1267.75
NpgA-302962_49_8-4	-8.034	1.791	2.621	1272.04
NpgA-937272_79_2-9	-8.032	2.311	4.923	1276.34
NpgA-1211441_98_3-1	-8.032	0	0	1276.34
NpgA-66898_62_2-6	-8.027	4.675	7.082	1287.17
NpgA-552_66_9-1	-8.026	0	0	1289.35
NpgA-599_79_1-4	-8.023	9.49	12.23	1295.9
NpgA-167933_07_5-5	-8.022	1.425	1.722	1298.09
NpgA-1308672_74_3-1	-8.021	0	0	1300.29
NpgA-302962_49_8-5	-8.02	4.366	5.411	1302.49
NpgA-936563_96_1-5	-8.019	1.871	2.746	1304.69
NpgA-133033_93_9-1	-8.018	0	0	1306.9
NpgA-129722_12_9-1	-8.015	0	0	1313.54
NpgA-2203_97_6-1	-8.009	0	0	1326.92
NpgA-125_10_0-1	-8.007	0	0	1331.41
NpgA-497833_27_9-1	-8.004	0	0	1338.18
NpgA-150915_41_6-5	-8.004	3.73	10.51	1338.18
NpgA-1177_87_3-1	-8.004	0	0	1338.18
NpgA-841301_32_4-5	-8.004	1.662	2.934	1338.18
NpgA-1655504_04_3-4	-8.002	1.744	1.95	1342.71
NpgA-146939_27_7-2	-8.001	2.546	3.725	1344.98
NpgA-1985605_59_1-2	-8	4.034	6.549	1347.26
NpgA-106516_24_9-2	-8	5.523	8.45	1347.26
NpgA-439081_18_2-1	-7.999	0	0	1349.53
NpgA-1095173_27_5-4	-7.999	3.253	10.83	1349.53
NpgA-516_50_7-4	-7.997	2.043	2.279	1354.1
NpgA-106266_06_2-6	-7.996	3.725	10.21	1356.39
NpgA-897016_82_9-4	-7.993	1.28	1.818	1363.29
NpgA-66898_62_2-7	-7.993	3.691	6.091	1363.29
NpgA-1354690_24_6-4	-7.992	3.072	4.069	1365.59
NpgA-67_73_2-1	-7.99	0	0	1370.21
NpgA-1420477_60_6-7	-7.987	6.35	10.45	1377.18
NpgA-1132935_63_7-4	-7.986	5.313	9.436	1379.51
NpgA-27848_84_6-1	-7.986	0	0	1379.51
NpgA-106266_06_2-7	-7.985	1.587	1.883	1381.84
NpgA-486460_32_6-3	-7.983	1.466	1.868	1386.52
NpgA-51264_14_3-4	-7.982	1.627	3.686	1388.86
NpgA-29094_61_9-4	-7.98	3.516	5.436	1393.56
NpgA-897016_82_9-5	-7.979	1.97	11.82	1395.92
NpgA-1297538_32_9-1	-7.977	0	0	1400.64
NpgA-2062_84_2-1	-7.975	0	0	1405.39
NpgA-518048_05_0-4	-7.974	2.881	3.799	1407.76
NpgA-497833_27_9-2	-7.974	0.7996	1.279	1407.76
NpgA-34552_84_6-2	-7.974	1.234	1.323	1407.76
NpgA-1354690_24_6-5	-7.974	8.891	10.75	1407.76
NpgA-59_05_2-4	-7.973	5.314	11.22	1410.14
NpgA-146939_27_7-3	-7.972	2.495	3.355	1412.53
NpgA-2921_57_5-3	-7.972	5.965	9.424	1412.53
NpgA-133099_04_4-4	-7.971	1.702	4.406	1414.92
NpgA-319460_85_0-2	-7.971	6.326	9.646	1414.92
NpgA-726169_73_9-6	-7.97	4.273	5.664	1417.31
NpgA-1420477_60_6-8	-7.969	5.605	9.793	1419.71
NpgA-516_35_8-4	-7.968	2.083	3.831	1422.11
NpgA-2920_86_7-1	-7.968	0	0	1422.11
NpgA-330942_05_7-1	-7.967	0	0	1424.51
NpgA-163521_12_8-5	-7.966	4.17	7.118	1426.92
NpgA-66898_62_2-8	-7.965	6.354	9.512	1429.33
NpgA-26844_12_2-2	-7.965	3.585	10.71	1429.33
NpgA-25046_79_1-6	-7.964	2.316	12.03	1431.75
NpgA-1420477_60_6-9	-7.964	6.924	11.05	1431.75
NpgA-81_23_2-1	-7.964	0	0	1431.75
NpgA-59_05_2-5	-7.964	6.966	10.94	1431.75
NpgA-1308672_74_3-2	-7.963	3.881	11.36	1434.17
NpgA-1297538_32_9-2	-7.962	4.907	8.556	1436.6
NpgA-1446502_11_9-4	-7.962	3.904	8.207	1436.6
NpgA-144598_75_4-8	-7.961	2.595	3.424	1439.03
NpgA-625115_55_1-3	-7.96	1.966	2.391	1441.46
NpgA-10457_90_6-1	-7.96	0	0	1441.46
NpgA-417716_92_8-2	-7.96	1.981	3.845	1441.46
NpgA-608141_41_9-2	-7.959	1.991	4.72	1443.9
NpgA-548_73_2-4	-7.959	2.384	6.968	1443.9
NpgA-133033_93_9-2	-7.958	2.642	3.719	1446.34
NpgA-2920_86_7-2	-7.956	2.242	3.85	1451.24
NpgA-66898_62_2-9	-7.956	5.869	8.447	1451.24
NpgA-1112968_42_9-1	-7.956	0	0	1451.24
NpgA-25046_79_1-7	-7.956	3.871	5.464	1451.24
NpgA-29094_61_9-5	-7.954	4.387	8.923	1456.15
NpgA-146464_95_1-2	-7.954	1.597	2.641	1456.15
NpgA-1132935_63_7-5	-7.954	3.213	9.088	1456.15
NpgA-942195_55_3-1	-7.951	0	0	1463.55
NpgA-319460_85_0-3	-7.95	1.978	2.574	1466.02
NpgA-167933_07_5-6	-7.949	5.38	9.997	1468.5
NpgA-1350653_20_1-9	-7.947	1.812	4.448	1473.47
NpgA-106266_06_2-8	-7.947	2.908	4.657	1473.47
NpgA-1354690_24_6-6	-7.947	3.709	5.183	1473.47
NpgA-129722_12_9-2	-7.945	2.158	2.796	1478.46
NpgA-150915_41_6-6	-7.942	2.05	3.311	1485.97
NpgA-115_33_3-2	-7.941	2.999	5.879	1488.49
NpgA-1132935_63_7-6	-7.941	3.184	8.973	1488.49
NpgA-147403_03_0-2	-7.941	1.303	2.967	1488.49
NpgA-486460_32_6-4	-7.941	1.693	2.309	1488.49
NpgA-552_66_9-2	-7.94	5.562	9.399	1491.01
NpgA-1260075_17_9-4	-7.939	2.836	10.96	1493.53
NpgA-503612_47_3-2	-7.938	2.78	5.739	1496.05
NpgA-913611_97_9-6	-7.938	1.86	2.681	1496.05
NpgA-486460_32_6-5	-7.937	10.34	12.14	1498.58
NpgA-167933_07_5-7	-7.934	4.78	9.045	1506.2
NpgA-163521_12_8-6	-7.934	1.862	4.963	1506.2
NpgA-152_72_7-1	-7.933	0	0	1508.75
NpgA-1354690_24_6-7	-7.933	5.29	10.01	1508.75
NpgA-2921_57_5-4	-7.931	2.048	3.125	1513.85
NpgA-111974_69_7-1	-7.931	0	0	1513.85
NpgA-841301_32_4-6	-7.93	4.47	8.456	1516.41
NpgA-1290543_63_3-1	-7.93	0	0	1516.41
NpgA-51264_14_3-5	-7.928	4.919	7.592	1521.55
NpgA-146939_27_7-4	-7.926	2.655	4.085	1526.7
NpgA-146464_95_1-3	-7.925	1.237	2.129	1529.28
NpgA-426_13_1-1	-7.92	0	0	1542.25
NpgA-34161_24_5-3	-7.919	2.94	3.8	1544.86
NpgA-1616493_44_7-2	-7.918	3.55	5.308	1547.47
NpgA-25046_79_1-8	-7.915	3.329	4.669	1555.34
NpgA-97322_87_7-2	-7.915	5.175	8.219	1555.34
NpgA-38647_11_9-1	-7.914	0	0	1557.97
NpgA-516_35_8-5	-7.913	4.813	11.29	1560.6
NpgA-26844_12_2-3	-7.911	2.361	9.997	1565.89
NpgA-51264_14_3-6	-7.911	4.931	7.72	1565.89
NpgA-497833_27_9-3	-7.909	3.246	11.7	1571.19
NpgA-146464_95_1-4	-7.908	7.012	11.78	1573.84
NpgA-59_05_2-6	-7.907	1.992	3.113	1576.5
NpgA-516_50_7-5	-7.907	8.939	11.4	1576.5
NpgA-29094_61_9-6	-7.907	3.561	5.682	1576.5
NpgA-83366_66_9-1	-7.903	0	0	1587.2
NpgA-106266_06_2-9	-7.903	4.346	10.43	1587.2
NpgA-123447_62_1-7	-7.902	2.696	10.16	1589.88
NpgA-83366_66_9-2	-7.901	1.646	2.269	1592.57
NpgA-252017_04_2-1	-7.899	0	0	1597.96
NpgA-94497_51_5-1	-7.898	0	0	1600.66
NpgA-879085_55_9-2	-7.896	1.913	2.958	1606.08
NpgA-59_05_2-7	-7.896	1.898	3.401	1606.08
NpgA-869572_92_9-2	-7.895	4.761	8.565	1608.8
NpgA-319460_85_0-4	-7.895	7.17	9.676	1608.8
NpgA-664338_39_0-1	-7.895	0	0	1608.8
NpgA-187235_37_6-1	-7.893	0	0	1614.24
NpgA-1308672_74_3-3	-7.893	2.288	2.859	1614.24
NpgA-1260075_17_9-5	-7.893	2.797	10.91	1614.24
NpgA-302962_49_8-6	-7.893	3.425	12.1	1614.24
NpgA-1446502_11_9-5	-7.89	1.676	2.273	1622.45
NpgA-1985605_59_1-3	-7.889	3.828	7.19	1625.19
NpgA-1290543_63_3-2	-7.889	5.044	9.753	1625.19
NpgA-59_05_2-8	-7.889	7.566	10.25	1625.19
NpgA-1095173_27_5-5	-7.885	3.255	5.966	1636.21
NpgA-1051375_16_6-8	-7.885	3.56	8.281	1636.21
NpgA-146464_95_1-5	-7.884	6.9	11.21	1638.98
NpgA-1393477_72_9-3	-7.884	3.934	5.937	1638.98
NpgA-2921_57_5-5	-7.881	8.454	11	1647.31
NpgA-83_44_3-1	-7.879	0	0	1652.88
NpgA-87760_53_0-2	-7.878	2.668	4.495	1655.68
NpgA-1393477_72_9-4	-7.876	5.274	7.053	1661.28
NpgA-1809336_39_7-2	-7.874	3.471	5.223	1666.91
NpgA-115_33_3-3	-7.873	2.829	7.578	1669.73
NpgA-1143532_39_1-2	-7.866	3.9	8.635	1689.59
NpgA-14605_22_2-3	-7.864	2.132	2.325	1695.31
NpgA-1260075_17_9-6	-7.864	6.278	8.976	1695.31
NpgA-27848_84_6-2	-7.864	1.127	1.328	1695.31
NpgA-223673_61_8-1	-7.863	0	0	1698.18
NpgA-1703793_34_3-8	-7.863	3.815	11.49	1698.18
NpgA-123447_62_1-8	-7.858	2.635	9.88	1712.59
NpgA-26844_12_2-4	-7.857	3.856	6.499	1715.48
NpgA-552_66_9-3	-7.857	1.304	2.199	1715.48
NpgA-25046_79_1-9	-7.857	4.389	7.755	1715.48
NpgA-1132935_63_7-7	-7.856	3.779	9.158	1718.38
NpgA-95635_55_5-1	-7.855	0	0	1721.29
NpgA-503612_47_3-3	-7.855	3.517	5.211	1721.29
NpgA-508_99_6-7	-7.853	2.326	9.233	1727.12
NpgA-599_79_1-5	-7.851	7.3	9.457	1732.96
NpgA-147403_03_0-3	-7.851	2.153	7.209	1732.96
NpgA-146939_27_7-5	-7.85	9.395	12.15	1735.89
NpgA-57808_66_9-2	-7.85	4.197	10.7	1735.89
NpgA-1112968_42_9-2	-7.849	2.584	9.727	1738.83
NpgA-869572_92_9-3	-7.848	4.642	8.782	1741.77
NpgA-913611_97_9-7	-7.848	2.831	3.658	1741.77
NpgA-1393477_72_9-5	-7.847	5.314	6.883	1744.71
NpgA-31430_15_6-1	-7.846	0	0	1747.66
NpgA-22888_70_6-5	-7.844	5.162	8.649	1753.58
NpgA-1655504_04_3-5	-7.843	1.972	2.384	1756.55
NpgA-108612_45_9-4	-7.842	4.545	8.151	1759.52
NpgA-856867_55_5-3	-7.842	8.143	12.12	1759.52
NpgA-853_23_6-1	-7.841	0	0	1762.49
NpgA-87760_53_0-3	-7.84	2.5	4.15	1765.47
NpgA-760937_92_6-1	-7.84	0	0	1765.47
NpgA-67392_87_4-1	-7.84	0	0	1765.47
NpgA-1354690_24_6-8	-7.838	2.318	2.824	1771.45
NpgA-22888_70_6-6	-7.835	2.535	3.842	1780.45
NpgA-913611_97_9-8	-7.835	2.628	3.369	1780.45
NpgA-1454846_35_5-1	-7.834	0	0	1783.46
NpgA-870964_67_3-2	-7.834	8.129	10.71	1783.46
NpgA-95635_55_5-2	-7.834	1.233	2.6	1783.46
NpgA-668270_12_0-2	-7.833	2.11	8.39	1786.48
NpgA-106516_24_9-3	-7.833	3.466	4.437	1786.48
NpgA-1393477_72_9-6	-7.833	2.535	3.859	1786.48
NpgA-548_73_2-5	-7.833	6.334	11.43	1786.48
NpgA-518048_05_0-5	-7.832	2.623	4.067	1789.5
NpgA-461432_26_8-1	-7.831	0	0	1792.53
NpgA-923287_50_7-1	-7.83	0	0	1795.56
NpgA-518048_05_0-6	-7.828	4.089	8.489	1801.64
NpgA-548_73_2-6	-7.827	3.952	9.271	1804.68
NpgA-50_03_3-1	-7.827	0	0	1804.68
NpgA-67392_87_4-2	-7.826	4.156	6.007	1807.73
NpgA-198821_22_6-2	-7.825	4.308	6.806	1810.79
NpgA-1393477_72_9-7	-7.825	4.484	7.868	1810.79
NpgA-150915_41_6-7	-7.824	3.622	10.78	1813.85
NpgA-147403_03_0-4	-7.824	2.138	7.838	1813.85
NpgA-59_05_2-9	-7.824	6.417	11.24	1813.85
NpgA-3313_26_6-1	-7.824	0	0	1813.85
NpgA-1308672_74_3-4	-7.824	3.399	11.69	1813.85
NpgA-302962_49_8-7	-7.824	3.277	12.12	1813.85
NpgA-1703793_34_3-9	-7.823	4.379	12.22	1816.92
NpgA-548_73_2-7	-7.822	7.686	11.76	1819.99
NpgA-1637781_04_4-4	-7.821	3.975	10.42	1823.07
NpgA-59198_70_8-1	-7.821	0	0	1823.07
NpgA-112887_68_0-1	-7.82	0	0	1826.15
NpgA-95635_55_5-3	-7.818	2.178	3.552	1832.34
NpgA-1051375_10_0-8	-7.817	1.695	3.022	1835.43
NpgA-853_23_6-2	-7.812	1.938	3.244	1851.01
NpgA-252017_04_2-2	-7.811	2.755	3.556	1854.14
NpgA-2101700_15_4-1	-7.811	0	0	1854.14
NpgA-808118_40_3-1	-7.81	0	0	1857.27
NpgA-129_03_3-1	-7.809	0	0	1860.41
NpgA-366789_02_8-1	-7.809	0	0	1860.41
NpgA-1393477_72_9-8	-7.808	2.684	3.795	1863.56
NpgA-33564_31_7-1	-7.808	0	0	1863.56
NpgA-198821_22_6-3	-7.808	4.061	6.86	1863.56
NpgA-25122_46_7-1	-7.807	0	0	1866.71
NpgA-599_79_1-6	-7.807	1.486	2.093	1866.71
NpgA-638_94_8-1	-7.807	0	0	1866.71
NpgA-83366_66_9-3	-7.807	3.785	6.215	1866.71
NpgA-108612_45_9-5	-7.806	2.053	2.67	1869.87
NpgA-1132935_63_7-8	-7.806	3.826	9.305	1869.87
NpgA-1051375_16_6-9	-7.805	7.822	10.6	1873.03
NpgA-841301_32_4-7	-7.8	4.633	7.906	1888.92
NpgA-2062_84_2-2	-7.799	7.493	10.1	1892.12
NpgA-171596_29_5-3	-7.798	2.068	5.343	1895.32
NpgA-1306760_87_1-1	-7.797	0	0	1898.52
NpgA-552_66_9-4	-7.796	2.124	9.611	1901.73
NpgA-2101700_15_4-2	-7.795	2.852	10.35	1904.95
NpgA-133099_04_4-5	-7.791	4.035	6.608	1917.87
NpgA-202189_78_4-5	-7.791	2.729	11.34	1917.87
NpgA-2062_84_2-3	-7.791	2.354	6.691	1917.87
NpgA-976_71_6-1	-7.79	0	0	1921.11
NpgA-1260075_17_9-7	-7.79	1.859	2.756	1921.11
NpgA-1616493_44_7-3	-7.79	3.997	11.22	1921.11
NpgA-87760_53_0-4	-7.789	6.264	11.98	1924.36
NpgA-1112968_42_9-3	-7.788	7.377	9.789	1927.61
NpgA-19794_93_5-1	-7.788	0	0	1927.61
NpgA-486460_32_6-6	-7.787	1.807	2.395	1930.87
NpgA-726169_73_9-7	-7.785	1.348	1.844	1937.41
NpgA-107724_20_9-1	-7.781	0	0	1950.55
NpgA-2101700_15_4-3	-7.781	2.294	10.47	1950.55
NpgA-936563_96_1-6	-7.78	2.749	3.854	1953.85
NpgA-1306760_87_1-2	-7.78	6.515	9.763	1953.85
NpgA-108612_45_9-6	-7.78	2.904	4.702	1953.85
NpgA-726169_73_9-8	-7.777	3.069	11.99	1963.77
NpgA-53_36_1-1	-7.777	0	0	1963.77
NpgA-879085_55_9-3	-7.776	7.033	9.068	1967.1
NpgA-2062_84_2-4	-7.776	3.644	8.531	1967.1
NpgA-1290543_63_3-3	-7.775	3.129	5.121	1970.42
NpgA-202189_78_4-6	-7.774	2.742	4.197	1973.75
NpgA-936563_87_0-4	-7.772	6.724	10.44	1980.44
NpgA-133099_04_4-6	-7.772	8.506	11.54	1980.44
NpgA-133454_47_4-1	-7.772	0	0	1980.44
NpgA-144598_75_4-9	-7.771	3.552	10.27	1983.78
NpgA-319460_85_0-5	-7.77	1.745	2.084	1987.14
NpgA-1217486_61_7-2	-7.77	8.797	10.65	1987.14
NpgA-95635_55_5-4	-7.769	1.026	1.922	1990.5
NpgA-1132935_63_7-9	-7.767	4.459	9.354	1997.24
NpgA-97322_87_7-3	-7.767	1.151	1.42	1997.24
NpgA-189279_58_1-1	-7.764	0	0	2007.39
NpgA-936563_96_1-7	-7.762	3.28	5.349	2014.18
NpgA-548_73_2-8	-7.761	4.092	8.479	2017.59
NpgA-1256580_46_7-2	-7.761	3.625	11.06	2017.59
NpgA-87760_53_0-5	-7.759	2.681	4.08	2024.42
NpgA-1351636_18_4-5	-7.759	7.87	10.53	2024.42
NpgA-1632006_28_0-1	-7.758	0	0	2027.84
NpgA-3313_26_6-2	-7.756	1.095	1.277	2034.71
NpgA-123447_62_1-9	-7.755	2.87	10.11	2038.15
NpgA-516_50_7-6	-7.754	7.147	10.47	2041.59
NpgA-608141_41_9-3	-7.754	1.981	4.995	2041.59
NpgA-127_31_1-1	-7.753	0	0	2045.05
NpgA-51333_22_3-1	-7.753	0	0	2045.05
NpgA-552_66_9-5	-7.752	1.984	9.722	2048.51
NpgA-109351_33_9-1	-7.751	0	0	2051.97
NpgA-163521_12_8-7	-7.75	4.463	9.829	2055.44
NpgA-146939_27_7-6	-7.748	1.654	2.123	2062.4
NpgA-167933_07_5-8	-7.747	5.84	10.06	2065.89
NpgA-81840_15_5-1	-7.747	0	0	2065.89
NpgA-516_50_7-7	-7.747	4.604	10.51	2065.89
NpgA-1112968_42_9-4	-7.746	7.658	10.5	2069.38
NpgA-150915_41_6-8	-7.744	1.596	2.189	2076.38
NpgA-106516_24_9-4	-7.743	3.879	8.655	2079.9
NpgA-1655504_04_3-6	-7.743	7.542	10.12	2079.9
NpgA-146464_95_1-6	-7.743	7.499	12.16	2079.9
NpgA-146939_27_7-7	-7.743	4.762	10.43	2079.9
NpgA-1446502_11_9-6	-7.743	1.76	2.197	2079.9
NpgA-36505_84_7-3	-7.743	3.181	10.74	2079.9
NpgA-444731_52_6-1	-7.742	0	0	2083.41
NpgA-69004_03_1-2	-7.742	2.116	2.607	2083.41
NpgA-870964_67_3-3	-7.741	6.008	8.127	2086.94
NpgA-976_71_6-2	-7.741	4.662	6.441	2086.94
NpgA-1108_68_5-1	-7.74	0	0	2090.47
NpgA-1108_68_5-2	-7.737	2.471	8.229	2101.09
NpgA-1985605_59_1-4	-7.737	3.046	5.084	2101.09
NpgA-57808_66_9-3	-7.736	3.901	10.4	2104.64
NpgA-29094_61_9-7	-7.735	2.932	11.24	2108.2
NpgA-81_23_2-2	-7.734	1.54	1.856	2111.77
NpgA-312753_06_3-1	-7.733	0	0	2115.34
NpgA-163521_12_8-8	-7.733	4.227	7.222	2115.34
NpgA-34161_24_5-4	-7.731	3.129	7.134	2122.5
NpgA-1446502_11_9-7	-7.73	4.21	8.275	2126.09
NpgA-923287_50_7-2	-7.73	2.162	2.592	2126.09
NpgA-356068_94_5-1	-7.73	0	0	2126.09
NpgA-76_25_5-1	-7.728	0	0	2133.28
NpgA-1985605_59_1-5	-7.727	2.773	5.294	2136.89
NpgA-107724_20_9-2	-7.727	2.125	6.831	2136.89
NpgA-942195_55_3-2	-7.726	1.599	4.076	2140.51
NpgA-841301_32_4-8	-7.726	4.901	8.43	2140.51
NpgA-739366_20_2-1	-7.726	0	0	2140.51
NpgA-497833_27_9-4	-7.725	4.318	12.25	2144.13
NpgA-356068_94_5-2	-7.725	2.211	3.534	2144.13
NpgA-116649_85_5-1	-7.725	0	0	2144.13
NpgA-1194506_26_7-1	-7.723	0	0	2151.38
NpgA-1655504_04_3-7	-7.722	2.728	3.358	2155.02
NpgA-106516_24_9-5	-7.722	3.2	4.936	2155.02
NpgA-56_47_3-1	-7.722	0	0	2155.02
NpgA-2557_49_5-1	-7.722	0	0	2155.02
NpgA-856866_72_3-1	-7.718	0	0	2169.64
NpgA-313368_91_1-1	-7.717	0	0	2173.31
NpgA-69004_03_1-3	-7.717	1.568	2.062	2173.31
NpgA-1226781_44_7-3	-7.717	2.31	2.782	2173.31
NpgA-252017_04_2-3	-7.715	8.981	10.43	2180.66
NpgA-841301_32_4-9	-7.715	4.505	8.071	2180.66
NpgA-133099_04_4-7	-7.715	5.694	8.745	2180.66
NpgA-97322_87_7-4	-7.714	2.241	3.51	2184.35
NpgA-108612_45_9-7	-7.713	4.177	7.563	2188.04
NpgA-147511_69_1-1	-7.713	0	0	2188.04
NpgA-1207456_01_6-1	-7.711	0	0	2195.45
NpgA-10457_90_6-2	-7.71	1.216	1.596	2199.16
NpgA-330784_47_9-1	-7.71	0	0	2199.16
NpgA-625115_55_1-4	-7.709	1.573	2.523	2202.88
NpgA-1260075_17_9-8	-7.709	2.342	2.702	2202.88
NpgA-1206161_97_8-2	-7.707	3.25	4.787	2210.34
NpgA-548_73_2-9	-7.707	4.701	9.168	2210.34
NpgA-936563_96_1-8	-7.706	1.814	2.155	2214.08
NpgA-2062_84_2-5	-7.706	3.851	8.095	2214.08
NpgA-330784_47_9-2	-7.706	2.752	7.402	2214.08
NpgA-870964_67_3-4	-7.705	12.55	14.07	2217.82
NpgA-133454_47_4-2	-7.705	4.244	11.47	2217.82
NpgA-134418_28_3-1	-7.704	0	0	2221.57
NpgA-133033_93_9-3	-7.704	3.235	4.697	2221.57
NpgA-133099_04_4-8	-7.704	7.003	10.59	2221.57
NpgA-3093_35_4-1	-7.703	0	0	2225.33
NpgA-1393477_72_9-9	-7.699	2.387	4.4	2240.42
NpgA-2920_86_7-3	-7.697	5.39	8.346	2248
NpgA-146464_95_1-7	-7.697	4.215	5.337	2248
NpgA-1802220_02_5-1	-7.696	0	0	2251.81
NpgA-129722_12_9-3	-7.695	4.5	11.19	2255.61
NpgA-1297538_32_9-3	-7.695	4.907	8.248	2255.61
NpgA-870964_67_3-5	-7.694	7.919	10.11	2259.43
NpgA-81098_60_4-1	-7.693	0	0	2263.25
NpgA-108612_45_9-8	-7.693	1.795	2.458	2263.25
NpgA-330784_47_9-3	-7.692	2.11	7.287	2267.08
NpgA-115956_12_2-1	-7.691	0	0	2270.91
NpgA-133099_04_4-9	-7.691	6.187	11.13	2270.91
NpgA-808118_40_3-2	-7.691	1.207	2.244	2270.91
NpgA-163521_12_8-9	-7.689	3.297	6.187	2278.6
NpgA-2101700_15_4-4	-7.689	1.482	2.582	2278.6
NpgA-923287_50_7-3	-7.689	6.805	9.59	2278.6
NpgA-2101700_15_4-5	-7.688	2.22	10.14	2282.45
NpgA-1297538_32_9-4	-7.688	4.761	7.892	2282.45
NpgA-81098_60_4-2	-7.687	2.4	3.844	2286.31
NpgA-51333_22_3-2	-7.686	1.995	7.86	2290.18
NpgA-1217486_61_7-3	-7.686	8.458	11.42	2290.18
NpgA-223673_61_8-2	-7.683	5.093	6.423	2301.82
NpgA-1211441_98_3-2	-7.682	3.799	11.58	2305.71
NpgA-330784_47_9-4	-7.682	2.501	7.287	2305.71
NpgA-68302_57_8-1	-7.682	0	0	2305.71
NpgA-83_49_8-1	-7.681	0	0	2309.61
NpgA-1112968_42_9-5	-7.68	7.916	9.921	2313.51
NpgA-51264_14_3-7	-7.68	3.646	6.392	2313.51
NpgA-508_99_6-8	-7.679	2.396	10.45	2317.43
NpgA-152459_95_5-9	-7.677	3.133	11.28	2325.27
NpgA-486460_32_6-7	-7.677	6.509	10.08	2325.27
NpgA-67_73_2-2	-7.677	2.239	7.11	2325.27
NpgA-552_66_9-6	-7.677	6.427	9.979	2325.27
NpgA-1290543_63_3-4	-7.676	5.08	9.815	2329.2
NpgA-913611_97_9-9	-7.676	5.031	11.81	2329.2
NpgA-366789_02_8-2	-7.676	1.129	1.18	2329.2
NpgA-1177_87_3-2	-7.676	2.421	3.622	2329.2
NpgA-202189_78_4-7	-7.675	1.725	2.908	2333.14
NpgA-129722_12_9-4	-7.675	4.617	11.61	2333.14
NpgA-129722_12_9-5	-7.675	4.705	11.3	2333.14
NpgA-133454_47_4-3	-7.673	1.19	2.113	2341.04
NpgA-129722_12_9-6	-7.671	1.432	2.055	2348.96
NpgA-518048_05_0-7	-7.671	3.456	8.942	2348.96
NpgA-1421373_65_0-2	-7.671	2.549	4.036	2348.96
NpgA-146464_95_1-8	-7.67	5.584	7.629	2352.94
NpgA-1206161_97_8-3	-7.67	4.951	6.328	2352.94
NpgA-936563_96_1-9	-7.669	4.885	10.9	2356.92
NpgA-942195_55_3-3	-7.668	3.286	6.807	2360.9
NpgA-486460_32_6-8	-7.668	8.615	11.07	2360.9
NpgA-129722_12_9-7	-7.667	4.718	11.39	2364.89
NpgA-856867_55_5-4	-7.666	7.367	11.39	2368.89
NpgA-201530_41_8-1	-7.666	0	0	2368.89
NpgA-1446502_11_9-8	-7.666	4.909	6.649	2368.89
NpgA-842133_18_0-2	-7.666	5.379	9.539	2368.89
NpgA-1297538_32_9-5	-7.664	3.736	10.67	2376.91
NpgA-366789_02_8-3	-7.664	6.834	8.949	2376.91
NpgA-1985605_59_1-6	-7.664	3.682	6.05	2376.91
NpgA-870964_67_3-6	-7.664	6.94	9.096	2376.91
NpgA-808118_40_3-3	-7.663	5.329	7.966	2380.93
NpgA-330784_47_9-5	-7.661	4.167	9.225	2388.99
NpgA-1809336_39_7-3	-7.66	2.508	3.336	2393.03
NpgA-129722_12_9-8	-7.66	4.873	11.21	2393.03
NpgA-1297538_32_9-6	-7.66	4.806	9.608	2393.03
NpgA-138402_11_6-1	-7.659	0	0	2397.08
NpgA-1297538_32_9-7	-7.659	4.591	8.949	2397.08
NpgA-2921_57_5-6	-7.658	4.84	8.125	2401.13
NpgA-3313_26_6-3	-7.658	1.145	1.379	2401.13
NpgA-19216_56_9-1	-7.658	0	0	2401.13
NpgA-1226781_44_7-4	-7.657	1.218	2.022	2405.19
NpgA-3313_26_6-4	-7.657	3.476	7.357	2405.19
NpgA-503612_47_3-4	-7.655	3.749	9.661	2413.33
NpgA-26844_12_2-5	-7.655	4.082	10.87	2413.33
NpgA-146464_95_1-9	-7.655	6.658	8.402	2413.33
NpgA-1306760_87_1-3	-7.655	2.345	3.176	2413.33
NpgA-1421373_65_0-3	-7.653	2.412	4.268	2421.5
NpgA-29216_28_2-1	-7.653	0	0	2421.5
NpgA-57808_66_9-4	-7.652	3.503	5.712	2425.6
NpgA-33564_31_7-2	-7.652	2.092	3.331	2425.6
NpgA-319460_85_0-6	-7.651	2.209	3.21	2429.7
NpgA-1038915_60_4-1	-7.651	0	0	2429.7
NpgA-1421373_65_0-4	-7.651	1.18	1.784	2429.7
NpgA-131_69_1-1	-7.65	0	0	2433.81
NpgA-83366_66_9-4	-7.65	3.6	11.39	2433.81
NpgA-870964_67_3-7	-7.65	7.572	9.898	2433.81
NpgA-7681_14_3-1	-7.65	0	0	2433.81
NpgA-201530_41_8-2	-7.649	2.031	4.87	2437.93
NpgA-356068_94_5-3	-7.649	1.696	2.54	2437.93
NpgA-2101700_15_4-6	-7.649	1.138	1.986	2437.93
NpgA-923287_50_7-4	-7.649	6.918	9.523	2437.93
NpgA-518048_05_0-8	-7.648	2.195	3.215	2442.05
NpgA-1217486_61_7-4	-7.647	6.453	9.56	2446.18
NpgA-3385_03_3-1	-7.647	0	0	2446.18
NpgA-81098_60_4-3	-7.647	1.537	2.319	2446.18
NpgA-106516_24_9-6	-7.647	4.916	8.656	2446.18
NpgA-1616493_44_7-4	-7.646	3.947	11.68	2450.31
NpgA-1632006_28_0-2	-7.646	2.624	3.576	2450.31
NpgA-1446502_11_9-9	-7.646	3.975	7.31	2450.31
NpgA-1655504_04_3-8	-7.646	2.872	9.775	2450.31
NpgA-2920_86_7-4	-7.646	9.062	11.34	2450.31
NpgA-1308672_74_3-5	-7.646	4.087	5.355	2450.31
NpgA-3313_26_6-5	-7.645	2.242	6.365	2454.46
NpgA-1492952_76_7-3	-7.645	5.293	10.97	2454.46
NpgA-223673_61_8-3	-7.644	1.358	1.73	2458.61
NpgA-760937_92_6-2	-7.643	1.724	3.717	2462.77
NpgA-19794_93_5-2	-7.642	3.04	9.052	2466.93
NpgA-439081_18_2-2	-7.641	4.384	7.681	2471.1
NpgA-508_99_6-9	-7.64	6.801	10.11	2475.28
NpgA-95635_55_5-5	-7.639	2.054	11.28	2479.47
NpgA-147059_72_1-1	-7.637	0	0	2487.86
NpgA-2062_84_2-6	-7.637	3.643	8.311	2487.86
NpgA-201530_41_8-3	-7.635	2.271	7.52	2496.28
NpgA-134418_28_3-2	-7.634	3.402	5.114	2500.5
NpgA-942195_55_3-4	-7.633	3.657	6.508	2504.73
NpgA-115_33_3-4	-7.633	1.65	7.632	2504.73
NpgA-33564_31_7-3	-7.632	2.377	8.335	2508.97
NpgA-1308672_74_3-6	-7.631	2.354	3.21	2513.21
NpgA-95635_55_5-6	-7.63	2.281	11.26	2517.46
NpgA-26844_12_2-6	-7.63	2.793	4.414	2517.46
NpgA-1524_88_5-1	-7.63	0	0	2517.46
NpgA-897016_82_9-6	-7.628	2.325	11.93	2525.98
NpgA-808118_40_3-4	-7.627	5.447	7.815	2530.26
NpgA-856867_55_5-5	-7.626	7.675	11.56	2534.53
NpgA-497833_27_9-5	-7.625	3.232	11.77	2538.82
NpgA-651_48_9-2	-7.624	1.948	3.482	2543.11
NpgA-2062_84_2-7	-7.623	3.952	8.302	2547.41
NpgA-131_69_1-2	-7.623	7.385	9.601	2547.41
NpgA-444731_52_6-2	-7.623	5.911	11.4	2547.41
NpgA-29094_61_9-8	-7.621	3.698	6.401	2556.04
NpgA-201530_41_8-4	-7.621	2.462	5.922	2556.04
NpgA-102625_70_7-1	-7.621	0	0	2556.04
NpgA-516_35_8-6	-7.619	7.591	10.62	2564.69
NpgA-1095173_27_5-6	-7.618	3.361	9.371	2569.03
NpgA-439081_18_2-3	-7.618	1.071	1.375	2569.03
NpgA-1448169_71_8-1	-7.618	0	0	2569.03
NpgA-187235_37_6-2	-7.618	5.993	8.045	2569.03
NpgA-51264_14_3-8	-7.617	1.261	3.912	2573.37
NpgA-252017_04_2-4	-7.616	1.689	1.932	2577.72
NpgA-33564_31_7-4	-7.616	2.813	8.167	2577.72
NpgA-356068_94_5-4	-7.616	2.395	3.843	2577.72
NpgA-223673_61_8-4	-7.616	1.542	1.913	2577.72
NpgA-134418_28_3-3	-7.615	3.509	5.14	2582.08
NpgA-133454_47_4-4	-7.614	1.412	2.435	2586.45
NpgA-1207456_01_6-2	-7.612	4.84	6.552	2595.21
NpgA-2062_84_2-8	-7.611	6.14	7.953	2599.59
NpgA-1308672_74_3-7	-7.611	2.697	4.47	2599.59
NpgA-439081_18_2-4	-7.61	3.744	6.432	2603.99
NpgA-1802220_02_5-2	-7.61	3.841	5.123	2603.99
NpgA-761423_87_4-1	-7.609	0	0	2608.39
NpgA-1448169_71_8-2	-7.609	0.1057	2.053	2608.39
NpgA-1217486_61_7-5	-7.608	8.29	10.73	2612.8
NpgA-252017_04_2-5	-7.608	8.145	10.35	2612.8
NpgA-67392_87_4-3	-7.608	1.4	7.754	2612.8
NpgA-22888_70_6-7	-7.607	2.327	9.923	2617.22
NpgA-53_06_5-1	-7.607	0	0	2617.22
NpgA-106516_24_9-7	-7.607	3.958	5.02	2617.22
NpgA-97322_87_7-5	-7.605	2.079	4.549	2626.08
NpgA-869572_92_9-4	-7.605	6.561	8.974	2626.08
NpgA-1095173_27_5-7	-7.604	2.717	10.79	2630.52
NpgA-1655504_04_3-9	-7.603	2.348	10.45	2634.97
NpgA-50_04_4-2	-7.603	2.411	3.606	2634.97
NpgA-146939_27_7-8	-7.603	9.631	11.73	2634.97
NpgA-444731_52_6-3	-7.602	6.355	11.48	2639.43
NpgA-520_85_4-1	-7.602	0	0	2639.43
NpgA-2921_57_5-7	-7.6	4.545	7.889	2648.36
NpgA-503612_47_3-5	-7.6	3.113	9.381	2648.36
NpgA-518048_05_0-9	-7.6	4.635	10.23	2648.36
NpgA-330942_05_7-2	-7.598	3.891	5.569	2657.33
NpgA-116649_85_5-2	-7.597	1.816	2.318	2661.82
NpgA-1211441_98_3-3	-7.597	2.145	3.859	2661.82
NpgA-107724_20_9-3	-7.596	1.428	6.873	2666.32
NpgA-850140_72_6-1	-7.596	0	0	2666.32
NpgA-1308672_74_3-8	-7.596	3.789	11.45	2666.32
NpgA-518_28_5-1	-7.595	0	0	2670.83
NpgA-417716_92_8-3	-7.594	1.624	2.173	2675.35
NpgA-81_23_2-3	-7.594	1.695	2.714	2675.35
NpgA-552_66_9-7	-7.593	8.604	11.98	2679.87
NpgA-29094_61_9-9	-7.592	3.841	6.573	2684.41
NpgA-599_79_1-7	-7.592	6.46	9.042	2684.41
NpgA-146939_27_7-9	-7.591	4.997	10.63	2688.94
NpgA-1143532_39_1-3	-7.591	4.305	9.12	2688.94
NpgA-53164_05_9-1	-7.591	0	0	2688.94
NpgA-879085_55_9-4	-7.591	6.745	9.577	2688.94
NpgA-1095173_27_5-8	-7.591	1.9	2.648	2688.94
NpgA-7261_97_4-1	-7.59	0	0	2693.49
NpgA-1985605_59_1-7	-7.589	3.413	5.709	2698.05
NpgA-968_81_0-1	-7.589	0	0	2698.05
NpgA-1492952_76_7-4	-7.589	2.557	3.91	2698.05
NpgA-31430_15_6-2	-7.588	6.03	8.289	2702.61
NpgA-95635_55_5-7	-7.588	2.036	11.58	2702.61
NpgA-34161_24_5-5	-7.586	3.215	7.648	2711.76
NpgA-156053_89_3-1	-7.585	0	0	2716.34
NpgA-81098_60_4-4	-7.585	2.03	3.059	2716.34
NpgA-223673_61_8-5	-7.585	2.242	4.149	2716.34
NpgA-1354690_24_6-9	-7.585	4.558	9.519	2716.34
NpgA-150915_41_6-9	-7.584	3.826	10.59	2720.94
NpgA-486460_32_6-9	-7.584	8.523	10.88	2720.94
NpgA-1313725_88_0-1	-7.584	0	0	2720.94
NpgA-1095173_27_5-9	-7.584	7.022	8.911	2720.94
NpgA-1260075_17_9-9	-7.582	2.813	4.406	2730.15
NpgA-439081_18_2-5	-7.582	4.793	8.595	2730.15
NpgA-312753_06_3-2	-7.581	1.916	5.404	2734.77
NpgA-1338225_97_0-1	-7.581	0	0	2734.77
NpgA-760937_92_6-3	-7.58	5.637	7.948	2739.39
NpgA-2557_49_5-2	-7.579	4.579	6.805	2744.02
NpgA-936563_87_0-5	-7.579	5.679	10	2744.02
NpgA-87760_53_0-6	-7.578	2.539	4.044	2748.66
NpgA-2101700_15_4-7	-7.576	2.511	10.01	2757.97
NpgA-3385_03_3-2	-7.575	2.477	7.208	2762.63
NpgA-503612_47_3-6	-7.574	4.31	9.642	2767.3
NpgA-22888_70_6-8	-7.573	4.94	8.338	2771.98
NpgA-1108_68_5-3	-7.573	4.578	7.843	2771.98
NpgA-417716_92_8-4	-7.573	4.185	11.53	2771.98
NpgA-1421373_65_0-5	-7.572	2.53	5.028	2776.67
NpgA-134418_28_3-4	-7.572	4.434	5.9	2776.67
NpgA-856867_55_5-6	-7.57	1.689	2.452	2786.07
NpgA-198821_22_6-4	-7.569	4.08	6.737	2790.78
NpgA-1306760_87_1-4	-7.569	2.209	3.002	2790.78
NpgA-1492952_76_7-5	-7.568	5.551	10.45	2795.5
NpgA-497833_27_9-6	-7.567	4.335	12.23	2800.23
NpgA-1524_88_5-2	-7.566	2.435	6.914	2804.96
NpgA-842133_18_0-3	-7.566	1.847	3.24	2804.96
NpgA-668270_12_0-3	-7.565	3.314	6.597	2809.71
NpgA-869572_92_9-5	-7.564	1.535	2.17	2814.46
NpgA-69004_03_1-4	-7.564	2.057	2.623	2814.46
NpgA-72956_09_3-1	-7.563	0	0	2819.22
NpgA-319460_85_0-7	-7.562	3.164	4.03	2823.99
NpgA-761423_87_4-2	-7.562	1.243	1.573	2823.99
NpgA-608141_41_9-4	-7.562	2.474	5.273	2823.99
NpgA-870281_82_6-1	-7.562	0	0	2823.99
NpgA-81_25_4-1	-7.562	0	0	2823.99
NpgA-668270_12_0-4	-7.56	3.483	5.375	2833.55
NpgA-51264_14_3-9	-7.56	3.529	5.3	2833.55
NpgA-1226781_44_7-5	-7.56	8.453	10.52	2833.55
NpgA-366789_02_8-4	-7.558	1.549	1.907	2843.14
NpgA-138402_11_6-2	-7.557	1.429	2.804	2847.95
NpgA-106516_24_9-8	-7.557	4.377	9.678	2847.95
NpgA-81_23_2-4	-7.555	1.976	8.367	2857.59
NpgA-1211441_98_3-4	-7.554	1.763	3.206	2862.42
NpgA-83_49_8-2	-7.554	1.735	8.306	2862.42
NpgA-133033_93_9-4	-7.553	3.117	8.541	2867.26
NpgA-147511_69_1-2	-7.553	0.8287	1.483	2867.26
NpgA-2101700_15_4-8	-7.552	2.542	10.02	2872.11
NpgA-761423_87_4-3	-7.549	3.457	4.243	2886.7
NpgA-761423_87_4-4	-7.549	6.167	8.871	2886.7
NpgA-14484_47_0-2	-7.549	2.221	8.272	2886.7
NpgA-202189_78_4-8	-7.549	2.231	3.748	2886.7
NpgA-116649_85_5-3	-7.548	4.204	8.637	2891.59
NpgA-319460_85_0-8	-7.548	1.923	2.882	2891.59
NpgA-252017_04_2-6	-7.548	1.596	1.979	2891.59
NpgA-202189_78_4-9	-7.545	2.21	3.751	2906.28
NpgA-664338_39_0-2	-7.545	3.115	8.814	2906.28
NpgA-1112968_42_9-6	-7.541	2.498	9.601	2925.99
NpgA-668270_12_0-5	-7.541	4.23	7.607	2925.99
NpgA-14605_22_2-4	-7.541	2.28	2.71	2925.99
NpgA-497833_27_9-7	-7.539	4.23	10.96	2935.89
NpgA-67_73_2-3	-7.539	2.058	7.501	2935.89
NpgA-198821_22_6-5	-7.539	2.35	2.994	2935.89
NpgA-638_94_8-2	-7.539	2.109	7.161	2935.89
NpgA-31431_39_7-1	-7.538	0	0	2940.86
NpgA-1290543_63_3-5	-7.537	4.502	9.267	2945.83
NpgA-21187_98_4-1	-7.537	0	0	2945.83
NpgA-319460_85_0-9	-7.536	2.865	4.093	2950.81
NpgA-150322_43_3-1	-7.536	0	0	2950.81
NpgA-87760_53_0-7	-7.535	1.719	2.596	2955.8
NpgA-842133_18_0-4	-7.534	5.603	9.577	2960.8
NpgA-128794_94_5-1	-7.532	0	0	2970.83
NpgA-936563_87_0-6	-7.531	3.103	5.766	2975.85
NpgA-169590_42_5-1	-7.531	0	0	2975.85
NpgA-201530_41_8-5	-7.531	2.022	2.779	2975.85
NpgA-108612_45_9-9	-7.531	4.79	8.41	2975.85
NpgA-95635_55_5-8	-7.531	2.273	11.3	2975.85
NpgA-167933_07_5-9	-7.527	5.28	9.908	2996.03
NpgA-171596_29_5-4	-7.527	2.924	6.297	2996.03
NpgA-1446261_44_4-1	-7.527	0	0	2996.03
NpgA-68_96_2-1	-7.527	0	0	2996.03
NpgA-625115_55_1-5	-7.527	4.763	8.124	2996.03
NpgA-112887_68_0-2	-7.527	5.917	12	2996.03
NpgA-856866_72_3-2	-7.526	1.593	2.11	3001.1
NpgA-139481_59_7-2	-7.523	2.352	7.175	3016.35
NpgA-116649_85_5-4	-7.522	1.918	2.506	3021.45
NpgA-112887_68_0-3	-7.522	7.077	12.14	3021.45
NpgA-923287_50_7-5	-7.522	1.579	2.405	3021.45
NpgA-856866_72_3-3	-7.522	4.775	10.3	3021.45
NpgA-378_44_9-1	-7.52	0	0	3031.68
NpgA-87760_53_0-8	-7.52	2.715	5.128	3031.68
NpgA-189279_58_1-2	-7.519	2.81	5.295	3036.8
NpgA-1351636_18_4-6	-7.519	2.313	2.736	3036.8
NpgA-1112968_42_9-7	-7.518	1.112	1.989	3041.94
NpgA-1310726_60_3-1	-7.518	0	0	3041.94
NpgA-139481_59_7-3	-7.517	1.545	3.072	3047.08
NpgA-2135_17_3-1	-7.517	0	0	3047.08
NpgA-198821_22_6-6	-7.516	10.65	13.22	3052.24
NpgA-856867_55_5-7	-7.516	6.969	11.5	3052.24
NpgA-156053_89_3-2	-7.513	1.208	1.84	3067.75
NpgA-33564_31_7-5	-7.513	2.341	8.505	3067.75
NpgA-516_35_8-7	-7.513	6.467	11.68	3067.75
NpgA-81098_60_4-5	-7.513	4.645	9.903	3067.75
NpgA-74150_27_9-1	-7.511	0	0	3078.13
NpgA-444731_52_6-4	-7.511	2.225	2.468	3078.13
NpgA-87760_53_0-9	-7.51	3.386	5.284	3083.34
NpgA-53_06_5-2	-7.51	1.756	7.491	3083.34
NpgA-66852_54_8-1	-7.51	0	0	3083.34
NpgA-1290543_63_3-6	-7.509	3.896	5.742	3088.55
NpgA-133033_93_9-5	-7.508	3.051	5.497	3093.78
NpgA-1226781_44_7-6	-7.508	6.753	8.467	3093.78
NpgA-52128_35_5-1	-7.508	0	0	3093.78
NpgA-668270_12_0-6	-7.507	4.564	7.789	3099.01
NpgA-474_25_9-1	-7.506	0	0	3104.25
NpgA-107724_20_9-4	-7.506	2.971	5.661	3104.25
NpgA-915087_33_1-1	-7.506	0	0	3104.25
NpgA-97322_87_7-6	-7.505	2.14	2.75	3109.5
NpgA-664338_39_0-3	-7.505	5.154	7.57	3109.5
NpgA-198821_22_6-7	-7.505	3.371	11.21	3109.5
NpgA-79_61_8-1	-7.505	0	0	3109.5
NpgA-444731_52_6-5	-7.501	2.57	3.07	3130.59
NpgA-198821_22_6-8	-7.5	3.826	11.21	3135.88
NpgA-98319_26_7-1	-7.5	0	0	3135.88
NpgA-726169_73_9-9	-7.5	2.676	11.47	3135.88
NpgA-57808_66_9-5	-7.5	5.413	8.043	3135.88
NpgA-366789_02_8-5	-7.499	7.504	9.597	3141.18
NpgA-189279_58_1-3	-7.499	3.312	6.084	3141.18
NpgA-171596_29_5-5	-7.498	2.429	5.853	3146.49
NpgA-842133_18_0-5	-7.498	1.653	2.481	3146.49
NpgA-127373_66_4-1	-7.498	0	0	3146.49
NpgA-7261_97_4-2	-7.497	1.792	9.683	3151.82
NpgA-81840_15_5-2	-7.495	2.032	3.325	3162.49
NpgA-439081_18_2-6	-7.494	4.542	8.309	3167.83
NpgA-1351636_18_4-7	-7.494	2.518	3.298	3167.83
NpgA-55268_75_2-1	-7.491	0	0	3183.93
NpgA-19794_93_5-3	-7.491	3.466	9.611	3183.93
NpgA-97322_87_7-7	-7.491	4.927	7.561	3183.93
NpgA-760937_92_6-4	-7.491	2.111	3.685	3183.93
NpgA-1112968_42_9-8	-7.491	1.711	2.111	3183.93
NpgA-129_03_3-2	-7.489	1.949	1.998	3194.71
NpgA-223673_61_8-6	-7.489	1.932	3.414	3194.71
NpgA-1513857_77_6-3	-7.488	2.985	5.091	3200.11
NpgA-53_36_1-2	-7.488	7.863	10.67	3200.11
NpgA-516_50_7-8	-7.487	8.47	10.49	3205.52
NpgA-147511_69_1-3	-7.487	2.456	4.82	3205.52
NpgA-444731_52_6-6	-7.486	3.31	4.342	3210.94
NpgA-7261_97_4-3	-7.486	7.121	8.851	3210.94
NpgA-223673_61_8-7	-7.485	3.141	5.219	3216.38
NpgA-112887_68_0-4	-7.484	5.79	11.92	3221.81
NpgA-147403_03_0-5	-7.484	2.118	7.82	3221.81
NpgA-94497_51_5-2	-7.483	5.586	8.796	3227.26
NpgA-1206161_97_8-4	-7.481	1.568	2.424	3238.19
NpgA-1513857_77_6-4	-7.477	3.064	5.374	3260.15
NpgA-1201438_56_3-1	-7.477	0	0	3260.15
NpgA-869572_92_9-6	-7.477	1.524	2.296	3260.15
NpgA-52128_35_5-2	-7.477	1.278	2.317	3260.15
NpgA-1201438_56_3-2	-7.475	1.812	2.82	3271.18
NpgA-189279_58_1-4	-7.475	4.663	6.919	3271.18
NpgA-1985605_59_1-8	-7.475	2.771	4.633	3271.18
NpgA-664338_39_0-4	-7.474	5.67	9.191	3276.72
NpgA-2062_84_2-9	-7.474	5.878	8.25	3276.72
NpgA-599_79_1-8	-7.474	6.644	9.25	3276.72
NpgA-920509_32_6-1	-7.473	0	0	3282.26
NpgA-1421373_65_0-6	-7.473	2.634	5.45	3282.26
NpgA-1112968_42_9-9	-7.472	3.447	4.597	3287.81
NpgA-1637781_04_4-5	-7.471	4.667	10.94	3293.37
NpgA-52_21_1-1	-7.47	0	0	3298.94
NpgA-111025_46_8-1	-7.47	0	0	3298.94
NpgA-69004_03_1-5	-7.469	2.807	3.705	3304.52
NpgA-13739_02_1-1	-7.468	0	0	3310.1
NpgA-312753_06_3-3	-7.468	2.554	5.514	3310.1
NpgA-134418_28_3-5	-7.466	1.649	2.145	3321.31
NpgA-739366_20_2-2	-7.465	2.415	3.901	3326.93
NpgA-59198_70_8-2	-7.462	2.488	4.043	3343.83
NpgA-50_02_2-1	-7.461	0	0	3349.49
NpgA-36505_84_7-4	-7.461	1.669	2.352	3349.49
NpgA-159811_51_5-1	-7.459	0	0	3360.83
NpgA-2101700_15_4-9	-7.459	3.664	10.98	3360.83
NpgA-52128_35_5-3	-7.459	0.1926	2.426	3360.83
NpgA-38647_11_9-2	-7.458	4.27	6.166	3366.51
NpgA-87269_97_4-1	-7.457	0	0	3372.2
NpgA-552_66_9-8	-7.457	6.296	10.43	3372.2
NpgA-1421373_65_0-7	-7.457	2.247	3.532	3372.2
NpgA-133033_93_9-6	-7.457	2.159	6.683	3372.2
NpgA-1143532_39_1-4	-7.456	4.839	9.413	3377.9
NpgA-638_94_8-3	-7.455	1.91	7.544	3383.62
NpgA-73_48_3-2	-7.454	4.429	6.862	3389.34
NpgA-2920_86_7-5	-7.454	6.055	8.999	3389.34
NpgA-516_50_7-9	-7.454	3.998	10.88	3389.34
NpgA-116649_85_5-5	-7.451	4.31	8.302	3406.56
NpgA-38647_11_9-3	-7.45	1.644	7.283	3412.32
NpgA-1809336_39_7-4	-7.45	2.264	3.068	3412.32
NpgA-330784_47_9-6	-7.449	5.113	8.156	3418.1
NpgA-133033_93_9-7	-7.449	1.944	2.837	3418.1
NpgA-739366_20_2-3	-7.449	1.502	2.388	3418.1
NpgA-74150_27_9-2	-7.449	2.882	10.24	3418.1
NpgA-497833_27_9-8	-7.448	3.603	11.92	3423.88
NpgA-51333_22_3-3	-7.447	4.789	7.386	3429.67
NpgA-625115_55_1-6	-7.447	2.093	3.585	3429.67
NpgA-69004_03_1-6	-7.446	6.037	8.647	3435.47
NpgA-1217486_61_7-6	-7.446	7.528	10.56	3435.47
NpgA-668270_12_0-7	-7.446	3.951	7.066	3435.47
NpgA-936563_87_0-7	-7.444	2.119	3.703	3447.09
NpgA-356068_94_5-5	-7.444	3.811	9.774	3447.09
NpgA-920509_32_6-2	-7.444	5.112	8.467	3447.09
NpgA-118292_40_3-1	-7.443	0	0	3452.92
NpgA-224785_90_4-1	-7.443	0	0	3452.92
NpgA-313368_91_1-2	-7.442	2.495	4.322	3458.76
NpgA-651_48_9-3	-7.441	2.623	4.159	3464.61
NpgA-514_36_3-1	-7.441	0	0	3464.61
NpgA-474_25_9-2	-7.441	1.878	8.32	3464.61
NpgA-106516_24_9-9	-7.44	5.021	8.988	3470.47
NpgA-668270_12_0-8	-7.438	1.846	8.29	3482.22
NpgA-625115_55_1-7	-7.437	1.873	4.447	3488.11
NpgA-34161_24_5-6	-7.436	5.048	7.3	3494.01
NpgA-1201438_56_3-3	-7.436	1.426	1.819	3494.01
NpgA-125_10_0-2	-7.435	2.245	3.482	3499.92
NpgA-2668_66_8-1	-7.435	0	0	3499.92
NpgA-94497_51_5-3	-7.434	8.012	10.96	3505.83
NpgA-518_28_5-2	-7.434	0.4827	2.375	3505.83
NpgA-1290543_63_3-7	-7.432	5.106	9.644	3517.7
NpgA-53_03_2-1	-7.431	0	0	3523.65
NpgA-920509_32_6-3	-7.431	5.779	7.892	3523.65
NpgA-223673_61_8-8	-7.43	5.369	7.19	3529.61
NpgA-131_69_1-3	-7.43	1.452	1.725	3529.61
NpgA-1211441_98_3-5	-7.43	2.029	3.902	3529.61
NpgA-52128_35_5-4	-7.43	1.206	3.22	3529.61
NpgA-104746_04_5-1	-7.43	0	0	3529.61
NpgA-842133_18_0-6	-7.429	7.221	10.53	3535.58
NpgA-870964_67_3-8	-7.428	7.111	9.554	3541.56
NpgA-33564_31_7-6	-7.428	4.415	6.555	3541.56
NpgA-2921_57_5-8	-7.426	8.352	11.12	3553.55
NpgA-69004_03_1-7	-7.425	6.506	9.133	3559.56
NpgA-850140_72_6-2	-7.425	1.317	1.65	3559.56
NpgA-3313_26_6-6	-7.424	3.041	6.413	3565.58
NpgA-107868_30_4-1	-7.424	0	0	3565.58
NpgA-808118_40_3-5	-7.424	2.184	3.165	3565.58
NpgA-10457_90_6-3	-7.424	5.651	10.86	3565.58
NpgA-1262132_81_9-1	-7.424	0	0	3565.58
NpgA-52_01_7-2	-7.423	2.602	3.01	3571.61
NpgA-7681_14_3-2	-7.423	2.118	3.073	3571.61
NpgA-83_49_8-3	-7.423	4.52	8.087	3571.61
NpgA-7681_14_3-3	-7.423	2.805	4.455	3571.61
NpgA-1809336_39_7-5	-7.422	2.45	10.77	3577.65
NpgA-942195_55_3-5	-7.422	3.162	6.431	3577.65
NpgA-19608_29_8-1	-7.422	0	0	3577.65
NpgA-94497_51_5-4	-7.422	6.061	9.221	3577.65
NpgA-245765_41_7-1	-7.421	0	0	3583.7
NpgA-21187_98_4-2	-7.42	3.494	5.174	3589.76
NpgA-739366_20_2-4	-7.419	2.703	4.439	3595.83
NpgA-72797_41_2-1	-7.419	0	0	3595.83
NpgA-1194506_26_7-2	-7.418	4.25	8.303	3601.91
NpgA-2628280_40_8-1	-7.418	0	0	3601.91
NpgA-7689_03_4-1	-7.418	0	0	3601.91
NpgA-976_71_6-3	-7.417	1.425	7.674	3608
NpgA-113617_63_3-1	-7.416	0	0	3614.1
NpgA-1809336_39_7-6	-7.416	2.328	10.4	3614.1
NpgA-1194506_26_7-3	-7.415	4.193	7.889	3620.21
NpgA-1226781_44_7-7	-7.414	6.075	8.398	3626.33
NpgA-33564_31_7-7	-7.414	2.349	8.123	3626.33
NpgA-330784_47_9-7	-7.414	6.192	8.107	3626.33
NpgA-95635_55_5-9	-7.413	1.528	11.43	3632.47
NpgA-36322_90_4-1	-7.413	0	0	3632.47
NpgA-133033_93_9-8	-7.411	2.914	5.363	3644.76
NpgA-72956_09_3-2	-7.41	2.326	5.304	3650.93
NpgA-1256580_46_7-3	-7.41	2.726	11.04	3650.93
NpgA-134418_28_3-6	-7.41	3.884	5.388	3650.93
NpgA-356_12_7-2	-7.41	2.925	5.31	3650.93
NpgA-72956_09_3-3	-7.409	5.514	7.143	3657.1
NpgA-869572_92_9-7	-7.409	6.946	8.937	3657.1
NpgA-187235_37_6-3	-7.408	6.67	8.4	3663.29
NpgA-1262132_81_9-2	-7.407	5.428	7.498	3669.48
NpgA-111025_46_8-2	-7.407	10.28	12.41	3669.48
NpgA-850140_72_6-3	-7.405	5.187	10.39	3681.9
NpgA-864070_44_0-2	-7.405	5.68	9.129	3681.9
NpgA-83366_66_9-5	-7.404	1.664	2.535	3688.13
NpgA-72956_09_3-4	-7.404	1.129	3.118	3688.13
NpgA-956104_40_8-1	-7.404	0	0	3688.13
NpgA-1226781_44_7-8	-7.402	6.186	8.627	3700.61
NpgA-382_67_2-1	-7.402	0	0	3700.61
NpgA-2557_49_5-3	-7.401	2.374	3.765	3706.87
NpgA-870281_82_6-2	-7.401	2.921	6.658	3706.87
NpgA-870281_82_6-3	-7.4	3.093	7.179	3713.14
NpgA-67392_87_4-4	-7.4	5.095	6.268	3713.14
NpgA-1629229_37_3-1	-7.4	0	0	3713.14
NpgA-356068_94_5-6	-7.399	2.288	3.971	3719.42
NpgA-444731_52_6-7	-7.398	5.727	11.38	3725.71
NpgA-10457_90_6-4	-7.397	5.597	11.03	3732.01
NpgA-223673_61_8-9	-7.396	1.832	3.193	3738.32
NpgA-942195_55_3-6	-7.395	2.831	5.745	3744.64
NpgA-2203_97_6-2	-7.395	5.516	8.3	3744.64
NpgA-134418_28_3-7	-7.394	3.233	5.379	3750.98
NpgA-897016_82_9-7	-7.394	2.234	2.606	3750.98
NpgA-1308672_74_3-9	-7.393	2.171	2.796	3757.32
NpgA-1206161_97_8-5	-7.393	10.72	13.15	3757.32
NpgA-1207456_01_6-3	-7.393	4.308	6.678	3757.32
NpgA-78110_38_0-1	-7.392	0	0	3763.67
NpgA-444731_52_6-8	-7.392	5.295	11.1	3763.67
NpgA-915087_33_1-2	-7.392	8.432	11.45	3763.67
NpgA-57808_66_9-6	-7.39	4.041	10.53	3776.41
NpgA-1260533_36_5-1	-7.39	0	0	3776.41
NpgA-252017_04_2-7	-7.39	5.047	10.07	3776.41
NpgA-132810_10_7-1	-7.39	0	0	3776.41
NpgA-1492952_76_7-6	-7.389	2.212	2.867	3782.8
NpgA-313_67_7-1	-7.388	0	0	3789.2
NpgA-897016_82_9-8	-7.388	2.29	12.03	3789.2
NpgA-1211441_98_3-6	-7.387	3.546	10.54	3795.6
NpgA-552_66_9-9	-7.387	6.994	10.43	3795.6
NpgA-2628280_40_8-2	-7.386	2.607	4.546	3802.02
NpgA-116649_85_5-6	-7.386	3.944	8.649	3802.02
NpgA-34161_24_5-7	-7.386	5.111	7.445	3802.02
NpgA-34552_84_6-3	-7.384	3.453	6.047	3814.89
NpgA-169590_41_4-1	-7.384	0	0	3814.89
NpgA-88495_63_0-1	-7.383	0	0	3821.34
NpgA-936563_87_0-8	-7.383	7.439	10.02	3821.34
NpgA-1985605_59_1-9	-7.382	3.114	5.194	3827.81
NpgA-1454846_35_5-2	-7.382	2.274	4.841	3827.81
NpgA-198821_22_6-9	-7.381	12.04	13.72	3834.28
NpgA-1492952_76_7-7	-7.381	2.26	2.944	3834.28
NpgA-313368_91_1-3	-7.381	2.363	3.92	3834.28
NpgA-76_25_5-2	-7.38	2.162	7.088	3840.76
NpgA-1262132_81_9-3	-7.38	5.145	7.44	3840.76
NpgA-1143532_39_1-5	-7.38	5.3	10.48	3840.76
NpgA-839712_12_8-1	-7.38	0	0	3840.76
NpgA-2135_17_3-2	-7.38	1.947	7.416	3840.76
NpgA-139481_59_7-4	-7.38	2.586	7.629	3840.76
NpgA-83_43_2-1	-7.378	0	0	3853.77
NpgA-297_76_7-1	-7.377	0	0	3860.28
NpgA-68302_57_8-2	-7.377	1.938	3.109	3860.28
NpgA-15183_37_6-1	-7.377	0	0	3860.28
NpgA-3093_35_4-2	-7.376	2.869	7.434	3866.81
NpgA-1038915_60_4-2	-7.375	8.912	10.29	3873.35
NpgA-171596_29_5-6	-7.374	2.655	5.885	3879.9
NpgA-864070_44_0-3	-7.374	1.277	2.625	3879.9
NpgA-137862_53_4-1	-7.374	0	0	3879.9
NpgA-81840_15_5-3	-7.374	4.65	8.401	3879.9
NpgA-1206161_97_8-6	-7.373	2.333	2.773	3886.46
NpgA-1297538_32_9-8	-7.373	4.336	10.93	3886.46
NpgA-150322_43_3-2	-7.373	1.91	3.5	3886.46
NpgA-761423_87_4-5	-7.373	5.995	7.762	3886.46
NpgA-1448169_71_8-3	-7.373	2.245	3.684	3886.46
NpgA-356068_94_5-7	-7.371	4.678	7.454	3899.62
NpgA-1194506_26_7-4	-7.371	4.69	7.163	3899.62
NpgA-920509_32_6-4	-7.37	0.1778	1.71	3906.21
NpgA-315_72_0-1	-7.37	0	0	3906.21
NpgA-356_12_7-3	-7.369	2.403	7.711	3912.82
NpgA-7681_14_3-4	-7.369	5.001	7.925	3912.82
NpgA-14484_47_0-3	-7.368	1.515	2.377	3919.43
NpgA-1211441_98_3-7	-7.368	1.606	2.15	3919.43
NpgA-100986_85_4-1	-7.367	0	0	3926.06
NpgA-57808_66_9-7	-7.367	4.784	10.39	3926.06
NpgA-59198_70_8-3	-7.367	5.069	8.039	3926.06
NpgA-120014_06_4-1	-7.365	0	0	3939.35
NpgA-1108_68_5-4	-7.364	4.663	8.238	3946.02
NpgA-50_27_1-1	-7.363	0	0	3952.69
NpgA-17230_88_5-1	-7.363	0	0	3952.69
NpgA-520_85_4-2	-7.363	3.659	6.722	3952.69
NpgA-1351636_18_4-8	-7.363	2.809	4.153	3952.69
NpgA-33564_31_7-8	-7.363	4.858	7.17	3952.69
NpgA-83366_66_9-6	-7.362	3.878	11.81	3959.37
NpgA-105102_22_5-1	-7.361	0	0	3966.07
NpgA-706779_91_1-1	-7.361	0	0	3966.07
NpgA-72956_09_3-5	-7.36	7.427	9.227	3972.78
NpgA-856867_55_5-8	-7.359	6.987	11.16	3979.49
NpgA-1310726_60_3-2	-7.359	8.869	10.44	3979.49
NpgA-7689_03_4-2	-7.358	3.681	7.224	3986.22
NpgA-856866_72_3-4	-7.358	5.189	10.53	3986.22
NpgA-1887014_12_1-1	-7.358	0	0	3986.22
NpgA-138402_11_6-3	-7.358	2.247	7.426	3986.22
NpgA-189279_58_1-5	-7.357	2.687	7.669	3992.96
NpgA-366789_02_8-6	-7.355	9.119	11.81	4006.48
NpgA-625115_55_1-8	-7.355	4.869	7.251	4006.48
NpgA-120014_06_4-2	-7.354	1.744	3.244	4013.26
NpgA-1194506_26_7-5	-7.354	3.388	4.999	4013.26
NpgA-1201438_56_3-4	-7.354	3.808	6.593	4013.26
NpgA-1223403_58_4-1	-7.352	0	0	4026.84
NpgA-942195_55_3-7	-7.352	2.156	3.121	4026.84
NpgA-69004_03_1-8	-7.351	6.462	9.074	4033.65
NpgA-19216_56_9-2	-7.35	3.619	9.043	4040.47
NpgA-138402_11_6-4	-7.348	2.345	7.93	4054.15
NpgA-161715_24_8-1	-7.346	0	0	4067.87
NpgA-57149_07_2-1	-7.346	0	0	4067.87
NpgA-80573_04_2-1	-7.346	0	0	4067.87
NpgA-80573_04_2-2	-7.345	1.623	2.175	4074.75
NpgA-315_72_0-2	-7.345	1.808	4.072	4074.75
NpgA-33564_31_7-9	-7.345	2.238	8.074	4074.75
NpgA-81840_15_5-4	-7.344	3.191	5.466	4081.64
NpgA-115_33_3-5	-7.343	2.61	7.505	4088.55
NpgA-56_47_3-2	-7.343	5.961	7.616	4088.55
NpgA-1421373_65_0-8	-7.343	2.964	4.522	4088.55
NpgA-1421373_65_0-9	-7.343	2.207	10.84	4088.55
NpgA-68302_57_8-3	-7.343	1.677	2.784	4088.55
NpgA-1108_68_5-5	-7.343	4.176	7.888	4088.55
NpgA-2920_86_7-6	-7.342	1.53	2.024	4095.46
NpgA-312753_06_3-4	-7.342	5.073	8.206	4095.46
NpgA-599_79_1-9	-7.342	7.553	10.84	4095.46
NpgA-25122_46_7-2	-7.341	2.961	7.727	4102.39
NpgA-864070_44_0-4	-7.341	1.661	2.363	4102.39
NpgA-839712_12_8-2	-7.339	2.605	3.575	4116.27
NpgA-97322_87_7-8	-7.339	1.606	2.164	4116.27
NpgA-497833_27_9-9	-7.337	3.493	12.16	4130.21
NpgA-1143532_39_1-6	-7.337	4.781	9.412	4130.21
NpgA-127373_66_4-2	-7.336	5.281	9.507	4137.19
NpgA-19216_56_9-3	-7.336	5.823	7.362	4137.19
NpgA-112887_68_0-5	-7.335	3.203	5.014	4144.19
NpgA-103475_41_8-1	-7.335	0	0	4144.19
NpgA-148016_81_3-1	-7.334	0	0	4151.2
NpgA-73_48_3-3	-7.334	4.564	8.292	4151.2
NpgA-52128_35_5-5	-7.333	5.281	8.822	4158.22
NpgA-312753_06_3-5	-7.332	2.396	5.698	4165.25
NpgA-81098_60_4-6	-7.332	1.709	2.56	4165.25
NpgA-74150_27_9-3	-7.332	1.615	1.977	4165.25
NpgA-252017_04_2-8	-7.332	2.21	2.801	4165.25
NpgA-125_13_3-1	-7.331	0	0	4172.29
NpgA-1290543_63_3-8	-7.331	5.775	10.62	4172.29
NpgA-312753_06_3-6	-7.33	2.302	4.524	4179.35
NpgA-147059_72_1-2	-7.33	2.32	4.735	4179.35
NpgA-94497_51_5-5	-7.33	1.599	2.609	4179.35
NpgA-483_04_5-1	-7.329	0	0	4186.42
NpgA-118292_40_3-2	-7.328	7.906	11.07	4193.5
NpgA-112811_59_3-1	-7.328	0	0	4193.5
NpgA-128794_94_5-2	-7.328	3.707	6.656	4193.5
NpgA-51333_22_3-4	-7.326	4.495	7.171	4207.69
NpgA-128794_94_5-3	-7.325	8.265	11.21	4214.81
NpgA-1211441_98_3-8	-7.325	2.497	3.534	4214.81
NpgA-625115_55_1-9	-7.325	2.144	2.996	4214.81
NpgA-739366_20_2-5	-7.324	2.313	3.942	4221.93
NpgA-139755_83_2-1	-7.324	0	0	4221.93
NpgA-147511_69_1-4	-7.323	3.873	7.855	4229.07
NpgA-417716_92_8-5	-7.323	3.339	9.823	4229.07
NpgA-298_46_4-1	-7.322	0	0	4236.23
NpgA-366789_02_8-7	-7.321	7.981	9.183	4243.39
NpgA-13739_02_1-2	-7.319	3.549	4.361	4257.75
NpgA-94497_51_5-6	-7.319	5.477	8.751	4257.75
NpgA-81098_60_4-7	-7.319	2.819	3.891	4257.75
NpgA-13209_41_1-1	-7.319	0	0	4257.75
NpgA-417716_92_8-6	-7.318	2.467	9.159	4264.95
NpgA-67_73_2-4	-7.318	2.829	7.229	4264.95
NpgA-25122_46_7-3	-7.317	2.366	3.618	4272.17
NpgA-53_03_2-2	-7.317	1.715	7.407	4272.17
NpgA-1194506_26_7-6	-7.317	2.324	3.464	4272.17
NpgA-169590_42_5-2	-7.317	5.272	7.122	4272.17
NpgA-14605_22_2-5	-7.317	3.762	6.578	4272.17
NpgA-55096_26_9-1	-7.316	0	0	4279.39
NpgA-139755_83_2-2	-7.315	4.48	8.671	4286.63
NpgA-99464_64_9-1	-7.315	0	0	4286.63
NpgA-83928_76_1-1	-7.315	0	0	4286.63
NpgA-122320_73_4-1	-7.315	0	0	4286.63
NpgA-1208319_26_9-1	-7.314	0	0	4293.88
NpgA-956104_40_8-2	-7.313	2.533	9.221	4301.14
NpgA-150322_43_3-3	-7.312	2.053	3.059	4308.41
NpgA-31431_39_7-2	-7.312	6.162	8.424	4308.41
NpgA-50_02_2-2	-7.31	1.715	7.371	4323
NpgA-1802220_02_5-3	-7.31	2.252	4.719	4323
NpgA-113617_63_3-2	-7.309	0.8424	1.867	4330.31
NpgA-842133_18_0-7	-7.309	5.403	9.662	4330.31
NpgA-65847_85_0-1	-7.308	0	0	4337.63
NpgA-1201438_56_3-5	-7.308	3.886	6.837	4337.63
NpgA-22888_70_6-9	-7.308	2.223	9.384	4337.63
NpgA-356_12_7-4	-7.307	2.936	8.235	4344.97
NpgA-1038915_60_4-3	-7.307	7.518	9.681	4344.97
NpgA-94497_51_5-7	-7.307	1.125	2.827	4344.97
NpgA-760937_92_6-5	-7.307	5.457	7.256	4344.97
NpgA-91832_40_5-1	-7.307	0	0	4344.97
NpgA-1448169_71_8-4	-7.306	2.792	10.24	4352.31
NpgA-110871_86_8-1	-7.306	0	0	4352.31
NpgA-129722_12_9-9	-7.305	4.744	11.56	4359.67
NpgA-976_71_6-4	-7.305	4.708	8.168	4359.67
NpgA-1290543_63_3-9	-7.304	3.632	5.468	4367.05
NpgA-313368_91_1-4	-7.303	3.969	6.049	4374.43
NpgA-81840_15_5-5	-7.302	5.761	7.993	4381.83
NpgA-739366_20_2-6	-7.302	2.565	4.828	4381.83
NpgA-83366_66_9-7	-7.302	2.047	2.838	4381.83
NpgA-3093_35_4-3	-7.301	2.881	7.283	4389.24
NpgA-115956_12_2-2	-7.301	3.18	4.696	4389.24
NpgA-1207456_01_6-4	-7.3	2.392	2.945	4396.66
NpgA-116_43_8-1	-7.3	0	0	4396.66
NpgA-557795_19_4-1	-7.299	0	0	4404.1
NpgA-382_67_2-2	-7.299	1.638	7.305	4404.1
NpgA-1893_33_0-1	-7.299	0	0	4404.1
NpgA-147084_10_4-1	-7.299	0	0	4404.1
NpgA-897016_82_9-9	-7.298	1.776	2.141	4411.55
NpgA-52128_35_5-6	-7.298	5.275	8.369	4411.55
NpgA-444731_52_6-9	-7.298	2.983	3.92	4411.55
NpgA-864070_44_0-5	-7.297	5.898	9.216	4419.01
NpgA-312753_06_3-7	-7.297	2.197	4.472	4419.01
NpgA-116649_85_5-7	-7.297	5.142	6.97	4419.01
NpgA-5786_21_0-1	-7.297	0	0	4419.01
NpgA-36505_84_7-5	-7.296	3.21	10.76	4426.48
NpgA-80573_04_2-3	-7.296	10.69	12.76	4426.48
NpgA-1632006_28_0-3	-7.296	5.073	8.484	4426.48
NpgA-842133_18_0-8	-7.295	5.456	9.451	4433.96
NpgA-67392_87_4-5	-7.294	6.006	8.756	4441.46
NpgA-21187_98_4-3	-7.293	4.005	9.04	4448.97
NpgA-83928_76_1-2	-7.292	1.754	2.542	4456.5
NpgA-65847_85_0-2	-7.291	5.546	7.182	4464.03
NpgA-330784_47_9-8	-7.29	2.681	5.212	4471.58
NpgA-109351_34_0-2	-7.29	1.489	1.691	4471.58
NpgA-1632006_28_0-4	-7.289	2.517	3.327	4479.15
NpgA-1310726_60_3-3	-7.289	1.014	1.378	4479.15
NpgA-1524_88_5-3	-7.289	2.26	3.932	4479.15
NpgA-1297538_32_9-9	-7.288	3.086	3.58	4486.72
NpgA-34161_24_5-8	-7.288	3.933	6.198	4486.72
NpgA-59198_70_8-4	-7.288	5.05	8.236	4486.72
NpgA-49562_28_9-1	-7.287	0	0	4494.31
NpgA-115_33_3-6	-7.287	2.419	7.144	4494.31
NpgA-124_94_7-1	-7.287	0	0	4494.31
NpgA-125_13_3-2	-7.287	2.532	4.528	4494.31
NpgA-56_47_3-3	-7.286	1.615	8.579	4501.91
NpgA-936563_87_0-9	-7.285	2.616	4.272	4509.52
NpgA-90357_06_5-1	-7.285	0	0	4509.52
NpgA-869572_92_9-8	-7.285	6.827	8.841	4509.52
NpgA-7261_97_4-4	-7.285	6.421	8.501	4509.52
NpgA-73_48_3-4	-7.284	2.084	2.53	4517.15
NpgA-3562_63_8-1	-7.284	0	0	4517.15
NpgA-38748_32_2-1	-7.284	0	0	4517.15
NpgA-19608_29_8-2	-7.283	5.216	7.55	4524.79
NpgA-115956_12_2-3	-7.283	2.127	2.532	4524.79
NpgA-1446261_44_4-2	-7.283	2.096	2.892	4524.79
NpgA-1194506_26_7-7	-7.282	5.107	8.623	4532.44
NpgA-109351_34_0-3	-7.282	1.818	9.905	4532.44
NpgA-2058_52_8-1	-7.281	0	0	4540.1
NpgA-189279_58_1-6	-7.28	4.452	6.127	4547.78
NpgA-312753_06_3-8	-7.279	2.185	5.352	4555.47
NpgA-252017_04_2-9	-7.279	5.257	6.86	4555.47
NpgA-112887_68_0-6	-7.278	2.714	4.855	4563.18
NpgA-3313_26_6-7	-7.277	2.627	6.885	4570.89
NpgA-557795_19_4-2	-7.277	3.882	9.982	4570.89
NpgA-13647_35_3-1	-7.277	0	0	4570.89
NpgA-313368_91_1-5	-7.276	4.108	8.15	4578.62
NpgA-139755_83_2-3	-7.275	1.64	2.644	4586.36
NpgA-50_03_3-2	-7.275	2.476	3.736	4586.36
NpgA-87269_97_4-2	-7.275	1.694	7.662	4586.36
NpgA-113617_63_3-3	-7.275	3.179	6.954	4586.36
NpgA-34552_84_6-4	-7.274	3.127	6.36	4594.12
NpgA-595_33_5-1	-7.274	0	0	4594.12
NpgA-109351_34_0-4	-7.273	1.965	9.851	4601.89
NpgA-81098_60_4-8	-7.273	4.701	10.28	4601.89
NpgA-52_21_1-2	-7.273	2.35	3.596	4601.89
NpgA-132810_10_7-2	-7.272	1.899	2.936	4609.67
NpgA-189279_58_1-7	-7.272	2.863	5.783	4609.67
NpgA-923287_50_7-6	-7.271	2.253	3.24	4617.47
NpgA-72956_09_3-6	-7.27	1.936	4.637	4625.28
NpgA-34161_24_5-9	-7.27	3.967	6.028	4625.28
NpgA-19794_93_5-4	-7.269	3.729	9.765	4633.1
NpgA-1038915_60_4-4	-7.269	5.775	7.133	4633.1
NpgA-76_25_5-3	-7.269	1.934	7.389	4633.1
NpgA-739366_20_2-7	-7.268	2.493	3.555	4640.93
NpgA-1247_42_3-1	-7.267	0	0	4648.78
NpgA-139755_83_2-4	-7.267	1.876	3.139	4648.78
NpgA-72956_09_3-7	-7.267	2.72	3.637	4648.78
NpgA-82419_36_1-1	-7.266	0	0	4656.64
NpgA-81_23_2-5	-7.266	4.912	6.24	4656.64
NpgA-118292_40_3-3	-7.266	7.826	10.96	4656.64
NpgA-302962_49_8-8	-7.266	3.082	3.907	4656.64
NpgA-854107_55_4-1	-7.266	0	0	4656.64
NpgA-14605_22_2-6	-7.265	2.949	5.324	4664.52
NpgA-4419_39_0-1	-7.265	0	0	4664.52
NpgA-100986_85_4-2	-7.265	0.6904	1.218	4664.52
NpgA-29216_28_2-2	-7.264	1.799	5.335	4672.41
NpgA-57808_66_9-8	-7.264	4.372	10.78	4672.41
NpgA-1887014_12_1-2	-7.263	4.868	7.961	4680.31
NpgA-87269_97_4-3	-7.262	3.889	8.272	4688.22
NpgA-138402_11_6-5	-7.262	4.488	7.7	4688.22
NpgA-1313725_88_0-2	-7.262	4.871	7.514	4688.22
NpgA-1217486_61_7-7	-7.261	6.647	9.941	4696.15
NpgA-944118_01_8-1	-7.261	0	0	4696.15
NpgA-116_43_8-2	-7.261	1.328	1.759	4696.15
NpgA-112887_68_0-7	-7.26	6.671	12.34	4704.09
NpgA-942195_55_3-8	-7.26	3.075	5.172	4704.09
NpgA-664338_39_0-5	-7.259	3.419	10.6	4712.05
NpgA-114798_26_4-1	-7.259	0	0	4712.05
NpgA-976_71_6-5	-7.259	4.136	5.94	4712.05
NpgA-1887014_12_1-3	-7.258	1.861	1.885	4720.02
NpgA-1210344_57_2-1	-7.258	0	0	4720.02
NpgA-14605_22_2-7	-7.257	8.182	10.46	4728
NpgA-147403_03_0-6	-7.255	2.309	3.032	4744
NpgA-112887_68_0-8	-7.254	6.931	8.557	4752.03
NpgA-59198_70_8-5	-7.254	2.012	4.13	4752.03
NpgA-224785_90_4-2	-7.254	1.722	2.136	4752.03
NpgA-879085_55_9-5	-7.253	6.926	9.714	4760.06
NpgA-1637781_04_4-6	-7.253	4.962	11.26	4760.06
NpgA-1211441_98_3-9	-7.253	2.483	3.457	4760.06
NpgA-133033_93_9-9	-7.252	2.724	5.14	4768.11
NpgA-56995_20_1-1	-7.252	0	0	4768.11
NpgA-668270_12_0-9	-7.252	2.746	8.659	4768.11
NpgA-1492952_76_7-8	-7.252	5.624	10.96	4768.11
NpgA-944118_01_8-2	-7.252	1.837	3.327	4768.11
NpgA-366789_02_8-8	-7.251	7.074	9.903	4776.18
NpgA-1809336_39_7-7	-7.251	5.173	7.574	4776.18
NpgA-1201438_56_3-6	-7.251	3.949	6.052	4776.18
NpgA-870281_82_6-4	-7.249	3.092	7.347	4792.34
NpgA-113617_63_3-4	-7.249	2.502	4.11	4792.34
NpgA-81840_15_5-6	-7.248	2.674	9.943	4800.45
NpgA-109351_33_9-2	-7.248	2.694	2.945	4800.45
NpgA-83366_66_9-8	-7.247	1.412	1.767	4808.57
NpgA-127373_66_4-3	-7.246	2.372	3.098	4816.7
NpgA-1038915_60_4-5	-7.246	2.316	2.847	4816.7
NpgA-128794_94_5-4	-7.246	4.197	9.438	4816.7
NpgA-34552_84_6-5	-7.246	4.071	8.279	4816.7
NpgA-1513857_77_6-5	-7.245	3.539	10.47	4824.84
NpgA-1310726_60_3-4	-7.245	1.864	3.268	4824.84
NpgA-7759_35_5-1	-7.245	0	0	4824.84
NpgA-869572_92_9-9	-7.244	8.092	10.19	4833
NpgA-610798_31_7-1	-7.244	0	0	4833
NpgA-842133_18_0-9	-7.243	6.739	9.281	4841.18
NpgA-88495_63_0-2	-7.243	1.2	3.528	4841.18
NpgA-1454846_35_5-3	-7.243	1.867	2.678	4841.18
NpgA-97322_87_7-9	-7.242	5.76	7.947	4849.36
NpgA-474_25_9-3	-7.242	1.715	2.934	4849.36
NpgA-131_69_1-4	-7.239	2.413	2.788	4874.01
NpgA-83_43_2-2	-7.238	3.464	6.081	4882.25
NpgA-1809336_39_7-8	-7.238	3.113	10.48	4882.25
NpgA-852626_89_2-1	-7.238	0	0	4882.25
NpgA-870281_82_6-5	-7.236	3.055	7.411	4898.78
NpgA-439081_18_2-7	-7.235	8.253	11.55	4907.06
NpgA-52128_35_5-7	-7.235	2.246	3.511	4907.06
NpgA-1210344_57_2-2	-7.234	1.305	2.851	4915.36
NpgA-53_34_9-1	-7.234	0	0	4915.36
NpgA-125_13_3-3	-7.234	1.663	5.131	4915.36
NpgA-1415379_56_4-1	-7.233	0	0	4923.67
NpgA-1018899_04_1-1	-7.233	0	0	4923.67
NpgA-31430_15_6-3	-7.233	2.226	3.071	4923.67
NpgA-83366_66_9-9	-7.232	3.729	10.81	4932
NpgA-461432_26_8-2	-7.232	6.082	8.436	4932
NpgA-302962_49_8-9	-7.232	1.799	2.025	4932
NpgA-13209_41_1-2	-7.231	1.541	7.377	4940.34
NpgA-156053_89_3-3	-7.23	3.388	6.867	4948.69
NpgA-1187594_09_7-1	-7.229	0	0	4957.06
NpgA-57_96_5-1	-7.229	0	0	4957.06
NpgA-81098_60_4-9	-7.228	5.173	11.65	4965.44
NpgA-50_04_4-3	-7.228	1.788	8.255	4965.44
NpgA-1194506_26_7-8	-7.227	5.64	7.634	4973.84
NpgA-923287_50_7-7	-7.227	2.324	2.863	4973.84
NpgA-1632006_28_0-5	-7.227	4.42	8.024	4973.84
NpgA-4880_88_0-1	-7.227	0	0	4973.84
NpgA-920509_32_6-5	-7.227	2.229	8.955	4973.84
NpgA-36505_84_7-6	-7.226	3.283	10.8	4982.25
NpgA-779353_01_4-1	-7.226	0	0	4982.25
NpgA-856866_72_3-5	-7.226	5.318	10.54	4982.25
NpgA-870964_67_3-9	-7.224	7.016	9.71	4999.12
NpgA-25122_46_7-4	-7.224	4.433	7.47	4999.12
NpgA-500287_72_9-1	-7.222	0	0	5016.04
NpgA-52_86_8-1	-7.222	0	0	5016.04
NpgA-1338225_97_0-2	-7.221	3.742	4.763	5024.52
NpgA-31430_15_6-4	-7.221	5.824	8.771	5024.52
NpgA-761423_87_4-6	-7.221	5.225	7.398	5024.52
NpgA-1210344_57_2-3	-7.22	2.793	4.879	5033.02
NpgA-31430_15_6-5	-7.22	6.728	9.295	5033.02
NpgA-761423_87_4-7	-7.22	2.643	3.61	5033.02
NpgA-113617_63_3-5	-7.219	5.092	7.167	5041.53
NpgA-69004_03_1-9	-7.219	8.594	11.23	5041.53
NpgA-1632006_28_0-6	-7.219	1.561	2.271	5041.53
NpgA-854107_55_4-2	-7.218	1.305	1.571	5050.06
NpgA-417716_92_8-7	-7.218	4.998	7.096	5050.06
NpgA-169590_42_5-3	-7.217	3.799	5.502	5058.6
NpgA-2557_49_5-4	-7.217	4.155	6.439	5058.6
NpgA-2921_57_5-9	-7.216	8.513	11.97	5067.15
NpgA-1454846_35_5-4	-7.216	3.443	6	5067.15
NpgA-483_04_5-2	-7.216	5.955	7.864	5067.15
NpgA-313368_91_1-6	-7.215	4.673	7.28	5075.72
NpgA-74150_27_9-4	-7.215	1.905	2.809	5075.72
NpgA-38647_11_9-4	-7.215	2.264	3.843	5075.72
NpgA-474_25_9-4	-7.215	5.065	6.872	5075.72
NpgA-664338_39_0-6	-7.215	1.076	2.011	5075.72
NpgA-870281_82_6-6	-7.214	3.565	5.889	5084.3
NpgA-115956_12_2-4	-7.214	5.954	7.109	5084.3
NpgA-426_13_1-2	-7.214	3	6.234	5084.3
NpgA-110871_86_8-2	-7.214	3.216	6.982	5084.3
NpgA-1210344_57_2-4	-7.214	5.583	7.835	5084.3
NpgA-1893_33_0-2	-7.213	10.37	13.82	5092.9
NpgA-10457_90_6-5	-7.212	1.701	2.082	5101.52
NpgA-112887_68_0-9	-7.212	5.354	8.643	5101.52
NpgA-1448169_71_8-5	-7.212	2.401	10.1	5101.52
NpgA-3562_63_8-2	-7.212	3.602	6.728	5101.52
NpgA-1346242_81_6-1	-7.212	0	0	5101.52
NpgA-152_72_7-2	-7.212	0.8503	2.054	5101.52
NpgA-52128_35_5-8	-7.211	7.637	10.14	5110.14
NpgA-189279_58_1-8	-7.208	3.699	5.73	5136.11
NpgA-3385_03_3-3	-7.208	5.042	7.899	5136.11
NpgA-245765_41_7-2	-7.208	5.455	8.166	5136.11
NpgA-169590_42_5-4	-7.207	5.105	7.093	5144.8
NpgA-1201438_56_3-7	-7.207	2.243	5.119	5144.8
NpgA-1448169_71_8-6	-7.207	2.564	10.24	5144.8
NpgA-960539_70_2-1	-7.207	0	0	5144.8
NpgA-147403_03_0-7	-7.206	2.064	8.356	5153.5
NpgA-1802220_02_5-4	-7.206	2.8	5.492	5153.5
NpgA-144689_24_7-1	-7.204	0	0	5170.94
NpgA-1809336_39_7-9	-7.204	7.514	11.31	5170.94
NpgA-107724_20_9-5	-7.204	2.495	4.575	5170.94
NpgA-125_10_0-3	-7.204	7.846	10.23	5170.94
NpgA-426_13_1-3	-7.203	3.236	5.828	5179.69
NpgA-1247_42_3-2	-7.202	4.37	7.399	5188.45
NpgA-864070_44_0-6	-7.201	6.435	9.238	5197.22
NpgA-417716_92_8-8	-7.201	5.667	7.315	5197.22
NpgA-124_94_7-2	-7.201	1.85	7.204	5197.22
NpgA-1260533_36_5-2	-7.201	3.614	10.08	5197.22
NpgA-27848_84_6-3	-7.2	4.946	7.164	5206.01
NpgA-50_03_3-3	-7.2	1.396	2.183	5206.01
NpgA-1351636_18_4-9	-7.198	3.092	10.75	5223.63
NpgA-1893_33_0-3	-7.198	9.316	12.57	5223.63
NpgA-67392_87_4-6	-7.197	4.507	8.122	5232.47
NpgA-297_76_7-2	-7.197	1.403	2.001	5232.47
NpgA-1262132_81_9-4	-7.196	1.844	2.949	5241.32
NpgA-879085_55_9-6	-7.196	1.698	2.079	5241.32
NpgA-189279_58_1-9	-7.196	2.978	5.206	5241.32
NpgA-81840_15_5-7	-7.195	1.843	2.755	5250.18
NpgA-3819_00_9-1	-7.195	0	0	5250.18
NpgA-1206161_97_8-7	-7.195	5.571	8.78	5250.18
NpgA-83928_76_1-3	-7.194	2.82	4.865	5259.06
NpgA-19794_93_5-5	-7.194	4.347	6.991	5259.06
NpgA-88495_63_0-3	-7.193	2.713	4.847	5267.95
NpgA-10457_90_6-6	-7.192	5.391	10.86	5276.86
NpgA-1632006_28_0-7	-7.192	2.47	3.452	5276.86
NpgA-72956_09_3-8	-7.192	5.64	7.351	5276.86
NpgA-68302_57_8-4	-7.192	1.276	1.706	5276.86
NpgA-90357_06_5-2	-7.191	8.88	11.72	5285.78
NpgA-1256580_46_7-4	-7.191	2.964	11.23	5285.78
NpgA-1056634_68_4-4	-7.19	2.281	2.901	5294.72
NpgA-139481_59_7-5	-7.19	1.579	3.233	5294.72
NpgA-474_25_9-5	-7.19	1.802	3.101	5294.72
NpgA-26844_12_2-7	-7.189	5.806	7.705	5303.68
NpgA-115_33_3-7	-7.189	2.625	5.783	5303.68
NpgA-608141_41_9-5	-7.189	2.992	6.974	5303.68
NpgA-461432_26_8-3	-7.188	1.118	2.661	5312.65
NpgA-664338_39_0-7	-7.187	5.782	8.786	5321.63
NpgA-7261_97_4-5	-7.186	4.178	5.262	5330.63
NpgA-89565_68_4-1	-7.185	0	0	5339.64
NpgA-125_10_0-4	-7.185	1.379	2.233	5339.64
NpgA-41859_67_0-1	-7.185	0	0	5339.64
NpgA-88040_23_7-1	-7.185	0	0	5339.64
NpgA-850140_72_6-4	-7.184	4.911	9.388	5348.67
NpgA-2557_49_5-5	-7.184	3.029	3.854	5348.67
NpgA-1174018_99_5-1	-7.183	0	0	5357.72
NpgA-483_04_5-3	-7.182	5.666	8.053	5366.78
NpgA-923287_50_7-8	-7.182	5.735	8.079	5366.78
NpgA-139481_59_7-6	-7.182	1.879	2.527	5366.78
NpgA-312753_06_3-9	-7.181	3.24	6.941	5375.86
NpgA-1313725_88_0-3	-7.181	6.164	8.6	5375.86
NpgA-59198_70_8-6	-7.18	11.73	14.45	5384.95
NpgA-50_28_2-1	-7.179	0	0	5394.05
NpgA-761423_87_4-8	-7.177	1.853	2.846	5412.31
NpgA-113617_63_3-6	-7.177	2.046	4.162	5412.31
NpgA-1637781_04_4-7	-7.177	4.468	10.47	5412.31
NpgA-283173_50_2-1	-7.176	0	0	5421.47
NpgA-761423_87_4-9	-7.176	5.783	7.829	5421.47
NpgA-34661_75_1-1	-7.176	0	0	5421.47
NpgA-133454_47_4-5	-7.174	4.197	10.82	5439.82
NpgA-29216_28_2-3	-7.174	1.253	1.98	5439.82
NpgA-71125_38_7-1	-7.174	0	0	5439.82
NpgA-1893_33_0-4	-7.174	4.185	5.13	5439.82
NpgA-53_06_5-3	-7.174	4.497	6.275	5439.82
NpgA-68_96_2-2	-7.173	2.162	3.775	5449.02
NpgA-57149_07_2-2	-7.173	7.851	9.775	5449.02
NpgA-356_12_7-5	-7.173	4.56	7.138	5449.02
NpgA-224785_90_4-3	-7.173	2.24	4.41	5449.02
NpgA-67_73_2-5	-7.172	2.299	7.323	5458.23
NpgA-116649_85_5-8	-7.172	5.254	8.356	5458.23
NpgA-156053_89_3-4	-7.172	3.456	6.738	5458.23
NpgA-19608_29_8-3	-7.171	2.116	7.969	5467.46
NpgA-1056634_68_4-5	-7.171	1.648	1.776	5467.46
NpgA-55268_75_2-2	-7.17	5.185	7.456	5476.71
NpgA-1629229_37_3-2	-7.17	2.765	3.732	5476.71
NpgA-63610_08_2-1	-7.169	0	0	5485.97
NpgA-1448169_71_8-7	-7.169	3.425	6.093	5485.97
NpgA-65847_85_0-3	-7.169	6.433	9.12	5485.97
NpgA-760937_92_6-6	-7.169	1.889	2.399	5485.97
NpgA-1346242_81_6-2	-7.167	2.345	4.662	5504.54
NpgA-20424_00_4-1	-7.167	0	0	5504.54
NpgA-1415379_56_4-2	-7.165	1.009	1.789	5523.17
NpgA-606143_89_9-1	-7.165	0	0	5523.17
NpgA-79794_75_5-2	-7.165	1.806	2.223	5523.17
NpgA-779353_01_4-2	-7.164	1.9	2.488	5532.51
NpgA-960539_70_2-2	-7.164	1.917	6.905	5532.51
NpgA-118292_40_3-4	-7.163	8.156	11.33	5541.87
NpgA-1448169_71_8-8	-7.163	3.436	5.751	5541.87
NpgA-638_94_8-4	-7.163	1.941	7.496	5541.87
NpgA-169590_42_5-5	-7.162	5.135	7.23	5551.24
NpgA-1223403_58_4-2	-7.162	5.309	7.808	5551.24
NpgA-56_47_3-4	-7.161	1.778	8.311	5560.63
NpgA-103577_45_3-1	-7.161	0	0	5560.63
NpgA-139481_59_7-7	-7.16	3.911	6.024	5570.03
NpgA-1893_33_0-5	-7.159	9.512	12.87	5579.45
NpgA-1637781_04_4-8	-7.159	4.062	10.6	5579.45
NpgA-1802220_02_5-5	-7.159	3.166	6.909	5579.45
NpgA-103475_41_8-2	-7.159	0.599	1.646	5579.45
NpgA-479_41_4-1	-7.159	0	0	5579.45
NpgA-356068_94_5-8	-7.159	2.089	2.498	5579.45
NpgA-1223403_58_4-3	-7.159	4.506	6.999	5579.45
NpgA-1313725_88_0-4	-7.159	2.256	7.084	5579.45
NpgA-128794_94_5-5	-7.158	7.677	10.77	5588.89
NpgA-115956_12_2-5	-7.158	2.228	3.637	5588.89
NpgA-944118_01_8-3	-7.157	1.508	3.165	5598.34
NpgA-57149_07_2-3	-7.157	1.388	1.939	5598.34
NpgA-41859_67_0-2	-7.156	5.265	11.25	5607.81
NpgA-850140_72_6-5	-7.155	1.894	2.34	5617.29
NpgA-7689_03_4-3	-7.154	5.784	8.317	5626.79
NpgA-58_39_9-1	-7.154	0	0	5626.79
NpgA-301692_76_2-1	-7.154	0	0	5626.79
NpgA-138530_94_6-1	-7.154	0	0	5626.79
NpgA-14605_22_2-8	-7.154	8.389	10.83	5626.79
NpgA-23110_15_8-1	-7.153	0	0	5636.31
NpgA-5786_21_0-2	-7.153	2.572	5.778	5636.31
NpgA-2920_86_7-7	-7.152	2.781	7.97	5645.84
NpgA-187235_37_6-4	-7.152	1.707	2.122	5645.84
NpgA-52_01_7-3	-7.151	2.488	7.315	5655.38
NpgA-7261_97_4-6	-7.151	1.811	2.282	5655.38
NpgA-201530_41_8-6	-7.151	3.218	4.752	5655.38
NpgA-169590_42_5-6	-7.151	4.29	5.678	5655.38
NpgA-1201438_56_3-8	-7.15	1.352	2.07	5664.95
NpgA-315_72_0-3	-7.15	2.479	4.797	5664.95
NpgA-1260533_36_5-3	-7.15	1.786	2.337	5664.95
NpgA-50_03_3-4	-7.15	10.4	12.48	5664.95
NpgA-127373_66_4-4	-7.15	2.16	2.618	5664.95
NpgA-127373_66_4-5	-7.149	3.221	4.444	5674.53
NpgA-115_33_3-8	-7.149	4.227	7.247	5674.53
NpgA-1201438_56_3-9	-7.149	1.756	2.567	5674.53
NpgA-144689_24_7-2	-7.148	3.029	8.231	5684.12
NpgA-145158_71_0-1	-7.148	0	0	5684.12
NpgA-13209_41_1-3	-7.147	4.157	7.035	5693.74
NpgA-330784_47_9-9	-7.146	3.239	6.49	5703.37
NpgA-856866_72_3-6	-7.146	5.879	10.6	5703.37
NpgA-1672668_24_4-1	-7.146	0	0	5703.37
NpgA-67392_87_4-7	-7.145	3.672	7.901	5713.01
NpgA-1143532_39_1-7	-7.145	8.625	10.89	5713.01
NpgA-133454_47_4-6	-7.145	1.592	2.366	5713.01
NpgA-1338225_97_0-3	-7.145	5.466	7.318	5713.01
NpgA-156053_89_3-5	-7.145	3.46	6.135	5713.01
NpgA-127373_66_4-6	-7.144	4.683	9.422	5722.67
NpgA-2203_97_6-3	-7.144	5.988	8.687	5722.67
NpgA-30544_47_9-1	-7.144	0	0	5722.67
NpgA-960539_70_2-3	-7.143	1.425	5.739	5732.35
NpgA-68_88_2-1	-7.143	0	0	5732.35
NpgA-53_36_1-3	-7.143	5.691	8.531	5732.35
NpgA-516_35_8-8	-7.142	4.962	11.04	5742.04
NpgA-1194506_26_7-9	-7.142	2.609	3.647	5742.04
NpgA-313368_91_1-7	-7.142	2.114	3.228	5742.04
NpgA-71125_38_7-2	-7.142	3.606	5.439	5742.04
NpgA-1446261_44_4-3	-7.141	3.549	5.937	5751.75
NpgA-1893_33_0-6	-7.14	6.106	8.796	5761.48
NpgA-31430_15_6-6	-7.14	6.481	9.105	5761.48
NpgA-53_06_5-4	-7.14	1.999	3.232	5761.48
NpgA-83_43_2-3	-7.139	3.138	6.45	5771.22
NpgA-17230_88_5-2	-7.137	2.78	6.403	5790.76
NpgA-56995_20_1-2	-7.137	1.433	1.733	5790.76
NpgA-3801_06_7-1	-7.136	0	0	5800.55
NpgA-315_72_0-4	-7.136	1.131	1.374	5800.55
NpgA-3801_06_7-2	-7.136	4.253	7.126	5800.55
NpgA-79350_37_1-1	-7.136	0	0	5800.55
NpgA-302_22_7-1	-7.136	0	0	5800.55
NpgA-71125_38_7-3	-7.135	3.612	4.31	5810.36
NpgA-139755_83_2-5	-7.135	4.21	7.071	5810.36
NpgA-1056634_68_4-6	-7.135	2.395	12.25	5810.36
NpgA-50_04_4-4	-7.134	1.555	2.42	5820.19
NpgA-856867_55_5-9	-7.134	7.309	11.37	5820.19
NpgA-366789_02_8-9	-7.134	10.51	12.13	5820.19
NpgA-1177_87_3-3	-7.134	1.816	8.021	5820.19
NpgA-976_71_6-6	-7.134	3.642	5.936	5820.19
NpgA-23110_15_8-2	-7.133	2.953	5.936	5830.03
NpgA-1038915_60_4-6	-7.133	6.387	9.232	5830.03
NpgA-90357_06_5-3	-7.133	7.716	11.04	5830.03
NpgA-1346242_81_6-3	-7.133	2.416	3.995	5830.03
NpgA-23110_15_8-3	-7.132	7.049	10.56	5839.89
NpgA-3801_06_7-3	-7.132	2.183	6.969	5839.89
NpgA-1313725_88_0-5	-7.132	2.318	2.678	5839.89
NpgA-27848_84_6-4	-7.131	3.47	8.086	5849.77
NpgA-147511_69_1-5	-7.131	3.475	6.11	5849.77
NpgA-779353_01_4-3	-7.13	1.226	1.407	5859.66
NpgA-313368_91_1-8	-7.129	6.058	10.49	5869.57
NpgA-338_95_4-1	-7.129	0	0	5869.57
NpgA-55268_75_2-3	-7.128	2.582	8.516	5879.49
NpgA-879085_55_9-7	-7.128	7.05	9.94	5879.49
NpgA-94497_51_5-8	-7.128	6.758	10.07	5879.49
NpgA-330942_05_7-3	-7.128	1.431	2.078	5879.49
NpgA-83_49_8-4	-7.128	1.85	3.228	5879.49
NpgA-1513857_77_6-6	-7.127	3.538	10.41	5889.44
NpgA-133454_47_4-7	-7.127	1.908	2.744	5889.44
NpgA-1802220_02_5-6	-7.127	3.893	6.643	5889.44
NpgA-313368_91_1-9	-7.126	6.061	10.13	5899.4
NpgA-839712_12_8-3	-7.125	4.71	10.82	5909.37
NpgA-606143_89_9-2	-7.125	2.634	4.883	5909.37
NpgA-14484_47_0-4	-7.125	2.237	3.897	5909.37
NpgA-7759_35_5-2	-7.125	1.385	3.418	5909.37
NpgA-34661_75_1-2	-7.124	2.616	4.399	5919.37
NpgA-102625_70_7-2	-7.123	11.28	14.21	5929.38
NpgA-209342_40_5-1	-7.123	0	0	5929.38
NpgA-91_33_8-1	-7.123	0	0	5929.38
NpgA-83_44_3-2	-7.122	1.575	2.975	5939.4
NpgA-94497_51_5-9	-7.122	5.575	9.43	5939.4
NpgA-53_34_9-2	-7.122	2.295	7.366	5939.4
NpgA-150322_43_3-4	-7.121	2.249	3.458	5949.45
NpgA-95399_71_6-1	-7.119	0	0	5969.59
NpgA-19794_93_5-6	-7.118	7.913	10.68	5979.68
NpgA-960539_70_2-4	-7.118	1.868	6.896	5979.68
NpgA-26844_12_2-8	-7.118	2.908	4.479	5979.68
NpgA-107724_20_9-6	-7.118	1.964	7.561	5979.68
NpgA-7681_14_3-5	-7.117	5.584	8.461	5989.8
NpgA-99464_64_9-2	-7.117	2.674	5.565	5989.8
NpgA-879085_55_9-8	-7.117	6.582	8.989	5989.8
NpgA-59198_70_8-7	-7.116	1.735	3.014	5999.92
NpgA-1448169_71_8-9	-7.116	3.718	10.53	5999.92
NpgA-107868_30_4-2	-7.116	2.088	6.618	5999.92
NpgA-103577_45_3-2	-7.116	1.363	1.741	5999.92
NpgA-77_36_1-1	-7.115	0	0	6010.07
NpgA-50_03_3-5	-7.115	5.09	7.451	6010.07
NpgA-132810_10_7-3	-7.115	2.673	5.072	6010.07
NpgA-128794_94_5-6	-7.115	4.541	7.453	6010.07
NpgA-65847_85_0-4	-7.114	2.662	3.802	6020.23
NpgA-557795_19_4-3	-7.113	2.448	4.121	6030.42
NpgA-2628280_40_8-3	-7.112	1.889	2.822	6040.61
NpgA-209342_40_5-2	-7.111	2.042	2.357	6050.83
NpgA-115956_12_2-6	-7.111	2.397	6.17	6050.83
NpgA-1346242_81_6-4	-7.111	2.705	5.105	6050.83
NpgA-100986_85_4-3	-7.111	5.768	8.225	6050.83
NpgA-147511_69_1-6	-7.108	3.329	6.088	6081.58
NpgA-1242137_15_0-1	-7.108	0	0	6081.58
NpgA-2259_96_3-1	-7.108	0	0	6081.58
NpgA-26807_65_8-1	-7.108	0	0	6081.58
NpgA-1206161_97_8-8	-7.106	3.103	4.554	6102.17
NpgA-38194_50_2-1	-7.106	0	0	6102.17
NpgA-1802220_02_5-7	-7.105	3.269	7.051	6112.48
NpgA-144689_24_7-3	-7.105	2.793	7.493	6112.48
NpgA-161715_24_8-2	-7.104	1.576	1.989	6122.82
NpgA-59198_70_8-8	-7.104	10.16	12.61	6122.82
NpgA-138402_11_6-6	-7.103	1.556	3.657	6133.18
NpgA-10457_90_6-7	-7.103	2.135	3.066	6133.18
NpgA-242478_37_1-1	-7.102	0	0	6143.55
NpgA-116_43_8-3	-7.102	3.218	4.387	6143.55
NpgA-57149_07_2-4	-7.102	2.435	9.301	6143.55
NpgA-956104_40_8-3	-7.102	5.262	6.716	6143.55
NpgA-870281_82_6-7	-7.101	1.782	2.67	6153.94
NpgA-1260533_36_5-4	-7.101	3.831	4.864	6153.94
NpgA-1313725_88_0-6	-7.101	2.829	4.482	6153.94
NpgA-31431_39_7-3	-7.099	7.051	9.347	6174.77
NpgA-128794_94_5-7	-7.098	4.134	8.213	6185.21
NpgA-297_76_7-3	-7.098	1.901	8.69	6185.21
NpgA-1435_55_8-1	-7.097	0	0	6195.67
NpgA-920509_32_6-6	-7.097	5.938	8.937	6195.67
NpgA-864070_44_0-7	-7.096	3.301	4.214	6206.15
NpgA-119_41_5-1	-7.096	0	0	6206.15
NpgA-956104_40_8-4	-7.096	4.698	8.973	6206.15
NpgA-59198_70_8-9	-7.095	2.449	8.373	6216.64
NpgA-241479_67_4-1	-7.094	0	0	6227.16
NpgA-1000025_07_9-1	-7.094	0	0	6227.16
NpgA-115956_12_2-7	-7.093	2.996	4.905	6237.69
NpgA-1210344_57_2-5	-7.093	2.958	4.689	6237.69
NpgA-1242137_15_0-2	-7.093	3.643	5.175	6237.69
NpgA-608141_41_9-6	-7.093	1.486	2.597	6237.69
NpgA-4419_39_0-2	-7.093	1.883	7.448	6237.69
NpgA-1672668_24_4-2	-7.092	5.751	7.284	6248.24
NpgA-139481_59_7-8	-7.091	2.998	8.043	6258.8
NpgA-52128_35_5-9	-7.089	2.249	3.291	6279.99
NpgA-139755_83_2-6	-7.089	3.963	7.888	6279.99
NpgA-50_03_3-6	-7.089	1.276	2.079	6279.99
NpgA-53_16_7-1	-7.088	0	0	6290.61
NpgA-169590_41_4-2	-7.088	1.108	1.477	6290.61
NpgA-224785_90_4-4	-7.087	2.311	3.98	6301.25
NpgA-330942_05_7-4	-7.087	4.147	7.27	6301.25
NpgA-107868_30_4-3	-7.087	3.48	5.756	6301.25
NpgA-1492952_76_7-9	-7.086	2.49	4.193	6311.9
NpgA-31431_39_7-4	-7.086	5.983	8.867	6311.9
NpgA-976_71_6-7	-7.086	3.934	7.292	6311.9
NpgA-56995_20_1-3	-7.085	0.7962	1.36	6322.58
NpgA-866323_14_0-1	-7.085	0	0	6322.58
NpgA-118292_41_4-1	-7.085	0	0	6322.58
NpgA-113617_63_3-7	-7.085	2.103	3.979	6322.58
NpgA-114798_26_4-2	-7.085	1.599	2.975	6322.58
NpgA-19794_93_5-7	-7.084	5.142	10.82	6333.27
NpgA-71125_38_7-4	-7.084	2.537	4.848	6333.27
NpgA-90357_06_5-4	-7.084	7.818	10.77	6333.27
NpgA-147059_72_1-3	-7.084	6.49	9.167	6333.27
NpgA-27848_84_6-5	-7.083	2.168	2.973	6343.98
NpgA-27848_84_6-6	-7.082	5.331	7.833	6354.71
NpgA-242478_37_1-2	-7.082	3.971	6.795	6354.71
NpgA-53772_83_1-1	-7.082	0	0	6354.71
NpgA-171596_29_5-7	-7.082	3.66	6.615	6354.71
NpgA-81403_80_7-1	-7.082	0	0	6354.71
NpgA-129_03_3-3	-7.081	2.295	5.063	6365.45
NpgA-330942_05_7-5	-7.081	4.396	9.734	6365.45
NpgA-14605_22_2-9	-7.081	8.731	11.25	6365.45
NpgA-109351_33_9-3	-7.081	2.708	9.413	6365.45
NpgA-159811_51_5-2	-7.08	3.891	6.239	6376.22
NpgA-461432_26_8-4	-7.08	6.205	7.789	6376.22
NpgA-775304_57_9-1	-7.08	0	0	6376.22
NpgA-2628280_40_8-4	-7.08	3.245	6.397	6376.22
NpgA-147059_72_1-4	-7.08	5.527	7.684	6376.22
NpgA-426_13_1-4	-7.079	2.512	6.556	6387
NpgA-557795_19_4-4	-7.079	1.289	1.825	6387
NpgA-1802220_02_5-8	-7.079	2.916	5.27	6387
NpgA-1223403_58_4-4	-7.079	3.931	6.015	6387
NpgA-57808_66_9-9	-7.078	5.516	9.185	6397.8
NpgA-79_61_8-2	-7.078	1.879	3.077	6397.8
NpgA-417716_92_8-9	-7.077	3.603	10.38	6408.62
NpgA-1207456_01_6-5	-7.077	4.266	5.654	6408.62
NpgA-356068_94_5-9	-7.077	3.492	5.599	6408.62
NpgA-117_39_5-1	-7.076	0	0	6419.46
NpgA-83_43_2-4	-7.075	3.418	4.348	6430.32
NpgA-131_69_1-5	-7.075	8.078	11.01	6430.32
NpgA-57_91_0-1	-7.075	0	0	6430.32
NpgA-923287_50_7-9	-7.075	3.36	8.803	6430.32
NpgA-378_44_9-2	-7.075	6.997	8.463	6430.32
NpgA-920509_32_6-7	-7.074	2.226	9.192	6441.19
NpgA-130018_77_8-1	-7.073	0	0	6452.08
NpgA-245765_41_7-3	-7.073	5.61	8.377	6452.08
NpgA-81_23_2-6	-7.072	5.203	6.342	6462.99
NpgA-53_36_1-4	-7.072	2.398	3.875	6462.99
NpgA-301692_76_2-2	-7.072	4.039	5.743	6462.99
NpgA-145_13_1-1	-7.071	0	0	6473.92
NpgA-51333_22_3-5	-7.07	4.921	8.095	6484.87
NpgA-13647_35_3-2	-7.07	2.592	3.944	6484.87
NpgA-116_43_8-4	-7.07	2.306	2.597	6484.87
NpgA-491_70_3-1	-7.069	0	0	6495.84
NpgA-1306760_87_1-5	-7.069	7.268	9.895	6495.84
NpgA-1632006_28_0-8	-7.069	8.455	11.61	6495.84
NpgA-760937_92_6-7	-7.069	1.557	3.248	6495.84
NpgA-22071_15_4-1	-7.068	0	0	6506.82
NpgA-79794_75_5-3	-7.068	4.267	7.851	6506.82
NpgA-83928_76_1-4	-7.068	7.415	9.764	6506.82
NpgA-113617_63_3-8	-7.067	3.672	7.72	6517.83
NpgA-864070_44_0-8	-7.067	1.423	2.986	6517.83
NpgA-557795_19_4-5	-7.066	3.797	9.495	6528.85
NpgA-1346242_81_6-5	-7.066	2.561	4.721	6528.85
NpgA-147403_03_0-8	-7.065	2.356	7.976	6539.89
NpgA-107868_30_4-4	-7.065	2.12	3.532	6539.89
NpgA-117_39_5-2	-7.064	1.612	7.104	6550.95
NpgA-105102_22_5-2	-7.064	2.068	7.341	6550.95
NpgA-124858_35_1-1	-7.063	0	0	6562.03
NpgA-742_20_1-1	-7.063	0	0	6562.03
NpgA-57_83_0-1	-7.063	0	0	6562.03
NpgA-81_23_2-7	-7.063	5.534	8.108	6562.03
NpgA-50_35_1-1	-7.062	0	0	6573.13
NpgA-13647_35_3-3	-7.062	2.94	6.826	6573.13
NpgA-760937_92_6-8	-7.062	5.329	8.418	6573.13
NpgA-127373_66_4-7	-7.06	3.106	4.49	6595.38
NpgA-1018899_04_1-2	-7.058	2.237	3.234	6617.7
NpgA-2557_49_5-6	-7.057	2.331	3.082	6628.89
NpgA-139481_59_7-9	-7.057	4.111	6.629	6628.89
NpgA-53_34_9-3	-7.056	3.892	6.858	6640.1
NpgA-42017_89_0-1	-7.056	0	0	6640.1
NpgA-7681_14_3-6	-7.056	1.192	1.487	6640.1
NpgA-23110_15_8-4	-7.056	4.585	9.292	6640.1
NpgA-1524_88_5-4	-7.055	1.872	2.666	6651.33
NpgA-81_23_2-8	-7.055	2.18	3.579	6651.33
NpgA-1346242_81_6-6	-7.055	2.277	4.435	6651.33
NpgA-50_23_7-1	-7.054	0	0	6662.58
NpgA-81409_90_7-1	-7.054	0	0	6662.58
NpgA-356_12_7-6	-7.053	3.868	6.258	6673.85
NpgA-338_95_4-2	-7.052	1.701	7.206	6685.14
NpgA-125_10_0-5	-7.051	5.337	7.462	6696.44
NpgA-839712_12_8-4	-7.051	5.079	10.79	6696.44
NpgA-152_72_7-3	-7.051	3.394	7.301	6696.44
NpgA-224785_90_4-5	-7.05	1.86	2.963	6707.76
NpgA-57_83_0-2	-7.05	1.241	7.249	6707.76
NpgA-976_71_6-8	-7.05	3.984	6.416	6707.76
NpgA-603_50_9-1	-7.05	0	0	6707.76
NpgA-152_72_7-4	-7.05	2.34	4.855	6707.76
NpgA-603_50_9-2	-7.049	2.945	5.467	6719.11
NpgA-638_94_8-5	-7.049	5.223	8.055	6719.11
NpgA-53164_05_9-2	-7.049	3.315	4.825	6719.11
NpgA-1616493_44_7-5	-7.049	1.977	2.281	6719.11
NpgA-147511_69_1-7	-7.048	3.987	7.558	6730.47
NpgA-378_44_9-3	-7.048	4.467	6.694	6730.47
NpgA-610798_31_7-2	-7.048	3.064	4.843	6730.47
NpgA-107868_30_4-5	-7.048	3.65	6.772	6730.47
NpgA-50_28_2-2	-7.047	2.84	3.404	6741.85
NpgA-50_03_3-7	-7.047	1.847	8.237	6741.85
[truncated: 9,513 more rows]
