# Supplementary material for: CsdA-LaeB hub governs Aspergillus fumigatus virulence via FqC biosynthesis
Source: Research Square preprint supplement (doi:10.21203/rs.3.rs-6615529/v1), 2025-06-12
Supplement: Supplementary file 5 [file de1d1ddc49baf2af9ac57c47.xlsx]

## Sheet: Total ionic products
Supplementary Table 1 - Mass spectrometry data used for clinical Aspergillus fumigatus metabolome analysis.
	M/Z	Re time	A26	A28	A32	A38	A41	A55	A64	A66	A68	34	44	54	55	56	B14	B36	CEA17	D81	D83
1	232.073	0.557073	59445.7	47603.1	53268	70294.3	73574.2	69748.3	80119	73950.9	51514.2	47966.1	61484.8	56566.1	64316.8	48100.2	72050.2	63723.9	67360.3	65497.1	69652.6
2	441.103	0.559145	155299	106195	143159	144334	174152	121906	183318	231521	95393.7	98566.7	179223	111649	126760	94967.4	176164	186543	213488	172938	203119
3	443.132	0.56247	22388.5	1617.23	16271.1	22942.5	13896.7	17078.4	24882	24527.9	8195.63	6477.23	18234	11059.2	18072.4	1817.8	20818.1	24269.5	24172.8	14176.4	21194.4
4	442.107	0.562625	22882.7	23001	32298.4	23819.6	23968.1	25465.7	25892.2	41230.8	17569.5	15659.7	22350.5	13507.5	21827	15645.9	34475.1	40271.2	40810.7	35842.8	34209
5	419.161	0.562779	20771.3	19382.4	18359.5	10867.7	25315.8	19314.6	23082.8	28294.2	11521.1	13221.5	26734	10614.9	20574.4	6788.7	26606.3	23097.6	27177.7	30637.8	23131.7
6	269.126	0.563057	16180	14386.9	27000.1	15816.1	14507.1	8424.79	13604.3	13242.8	522.718	9877.56	18318.3	6776.49	5726.39	716.491	41725.6	21581.4	19302.7	14582.6	12393.1
7	210.098	0.576612	36675.9	35600.8	32615.9	39806.5	33188.5	29422.4	36470.2	35670.6	18496.9	20339.3	46818.3	21552.4	30541.3	27595	43331.5	34753.7	28426.1	30505.3	34696.5
8	299.149	4.99526	1823.12	16417	38031.4	38459.5	50484.4	2106.54	100995	58536.7	2585.32	24657.8	27030.6	25846.6	19984.6	710.38	27713	2215.11	0	2701.94	116528
9	241.165	5.45247	1230.19	126882	124633	103128	265892	3260.15	130861	91147.9	20655.5	126245	173981	158637	128004	11722.7	79660.6	26912.7	17065.7	11802.5	212626
10	284.142	5.48334	19691.8	11641.3	7900.08	69802.2	34191.7	189.381	30225.6	18289.7	51399.2	31860.2	35012.9	37711.2	45172.5	17686.1	17942.5	20888.4	26871.8	5499.96	30576.1
11	306.077	5.49455	21651	10838.7	11420.1	49320.8	24149.9	1715.33	22178.8	16314.3	42989	20753.2	15440.5	34744.7	38015.2	24372	7107.38	16078	8582.14	3907.52	14875.3
12	430.233	5.70385	34860.7	28441.4	39032.7	35235.8	36783.4	32398.8	24183	29043.6	35751.5	28365	22402.3	28642.1	35054.5	26988.6	21020.9	25050.5	22112.7	16555.9	13188.8
13	391.165	5.76996	41204.1	4505.67	40828.9	100911	25968.8	2220.12	22894.6	30750.2	54745.3	7247.28	11764.4	26851.3	17798.9	7135.07	25831.6	17232.4	6815.57	5219.65	15523.7
14	500.214	6.19594	24170.9	67493.3	76865.4	63595.7	68283.5	2378.64	67234.2	76440.6	161958	11060	13092.2	12749.4	7770.39	65794	88055.6	139213	82926.3	6172.8	44331.1
15	899.295	6.59636	127065	181564	274723	51797.3	42435.4	117722	55396.1	47969.5	28299.2	90482.4	94432	94993.9	95339.3	1799.99	89519.1	45944.1	0	78310.3	61648
16	928.276	7.1755	296480	325413	277813	332241	468662	349787	319182	295368	974579	280354	332421	354234	306169	15191.4	592997	649928	39590.3	123046	459681
17	929.262	7.17658	146748	159831	122908	150967	210916	160459	132095	147969	478673	133906	153467	163552	147668	2880.03	290250	317137	7934.05	67720	230675
18	454.1	7.65787	37168.1	48284.3	101341	48724.9	180754	4769.32	162845	70132.4	98015.9	52455.6	51794.9	77547.3	57144.7	143411	60926.7	113447	112902	6115.29	52516.5
19	876.363	7.67587	20890	17067.1	21435.6	57180	174334	94976.5	186385	10564.1	56999.7	1331.71	15802.6	52495.6	22706.2	590.869	15553.5	118525	0	0	35900.1
20	875.354	7.67984	45154.4	41307.8	57818.4	105258	377800	214717	454839	55859.3	157606	26677.1	51924.4	100656	58581.5	0	49444.8	319758	0	1097.21	99734.3
21	853.389	7.67984	11598.9	20527.4	26295.4	48869	157855	148137	86410.7	36564.1	68983.2	20864.2	24692.6	70686.4	49012.6	0	26561	119598	0	433.08	52209
22	943.264	7.69528	23160.1	15647.3	33812	53872.5	65166.3	31259.9	54210.6	28453.3	134537	19103.7	43347.6	49951.1	40570.3	1267.71	53697.9	121883	6544.87	3006.49	19703.9
23	500.21	7.6979	72468.7	50030.5	53189	47263.7	51229.7	3852.87	47014.7	51260.9	91906.5	58769.4	6308.97	56897.1	7971.83	30593	62628.8	87253.1	41524.2	3410	22270.9
24	942.266	7.70293	48930.8	36862	68610.6	95826.4	109556	68917.5	100275	67316.5	249617	60197	102755	101401	81743.3	1997.68	103456	231887	3425.45	10865.1	64502.1
25	243.06	7.94288	24927.2	69084.2	8336.73	4019.16	61884.9	208.66	41633	851.952	3395.81	22265.1	28294.9	19228.6	27531.2	332.098	0	25033.5	1078.23	1110.1	36802.5
26	546.146	7.9466	7366.36	94096.2	5468.99	0	97387.5	0	59001.5	0	595.093	23865.1	47384	29400.9	23138.4	0	0	37504.9	0	0	67144.9
27	310.079	7.95783	33920.4	116041	22504.2	4744.04	102369	193.101	61857.3	529.653	5029.34	39361.1	61674.4	28058.6	53765.8	396.707	13973.3	53486.2	966.505	543.227	75219.3
28	554.12	7.95989	35680.6	183841	6894.01	345.697	150243	0	110909	0	3142.96	37025.8	121109	48897.3	66523.7	0	162.322	81019.9	182.082	0	134353
29	309.093	7.96104	258032	651855	136717	18389.3	640984	1126.01	424349	12556	26619	230243	438872	289869	331694	1695.61	4687.7	356757	1254.94	3434.84	471852
30	736.16	7.96145	153586	566675	65384.8	3281.92	446166	0	316362	0	1532.31	152480	322274	200867	205508	0	198.57	212236	0	0	357746
31	357.082	7.96443	59053.4	150974	28871.3	16276.7	155734	1265.28	88213.7	2217.4	3589.01	66566.6	118701	70341.3	76548	920.72	2850.24	82361.9	1451.43	4195.39	80018.3
32	291.083	7.96487	46848.6	132186	27333	10219.4	131359	544.113	77690.6	979.03	5629.21	63990.4	114667	65899.3	77289.3	1638.14	2534.33	73924.8	2212.43	1568.43	81879.3
33	379.079	7.96585	288687	684444	175470	46044.1	592538	164.098	475098	12926.1	35376.1	276054	474859	335513	363412	3112.35	4281.71	406146	184.55	4937.65	513929
34	738.15	7.96644	31141.7	113005	11345.8	1185.98	87721.9	0	70132.6	0	0	22565.5	75876.3	38394.7	48774.9	0	0	42105.1	0	0	76929.6
35	735.143	7.96728	409863	1.51858e+06	166257	20606.9	1.19443e+06	919.118	850923	1978.15	9750.42	401855	881353	491596	581372	0	0	596718	187.541	1611.36	947623
36	737.135	7.96728	107930	407306	47040	4523.96	313505	0	229493	0	3229.73	106184	240216	151262	156516	0	0	155821	0	0	266593
37	420.137	7.96782	37176.6	100642	19474.6	4113.18	74765.6	0	61566.6	670.474	785.146	25927.5	55592	36435.4	60614.6	2446.18	1429.28	53691.3	714.39	0	60442.6
38	380.052	7.96782	41490.6	112263	23768.6	3906.48	114849	0	93813.8	251.33	9201.57	56650.2	82755.2	66014.1	70065.3	387.447	1530.32	64353.9	245.204	462.568	110761
39	381.053	7.9774	11851.8	79426	12457.1	7034.9	71625.3	229.953	53049.9	1010.58	2543.4	24542.1	30855.3	24524.8	41506.3	420.444	0	33373.7	891.267	793.896	40329.1
40	286.07	7.97788	75121.4	102731	73545.5	18063.3	114349	707.131	89505	2632.11	5261.07	82186.1	131275	65522	60441.8	168.178	868.244	105559	185.531	1828.76	82815.8
41	498.184	8.23793	44096.2	50470.6	91787.6	63198.1	34195.3	1688.32	23398.2	59514.8	101682	10429.9	12210.2	14168.6	9554.41	58297	68883.5	41515.9	60626.4	10165.3	26862.4
42	396.176	8.42681	14240.8	93602.9	107396	84564.3	66093.8	4164.89	4403.38	79989.3	66139.5	58563.8	61603.4	95796.6	91918	70608.2	152385	102797	157941	25683.5	109292
43	464.177	8.57053	121602	18538.4	81332.1	164394	66848.9	187.622	96034.7	60255.4	87425.5	57899.1	53570.2	67477.6	51863.6	2786.92	64921.2	39792.8	2800.18	1560.93	51824.6
44	462.2	8.57062	2.52204e+06	405662	1.59901e+06	3.08679e+06	1.28412e+06	32847.6	1.74264e+06	1.48082e+06	1.79705e+06	1.28139e+06	1.24489e+06	1.38893e+06	1.10926e+06	198216	1.21047e+06	682851	119375	50522.7	920974
45	463.197	8.57135	704301	104043	469828	866499	353824	4478.51	498657	401107	542528	354265	370816	392055	318220	54854.1	304051	186801	18979.4	9992.12	265477
46	945.274	8.58774	326632	15412.2	197418	397503	106520	3406.89	178709	142139	218966	112410	116753	148911	121511	10642.3	133554	61744.6	4541.13	195.881	75231.6
47	946.278	8.58827	191455	7539.69	97211	196914	53772.2	335.281	104647	89096.8	110152	65836.6	66025.7	72096.8	68085.6	2892.7	69401.4	23881	2807.16	0	51181.4
48	444.175	8.58831	1.11765e+06	201756	741447	1.39444e+06	581507	8695.68	796573	618712	794875	505399	504060	597400	513246	85141.8	527079	310330	53150.1	13568.8	460544
49	369.225	8.59804	704.135	17270.1	25145.7	2651.43	67972.2	2288.82	29606.3	80108.6	12060.2	22459.8	37337.3	34057.1	19771.1	4963.9	16890.5	21856.6	2972.81	2384.01	47689.4
50	445.158	8.59896	312696	56004.6	221398	403966	168912	2302.63	105950	181331	228769	157039	119390	175923	98641.7	14784.8	142758	85932.9	7325.31	2801.85	135201
51	367.226	8.60597	2825.05	511666	723591	124109	1.83425e+06	107209	1.05346e+06	2.35424e+06	618789	580542	1.09518e+06	1.01762e+06	689212	95091.5	436880	436880	92115.2	59774.2	1.67555e+06
52	368.238	8.60598	629.68	155599	183689	38620.1	476972	33005.1	256988	622178	160731	125623	305907	253105	190959	18449.3	112968	125952	18078.5	16718.7	445382
53	484.172	8.60645	243396	74549.2	159650	247985	136757	15412.4	167443	141009	160069	147135	136737	144263	149561	199760	160449	94332.1	141068	48334.2	113534
54	404.13	8.72188	114968	21202	73739.8	130791	50571.7	1986.36	84842.1	48243.5	85702.4	47675.5	62766.2	76707.5	54775.6	8631.61	52492.8	29248.3	5513.66	3901.31	52614.6
55	403.123	8.72199	429955	103618	318381	544820	229413	9892.12	362972	266637	332456	235983	219649	305702	285232	51074.2	208130	141509	19267.7	12088.8	224133
56	542.24	8.88096	153997	254300	475901	161352	136795	28315.3	196548	215167	436309	46802.9	33286	43768.4	36258.8	116712	466252	160979	102689	17478.2	109485
57	543.229	8.8848	54389.8	88486	163533	52149.7	40068.2	4201.8	75266.1	62180.3	144356	13779.1	11699.2	10815.8	10202.9	33577.8	147886	36027.5	31763.5	6002.43	36097.7
58	345.144	8.90723	38879.1	4748.09	49598.2	149294	39942.7	317.231	49507	33312.1	44124.8	29083.8	31588.6	41090.4	18106.5	6987.48	29441.5	13161.8	3053.52	384.056	26783.4
59	309.213	9.28493	533.233	77644.2	211772	44776	712503	1184.41	266366	507221	281994	229049	425561	327479	238534	9526.51	107549	219574	3415.52	5341.78	386744
60	396.171	9.29895	11506.3	52628.5	85799.3	25262.1	82858.4	4416.47	3943.97	67573.1	91037.9	29952	37634.6	69956.3	46945.5	108181	85739.2	56302.4	170603	3809.56	56371.2
61	429.166	9.51803	391461	14237.2	151244	252270	65529.4	30790.8	141502	56135.9	43794.2	25445.5	10107.3	17856	14753.2	43788.6	72526.2	15569.3	78642.1	20599.5	47646.6
62	448.169	9.52385	253415	8481.3	89434.6	143813	35427.6	11405.1	68224.8	39079.7	27535.7	6047.98	4943.36	12161.2	9633.52	44870.4	42847	5276.28	54534.8	15057	28632
63	447.183	9.52583	1.5133e+06	65998.1	513213	915222	259225	138712	521727	193195	174003	101056	85087.8	108438	99735.5	243460	255122	64884.9	296068	88873.2	152523
64	446.188	9.52797	5.31714e+06	271355	1.90219e+06	3.30274e+06	941828	481132	1.82339e+06	700746	664016	428626	303673	437417	352041	841283	966772	253050	1.01261e+06	310394	520536
65	428.167	9.53359	1.45839e+06	84842.3	529503	916244	286912	143624	522145	192359	92213.3	114671	84932	106525	107190	188228	241597	77544.5	241294	92226.8	174744
66	913.292	9.5344	1.11277e+06	9169.97	386001	633800	110724	49713.8	302845	87580.5	52299	24709.7	6615.73	15720.5	18536.4	136432	138766	10661.1	159814	20779.4	56834.6
67	468.178	9.61738	492488	60368.4	275620	353062	137480	64476.6	246513	104830	75165.3	60537	38989.5	49370.9	54333.8	145447	153706	69336.8	149202	52132.8	112856
68	469.171	9.6338	142298	19658	70750.6	99218.6	27501.4	22114.8	58665.3	28244.9	24736	13505.6	11253.3	15241.1	10260.5	35312.2	36765.5	12583.8	31808.1	11053.4	21500.3
69	555.297	9.66217	28611.7	11504.1	14629.1	18111	30958.9	4803.04	38967.3	31600.9	22031.9	63766.1	88343.4	104732	92954.2	7251.76	34660.7	23010	9975.04	4966.25	30922.3
70	911.275	9.74403	534421	70727.4	350936	566325	197984	434.611	365267	260259	179848	161062	157075	199533	159951	29258.7	179951	94358.4	5710.58	476.234	204543
71	467.163	9.74563	64450.2	48610.7	87652.3	89678	56698.2	5430.61	94703.6	76868.7	33892.9	51596.8	61054.1	63237	53225.9	20855.9	69900.1	53179.1	5728.46	4700.95	65618.9
72	445.184	9.74638	919263	246515	684982	1.08046e+06	536603	29273.2	756569	544716	611258	457356	460162	567347	467477	120034	457809	306576	55095.3	32437.1	480919
73	482.09	9.75767	76917.9	30919	78179.4	56025.4	29494.3	2040.44	52122.5	60411.7	38000.4	44378.5	48534.8	40451.6	59831.7	6646.28	65664.3	22694.7	3522.13	1764.54	42521.2
74	427.147	9.75804	427052	136477	325144	463468	263842	18933.2	366845	300604	307866	251792	247990	288422	276437	79485.5	245647	165334	39919	14112.2	240912
75	466.151	9.75804	269575	189005	277277	316256	252638	19615.9	279322	255976	226076	188078	199000	223749	237224	84993.5	222656	190246	56090.9	27631.1	262613
76	444.18	9.75828	3.0733e+06	855610	2.29109e+06	3.54838e+06	1.89823e+06	122597	2.51465e+06	1.89417e+06	2.05871e+06	1.66146e+06	1.59885e+06	1.92652e+06	1.66232e+06	445538	1.59098e+06	1.03122e+06	212629	134436	1.59248e+06
77	426.17	9.75854	1.44001e+06	484139	1.13736e+06	1.67962e+06	991304	60459.7	1.16554e+06	1.03672e+06	1.06484e+06	828241	888501	995416	899304	251842	833634	610361	123634	79148.4	867335
78	909.289	9.77525	1.83194e+06	295355	1.34942e+06	2.06359e+06	777946	6954.83	1.35707e+06	1.13487e+06	860270	892190	843323	977665	866441	70016.9	862760	443497	22979.1	6245.25	815676
79	910.292	9.7762	1.05881e+06	188452	787409	1.18945e+06	489411	1391.61	792386	651293	492203	476019	424072	586154	498329	37812.4	464405	263540	497.464	1588.33	434165
80	551.226	9.78072	128247	55495.2	84029.4	117255	68025.9	1562.25	107371	83846.6	61685.5	75981.2	53014.3	100481	76919	27224.8	84620.8	51257.4	6851.63	4271.21	43829.2
81	507.165	9.79238	77310.7	33183.3	85226.6	82858.3	58774.4	3619.17	69673.6	77761.8	66873.7	59219.6	72361.8	64034.1	36080.1	18386.7	59173.3	54249.3	5006.57	4324.97	73757.5
82	554.185	9.79388	142798	95189.7	149523	142801	130000	12659.6	130852	123699	110209	140394	119817	131966	115616	59455.1	121440	82140	28619.9	13622.1	115528
83	375.111	9.85929	14581.8	37457	11306.4	18457.8	279019	8559.49	8554.36	74069.7	679892	8732.44	15798.6	4698.15	4351.69	94812.1	33346.4	18332.9	78287.9	7778.12	38124.1
84	436.141	9.86421	22404	11809.7	32047	18735.3	28355.2	0	44752	24654.8	14818.2	20525.4	20817.7	43375.2	31345.4	32873.5	16457.9	56356.6	43863.1	1850.92	22638.4
85	458.181	10.108	34276.1	836.522	20223	37164.9	13257	343.511	29227.5	26330.3	25263.1	21172	24763.7	34209	23567.6	4408.06	21416.6	9327.04	1110.48	544.091	18283.4
86	476.188	10.1147	96388.9	14019.2	68846.6	119392	51176.6	2301.93	90350.6	78154	83518.9	64361.6	94443.5	93436.8	99201.1	19502.4	76518	48446.9	8895.99	1611.06	53324.1
87	382.172	10.1598	23967.3	43106.3	33528	77291.3	37185.8	5539.99	12730.8	18425.4	110577	55832.4	73226.2	56925.6	43229.4	91143	48355	20493.1	74950.1	11343.9	45718.8
88	525.252	10.1872	49615.6	63391.9	44243.2	57926.4	54588.9	54353.2	44153.7	52895.5	49180.3	43321.4	57406.9	49619	58565.3	43828.7	38292	50060.2	49223.5	54372.4	60643.2
89	381.18	10.635	74536.3	260101	246505	300299	96015.3	4091.03	3098.88	204906	233593	135816	170180	249572	203924	259436	361871	229556	390126	48552.3	229364
90	297.661	10.6386	2024.91	79472.8	51430	82682.8	41334	3512.18	979.964	64872.3	22586.3	37860.6	44362	40203.6	29888.8	44665	50703.6	51565.8	56421.8	22167.6	75022.5
91	402.175	10.6413	3971.67	307798	285811	299911	121844	2551.15	3209.59	266010	243455	136095	198162	274985	218551	260891	377929	249509	430952	57101.3	269877
92	782.339	10.6439	0	229231	207592	242994	47169.9	0	0	218128	150663	66469.5	118571	224888	162533	239512	419081	191875	457803	18401.5	217872
93	380.2	10.6468	5072.45	1.0161e+06	936930	1.08672e+06	397288	417.539	4890.5	920881	855465	491082	684157	996458	797497	949292	1.49614e+06	946081	1.53578e+06	210793	943020
94	781.339	10.6468	0	498711	382227	460104	91542.3	0	0	416546	317927	173576	257723	430925	302384	426958	816644	397342	866736	36040	426755
95	783.328	10.6475	1020.25	45578.5	46606.3	69541.1	13503.8	161.02	0	59587	42872.9	25050.5	40094.7	71493.1	36593.8	60667.9	92490.9	50393.2	123565	3501.92	60959.1
96	399.155	10.6773	974.792	53070	39919.9	30599.2	9218.81	622.076	1072.28	47828.6	20547.7	12343.3	30442	55214.4	27126.6	28726.2	25236.1	35823.8	68424.4	1713.96	45051.6
97	405.164	10.9167	29324.2	18462.6	38938.7	43444.2	59000.3	891.263	42417.8	36200.9	84270.8	24806.8	34354.9	26189.9	21247	18514.2	46319.3	55274.1	27032.1	22480.4	10698.2
98	531.249	12.0257	35879.9	23200	36163.1	42308	29744.6	17737.8	32123.6	34833	27982.6	26840.3	20172	29866.6	35579.5	25609.6	33365.4	25615.4	14489	42527.4	38052.4
99	570.259	12.2657	62217.4	53598.7	79815.1	79748	57385.2	50178.4	61036.2	56407	65732	32689.4	47716.9	56773.3	67125.1	75372.4	66131.8	54995	63464.3	52844.2	47319.3
100	274.27	12.3096	70185.8	50966.7	66445.1	85910.7	60683.8	61942.4	87334.6	77027.4	84940.4	97985.9	103954	96756.9	124559	105683	98608.4	94001.2	74419	68895.9	78949.5
101	586.257	12.3103	81894.7	69153.9	100298	225696	20858	10929.9	21209.8	21137.7	74922.5	24291.2	13811.4	31176.2	23261.2	225736	96307	23827.6	202640	46062.9	24168.4
102	585.243	12.3183	306940	254490	369123	969753	49265.5	6649.21	38774.1	78060.1	264544	91770.4	58550.7	106808	87618.8	1.03206e+06	408056	70560.6	798414	122660	96936.6
103	584.258	12.3277	903585	716210	1.02441e+06	2.74723e+06	139760	23860.7	127521	214775	786879	263751	175436	336719	229242	2.89803e+06	1.18057e+06	198216	2.39336e+06	378236	289031
104	318.274	12.488	65887.6	34703.8	61470.7	66789.9	52351	50408.5	50385	58556.1	88679.6	75416.9	66428.3	85850.2	91640.8	87877.4	62191.9	65748.8	64759.7	38187.4	83042.3
105	389.166	13.2852	31702.9	23677	32294.9	23597	153373	527.799	71950.7	16131.8	16812.2	45355.3	66544.5	78098.6	70698	13529.3	21074.2	43828.2	20610.5	3849.3	42144.1
106	598.288	13.5855	154299	52631.2	249370	782847	44338.8	0	59509.4	35498.3	133211	40474.9	32190	55218.7	48830.8	567303	207662	71317.7	631241	39551.8	40766.8
107	438.166	13.863	26642.1	20041.5	26739.7	14777.7	26631.5	22968	28214.8	33555.6	23411.7	28726.7	19602.5	38064.3	25950.6	30724.3	31319.8	15192.1	20056.1	32052.6	29684.7
108	437.178	13.8779	148442	108187	110648	108030	107471	118694	123041	145237	129665	124035	127804	150865	160787	136530	152448	118716	78296.2	165638	107840
109	415.185	13.8892	35537.2	18007.3	31172.6	20096.4	43253.9	29636.4	36690.3	40551.1	24787.6	27515	22738.5	39374.5	44749.5	50311.1	42439.9	49613.2	18357.4	52948.9	29685
110	453.146	13.8958	154856	152573	150585	146838	110955	149681	138045	158038	81545.6	127434	138957	158771	176693	171118	159209	134856	109047	182887	127714
111	455.187	14.0367	53064.1	18034.5	36447.5	45307.1	112696	13027.3	97597	15846.5	25970.8	57346.9	65828.3	91650.4	82538.6	23386.9	43141.5	54587	21119.2	23626.6	33643.9
112	302.267	14.491	11287.1	4893.18	12588.4	2214.6	13153.4	6666.85	21480.3	12480.8	8923.83	36197.7	34797.9	44707	35301.9	36830.2	22704.5	10490.4	16404.5	8257.22	26294
113	467.283	14.9731	21428.9	49541	20472.8	2493.25	31356.8	2866.95	30417.1	37728.6	38443.5	41245.3	54885.9	52135.7	56632.2	12397.7	22117.9	41641.7	7343.54	2007.94	42900.3
114	427.2	15.2569	84134.8	103974	137088	155284	340328	791.166	192793	70607.8	79596.6	61162.3	102295	119184	102027	94180.4	99225.6	187391	104225	17948.9	153043
115	459.241	15.2719	241238	231268	272805	304022	613759	3033.62	374266	175290	212210	206463	213720	269057	244609	228539	246898	337464	239655	48515.9	353227
116	460.232	15.279	64165.9	38830.4	66858.1	76142.1	177318	0	104422	35761.1	51977.4	59415.2	59930.3	69641.6	55085.4	43223.2	64143.9	70863.7	60017.6	13080.5	78640.8
117	481.207	15.288	575428	494683	627185	727772	1.18347e+06	11263.1	798800	421356	452006	512802	482357	591508	563758	461411	529278	783060	551969	139748	718089
118	482.214	15.2886	171376	139455	192967	196001	349859	2195.59	233212	128954	130356	141551	117629	168752	139168	111952	150625	173241	165883	32206.7	195204
119	293.142	15.3296	50693.4	38111.1	40800.1	52248.3	109186	384.923	71394.6	21860	43550.6	39577.6	13760.4	44959.9	20933.8	43455.9	23789.4	48838.8	20389.4	7285.39	47954.8
120	497.34	15.8241	207275	24901.4	127967	72020.2	134383	31262	156274	117578	88714.5	129122	121714	130192	129122	33192	120412	60871.6	12876.9	2950.26	28463.8
121	607.256	16.1404	16292.7	36067	20143.5	361.343	15044.5	675.675	15781.7	30738.4	19396.5	44494	43948.1	57153	53925.3	5051.35	17623.5	23096.7	6936.76	197.252	47076.1
122	509.3	16.1431	411911	580872	418602	0	496743	11615.3	327499	512988	542019	742207	789632	867997	826494	106324	297164	489834	77816.6	21124	555916
123	592.302	16.1478	84198	89156.5	75690.5	0	84364.7	2908.14	65691.2	100445	95566.7	133717	150730	163979	150506	6958.55	63419.2	102544	21918.9	5601.54	116427
124	510.292	16.152	143940	176496	147464	1230.52	161110	6742.98	113256	177224	200576	271547	277734	311990	256857	19408.2	107390	163197	30813.6	10564.7	193075
125	591.3	16.152	212151	283225	210860	158.572	248569	5490.41	186412	275348	296856	375206	377706	449603	397337	55024.3	156798	269363	52151.2	21869.8	279309
126	511.289	16.2426	57203.3	86278	54264.7	0	61171.5	2108.31	53376.4	61392.6	87376.9	94617.9	91260.1	122691	89329.7	18881.9	57720.1	64455	19906.3	2860.39	75377.5
127	540.412	19.2297	36863.4	55225.1	37223.4	44468.5	46117.1	42242.1	24456.7	52297.9	41120	22914.3	17258.6	43168.4	51262.7	14844.6	38123.9	40756.3	26698.1	25537	20362.6
128	374.274	20.6987	281258	327938	282750	282620	317793	335954	345872	277085	317384	263721	253042	306700	307605	233331	318207	298492	291525	252939	234524
129	352.319	20.711	156649	213523	116416	201828	236208	184888	221646	164997	201426	188812	174261	183299	219208	130613	184224	179102	178204	165925	138843
130	273.17	21.1942	11254.1	33657.7	43425.1	24885.9	29964.1	35695.6	43323.1	42440.2	24165.1	27905.5	21675.9	28273.4	30778.8	13221.8	20472.8	32027.2	27931.1	22489.4	17253
131	331.275	21.2517	99087	76839.6	83838.8	80163.2	92964.9	129978	72617	95017.3	110228	62567.2	73732	91836	88904.1	93839.3	85979	91334.2	79245.6	122302	79796.1
132	353.269	21.2835	243255	287735	234657	161052	140520	93379.1	208017	269004	163423	237246	249566	310996	253813	146496	128415	256718	210048	306311	305513
133	282.275	21.42	248804	199607	285958	212729	218107	305775	188390	234557	121347	210622	169100	211435	251454	219116	221506	239508	171050	214232	177397
134	379.318	21.4451	27887	50175.3	95063.8	39634.2	45705.9	238524	44039.9	42017.6	126082	28683.2	28463.3	191688	222615	98867	51967.8	71100.2	63789	152275	176775
135	304.234	21.662	49427.5	65140.4	67064.4	52455.7	40650.6	118573	30839.6	41492.6	45279.5	31434.4	54323.1	55414.9	42383.6	32507.4	48465	57066.8	16516.7	46581	78427.4
136	303.218	21.698	132112	197604	179879	110210	164066	285837	61321.9	164837	154091	142706	138301	176105	173327	143908	147530	136619	87828.9	192365	204914
137	281.233	21.7183	192509	335070	320867	182745	200606	553747	138041	239707	237266	233093	227172	342752	336878	189505	230430	242792	133900	279857	290260
138	376.299	21.987	149544	246361	183638	140551	172460	306962	144016	186124	256822	173342	200319	205506	261590	130541	201008	188152	137320	227821	179194
139	481.334	22.1146	30013.3	64563.8	65495.4	40596.5	21613.3	92856.7	39890.1	44230.7	61420.7	41590.4	39550.6	63211.3	68778.3	42086.2	44049	65281.7	27236.9	47805.5	47680.9
140	456.449	22.2391	9868.08	2448.73	3626.79	7523.5	8205.94	8286.71	6498.7	8921.43	13324	70063.9	43649.5	59108.7	70824.5	54668.1	6182.66	7859.74	5169.48	10671.9	11871.6
141	334.281	23.0759	18194.7	135136	80058.3	77365.3	98978.8	70476.7	97717.1	60928	118760	88732.6	18094.6	73569.1	51362.6	45256.5	63448.4	84137.5	48490.4	101161	72433.3
142	356.281	23.2898	29698.4	73037.7	91661.5	40079	52654.1	114658	37164.5	40244	65116.9	60760.3	58877.2	112578	90901.2	47665.6	34974.5	60801.9	27404.2	129364	44797.3
143	283.25	23.3736	76400	106172	128124	70425.6	49079.8	330197	48927	58162.6	115098	48534.3	66026.3	125013	97371.5	81015.6	83366.6	107800	64210.3	146560	86600.5
144	311.272	23.8049	36023.2	86230.1	56686.4	58971.5	47512.4	50733.4	47573.4	65673	60359.2	39040.4	43021	49347.8	50806.1	32273.3	42854.4	48487.2	49262.3	45189.5	37260.2
145	310.3	23.8157	210707	352933	279945	277452	265119	298742	314151	298575	338323	284108	249456	270708	234098	173942	209835	248209	267546	218217	172782
146	381.287	23.818	130229	121052	125569	114289	124095	235236	121419	132479	160506	107534	134577	84662	91800.3	92133.2	102266	135977	92958.6	132872	117908
147	523.33	24.3431	79304.5	130133	125428	122828	104374	155664	104422	98229.2	122699	72726.7	71496.6	128909	115824	102815	103521	120177	101060	115076	90041.3
148	337.324	24.4517	126368	192644	132658	138374	163285	137278	168284	113116	175433	171020	143029	119982	158039	115102	111245	140551	140116	123260	99286.6
149	336.317	24.4543	478975	776594	554784	571879	691599	641377	650332	568408	717301	688150	637048	518623	602029	410355	471670	612384	616383	546400	473454
150	358.308	24.4689	157146	258263	209169	149951	156172	174235	225915	219625	256297	218066	197219	174585	208302	170328	155853	206297	195531	93080.1	150487
151	295.283	25.1052	3180.01	21920.2	60925.6	4907.96	9078.37	79125.5	10076.6	12174.6	18168.3	9631.43	1283.35	59398.8	58263	26290.5	6710.41	10781.9	22385.9	63750.6	58080.9
152	512.497	25.7703	99699.3	51030.2	109368	123675	115581	126909	142466	176619	213836	403892	225195	284382	385325	372377	146468	152838	126410	129916	199697
153	429.242	25.8132	22585.7	43134.8	39643.6	57333.3	37154.9	38161.9	48236	43433.7	49296.4	35261.3	39118.5	43034.7	38369	56954.2	42230.4	45610.9	18756	41024.5	37881.4
154	436.335	25.8141	32842.1	30009.8	15986.2	25407.6	28782.2	14945.5	26365.2	24726.3	32112.1	22429	31834.6	25878.3	24709.3	25796.6	33011	24536	26841.4	29493.1	28353.3
155	391.27	25.8329	76040.4	128611	88684.9	101390	110633	111227	83784.5	92926.4	105932	109323	87695.3	106683	122990	90926.6	111585	115542	94579.4	114663	88191.6
156	413.249	25.8335	307199	333011	318813	294039	285039	297048	257488	284558	280347	226572	276673	281456	303267	271503	288714	278700	252537	297425	279328
157	414.255	25.8347	36043.6	83209.2	65028.9	82416.1	59358.4	78743.1	40510	76149.6	75179.3	47106.2	62467.6	76955.5	52489.3	56886.2	77567.5	58343.6	69475.9	65197.1	75370.2
158	339.357	26.1742	2.5903e+06	3.19923e+06	2.88408e+06	2.86957e+06	2.88874e+06	3.15338e+06	2.73895e+06	2.65577e+06	2.86956e+06	2.62148e+06	2.68266e+06	2.65453e+06	2.8579e+06	2.31811e+06	2.55945e+06	2.65584e+06	2.67761e+06	2.77466e+06	2.46822e+06
159	338.331	26.1746	9.9432e+06	1.23192e+07	1.15443e+07	1.14793e+07	1.15657e+07	1.23321e+07	1.15141e+07	1.0657e+07	1.16428e+07	1.08328e+07	1.06466e+07	1.09266e+07	1.11178e+07	9.29234e+06	9.94371e+06	1.0813e+07	1.08049e+07	1.07734e+07	9.51591e+06
160	340.3	26.1795	173075	120966	134853	184481	185476	191695	145746	175074	178895	134866	179001	187432	133611	108561	228487	137355	164390	138834	87151.1
161	360.3	26.1883	2.30901e+06	3.26368e+06	2.73589e+06	2.58157e+06	3.03114e+06	2.94737e+06	2.95111e+06	2.68324e+06	3.01021e+06	2.78174e+06	2.69484e+06	2.68884e+06	2.73326e+06	2129688	2.42527e+06	2.62315e+06	2.63517e+06	2.55197e+06	2.09396e+06
162	361.316	26.1885	604652	808518	727815	704777	764049	726021	757298	682801	786652	658611	659748	631592	725192	539843	620153	672408	677346	622276	572807
163	676.685	26.1923	1.09907e+06	202025	1.39572e+06	1.45278e+06	1.69745e+06	1.68779e+06	312841	1.5288e+06	236811	1.79084e+06	1.52086e+06	1.33497e+06	215095	1.19235e+06	1.36085e+06	1.74185e+06	1.70081e+06	90417.7	30954.2
164	362.294	26.1923	24105	87643.1	36328.2	69310	84838	51792.2	55687.7	71709.4	83849.2	60528.6	65613.4	84238.3	63379.6	42007.8	63822.4	51752.1	70129.2	39804.8	29134.4
165	675.694	26.196	2.3097e+06	3.63182e+06	2.49629e+06	3.04479e+06	3.29644e+06	3.97563e+06	3.90387e+06	3.32149e+06	4.12692e+06	3.57745e+06	3.06065e+06	2.76674e+06	3.01838e+06	72681	2.72596e+06	3.47095e+06	3.46569e+06	238231	2.69321e+06
166	677.674	26.1982	286113	408480	364409	342719	376044	97341.3	507045	364080	318748	292201	353131	281552	294307	249811	223263	405699	348266	315069	141858
167	376.279	26.2029	125210	184641	143358	155337	168627	170855	187675	147760	170752	129523	166649	171587	173579	145573	162563	145378	107513	145417	136873
168	341.354	28.3043	47240.9	57084.3	54103.7	34507.5	43340.3	27007.5	45814.4	21841.2	40191.9	56137.3	31286.3	49241.4	43393.1	38955.6	46103.7	36937.5	52517.2	45423.5	18165
169	366.379	28.4467	461210	620093	684112	630418	572181	926810	579387	541507	676882	525093	521623	659256	649497	624366	459501	571202	715252	718499	533076
170	367.371	28.4644	105604	145272	183450	156341	162470	256056	154597	150734	173041	130763	127689	180360	181533	154705	96317.6	142345	184649	195475	69552.5
171	388.337	28.5178	66487.2	76914.9	239768	164907	92345.9	362320	100158	70921.1	160474	64202.5	89703	225497	207123	245883	98729.2	125891	253574	264244	189056
172	389.345	28.5439	8944.68	10924.9	54710.7	36014.8	12785.6	98145.3	19576.4	14487.4	37314.5	13291.2	8607.07	49665.5	57732.3	62031.5	25493.3	35620.3	71739.4	56805.3	41491.7
173	359.2	30.7166	660641	304207	664468	313579	451474	584986	420585	417439	462831	237364	537534	420212	174317	442301	672260	586101	617344	502698	410218
174	382.296	36.663	31170.7	34151.1	29784.1	31447	22563.6	22805	38333.9	40485.7	43509.5	51728.1	56641.5	40975.6	51745	52395.8	49975.6	53720.3	57952.7	60061.3	53150.9
175	349.131	36.823	24881.5	27597.7	27185.8	26069.7	23387.4	32210.9	34401.6	28612.4	26446	28917.2	13688.4	30048.7	24773.5	32265.7	30189.4	11877.6	22404.4	22794	15246.7
176	391.022	36.8573	11226.8	22700.7	14619.8	15635.3	20830.9	14339.1	20844.7	11603.5	10053.2	21326.8	10320.8	16127.6	18424.7	19206.9	14312.5	21784.5	16885.8	20777.5	15756.7
177	261.085	36.875	133047	138665	138002	124099	125419	146698	112820	122801	127149	113756	118037	101007	106365	124838	120219	121706	119238	130503	109325
178	152.104	36.893	92495.5	95392.5	77450	67403.1	75133.3	111901	48210.2	112264	80948.5	56506.8	95255.4	57368.6	101101	91808.8	108321	109931	79303.8	83126.6	100620
179	203.032	36.964	26612	25666.8	28949	22726.7	26883.4	19271.9	11942.6	23695.7	18586.7	17404.1	19469.7	11856.7	9997.7	16207.6	25669.8	21072.2	7254.2	14505.1	22503.4

## Sheet: Different ionic products
Supplementary Table 1 - Mass spectrometry data used for clinical Aspergillus fumigatus metabolome analysis.
	M/Z	Re time	34	44	44 vs 34_log2foldchange	54	54 vs 34_log2foldchange	55	55 vs 34_log2foldchange	56	56 vs 34_log2foldchange	A26	A26 vs 34_log2foldchange	A28	A28 vs 34_log2foldchange	A32	A32 vs 34_log2foldchange	A38	A38 vs 34_log2foldchange	A41	A41 vs 34_log2foldchange	A55	A55 vs 34_log2foldchange	A64	A64 vs 34_log2foldchange	A66	A66 vs 34_log2foldchange	A68	A68 vs 34_log2foldchange	B14	B14 vs 34_log2foldchange	B36	B36 vs 34_log2foldchange	CEA17	CEA17 vs 34_log2foldchange	D81	D81 vs 34_log2foldchange	D83	D83 vs 34_log2foldchange
1	232.073	0.557073	47966.1	61484.8	0.358214	56566.1	0.237924	64316.8	0.42318	48100.2	0.00402747	59445.7	0.309558	47603.1	-0.0109606	53268	0.151255	70294.3	0.551393	73574.2	0.617185	69748.3	0.540143	80119	0.74013	73950.9	0.624553	51514.2	0.102954	72050.2	0.586988	63723.9	0.409819	67360.3	0.489883	65497.1	0.449416	69652.6	0.538162
2	441.103	0.559145	98566.7	179223	0.862581	111649	0.179797	126760	0.362923	94967.4	-0.0536692	155299	0.655874	106195	0.107549	143159	0.538449	144334	0.550235	174152	0.821171	121906	0.306594	183318	0.895172	231521	1.23197	95393.7	-0.047207	176164	0.837747	186543	0.920333	213488	1.11498	172938	0.811085	203119	1.04315
3	443.132	0.56247	6477.23	18234	1.49319	11059.2	0.771803	18072.4	1.48034	1817.8	-1.83318	22388.5	1.78931	1617.23	-2.00185	16271.1	1.32887	22942.5	1.82457	13896.7	1.10129	17078.4	1.39872	24882	1.94165	24527.9	1.92098	8195.63	0.339478	20818.1	1.68439	24269.5	1.9057	24172.8	1.89993	14176.4	1.13004	21194.4	1.71023
4	442.107	0.562625	15659.7	22350.5	0.513253	13507.5	-0.213294	21827	0.479059	15645.9	-0.00127592	22882.7	0.547197	23001	0.554637	32298.4	1.04441	23819.6	0.60509	23968.1	0.614061	25465.7	0.701496	25892.2	0.725458	41230.8	1.39666	17569.5	0.166012	34475.1	1.1385	40271.2	1.36269	40810.7	1.38189	35842.8	1.19463	34209	1.12732
5	419.161	0.562779	13221.5	26734	1.01579	10614.9	-0.316794	20574.4	0.637967	6788.7	-0.961679	20771.3	0.651703	19382.4	0.551864	18359.5	0.473642	10867.7	-0.282836	25315.8	0.937155	19314.6	0.546809	23082.8	0.803935	28294.2	1.09762	11521.1	-0.198613	26606.3	1.00888	23097.6	0.804859	27177.7	1.03954	30637.8	1.21243	23131.7	0.806984
6	269.126	0.563057	9877.56	18318.3	0.891056	6776.49	-0.543616	5726.39	-0.786528	716.491	-3.78513	16180	0.711985	14386.9	0.54253	27000.1	1.45074	15816.1	0.679163	14507.1	0.554529	8424.79	-0.229513	13604.3	0.461835	13242.8	0.422977	522.718	-4.24005	41725.6	2.07871	21581.4	1.12756	19302.7	0.966576	14582.6	0.562017	12393.1	0.327317
7	210.098	0.576612	20339.3	46818.3	1.2028	21552.4	0.0835767	30541.3	0.586492	27595	0.440134	36675.9	0.850561	35600.8	0.807639	32615.9	0.681305	39806.5	0.968731	33188.5	0.706411	29422.4	0.532645	36470.2	0.842447	35670.6	0.810463	18496.9	-0.136991	43331.5	1.09114	34753.7	0.772896	28426.1	0.482946	30505.3	0.584787	34696.5	0.770517
8	299.149	4.99526	24657.8	27030.6	0.132547	25846.6	0.0679265	19984.6	-0.303157	710.38	-5.11731	1823.12	-3.75757	16417	-0.586857	38031.4	0.625145	38459.5	0.641294	50484.4	1.03379	2106.54	-3.5491	100995	2.03417	58536.7	1.24729	2585.32	-3.25363	27713	0.168519	2215.11	-3.47659	1	-14.5898	2701.94	-3.18998	116528	2.24056
9	241.165	5.45247	126245	173981	0.4627	158637	0.329499	128004	0.0199568	11722.7	-3.42886	1230.19	-6.68121	126882	0.00726173	124633	-0.0185416	103128	-0.291796	265892	1.07461	3260.15	-5.27515	130861	0.0518	91147.9	-0.46995	20655.5	-2.61163	79660.6	-0.664293	26912.7	-2.22987	17065.7	-2.88706	11802.5	-3.41907	212626	0.752087
10	284.142	5.48334	31860.2	35012.9	0.136135	37711.2	0.24324	45172.5	0.503691	17686.1	-0.849137	19691.8	-0.694155	11641.3	-1.4525	7900.08	-2.01181	69802.2	1.13152	34191.7	0.101891	189.381	-7.39432	30225.6	-0.0759836	18289.7	-0.800723	51399.2	0.689993	17942.5	-0.828372	20888.4	-0.60905	26871.8	-0.245661	5499.96	-2.53426	30576.1	-0.0593469
11	306.077	5.49455	20753.2	15440.5	-0.42661	34744.7	0.743463	38015.2	0.873244	24372	0.231891	21651	0.0611016	10838.7	-0.937136	11420.1	-0.86176	49320.8	1.24887	24149.9	0.218684	1715.33	-3.59677	22178.8	0.0958501	16314.3	-0.347196	42989	1.05064	7107.38	-1.54594	16078	-0.368245	8582.14	-1.27392	3907.52	-2.40901	14875.3	-0.480411
12	430.233	5.70385	28365	22402.3	-0.340464	28642.1	0.0140296	35054.5	0.30549	26988.6	-0.0717593	34860.7	0.29749	28441.4	0.00388387	39032.7	0.460575	35235.8	0.312934	36783.4	0.374944	32398.8	0.191832	24183	-0.230119	29043.6	0.0341113	35751.5	0.333895	21020.9	-0.432288	25050.5	-0.179271	22112.7	-0.359232	16555.9	-0.776764	13188.8	-1.1048
13	391.165	5.76996	7247.28	11764.4	0.698922	26851.3	1.88948	17798.9	1.29628	7135.07	-0.0225122	41204.1	2.50728	4505.67	-0.685697	40828.9	2.49408	100911	3.7995	25968.8	1.84127	2220.12	-1.7068	22894.6	1.6595	30750.2	2.08508	54745.3	2.91722	25831.6	1.83362	17232.4	1.24961	6815.57	-0.0886055	5219.65	-0.473486	15523.7	1.09897
14	500.214	6.19594	11060	13092.2	0.243351	12749.4	0.205083	7770.39	-0.509293	65794	2.57261	24170.9	1.12792	67493.3	2.60939	76865.4	2.79698	63595.7	2.52358	68283.5	2.62619	2378.64	-2.21714	67234.2	2.60384	76440.6	2.78899	161958	3.87219	88055.6	2.99306	139213	3.65387	82926.3	2.90648	6172.8	-0.841355	44331.1	2.00297
15	899.295	6.59636	90482.4	94432	0.0616383	94993.9	0.070198	95339.3	0.0754346	1799.99	-5.65157	127065	0.489859	181564	1.00477	274723	1.60227	51797.3	-0.804761	42435.4	-1.09237	117722	0.379674	55396.1	-0.707852	47969.5	-0.91552	28299.2	-1.67687	89519.1	-0.015441	45944.1	-0.977757	1	-16.4653	78310.3	-0.208436	61648	-0.553582
16	928.276	7.1755	280354	332421	0.245763	354234	0.337452	306169	0.12708	15191.4	-4.20592	296480	0.0806853	325413	0.21502	277813	-0.0131371	332241	0.244978	468662	0.741296	349787	0.319226	319182	0.187129	295368	0.0752619	974579	1.79753	592997	1.08078	649928	1.21303	39590.3	-2.82403	123046	-1.18805	459681	0.713384
17	929.262	7.17658	133906	153467	0.1967	163552	0.288524	147668	0.14113	2880.03	-5.539	146748	0.132111	159831	0.255325	122908	-0.123642	150967	0.173009	210916	0.655442	160459	0.260977	132095	-0.0196529	147969	0.144067	478673	1.83781	290250	1.11607	317137	1.24388	7934.05	-4.07702	67720	-0.983573	230675	0.784636
18	454.1	7.65787	52455.6	51794.9	-0.0182885	77547.3	0.563979	57144.7	0.123522	143411	1.45098	37168.1	-0.497034	48284.3	-0.119544	101341	0.950048	48724.9	-0.106439	180754	1.78485	4769.32	-3.45924	162845	1.63433	70132.4	0.418983	98015.9	0.901917	60926.7	0.215977	113447	1.11285	112902	1.1059	6115.29	-3.1006	52516.5	0.00167132
19	876.363	7.67587	1331.71	15802.6	3.56881	52495.6	5.30084	22706.2	4.09173	590.869	-1.17237	20890	3.97146	17067.1	3.67986	21435.6	4.00865	57180	5.42416	174334	7.03243	94976.5	6.15622	186385	7.12886	10564.1	2.98781	56999.7	5.4196	15553.5	3.54588	118525	6.47576	1	-10.3791	1	-10.3791	35900.1	4.75263
20	875.354	7.67984	26677.1	51924.4	0.960812	100656	1.91576	58581.5	1.13484	1	-14.7033	45154.4	0.759267	41307.8	0.630813	57818.4	1.11593	105258	1.98026	377800	3.82395	214717	3.00876	454839	4.09168	55859.3	1.0662	157606	2.56265	49444.8	0.890217	319758	3.58331	1	-14.7033	1097.21	-4.60369	99734.3	1.90249
21	853.389	7.67984	20864.2	24692.6	0.243053	70686.4	1.7604	49012.6	1.23212	1	-14.3487	11598.9	-0.847045	20527.4	-0.0234758	26295.4	0.333784	48869	1.22789	157855	2.9195	148137	2.82783	86410.7	2.05018	36564.1	0.809402	68983.2	1.72522	26561	0.348284	119598	2.5191	1	-14.3487	433.08	-5.59025	52209	1.32327
22	943.264	7.69528	19103.7	43347.6	1.1821	49951.1	1.38666	40570.3	1.08657	1267.71	-3.91356	23160.1	0.277789	15647.3	-0.287943	33812	0.823679	53872.5	1.49569	65166.3	1.77027	31259.9	0.710458	54210.6	1.50472	28453.3	0.574741	134537	2.81608	53697.9	1.49101	121883	2.67357	6544.87	-1.54542	3006.49	-2.6677	19703.9	0.0446288
23	500.21	7.6979	58769.4	6308.97	-3.21959	56897.1	-0.0467111	7971.83	-2.88208	30593	-0.941866	72468.7	0.302293	50030.5	-0.232258	53189	-0.143938	47263.7	-0.314333	51229.7	-0.198086	3852.87	-3.93106	47014.7	-0.321955	51260.9	-0.197208	91906.5	0.645101	62628.8	0.0917598	87253.1	0.570141	41524.2	-0.501114	3410	-4.10722	22270.9	-1.39991
24	942.266	7.70293	60197	102755	0.771446	101401	0.752303	81743.3	0.441408	1997.68	-4.91329	48930.8	-0.298951	36862	-0.707557	68610.6	0.188739	95826.4	0.67073	109556	0.863907	68917.5	0.195178	100275	0.7362	67316.5	0.161268	249617	2.05195	103456	0.78125	231887	1.94566	3425.45	-4.13533	10865.1	-2.46999	64502.1	0.0996536
25	243.06	7.94288	22265.1	28294.9	0.345756	19228.6	-0.211532	27531.2	0.306283	332.098	-6.06703	24927.2	0.162936	69084.2	1.63357	8336.73	-1.41723	4019.16	-2.46982	61884.9	1.4748	208.66	-6.73748	41633	0.902943	851.952	-4.70787	3395.81	-2.71296	1	-14.4425	25033.5	0.169074	1078.23	-4.36804	1110.1	-4.32602	36802.5	0.725019
26	546.146	7.9466	23865.1	47384	0.989498	29400.9	0.300961	23138.4	-0.0446125	1	-14.5426	7366.36	-1.69588	94096.2	1.97923	5468.99	-2.12555	1	-14.5426	97387.5	2.02884	1	-14.5426	59001.5	1.30585	1	-14.5426	595.093	-5.32564	1	-14.5426	37504.9	0.652178	1	-14.5426	1	-14.5426	67144.9	1.49238
27	310.079	7.95783	39361.1	61674.4	0.647902	28058.6	-0.488328	53765.8	0.449917	396.707	-6.63255	33920.4	-0.214616	116041	1.55979	22504.2	-0.806573	4744.04	-3.05258	102369	1.37893	193.101	-7.67127	61857.3	0.652174	529.653	-6.21558	5029.34	-2.96833	13973.3	-1.4941	53486.2	0.442395	966.505	-5.34785	543.227	-6.17907	75219.3	0.934333
28	554.12	7.95989	37025.8	121109	1.7097	48897.3	0.401225	66523.7	0.845337	1	-15.1762	35680.6	-0.0533903	183841	2.31186	6894.01	-2.42512	345.697	-6.74288	150243	2.0207	1	-15.1762	110909	1.58277	1	-15.1762	3142.96	-3.55834	162.322	-7.83353	81019.9	1.12975	182.082	-7.6678	1	-15.1762	134353	1.85942
29	309.093	7.96104	230243	438872	0.930642	289869	0.332241	331694	0.526694	1695.61	-7.08521	258032	0.16439	651855	1.50139	136717	-0.751961	18389.3	-3.64622	640984	1.47713	1126.01	-7.67579	424349	0.882094	12556	-4.19671	26619	-3.11263	4687.7	-5.61813	356757	0.631785	1254.94	-7.5194	3434.84	-6.06677	471852	1.03518
30	736.16	7.96145	152480	322274	1.07967	200867	0.397626	205508	0.430581	1	-17.2183	153586	0.0104349	566675	1.89391	65384.8	-1.22159	3281.92	-5.53793	446166	1.54896	1	-17.2183	316362	1.05296	1	-17.2183	1532.31	-6.63676	198.57	-9.58476	212236	0.477056	1	-17.2183	1	-17.2183	357746	1.23032
31	357.082	7.96443	66566.6	118701	0.834458	70341.3	0.0795727	76548	0.201566	920.72	-6.17589	59053.4	-0.172779	150974	1.18142	28871.3	-1.20516	16276.7	-2.03199	155734	1.22622	1265.28	-5.71727	88213.7	0.406205	2217.4	-4.90786	3589.01	-4.21314	2850.24	-4.54564	82361.9	0.307178	1451.43	-5.51925	4195.39	-3.98792	80018.3	0.26553
32	291.083	7.96487	63990.4	114667	0.841529	65899.3	0.0424075	77289.3	0.272414	1638.14	-5.28773	46848.6	-0.449849	132186	1.04664	27333	-1.22721	10219.4	-2.64654	131359	1.03759	544.113	-6.8778	77690.6	0.279885	979.03	-6.03036	5629.21	-3.50685	2534.33	-4.65818	73924.8	0.208203	2212.43	-4.85415	1568.43	-5.35046	81879.3	0.355644
33	379.079	7.96585	276054	474859	0.782548	335513	0.281417	363412	0.396654	3112.35	-6.4708	288687	0.0645547	684444	1.30998	175470	-0.653725	46044.1	-2.58386	592538	1.10196	164.098	-10.7162	475098	0.783273	12926.1	-4.41659	35376.1	-2.9641	4281.71	-6.01062	406146	0.557048	184.55	-10.5467	4937.65	-5.80498	513929	0.896618
34	738.15	7.96644	22565.5	75876.3	1.74953	38394.7	0.766789	48774.9	1.11202	1	-14.4618	31141.7	0.464729	113005	2.3242	11345.8	-0.991957	1185.98	-4.24997	87721.9	1.95882	1	-14.4618	70132.6	1.63597	1	-14.4618	1	-14.4618	1	-14.4618	42105.1	0.899879	1	-14.4618	1	-14.4618	76929.6	1.76942
35	735.143	7.96728	401855	881353	1.13305	491596	0.290799	581372	0.532787	1	-18.6163	409863	0.0284684	1.51858e+06	1.91798	166257	-1.27326	20606.9	-4.28548	1.19443e+06	1.57158	919.118	-8.77221	850923	1.08236	1978.15	-7.66638	9750.42	-5.36507	1	-18.6163	596718	0.570375	187.541	-11.0653	1611.36	-7.96225	947623	1.23764
36	737.135	7.96728	106184	240216	1.17777	151262	0.51049	156516	0.559749	1	-16.6962	107930	0.0235367	407306	1.93955	47040	-1.1746	4523.96	-4.55283	313505	1.56193	1	-16.6962	229493	1.11189	1	-16.6962	3229.73	-5.039	1	-16.6962	155821	0.55333	1	-16.6962	1	-16.6962	266593	1.32808
37	420.137	7.96782	25927.5	55592	1.10039	36435.4	0.490856	60614.6	1.22518	2446.18	-3.40588	37176.6	0.519911	100642	1.95668	19474.6	-0.412893	4113.18	-2.65616	74765.6	1.52789	1	-14.6622	61566.6	1.24766	670.474	-5.27316	785.146	-5.04538	1429.28	-4.18113	53691.3	1.0502	714.39	-5.18163	1	-14.6622	60442.6	1.22108
38	380.052	7.96782	56650.2	82755.2	0.546769	66014.1	0.220693	70065.3	0.306619	387.447	-7.19194	41490.6	-0.449294	112263	0.986726	23768.6	-1.25302	3906.48	-3.85814	114849	1.01959	1	-15.7898	93813.8	0.72772	251.33	-7.81635	9201.57	-2.62213	1530.32	-5.21018	64353.9	0.183947	245.204	-7.85195	462.568	-6.93627	110761	0.967294
39	381.053	7.9774	24542.1	30855.3	0.330264	24524.8	-0.00101387	41506.3	0.758073	420.444	-5.8672	11851.8	-1.05015	79426	1.69435	12457.1	-0.978292	7034.9	-1.80266	71625.3	1.54521	229.953	-6.73778	53049.9	1.11209	1010.58	-4.602	2543.4	-3.27043	1	-14.583	33373.7	0.443456	891.267	-4.78326	793.896	-4.95016	40329.1	0.716565
40	286.07	7.97788	82186.1	131275	0.675622	65522	-0.326915	60441.8	-0.443347	168.178	-8.93276	75121.4	-0.12967	102731	0.321901	73545.5	-0.160258	18063.3	-2.18584	114349	0.476481	707.131	-6.86077	89505	0.123074	2632.11	-4.9646	5261.07	-3.96547	868.244	-6.56465	105559	0.361088	185.531	-8.79109	1828.76	-5.48996	82815.8	0.0110111
41	498.184	8.23793	10429.9	12210.2	0.227357	14168.6	0.441974	9554.41	-0.12649	58297	2.48269	44096.2	2.07993	50470.6	2.27472	91787.6	3.13757	63198.1	2.59915	34195.3	1.71307	1688.32	-2.62707	23398.2	1.16567	59514.8	2.51252	101682	3.28527	68883.5	2.72343	41515.9	1.99293	60626.4	2.53922	10165.3	-0.0370739	26862.4	1.36486
42	396.176	8.42681	58563.8	61603.4	0.0730001	95796.6	0.709966	91918	0.650338	70608.2	0.269827	14240.8	-2.03998	93602.9	0.676543	107396	0.874863	84564.3	0.530039	66093.8	0.174505	4164.89	-3.81366	4403.38	-3.73333	79989.3	0.449797	66139.5	0.175502	152385	1.37964	102797	0.811712	157941	1.4313	25683.5	-1.18917	109292	0.900112
43	464.177	8.57053	57899.1	53570.2	-0.112111	67477.6	0.220868	51863.6	-0.158819	2786.92	-4.3768	121602	1.07056	18538.4	-1.64303	81332.1	0.490284	164394	1.50555	66848.9	0.207363	187.622	-8.26957	96034.7	0.730014	60255.4	0.0575491	87425.5	0.594513	64921.2	0.165148	39792.8	-0.541035	2800.18	-4.36995	1560.93	-5.21306	51824.6	-0.159904
44	462.2	8.57062	1.28139e+06	1.24489e+06	-0.0416919	1.38893e+06	0.116261	1.10926e+06	-0.208114	198216	-2.69257	2.52204e+06	0.976882	405662	-1.65936	1.59901e+06	0.319466	3.08679e+06	1.2684	1.28412e+06	0.00307366	32847.6	-5.28578	1.74264e+06	0.443567	1.48082e+06	0.208682	1.79705e+06	0.487921	1.21047e+06	-0.082149	682851	-0.908069	119375	-3.42414	50522.7	-4.66464	920974	-0.476479
45	463.197	8.57135	354265	370816	0.065872	392055	0.146225	318220	-0.154806	54854.1	-2.69116	704301	0.991362	104043	-1.76765	469828	0.407302	866499	1.29037	353824	-0.00179798	4478.51	-6.30567	498657	0.493219	401107	0.179159	542528	0.614868	304051	-0.220516	186801	-0.923326	18979.4	-4.22232	9992.12	-5.1479	265477	-0.416241
46	945.274	8.58774	112410	116753	0.0546917	148911	0.405677	121511	0.11232	10642.3	-3.40089	326632	1.5389	15412.2	-2.86662	197418	0.812486	397503	1.8222	106520	-0.0776509	3406.89	-5.04417	178709	0.668842	142139	0.338534	218966	0.961935	133554	0.248659	61744.6	-0.864385	4541.13	-4.62958	195.881	-9.16458	75231.6	-0.579358
47	946.278	8.58827	65836.6	66025.7	0.0041398	72096.8	0.131046	68085.6	0.04846	2892.7	-4.5084	191455	1.54004	7539.69	-3.12631	97211	0.562231	196914	1.58061	53772.2	-0.292027	335.281	-7.61737	104647	0.668569	89096.8	0.436485	110152	0.742539	69401.4	0.0760755	23881	-1.46303	2807.16	-4.5517	1	-16.0066	51181.4	-0.363268
48	444.175	8.58831	505399	504060	-0.00382658	597400	0.241274	513246	0.0222264	85141.8	-2.56948	1.11765e+06	1.14497	201756	-1.32481	741447	0.55292	1.39444e+06	1.46419	581507	0.202374	8695.68	-5.86098	796573	0.656384	618712	0.291845	794875	0.653304	527079	0.0605955	310330	-0.703621	53150.1	-3.24928	13568.8	-5.21906	460544	-0.134085
49	369.225	8.59804	22459.8	37337.3	0.733273	34057.1	0.600613	19771.1	-0.183949	4963.9	-2.1778	704.135	-4.99535	17270.1	-0.379068	25145.7	0.162968	2651.43	-3.0825	67972.2	1.5976	2288.82	-3.29467	29606.3	0.398562	80108.6	1.83461	12060.2	-0.897085	16890.5	-0.411129	21856.6	-0.0392772	2972.81	-2.91744	2384.01	-3.23588	47689.4	1.08632
50	445.158	8.59896	157039	119390	-0.395434	175923	0.163824	98641.7	-0.670853	14784.8	-3.40893	312696	0.99364	56004.6	-1.4875	221398	0.495521	403966	1.36311	168912	0.105151	2302.63	-6.0917	105950	-0.567744	181331	0.207502	228769	0.542769	142758	-0.137548	85932.9	-0.869839	7325.31	-4.42209	2801.85	-5.8086	135201	-0.216016
51	367.226	8.60597	580542	1.09518e+06	0.9157	1.01762e+06	0.809724	689212	0.247546	95091.5	-2.61001	2825.05	-7.68298	511666	-0.182199	723591	0.317773	124109	-2.2258	1.83425e+06	1.65972	107209	-2.43698	1.05346e+06	0.859662	2.35424e+06	2.01979	618789	0.0920453	436880	-0.410164	436880	-0.410164	92115.2	-2.65589	59774.2	-3.27981	1.67555e+06	1.52916
52	368.238	8.60598	125623	305907	1.28399	253105	1.01063	190959	0.604161	18449.3	-2.76747	629.68	-7.64027	155599	0.308729	183689	0.548158	38620.1	-1.70168	476972	1.9248	33005.1	-1.92834	256988	1.0326	622178	2.30822	160731	0.35554	112968	-0.153192	125952	0.00376678	18078.5	-2.79676	16718.7	-2.90957	445382	1.82594
53	484.172	8.60645	147135	136737	-0.105738	144263	-0.0284367	149561	0.0235921	199760	0.441125	243396	0.726165	74549.2	-0.980877	159650	0.117769	247985	0.753108	136757	-0.105533	15412.4	-3.25498	167443	0.186523	141009	-0.0613509	160069	0.121549	160449	0.124968	94332.1	-0.641322	141068	-0.0607544	48334.2	-1.60603	113534	-0.374021
54	404.13	8.72188	47675.5	62766.2	0.39674	76707.5	0.686118	54775.6	0.200285	8631.61	-2.46555	114968	1.26991	21202	-1.16905	73739.8	0.629194	130791	1.45594	50571.7	0.0850815	1986.36	-4.58505	84842.1	0.831532	48243.5	0.0170851	85702.4	0.846087	52492.8	0.138872	29248.3	-0.704897	5513.66	-3.11217	3901.31	-3.61122	52614.6	0.142215
55	403.123	8.72199	235983	219649	-0.103478	305702	0.373447	285232	0.273456	51074.2	-2.20801	429955	0.865504	103618	-1.18741	318381	0.432074	544820	1.2071	229413	-0.0407352	9892.12	-4.57626	362972	0.621179	266637	0.176196	332456	0.494481	208130	-0.181197	141509	-0.737783	19267.7	-3.61443	12088.8	-4.28694	224133	-0.0743278
56	542.24	8.88096	46802.9	33286	-0.491682	43768.4	-0.096708	36258.8	-0.368267	116712	1.31829	153997	1.71823	254300	2.44186	475901	3.34599	161352	1.78554	136795	1.54735	28315.3	-0.725019	196548	2.07021	215167	2.20079	436309	3.22068	466252	3.31644	160979	1.7822	102689	1.13361	17478.2	-1.42104	109485	1.22607
57	543.229	8.8848	13779.1	11699.2	-0.236068	10815.8	-0.349343	10202.9	-0.433495	33577.8	1.28503	54389.8	1.98086	88486	2.68297	163533	3.56903	52149.7	1.92018	40068.2	1.53998	4201.8	-1.7134	75266.1	2.44952	62180.3	2.17398	144356	3.38908	147886	3.42393	36027.5	1.38662	31763.5	1.20489	6002.43	-1.19886	36097.7	1.38943
58	345.144	8.90723	29083.8	31588.6	0.119189	41090.4	0.498587	18106.5	-0.683708	6987.48	-2.05737	38879.1	0.418782	4748.09	-2.6148	49598.2	0.770075	149294	2.35987	39942.7	0.457719	317.231	-6.51854	49507	0.767417	33312.1	0.195834	44124.8	0.601376	29441.5	0.0176351	13161.8	-1.14386	3053.52	-3.25167	384.056	-6.24275	26783.4	-0.118873
59	309.213	9.28493	229049	425561	0.89371	327479	0.515748	238534	0.0585414	9526.51	-4.58757	533.233	-8.74667	77644.2	-1.56071	211772	-0.113144	44776	-2.35486	712503	1.63724	1184.41	-7.59534	266366	0.217752	507221	1.14696	281994	0.300011	107549	-1.09066	219574	-0.0609496	3415.52	-6.06741	5341.78	-5.42219	386744	0.755721
60	396.171	9.29895	29952	37634.6	0.329404	69956.3	1.2238	46945.5	0.648334	108181	1.85272	11506.3	-1.38023	52628.5	0.81319	85799.3	1.51831	25262.1	-0.245678	82858.4	1.46799	4416.47	-2.76169	3943.97	-2.92493	67573.1	1.1738	91037.9	1.60381	85739.2	1.5173	56302.4	0.910543	170603	2.50992	3809.56	-2.97496	56371.2	0.912305
61	429.166	9.51803	25445.5	10107.3	-1.33201	17856	-0.511001	14753.2	-0.786385	43788.6	0.783143	391461	3.94338	14237.2	-0.83775	151244	2.57139	252270	3.30949	65529.4	1.36473	30790.8	0.275088	141502	2.47534	56135.9	1.14151	43794.2	0.783327	72526.2	1.51109	15569.3	-0.708712	78642.1	1.62789	20599.5	-0.304804	47646.6	0.904962
62	448.169	9.52385	6047.98	4943.36	-0.290963	12161.2	1.00776	9633.52	0.671609	44870.4	2.89124	253415	5.3889	8481.3	0.48783	89434.6	3.88631	143813	4.5716	35427.6	2.55035	11405.1	0.915151	68224.8	3.49577	39079.7	2.69189	27535.7	2.18678	42847	2.82467	5276.28	-0.196935	54534.8	3.17265	15057	1.3159	28632	2.2431
63	447.183	9.52583	101056	85087.8	-0.248125	108438	0.10172	99735.5	-0.0189694	243460	1.26853	1.5133e+06	3.90447	65998.1	-0.614653	513213	2.34441	915222	3.17897	259225	1.35906	138712	0.456944	521727	2.36815	193195	0.934906	174003	0.783967	255122	1.33604	64884.9	-0.639193	296068	1.55078	88873.2	-0.185328	152523	0.59388
64	446.188	9.52797	428626	303673	-0.497201	437417	0.0292926	352041	-0.283974	841283	0.972873	5.31714e+06	3.63286	271355	-0.659536	1.90219e+06	2.14987	3.30274e+06	2.94587	941828	1.13575	481132	0.166715	1.82339e+06	2.08883	700746	0.709173	664016	0.631499	966772	1.17346	253050	-0.760297	1.01261e+06	1.24028	310394	-0.46562	520536	0.280279
65	428.167	9.53359	114671	84932	-0.433122	106525	-0.106308	107190	-0.0973333	188228	0.714981	1.45839e+06	3.6688	84842.3	-0.434647	529503	2.20714	916244	2.99823	286912	1.3231	143624	0.324793	522145	2.18695	192359	0.746295	92213.3	-0.314455	241597	1.0751	77544.5	-0.564406	241294	1.07329	92226.8	-0.314244	174744	0.607744
66	913.292	9.5344	24709.7	6615.73	-1.9011	15720.5	-0.65243	18536.4	-0.414717	136432	2.46503	1.11277e+06	5.49294	9169.97	-1.43009	386001	3.96546	633800	4.68088	110724	2.16382	49713.8	1.00857	302845	3.61543	87580.5	1.82553	52299	1.08171	138766	2.4895	10661.1	-1.21272	159814	2.69325	20779.4	-0.249923	56834.6	1.20169
67	468.178	9.61738	60537	38989.5	-0.634732	49370.9	-0.294157	54333.8	-0.155968	145447	1.2646	492488	3.0242	60368.4	-0.00402314	275620	2.18679	353062	2.54403	137480	1.18333	64476.6	0.0909579	246513	2.02577	104830	0.792161	75165.3	0.31225	153706	1.34428	69336.8	0.195805	149202	1.30138	52132.8	-0.215625	112856	0.898588
68	469.171	9.6338	13505.6	11253.3	-0.263218	15241.1	0.174403	10260.5	-0.396456	35312.2	1.3866	142298	3.39728	19658	0.541554	70750.6	2.38918	99218.6	2.87705	27501.4	1.02595	22114.8	0.711448	58665.3	2.11895	28244.9	1.06443	24736	0.873053	36765.5	1.44479	12583.8	-0.101994	31808.1	1.23583	11053.4	-0.289068	21500.3	0.670796
69	555.297	9.66217	63766.1	88343.4	0.470333	104732	0.715836	92954.2	0.54373	7251.76	-3.13639	28611.7	-1.15619	11504.1	-2.47064	14629.1	-2.12395	18111	-1.81592	30958.9	-1.04244	4803.04	-3.73077	38967.3	-0.710527	31600.9	-1.01283	22031.9	-1.5332	34660.7	-0.879488	23010	-1.47053	9975.04	-2.6764	4966.25	-3.68256	30922.3	-1.04414
70	911.275	9.74403	161062	157075	-0.0361678	199533	0.309008	159951	-0.0099886	29258.7	-2.46068	534421	1.73036	70727.4	-1.18728	350936	1.12359	566325	1.81401	197984	0.297767	434.611	-8.53368	365267	1.18133	260259	0.692328	179848	0.15916	179951	0.159989	94358.4	-0.771396	5710.58	-4.81784	476.234	-8.40173	204543	0.344786
71	467.163	9.74563	51596.8	61054.1	0.242807	63237	0.293487	53225.9	0.0448474	20855.9	-1.30683	64450.2	0.320903	48610.7	-0.0860092	87652.3	0.76451	89678	0.797472	56698.2	0.136021	5430.61	-3.2481	94703.6	0.876137	76868.7	0.575114	33892.9	-0.606298	69900.1	0.438012	53179.1	0.0435766	5728.46	-3.17106	4700.95	-3.45626	65618.9	0.34683
72	445.184	9.74638	457356	460162	0.00882643	567347	0.310914	467477	0.0315782	120034	-1.92988	919263	1.00716	246515	-0.891642	684982	0.58275	1.08046e+06	1.24026	536603	0.230538	29273.2	-3.96566	756569	0.726156	544716	0.252188	611258	0.418466	457809	0.00142955	306576	-0.577072	55095.3	-3.05331	32437.1	-3.8176	480919	0.0724788
73	482.09	9.75767	44378.5	48534.8	0.129157	40451.6	-0.133664	59831.7	0.431047	6646.28	-2.73924	76917.9	0.793458	30919	-0.521368	78179.4	0.816926	56025.4	0.336218	29494.3	-0.589427	2040.44	-4.44291	52122.5	0.232045	60411.7	0.444967	38000.4	-0.223846	65664.3	0.565247	22694.7	-0.967509	3522.13	-3.65534	1764.54	-4.6525	42521.2	-0.0616801
74	427.147	9.75804	251792	247990	-0.0219497	288422	0.195953	276437	0.13472	79485.5	-1.66347	427052	0.76218	136477	-0.883572	325144	0.36885	463468	0.880238	263842	0.0674449	18933.2	-3.73324	366845	0.54294	300604	0.255631	307866	0.290072	245647	-0.0356428	165334	-0.60685	39919	-2.65708	14112.2	-4.15721	240912	-0.0637274
75	466.151	9.75804	188078	199000	0.0814368	223749	0.250551	237224	0.334922	84993.5	-1.14591	269575	0.519358	189005	0.00709358	277277	0.559998	316256	0.749761	252638	0.425739	19615.9	-3.26123	279322	0.5706	255976	0.444678	226076	0.265479	222656	0.243488	190246	0.0165338	56090.9	-1.74549	27631.1	-2.76697	262613	0.481608
76	444.18	9.75828	1.66146e+06	1.59885e+06	-0.0554161	1.92652e+06	0.213543	1.66232e+06	0.000746563	445538	-1.89883	3.0733e+06	0.887334	855610	-0.95743	2.29109e+06	0.463579	3.54838e+06	1.0947	1.89823e+06	0.192203	122597	-3.76045	2.51465e+06	0.597904	1.89417e+06	0.189108	2.05871e+06	0.309287	1.59098e+06	-0.0625406	1.03122e+06	-0.688107	212629	-2.96604	134436	-3.62746	1.59248e+06	-0.0611823
77	426.17	9.75854	828241	888501	0.101322	995416	0.265248	899304	0.118757	251842	-1.71753	1.44001e+06	0.797952	484139	-0.774631	1.13736e+06	0.457572	1.67962e+06	1.02001	991304	0.259276	60459.7	-3.77601	1.16554e+06	0.492878	1.03672e+06	0.323901	1.06484e+06	0.362517	833634	0.00936358	610361	-0.440389	123634	-2.74398	79148.4	-3.38742	867335	0.0665379
78	909.289	9.77525	892190	843323	-0.0812652	977665	0.131989	866441	-0.0422487	70016.9	-3.67158	1.83194e+06	1.03795	295355	-1.5949	1.34942e+06	0.596915	2.06359e+06	1.20973	777946	-0.197681	6954.83	-7.00319	1.35707e+06	0.605073	1.13487e+06	0.347102	860270	-0.0525609	862760	-0.0483907	443497	-1.00843	22979.1	-5.27896	6245.25	-7.15845	815676	-0.129354
79	910.292	9.7762	476019	424072	-0.166709	586154	0.300261	498329	0.06608	37812.4	-3.65409	1.05881e+06	1.15335	188452	-1.33682	787409	0.726095	1.18945e+06	1.3212	489411	0.0400283	1391.61	-8.41812	792386	0.735185	651293	0.452288	492203	0.0482341	464405	-0.0356358	263540	-0.852999	497.464	-9.90221	1588.33	-8.22736	434165	-0.132777
80	551.226	9.78072	75981.2	53014.3	-0.519263	100481	0.403202	76919	0.0176963	27224.8	-1.48072	128247	0.755215	55495.2	-0.45328	84029.4	0.145251	117255	0.625934	68025.9	-0.159558	1562.25	-5.60395	107371	0.498895	83846.6	0.142109	61685.5	-0.300713	84620.8	0.155369	51257.4	-0.567882	6851.63	-3.47112	4271.21	-4.15292	43829.2	-0.793751
81	507.165	9.79238	59219.6	72361.8	0.289155	64034.1	0.112767	36080.1	-0.714872	18386.7	-1.68741	77310.7	0.384594	33183.3	-0.835615	85226.6	0.52523	82858.3	0.484573	58774.4	-0.0108871	3619.17	-4.03234	69673.6	0.234539	77761.8	0.392988	66873.7	0.175366	59173.3	-0.0011279	54249.3	-0.12647	5006.57	-3.56418	4324.97	-3.77531	73757.5	0.316716
82	554.185	9.79388	140394	119817	-0.228651	131966	-0.0893249	115616	-0.28015	59455.1	-1.23961	142798	0.0244933	95189.7	-0.560609	149523	0.0908823	142801	0.0245155	130000	-0.110972	12659.6	-3.47119	130852	-0.101547	123699	-0.182658	110209	-0.349242	121440	-0.209245	82140	-0.77333	28619.9	-2.29439	13622.1	-3.36547	115528	-0.28125
83	375.111	9.85929	8732.44	15798.6	0.85534	4698.15	-0.894292	4351.69	-1.00481	94812.1	3.44061	14581.8	0.73971	37457	2.10078	11306.4	0.372689	18457.8	1.07977	279019	4.99783	8559.49	-0.0288597	8554.36	-0.0297247	74069.7	3.08443	679892	6.28278	33346.4	1.93307	18332.9	1.06998	78287.9	3.16433	7778.12	-0.166962	38124.1	2.12625
84	436.141	9.86421	20525.4	20817.7	0.0203956	43375.2	1.07946	31345.4	0.61084	32873.5	0.679514	22404	0.126342	11809.7	-0.79744	32047	0.642776	18735.3	-0.131652	28355.2	0.466201	1	-14.3251	44752	1.12454	24654.8	0.264453	14818.2	-0.470037	16457.9	-0.31863	56356.6	1.45717	43863.1	1.09559	1850.92	-3.4711	22638.4	0.141362
85	458.181	10.108	21172	24763.7	0.226068	34209	0.692217	23567.6	0.154647	4408.06	-2.26394	34276.1	0.695042	836.522	-4.66161	20223	-0.0661655	37164.9	0.811782	13257	-0.675405	343.511	-5.94566	29227.5	0.465167	26330.3	0.314565	25263.1	0.254869	21416.6	0.0165678	9327.04	-1.18267	1110.48	-4.25291	544.091	-5.28217	18283.4	-0.211628
86	476.188	10.1147	64361.6	94443.5	0.55325	93436.8	0.537791	99201.1	0.624155	19502.4	-1.72255	96388.9	0.582666	14019.2	-2.1988	68846.6	0.0971853	119392	0.891435	51176.6	-0.330717	2301.93	-4.80529	90350.6	0.489333	78154	0.280119	83518.9	0.375901	76518	0.249598	48446.9	-0.409798	8895.99	-2.85497	1611.06	-5.32012	53324.1	-0.271414
87	382.172	10.1598	55832.4	73226.2	0.391257	56925.6	0.0279738	43229.4	-0.369089	91143	0.707029	23967.3	-1.22004	43106.3	-0.373204	33528	-0.735738	77291.3	0.469204	37185.8	-0.586352	5539.99	-3.33315	12730.8	-2.13277	18425.4	-1.5994	110577	0.985873	48355	-0.207438	20493.1	-1.44597	74950.1	0.424828	11343.9	-2.29919	45718.8	-0.288315
88	525.252	10.1872	43321.4	57406.9	0.406146	49619	0.195815	58565.3	0.434967	43828.7	0.0167983	49615.6	0.195716	63391.9	0.54922	44243.2	0.0303762	57926.4	0.419142	54588.9	0.333529	54353.2	0.327287	44153.7	0.0274543	52895.5	0.288066	49180.3	0.183002	38292	-0.178037	50060.2	0.208584	49223.5	0.184269	54372.4	0.327795	60643.2	0.485268
89	381.18	10.635	135816	170180	0.325404	249572	0.877804	203924	0.586374	259436	0.933723	74536.3	-0.86564	260101	0.937418	246505	0.859965	300299	1.14475	96015.3	-0.500318	4091.03	-5.05305	3098.88	-5.45377	204906	0.59331	233593	0.78234	361871	1.41382	229556	0.757195	390126	1.52229	48552.3	-1.48404	229364	0.755983
90	297.661	10.6386	37860.6	44362	0.228629	40203.6	0.08663	29888.8	-0.341091	44665	0.23845	2024.91	-4.22476	79472.8	1.06976	51430	0.441914	82682.8	1.12689	41334	0.126632	3512.18	-3.43026	979.964	-5.27182	64872.3	0.776906	22586.3	-0.74525	50703.6	0.421394	51565.8	0.44572	56421.8	0.575558	22167.6	-0.772243	75022.5	0.986628
91	402.175	10.6413	136095	198162	0.542064	274985	1.01473	218551	0.683348	260891	0.938827	3971.67	-5.09873	307798	1.17736	285811	1.07044	299911	1.13991	121844	-0.159586	2551.15	-5.73732	3209.59	-5.40609	266010	0.96686	243455	0.839034	377929	1.4735	249509	0.874472	430952	1.66291	57101.3	-1.25302	269877	0.987684
92	782.339	10.6439	66469.5	118571	0.83499	224888	1.75844	162533	1.28997	239512	1.84933	1	-16.0204	229231	1.78604	207592	1.64299	242994	1.87015	47169.9	-0.494826	1	-16.0204	1	-16.0204	218128	1.71441	150663	1.18056	419081	2.65647	191875	1.5294	457803	2.78396	18401.5	-1.85287	217872	1.71272
93	380.2	10.6468	491082	684157	0.478365	996458	1.02085	797497	0.699515	949292	0.950888	5072.45	-6.59714	1.0161e+06	1.04901	936930	0.931978	1.08672e+06	1.14594	397288	-0.305777	417.539	-10.1998	4890.5	-6.64984	920881	0.907052	855465	0.800744	1.49614e+06	1.60721	946081	0.946	1.53578e+06	1.64494	210793	-1.22014	943020	0.941325
94	781.339	10.6468	173576	257723	0.57025	430925	1.31187	302384	0.80081	426958	1.29853	1	-17.4052	498711	1.52263	382227	1.13886	460104	1.40639	91542.3	-0.92306	1	-17.4052	1	-17.4052	416546	1.26291	317927	0.873127	816644	2.23414	397342	1.19481	866736	2.32002	36040	-2.2679	426755	1.29784
95	783.328	10.6475	25050.5	40094.7	0.678575	71493.1	1.51297	36593.8	0.54676	60667.9	1.27609	1020.25	-4.61785	45578.5	0.863515	46606.3	0.895686	69541.1	1.47303	13503.8	-0.891474	161.02	-7.28146	1	-14.6126	59587	1.25016	42872.9	0.775229	92490.9	1.88447	50393.2	1.00839	123565	2.30236	3501.92	-2.83862	60959.1	1.283
96	399.155	10.6773	12343.3	30442	1.30233	55214.4	2.16131	27126.6	1.13598	28726.2	1.21864	974.792	-3.66249	53070	2.10417	39919.9	1.69338	30599.2	1.30977	9218.81	-0.421077	622.076	-4.3105	1072.28	-3.52498	47828.6	1.95414	20547.7	0.735246	25236.1	1.03176	35823.8	1.53719	68424.4	2.47078	1713.96	-2.84832	45051.6	1.86785
97	405.164	10.9167	24806.8	34354.9	0.469782	26189.9	0.0782785	21247	-0.223476	18514.2	-0.422098	29324.2	0.24136	18462.6	-0.426124	38938.7	0.65047	43444.2	0.808431	59000.3	1.24999	891.263	-4.79874	42417.8	0.773937	36200.9	0.545291	84270.8	1.7643	46319.3	0.900881	55274.1	1.15587	27032.1	0.123943	22480.4	-0.142062	10698.2	-1.21337
98	531.249	12.0257	26840.3	20172	-0.412051	29866.6	0.154132	35579.5	0.406645	25609.6	-0.0677197	35879.9	0.418775	23200	-0.210275	36163.1	0.430117	42308	0.656527	29744.6	0.148225	17737.8	-0.597574	32123.6	0.259231	34833	0.376053	27982.6	0.0601295	33365.4	0.31395	25615.4	-0.0673922	14489	-0.88944	42527.4	0.663989	38052.4	0.503585
99	570.259	12.2657	32689.4	47716.9	0.545676	56773.3	0.796389	67125.1	1.03803	75372.4	1.20521	62217.4	0.928494	53598.7	0.713374	79815.1	1.28784	79748	1.28663	57385.2	0.811854	50178.4	0.618242	61036.2	0.900842	56407	0.787051	65732	1.00777	66131.8	1.01652	54995	0.750477	63464.3	0.957122	52844.2	0.692921	47319.3	0.533604
100	274.27	12.3096	97985.9	103954	0.0852971	96756.9	-0.0182095	124559	0.346189	105683	0.109099	70185.8	-0.481395	50966.7	-0.943018	66445.1	-0.560411	85910.7	-0.189735	60683.8	-0.691262	61942.4	-0.661647	87334.6	-0.16602	77027.4	-0.347202	84940.4	-0.206123	98608.4	0.0091362	94001.2	-0.0598943	74419	-0.396903	68895.9	-0.508155	78949.5	-0.311643
101	586.257	12.3103	24291.2	13811.4	-0.814574	31176.2	0.360013	23261.2	-0.0625103	225736	3.21613	81894.7	1.75334	69153.9	1.50938	100298	2.04578	225696	3.21588	20858	-0.219833	10929.9	-1.15216	21209.8	-0.195701	21137.7	-0.200617	74922.5	1.62497	96307	1.98721	23827.6	-0.0278012	202640	3.06041	46062.9	0.923171	24168.4	-0.00731303
102	585.243	12.3183	91770.4	58550.7	-0.648342	106808	0.218923	87618.8	-0.0667886	1.03206e+06	3.49135	306940	1.74186	254490	1.47151	369123	2.008	969753	3.40152	49265.5	-0.897452	6649.21	-3.78677	38774.1	-1.24294	78060.1	-0.233443	264544	1.52741	408056	2.15267	70560.6	-0.379165	798414	3.12104	122660	0.41856	96936.6	0.0790136
103	584.258	12.3277	263751	175436	-0.588229	336719	0.352368	229242	-0.202302	2.89803e+06	3.45783	903585	1.77648	716210	1.44121	1.02441e+06	1.95755	2.74723e+06	3.38073	139760	-0.916227	23860.7	-3.46647	127521	-1.04844	214775	-0.296351	786879	1.57697	1.18057e+06	2.16223	198216	-0.412101	2.39336e+06	3.18179	378236	0.520113	289031	0.132049
104	318.274	12.488	75416.9	66428.3	-0.18309	85850.2	0.186933	91640.8	0.281102	87877.4	0.220604	65887.6	-0.194882	34703.8	-1.11979	61470.7	-0.294988	66789.9	-0.175257	52351	-0.52667	50408.5	-0.581221	50385	-0.581892	58556.1	-0.36507	88679.6	0.233715	62191.9	-0.278162	65748.8	-0.197923	64759.7	-0.219792	38187.4	-0.981791	83042.3	0.138959
105	389.166	13.2852	45355.3	66544.5	0.553048	78098.6	0.784025	70698	0.640399	13529.3	-1.74519	31702.9	-0.516656	23677	-0.937787	32294.9	-0.489964	23597	-0.942666	153373	1.7577	527.799	-6.42514	71950.7	0.665738	16131.8	-1.49137	16812.2	-1.43176	21074.2	-1.10579	43828.2	-0.0494118	20610.5	-1.13789	3849.3	-3.5586	42144.1	-0.105942
106	598.288	13.5855	40474.9	32190	-0.330414	55218.7	0.44813	48830.8	0.270764	567303	3.80902	154299	1.93063	52631.2	0.378893	249370	2.62319	782847	4.27363	44338.8	0.131544	1	-15.3047	59509.4	0.55609	35498.3	-0.189275	133211	1.71861	207662	2.35914	71317.7	0.817234	631241	3.96309	39551.8	-0.0332833	40766.8	0.0103667
107	438.166	13.863	28726.7	19602.5	-0.55135	38064.3	0.406046	25950.6	-0.146625	30724.3	0.0969889	26642.1	-0.108681	20041.5	-0.519399	26739.7	-0.103408	14777.7	-0.958966	26631.5	-0.109257	22968	-0.322767	28214.8	-0.0259399	33555.6	0.224162	23411.7	-0.29516	31319.8	0.124682	15192.1	-0.919071	20056.1	-0.518348	32052.6	0.158049	29684.7	0.0473278
108	437.178	13.8779	124035	127804	0.0431862	150865	0.282515	160787	0.3744	136530	0.138473	148442	0.259155	108187	-0.197221	110648	-0.164767	108030	-0.199311	107471	-0.206797	118694	-0.0635007	123041	-0.0116121	145237	0.227665	129665	0.0640379	152448	0.29757	118716	-0.0632324	78296.2	-0.663734	165638	0.417286	107840	-0.20185
109	415.185	13.8892	27515	22738.5	-0.275081	39374.5	0.517044	44749.5	0.701655	50311.1	0.870659	35537.2	0.369111	18007.3	-0.611637	31172.6	0.180063	20096.4	-0.453277	43253.9	0.652612	29636.4	0.107156	36690.3	0.415183	40551.1	0.559526	24787.6	-0.150599	42439.9	0.625206	49613.2	0.850506	18357.4	-0.583853	52948.9	0.944384	29685	0.109519
110	453.146	13.8958	127434	138957	0.124887	158771	0.317191	176693	0.471494	171118	0.425239	154856	0.281172	152573	0.25975	150585	0.240825	146838	0.204473	110955	-0.199778	149681	0.232135	138045	0.11539	158038	0.310523	81545.6	-0.644073	159209	0.32117	134856	0.0816716	109047	-0.2248	182887	0.521204	127714	0.00316008
111	455.187	14.0367	57346.9	65828.3	0.198992	91650.4	0.676426	82538.6	0.525353	23386.9	-1.29402	53064.1	-0.111978	18034.5	-1.66896	36447.5	-0.653894	45307.1	-0.339977	112696	0.97465	13027.3	-2.13818	97597	0.767122	15846.5	-1.85555	25970.8	-1.14283	43141.5	-0.41064	54587	-0.0711576	21119.2	-1.44116	23626.6	-1.27931	33643.9	-0.769369
112	302.267	14.491	36197.7	34797.9	-0.056897	44707	0.3046	35301.9	-0.0361515	36830.2	0.0249886	11287.1	-1.68122	4893.18	-2.88705	12588.4	-1.52381	2214.6	-4.03078	13153.4	-1.46047	6666.85	-2.44082	21480.3	-0.752882	12480.8	-1.53619	8923.83	-2.02016	22704.5	-0.672921	10490.4	-1.78682	16404.5	-1.14181	8257.22	-2.13217	26294	-0.461164
113	467.283	14.9731	41245.3	54885.9	0.412206	52135.7	0.338041	56632.2	0.457393	12397.7	-1.73416	21428.9	-0.944675	49541	0.264392	20472.8	-1.01053	2493.25	-4.04813	31356.8	-0.395452	2866.95	-3.84664	30417.1	-0.439346	37728.6	-0.128571	38443.5	-0.101489	22117.9	-0.899014	41641.7	0.0137978	7343.54	-2.48968	2007.94	-4.36045	42900.3	0.0567583
114	427.2	15.2569	61162.3	102295	0.742024	119184	0.962471	102027	0.738231	94180.4	0.622784	84134.8	0.460061	103974	0.76551	137088	1.16439	155284	1.3442	340328	2.47621	791.166	-6.27252	192793	1.65634	70607.8	0.207184	79596.6	0.380064	99225.6	0.69807	187391	1.61533	104225	0.768988	17948.9	-1.76875	153043	1.32323
115	459.241	15.2719	206463	213720	0.0498422	269057	0.382028	244609	0.244596	228539	0.146558	241238	0.224573	231268	0.163684	272805	0.401989	304022	0.558292	613759	1.57179	3033.62	-6.0887	374266	0.858181	175290	-0.236134	212210	0.0396084	246898	0.258032	337464	0.708852	239655	0.215079	48515.9	-2.08935	353227	0.774715
116	460.232	15.279	59415.2	59930.3	0.0124536	69641.6	0.229117	55085.4	-0.109161	43223.2	-0.459026	64165.9	0.110975	38830.4	-0.613645	66858.1	0.17027	76142.1	0.357864	177318	1.57744	1	-15.8585	104422	0.813522	35761.1	-0.732441	51977.4	-0.192946	64143.9	0.110482	70863.7	0.254216	60017.6	0.0145555	13080.5	-2.18341	78640.8	0.404448
117	481.207	15.288	512802	482357	-0.0883021	591508	0.205995	563758	0.136674	461411	-0.15235	575428	0.166233	494683	-0.0518972	627185	0.290487	727772	0.505084	1.18347e+06	1.20655	11263.1	-5.50873	798800	0.639431	421356	-0.283363	452006	-0.18206	529278	0.0456237	783060	0.610721	551969	0.106185	139748	-1.87557	718089	0.485759
118	482.214	15.2886	141551	117629	-0.267081	168752	0.253577	139168	-0.0244947	111952	-0.33844	171376	0.275836	139455	-0.0215221	192967	0.447028	196001	0.469535	349859	1.30545	2195.59	-6.01057	233212	0.720315	128954	-0.134472	130356	-0.11887	150625	0.0896365	173241	0.291455	165883	0.228838	32206.7	-2.13589	195204	0.463654
119	293.142	15.3296	39577.6	13760.4	-1.52416	44959.9	0.183955	20933.8	-0.918847	43455.9	0.134867	50693.4	0.357113	38111.1	-0.0544732	40800.1	0.0438899	52248.3	0.400699	109186	1.46403	384.923	-6.68397	71394.6	0.85113	21860	-0.856391	43550.6	0.138008	23789.4	-0.734363	48838.8	0.303342	20389.4	-0.956864	7285.39	-2.44161	47954.8	0.276991
120	497.34	15.8241	129122	121714	-0.0852398	130192	0.0119149	129122	1.71921e-06	33192	-1.95982	207275	0.682813	24901.4	-2.37443	127967	-0.0129637	72020.2	-0.842258	134383	0.0576164	31262	-2.04625	156274	0.275346	117578	-0.135112	88714.5	-0.541489	120412	-0.10075	60871.6	-1.08489	12876.9	-3.32587	2950.26	-5.45174	28463.8	-2.18153
121	607.256	16.1404	44494	43948.1	-0.0178106	57153	0.361219	53925.3	0.277352	5051.35	-3.13887	16292.7	-1.44938	36067	-0.302931	20143.5	-1.14329	361.343	-6.9441	15044.5	-1.56437	675.675	-6.04114	15781.7	-1.49536	30738.4	-0.53357	19396.5	-1.19782	17623.5	-1.33611	23096.7	-0.945925	6936.76	-2.68128	197.252	-7.81742	47076.1	0.0813842
122	509.3	16.1431	742207	789632	0.0893584	867997	0.225868	826494	0.155183	106324	-2.80335	411911	-0.849489	580872	-0.353601	418602	-0.826244	1	-19.5015	496743	-0.579323	11615.3	-5.99773	327499	-1.18033	512988	-0.532896	542019	-0.453478	297164	-1.32056	489834	-0.599529	77816.6	-3.25367	21124	-5.13487	555916	-0.416955
123	592.302	16.1478	133717	150730	0.172782	163979	0.294325	150506	0.170635	6958.55	-4.26425	84198	-0.667327	89156.5	-0.584773	75690.5	-0.821	1	-17.0288	84364.7	-0.664473	2908.14	-5.52294	65691.2	-1.02541	100445	-0.412784	95566.7	-0.484604	63419.2	-1.07619	102544	-0.382948	21918.9	-2.60894	5601.54	-4.57722	116427	-0.199754
124	510.292	16.152	271547	277734	0.0325035	311990	0.200302	256857	-0.0802361	19408.2	-3.80646	143940	-0.915729	176496	-0.621564	147464	-0.880837	1230.52	-7.78579	161110	-0.753154	6742.98	-5.33167	113256	-1.26161	177224	-0.615626	200576	-0.437054	107390	-1.33834	163197	-0.734582	30813.6	-3.13956	10564.7	-4.68388	193075	-0.49204
125	591.3	16.152	375206	377706	0.0095819	449603	0.260969	397337	0.0826792	55024.3	-2.76954	212151	-0.822588	283225	-0.405735	210860	-0.831394	158.572	-11.2083	248569	-0.594037	5490.41	-6.09462	186412	-1.00919	275348	-0.446427	296856	-0.337919	156798	-1.25877	269363	-0.478131	52151.2	-2.84691	21869.8	-4.10067	279309	-0.42582
126	511.289	16.2426	94617.9	91260.1	-0.0521295	122691	0.374847	89329.7	-0.0829741	18881.9	-2.32511	57203.3	-0.726014	86278	-0.133121	54264.7	-0.802101	1	-16.5298	61171.5	-0.629255	2108.31	-5.48796	53376.4	-0.825913	61392.6	-0.624048	87376.9	-0.114862	57720.1	-0.713041	64455	-0.553822	19906.3	-2.24889	2860.39	-5.04783	75377.5	-0.32798
127	540.412	19.2297	22914.3	17258.6	-0.408932	43168.4	0.913729	51262.7	1.16166	14844.6	-0.626308	36863.4	0.685941	55225.1	1.26908	37223.4	0.699961	44468.5	0.956536	46117.1	1.00906	42242.1	0.882434	24456.7	0.0939814	52297.9	1.1905	41120	0.843592	38123.9	0.734447	40756.3	0.830776	26698.1	0.220491	25537	0.156339	20362.6	-0.170326
128	374.274	20.6987	263721	253042	-0.0596389	306700	0.217814	307605	0.222067	233331	-0.176635	281258	0.0928794	327938	0.31441	282750	0.100512	282620	0.0998517	317793	0.269073	335954	0.349251	345872	0.391223	277085	0.0713137	317384	0.267216	318207	0.270953	298492	0.178681	291525	0.144607	252939	-0.0602264	234524	-0.169276
129	352.319	20.711	188812	174261	-0.115705	183299	-0.0427559	219208	0.215346	130613	-0.531656	156649	-0.269414	213523	0.177443	116416	-0.697664	201828	0.0961719	236208	0.323108	184888	-0.0302999	221646	0.231308	164997	-0.194514	201426	0.0932986	184224	-0.0354915	179102	-0.0761717	178204	-0.0834183	165925	-0.186422	138843	-0.443494
130	273.17	21.1942	27905.5	21675.9	-0.364455	28273.4	0.0188959	30778.8	0.141388	13221.8	-1.07763	11254.1	-1.31009	33657.7	0.270388	43425.1	0.637981	24885.9	-0.165224	29964.1	0.102687	35695.6	0.355198	43323.1	0.634588	42440.2	0.60488	24165.1	-0.207623	20472.8	-0.446844	32027.2	0.198746	27931.1	0.00132453	22489.4	-0.311304	17253	-0.693701
131	331.275	21.2517	62567.2	73732	0.236884	91836	0.553653	88904.1	0.506843	93839.3	0.584786	99087	0.663289	76839.6	0.296443	83838.8	0.422212	80163.2	0.357533	92964.9	0.57128	129978	1.05478	72617	0.214901	95017.3	0.602784	110228	0.81701	85979	0.458578	91334.2	0.545748	79245.6	0.340924	122302	0.966968	79796.1	0.350911
132	353.269	21.2835	237246	249566	0.0730415	310996	0.390515	253813	0.0973835	146496	-0.695523	243255	0.0360908	287735	0.278358	234657	-0.0158254	161052	-0.558859	140520	-0.755602	93379.1	-1.34521	208017	-0.18968	269004	0.181245	163423	-0.537766	128415	-0.885566	256718	0.113806	210048	-0.175661	306311	0.368617	305513	0.364851
133	282.275	21.42	210622	169100	-0.31678	211435	0.00556314	251454	0.255639	219116	0.0570379	248804	0.240356	199607	-0.0774887	285958	0.441147	212729	0.0143611	218107	0.0503796	305775	0.537817	188390	-0.160935	234557	0.155283	121347	-0.79551	221506	0.0726939	239508	0.185422	171050	-0.300238	214232	0.0245226	177397	-0.247672
134	379.318	21.4451	28683.2	28463.3	-0.0111023	191688	2.74048	222615	2.95628	98867	1.78528	27887	-0.0406137	50175.3	0.80677	95063.8	1.72869	39634.2	0.466539	45705.9	0.672174	238524	3.05585	44039.9	0.618605	42017.6	0.550788	126082	2.13609	51967.8	0.857411	71100.2	1.30965	63789	1.1531	152275	2.4084	176775	2.62364
135	304.234	21.662	31434.4	54323.1	0.78922	55414.9	0.817928	42383.6	0.431158	32507.4	0.0484227	49427.5	0.652968	65140.4	1.05121	67064.4	1.0932	52455.7	0.738754	40650.6	0.370931	118573	1.91536	30839.6	-0.0275624	41492.6	0.400507	45279.5	0.526512	48465	0.624595	57066.8	0.860306	16516.7	-0.928419	46581	0.567394	78427.4	1.31901
136	303.218	21.698	142706	138301	-0.045225	176105	0.303394	173327	0.280452	143908	0.0121034	132112	-0.111278	197604	0.469572	179879	0.333986	110210	-0.372791	164066	0.201231	285837	1.00215	61321.9	-1.21857	164837	0.208001	154091	0.11074	147530	0.0479677	136619	-0.0628845	87828.9	-0.700273	192365	0.430805	204914	0.521974
137	281.233	21.7183	233093	227172	-0.0371195	342752	0.556257	336878	0.53132	189505	-0.298672	192509	-0.27598	335070	0.523559	320867	0.46107	182745	-0.351072	200606	-0.216543	553747	1.24832	138041	-0.755813	239707	0.0403646	237266	0.025599	230430	-0.0165761	242792	0.0588172	133900	-0.799752	279857	0.263787	290260	0.31644
138	376.299	21.987	173342	200319	0.208681	205506	0.245562	261590	0.593692	130541	-0.409116	149544	-0.213045	246361	0.507155	183638	0.0832464	140551	-0.302523	172460	-0.00735336	306962	0.824444	144016	-0.267384	186124	0.102649	256822	0.56715	201008	0.213636	188152	0.118284	137320	-0.336078	227821	0.394286	179194	0.0479055
139	481.334	22.1146	41590.4	39550.6	-0.0725533	63211.3	0.603932	68778.3	0.725702	42086.2	0.0170962	30013.3	-0.470649	64563.8	0.634474	65495.4	0.655142	40596.5	-0.0348955	21613.3	-0.944331	92856.7	1.15875	39890.1	-0.060219	44230.7	0.0887973	61420.7	0.562473	44049	0.0828581	65281.7	0.650428	27236.9	-0.610691	47805.5	0.200926	47680.9	0.197161
140	456.449	22.2391	70063.9	43649.5	-0.682705	59108.7	-0.2453	70824.5	0.0155791	54668.1	-0.357972	9868.08	-2.82783	2448.73	-4.83857	3626.79	-4.2719	7523.5	-3.21919	8205.94	-3.09393	8286.71	-3.0798	6498.7	-3.43045	8921.43	-2.97332	13324	-2.39464	6182.66	-3.50237	7859.74	-3.15612	5169.48	-3.76058	10671.9	-2.71486	11871.6	-2.56116
141	334.281	23.0759	88732.6	18094.6	-2.29391	73569.1	-0.270364	51362.6	-0.788747	45256.5	-0.971341	18194.7	-2.28595	135136	0.606874	80058.3	-0.148413	77365.3	-0.197778	98978.8	0.157655	70476.7	-0.332319	97717.1	0.139146	60928	-0.54236	118760	0.420517	63448.4	-0.48388	84137.5	-0.0767164	48490.4	-0.871765	101161	0.189112	72433.3	-0.292811
142	356.281	23.2898	60760.3	58877.2	-0.0454206	112578	0.889721	90901.2	0.581169	47665.6	-0.350182	29698.4	-1.03275	73037.7	0.265511	91661.5	0.593185	40079	-0.600284	52654.1	-0.206584	114658	0.91613	37164.5	-0.709204	40244	-0.594357	65116.9	0.0999017	34974.5	-0.796828	60801.9	0.000986857	27404.2	-1.14873	129364	1.09023	44797.3	-0.439717
143	283.25	23.3736	48534.3	66026.3	0.444036	125013	1.365	97371.5	1.0045	81015.6	0.739195	76400	0.654567	106172	1.12933	128124	1.40047	70425.6	0.537094	49079.8	0.0161257	330197	2.76625	48927	0.0116252	58162.6	0.261087	115098	1.24578	83366.6	0.780464	107800	1.15129	64210.3	0.403799	146560	1.59442	86600.5	0.835371
144	311.272	23.8049	39040.4	43021	0.140073	49347.8	0.338019	50806.1	0.380033	32273.3	-0.274629	36023.2	-0.11604	86230.1	1.14322	56686.4	0.538035	58971.5	0.595051	47512.4	0.283337	50733.4	0.377968	47573.4	0.285188	65673	0.750333	60359.2	0.628605	42854.4	0.134475	48487.2	0.312637	49262.3	0.335516	45189.5	0.211019	37260.2	-0.067331
145	310.3	23.8157	284108	249456	-0.187652	270708	-0.069705	234098	-0.279326	173942	-0.707835	210707	-0.431201	352933	0.312954	279945	-0.0212976	277452	-0.0342026	265119	-0.0998	298742	0.0724578	314151	0.14502	298575	0.0716557	338323	0.251963	209835	-0.437188	248209	-0.194882	267546	-0.0866556	218217	-0.380675	172782	-0.717484
146	381.287	23.818	107534	134577	0.323643	84662	-0.344999	91800.3	-0.228215	92133.2	-0.222994	130229	0.276268	121052	0.170837	125569	0.223694	114289	0.0878971	124095	0.206658	235236	1.12932	121419	0.175213	132479	0.300973	160506	0.577843	102266	-0.0724553	135977	0.338578	92958.6	-0.210126	132872	0.305254	117908	0.132875
147	523.33	24.3431	72726.7	71496.6	-0.0246114	128909	0.825793	115824	0.671383	102815	0.499498	79304.5	0.124917	130133	0.839434	125428	0.7863	122828	0.756085	104374	0.521204	155664	1.09788	104422	0.521865	98229.2	0.433666	122699	0.754567	103521	0.50936	120177	0.7246	101060	0.47465	115076	0.662032	90041.3	0.308102
148	337.324	24.4517	171020	143029	-0.257862	119982	-0.511342	158039	-0.113887	115102	-0.571248	126368	-0.43654	192644	0.171768	132658	-0.366457	138374	-0.305596	163285	-0.0667772	137278	-0.31707	168284	-0.0232676	113116	-0.596364	175433	0.0367554	111245	-0.620422	140551	-0.283072	140116	-0.28754	123260	-0.472461	99286.6	-0.784495
149	336.317	24.4543	688150	637048	-0.111322	518623	-0.408037	602029	-0.192891	410355	-0.745852	478975	-0.522774	776594	0.174437	554784	-0.310797	571879	-0.267014	691599	0.00721166	641377	-0.101552	650332	-0.0815477	568408	-0.275797	717301	0.0598547	471670	-0.544945	612384	-0.168287	616383	-0.158897	546400	-0.332765	473454	-0.539498
150	358.308	24.4689	218066	197219	-0.144965	174585	-0.320833	208302	-0.0660858	170328	-0.356448	157146	-0.472655	258263	0.244074	209169	-0.0600987	149951	-0.540274	156172	-0.481632	174235	-0.323734	225915	0.0510177	219625	0.01028	256297	0.233049	155853	-0.484578	206297	-0.0800427	195531	-0.157369	93080.1	-1.22822	150487	-0.535127
151	295.283	25.1052	9631.43	1283.35	-2.90784	59398.8	2.62461	58263	2.59676	26290.5	1.44872	3180.01	-1.59872	21920.2	1.18644	60925.6	2.66123	4907.96	-0.972627	9078.37	-0.0853159	79125.5	3.03832	10076.6	0.0651903	12174.6	0.338056	18168.3	0.915606	6710.41	-0.521349	10781.9	0.162784	22385.9	1.21677	63750.6	2.72662	58080.9	2.59224
152	512.497	25.7703	403892	225195	-0.842794	284382	-0.506142	385325	-0.0678962	372377	-0.117206	99699.3	-2.01832	51030.2	-2.98455	109368	-1.88478	123675	-1.70742	115581	-1.80507	126909	-1.67017	142466	-1.50336	176619	-1.19333	213836	-0.917468	146468	-1.46339	152838	-1.40197	126410	-1.67586	129916	-1.63639	199697	-1.01616
153	429.242	25.8132	35261.3	39118.5	0.149762	43034.7	0.287413	38369	0.121854	56954.2	0.691715	22585.7	-0.642677	43134.8	0.290765	39643.6	0.168999	57333.3	0.701286	37154.9	0.0754666	38161.9	0.114045	48236	0.452024	43433.7	0.300726	49296.4	0.483393	42230.4	0.260196	45610.9	0.37129	18756	-0.910736	41024.5	0.218397	37881.4	0.103402
154	436.335	25.8141	22429	31834.6	0.505233	25878.3	0.206377	24709.3	0.13969	25796.6	0.201817	32842.1	0.550182	30009.8	0.420068	15986.2	-0.488534	25407.6	0.179895	28782.2	0.359811	14945.5	-0.585653	26365.2	0.233272	24726.3	0.140682	32112.1	0.517752	33011	0.557583	24536	0.129533	26841.4	0.259095	29493.1	0.395012	28353.3	0.338153
155	391.27	25.8329	109323	87695.3	-0.318023	106683	-0.0352657	122990	0.169949	90926.6	-0.26582	76040.4	-0.523756	128611	0.234424	88684.9	-0.301833	101390	-0.108676	110633	0.017182	111227	0.0249118	83784.5	-0.383839	92926.4	-0.234434	105932	-0.0454581	111585	0.0295447	115542	0.0798199	94579.4	-0.208996	114663	0.0688046	88191.6	-0.309881
156	413.249	25.8335	226572	276673	0.288213	281456	0.312944	303267	0.420621	271503	0.260999	307199	0.439204	333011	0.555601	318813	0.492744	294039	0.376038	285039	0.33119	297048	0.390729	257488	0.184538	284558	0.328753	280347	0.307246	288714	0.349674	278700	0.298746	252537	0.156526	297425	0.392556	279328	0.301993
157	414.255	25.8347	47106.2	62467.6	0.407192	76955.5	0.708108	52489.3	0.156108	56886.2	0.272163	36043.6	-0.386173	83209.2	0.820827	65028.9	0.465165	82416.1	0.80701	59358.4	0.333537	78743.1	0.741238	40510	-0.217639	76149.6	0.692921	75179.3	0.674419	77567.5	0.719536	58343.6	0.308659	69475.9	0.560596	65197.1	0.468891	75370.2	0.678079
158	339.357	26.1742	2.62148e+06	2.68266e+06	0.0332815	2.65453e+06	0.0180751	2.8579e+06	0.124573	2.31811e+06	-0.177433	2.5903e+06	-0.0172605	3.19923e+06	0.287343	2.88408e+06	0.137728	2.86957e+06	0.130452	2.88874e+06	0.140061	3.15338e+06	0.26652	2.73895e+06	0.0632391	2.65577e+06	0.018749	2.86956e+06	0.130449	2.55945e+06	-0.0345497	2.65584e+06	0.018786	2.67761e+06	0.0305644	2.77466e+06	0.0819312	2.46822e+06	-0.0869097
159	338.331	26.1746	1.08328e+07	1.06466e+07	-0.0250073	1.09266e+07	0.0124349	1.11178e+07	0.03747	9.29234e+06	-0.221292	9.9432e+06	-0.123623	1.23192e+07	0.185497	1.15443e+07	0.0917797	1.14793e+07	0.0836232	1.15657e+07	0.0944434	1.23321e+07	0.187018	1.15141e+07	0.0879953	1.0657e+07	-0.0236057	1.16428e+07	0.104033	9.94371e+06	-0.123549	1.0813e+07	-0.00263319	1.08049e+07	-0.00372131	1.07734e+07	-0.00792612	9.51591e+06	-0.186992
160	340.3	26.1795	134866	179001	0.408447	187432	0.474842	133611	-0.0134895	108561	-0.313016	173075	0.359876	120966	-0.156928	134853	-0.000135151	184481	0.451944	185476	0.459711	191695	0.507288	145746	0.111934	175074	0.376437	178895	0.407591	228487	0.760585	137355	0.026383	164390	0.285594	138834	0.0418408	87151.1	-0.629933
161	360.3	26.1883	2.78174e+06	2.69484e+06	-0.0457866	2.68884e+06	-0.0490055	2.73326e+06	-0.0253632	2129688	-0.385346	2.30901e+06	-0.268717	3.26368e+06	0.230513	2.73589e+06	-0.0239786	2.58157e+06	-0.107741	3.03114e+06	0.123874	2.94737e+06	0.0834417	2.95111e+06	0.0852681	2.68324e+06	-0.0520109	3.01021e+06	0.113876	2.42527e+06	-0.197844	2.62315e+06	-0.0846902	2.63517e+06	-0.0780913	2.55197e+06	-0.124377	2.09396e+06	-0.409752
162	361.316	26.1885	658611	659748	0.00248938	631592	-0.060434	725192	0.138938	539843	-0.286885	604652	-0.123321	808518	0.295853	727815	0.144146	704777	0.0977406	764049	0.21424	726021	0.140585	757298	0.201436	682801	0.0520383	786652	0.256299	620153	-0.0868017	672408	0.0299099	677346	0.0404676	622276	-0.081871	572807	-0.201376
163	676.685	26.1923	1.79084e+06	1.52086e+06	-0.235752	1.33497e+06	-0.423827	215095	-3.05759	1.19235e+06	-0.586828	1.09907e+06	-0.704356	202025	-3.14803	1.39572e+06	-0.359633	1.45278e+06	-0.301819	1.69745e+06	-0.0772703	1.68779e+06	-0.0854997	312841	-2.51713	1.5288e+06	-0.228239	236811	-2.91883	1.36085e+06	-0.396124	1.74185e+06	-0.040014	1.70081e+06	-0.0744181	90417.7	-4.30789	30954.2	-5.85436
164	362.294	26.1923	60528.6	65613.4	0.116373	84238.3	0.47686	63379.6	0.0664021	42007.8	-0.526959	24105	-1.32829	87643.1	0.534024	36328.2	-0.736526	69310	0.195447	84838	0.487095	51792.2	-0.224883	55687.7	-0.120257	71709.4	0.244545	83849.2	0.47018	63822.4	0.0764471	51752.1	-0.226	70129.2	0.212398	39804.8	-0.604675	29134.4	-1.05489
165	675.694	26.196	3.57745e+06	3.06065e+06	-0.225092	2.76674e+06	-0.370744	3.01838e+06	-0.245155	72681	-5.62121	2.3097e+06	-0.631222	3.63182e+06	0.0217615	2.49629e+06	-0.519144	3.04479e+06	-0.232588	3.29644e+06	-0.11802	3.97563e+06	0.152254	3.90387e+06	0.125976	3.32149e+06	-0.107099	4.12692e+06	0.206136	2.72596e+06	-0.392166	3.47095e+06	-0.0435999	3.46569e+06	-0.0457882	238231	-3.9085	2.69321e+06	-0.409604
166	677.674	26.1982	292201	353131	0.273241	281552	-0.0535577	294307	0.0103637	249811	-0.226123	286113	-0.030373	408480	0.483304	364409	0.318597	342719	0.230067	376044	0.363941	97341.3	-1.58584	507045	0.795154	364080	0.317295	318748	0.125454	223263	-0.38822	405699	0.473449	348266	0.253231	315069	0.108706	141858	-1.04251
167	376.279	26.2029	129523	166649	0.363601	171587	0.405732	173579	0.422381	145573	0.168529	125210	-0.0488628	184641	0.511515	143358	0.146406	155337	0.262188	168627	0.380622	170855	0.399565	187675	0.535026	147760	0.190042	170752	0.398692	162563	0.327789	145378	0.166595	107513	-0.268695	145417	0.166984	136873	0.0796291
168	341.354	28.3043	56137.3	31286.3	-0.843431	49241.4	-0.189087	43393.1	-0.371494	38955.6	-0.527127	47240.9	-0.248924	57084.3	0.0241334	54103.7	-0.0532331	34507.5	-0.702049	43340.3	-0.373251	27007.5	-1.0556	45814.4	-0.29316	21841.2	-1.36191	40191.9	-0.482054	46103.7	-0.284078	36937.5	-0.603875	52517.2	-0.0961701	45423.5	-0.305521	18165	-1.6278
169	366.379	28.4467	525093	521623	-0.0095648	659256	0.328267	649497	0.306751	624366	0.249821	461210	-0.187148	620093	0.239913	684112	0.381661	630418	0.263738	572181	0.1239	926810	0.819702	579387	0.141956	541507	0.0444077	676882	0.366333	459501	-0.192503	571202	0.121429	715252	0.44588	718499	0.452414	533076	0.0217689
170	367.371	28.4644	130763	127689	-0.0343176	180360	0.463927	181533	0.473279	154705	0.242568	105604	-0.308284	145272	0.151804	183450	0.488434	156341	0.257741	162470	0.313215	256056	0.969505	154597	0.241557	150734	0.205049	173041	0.404161	96317.6	-0.441083	142345	0.122434	184649	0.497828	195475	0.580029	69552.5	-0.91078
171	388.337	28.5178	64202.5	89703	0.482527	225497	1.81241	207123	1.68979	245883	1.93727	66487.2	0.0504479	76914.9	0.260634	239768	1.90094	164907	1.36096	92345.9	0.524418	362320	2.49656	100158	0.641575	70921.1	0.143586	160474	1.32164	98729.2	0.620847	125891	0.971474	253574	1.98171	264244	2.04117	189056	1.55811
172	389.345	28.5439	13291.2	8607.07	-0.626878	49665.5	1.90177	57732.3	2.11891	62031.5	2.22253	8944.68	-0.571371	10924.9	-0.282857	54710.7	2.04135	36014.8	1.43812	12785.6	-0.0559532	98145.3	2.88445	19576.4	0.558644	14487.4	0.124321	37314.5	1.48926	25493.3	0.939643	35620.3	1.42223	71739.4	2.43229	56805.3	2.09555	41491.7	1.64235
173	359.2	30.7166	237364	537534	1.17925	420212	0.824015	174317	-0.445391	442301	0.897924	660641	1.47676	304207	0.357949	664468	1.4851	313579	0.401727	451474	0.927538	584986	1.3013	420585	0.825292	417439	0.814463	462831	0.963381	672260	1.50192	586101	1.30405	617344	1.37897	502698	1.08259	410218	0.789288
174	382.296	36.663	51728.1	56641.5	0.130913	40975.6	-0.336184	51745	0.000471513	52395.8	0.0185021	31170.7	-0.730756	34151.1	-0.599017	29784.1	-0.796407	31447	-0.718024	22563.6	-1.19695	22805	-1.1816	38333.9	-0.432326	40485.7	-0.353536	43509.5	-0.249616	49975.6	-0.0497244	53720.3	0.0545192	57952.7	0.163929	60061.3	0.215489	53150.9	0.0391473
175	349.131	36.823	28917.2	13688.4	-1.07897	30048.7	0.0553766	24773.5	-0.223133	32265.7	0.158074	24881.5	-0.216855	27597.7	-0.0673778	27185.8	-0.0890766	26069.7	-0.149552	23387.4	-0.306199	32210.9	0.155623	34401.6	0.250549	28612.4	-0.015287	26446	-0.128878	30189.4	0.062114	11877.6	-1.28369	22404.4	-0.368145	22794	-0.343271	15246.7	-0.923428
176	391.022	36.8573	21326.8	10320.8	-1.04711	16127.6	-0.403136	18424.7	-0.211027	19206.9	-0.151044	11226.8	-0.925714	22700.7	0.0900691	14619.8	-0.544745	15635.3	-0.447863	20830.9	-0.0339439	14339.1	-0.572717	20844.7	-0.0329861	11603.5	-0.878104	10053.2	-1.08501	14312.5	-0.575387	21784.5	0.0306366	16885.8	-0.336853	20777.5	-0.0376417	15756.7	-0.436701
177	261.085	36.875	113756	118037	0.0532976	101007	-0.171476	106365	-0.0969081	124838	0.134121	133047	0.225999	138665	0.285662	138002	0.278748	124099	0.125556	125419	0.140819	146698	0.366916	112820	-0.0119183	122801	0.11039	127149	0.160577	120219	0.0797314	121706	0.0974586	119238	0.0679087	130503	0.198143	109325	-0.0573104
178	152.104	36.893	56506.8	95255.4	0.753376	57368.6	0.021838	101101	0.839303	91808.8	0.700209	92495.5	0.710959	95392.5	0.755452	77450	0.454841	67403.1	0.254392	75133.3	0.411029	111901	0.985723	48210.2	-0.229085	112264	0.990395	80948.5	0.518581	108321	0.938818	109931	0.960103	79303.8	0.488966	83126.6	0.556887	100620	0.832425
179	203.032	36.964	17404.1	19469.7	0.161809	11856.7	-0.553715	9997.7	-0.799756	16207.6	-0.102755	26612	0.612651	25666.8	0.560481	28949	0.734089	22726.7	0.384966	26883.4	0.627293	19271.9	0.147077	11942.6	-0.543308	23695.7	0.445201	18586.7	0.0948472	25669.8	0.560648	21072.2	0.275918	7254.2	-1.26254	14505.1	-0.262864	22503.4	0.370717
