# Supplementary material for: CsdA-LaeB hub governs Aspergillus fumigatus virulence via FqC biosynthesis
Source: Research Square preprint supplement (doi:10.21203/rs.3.rs-6615529/v1), 2025-06-12
Supplement: Supplementary file 6 [file e9f89751c5c0f21587011a8e.xlsx]

## Sheet: Total ions(WT vs singal mutants
Supplementary Table 3 - High-resolution mass spectrometry data of Aspergillus fumigatus mutant strains.
Total ions (5081)
	m/Z	Re time	A. fumigatus CEA17.1-1	A. fumigatus CEA17.1-2	ΔlaeB-1	ΔlaeB--2	ΔcsdA-1	ΔcsdA-2
1	688.313	37.6715	330494	234747	172415	87623	334767	273473
2	905.396	36.5466	88927.2	50670.5	57805.9	62412	67107.3	73115
3	461.246	47.7134	4.83047e+06	3.07618e+06	2.27516e+06	1.78228e+06	3.16726e+06	2.29868e+06
4	429.221	47.7131	1.56487e+06	1.05625e+06	1.17253e+06	659348	1.57216e+06	850701
5	299.14	39.7056	106545	62980.5	41516.4	27906	91450	33431
6	357.162	42.902	104937	50172.1	26480.9	32330.8	110070	56401.8
7	259.127	16.4194	27475.9	40344.3	31555.7	28039.3	61958.4	19526.3
8	1422.67	47.6929	62872.7	47285.5	36344.3	26332.8	48083.1	36998.8
9	579.284	47.6745	88688.1	68086.6	61939.9	58103.6	68505.3	63702.4
10	467.135	42.9524	229888	135713	126803	99609.8	130190	96776.3
11	1421.67	47.6919	169104	127144	101903	76622.8	118193	105091
12	328.193	36.2261	172203	128383	101241	95462.6	187131	128518
13	1074.42	47.6743	79250.1	67207.5	45918.4	39681	82676.8	54939
14	239.092	16.8087	71693.6	48546	32112.3	34485	79655.1	28912.4
15	258.124	36.2249	125990	88859.7	68968.8	67012.1	141652	103319
16	528.127	19.7517	106911	115903	72398.7	45845.6	86011	71239.4
17	667.454	39.5818	27980.4	26538.7	17143.6	16059.9	32015	22274.9
18	346.137	33.1074	108222	72212.3	41130.8	30664.7	92062.3	50248.4
19	637.346	48.5504	57559.3	50924	53819.4	33541	104200	70191.3
20	1201.54	47.6911	87529.5	54671.7	44324.6	40724.6	56944.8	52649.1
21	326.151	35.8777	6.41033e+06	4.45538e+06	3.55405e+06	3.21241e+06	6.94606e+06	4.63764e+06
22	636.317	49.9627	60260.1	61915.3	19807.9	31645.7	77852.6	36898
23	988.269	37.5137	25162.2	17396.7	17195.1	9626.58	24961.1	23192.1
24	300.132	39.163	99580.9	49919.5	92824.8	40406.4	131469	46821.9
25	1420.67	47.6887	340154	244518	197906	154750	229807	201795
26	459.241	47.6904	4.35093e+07	4.03295e+07	3.01828e+07	2.69466e+07	3.81368e+07	3.15184e+07
27	501.232	25.0814	419587	311607	131808	50471	140437	61158.8
28	1419.66	47.691	376589	265014	227278	174034	246617	227263
29	270.125	36.2126	97143.2	68223	52803.2	44001.5	108127	72117.6
30	117.054	2.83797	62578.9	52939.9	37883.6	32887.9	47800.8	52776.2
31	282.28	54.392	243160	222922	88960.7	135302	110470	176609
32	573.162	55.0049	0	6184.81	6716.98	10480	1750.16	9062.55
33	327.154	36.216	1.34065e+06	942576	758858	686444	1.45328e+06	998019
34	464.184	32.8277	239728	131416	76639.5	64683.9	65368.5	41995.9
35	247.061	20.1762	217640	140328	48956.6	115338	89173.6	241232
36	354.145	25.7513	99493.3	47796.1	11965.8	22280.5	30724.7	40744
37	476.193	36.2238	109545	56593.5	73810.6	56857.2	51654.6	22137.4
38	430.221	47.7681	328250	211529	261591	228488	254539	173782
39	336.172	49.9884	839096	358479	101006	182849	1.56492e+06	494974
40	1073.42	47.675	133291	105254	82593	63405.8	88549.9	89330.7
41	443.239	47.6883	359316	262464	95190.1	169078	345406	272012
42	1202.04	47.6927	121349	78098.2	67901.5	57819.9	72477.7	73763.3
43	500.203	25.0897	1.5019e+06	1.06091e+06	431476	148768	464724	199551
44	689.317	37.7045	64384.3	43265.2	55272.2	42868.4	142905	117174
45	248.173	47.6748	101101	68463.1	40238.1	33470.6	61127.5	48170.5
46	627.251	19.755	0	0	0	0	0	0
47	142.065	36.2199	44396.5	30161	21246	21381.7	66799.5	48823
48	226.123	12.2528	26116.5	18730.7	18296.7	16071.7	42026.8	28350.3
49	299.14	45.7225	21031.1	81716.7	46729.8	24795.7	46791.7	26473.1
50	666.192	19.7501	0	0	0	0	0	0
51	265.015	63.3923	23292.5	19351.4	22147.9	18507	22151.2	21099.1
52	963.44	47.6883	138633	98799.5	107789	101556	130122	114890
53	237.185	42.6325	274881	166795	167506	143725	190513	150419
54	331.106	31.6886	85238.5	72914	16132.8	16789.6	87679.5	22303.3
55	835.309	38.5059	94124.3	44760.7	5594.34	5765.2	14928.9	18835.1
56	873.242	36.4815	17255.2	13071.8	3308.46	15878	34852.8	27351.8
57	279.948	64.0776	43841.1	39595.5	36015.6	37080.8	33802.3	39087.7
58	567.335	51.3408	428013	237245	237178	197791	349393	328373
59	1220.56	48.5524	20077.2	5293.48	5513.77	4047.95	27043.2	14173.1
60	356.162	42.9371	644463	192271	86079.1	108152	420996	206335
61	582.326	57.0341	12347.2	0	7600.61	18758	0	6922.72
62	444.68	19.7501	0	0	0	0	0	0
63	257.593	33.1131	0	0	489.507	0	2310.93	2597.77
64	497.303	52.9519	254950	121601	110794	105373	237520	423035
65	959.43	47.6803	124952	82397.1	60367.2	56313.8	85156.7	88665.1
66	653.229	19.7475	0	0	0	0	0	0
67	237.079	33.1135	4707.79	9258.22	10972.5	11171.3	23406	22142.9
68	256.264	54.2378	67796.8	67918.7	38610.2	52723.3	51367	60400.3
69	809.389	50.0452	40529.2	34182.9	12056.5	12914.8	36880.3	48933.3
70	668.199	19.7501	0	0	0	0	18510.1	7989.88
71	662.137	22.9303	42503.2	51722.3	31983.3	22405.9	45646.8	26863.6
72	519.133	39.239	0	0	1412.36	731.919	13121.8	9455.62
73	986.365	19.7635	0	15050.1	0	0	13357.3	2436.02
74	1023.29	28.2871	107686	190254	141125	127734	153345	159744
75	918.379	19.7501	0	0	0	0	0	0
76	462.178	32.8277	2.04145e+06	927251	1.43999e+06	1.19412e+06	1.22425e+06	765712
77	199.087	34.489	131713	220570	352489	292667	554868	447072
78	561.205	51.3027	27183.4	22964	29516.2	24434	34959.7	31370.2
79	623.194	19.7475	0	0	0	0	5625.51	2302.32
80	904.323	19.7501	0	0	0	0	0	0
81	797.238	36.4753	68077.7	0	57714.8	61108.7	116759	85729.8
82	196.112	42.6176	178814	76339.5	18293.6	28103.7	246575	51750.1
83	569.147	38.454	12022.7	10162.2	10020	19487.7	44644.2	14181.7
84	622.195	19.7538	0	0	0	252.534	24523.8	9757.29
85	738.275	39.2415	6043.85	4275.58	1863.59	570.508	13140	8625.51
86	932.352	29.9349	25619.2	16293.3	4058.18	4189	20668.5	9190.21
87	506.949	64.0865	38792.1	39659.3	40714.2	41414.2	44398.8	47521
88	652.227	19.7467	0	11347.7	0	0	28616.2	20243.4
89	237.572	46.2983	0	663.547	0	243.041	5399.67	15426.8
90	965.273	37.3193	76983.5	46351.5	17729	13947.8	32990.3	23882.8
91	934.356	19.7501	0	0	0	0	0	0
92	836.312	38.6151	36792.8	0	5688.42	4349.82	9905.63	10349.3
93	1033.31	16.9856	5748.48	9006.71	5466.5	11091	12987.4	9209.38
94	216.566	33.1135	0	440.91	1026.73	0	7402.61	8104.91
95	931.349	29.9284	138787	13927.2	5697.34	7364	36689	15480.6
96	282.204	44.8861	78939.7	62451.6	27640.6	30496	77136.7	14516
97	714.37	37.0167	22989.9	19199.8	21587.3	21374.1	18225.4	5542.45
98	655.243	19.7538	0	0	0	0	0	0
99	636.75	37.7341	21114.7	2706.54	275.672	0	16007.2	16808.5
100	443.954	64.0436	20520.9	22017.9	19631.8	23342.7	24102.6	25372.1
101	855.409	48.7405	59059.2	34857.9	18967.6	14565.1	93766.3	25850.8
102	842.357	39.2376	2326.72	1696.94	296.109	0	3202.34	594.764
103	824.292	34.5987	470.314	1984.35	41234.3	35982.6	182815	109860
104	240.161	22.5976	74922.5	48395.8	9673.14	7144.34	59702.2	34008.8
105	658.237	22.8494	1358.94	298.563	5456.45	3747.34	25192.4	13147.1
106	543.417	51.7936	229507	62663.2	235260	159403	167557	219356
107	1417.47	34.5012	0	0	8268.87	4913.77	27699.7	27304.7
108	222.193	46.5117	58668.8	51421.9	17334.3	13502.4	26901.1	14152
109	913.022	34.4876	0	207.227	2657.28	4543.87	27545.7	23384.2
110	945.266	28.2992	500891	374852	270178	178044	344401	242133
111	824.343	39.2376	4903.23	7389.46	686.284	615.982	15260	7584.11
112	1108.43	46.2977	2806.39	749.563	609.355	0	22712.4	12308.5
113	531.139	37.2713	52934.2	807.091	16233.3	36718.6	21031.8	33349.1
114	1421.45	34.5025	0	0	18592.1	19100.7	39817.2	49939.5
115	1043.29	37.3002	41882.6	31179.6	38969	64162.2	96008.5	25977
116	746.379	50.0064	82603.2	59441.6	11258.1	11956.3	135100	31387.2
117	586.246	19.7501	0	0	0	0	0	0
118	826.36	39.2415	4768.41	4431.72	494.787	874.016	12014.4	8749.03
119	905.326	19.7538	0	0	0	0	0	0
120	825.295	34.6046	220.274	613.776	23818.6	18739.4	95968.3	60516
121	399.164	42.0072	616360	428989	425113	321963	581441	951749
122	153.058	2.82865	164076	197428	76323.2	45269.2	148734	101921
123	242.119	42.8714	35348	24059.1	13230.4	14618.2	23050.5	13755
124	266.184	44.8861	157350	126495	41476.5	47102	137332	17831.8
125	336.167	24.5716	2.22114e+06	1.62978e+06	702643	476777	1.39346e+06	846803
126	374.148	48.8353	123351	67343.5	25511.7	78653.5	311768	125209
127	270.113	43.0221	92479.1	72191.8	98580.3	175572	106951	70761.3
128	1420.45	34.5025	0	276.951	21574.5	19818	44365.6	52589
129	239.2	42.1174	28987	15720.4	13440.6	16521.7	75028.2	12465.1
130	200.148	32.1736	114822	37722.9	25411.9	20492.9	46826.8	29725.1
131	1382.45	34.501	0	0	37385.7	25798.2	66908.3	69781.7
132	479.133	33.1135	0	1490.88	3066.35	700.992	21709.6	18165
133	337.17	24.5712	426006	305126	141330	97523.8	261681	166374
134	398.161	42.0074	2.49483e+06	1.71223e+06	1.75796e+06	1.32701e+06	2.43924e+06	3.9457e+06
135	919.382	19.7475	0	0	0	0	0	0
136	1383.45	34.495	0	0	17486.5	14091.6	34637.1	34983
137	710.309	49.9482	40334.2	23163.2	22514.5	17489.6	138697	53962.3
138	809.328	37.3201	63873.8	42694.4	14633.3	17985.3	49370.5	22213.4
139	1356.48	34.4865	0	0	16807.4	16235.1	60512	41807.9
140	463.181	32.8277	611676	90807.1	411540	348423	349832	225983
141	773.374	48.5354	33338.9	12727.1	15079.3	14787.4	24145.3	24360.1
142	621.192	19.7496	0	5698.14	0	0	66316.4	46459.6
143	951.945	47.6917	70144.2	47359.2	44394.2	39740	34534.9	46005.8
144	1046.29	34.5008	0	564.13	138887	148286	231455	306309
145	257.066	2.91506	33343.8	24002.6	33827.8	34301	38998.8	39297.4
146	234.086	22.3994	35166.5	22572.6	43702.9	45316.8	119368	77521.9
147	587.244	19.7609	0	0	0	0	0	0
148	1355.48	34.4865	0	0	59966.3	51115.9	202121	137260
149	1045.28	34.5006	0	956.106	227275	247260	384945	500765
150	1067.4	47.6803	41285.2	32916	10482.8	7392.87	41728	31130.1
151	442.232	47.9093	1.44783e+06	881629	708845	498324	854793	612288
152	1927.63	34.489	0	0	28235.4	23086.4	94832.6	66069
153	225.991	63.4152	44819.9	38934.9	34186.2	35548.7	36899.2	40461.3
154	944.469	47.7078	336706	243876	114675	72968	268225	130204
155	173.961	63.2885	63012.1	59231.9	67160.2	64093	65719.9	61701.7
156	1094.49	39.4643	5106.41	3922.12	248.453	0	2752.7	726.894
157	533.292	46.5859	348363	210551	267767	250816	224682	274010
158	667.196	19.7526	0	13936.2	0	0	65381.8	51115.9
159	1121.23	37.4808	38017.2	40686.6	41040.4	24391.5	44299.5	50607.3
160	1354.47	34.4865	0	0	171546	153787	593151	411233
161	369.154	35.6705	149115	115424	58097.2	42891.4	122036	172077
162	484.237	47.8837	299797	217260	314664	268029	267105	266024
163	366.135	42.0065	1.87639e+06	1.3238e+06	1.33849e+06	1.01984e+06	1.87149e+06	3.06893e+06
164	1352.47	34.4876	0	0	431273	357679	1.49548e+06	1.03423e+06
165	1353.47	34.4865	0	0	377091	322428	1.32659e+06	898118
166	217.107	16.8145	291594	131594	50854.4	60957.5	26135.7	26295.1
167	1378.97	34.501	0	210.05	16088.5	11282.4	39591.2	33180.6
168	1379.97	34.501	0	0	34218.5	19146.6	69571.1	58097.3
169	515.099	36.4878	280276	166493	44546.9	49527.9	57694.5	52637.4
170	1131.39	34.5008	0	0	95152.1	79350.4	175034	182647
171	147.08	47.6846	160364	111004	72639.2	61708.5	98893	78864.5
172	943.466	47.6986	1.10732e+06	802165	355996	235758	843088	427675
173	1132.39	34.5003	0	0	42200.8	34058.7	72172.4	77565.9
174	427.213	47.6905	2.75605e+07	1.94835e+07	1.2708e+07	1.07454e+07	1.77888e+07	1.32201e+07
175	910.311	34.4884	4024.13	13929.4	1.35975e+06	1.11925e+06	3.56113e+06	2.86043e+06
176	911.314	34.4877	0	5421.17	415288	344447	1.08671e+06	843327
177	1926.63	34.4879	0	0	35569.5	34295.2	103501	71726.4
178	909.309	34.4891	12838	22231.9	2.39764e+06	1.99953e+06	6.39672e+06	5.11908e+06
179	312.947	64.0832	78161.7	79365.6	84417.3	97323.4	104846	111720
180	1043.27	34.501	0	0	37600.8	35273.1	60550.6	64050.7
181	127.111	47.6782	163820	107961	72894.3	64215.2	97526.5	85447.8
182	367.138	42.0065	446501	311582	321678	242812	434640	701551
183	288.179	32.1979	17698.6	11988.7	77817.2	86643.4	297187	176745
184	800.238	36.4655	1776.42	4284.39	3480.23	4083.46	17242.8	17478.6
185	912.317	34.4876	369.917	587.957	102356	86329.1	262518	205734
186	436.155	41.4729	42076.6	37619.8	20510.7	16978.3	33427.4	33643.6
187	386.154	36.1012	82819.3	54423.6	2247.56	3650.27	87303.3	4005.74
188	1200.48	39.2536	13039.2	7266.13	0	0	5147.46	459.803
189	651.224	19.7491	37561.5	64964.2	0	0	92607.5	80456.1
190	1181.26	34.5025	0	820.909	22810	23340.6	30742.5	38165.3
191	247.17	47.6803	532242	355134	226889	200138	328025	257241
192	187.148	47.6848	369258	257270	163235	142676	230963	183421
193	663.428	34.1695	59914.1	51662	31326.6	27951.8	50160.1	38754.2
194	958.428	47.6748	165955	112669	89948.8	74738.1	119141	116264
195	1125.5	39.3908	17754.1	10404.2	0	0	5651.53	2162.43
196	716.327	31.2039	32576.8	22905.7	1157.16	212.735	6567.05	13993.7
197	1011.23	36.4976	0	0	6699.28	17243.5	22136.2	22577.3
198	1223.53	38.2932	5178.01	12264.9	0	0	24123.9	22066.8
199	137.046	3.20643	115100	199055	377632	326156	704637	442911
200	597.195	46.3059	0	4322.95	2607.71	1430.39	38795	35177.8
201	700.367	36.2408	351153	367782	450057	321736	548841	991131
202	1381.45	34.501	0	0	24149	19034.8	35997.8	50703.3
203	358.154	49.9829	76302.1	45091.8	37703.7	84658.7	453611	141191
204	427.16	34.4836	103388	28497.7	1.03449e+06	853525	1.59913e+06	1.29381e+06
205	143.085	47.6876	403314	273078	182891	143383	248383	183059
206	668.209	46.4012	67255.3	43830.3	25697.3	24470.5	48761.2	51725
207	662.192	19.7526	0	0	0	0	0	2480.36
208	237.185	40.7037	198507	225503	240840	192438	315192	185533
209	203.576	28.556	0	0	339.855	480.988	610.778	1645.59
210	825.356	39.2402	39283.5	25958.7	458.886	448.422	18194.4	14446.8
211	1124.5	39.3876	28275.9	16005.9	427.383	0	6669.41	3599.33
212	217.07	2.88419	95208.8	82349.2	89655.8	100276	81281.5	93280.9
213	1196.38	34.5012	365.862	0	5941.25	3653.86	20151.5	17137.9
214	240.077	34.4876	10077	8036.35	28709.7	26664	40712.1	34487.2
215	339.182	22.4793	24904.5	17921.9	53891.9	57451.2	142886	74114.2
216	1199.03	47.6908	75614.1	49230.4	37594.8	31778.8	50381.3	56471
217	529.175	54.6061	7832.65	15141.2	11294.8	30205	17668.6	25180.8
218	737.271	39.2436	35340.7	30996.8	1016.63	204.458	25386.9	19337.2
219	444.168	34.4891	913081	1.3196e+06	1.64194e+07	1.33873e+07	2.45754e+07	1.97288e+07
220	863.349	35.4692	1400.36	1941.83	37937.8	34238.2	8935.79	47482.3
221	933.208	36.4932	0	0	8658.33	14798	27480.7	21703.9
222	591.18	45.8391	172707	132530	56029.3	49177.2	153613	55361.8
223	460.243	47.6883	2.31758e+07	1.55205e+07	1.01887e+07	8.50854e+06	1.39097e+07	1.04333e+07
224	701.37	36.2364	91319.3	99517	112795	87202.1	140779	250595
225	946.267	28.295	218839	159719	115333	74635.8	147161	99134.6
226	200.09	34.4876	20935.9	15808.2	60381.9	53745.6	87179.7	70922.7
227	234.135	16.8146	139119	63341.3	28761.8	32690.6	21043.3	18641.3
228	1078.43	48.0941	45248.3	26448.6	34847.9	16703.3	49692.2	12937.1
229	478.13	33.1065	38033.8	51666.5	7696.89	3112.42	68362	62176.9
230	967.267	34.5001	0	2608.15	95182.7	71128.3	129632	116083
231	1051.32	37.2713	0	567.678	0	10473.6	25821.2	15463.5
232	1015.5	48.6102	49290	50888	11378.1	7436.79	24483.8	9766.03
233	491.299	53.6526	166821	144661	177376	178427	96108	66833.4
234	968.27	34.5003	0	850.3	59293.9	45077.4	82936.4	71140.4
235	266.184	47.6803	276518	188295	123280	107700	169056	133781
236	287.176	32.1668	30001.9	28279	370723	407359	1.49792e+06	894432
237	426.157	34.489	273863	356307	3.75139e+06	3.07432e+06	5.89755e+06	4.6954e+06
238	877.256	36.4793	0	0	10002.1	24695.9	47123.2	38997.8
239	369.095	19.7568	0	0	812.624	1590.44	3569.02	7669.44
240	699.364	36.2436	700411	753349	935185	693226	1.16145e+06	2.13237e+06
241	446.173	34.4865	98644.3	104888	829694	568258	1.09168e+06	843189
242	116.071	2.55437	80084.4	103952	40938.9	44303.5	36737.8	109198
243	876.254	36.4767	0	0	58416.5	88079.9	152925	146467
244	875.251	36.4793	0	641.411	109463	166181	293595	269963
245	445.17	34.4878	262711	377461	4.27831e+06	3.52908e+06	6.72592e+06	5.24852e+06
246	925.291	34.4865	5472.64	5544.81	19067	22176.8	37929.5	32849.9
247	532.262	42.4415	299673	212791	274548	366284	465412	471246
248	566.26	19.7476	0	16019.2	0	0	0	0
249	945.279	37.2801	0	0	338.268	11258.9	40373.5	20723.9
250	265.18	47.6826	1.59705e+06	1.03871e+06	683530	572009	966166	711818
251	350.14	35.6749	364301	284438	141469	117301	302163	459815
252	367.138	40.5739	81358.4	49744.4	84182.2	62089	81044.5	103787
253	581.323	57.04	52439.1	28684.9	44677.2	62120	10777.8	41968.5
254	434.141	38.8824	33034.6	36736.3	15442.3	8729.2	34927.5	47442.9
255	216.147	47.6803	658477	433527	281165	236134	387948	294642
256	1340.48	33.1066	19441.3	27147.1	0	0	20705.9	5845.71
257	498.175	36.2192	101534	702.814	2517.84	4284.94	20779.6	9932.34
258	1229.38	36.4767	0	0	18178.5	30774.8	67002.3	49581.8
259	441.955	64.0865	35424.4	32892	38602.4	39881.1	48018.4	47639.4
260	933.359	29.9409	43225.1	32657.2	2182.5	698.274	11717.6	4624.13
261	476.194	38.0366	111726	54063	280762	197833	268242	153128
262	799.236	36.4815	0	0	22289.4	28247.7	54181.7	41826.6
263	1039.27	34.5008	0	0	25331.9	20483.2	32645.4	32692.7
264	513.337	51.7867	381241	105518	110565	107182	85768.4	113910
265	905.356	42.3186	1760.05	973.178	1689.28	7038.88	58362.8	16850.6
266	1227.38	36.4767	0	0	61301.6	95976	217065	147240
267	207.175	45.6957	42232	29879.5	25051.2	40179	160140	23221.8
268	153.954	1.97126	9073.19	9324.11	7758.04	6676.88	8048.77	8305.65
269	350.14	33.6961	222636	161537	75340.6	59111	184627	207619
270	739.302	36.4598	465823	310984	1.75117e+06	2.518e+06	5.91878e+06	5.39706e+06
271	1228.38	36.4767	0	0	43563.2	72330.2	159887	112691
272	476.159	34.4878	10477.2	10771.2	55557.2	42060.5	68106.1	51554.6
273	324.098	19.7476	33361.2	26836.6	3468.7	10384.6	9492.13	2171.75
274	400.167	41.999	110523	76914.3	79059.3	58080.5	105887	168436
275	743.287	36.4767	2733.68	2288.99	241.619	2961.08	24898.7	23018.5
276	740.291	36.4598	226895	157355	871060	1.2209e+06	2.82495e+06	2.56262e+06
277	480.145	36.6661	35597.5	29408.7	842.735	207.344	26542.3	17580.7
278	728.313	19.7513	0	0	0	0	0	0
279	1585.52	36.4772	0	0	1624.65	11803.7	37453	20458.7
280	1044.3	37.2867	0	0	18389.6	36459.2	53079.8	30447.7
281	1586.52	36.4772	0	0	0	12187.9	37355.7	21283.4
282	1158.52	39.2363	17174.8	9153.82	226.292	0	8659.03	4868.7
283	649.266	48.5581	45601.2	35588.2	54814.2	55894.2	64384	71662.8
284	422.353	51.7936	40719.6	16480.6	58168.9	48017.8	50701.4	60604.3
285	554.937	64.0436	22295.5	20415.9	21289.8	25248	26779.2	26780.4
286	219.113	22.7961	570928	344728	162117	122397	244082	190400
287	1921.69	34.4866	0	0	17895.4	7499.3	101430	38604.9
288	525.1	47.0222	36978.3	28486.8	34814.8	30643.3	37677.4	30529.8
289	1923.68	34.4866	0	0	28984.9	16990.8	149061	57038.9
290	971.28	34.5035	1734.68	4398.69	9828.38	14117	40425.6	33866.6
291	286.311	43.0931	78236	54530.7	56623.8	15145.7	39893.2	54924.2
292	494.102	33.1081	979.964	16287.8	6228.78	2200.97	70836.8	52599.3
293	239.967	63.4724	101068	89925.2	90343	100698	97107.8	106861
294	233.154	47.6772	3.8769e+06	2.52862e+06	1.70488e+06	1.46801e+06	2.28306e+06	1.76529e+06
295	196.112	46.1473	35466.2	26989.4	17933.6	21997.9	153050	32539.6
296	428.216	47.6848	7.82655e+06	5.08466e+06	3.29536e+06	2.75545e+06	4.65037e+06	3.445e+06
297	942.462	47.6962	4.27975e+06	3.06291e+06	1.34528e+06	919318	3.01299e+06	1.6596e+06
298	149.059	47.6802	352274	245058	162958	151488	223220	163846
299	798.24	36.4815	675.239	3850.91	27199.3	29404.4	61599.7	45081.5
300	230.093	37.2844	48107.5	1856.99	81072.7	96354.2	107336	69348.9
301	1922.69	34.4876	0	0	46625.6	26493.3	237192	88527.6
302	882.315	37.3807	684263	636102	600901	552637	2.07225e+06	950573
303	869.238	36.4857	0	0	21489.5	30110.9	45124.2	37198.1
304	359.152	36.4781	367547	378681	2.01925e+07	2.0145e+07	2.76299e+07	2.40089e+07
305	361.157	36.4742	22158.2	12174.8	596970	617291	895028	734594
306	360.154	36.4761	116891	99311.2	4.74647e+06	4.72183e+06	6.96113e+06	5.81771e+06
307	362.16	36.4788	2868.12	1206.6	70224.1	69850.4	102345	85379.9
308	747.382	50.0044	45771.5	30734.1	10606.8	9763.86	74921.9	19682.6
309	870.243	36.4932	0	0	1324.09	7405.74	15980	14624.3
310	409.299	50.3657	268220	74624.4	95987.7	66962.6	35459.5	82030.5
311	477.196	38.0339	34993.4	1355.68	79471.3	55441.4	75361.2	44633.4
312	131.049	47.6893	662387	448074	288811	250084	412350	318703
313	378.173	25.4942	255401	245269	128346	90670.8	435593	211015
314	255.15	13.6164	26320.2	18495.6	123506	76882.8	505174	423427
315	915.345	37.2743	53099.6	81096.3	457242	831219	1.35218e+06	828188
316	883.317	37.4095	214149	223729	194160	175951	639074	311003
317	914.342	37.2717	154235	230807	1.4843e+06	2.7292e+06	4.50441e+06	2.70752e+06
318	913.339	37.2717	267947	431492	2.62127e+06	4.9361e+06	8.19067e+06	4.87274e+06
319	881.312	37.3848	1.32339e+06	1.21972e+06	1.13776e+06	1.03617e+06	3.8791e+06	1.78441e+06
320	1339.47	33.1113	55074.8	60302.8	218.215	242.999	42992.6	19114.7
321	215.143	47.6826	4.07106e+06	2.59122e+06	1.72127e+06	1.44812e+06	2.3439e+06	1.77188e+06
322	945.459	47.6896	457321	312390	144671	107010	329843	221254
323	1859.66	34.4852	0	0	0	210.815	22877.9	16773.7
324	234.157	47.6777	613113	398904	280921	246203	378532	285790
325	393.143	25.1953	68946.8	35254.2	82421.6	47719.7	12208	66898.7
326	916.347	37.2767	5762.24	20635.8	113585	195372	328196	201631
327	255.149	32.6036	39790.8	24356.2	15448.2	29028.5	80812.7	19918.5
328	446.9	34.4877	1680.49	4824.84	28445.9	22613.5	38588.6	31894.5
329	878.812	63.4325	47270.9	53029.1	15295.1	33322	33465.2	7082.38
330	734.333	36.3799	0	534.885	184805	155086	174579	414145
331	798.324	31.8612	16783.6	26162.2	35674.7	7510.48	52049.6	13149
332	409.202	47.6826	4.46423e+06	3.12041e+06	1.91335e+06	1.65613e+06	2.59016e+06	2.16587e+06
333	366.135	40.5761	324370	187118	344157	244343	312763	426429
334	129.069	47.6904	205849	136658	91669.8	80623.5	126057	92834.3
335	1338.47	33.1097	72439.4	81948.9	485.557	0	56588.3	23870.2
336	381.133	36.4828	28590.2	35692.7	1.93841e+06	2.26928e+06	2.78822e+06	2.63159e+06
337	197.132	47.6814	1.09899e+06	702933	457981	383016	622411	484682
338	378.144	42.9164	4715.62	35521.1	27898.4	36719.1	130213	68540.5
339	178.059	47.6785	238216	163146	105629	88080.2	138687	109062
340	290.011	14.6422	2126.58	3184.86	3231.18	8734	28485.3	34057.7
341	296.113	22.5582	80763.7	19183.6	172088	203919	598298	438513
342	348.171	36.8431	3.15257e+06	1.38188e+06	620538	644891	395010	943574
343	732.328	36.3929	12213.1	28960.5	1.48462e+06	1.23356e+06	1.28412e+06	3.31011e+06
344	281.178	48.9478	73377.3	33348.8	27745.5	35691.7	81692	54059.6
345	363.147	35.9949	13810.3	14612.8	22388.5	17496.5	23073.9	11019.3
346	691.503	50.5413	155475	37464.1	47531.4	47355.1	70731.4	79555.7
347	823.34	39.2414	31219.5	38886	442.448	0	26408.7	9211.05
348	398.11	36.4709	0	0	6537.43	19107.2	25581.7	22401.6
349	1077.43	48.0995	162642	97569.7	113060	63569.1	146487	40119.1
350	125.096	47.6893	1.02153e+06	657888	430811	381655	602078	468493
351	297.117	22.5582	9496.18	12899.2	32648.4	36310.6	102299	77079.9
352	709.305	49.9458	72949.3	42539.8	20666.6	31977.7	278642	104498
353	301.071	22.5567	94434.9	72388.8	85112.6	103659	291753	215785
354	459.075	36.5091	0	0	9803.43	33893.4	61657	50456.7
355	391.181	47.6727	163749	109397	66786	57224.3	101432	70633.1
356	941.459	47.6905	1.74261e+07	1.22307e+07	5.16565e+06	3.58145e+06	1.1531e+07	6.41959e+06
357	741.305	36.3834	100001	77175.6	222603	312871	743031	673331
358	1357.46	34.4852	0	0	0	0	15718.9	1683.86
359	374.362	50.8216	85633.5	64563.5	30967.1	43867.1	21779.6	46150.9
360	369.205	47.1963	207400	81694.9	98175.7	72057.6	71670.9	177183
361	751.314	32.795	3233.31	1915.73	7028.5	6429.68	10153.3	19559.5
362	630.354	36.1873	32074.2	34241	506.451	1421.9	58128.3	4156.09
363	976.314	37.2752	0	0	0	3596.14	22498.5	12244.2
364	733.331	36.3708	1605.11	9897.89	727251	594408	636966	1.6089e+06
365	109.065	47.6802	453713	290488	197607	166955	264087	203898
366	165.074	16.8259	74540	57303	157479	124321	100445	165137
367	443.103	36.4945	0	0	42495.6	63623.2	80014.1	84007.9
368	983.42	48.1315	71427.9	56751.3	63414.4	51303.2	96907.1	93785.7
369	671.329	49.9723	62449.4	26349.2	15282.7	13509.2	111234	33966.7
370	975.309	37.279	0	0	9629.18	24821.5	42065.2	27130.9
371	906.398	36.5432	0	0	33026.3	31602.8	39160.8	41901.6
372	190.972	1.98945	8909.66	10417	8731.97	9501.28	13575.6	15446.3
373	468.123	28.5292	0	5268	1376.01	3475.98	19146.1	36248.5
374	469.127	28.5718	532.982	664.15	1839.32	2009.77	5514.56	9720.33
375	971.299	37.2867	0	524.625	66894.6	83596.3	98900.9	61810.5
376	972.281	34.501	0	1267.18	799.049	1596.53	7141.06	20551.5
377	499.231	45.3636	308266	191731	135219	124076	217051	98099.3
378	461.946	47.6785	135609	89755.1	60064.6	49516.2	80823.1	60872.9
379	558.893	64.061	25166	26562.2	28424.6	31292.6	32887.5	34566.8
380	195.065	47.6887	1.41268e+06	892328	568652	489875	777153	567719
381	1075.43	48.1073	703260	410178	487150	257582	642678	172811
382	1047.32	34.501	0	728.193	75166.2	51036.4	93898.9	103914
383	91.0544	47.6876	566909	365750	239842	203575	324617	254838
384	208.178	45.698	5313.36	4617.29	5565.18	9150.75	22904.4	5728.58
385	199.148	37.7822	700371	457818	100852	185967	269460	140797
386	669.2	19.7512	0	0	0	0	0	0
387	141.091	47.6848	358012	229971	158860	132290	213738	160212
388	449.12	36.507	0	608.464	40041.3	63489	76526.5	82726.3
389	241.967	63.4769	22479	15136.8	17161.8	17486.2	17242.6	19686.4
390	553.938	64.0865	140326	144137	152273	180309	186596	194578
391	1076.43	48.103	420493	244234	293947	154584	380058	107286
392	946.463	47.6929	171875	128996	57336	39471.3	122069	84982.8
393	153.025	63.4101	211476	178878	185745	195231	196443	207528
394	605.248	19.6329	15498.4	8096.04	280.522	5296.44	23005.4	11653.9
395	1050.32	37.2837	0	666.681	38386.8	60252.7	64439.7	50186.7
396	320.205	28.8396	1.11716e+06	908169	790707	515218	684321	387196
397	279.088	22.5586	51338	45561.5	248669	281800	793668	586465
398	969.46	38.2903	68645.7	55996.5	0	0	10393.9	7213.7
399	1097.56	47.7829	58973.5	40858.9	63171.2	49592.8	62265.9	66958.8
400	1143.6	49.0854	42077.1	32571.1	960.531	1854.1	5917.87	6477.54
401	1371.4	28.2895	93926.4	76848.5	17885	0	78443.5	26867.7
402	177.055	47.6826	2.21976e+06	1.40552e+06	907328	792227	1.25572e+06	946907
403	447.186	29.9373	15710	10723.7	238238	275504	319507	203503
404	432.139	33.1291	27214.4	12260.3	3106.56	918.789	25550.1	15011.6
405	444.108	36.5161	0	425.376	523.306	8401.73	7527.92	21226.1
406	311.97	64.0421	21015.5	16946.9	19294	18125.7	15854.3	20597
407	912.327	37.1354	1609.91	289.558	3085.47	6666.5	35437.9	14678.9
408	507.175	34.4943	4498.51	9382.87	47590	42639.8	54229.5	50106.3
409	647.477	50.491	144546	38183.9	51080.9	52072.5	80825.8	94548.4
410	271.145	22.4636	35954.9	36843.2	147047	161673	539635	258655
411	446.183	29.9373	37021	20720	840046	961217	1.14678e+06	676306
412	555.936	64.0769	44800.8	42848	46649.7	54699.5	58023.5	56501.1
413	947.209	47.69	56247	35992.4	2311.01	0	33885.7	15991.2
414	83.0139	47.6751	164451	110639	70783.7	58471.2	101779	75732.7
415	233.081	22.4042	23070.4	28221.1	258776	287017	810303	493293
416	198.136	47.6768	188002	116415	76923.3	66170.6	104038	81053.9
417	485.327	51.3258	529887	163183	367915	287595	459703	339360
418	1005.39	42.1601	955.233	257.953	25929.4	21326.7	37968.5	49189.6
419	728.272	48.5506	35719.1	37399.7	59691.2	57758.8	68238.5	78513
420	1081.28	33.1066	2366.35	19378.7	197.934	243.534	23574.6	13392.8
421	618.327	41.6602	30201.4	34793	12694.8	19847.9	92728.7	50556.9
422	735.334	36.3581	0	0	34224.5	24787.3	36841.3	83522.2
423	807.263	36.4953	0	1159.16	0	260.512	10733.1	12738.8
424	590.257	19.7463	3.28677e+06	3.08633e+06	751376	394777	2.96957e+06	2.39425e+06
425	750.311	32.7959	2923.04	2363.99	13838.8	12601.6	15279.2	40934.6
426	241.096	22.7983	16894	49731.1	62982.5	55949.2	106814	95666.2
427	1064.57	46.593	43727.7	30740.6	32566.9	29458.8	34944.9	40476.8
428	707.315	36.3346	54327.2	40862.7	23071.7	26601.8	151452	84059.8
429	387.963	64.058	17913.5	19458.1	18867.1	21123.5	22159	21287.6
430	1264.63	48.9811	0	0	0	0	4447.99	0
431	560.361	37.9178	68159.2	47248.6	46604.8	35258.4	52211.7	24191.2
432	895.367	37.2841	0	0	37324.4	43122.3	49770.2	25546.1
433	345.135	33.1306	1329.07	4450.69	119866	91740.8	373585	206306
434	717.317	39.4966	137129	71185.6	217.519	422.476	27893	14264.8
435	972.303	37.2837	0	759.023	45268	50179.3	56388.5	35239.7
436	562.303	44.0205	293986	175725	185374	156734	215048	267432
437	1017.28	37.4414	1466.34	7662.36	23535.3	21805.1	49458.8	38475.9
438	508.255	41.078	415825	282330	25381.1	71287.8	178283	75006.2
439	589.254	19.7475	9.27572e+06	8.74075e+06	2.00142e+06	1.03167e+06	8.37986e+06	6.76453e+06
440	219.566	36.4975	0	0	10805.7	27978.8	37631.7	35015.3
441	412.863	63.5754	88794.3	80444.5	84472	89821.1	80695.4	86399.1
442	1096.56	47.7857	73751.7	55358.6	85028.4	67361.2	85184.3	88131.4
443	591.26	19.7466	665017	622438	162590	87304.9	586232	480745
444	159.116	31.1669	278453	180655	98343.3	71347.8	198358	54510.6
445	349.175	36.839	741747	339722	201893	164820	108734	221701
446	563.307	44.0272	116497	69031.3	68471.3	64408.1	85052.9	100569
447	748.331	39.4164	110559	59950	0	610.561	25386.6	14574.4
448	747.328	39.41	210445	117553	209.437	0	44743.3	24598.6
449	408.958	64.0865	110346	100825	96684.6	85838.2	77701	84253.5
450	750.346	38.9599	148818	114109	1039.97	678.154	32911.1	30988.2
451	280.091	22.5605	5412.34	6811.78	42403.5	50139.5	124901	96694.7
452	475.23	50.0902	122559	96176.6	154701	116954	53242.6	55981.9
453	909.434	39.1616	10135.4	14201.3	2250.48	873.33	20013.4	17052.3
454	360.237	54.1674	32042.3	33583	47534.6	40180.4	42421.6	37671.7
455	319.202	28.8532	5.70336e+06	4.54083e+06	3.97378e+06	2.49172e+06	3.34358e+06	1.83968e+06
456	468.138	42.945	1279.25	1455.46	37043.6	27657.1	36306.6	28508
457	371.4	55.9309	66289.1	86266.2	84643.8	80268	89022.7	99870.5
458	421.347	51.7936	30344.8	15758.2	148518	117025	130947	159907
459	466.149	34.5008	37942.5	125964	1.3261e+06	1.24353e+06	1.4982e+06	1.68687e+06
460	718.321	39.4998	70263.9	38335.4	942.221	948.624	16404.1	8726.5
461	842.342	37.7167	88351.6	48154.7	493.022	240.197	43440.8	16346.1
462	424.929	64.0865	84872.7	80445.1	94070	104123	112879	115171
463	471.287	51.3009	9.81607e+06	5.32869e+06	7.56908e+06	6.48713e+06	8.81239e+06	7.31845e+06
464	749.344	38.9481	294017	213289	486.511	458.046	75771.5	60177.7
465	1222.53	38.2874	31521.4	39406.6	0	0	37504.3	35229.8
466	744.356	38.2527	15726.2	13069.3	63041.8	39275.1	61394.9	100496
467	939.271	37.4528	0	1838.04	20974.8	17041.9	40576.8	23703.7
468	282.907	63.5623	139698	114490	127348	118143	116694	123845
469	472.29	51.3026	2.7881e+06	1.55172e+06	2.15687e+06	1.88461e+06	2.50219e+06	2.10903e+06
470	267.196	45.6772	46613	387319	439432	614177	2.0096e+06	444514
471	590.334	47.6803	285261	202256	153646	133897	130062	174812
472	196.069	47.6899	162736	101488	65291.8	59017.6	88988.7	69014
473	1033.51	46.5303	3749.87	10035.6	1056.6	701.167	13979.8	10277.7
474	511.225	29.349	67585.2	45570.9	6052.62	8235.08	12018.1	18608
475	512.192	36.0967	9069.53	5993.18	80501	73202	97491.7	80139.4
476	445.151	42.9485	29206.8	22885.6	385880	251365	342089	217241
477	861.353	36.2556	10161.7	17791.2	48134.1	25780.4	37475	64806.6
478	737.38	50.0017	71044.4	65046.1	7079.74	6030.39	30109.6	73361.2
479	771.375	36.4978	22656.4	25309.5	890.51	929.105	679.577	10290.8
480	777.576	53.7011	102956	52111.6	67697.9	66934.1	79670.5	93075.7
481	473.293	51.3039	510339	292951	396278	343151	452291	376919
482	375.146	32.0857	4582.46	5371.14	128977	118337	304988	176396
483	542.821	63.5837	48920.2	51512.2	54854.6	58134.7	58361.3	64139.6
484	325.202	41.4479	616151	468544	241416	193882	624706	174735
485	326.269	45.6772	25156	19501	36967.2	64006.5	114070	49480.4
486	398.161	40.5739	344008	270395	468880	344167	436552	582613
487	950.944	47.6907	166899	110117	128496	113350	108031	122503
488	485.163	32.8271	33623.8	24730.7	70497.7	73571.8	97873.4	70469.2
489	186.053	16.8267	30112.9	18831.5	79203	67973	58336.3	146087
490	324.136	28.6115	80376.9	319730	23004.9	29731.8	104493	66594.6
491	565.256	19.7501	53255.5	64125.7	0	0	32173	19508.7
492	894.366	37.2817	0	252.815	146330	167042	164904	84711.3
493	876.802	63.4325	152547	180377	33660.5	15257.5	16664	63715
494	880.3	34.4356	6700.16	15867.4	42364.4	23722.8	206067	61752
495	1001.23	28.3026	98911	43257.1	66806.5	47437	24471.3	47536.5
496	513.211	41.0791	372637	262924	27979.2	77125.4	188001	81536
497	393.239	41.4473	731614	437924	261709	204304	383548	112064
498	743.353	38.2462	53363.2	40247.2	128665	74294.7	122008	201946
499	423.217	48.1481	258198	115383	156074	101444	150414	78009.5
500	961.269	60.1983	393786	362277	241684	246104	290268	127433
501	1370.4	28.2994	171245	136922	39735.8	17173.3	129231	48496.9
502	838.319	42.9364	909.148	309.907	4343.07	5799.39	9674.41	5767.9
503	557.122	42.0041	78125.5	73415.7	18494.5	16089.4	23124.8	36882.7
504	480.85	63.5606	34675.6	30968.2	29845.4	26127.9	26276.6	26000.7
505	391.177	20.2549	12223.9	9002.91	4910.05	3703.17	51037.1	6248.02
506	205.987	63.3011	25102.6	24949.3	26550.1	29514	25822.9	25190.1
507	260.09	24.2157	108960	86960.8	15030.4	20737.7	49701.5	27157.9
508	1143.36	34.3244	0	0	5963.41	4321.48	4576.33	4266.49
509	1007.38	34.3578	0	0	84260.2	47558.2	63750.3	44411.5
510	1094.91	36.4815	0	0	1830.12	6390.97	27760	13272.9
511	827.311	36.5034	0	688.117	7489.67	10350.8	121831	37074.8
512	714.337	32.2325	31684.7	22627.1	878.666	0	32720	20986.3
513	569.147	34.501	958.76	3466.26	31496.5	34466.7	56175.2	67069.2
514	938.509	48.0273	130672	28205.9	18328.8	6456.57	65706.4	10357.4
515	770.372	36.4924	97475.9	93480.8	688.995	213.067	3784.15	32158.2
516	949.485	48.6638	123350	271722	7624.51	5211.66	109153	56292.4
517	468.165	37.2597	1.59171e+06	1.64763e+06	4.22415e+06	5.04568e+06	5.45095e+06	4.53664e+06
518	950.489	48.6638	82826.1	173275	1883.66	3130.73	69316.6	33644.9
519	893.364	37.2829	0	0	614897	702884	694121	344056
520	1008.38	34.3564	0	0	47763.9	26546.6	36125.1	24318.3
521	727.268	48.5524	81563	85478.7	142698	137923	172925	190182
522	119.047	16.8151	6663.33	2043.62	25056.8	14016.7	10678.1	24764.6
523	796.979	64.0636	22026	21341.4	21686.2	19027.8	16417.3	17922
524	1063.57	46.5724	59763.1	40992.3	45447.1	41838.3	44142.6	55224.6
525	469.168	37.2597	414062	438097	1.1638e+06	1.35347e+06	1.47436e+06	1.23153e+06
526	892.361	37.2837	0	0	1.98919e+06	2.35723e+06	2.22194e+06	1.10422e+06
527	799.326	31.8679	365.416	6584.59	18317.1	4736.83	27168.3	5970.48
528	548.134	36.6721	20102.4	22240.2	4524.78	5110.8	17037.9	13933.2
529	891.358	37.2841	0	0	3.58867e+06	4.21515e+06	3.98434e+06	1.92775e+06
530	467.153	34.5025	23908.8	39009.9	365096	353998	422998	471534
531	322.097	19.747	457491	384092	219932	163353	344952	326837
532	373.256	47.6826	55140.6	33486.9	75663.5	80337.6	101810	34152.7
533	1925.17	34.4863	0	0	30049.3	18558.1	0	79598.2
534	1157.52	39.2341	108579	66919.6	398.627	0	29275.1	14792.7
535	977.33	34.3811	0	0	18164.2	16766.3	64906	45752.2
536	517.108	36.4794	0	1346.83	205318	242296	248239	241915
537	428.173	37.2927	198372	132695	6.34599e+06	7.06419e+06	7.15352e+06	4.88487e+06
538	546.107	37.2677	0	2212.99	23177	48160.8	56104.6	57155.8
539	879.297	34.4403	13080.6	24230.4	81842.5	43593.5	397220	107758
540	308.128	19.744	179242	110070	75890.5	48795.4	140777	125822
541	1297.58	48.5504	4910.14	6848.93	9461.5	8884.15	71393.4	34138.4
542	323.936	63.5928	201072	161942	154554	145449	135511	143088
543	742.299	36.452	29265.8	5086.14	43457.6	59784.6	165880	157186
544	327.141	47.8808	46686.2	21391	57502.5	80106.2	18078.9	91342.7
545	884.254	59.1419	1.87961e+06	1.5185e+06	988559	1.0762e+06	963811	439405
546	117.054	4.02734	53185	34068.5	35793.3	24684.7	35732.3	59066.5
547	826.307	36.5278	0	965.314	34835.9	36300.1	230957	68121.2
548	1080.45	41.0253	17348.7	7718.57	0	453.428	10624.6	8211.64
549	602.447	50.3928	546496	139231	184913	185860	261300	305748
550	330.145	21.3642	62654.2	54219.8	19149.8	9927.51	19946.9	15879.3
551	429.176	37.2902	52314.6	35915.4	1.7008e+06	1.8893e+06	1.89803e+06	1.34612e+06
552	337.106	44.2662	40295.1	130344	451700	415244	30659.1	71638.6
553	969.495	47.6642	157752	78214.8	123168	91316.5	126072	79827.9
554	315.171	32.6029	20538.5	18901.7	16067.9	54224.2	175667	29284.6
555	883.253	59.1392	2.21899e+06	1.77599e+06	1.16559e+06	1.27195e+06	1.13103e+06	525430
556	589.357	49.004	127022	110253	181277	180120	344054	370522
557	951.491	48.6575	32108.6	66944.4	2440.72	1670	27533.2	15277.3
558	603.45	50.4226	188621	47652.2	58687.7	58771.6	89946.7	103184
559	426.927	64.0476	24682.5	22089.2	28215.4	29596.3	28765.5	31980.5
560	136.075	16.8267	58523.8	34907.7	315400	224792	176327	364039
561	987.337	34.3968	0	0	14619.5	5277	19206.6	19981
562	526.318	48.5541	72860.6	68703.2	102742	89274.3	253633	159592
563	574.291	47.9326	1872.49	1557.97	7049.44	8263.15	1179.85	16490.8
564	752.379	50.0784	16640.7	20656	23805.2	14702.5	24581	17052.9
565	592.262	19.7475	102288	94029.5	12540.1	5312.91	100930	79367.8
566	596.192	46.3054	94340.6	81560.3	4089.59	1491.84	111313	98713.9
567	470.17	37.2721	85003.5	80386	202504	229171	248363	209393
568	884.319	37.4264	63390.6	87240.5	45222.7	42800.4	172240	15984.5
569	729.284	49.0059	4918.26	7754.97	37354	39618.3	25089	48212.6
570	778.179	34.4064	0	0	4978.85	3176.62	50393.5	14459.5
571	374.036	19.7548	0	10844.6	29184.5	27780.5	53066.8	45325.2
572	448.189	37.2902	37687.7	21197.5	968879	1.07221e+06	1.07654e+06	741039
573	289.178	48.4883	432449	12760.9	88732	95663.1	21466.8	52253.8
574	968.457	38.2841	217044	190158	4845.83	0	66280.2	50804
575	447.186	37.2903	189519	123806	6.18486e+06	6.91429e+06	6.69692e+06	4.61428e+06
576	603.212	46.3029	14285.6	24948.9	2191.33	1794.83	66823.7	57136.4
577	1156.52	39.2287	364958	204614	214.82	0	82096.4	45304
578	164.07	16.8267	59727.1	56549.5	1.15625e+06	836796	692510	1.35375e+06
579	959.271	60.1992	1.26235e+06	1.15544e+06	776341	784186	919557	391325
580	960.271	60.1988	728039	679384	460691	459039	537110	226512
581	337.236	49.2082	727236	531969	145095	47409.8	368116	155913
582	84.0099	63.3957	44668.5	31433.1	30070	27434.6	28915	25323.6
583	706.312	36.3527	25910.5	11132.4	65178	74440.8	255977	171514
584	120.081	22.7994	9614.56	8604.43	85474.3	61816.9	119134	96285
585	298.288	54.5631	118950	41897.2	60768.1	49765.6	40519.7	64474.7
586	451.247	52.9505	105547	107931	68852	54266.4	111332	197232
587	306.122	19.7516	8.20344e+06	7.41659e+06	2.94344e+06	1.93732e+06	6.8805e+06	6.11268e+06
588	586.339	48.5576	1.60116e+06	1.57523e+06	2.76158e+06	2.42922e+06	7.81152e+06	4.84807e+06
589	1026.39	34.0746	294.353	0	248.795	0	0	0
590	871.39	44.5211	35335.5	74338.9	1444.14	242.029	20579	21336.5
591	478.391	55.8384	134913	180057	197538	169545	169461	175434
592	540.17	35.5463	271328	255212	306303	225233	241015	283194
593	227.955	62.5274	47318.7	27951.6	26914	25197.1	28434.9	28194.5
594	310.238	39.3612	127079	98240.8	53073.3	44534.9	95865.7	47917
595	1154.51	39.2341	1.12662e+06	616288	248.138	0	229495	123440
596	769.369	36.4735	216643	203632	2596.57	272.971	45868.4	97014.4
597	242.173	16.376	12908.2	9060.63	80913	47816.9	990245	253345
598	184.043	12.4	9631.64	11592.3	38727.3	60839.4	21825.7	65031.6
599	1155.52	39.2352	888154	494632	461.534	0	180859	99776.7
600	1025.39	34.0917	0	0	1235.74	686.675	0	804.114
601	248.024	19.2354	3875.26	5153.61	4319.98	5169.21	10604.1	4082.52
602	1018.29	37.4485	0	0	10309.1	11544.3	21699.4	16367.9
603	1028.44	47.6193	22339.1	6358.91	63734.6	48412	66733.9	150485
604	962.269	60.196	174372	162491	107753	102684	127687	45806.9
605	957.271	60.1988	1.52712e+06	1.37801e+06	928818	946543	1.09028e+06	466818
606	715.841	47.6824	73740.7	35558.3	56059.8	58128.4	66405.5	69669.1
607	908.259	60.1992	143337	117654	73735.3	70990.9	91042.6	15273.7
608	501.136	32.8179	3967.12	3404.24	5448.22	7222.2	5935.01	8356.4
609	958.272	60.1992	1.40701e+06	1.28276e+06	865476	883164	1.0215e+06	434830
610	265.18	44.8864	1.49038e+06	81645.5	197732	236294	730957	83972.7
611	263.997	19.2334	16562.4	10431.7	14698.7	11430.2	24644.9	8083.37
612	391.931	64.0677	32703.9	27763.8	28767.9	29108.4	25048.1	29026
613	87.0453	2.84597	59523.8	40945.7	24035.6	13198.7	31114.4	25397
614	320.307	40.5822	175631	69626.9	115780	64697	119896	125099
615	1123.57	36.2696	0	0	0	0	0	0
616	1077.44	41.0252	217868	104868	0	228.334	130250	102148
617	715.339	32.2281	18537.3	11910.7	289.719	0	16751.8	13231.7
618	275.08	2.46832	64277.8	44010.6	19874.5	21560	18868	18564.6
619	216.034	20.7464	2320.8	5440.7	3529.18	2551.37	10986.5	11683.6
620	1079.45	41.024	54900	27341.8	0	296.843	33200.2	26805.2
621	408.143	35.6771	130961	120057	76860.5	71660.1	153963	240058
622	712.209	19.7585	0	10425	0	0	5037.22	0
623	588.345	48.5613	145684	133250	228472	207355	598071	393217
624	1122.57	36.2727	0	0	0	0	0	0
625	1078.45	41.0252	141201	70163.6	0	473.314	87095.9	65668.8
626	843.36	35.5322	222527	190640	119774	38803.8	93862.3	131827
627	307.189	41.3406	107550	86201.7	73864.1	75332.6	122472	38344.5
628	693.39	45.8375	59056.3	49636.4	20980.1	17027.6	52980.7	19186.1
629	986.401	34.3405	0	0	30405	12251.2	21347.4	9462.39
630	587.342	48.5576	592871	575673	1.00655e+06	896938	2.70771e+06	1.73292e+06
631	262.108	24.9001	344157	298286	66513.7	34127.6	56501.5	46237.2
632	307.125	19.7475	1.44819e+06	1.31872e+06	532561	353792	1.21892e+06	1.08251e+06
633	864.626	53.6698	51705.9	24705.5	31966.3	23371.2	44588.3	48716.3
634	816.4	35.555	0	0	0	0	0	2533.46
635	854.394	48.8918	182216	89991.4	14759.7	14293.3	319620	81951.4
636	446.184	37.2967	664104	434353	2.29793e+07	2.54358e+07	2.50982e+07	1.75312e+07
637	1295.57	48.5547	8086.75	16532.5	28415.1	22199.3	212419	94651.4
638	238.108	24.2298	397772	262289	78517.8	48491.3	94870.9	52015.5
639	320.976	64.0635	22541.5	19086.1	19587.6	20817.2	19044.1	19382.2
640	949.942	47.6897	47185.5	27041.1	0	0	30646.4	18378.4
641	426.157	38.4125	213037	99302.1	771108	863731	458751	354441
642	368.093	19.7515	54683.7	74536.3	38163.8	32109	131602	132051
643	872.394	44.5233	21553.5	44617.7	1573.08	219.799	13687.9	12669.9
644	1217.56	48.556	7985.74	11104.5	13894.9	10000.3	69232.7	32697.9
645	835.24	59.1375	175593	118813	80852.6	88378.5	62590.6	18722.4
646	333.3	54.0331	116623	75473.3	86001.5	87092.3	112185	167962
647	241.17	16.2847	81343.5	53373.8	397358	243524	5.68083e+06	1.38755e+06
648	425.367	53.8106	243141	168964	189136	198055	241659	261832
649	985.398	34.3572	0	0	49485.9	19152.8	35684.3	15086.4
650	239.111	26.1931	395622	292969	90916.2	42336.4	103648	59226.7
651	289.178	45.6737	178349	167665	632186	887974	1.08755e+06	834833
652	403.141	31.9089	39948.6	45720.7	689635	476777	454591	299681
653	693.31	49.967	21805.9	12276.1	10145.3	16320.7	205857	40142.7
654	853.391	48.8954	331714	164602	20426.4	22806.3	569317	146626
655	753.338	36.8646	102257	51195.4	673.424	443.597	21370.1	9885.69
656	395.22	49.2825	23339.2	17905.3	51799.6	41827.5	17641.5	70738.2
657	379.175	30.3433	159282	113322	106864	71954.5	57340.3	176913
658	280.118	23.835	618666	485555	124564	71345.5	118443	85899.4
659	795.976	64.0865	143175	128226	122447	117171	95691.7	104388
660	514.396	50.2475	567114	151335	224658	221738	244573	317544
661	1108.51	36.2727	0	0	0	0	0	0
662	452.052	19.7475	5216.11	33490.7	47276.8	40922.6	120940	107876
663	793.328	39.246	53052.6	36786.2	202.59	417.745	16778.3	9246.7
664	531.19	55.1552	0	12048.9	12335.8	20575.2	6898.76	25163
665	534.137	34.5107	0	5344.18	54369.6	69583	84058.7	109176
666	1004.39	42.1694	850.001	847.515	78917.3	60817.8	85737	91402.5
667	500.134	32.8275	1734.69	1716.33	13983.9	18795.4	10809.8	19223.1
668	652.367	36.2238	92732.4	80289.9	63578	51739.7	242742	134934
669	761.221	58.1616	394888	226546	143243	193788	75286.1	48960.2
670	528.121	34.4996	2340.57	5546.1	28989	35045.3	48797.2	62460.5
671	1128.52	36.2665	0	0	14056.3	0	0	25392.9
672	908.431	39.1596	33373.6	30751.2	2726.61	1645.13	33575.6	27782.1
673	844.362	35.5308	116851	95119.4	58186.4	12616.9	45060.3	62851.8
674	1216.52	46.5754	18703.9	19577.2	33570.9	30624.6	24838.9	36197.7
675	212.018	63.3908	28180.4	22572.6	22192.1	20053.1	20343.7	21458
676	558.422	50.3256	587191	143067	213666	214668	269676	330326
677	666.975	64.0865	63397.6	50919.6	53667.7	47985.1	39708.1	43834
678	1296.57	48.5535	5842.6	12540.5	20621.6	16246.4	164562	69861.7
679	947.274	28.2918	106406	91546.2	56087	47515.3	118939	82238.4
680	182.063	19.7661	80400.5	62892.6	11976.5	20045.2	19826	14492.1
681	834.241	59.1385	335742	230926	158944	174571	127511	49276.2
682	760.222	58.1604	819935	474645	297481	390262	158002	109341
683	109.065	26.1962	595592	445504	126747	58448.3	145582	86117.1
684	998.517	48.0426	231670	117431	51822.8	29792.9	317034	33087.5
685	290.181	45.665	33467.2	28551.4	122773	165689	195909	153071
686	491.4	50.1877	9514.51	8240.41	7538.85	5700.89	60850.9	14243
687	762.22	58.1588	188227	108552	71181.6	93610.9	32354.5	13372.7
688	575.291	47.9264	2485.53	2999.39	10521.3	11619.7	3397.51	21471.8
689	305.022	19.237	7306.07	8452.37	9226.83	9517.39	20530	9138.92
690	307.955	63.4742	43967	32862.5	27721.1	22630.1	23408	21691.5
691	498.365	51.7938	116364	114420	934217	651556	607875	669778
692	964.439	47.6883	44755.7	13632.1	39672.5	35110.3	48136	48060.5
693	811.956	64.0406	19670	18459.6	19216.5	22829.2	21016.1	20022.3
694	386.216	37.9848	143091	90417.9	49419.9	55067.7	23571.7	41382.7
695	467.152	38.4319	1094.43	59146.6	148327	191808	79023.1	65719.8
696	896.346	31.0784	21303	17537.6	0	252.268	8814.24	0
697	260.09	25.8655	702150	653210	155736	119258	362436	241600
698	1128.38	34.4865	0	0	0	0	0	0
699	717.556	54.3484	204367	123604	139449	143828	123341	132761
700	800.936	64.0476	23840.8	20416.3	21527.4	19287.5	15749.1	18712.7
701	694.319	49.9755	15704.5	9481	8577.31	9060.18	105595	20629.7
702	458.167	28.6048	14761.9	12055.7	8261.97	4540.45	10674.6	18729.9
703	976.387	42.3938	1720.44	3145.79	936.725	2206.25	69078.5	11298
704	833.242	59.139	399320	268246	187509	204510	154105	62271.3
705	233.147	62.6435	551331	411791	295485	250956	227089	281021
706	651.366	36.2258	189904	170417	118336	90115.7	524612	291922
707	406.293	47.2127	23703.3	12541.2	28270.2	23094.9	14958.8	37007.2
708	537.207	19.9355	1213.01	768.682	0	228.253	704.244	0
709	730.361	36.2702	0	0	0	0	675.877	17291.5
710	404.144	31.9082	1046.41	5726.81	179985	121830	119093	79847.9
711	940.459	47.6885	3.55705e+07	3.16966e+07	1.57841e+07	1.11657e+07	2.98751e+07	1.89546e+07
712	320.289	53.8916	48034.8	31462.7	35605.6	43549.3	50720.5	58382.5
713	377.233	49.0238	49496.3	20690	73243.5	66646.3	95473.1	98010.6
714	95.0493	18.7558	88425.5	71129.9	23614.6	10341.3	31536.6	14915.3
715	549.245	22.9275	119254	109330	51301.2	32010.8	76422.8	46486.9
716	319.304	40.5822	1.34469e+06	523218	885215	476135	902943	1.01729e+06
717	1003.39	42.18	932.805	2200.19	132181	99412.7	138664	153767
718	759.224	58.1618	1.00296e+06	575563	361540	484428	197125	127456
719	313.238	47.6986	228127	409169	104373	89240.3	234931	107363
720	541.127	56.0806	4802.68	10680.2	9307.2	15266.3	0	0
721	646.475	50.4687	477473	110350	146686	153077	211279	255671
722	518.111	36.4907	0	416.948	55450.1	66816.8	73725.6	69773
723	1014.5	48.5938	11794.5	74760.1	15996.2	9571.26	36148.8	13313.9
724	784.352	36.7652	243080	130056	56663.7	24632.7	52665.8	55554
725	633.336	51.7946	3374.35	7064.94	46094.6	28980.8	32769.9	32581.2
726	537.963	64.0865	54275.8	50458.9	50108.3	49342.6	38552.6	43763.3
727	683.314	33.0986	6140.51	4321.13	1737.24	0	25749.3	41846.3
728	699.304	48.5364	16016	16263.1	29939.5	23398.6	45625.3	25622.4
729	978.332	34.3816	0	598.293	11352.5	3820.34	22268.4	22644.7
730	832.241	59.139	482320	330120	234054	252401	186560	77417.6
731	318.301	40.545	7.03096e+06	2.6456e+06	4.66218e+06	2.43365e+06	4.73436e+06	5.34652e+06
732	690.501	50.5284	394420	93794.3	119557	119021	181752	204621
733	778.342	39.2255	1.74439e+06	1.00905e+06	2060.54	1434.74	396956	261693
734	441.228	47.9131	5.27333e+06	3.03309e+06	2.42519e+06	1.68362e+06	3.01866e+06	1.31383e+06
735	375.146	33.3724	3311.67	5383.89	102313	98626.1	85896.8	60811.9
736	812.233	58.162	605315	386962	213753	260653	137430	77311.8
737	101.008	63.3992	45921.7	37254.1	43234.4	46876.5	57147.2	68443.1
738	567.243	42.308	594677	401687	317402	205550	135785	87235.1
739	125.096	28.8563	939978	887102	445032	270392	891447	262593
740	777.339	39.2309	3.52974e+06	1.99285e+06	2426.09	1828.93	777612	490417
741	1037.54	48.556	22851.8	10899.3	20447.4	13847.2	29814.4	20705.5
742	808.295	40.6125	8576.91	4602.14	5979.27	4693.68	6182.05	0
743	298.097	9.64115	30336	47157.9	13953.1	9133.75	7877.73	11293.5
744	758.223	58.1618	1.34061e+06	768650	511598	651955	274716	176067
745	505.175	54.9971	1346.48	11026.2	13921.4	19869	14492.6	25773.5
746	734.527	50.5784	296459	63935.9	84815.5	89523.4	126828	150550
747	1034.29	61.4544	463866	483437	335020	321067	399076	165370
748	600.47	53.7257	1.13973e+06	656416	772180	806554	818723	984666
749	1369.41	28.2911	186787	146373	34724	4140.84	106783	36631.9
750	778.555	50.585	196668	40769.1	58774.4	59287.3	84537.8	92993.4
751	401.143	32.8591	80422.2	53526.9	51044.3	26602.8	98916.5	55315.1
752	649.432	43.4957	84563.8	64003	58061.9	60824	75831.3	69762.3
753	219.022	63.3909	1.02338e+06	690506	668720	648349	580382	583756
754	514.339	51.7926	3536	6076.6	40373.9	38946.4	30097.9	39753.4
755	221.018	63.3941	163612	111559	101239	101096	90455.6	90121.5
756	180.159	22.4759	104347	84636.5	109492	83514.7	91200.4	106019
757	462.178	34.0346	11868.9	8577.25	133624	96198.1	90375.9	58861.2
758	291.194	48.9561	27273.7	6590.11	101775	134653	5507.28	102169
759	1032.29	61.455	785189	814064	570248	533878	681786	296624
760	484.155	32.9544	77094.5	62259.2	238646	250276	300863	228372
761	519.114	25.9353	8973.08	654.7	0	637.408	23970.2	6309.85
762	1049.31	37.2902	73908.6	2938.16	64646.1	100374	107471	86030.7
763	779.345	39.2297	516521	322027	1798.48	711.073	131873	86368.5
764	444.167	38.4179	55071.7	26259.3	2.44513e+06	2.63883e+06	1.44839e+06	1.05158e+06
765	980.479	48.9753	45550	20019.6	5308.28	1983.65	8554.19	7188.95
766	1130.52	36.2757	0	0	0	0	0	4913.17
767	517.114	25.9395	9772.96	3511.83	428.823	639.743	31425.6	9501.17
768	905.486	50.0902	12303.3	17188.6	15512.6	8444.63	7077.53	5635.06
769	702.335	31.1147	77837.9	69555.3	2911.21	931.54	36623.9	0
770	1035.29	61.4544	265711	275784	197482	180298	223465	98661
771	445.17	38.4079	2967.93	1710.25	679888	739881	412789	301776
772	444.229	48.9377	102448	57710.9	13578.8	8704.77	93941.6	72232.2
773	462.178	31.0883	20900.3	9901.39	116791	118358	206901	104066
774	165.091	28.8554	400044	391534	200665	118496	401424	117235
775	557.446	53.731	406444	246512	284348	296670	301263	354272
776	400.14	32.8603	349415	207038	192967	103995	403926	233025
777	611.918	54.2298	23100.5	15545.6	17127.5	19793.8	18493.7	23185.3
778	373.101	53.8224	47942.4	6024.63	5544.09	6438.3	33916.6	33964.6
779	1041.5	48.012	423974	655732	0	0	375206	73824.8
780	590.122	29.6259	157687	171939	58204.3	34277.5	95829.6	43050.9
781	813.231	58.1592	291820	184598	102255	122992	64280	28285.2
782	356.127	50.5091	14670.8	23545.7	46238	42134.4	3068.9	11165.5
783	1033.29	61.4546	736442	783542	545566	505083	631292	278398
784	820.6	53.6824	103385	57800.7	72255.1	66108.7	95960.8	107670
785	235	63.5771	604133	456915	415807	398610	336358	380296
786	462.265	47.8489	455801	302180	574024	446881	345652	280874
787	512.418	53.702	1.46144e+06	895653	1.09261e+06	1.00148e+06	1.58747e+06	1.89285e+06
788	169.049	19.2334	74416.5	49505.2	61095.3	49079	94948.5	45353.9
789	236.129	42.5024	1.84333e+06	1.08381e+06	160977	84660.7	270843	114855
790	645.499	53.7195	348083	207740	255027	267549	269383	321203
791	424.14	41.7268	54588.1	40771.4	17342.2	14563.6	15161	10367.2
792	218.087	63.3941	392898	321531	381647	432628	475487	523681
793	1368.41	28.295	240457	196256	44631.5	15384.2	134945	47466.7
794	424.365	53.8136	868790	562459	664622	733050	809064	985336
795	507.128	25.9438	20424.4	4431.15	0	530.699	20588.2	6815.82
796	1027.45	42.7635	48652.4	55542.8	209.141	201.894	42746.1	9223.75
797	811.233	58.1618	1.21627e+06	749102	430723	524067	280195	161118
798	512.107	29.3009	184179	133976	43961.2	25037.5	46204.6	24536.3
799	601.473	53.7257	404063	230273	275664	284413	286909	339978
800	189.164	48.9115	252789	163080	25787	17874.6	14077.9	22766
801	810.235	58.1604	1.4828e+06	925366	526600	640705	342277	191673
802	1031.29	61.4591	779079	814020	580289	537740	676547	294740
803	974.812	62.503	60931.2	53869.1	69287.6	73122.1	73391.8	53390.9
804	497.361	51.7955	181735	320231	2.89904e+06	2.03905e+06	1.83014e+06	2.04067e+06
805	1107.42	46.3052	49883.5	44433.4	647.179	210.267	41295.8	23301.9
806	768.421	47.9728	38097.2	101302	567.252	633.767	12156	56294.7
807	719.263	42.033	12074.9	11559	3530.43	5500.95	51889.6	22176.7
808	1129.52	36.2702	0	0	2449	0	0	17906.2
809	518.114	25.9346	17620.6	3694.91	258.39	221.243	38102.3	10149.7
810	336.311	53.8876	533788	365641	417086	466932	523882	629028
811	939.232	28.292	459628	255858	75539.1	69235.2	135583	110040
812	797.98	64.0802	46549.3	39580	42542.2	37225.6	31933.7	34528.5
813	270.139	34.1778	11841.1	28352.8	3241.13	4490.32	36848.2	9555.81
814	216.147	28.8543	138915	141598	69281.2	43848.7	144337	42583.9
815	530.136	37.2677	1276.71	2354.66	90993.8	102910	86420.4	92420.3
816	363.312	53.8916	448212	266192	319814	359265	414270	502819
817	270.207	27.2221	241344	193146	265789	149503	306634	124303
818	978.468	48.9377	48448.7	32728.1	1214.22	1202.06	24190.9	37036.8
819	633.305	36.5238	14181.6	12047	41077	47232.3	148891	53906.6
820	348.039	63.4553	6258.47	7056.98	8140.78	9650.8	10376	12672.4
821	220.025	1.95351	13830.4	24001	9825.72	10268.3	8662.82	11488.4
822	809.234	58.1618	1.93074e+06	1.18965e+06	674940	828334	436075	247434
823	926.328	19.7476	34873.4	56156.7	0	370.41	12601.6	5041.39
824	497.194	48.1295	144353	80147.9	102909	75549.1	119214	69165.6
825	411.235	49.257	1.40347e+06	450990	788589	471767	354956	218022
826	730.291	48.9914	54409	59950.3	18859.3	17421.9	6987.36	10549
827	314.146	38.5068	232572	88536.1	25343.1	14175	116088	61962.9
828	381.341	53.8887	358412	213423	256423	283089	342633	396939
829	337.153	32.6036	43287.8	31433.9	25837	39710.6	146733	33433.9
830	380.338	53.8916	1.64557e+06	937704	1.13874e+06	1.25883e+06	1.49443e+06	1.79774e+06
831	477.248	45.4002	597384	222545	160915	172289	296396	71794.4
832	484.138	37.2807	32328.8	28731.6	128809	174841	180047	166381
833	628.5	54.3761	952413	574262	650822	672062	577528	623421
834	319.285	53.8876	237056	162949	185307	207944	236911	294666
835	248.129	23.7307	107343	75264.6	29162.2	22721.9	14352	7723.26
836	794.285	36.3686	0	0	67865.9	47429.6	401140	131884
837	556.443	53.7269	1.25166e+06	740877	860826	906110	909656	1.08882e+06
838	748.543	52.0057	618364	166395	203538	210081	256875	289770
839	1215.52	46.5825	24265.5	27147.3	44257.7	42483.6	32549	44425.2
840	793.572	52.0243	187327	49527.5	59864	57692.7	78958	84439.3
841	795.287	36.3549	14395	9218.77	31489.1	16205.5	206553	83489.3
842	1137.25	25.9469	18880.2	5069.02	0	208.289	28549.5	5005.22
843	893.549	38.5381	28261	20628.8	296.171	0	0	0
844	948.941	47.6887	137647	102102	50570.3	35259.2	105552	82006.1
845	1030.54	49.0707	130802	97458.3	10303.7	5915.72	131762	83877.9
846	1028.45	42.761	32250.5	37243.7	0	0	28354.8	6222.82
847	520.938	64.0676	28102.7	23559.6	24165.2	23724.7	17184.7	21698
848	430.178	37.295	4807.5	7102.06	276818	310403	322229	228915
849	1022.28	28.2879	318514	271989	404956	368161	426422	450808
850	561.521	61.5473	139321	106439	92476.7	75674.3	62893.7	75350.8
851	1014.47	44.4533	230841	417927	193.636	217.563	104706	37365.9
852	273.147	31.5763	3.34825e+06	2.60033e+06	379282	309883	2.21421e+06	191794
853	936.503	48.0767	987778	246556	239528	101540	663085	84320.4
854	937.505	48.0688	273149	69534.9	66097.3	29720.3	187697	25102.9
855	322.142	47.9287	1068.11	6722.73	38294.8	41464	3990.42	55561.4
856	834.616	54.0063	245808	120118	142238	128896	123175	130827
857	309.234	25.7777	61206.1	18685.4	153329	79341	2.06358e+06	241825
858	254.101	23.3325	16051.3	10074.3	99520.9	81487.7	13696.1	36472.2
859	836.239	59.1392	84900.2	57256.4	34127.1	36368.9	23142.4	0
860	511.307	49.0182	299548	265197	418950	441874	835874	928648
861	559.359	37.9064	252062	183181	127973	114993	179519	88154.8
862	1032.55	49.0798	31984	22835.2	4547.06	1683.39	35661.8	21782.4
863	1013.46	44.455	356273	665837	264.136	0	164787	56151.5
864	1015.47	44.455	85579.4	155541	1673.49	0	40551.9	14199
865	214.253	41.0317	100460	45000.3	45490.8	49330.3	29558.4	55196.9
866	492.128	37.8216	80837.5	33263.7	32709.8	16199	14743.9	58835.2
867	644.496	53.7178	941037	533256	682234	694056	717971	844755
868	816.294	32.9898	32754.9	27190.7	396.901	226.925	63558.3	26161.4
869	792.569	52.0217	410914	108694	134251	129262	173845	183253
870	395.355	54.0595	217876	137440	167494	168127	202278	239034
871	392.148	36.7216	27278.7	15089.9	19719.2	16900.4	38552.5	91118.3
872	716.553	54.3549	461752	293624	339673	346680	295855	318483
873	207.066	32.8639	94662.6	60896.4	57913	37097.7	119330	71278.3
874	1051.65	50.6961	8099.7	7581.42	591.912	407.509	9105.06	6578.74
875	325.11	32.8614	64952.1	49807.6	50001.8	29056.7	89322.3	53554.9
876	653.371	36.2218	2549.6	0	0	0	61120.7	21933.8
877	522.211	25.0828	13419.3	12007	42200.5	18273.6	26809.2	12863.3
878	315.154	35.5377	464725	320581	185296	100843	259667	193525
879	147.043	64.0865	160449	121598	114597	102341	86039.5	93491.1
880	512.31	49.0161	116834	100670	148536	157112	297447	323793
881	815.291	33.0045	70424.7	55794.5	2080.5	281.711	125998	51162.5
882	672.527	54.3648	705788	453804	508494	528856	445356	490921
883	560.518	61.5412	392550	297155	265449	217563	203194	229729
884	791.593	54.0162	209819	105320	131996	113630	105631	115169
885	513.421	53.6894	456950	314748	342851	315336	507723	621695
886	1031.54	49.0721	86547.6	65237	8855.14	4045.04	92337.7	57198.8
887	310.916	2.1534	12993	63782.7	6450.54	12842	12402	31259.5
888	215.143	28.857	823805	760792	411621	252655	824972	243880
889	808.264	36.5006	0	0	909.261	537.064	601.408	399.609
890	369.117	32.8611	386716	250637	236781	130062	522808	310562
891	535.14	34.5097	293.325	1626.06	11675.6	20923	19328.1	38045.2
892	877.806	63.4238	91952.9	106927	18344	39768.9	9710.39	15864.5
893	1212.6	35.5355	0	0	0	0	0	0
894	862.415	45.0742	7628.33	13582.2	36944.4	18508.7	29737.3	17007.5
895	1029.44	47.6302	16264.8	3027.16	46700.5	43690.8	48312.2	115304
896	293.127	22.4479	71171.6	117079	30885.1	36135.1	175530	70043
897	688.201	57.3404	290156	145444	74009.4	115311	14742.2	16078.5
898	602.209	46.3029	117074	117698	6175.64	3197.4	180466	168205
899	526.272	39.1151	443817	299827	684700	474868	333869	216367
900	1106.31	62.9769	486184	437966	314934	269403	311677	163928
901	796.29	36.3526	0	449.624	0	1251.07	70838.7	15324.8
902	763.216	58.1583	71720	38561.7	15054.1	27914.5	0	0
903	780.348	39.2309	130291	85751.9	1865.19	205.321	36045.8	23572.8
904	673.53	54.3595	296167	185416	211697	209420	179172	187368
905	732.548	53.7035	442260	228492	287579	304554	339419	396108
906	468.39	53.7157	1.0892e+06	730944	797646	874083	888301	1.05749e+06
907	876.308	39.4585	0	5467.41	211.183	0	19657.3	13503.4
908	324.161	35.638	366180	247883	27834.9	14241.8	61095.9	50852.3
909	238.108	25.8641	3.13782e+06	2.1984e+06	409100	215787	703485	410128
910	229.017	1.95076	51308.1	281159	69645.1	58514.3	52603.1	64529.9
911	1006.39	42.1259	702.251	255.746	6482.09	5173.09	10757.4	7845.3
912	704.517	51.9861	840252	230217	284106	279039	332191	385995
913	947.937	47.6886	374298	260334	127371	101132	277271	212806
914	446.887	62.7081	0	2103.01	16107.1	19948.3	19861.9	13929.5
915	288.166	44.8698	48609.5	46943.2	18632.2	24399	81300.1	11569.8
916	904.379	42.3084	2027.49	1380.18	5198.56	2333.35	807.968	12775.4
917	631.289	36.508	647.506	1073.1	14406	8595.98	84020	16845.8
918	499.367	51.8028	50472.2	126207	182326	137815	135431	146196
919	705.52	51.9897	335497	92799.5	117426	120659	132734	152656
920	687.203	57.3399	642639	320486	175957	256982	45740.7	53347.3
921	89.0602	22.4727	47630.4	33677.4	42593.9	31636.1	30806	37672.3
922	1021.28	28.292	627300	521880	781496	707762	828169	876614
923	1033.22	25.9438	3922.25	2803.32	283.019	0	30501.5	6002.42
924	274.016	19.1886	1359.58	1562.18	4304.6	9837.31	2198.59	5556.62
925	836.595	52.0403	206633	53752	68331.3	64032.9	85941.4	90326.3
926	1107.31	62.9769	484082	433169	304391	269535	309839	162069
927	278.175	39.5613	643159	496890	416939	252397	476646	253058
928	469.392	53.7263	314240	203817	239083	247955	254095	311432
929	486.329	51.3138	101426	69046.4	144499	110027	165662	129726
930	685.204	57.3418	1.86264e+06	917326	497427	718113	140757	165772
931	1105.31	62.9769	448254	406969	287943	248838	288342	148176
932	688.522	53.7103	638166	379132	471518	496411	552080	637438
933	863.417	45.0775	6855.39	9366.22	23071.1	10093.5	15667.4	10509.4
934	466.15	38.4376	4337.92	2860.59	531636	682952	283731	255850
935	892.546	38.5289	51444.3	40847.8	0	0	0	693.729
936	493.179	47.1036	95135.3	78208.1	54340.8	21810.6	14999.5	55768.7
937	1109.31	62.9798	186007	174317	118972	102727	123855	65276.9
938	1108.31	62.981	319819	284751	200993	178876	201469	105552
939	1139.25	25.941	21235.4	9891.11	0	231.981	32197.3	6503.95
940	1035.22	25.9353	5423.58	4614	230.122	534.505	37522.9	6403.93
941	414.972	64.0556	39427.1	33124.6	29596.2	26329.7	21423.9	21911.9
942	606.089	29.6294	27920.5	29558.8	14486.1	8820.15	18635.3	9821.35
943	760.376	28.535	9591.64	13240.7	224.839	293.495	1315.96	1599.49
944	553.29	50.6937	39908.8	29453.3	24571.4	21883	33356.9	30100.2
945	1015.27	28.3013	536028	445802	162217	117689	238659	165129
946	514.874	62.6836	0	0	4336.71	8808.24	6202.63	2023.41
947	368.114	32.8656	1.76714e+06	1.10123e+06	1.07534e+06	553179	2.41479e+06	1.36758e+06
948	462.408	57.2766	434603	321521	343650	308628	274985	300835
949	371.991	64.0595	44502.4	42400.9	38334.9	30725.7	26166.5	28916.7
950	515.115	25.9395	10276.7	2980.13	0	411.69	20707.5	5534.69
951	1016.47	44.4533	28555.2	44333.2	924.822	394.879	14050.3	4677.82
952	384.065	19.7526	11133.6	67423.2	38741.8	43836.8	216677	193930
953	253.098	23.3325	20593.9	17554.6	584040	442682	57627	203304
954	1098.57	47.7936	13124.6	6423.13	29239	22038.4	29206.6	27407.1
955	965.481	48.7256	122202	171113	2256.26	2115.52	98334.2	42862.8
956	1083.41	29.187	45243.9	35629.7	45746.2	203.633	0	44750.7
957	555.178	53.8302	89457.9	18517.5	21245.7	19737.8	63187.7	66174.8
958	509.291	48.5573	1.31026e+06	1.33312e+06	2.28174e+06	2.03502e+06	6.58835e+06	4.22193e+06
959	970.497	47.6642	102171	39162.2	81523.7	57398.2	82632.9	50305.5
960	483.231	47.8856	1.65895e+06	1.08841e+06	1.65589e+06	1.50291e+06	1.27779e+06	1.37014e+06
961	686.203	57.3404	1.45559e+06	707796	391995	571632	104505	127044
962	287.162	44.8781	244729	258744	77268.1	116970	418382	49297.1
963	207.134	22.3018	328608	190025	71302.1	51064.4	125199	48299
964	925.33	19.7501	44940.9	64835.3	475.735	1401.59	26710	16149.4
965	480.237	44.4002	592119	311608	71292.6	45768.1	102609	50380.5
966	343.217	38.0436	81388.4	57994.2	200809	183044	194526	275102
967	684.204	57.3404	2.87939e+06	1.3941e+06	751953	1.11417e+06	215735	254923
968	328.13	18.9691	98997.8	69072.3	97698.8	45199.1	78746.9	51823.1
969	370.208	47.1963	27297.9	21686.3	27894.3	23349.8	24430.9	49657.7
970	629.504	54.3775	352376	212824	238213	256584	209429	236354
971	959.965	63.5991	37041.1	27843.5	30476.3	30504.5	33286.1	39564.1
972	498.091	22.9303	82877.8	89408.6	54618.9	36066.2	64190.6	44988.2
973	1039.53	42.3781	61107.2	54294.7	88033.6	119658	104524	195500
974	410.206	47.6709	1.79768e+06	841339	542782	481186	725482	606236
975	743.396	49.9934	67394	69494.2	8118.44	5714.19	35081.3	85119.2
976	344.316	49.1864	60002	57397	89108	48523	91570.8	96112.8
977	837.598	52.073	101316	23519.1	30409.2	33267.2	40143.6	42135.6
978	1002.53	49.0312	1756.86	2425.38	10762.1	6379.17	2865.41	4117.46
979	333.109	28.2834	185198	105286	26009.3	10754.1	49547.8	8020.09
980	617.354	50.3632	67659.1	51854.9	72869.1	59461.3	62329.5	69503.5
981	463.411	57.2766	121871	95805.7	97393	91304.6	77731.9	84020.6
982	262.108	27.3702	738029	790463	170086	86770	152529	153778
983	309.126	31.7619	9539.05	9945.87	36510.8	34287.8	249604	78855.4
984	530.134	33.3985	11139.2	13759.9	6167.08	3000.19	21562.5	10528.9
985	696.433	53.9671	78266.5	55458	52209.4	52077.6	67066.4	72416.9
986	971.433	47.6627	73177.7	30724.1	41180.7	35305.4	57338.1	53728.9
987	510.294	48.5576	445724	466000	772893	681934	2.14061e+06	1.38074e+06
988	107.07	22.4768	91673.5	69532.5	89432.1	63743.8	70295.2	87040.4
989	610.81	63.5759	27190.5	26114.5	26059.1	25386.9	23876.9	21602.6
990	902.814	63.4288	66449.9	93187.2	57438.6	9639.43	10884.5	56859
991	268.191	28.8685	2.00826e+07	1.03397e+07	4.54728e+06	2.60954e+06	1.02856e+07	2.6313e+06
992	272.156	28.4223	1.95868e+06	1.32198e+06	1.37148e+06	918551	1.14896e+06	664845
993	635.319	36.5793	0	470.139	9176.58	6076.81	56093.9	22002.2
994	568.246	42.3026	245894	162713	70468.2	49977.5	35581.1	18566
995	661.494	51.9688	393300	113276	143881	142469	154064	177400
996	776.574	53.6982	200928	120738	157117	154035	178818	211007
997	736.215	57.3404	568483	298775	136050	192765	46783.6	37507.7
998	174.052	6.70224	54381.8	41030	342781	474194	51037.9	202733
999	273.032	20.7427	2896.92	9069	6765.15	8398.78	26782.8	28693.9
1000	456.839	53.2218	97185.2	18971.6	31634.4	22539.3	46332.9	51673.6
1001	737.214	57.3404	438941	228544	106137	151990	29778.8	26927.1
1002	336.099	28.2886	147831	98171.5	15375.3	1853.13	57572.5	49419.8
1003	673.348	36.2412	58700.5	57638.3	55224.7	50584.4	264139	166075
1004	509.127	25.9399	41282.9	22131.2	0	207.944	36603.7	10179.7
1005	341.263	29.1877	352678	178055	197891	12065.8	65316.1	223063
1006	927.468	50.0897	13366.5	10382	24474	16282.5	8250.04	10342.8
1007	774.363	28.5378	0	1244.42	650.995	198.227	576.564	2952.8
1008	416.391	55.5976	126932	171201	140040	154251	118717	114618
1009	1163.63	49.004	0	211.135	4588.72	5539	59481.4	21115.9
1010	280.244	47.0922	135367	158599	54736.8	44070.5	53825.5	58752.5
1011	540.448	54.3977	1.20896e+06	755730	814454	891037	739518	812936
1012	682.347	39.2106	1128.22	13238.9	5964.53	3945.26	39132.1	45584.2
1013	508.15	36.2443	46539.3	44054.6	82314	64658.8	25311.2	85851.2
1014	226.951	62.5099	1.6615e+06	1.25675e+06	1.37536e+06	1.31906e+06	1.22306e+06	1.19188e+06
1015	1218.49	33.0457	87967.1	63461.1	653.948	421.139	30459.5	7364.3
1016	1164.63	49.0062	257.133	0	2801.4	3578.13	13948.6	16004.4
1017	660.49	51.9688	1.07806e+06	299363	378335	389208	410153	474713
1018	1055.3	62.997	72343.6	67802.7	38028.6	37246.2	56110.2	12885.7
1019	385.068	19.7533	0	0	1014.55	629.104	42957	44110
1020	1119.39	48.1325	50768.4	18605.5	47064	36239.8	45099.3	30878.9
1021	720.318	33.1074	10446.6	12892.5	3081.43	1925.1	13718.2	68219.1
1022	334.868	63.5488	26642.1	21567	23399.6	19784.4	19681.8	21668
1023	819.358	47.7829	36536.6	20814.3	51733.1	34138.8	31442.3	47788.1
1024	733.55	53.7135	192221	105400	135420	131713	144569	170343
1025	431.181	37.2807	1191.52	1080.5	41244.1	43067.2	39708.2	29846.6
1026	524.306	34.1785	1.26099e+06	1.03994e+06	805116	412614	937729	218557
1027	314.945	64.0769	21052.1	22178.6	22608.9	29227.8	26223.1	27547.2
1028	616.351	50.3614	142237	113007	158501	138525	143163	158170
1029	325.117	6.69956	6099.68	6389.9	57891.6	90756.3	8505.08	33310.1
1030	1054.3	63.0039	67496.3	67715.6	35796.4	34849	53749.5	13251.6
1031	689.198	57.337	99993.4	44145.2	22842.1	38733.9	0	0
1032	616.35	47.8063	406008	287014	549333	473853	391077	505704
1033	1040.53	42.3781	39983	38478.1	49075	87313.2	69725.4	130170
1034	548.195	32.023	2629.43	2923.88	14367.7	5336.74	27080.6	7130.92
1035	477.269	48.0893	1.81768e+06	862936	852804	482404	1.12968e+06	433057
1036	536.203	19.9489	1190.77	160152	0	0	3533.64	1364.04
1037	125.035	63.3909	97191.4	62278.4	64260.8	59270.5	52602.1	54157.7
1038	773.359	28.5406	10957.7	22239.2	349.613	200.533	1915.92	7508.16
1039	689.525	53.7118	262401	160962	202238	198787	222870	253826
1040	746.564	54.0257	782618	447910	559349	523412	456480	504341
1041	1165.63	49.004	258.333	467.029	2402.54	1902.93	3908.41	5162.75
1042	702.37	36.2238	14797.2	656.035	2647.79	0	30685.3	42452.6
1043	1056.3	62.9953	68040.9	67004.1	40402.1	34295.2	56559.8	14783.5
1044	490.145	33.4182	4148.99	4767.89	3175.11	736.053	8747.58	4153.2
1045	904.483	50.0914	17768.2	22527	40733.9	21333.9	9008.56	10763.6
1046	501.232	32.0184	9204.58	8282.99	210520	121629	196657	89974.6
1047	95.0857	28.854	164924	90789	44423.6	26575.6	96591.3	30750.2
1048	614.182	56.7351	310002	185489	115761	148139	5443.06	33905.7
1049	912.399	39.246	148351	120698	34172.7	210.573	208735	81821.2
1050	950.336	36.6618	50264.4	39939.2	0	0	14967.4	5935.73
1051	564.202	48.9478	58376.2	51228.1	11841.9	7167.85	85798.3	94130.7
1052	368.216	45.2502	1.60405e+06	875013	269091	181446	305057	104227
1053	500.229	32.0183	26557.9	21660.3	690674	380014	641121	279579
1054	915.343	33.4026	64880.1	51713.6	4337	840.334	36110	12484.2
1055	898.385	36.265	0	0	57121.9	34338.5	137763	49640.3
1056	556.117	42.0019	35433.4	41540.7	54621.4	43991.8	75981.8	125986
1057	1038.55	48.5487	3340.08	7411.42	8469.26	7416.32	14607.1	11032.9
1058	1219.49	33.0424	69435.8	49312.3	234.672	0	25986.9	5008.87
1059	790.59	54.0097	449338	227327	286114	257538	231626	252373
1060	314.151	35.537	2.2065e+06	1.51011e+06	842225	450312	1.21165e+06	906282
1061	812.291	36.4918	574.608	600.73	394.736	1447.15	99522.3	26144.6
1062	1025.51	47.9789	9740.81	11551.1	0	503.07	7855.92	16711.3
1063	1199.38	34.5025	0	0	21236.9	21629.5	31504.7	44193.3
1064	835.619	54.0074	132393	54917.2	68612.8	57011.7	52928.1	61679.3
1065	766.417	37.8772	41823	0	40909.2	23425.7	14434.9	17367
1066	675.707	28.2822	0	0	0	0	2719.8	0
1067	819.338	28.5513	42262.6	49646.2	1767.11	735.151	8840.71	8813.81
1068	1024.58	51.1813	20706.1	2800.33	11072.1	12687.2	16260.1	17203
1069	502.235	32.0063	6623.83	4171.38	48994.6	26979.1	44520.1	20659.9
1070	869.372	34.3681	18739.6	20686.5	665.094	202.595	6734.09	1065.23
1071	431.319	53.8934	182469	130384	161987	144630	161814	162185
1072	659.515	54.0497	744685	425801	512864	500620	430111	503935
1073	554.177	53.837	151870	37965.1	46443.6	51892.4	127553	134171
1074	1081.41	29.1861	118850	100278	127466	75092.7	77581.7	119474
1075	564.264	28.2988	145632	115831	82746	58910.4	96642.5	73143.8
1076	913.338	33.3992	357351	278315	22786.1	11288.9	327850	82918.9
1077	754.404	44.4606	36380	46003	779.918	438.485	14470.6	11323.8
1078	617.467	51.948	448355	138400	170504	171781	166357	198924
1079	613.184	56.7341	716810	437428	267887	357176	38760.9	81617.8
1080	320.171	45.7089	27159.8	24147.3	13477.5	13643.1	33022.5	13983.5
1081	749.546	52.0093	270296	73615.3	87098.6	89780.9	105789	123040
1082	832.455	29.1854	411188	279727	253455	311.894	2047.09	206455
1083	747.567	54.0251	356689	194718	242042	223736	188638	210867
1084	703.541	54.04	555959	311062	381260	371181	323513	362541
1085	973.298	37.2752	0	238.79	34237.6	42571.2	47183	30780.8
1086	584.475	54.3875	1.14131e+06	677768	749055	797028	670731	733335
1087	90.9766	62.5099	561276	434511	465012	432219	402153	391148
1088	712.496	53.9561	83331.6	46777.5	55191	54258.1	45614.7	54086.3
1089	266.948	63.4645	35135.1	28197.3	29982.1	28199.3	27220.1	29629.8
1090	1058.52	48.5589	4309.28	10751.8	24227	17402.7	29813.5	28724.7
1091	615.181	56.7351	95940	58240.7	29933.8	46259.8	0	0
1092	304.3	43.7856	7034.4	50749.2	46117.6	45594.3	25501	75663
1093	357.11	22.9339	442644	329490	133578	88551.2	264222	117259
1094	1009.39	34.2935	0	0	19791	9216.93	23868.6	11435.7
1095	1241.43	34.1635	20668.1	0	36771.3	20603.6	8932.45	8131.04
1096	832.403	35.5486	0	0	0	0	0	13975.9
1097	448.307	51.3029	185917	115111	149475	116636	148818	117327
1098	616.464	51.9491	1.30643e+06	392719	483716	494523	480710	568237
1099	735.215	57.3404	819998	411759	204618	283811	65409.7	58143.8
1100	485.142	37.2641	581.204	3264.94	38338.4	51724	48270.6	47665.8
1101	1048.43	37.7085	160478	85858.1	2111	469.603	56345.9	15544
1102	540.535	53.5432	488778	293905	365134	159147	589097	715709
1103	548.231	47.5996	1885.52	0	148603	96761	180031	406324
1104	179.07	19.178	40767.5	31570.1	82725.4	96310.9	113608	58453.2
1105	539.35	53.5675	270623	179609	225610	233976	252162	288768
1106	874.809	28.3	0	0	0	0	11389	0
1107	539.165	56.076	121808	141237	95234.1	103190	0	16833.8
1108	1091.39	48.1004	27495.8	17495.1	34711.2	24337.4	25527.5	18044.1
1109	281.122	23.8427	90519.9	89989.9	24405.1	15432.7	12791.1	6029.73
1110	979.478	48.9603	89061.9	62377.1	3956.5	3183.16	48410.9	23902.9
1111	511.012	48.5573	8539.88	10233.4	15713.6	13131.5	36530.8	24315.1
1112	1036.29	61.4532	120948	124122	82052.5	75170	100361	33880.9
1113	475.236	45.6377	300360	163941	43673.6	92278.3	140329	77233.1
1114	914.341	33.3992	201962	149633	6396.67	4627.71	160296	38885.8
1115	334.22	44.8896	192273	137791	40477.8	44132.8	102319	14392.1
1116	722.352	38.8699	1.3466e+06	1.04026e+06	36836.5	13842.6	316969	365633
1117	242.985	64.0261	81941.5	65002.8	63008.3	53627.3	43415.5	45958
1118	721.348	38.8699	2.84694e+06	2.12099e+06	74965.5	25393	630224	767784
1119	257.165	22.7355	306367	392689	1.12125e+06	817970	4.35742e+06	2.41057e+06
1120	967.484	48.7117	31194.1	41728.1	851.36	2000.24	25456.3	15185.3
1121	231.17	9.54727	22602.1	20859.9	13257.4	13319.4	27379.2	72239.9
1122	585.478	54.3885	395587	227079	260001	283482	235320	252346
1123	423.259	53.8449	36024.4	43228.1	61491.6	43584.3	201460	265800
1124	302.934	63.2535	50822.8	38879.3	43680.3	47793.3	72144.5	67532.1
1125	935.5	48.0815	2.96462e+06	682633	654812	273921	1.93285e+06	232366
1126	658.512	54.0475	1.97266e+06	1.12955e+06	1.37893e+06	1.34488e+06	1.15418e+06	1.3473e+06
1127	372.145	28.3315	208220	134903	40304.6	12060.8	65816.7	24426.7
1128	925.463	50.0937	24443.2	22089.4	96455.6	54726	15040	26665.9
1129	1066.51	46.5268	50174.7	63849.1	4874.98	1531.52	67565	73893.3
1130	342.171	35.6335	515751	337508	38366.5	23611.1	115907	11643
1131	323.1	19.7471	123859	112055	35317.3	36362.7	74988.8	67712.1
1132	518.385	53.8056	163248	139037	146088	153826	149310	173839
1133	357.109	28.2992	7.70382e+06	4.81559e+06	1.73095e+06	989238	3.20578e+06	1.31657e+06
1134	762.558	53.2077	526943	141217	171016	168281	212906	233301
1135	926.465	50.0937	16583.3	15072.3	64387.1	37819.4	11042.5	17387.9
1136	934.496	48.0767	5.20161e+06	1.16912e+06	1.125e+06	458866	3.32464e+06	391799
1137	806.585	53.2077	351916	87758.9	111184	112298	143711	161196
1138	807.587	53.1876	168600	41715.9	48618.2	50451.1	69875	73934.9
1139	1069.44	46.304	49591.8	37232.2	265.666	0	32325	18625.4
1140	984.342	37.6653	65709.8	42547	24562.6	30144.9	63484	40641.5
1141	496.14	37.7085	56114.5	51722.4	45846.3	33358.7	80400.1	106759
1142	949.334	36.6702	89033.3	75331.6	0	0	28478.1	11404.8
1143	269.194	28.8639	3.81765e+06	1.65893e+06	744458	453270	1.66923e+06	453111
1144	831.452	29.1873	921989	637493	568542	1346.24	1432.9	464559
1145	362.327	40.7433	1.0686e+06	300495	481026	226951	602051	687774
1146	418.175	35.5619	123687	109132	97050.1	67178.5	83121.7	123128
1147	612.184	56.7347	1.83356e+06	1.10289e+06	704095	905486	106618	207166
1148	731.493	58.2996	98972.5	93134.7	72963.5	80079.1	69953.5	64518.1
1149	133.034	63.3979	13944.2	11543.4	11407.8	13861.9	21863.1	21603
1150	620.133	32.8294	2197.04	1188.36	9392.22	10249.1	15364.7	9902.2
1151	1109.46	34.1658	0	0	17174.2	1277.25	0	0
1152	1376.7	50.0902	549.112	845.388	10167.9	5247.87	235.388	1824.04
1153	271.21	37.7547	1.23841e+06	798653	195528	120033	542984	103429
1154	288.218	38.6331	842543	454110	11474.5	10721.9	81254.1	10558.3
1155	445.121	53.9268	200152	66118.4	80838.7	78987.3	147299	154400
1156	1054.54	48.5984	31921.9	42747.6	2078.74	1337.18	112002	41631.8
1157	388.163	38.3165	451748	225397	91043.3	98931.1	178544	74416.5
1158	1024.51	47.9789	13483.9	19901.7	1779.11	1162.88	9421.89	25420.7
1159	1377.7	50.0902	0	645.427	9127.98	5096.22	1395.8	1482.92
1160	328.9	63.4802	53625.4	42484	43834.3	48224.3	47398.8	51948.9
1161	1063.44	50.0864	838.609	601.954	13651.5	6806.25	2203.29	1352.64
1162	303.242	54.5915	15570.3	18447.7	40123.9	37104.4	29064.7	66293.9
1163	903.48	50.0937	11878.5	16913.3	56502.5	32538.8	8041.08	13374.2
1164	702.538	54.0406	1.34897e+06	772798	975154	938349	798034	896037
1165	880.622	52.0765	100669	23381.9	32175.8	33695.7	42250.8	44808.3
1166	973.496	35.5284	0	0	0	0	0	0
1167	962.438	47.678	436073	290414	352134	312378	231347	341097
1168	622.339	53.0997	89166.5	78744.2	80838.7	62842.3	94357	116004
1169	202.069	28.2978	276048	167993	50105.1	23829.1	93439.7	31595.4
1170	610.185	56.7381	4.409e+06	2.56088e+06	1.60461e+06	2.11306e+06	240727	489695
1171	286.2	37.1019	172211	12753.1	5730.3	51998.1	77413.4	51954.2
1172	615.488	54.0576	884608	488251	575202	570179	501725	559054
1173	604.316	39.4887	17939.7	16077.8	4000.94	2023.46	7886.09	14503.5
1174	497.215	49.5901	876664	955861	46182.1	35852	63369.4	50089.1
1175	163.133	22.4751	674329	486241	647042	505407	531781	634714
1176	759.374	28.5415	87141	85789.7	2851.79	986.196	7370.85	22311.5
1177	527.436	54.0691	912971	497551	614549	596406	533710	616629
1178	437.231	51.6272	1.18161e+06	969127	588011	386677	673577	394219
1179	304.167	42.4968	166524	133231	12775.8	9153.26	20479.2	11027
1180	541.452	54.3875	401947	243596	266248	294972	240945	260601
1181	165.127	47.3837	29253.2	22952.2	11216.2	10318.9	105817	80697.3
1182	442.152	40.2126	22897	14576.6	63853.9	74597.9	105199	86660.2
1183	873.38	40.5797	5259.85	4992.73	197.985	225.634	37106.2	2900.46
1184	270.206	28.6897	1.19039e+06	819377	363034	219187	792241	271285
1185	1036.54	48.5613	5138.72	11843.8	27854.6	19076.6	30049.3	23145.5
1186	329.114	28.2992	664895	401812	141624	84467.5	264070	113988
1187	275.259	53.8737	98332.5	74018.7	97682	102242	140595	167167
1188	758.372	28.5402	319801	313514	15796.3	6719.34	30831.6	80091
1189	292.285	53.8761	71682	54279.9	73646.4	79757.3	111367	127388
1190	611.186	56.7381	2.503e+06	1.48053e+06	937451	1.24227e+06	138086	274821
1191	1075.56	49.0107	2509.68	2002.76	1481.62	984.836	32770.7	20335.4
1192	563.261	28.3039	435718	346809	237817	177707	289708	222985
1193	1065.51	46.5268	77814	92933.8	4791.58	1645.28	103745	109423
1194	217.99	22.1953	0	4284.53	3459.81	3915.24	15648.4	6738.79
1195	593.309	49.0084	122041	109915	283599	295255	435534	590442
1196	260.129	35.8342	33570.6	27779.5	35099.5	11205.4	12528.9	12511.3
1197	1062.44	50.0937	3647.51	3795.5	36122.9	17454.3	5686.04	5847.86
1198	1648.69	34.1635	0	0	14269	0	0	0
1199	533.233	27.6755	226934	189372	40296.2	19111.3	62267.6	27145.1
1200	201.066	28.2992	1.90911e+06	1.15455e+06	403672	237914	768789	311583
1201	718.532	53.2295	757128	192670	242323	241330	288104	329432
1202	757.369	28.5303	626276	623867	33189.3	12368.4	58960.8	166960
1203	719.33	37.9196	74140.7	52017.3	25544.4	6566.75	91615.3	49333.8
1204	914.386	39.2436	9636.45	18980.6	709.504	200.791	24046.9	11209.2
1205	916.346	33.4017	18072.6	14674.7	1531.05	1251.85	17441.4	5709.71
1206	903.26	37.4977	179474	78411.9	25931.5	11692.1	130634	48219.1
1207	431.205	42.6206	240627	197059	37608	27185.1	137981	51292.1
1208	438.234	51.626	334526	272947	165118	115400	191754	111722
1209	377.17	25.3889	1.03297e+06	1.09752e+06	771999	568666	2.96476e+06	1.60979e+06
1210	275.162	31.1845	1.52979e+06	1.27885e+06	584751	451780	1.73348e+06	557043
1211	358.112	28.2992	1.62491e+06	977518	335477	197053	655743	256087
1212	675.509	53.2091	368117	105561	127640	119636	133793	151219
1213	719.535	53.2035	301815	76012.7	101147	97245.7	117992	132179
1214	1000.41	39.5179	0	208.115	61504.6	40836.2	94174.3	23158.3
1215	388.142	32.5061	44554.7	42786	8448.55	5732.64	8316.25	6979.5
1216	474.226	50.0973	93576.7	91483.4	471401	374919	130621	165177
1217	1074.56	49.0002	49212.4	43072.6	6879.5	4030.16	116198	77150.1
1218	270.207	37.756	7.61088e+06	4.48031e+06	1.12153e+06	660544	3.32915e+06	547164
1219	1041.43	42.7552	53868.6	50002.7	0	19213.5	25439.2	9193.52
1220	545.327	45.1953	473558	178711	298282	88030.7	95027.7	144507
1221	471.844	52.1078	115903	23997	34706	41024.5	38995.6	49385.8
1222	490.145	35.2798	1379.92	3323.01	417.458	1246.72	11044.2	3754.21
1223	682.311	33.1007	69731.9	51473.7	3244.54	207.479	55277	88847
1224	362.926	62.5099	620294	464955	494299	455429	434948	398953
1225	595.172	50.8647	93236.3	62972.1	84537.7	44658.2	37771.7	86370
1226	852.475	51.6246	166900	197344	58420.7	27894.2	109517	28158.1
1227	482.224	48.1194	4.12522e+06	5.20571e+06	3.63218e+06	2.85483e+06	3.14351e+06	2.37903e+06
1228	598.123	37.2522	833.793	4214.63	74921.1	94776.5	51498.7	70788.3
1229	839.376	41.6458	2595.89	41529.9	90274.8	55250.2	170122	32107.4
1230	391.141	25.2621	3086.46	3766.64	45429.5	35600.7	34293.8	24879.6
1231	594.313	49.0213	43770.1	40841.7	110034	116289	167819	217309
1232	987.266	37.4863	132873	120909	60209.6	33166.3	127413	91597
1233	304.212	14.1766	142517	110622	9627.2	10616.9	42609.2	11321.2
1234	578.173	45.1139	34343.9	7891.22	28423.9	19437	16034.7	9654.97
1235	1121.42	34.1658	0	0	18130.8	761.218	0	715.064
1236	272.201	37.6675	461542	315170	136108	107486	226783	104820
1237	674.506	53.2091	949737	254985	312933	314177	353743	394141
1238	364.316	53.8802	104852	60907.1	81344.3	89524.9	107268	131257
1239	1072.55	48.9908	180179	165111	21265.7	7974.58	431104	288382
1240	632.213	22.9293	283927	169068	84687.3	50656.9	75304.6	52765.9
1241	573.441	51.9253	479433	160245	197730	194007	166400	197513
1242	1073.56	48.9946	124491	111780	14566.6	5636.03	301278	198637
1243	963.267	60.1994	65042.4	59814.6	28991.4	32891.2	44475.4	2070.5
1244	924.327	19.753	90040.3	129870	9211.61	9934.54	61714.6	49172.5
1245	913.399	39.2427	68554.4	59869.6	0	0	74306.6	31523.9
1246	851.472	51.6311	289052	344741	101311	43804.2	187748	44550
1247	413.157	34.0612	274128	144002	2009.17	2843.15	12426.5	11283.9
1248	626.192	34.1498	669.475	0	30481.5	29062.4	15870.9	21968.1
1249	614.485	54.0571	2.53301e+06	1.37223e+06	1.64476e+06	1.64663e+06	1.40594e+06	1.61266e+06
1250	1061.44	50.0937	1781.86	1109.99	51578	25613.8	4502.17	7114.33
1251	428.243	44.9629	698376	480972	939845	676512	354975	321333
1252	1105.45	34.1641	0	0	832665	274080	252107	78752.7
1253	1106.46	34.1635	0	0	555190	186921	171225	53000.2
1254	219.063	18.8748	983979	724070	48046.3	40078.7	255167	108806
1255	263.165	35.3702	137690	64205.2	116755	56109.8	146813	71423.8
1256	602.124	38.4258	0	0	101560	130449	56492.8	50812.2
1257	1108.46	34.1635	0	0	66304.9	23318.7	17166	7106.11
1258	538.165	56.0837	339589	390914	271785	303541	23034.2	56071.6
1259	536.166	56.08	950559	1.09386e+06	778670	848406	74760	163719
1260	426.114	36.2078	0	0	653.346	3901.46	47776.5	19317.5
1261	496.422	54.4111	1.046e+06	667398	725209	818718	648043	682524
1262	537.167	56.0806	481934	546624	397239	423641	38395.9	83256.4
1263	407.781	52.0611	37136.9	8173.78	19743.9	16122.4	21244.3	30787
1264	1447.42	28.3017	115881	130122	30645.2	4464.21	131053	43597.7
1265	637.134	34.5103	0	3353.02	48484.5	46940	40379.6	50535.5
1266	486.237	48.6708	246222	204936	8214.83	5060.71	109182	89593.8
1267	291.974	63.3841	33677.9	25176.6	26447.8	23805.6	23259.2	21359.4
1268	522.211	32.0207	5978.07	5333.37	79473.5	45918.7	62851.3	29877.8
1269	342.205	38.0049	374613	244163	846789	807391	641737	1.1445e+06
1270	258.168	22.6855	14616.3	81670.2	212679	159389	785252	442155
1271	630.48	53.1992	1.15383e+06	317735	384791	373134	409899	480470
1272	879.355	29.0488	59599.3	45997.6	0	0	72454	8628.63
1273	532.091	28.2052	766132	606252	49440.9	62573.1	140634	123277
1274	751.357	38.8434	233516	191577	5115.17	713.065	51039.5	47158.9
1275	800.383	35.5376	74244.2	96110.3	44681.9	8828.16	55620.8	104903
1276	452.244	50.0977	646665	852312	3.71047e+06	2.90673e+06	712294	1.31934e+06
1277	799.38	35.5452	150176	193084	94773.6	36327.1	109349	194984
1278	594.162	50.8559	250285	163484	207535	96011.3	67596.1	219258
1279	878.643	53.9954	139206	62897.2	73818	54721.9	284886	58103.1
1280	1107.46	34.1635	0	0	219766	75174	67990	23412.9
1281	1059.54	48.5617	6675.22	12075.1	16734.7	12840.8	22974.5	23576.2
1282	726.383	36.263	1.80133e+06	2.3743e+06	4.61221e+06	2.73555e+06	1.44639e+06	9.457e+06
1283	728.387	36.2591	94956.6	127483	218815	133754	78733.8	423544
1284	866.33	27.1128	80094.1	66802.9	0	0	11689.8	2536.08
1285	395.143	40.4372	5965.47	5170.63	31354.3	29054.2	11973.4	8961.87
1286	476.265	48.0688	6.42918e+06	2.90834e+06	2.92003e+06	1.62785e+06	4.00717e+06	1.47779e+06
1287	394.353	54.0574	847614	550585	647314	668305	760658	900550
1288	811.344	37.2577	60937.3	37519.2	0	0	2448.59	204.87
1289	741.329	41.423	1342.56	10409.3	5522.64	1425.81	22276.7	9084.98
1290	345.232	49.0534	9472.33	9711.86	26860.4	38146.7	23658	26401.3
1291	242.173	15.1458	14267.9	10262.3	185087	90544.7	491938	537686
1292	815.403	35.5496	43223.5	10799.8	0	0	25222.1	28854.3
1293	426.125	31.9001	900.036	228115	32891.8	22828.4	18169.8	35613.6
1294	1042.95	46.294	94011.5	53144.5	239.662	203.436	27776.7	6137.92
1295	560.191	48.9303	119030	57809.5	21386.3	9413.74	43334.5	60227.4
1296	727.385	36.2612	475756	620137	1.13176e+06	680702	373489	2.25116e+06
1297	241.17	15.1089	23011.7	96664.6	971836	467125	2.73496e+06	2.99862e+06
1298	1221.53	46.5888	11413	13415	36329.8	44970.9	49259.3	87243.4
1299	604.139	37.2812	22625.1	40847.3	244716	293775	222873	228844
1300	558.096	32.857	14996.9	16542.2	23540.7	16262.3	45517.1	31582.8
1301	1222.54	46.5805	8803.15	11252.4	27838.1	34808.8	37152.4	62927.7
1302	734.374	28.4915	14591.8	15884.4	0	0	0	3687.08
1303	471.195	47.0998	195167	158957	76208.3	27358.8	9277.64	66115
1304	817.219	36.4816	2127.49	0	215.727	372.718	7490.14	2505.04
1305	595.315	49.0171	5786.27	6606.67	30371.1	32033.5	34687	53507.8
1306	725.38	36.2676	3.73392e+06	4.95863e+06	9.92186e+06	5.87689e+06	3.00985e+06	1.9843e+07
1307	618.199	48.1006	145226	107580	138512	115497	94142.9	90351.2
1308	572.438	51.9228	1.51366e+06	499042	610825	614391	507787	603118
1309	504.143	41.4689	36963.4	31765.5	7585.38	4903.67	21198.3	21069.2
1310	738.213	57.3386	205481	101437	48226.6	67506.2	7107.46	2261.55
1311	341.208	52.83	118313	103366	236601	97778.1	166106	173543
1312	461.39	49.0852	15942.6	1610.16	3482.15	5471.89	133223	29096.5
1313	1294.56	48.5547	1722.66	4896.96	6533.75	5611.37	45106.4	19455.4
1314	761.306	38.5664	53626.4	7357.36	3328.39	3450.35	17928	71298.9
1315	230.089	38.2874	2540.53	0	19504	28177.8	27977.2	68046.6
1316	302.101	27.3539	175259	218300	55202.6	34420.7	49831.5	54449
1317	433.13	37.4908	0	5048.03	908.996	2847.02	62927.9	19995.7
1318	335.096	28.2984	870893	547202	204142	136710	349439	180767
1319	416.254	51.6152	134755	71964.3	56604.5	61773.5	61209.8	42112.7
1320	410.233	44.9621	273664	205326	369479	282794	147275	139815
1321	271.209	28.6847	203588	139136	67008.5	41228.1	133219	51571.3
1322	270.207	36.7659	1.7164e+06	1.03373e+06	297023	225409	686029	180029
1323	410.14	36.2329	316008	169672	196655	142165	73504.1	116875
1324	486.188	22.9297	1.01255e+06	745294	417709	228899	294042	210565
1325	823.845	34.1635	0	0	17301.1	4317.5	0	0
1326	350.327	54.0566	300510	203554	241674	241407	273162	315870
1327	1016.27	28.3022	398754	188122	86042.4	61032.9	142494	91057.2
1328	1067.44	46.3061	202410	161828	1729.78	690.302	125998	81629
1329	501.206	29.6344	1.00041e+06	553584	123966	45862.1	118219	45767.9
1330	456.353	21.8255	183941	126186	100206	2303.36	2752.29	90171.9
1331	580.278	39.2705	188069	93701.3	6866.21	3018.24	72640.1	39067.8
1332	526.433	54.0699	3.10416e+06	1.6444e+06	1.96066e+06	1.97452e+06	1.68281e+06	1.96257e+06
1333	862.327	37.7153	126304	85659.2	3065.64	838.766	79404.9	63809.7
1334	602.124	34.5128	11436.2	28576.7	239174	237808	192448	253385
1335	282.205	39.4535	215370	94985.7	149215	180821	128836	172726
1336	944.274	28.3013	887029	637484	284983	186359	378774	255268
1337	345.197	51.503	48130.7	34651.2	26778.9	20531.3	21564.4	17494.9
1338	520.138	28.5656	33427.1	29542.1	11535.2	7687.06	13532.2	26105.7
1339	930.318	25.2127	725371	661146	73774.4	86476.9	401360	138655
1340	801.348	41.3559	90811.3	83236	6753.55	2881.46	98690.1	23566.9
1341	170.116	14.416	81605.4	56387	17062.1	13325.3	58102.4	20678.7
1342	379.317	53.7132	42149.4	23429.1	29575.1	28445.2	88704.2	103967
1343	429.794	52.0748	51780.1	13983.7	30497.3	23357.7	24746.9	38418.5
1344	1647.69	34.1635	0	0	29969.5	5230.85	0	430.416
1345	634.326	39.2875	14769	31291.6	8700.21	5169.66	20733.2	31669.3
1346	571.462	54.064	921631	505919	608114	603644	516925	588568
1347	336.2	20.887	2.34542e+06	1.3367e+06	303323	163208	868001	159979
1348	271.206	36.7642	310251	185447	52841.2	39375.1	131199	33204
1349	499.133	35.8962	48918.3	29883.2	8372.04	21964.5	46899.4	26137.4
1350	390.18	28.5364	1.35315e+06	1.11081e+06	376658	258103	409752	807319
1351	325.228	31.804	615874	858346	2.30759e+06	1.08582e+06	4.22683e+06	3.21018e+06
1352	1049.31	35.3117	8526.08	16192.8	616.32	0	59746	6039.2
1353	430.914	62.5099	601701	451684	518332	496023	482750	438375
1354	1646.68	34.1635	0	0	27930.6	4888.5	0	0
1355	530.135	35.2986	6765.07	8135.74	1267.96	2946.76	27010.8	8133.7
1356	586.454	53.193	1.29581e+06	361547	437267	437407	446555	523957
1357	112.05	2.54695	93567	139783	89126.5	64931.1	108349	244876
1358	771.525	47.8465	519412	147095	4935.61	0	640362	39563.7
1359	311.224	48.3894	350801	223168	49404.5	39056.5	36848.4	45901.4
1360	631.483	53.2157	413169	117442	148641	142943	148438	169945
1361	500.203	29.6355	3.60053e+06	1.93067e+06	421439	152277	389309	147758
1362	767.354	36.2077	285722	290252	50717.4	4799.25	310657	504957
1363	764.968	64.0835	23088.3	31178	33565.1	35635.7	39002.3	44661
1364	514.219	35.2996	780151	432258	79723.9	48507.1	270340	77663.5
1365	335.197	20.8878	1.22043e+07	6.73164e+06	1.45199e+06	755079	4.25569e+06	749153
1366	84.081	47.0282	62810.3	38902.6	18307.1	14503.4	29512.4	14335.5
1367	909.469	50.9562	44790.8	31795.2	56201.7	34703.7	29281	42607
1368	304.262	54.3919	94050	82418.5	18472.4	55752.9	43251.8	124648
1369	617.196	48.1007	448834	304302	424173	359914	291764	260642
1370	770.522	47.8465	1.03003e+06	282184	7441.86	9576.01	1.26944e+06	87367.5
1371	347.184	41.4321	517966	431231	281262	250257	635319	190593
1372	332.976	63.354	48806.1	43343.5	50682.7	48830.7	38312.6	31009.3
1373	553.263	42.4515	64834.4	63542.5	15074	16151.6	52333.4	28326.8
1374	415.249	51.6202	411242	253084	114720	126197	203856	132353
1375	811.363	35.4493	0	0	1516.95	14048.4	36905.4	65502
1376	570.459	54.065	2.86791e+06	1.53638e+06	1.88048e+06	1.85901e+06	1.56083e+06	1.82273e+06
1377	297.139	10.4165	110787	115185	119225	71576.6	166007	117156
1378	833.456	29.188	116065	84579.2	74531.6	1001.81	1480.69	58323.9
1379	632.208	34.1616	0	0	36790.1	31154.7	26288.8	26839
1380	856.339	36.2696	2455.88	28610.9	55685.4	25437.7	7196.05	82259.7
1381	135.005	2.15558	40177.3	188755	28195.8	34770.1	28282.4	55013.8
1382	1483.7	48.9478	108298	80619.6	0	0	94695.7	36894.3
1383	549.245	28.3013	132942	107354	106322	77124.2	90484.3	74425
1384	1082.41	29.1865	75007.2	60753.9	78278.6	220.767	465.013	77630.3
1385	862.45	50.0625	20741.7	30129.3	26992.7	16918.2	21579.7	19671.4
1386	294.939	62.515	980757	676088	677205	601204	527257	449260
1387	487.191	22.9297	289714	212584	113842	66879.5	80222.7	58377.7
1388	297.243	49.1983	1.00844e+06	659994	176955	61487	31971.3	206987
1389	1068.44	46.3045	135039	104881	913.69	220.61	80522.9	46017.9
1390	749.25	48.5514	15619.8	20456.1	42757.6	46142.2	47838	62680.8
1391	927.323	25.1985	160281	143860	21324.6	23420.2	82116.7	29558.4
1392	364.299	54.8906	193348	198071	219454	252281	207955	223248
1393	569.193	54.2734	284001	115168	122883	130275	138653	151485
1394	511.253	46.4059	1.52365e+06	540489	426563	378520	280610	320164
1395	810.359	35.4554	0	0	19921.9	38200.6	81455.8	125826
1396	603.127	34.515	2771.28	10514.3	78198	75305.1	62620.5	79101.4
1397	1086.48	34.1635	0	0	41564.7	12400.7	11448.7	3231.45
1398	409.221	45.1212	104145	73232.1	249922	160359	115365	62516.8
1399	575.307	39.6458	21813.4	20747.1	10359.5	7656.07	36552.4	11284.8
1400	232.17	16.6103	101910	132660	79026.5	118009	81219.2	159887
1401	783.347	36.5015	479393	219984	124181	65440.6	73247.8	104577
1402	412.359	54.8477	42679.4	65001.5	71964.8	71904.9	63115.7	49394.2
1403	343.214	19.7627	94575.1	63440.7	36839.1	27387.4	31410.3	30273.8
1404	422.303	53.2195	180604	87518.1	113061	132029	432012	133527
1405	1242.43	34.1635	0	0	25258.4	13910.7	0	5030.69
1406	1110.78	62.519	18420.8	12437.1	20500.7	28915	22292.7	9834.6
1407	423.156	37.4974	1.79874e+06	1.05185e+06	251372	144442	764535	232237
1408	712.356	36.9968	24455.4	21627	1035.09	582.54	16842.1	4345.94
1409	995.454	44.394	153102	185060	452.816	672.583	74139.9	22891.8
1410	458.139	37.5207	292792	169386	46412.1	38674.4	82015.8	73632.8
1411	566.097	37.5418	143864	83693.7	49471.9	38066.8	43456.4	47360.8
1412	454.348	21.8258	8.67093e+06	6.01809e+06	4.6359e+06	117076	111219	3.94718e+06
1413	818.353	47.7714	36588.7	84422.1	98511	67042.1	59278.6	98289.9
1414	405.146	31.7564	1749.42	11537.4	55403.2	46579.1	37478.4	84805.6
1415	448.21	45.1275	449048	568680	3.12722e+06	2.53634e+06	1.6818e+06	1.05263e+06
1416	479.394	55.8333	33342.7	57169.7	60397.3	41228.6	36529.2	37467.9
1417	878.373	30.9848	231050	186013	790.348	1513.9	57640.9	7971.26
1418	621.384	27.0453	73465.5	64282.2	50040.4	0	0	42706.2
1419	453.345	21.828	3.03095e+07	2.26439e+07	1.81292e+07	444880	412793	1.55289e+07
1420	814.232	58.1565	111395	69960.5	34714.8	46966.8	18155.8	0
1421	542.427	53.1722	1.38477e+06	392476	453497	460645	456546	526697
1422	868.367	34.3681	44074.1	43405.6	1568.04	591.576	16495.6	4559.36
1423	630.195	54.0723	207990	66799.9	79107.9	77691.8	93644.8	98586.4
1424	433.104	24.4756	1679.21	18331	36941	57579.1	56605.7	70516.6
1425	1136.5	48.5777	1268.37	3694.2	15614.8	11812.8	3561.81	7817.64
1426	244.261	40.6526	67787.5	47318.4	55790.7	36752	38158.5	48187.4
1427	596.107	34.5267	0	658.013	26391.7	30642.6	22129.9	42342.6
1428	1446.42	28.2989	157170	170173	46220.6	26969.5	173467	64397.9
1429	408.218	45.1196	317039	216680	866586	535427	384611	201021
1430	449.214	45.1269	131394	168700	859177	718459	484257	306844
1431	498.213	31.6622	189583	131178	340799	180387	145715	79662.8
1432	900.797	53.6335	172000	17741	28730.8	17211.9	40625.1	18028.3
1433	242.925	62.7379	11512.5	24786.9	40541	51130.7	55012.7	50176.7
1434	434.227	45.8398	2.02145e+06	1.23117e+06	329307	269030	1.44189e+06	381114
1435	563.261	29.6319	285186	193420	25939.5	13160.5	41734.9	14405
1436	455.35	21.8239	1.3294e+06	932530	737875	22390.2	20818.4	626468
1437	497.425	54.414	320561	200732	211890	242840	191028	204070
1438	227.176	11.1323	2.52907e+06	2.23796e+06	1.43596e+06	30027	25537.6	1.18821e+06
1439	177.996	63.3881	97415.1	61565.7	64905.4	61529	59131.3	59720.5
1440	913.338	35.3316	405002	404138	20136.4	14521	1.30102e+06	156255
1441	985.26	37.4835	800014	686251	334899	182674	737905	512743
1442	228.179	11.1301	345472	308106	198434	9029.3	7729.57	159146
1443	902.474	47.7349	42295	17567.4	41226.5	28912.8	97043.7	11667.9
1444	385.902	63.5632	27385.7	32104.9	34252.9	39050.7	37205	40656.4
1445	296.136	10.4229	669580	708380	745689	438369	1.06568e+06	738008
1446	986.263	37.4835	421971	358927	173847	95289.2	390957	268624
1447	966.482	48.7186	77400.6	120294	1607.78	1253.18	64469.8	29493.2
1448	811.378	38.3209	56588.5	36182.6	0	452.178	16137.9	10442.6
1449	432.144	36.2351	6880.66	16419.2	138176	109877	10481.9	90869
1450	406.128	38.2873	97631.5	84702.5	138461	119897	175441	379446
1451	203.051	9.73501	29915.9	19324.1	144840	181073	65403.7	230740
1452	1482.7	48.9468	110825	86496.7	251.578	0	103701	42149.5
1453	1042.5	47.6976	371877	632847	456.369	0	248183	47405.3
1454	278.269	53.073	57402.8	31362.8	41566	54069.9	41330.7	54985.7
1455	337.133	35.0254	46402.1	43203.5	25250.8	23052.3	45949.7	38596.1
1456	149.956	1.97549	14923.8	14583.5	18483.7	15784.8	20060.5	19147.4
1457	268.191	26.387	2.78315e+06	1.85989e+06	256001	170545	1.03594e+06	203856
1458	808.342	35.2092	6904.14	6036.47	5331.31	5713.91	7335.34	8889.04
1459	342.27	53.8947	113835	83952.3	69710.6	79565.6	115288	146226
1460	768.356	36.2026	150642	149184	13507.4	0	160702	254252
1461	799.342	37.5777	38895.8	22882.3	0	235.709	1758.72	12098.7
1462	914.341	35.3278	207047	217865	9953.57	6538.74	675951	80361.2
1463	426.228	45.1196	1.07507e+06	723545	3.13366e+06	1.89447e+06	1.2784e+06	608445
1464	151.035	63.3992	1.32763e+06	1.04977e+06	1.1331e+06	1.23707e+06	1.19417e+06	1.28079e+06
1465	286.072	28.3001	343829	225296	80858.9	55388.3	148302	75622
1466	855.336	36.2639	39205.1	72564.7	120843	66557.2	36493.9	160951
1467	1290.51	38.3013	245768	204339	49446.1	18763.9	101699	76405.9
1468	1067.46	34.1645	0	0	54838.8	19541.5	15991.1	5558.8
1469	457.212	46.89	304157	220583	37648.3	38826.5	188426	81580.3
1470	832.327	37.3552	480870	317336	0	0	66333.4	34771.2
1471	877.369	31.0009	420520	349080	1212.21	2264.69	106381	14627.5
1472	777.32	36.6107	3503.47	182673	24393	10588.8	491386	303707
1473	1293.56	48.556	2951.28	6309.5	9381.52	7101.96	55808	24447.4
1474	879.387	30.9794	68019.8	64377.8	232.54	0	16371.4	3149.5
1475	947.309	33.1066	53464.8	64933.4	516.457	0	45192.4	22078.6
1476	812.362	35.428	383.573	823.407	504.335	533.302	1283.59	11174.2
1477	1159.6	48.5541	42029.9	65612.2	122441	96962	1.76267e+06	579460
1478	752.361	38.8313	115304	96790.1	1991.25	209.559	23467.1	25073.6
1479	340.261	29.1891	3.36497e+06	1.38985e+06	1.69115e+06	8613.91	11184.2	1.31797e+06
1480	1043.5	47.3801	153683	267577	437.67	0	107716	19640
1481	306.965	63.6723	59552.4	43755.2	36726.2	27027.7	22448.3	22803.7
1482	840.38	41.6156	2145.91	1143.67	51531.3	33379.4	95528.2	16108.4
1483	1065.46	34.1635	0	0	205575	66078.7	71160.6	20274.3
1484	391.183	28.5525	346147	280210	91877.2	65669	98866.2	200176
1485	679.513	29.1891	2.56427e+07	1.45374e+07	1.34119e+07	8560.45	6067.78	1.06983e+07
1486	1066.46	34.1635	0	0	138370	45028.6	47471.4	14587.1
1487	156.08	36.2696	26152.1	14038.2	17557.1	2372.88	9301.13	25319.5
1488	899.36	29.2581	391812	201935	0	197.369	45426.5	1167.46
1489	433.223	45.8391	8.1181e+06	4.75606e+06	1.22181e+06	1.00937e+06	5.7214e+06	1.42199e+06
1490	1160.6	48.5529	31732.7	50051.7	91842.3	73296.6	1.311e+06	431893
1491	1048.45	34.1635	0	0	45412.1	14456.9	9566.42	3692.76
1492	467.203	28.6273	214242	140893	32328.8	22125.2	55248.7	20574.6
1493	142.122	19.5999	453729	479906	127184	214104	157574	145771
1494	660.416	47.3285	32942.4	36050.1	5637.93	1526.75	3629.19	8731.2
1495	453.283	49.8432	197364	259459	1.07736e+06	852377	327273	401178
1496	253.179	31.4226	1.64509e+06	882554	107954	70641.3	680158	132229
1497	877.33	37.9503	45124.2	0	688.365	0	19735.2	55580.1
1498	561.165	48.1123	68111.1	50881.7	36485.4	35483.5	18656	33971.5
1499	1085.48	34.1635	0	0	132262	43559.3	44726	13016.7
1500	603.127	38.4504	0	585.212	25437.6	39050.8	11112.7	9258.48
1501	855.582	53.6612	246746	177645	232655	208051	75660.2	29001.4
1502	1084.47	34.1635	0	0	342836	108677	119614	32065.6
1503	482.406	54.0727	2.45541e+06	1.37892e+06	1.66678e+06	1.68527e+06	1.40658e+06	1.58635e+06
1504	785.322	38.2808	223394	195322	218619	138971	437961	839436
1505	680.516	29.1889	1.04981e+07	5.69226e+06	5.25228e+06	2996.35	2699.94	4.16684e+06
1506	483.409	54.0732	698890	391462	471512	473568	392330	463509
1507	1083.47	34.1635	0	0	525979	157919	176199	45888.3
1508	254.032	63.4256	8676.81	7708.1	9973.79	12350.9	15603.4	16010.8
1509	927.485	48.168	36946.9	14173.6	75832.9	46103	44136.8	267890
1510	427.232	45.1232	320081	574062	850541	541264	362785	179038
1511	228.553	22.935	0	0	884.982	1691.34	5431.33	4466.97
1512	863.457	50.0655	15151.4	18780.5	16433.7	10600	12758.7	13337.9
1513	416.216	45.8363	170414	107306	47662.9	26950.6	119821	37293.8
1514	863.349	37.246	403717	324734	44146.3	0	416722	267666
1515	698.342	32.2484	34239.6	30694.8	206.587	207.753	21765.4	6103.61
1516	868.332	37.71	175272	135414	5491.7	3902.66	138944	105117
1517	681.519	29.1889	2.23329e+06	1.26404e+06	1.15486e+06	430.518	738.001	934218
1518	442.361	51.8135	85030.2	44035.3	50857	50474.6	55011.6	67156
1519	452.396	54.4216	586327	463553	478351	533686	399836	420879
1520	519.197	49.5786	128418	447148	33876.3	25065.7	40216.4	31370.8
1521	864.352	37.2352	213165	172648	267.388	0	224281	151503
1522	401.187	35.532	0	5396.22	0	1384.75	13253	38089.3
1523	341.151	40.8205	59362.1	220525	45779.4	54847.9	43806.4	69017.6
1524	1161.6	48.5529	14043.5	23282.7	41516.4	31738.8	538277	181119
1525	996.457	44.3911	97297.6	121295	0	0	47825	14514.8
1526	93.0701	29.4453	158388	98477.4	32287.2	20314.9	63347.8	31415.7
1527	340.192	38.8797	13273.9	11273.9	13677.4	20616.7	15699.8	48356.2
1528	186.088	21.2304	21909.6	27748.5	21943.6	19776.2	17600.6	49926.8
1529	568.193	54.2658	524053	209964	230995	236200	269757	289018
1530	226.555	37.4769	0	0	4253.82	4215.6	15180	17393.2
1531	338.14	34.0011	84896.1	71134.5	67989.8	46776.8	65426.4	235322
1532	1162.61	48.5507	5336.54	9229.2	13518.5	9931.85	171349	59168.7
1533	159.116	33.3612	437782	238795	88975.8	66333	228765	68506.8
1534	599.402	27.0434	177206	111921	77919	0	0	49246.9
1535	1017.93	47.6883	50964.7	14377.8	22834.6	24359.7	11691.5	29370.4
1536	816.368	36.662	199092	116569	0	220.951	46129.6	20484.7
1537	543.243	34.1642	198716	287568	5.62335e+06	3.34022e+06	2.934e+06	1.71767e+06
1538	848.367	35.5131	26805	70030.1	10788.5	954.31	82333.1	85736.3
1539	815.365	36.6702	881601	510113	296.199	226.972	197160	89897.7
1540	310.913	62.7746	31586.9	30672.2	47441.4	50764.8	51005	28193.8
1541	334.093	28.3004	5.01463e+06	3.03234e+06	1.09025e+06	713338	1.97366e+06	988796
1542	148.039	13.4427	23322.5	13741	68232.6	50345.6	25276.9	25694.7
1543	861.324	37.7153	241636	165419	6784.57	2570.01	154276	118491
1544	939.46	47.6907	4.03117e+07	3.82003e+07	2.35894e+07	1.83902e+07	3.61981e+07	2.64928e+07
1545	908.466	50.9548	107356	82526.4	151151	82555	71245.9	112574
1546	334.272	47.3237	14821.3	63936	10434.3	9251.49	8832.42	7897.1
1547	154.076	6.69369	32975.9	23225.2	83616.5	93741.2	19318.2	35920.6
1548	517.202	49.5872	265472	1.20622e+06	67456.3	54543.6	95507	71105.2
1549	305.269	53.1217	128106	48896.1	68327.9	86720.8	70857	99612.5
1550	881.355	28.4843	888565	552845	110245	61482.4	291133	106071
1551	454.304	49.2446	171988	142770	294834	293692	189205	168892
1552	608.347	41.4111	3873.43	31372.5	19333.1	11990.3	10743.3	28802.1
1553	414.156	28.3038	1.01639e+06	646934	220662	139981	424624	203320
1554	506.286	37.7647	192217	120940	216907	147431	114206	31647.8
1555	401.198	45.8403	1.57431e+06	945355	265817	220930	1.11823e+06	310260
1556	467.236	51.0178	184503	128420	261800	178105	120907	186079
1557	408.369	54.43	335149	296424	297458	360293	264468	268625
1558	312.218	22.2412	536554	249427	73075.9	45979	152812	59462.2
1559	1110.31	62.9885	90176.1	82547.1	57419.8	48444.8	54724.1	18767.7
1560	260.171	43.4975	1.55976e+06	1.368e+06	815303	747867	1.44235e+06	1.14008e+06
1561	831.323	37.3302	961263	609063	0	0	128334	69935.7
1562	770.85	62.5042	159658	133272	172169	171536	164405	138212
1563	337.252	54.1709	377453	323029	376422	392588	331274	363915
1564	498.901	62.5076	445041	358633	410343	406153	381822	324752
1565	91.0543	45.8517	130214	80727.4	23353.4	19871.2	81189.9	29687.6
1566	682.521	29.189	395150	231980	217309	0	0	175570
1567	549.291	41.5064	785318	461091	582072	550364	376393	468588
1568	453.399	54.4162	168663	134005	137216	150127	108811	115706
1569	642.166	34.1626	910.496	1615.58	13774.6	19891.5	15118.1	23568.1
1570	249.185	48.4971	27498.5	24572.6	122149	112991	31304.1	67305.1
1571	518.201	49.5945	79209.6	350767	23180.3	16986.2	27938.5	22879
1572	373.2	45.8963	54296	47109.3	51529.6	48048.2	129571	64105.4
1573	874.328	35.3232	759.62	576.371	2292.85	4254.68	68486.4	26293.8
1574	601.357	50.0724	79757.1	52323.1	30739	22043.4	106618	34917.9
1575	544.245	34.1635	48968.8	67078.5	1.1353e+06	686251	614573	367905
1576	874.434	45.1158	4830.02	8588.1	104022	41780.7	33265.8	6105.16
1577	288.087	28.3022	1.28498e+06	830274	284429	186262	552509	270094
1578	875.441	45.0855	6195.19	9599.64	69022.3	31495.8	21468.3	6805.91
1579	982.317	37.7085	68204.3	49332.7	4295.08	2697.78	68370.9	69523.5
1580	911.395	39.2414	260540	202996	81719.2	564.471	340617	141219
1581	242.118	30.8895	283930	243105	33206.1	29066.9	55827.4	33805.7
1582	396.193	29.2945	4.13883e+06	3.36198e+06	383426	420226	798065	843767
1583	319.091	28.2982	793347	499524	173261	114119	325125	166280
1584	624.443	53.9811	157624	115401	155910	146634	130886	153140
1585	1044.5	47.3833	52752.8	95967.7	571.96	451.982	39830.7	9736.16
1586	1055.54	48.5984	23421.4	31162	975.545	210.772	82552.7	30141.4
1587	519.331	53.8982	342983	275088	319440	333731	57659.4	78539.3
1588	280.119	25.8209	1.94619e+06	2.32724e+06	419349	230134	474770	469963
1589	391.163	36.2284	46784.5	28560.6	56588.9	51588.1	30096.9	79122.5
1590	149.096	37.89	257855	165828	87981.3	65604.4	129733	74972.7
1591	542.24	34.1642	586543	849619	1.83002e+07	1.09522e+07	9.6366e+06	5.49155e+06
1592	453.349	44.6863	30280	609970	10937.9	252159	294589	13397.9
1593	915.358	35.5131	162734	189152	76637.3	29897.6	277246	140340
1594	332.149	31.9061	266497	220926	84286.2	54253.6	47586.6	51190.1
1595	543.431	53.1674	431454	119521	152442	152231	140254	174093
1596	499.232	43.7257	969226	699654	258651	212625	402330	209096
1597	359.234	54.1709	165054	159502	216337	245476	239628	301784
1598	236.192	43.4804	2.09139e+06	1.45029e+06	925223	670608	1.05243e+06	1.11494e+06
1599	292.276	41.6362	88841.5	62148.6	57056	8645.92	12777.4	53737.5
1600	951.331	28.0643	24987.6	36821.3	426.738	538.148	4783.43	14299.2
1601	510.25	46.4207	125442	115206	1.02324e+06	953933	169926	305094
1602	404.112	37.4598	33736.2	7783.89	11582	10493.5	17470.1	16462.8
1603	105.034	28.3022	4.51707e+06	2.84365e+06	965903	627438	1.82257e+06	913673
1604	299.075	28.3017	797317	500595	176661	113490	335287	168990
1605	106.037	28.2984	332395	210628	77705.9	48668.8	135926	74332.9
1606	401.143	28.2909	518497	328592	110769	71376.2	218321	101426
1607	245.186	11.0323	26753.4	70468.3	19387	17205.7	27381.3	53537.6
1608	165.573	34.1658	0	3131.92	1761.45	2604.42	29661.3	12374.4
1609	426.343	50.0369	452576	122280	178417	151734	126055	156493
1610	329.198	19.7539	698850	348912	171068	105115	146382	139741
1611	529.415	51.8964	516916	173182	214300	227099	158686	188210
1612	382.13	28.3017	5.11726e+06	3.17698e+06	1.0864e+06	711404	2.06e+06	1.02175e+06
1613	873.43	45.1148	6383.99	12622.8	186054	73075	55355.7	11938.1
1614	645.427	52.7646	9160.57	50012.6	5462.75	6182.01	17328.7	8022.93
1615	397.196	29.2969	1.03852e+06	854151	100101	145566	229403	221502
1616	659.168	19.7475	7367.27	43472.7	0	0	64144.1	46433.1
1617	464.374	55.1466	22885.1	28894.9	23231.3	28010.1	107307	117731
1618	928.489	48.1893	8834.18	6827.06	35940.5	21384.2	20602.3	148459
1619	200.152	37.8104	114510	73527	12904.5	9800.64	39794.4	1681.13
1620	831.401	35.5515	0	19978	0	0	48445.8	46131.7
1621	402.201	45.84	406936	254783	69479.5	59211.9	292771	79905.6
1622	739.212	57.3386	90651.3	43829	14390.8	25425.3	0	0
1623	808.436	49.0472	2890.85	3399.55	52049.4	43606.4	4425.26	13077.1
1624	318.088	28.3071	6.87927e+06	4.21312e+06	1.39547e+06	903607	2.7262e+06	1.30208e+06
1625	576.318	47.6869	104263	69360.5	52345.4	48034.2	64307	60858.7
1626	548.288	41.5052	2.19937e+06	1.24828e+06	1.68017e+06	1.54288e+06	1.06334e+06	1.277e+06
1627	206.162	29.1847	295903	202359	64954.4	32605.7	99959.3	31256.6
1628	717.231	54.9474	193602	85302	79125.8	84443.5	73637.6	72559.8
1629	867.323	37.7077	329342	257121	27225	13069.1	257904	206401
1630	383.133	28.2994	1.16355e+06	734244	256632	172408	489551	244132
1631	370.127	32.84	519124	278652	62587.1	37696.8	113851	114454
1632	659.413	47.3244	88080.5	81114.9	5465.12	2805.51	6156.98	18912.1
1633	483.287	51.6272	3.53369e+06	1.19386e+06	512940	367576	689198	414792
1634	640.336	36.2978	26452	3566.18	11562.6	2163.04	24741.6	118444
1635	399.215	49.0294	15534.8	14777.7	147123	185601	104344	180598
1636	361.203	47.3036	148611	111649	21614.6	41825.3	60080.8	40132.6
1637	349.112	29.6222	1.58953e+06	1.11242e+06	174698	97923.1	280889	99619
1638	348.109	29.623	8.99352e+06	6.06271e+06	881562	466648	1.46391e+06	513341
1639	350.114	29.6222	270432	194150	29439.6	16565	47093	16187.4
1640	292.191	21.4469	628533	370210	12176.7	12304.4	221642	37927.8
1641	495.216	49.5985	345224	2.57383e+06	92810.2	80297.3	161833	123037
1642	221.187	43.6201	224759	153881	191168	137393	110550	117971
1643	580.417	53.9944	184550	141763	181412	185098	155591	179722
1644	432.216	48.5938	88628.5	196494	2.10005e+06	2.20198e+06	320455	698493
1645	521.289	51.5191	298329	330655	235222	167919	339743	300219
1646	449.192	29.6237	1.14022e+06	719294	90803.7	50101.2	159147	53135.5
1647	189.164	50.9502	29063.6	30771	50372.8	38193	28189	41933.6
1648	817.378	35.5467	89473.1	103198	26014	847.569	92266.9	100747
1649	496.219	49.5945	109282	731168	44447.5	28881.4	48425.5	37509.5
1650	818.38	35.548	29280.1	42147.7	0	200.133	54610.2	50425.2
1651	779.356	38.3046	214210	150525	0	0	81248.7	52732.2
1652	202.048	9.73291	15899.2	14497.3	1.27783e+06	1.71592e+06	572195	2.21802e+06
1653	498.389	53.1571	1.389e+06	403511	509628	487538	406072	518566
1654	194.045	28.3063	5.06524e+06	3.21875e+06	1.09781e+06	719387	2.07982e+06	1.04354e+06
1655	298.072	28.3046	4.51934e+06	2.85308e+06	961717	614043	1.86065e+06	918069
1656	139.075	51.3009	53456.5	39331	61651.1	61023	116604	77660.7
1657	824.384	44.5646	4593	6906.57	138251	102018	49249	35040.8
1658	301.286	41.994	141353	72669.5	80287.2	113211	47425.3	71448.7
1659	156.037	28.3017	335638	209741	74454.9	50015.7	138182	71228.8
1660	865.328	27.1015	149143	129405	337.087	0	20846.9	6449.66
1661	948.279	28.2971	9956.63	2444.75	0	0	41159.8	22534.4
1662	438.38	54.0732	1.35791e+06	851842	1.02522e+06	1.02916e+06	847346	977697
1663	259.168	43.4975	9.99156e+06	8.77362e+06	5.13043e+06	4.66652e+06	9.24808e+06	7.11242e+06
1664	538.323	50.6937	129372	110891	47946	46478	129290	121830
1665	729.387	36.2639	33142.9	5118.28	36291.4	12946.5	7166.31	84828.4
1666	174.945	2.1597	34600.8	52747	18107.7	30700.9	19134.1	36248.2
1667	531.259	42.3861	892717	644561	835896	1.11294e+06	830238	1.4177e+06
1668	674.705	28.2978	0	0	0	0	28352.7	0
1669	174.035	2.75141	12723.5	10942.7	14614.9	15048.7	27656.4	26611.9
1670	103.006	63.4017	5341.86	4108.53	4878.24	6243.38	7612.38	10121.5
1671	333.205	44.8942	841626	597527	174909	176680	441061	70598.1
1672	921.27	28.2978	253215	125600	0	0	97453.4	28655.5
1673	276.166	31.1855	264228	219190	102164	78217.1	288251	98755
1674	419.18	35.5619	61655.8	45489.1	4813.09	4432.44	2435.97	9077.27
1675	499.232	42.4271	252939	211791	35687.5	33051.1	250617	45261
1676	814.363	36.6712	3.26436e+06	1.77952e+06	2126.42	0	687460	291543
1677	195.048	28.3022	505363	320274	112705	76256	210284	106040
1678	761.322	36.2258	222064	199713	43711.2	26961.5	312716	109193
1679	777.234	54.5366	182658	67943.3	64829.2	60980.1	55947.3	58752.8
1680	234.067	63.4543	112479	110385	118222	140952	156474	196783
1681	778.232	54.5266	152663	56166.6	50263	46393.6	44863.2	40435.2
1682	433.219	48.5942	26551.5	64542.4	583640	606687	93330.4	204356
1683	438.286	47.7134	98506.9	67537.1	43188.6	39240.9	234978	56082.9
1684	240.082	62.5075	40081.4	28160.9	47554.9	40139.4	35244.9	27148.8
1685	868.46	47.6581	16950.8	12727.6	21003	39713.6	13765.2	28415.9
1686	1095.57	41.5114	156730	114604	141106	146622	106506	117465
1687	802.352	41.3613	47716.6	47072.1	2687.95	712.845	50326.9	13171
1688	349.112	28.3004	3.68406e+06	2.22138e+06	728513	465263	1.4486e+06	663068
1689	374.185	36.2612	7.1474e+06	7.4373e+06	9.05268e+06	6.64762e+06	4.51147e+06	1.26379e+07
1690	358.202	40.6749	874614	464870	100506	67525.8	248937	104252
1691	419.092	20.9528	14766.1	32677	26878.6	29120.4	59462.4	40144.1
1692	619.419	57.0446	120089	116830	144353	153420	143165	168633
1693	841.441	49.0649	1896.04	2513.71	415515	165563	4451.73	9873.34
1694	946.49	50.0979	23729.6	39633.5	22870.3	14186.2	16651.4	14994.5
1695	833.333	37.4514	194347	141578	5018.83	2231.74	43675.1	37531.5
1696	786.327	38.2799	157988	138727	114523	72358.5	226629	424545
1697	860.332	37.4264	0	0	41092.7	26017.9	117365	28638.8
1698	348.109	28.303	2.06597e+07	1.23561e+07	3.93824e+06	2.48069e+06	7.96131e+06	3.56816e+06
1699	514.106	37.4517	604884	391820	88841.4	41155.8	137081	98184.5
1700	244.097	28.3017	712038	453847	170564	111620	304132	156950
1701	311.254	53.8782	242218	98277.5	123987	131362	176700	197792
1702	348.109	22.9243	2.65528e+06	2.00914e+06	332543	195103	601750	297440
1703	656.367	36.2076	294143	400457	107317	87002.4	156092	121553
1704	452.256	35.5313	591533	273899	260839	172417	97300.9	147634
1705	499.403	53.1494	417803	119573	148378	142069	118023	149452
1706	191.179	49.0792	3987.79	2533.77	49266.2	30766.9	2412.84	6928.96
1707	308.186	36.8139	648520	279147	26737	28861.6	9181.88	9618.66
1708	343.146	40.8283	6663.75	76661.7	5189.25	16466.7	12775.3	20917.5
1709	865.392	43.2071	44000.1	106381	89811.3	68283.5	99568	72708.4
1710	331.268	48.3322	426268	292786	148081	134584	123047	117076
1711	365.273	53.6824	113031	43606.5	48398.8	50415	82533.3	98466.2
1712	496.16	31.633	1.84262e+06	1.07035e+06	135678	125714	177573	61825.2
1713	508.338	54.1784	3.18238e+06	2.71553e+06	257598	289389	294733	371276
1714	215.935	63.5334	24110.8	19505.3	26560.7	28651.4	30831.6	34456.2
1715	307.189	36.8128	37764.3	22959.2	134563	139653	26752.9	30654.5
1716	397.148	36.2193	1.43086e+06	887162	78115.5	52732.7	362669	65301.4
1717	440.359	51.8115	1.62962e+06	756970	990121	977590	370501	453597
1718	415.213	45.8385	611147	391938	163484	87843.1	447487	127653
1719	400.14	28.2988	2.16939e+06	1.35464e+06	447178	289210	871811	419856
1720	1218.59	48.938	204994	97271.6	213.202	0	65168.4	24959.7
1721	945.303	33.1074	339527	352880	3867.71	1255.74	255189	117483
1722	373.23	51.2961	41834.9	33422.6	42747.4	40175.2	70811.8	52984.9
1723	528.412	51.8932	1.67499e+06	576624	717476	737394	503417	610326
1724	200.032	17.9415	55949	32292.4	6620.51	4914.89	35657.9	15855.8
1725	358.203	46.5397	227162	118427	36390.4	26856.7	91915.8	35756.3
1726	258.076	28.2992	296644	197245	69329.7	45944.5	132541	68705.9
1727	452.125	36.2512	63374.3	74548.3	70885.6	74851.4	99557	177648
1728	364.022	63.4654	15479.2	7917.21	10235.8	13793.2	17788.3	21831
1729	277.178	39.5697	3.73285e+06	2.88615e+06	1.10857e+06	878298	2.47191e+06	1.17804e+06
1730	733.371	28.4977	57407.9	52968.8	0	638.289	2249.26	8721.06
1731	545.248	34.1635	4192.04	8610.04	205927	127403	118692	69943.9
1732	537.285	48.5454	119407	145914	71296.5	62197.8	102052	79175.4
1733	954.275	42.001	3385.98	5644.27	5336.67	4739.47	66162.7	54855.2
1734	257.07	28.3021	297564	195782	75601.1	46416.1	131351	70011
1735	695.281	50.6914	181745	126666	9255.12	10354.6	35618.9	17942.8
1736	483.25	45.0334	1.37644e+06	948781	549418	315292	283484	431029
1737	736.187	19.7475	0	30541.8	0	0	61655.5	46519.1
1738	152.036	63.4035	239605	190551	209775	223959	223307	233814
1739	745.388	45.4663	72152.1	97398.2	12133.5	3012.54	44638.9	11182.3
1740	877.461	44.9856	5018.65	6776.83	22794.6	12493.6	5800.96	2320.9
1741	690.318	37.5002	84932.9	54241.9	76719.4	25414.9	30241	33463.4
1742	218.042	7.40597	40577	39740.6	1576.51	1165.31	94222.6	146762
1743	480.122	38.2833	2450.97	0	44485.4	49655.4	111927	122482
1744	434.222	48.5893	3768.33	14152.7	100697	108639	19457.6	37834.1
1745	315.125	44.2698	7092.49	36392.7	94935.7	77947.1	43761.1	15346.8
1746	381.106	9.73867	13659.7	17695.7	151264	215266	51984.6	299868
1747	519.23	42.7694	117522	88827.1	8855.94	5221.27	79438	33217
1748	614.312	45.6548	8282.41	7268.26	17937.9	25962.6	19603.1	29737.8
1749	488.872	62.4999	156969	90564	94155.1	83391.1	83898.1	48144.1
1750	658.171	19.7467	5188.23	29491	0	0	48164.3	33807.5
1751	408.143	33.6957	108563	92961.9	50849.9	36449.7	114740	140336
1752	107.049	6.69956	14899.7	8823.95	207462	228294	23830.1	82824.8
1753	255.066	28.3021	215478	135604	39392.5	22571.1	88674	41960.4
1754	826.34	33.0512	71751	62024.3	3497.38	1135.43	26507.3	8553.25
1755	813.36	36.672	6.68822e+06	3.54536e+06	6008.45	1042.38	1.35372e+06	559783
1756	325.228	27.5775	22851.1	118279	343151	164345	717469	546419
1757	900.331	19.6493	0	56446.3	0	0	29510	0
1758	309.234	24.732	96134.3	35361.9	281100	85985.2	622247	568123
1759	1177.51	41.5186	3065.98	10505.8	18679.1	13592.1	16869.3	23509.1
1760	548.228	39.1104	0	1568.11	80516.6	55828.7	26530.7	25493.5
1761	375.188	36.2612	1.82113e+06	1.81127e+06	2.04364e+06	1.5113e+06	1.06093e+06	2.83999e+06
1762	887.312	28.3039	1.96255e+07	1.40837e+07	6.17885e+06	4.26591e+06	1.20583e+07	6.81941e+06
1763	886.313	28.3039	5.0737e+07	4.27388e+07	2.1538e+07	1.51352e+07	3.85433e+07	2.37343e+07
1764	378.9	62.7223	0	5789.39	16714.2	20934.5	26911.9	14548.5
1765	329.257	46.7426	109197	166356	82712.2	96936.6	40330.3	60370.4
1766	660.5	54.0996	258829	180193	193712	184563	108529	117105
1767	1042.8	62.5122	43947.6	29920.9	48338	50054.1	41610.5	35017
1768	415.262	47.2116	58035.8	57561.5	129353	64995.1	45501.7	95028.6
1769	273.077	28.2886	7.07375e+06	4.49507e+06	1.46828e+06	984209	3.00363e+06	1.43176e+06
1770	349.295	53.106	217371	77498	88937.3	92361	72945.2	86423.5
1771	440.266	35.532	567355	243121	211719	158570	106696	150662
1772	754.226	54.3099	66782.1	26160.1	20479	25279.6	19297.4	18892.7
1773	634.308	36.5317	0	418.058	15564.5	19070.7	60295.3	17954.4
1774	923.528	51.4071	71273.2	81607	84048.6	66767.9	128720	104505
1775	424.213	43.1165	177597	94295.3	590937	266999	110000	80203.6
1776	372.144	29.6397	197655	117786	13950.2	10574.5	28664.1	14720
1777	605.142	37.2843	2293.29	8921.48	78685.6	90688	69621.4	74477.6
1778	448.184	40.5954	103647	60475.3	19906.5	11131.4	112470	65987.4
1779	668.469	53.9679	115841	81944.2	105468	109952	86277	96324.3
1780	1273.5	37.7153	213517	144678	3679.94	0	158807	111803
1781	906.824	62.4955	99871.4	75741.8	105534	104751	100723	113737
1782	366.322	53.109	633301	215123	263002	268782	196694	242544
1783	242.082	28.2966	160567	106362	20137.3	6907.5	56497.3	17111.2
1784	398.254	22.2451	343007	269447	72687.3	46533.4	165171	59057.7
1785	475.245	53.041	67610.8	57734.4	59906.6	72492.3	47936	62984.9
1786	753.226	54.3088	87835.1	45709.8	33470.2	37947.6	36736.6	28706.5
1787	566.888	62.5074	358288	284192	322747	330039	307067	274151
1788	964.459	46.4586	22927.9	26147.7	4025.94	523.648	23550.9	11969.9
1789	274.081	28.2909	1.1372e+06	728521	249029	165394	485096	245910
1790	569.571	53.599	207562	51204.1	57914	31221.7	64775.3	70915.4
1791	537.32	50.6937	359027	295573	122175	122583	370223	339390
1792	1042.48	44.3947	298.915	1841.34	47708.8	42235.6	27425.5	13879.7
1793	505.353	37.7435	553987	351251	58557.5	62785.9	328051	32559.2
1794	392.223	49.0809	28825.7	26071.1	448646	260448	35101.1	68545.7
1795	149.023	49.874	1.3771e+06	492720	577200	548527	374945	472909
1796	328.256	53.1054	119816	64797.8	76268	66520.5	60788.1	66167.4
1797	431.22	50.4566	6990.73	10197.4	148100	99183.7	42530.8	35648.1
1798	337.213	23.176	1.02938e+06	562303	55335.6	39084.7	171620	36353.4
1799	417.228	49.8199	126626	90925.6	180353	147565	203009	124023
1800	522.292	51.5193	105101	120383	85875.5	60686.6	111899	105852
1801	751.354	36.1474	24967.9	13729.3	592.758	501.544	33240.4	5315.56
1802	967.28	37.3792	71244.5	51888.6	0	580.49	14123.3	2715.04
1803	167.106	30.6173	256247	190954	54113.4	39633.7	111974	60752
1804	842.444	49.0691	4477.87	3698.24	233295	95197.1	3666.48	8018.53
1805	776.233	54.5439	241501	98057.3	87807.9	91932.9	81296.1	85477.7
1806	820.307	35.2423	41906.4	73121	0	0	18504.7	1326.33
1807	325.119	36.8875	300944	125598	51452	51159.5	43810.1	122982
1808	1272.49	37.71	268949	180376	4401.89	504.027	201288	142445
1809	245.082	28.3022	618143	416334	151582	98103.8	291421	138686
1810	105.07	43.5005	168798	125627	55645.2	40634.2	88524.1	62084.5
1811	907.463	50.9539	172194	133567	240187	136939	108722	189438
1812	191.179	39.5588	149236	90084.1	29160.9	22090.7	63342.1	24561.9
1813	838.837	62.4986	126548	103903	134325	140485	128742	110213
1814	279.16	49.874	4.12157e+06	1.38029e+06	1.66279e+06	1.62682e+06	1.06009e+06	1.3449e+06
1815	275.082	28.3001	160973	95741.6	24445.9	3063.44	55420.6	17097.1
1816	814.378	34.1635	17067.3	38159.8	234624	128100	230639	91754.9
1817	390.16	36.2418	186158	151615	232354	196839	111362	318400
1818	405.288	54.1709	537016	495065	387632	436260	336662	337544
1819	716.23	54.9428	278870	122563	116763	128272	107726	115630
1820	1098.39	29.1877	233273	210186	265581	279.807	279.039	382399
1821	793.318	36.2696	0	2429.5	19950	1181.09	37398.3	62773.2
1822	803.321	36.2077	0	0	0	0	27381.5	22036
1823	791.249	55.3709	119668	40425.2	31286.3	30596.4	32511.4	34722.2
1824	222.112	39.9906	196873	94849.6	38376.9	30226.5	42803	39714.7
1825	754.34	36.8652	53323.1	57586.7	481.991	534.299	10682.2	5335.06
1826	888.314	28.3039	4.27004e+06	3.16061e+06	1.4174e+06	1.01182e+06	2.72809e+06	1.58651e+06
1827	879.808	63.4225	28067.9	20064.8	7861.37	17406.4	21186.5	203575
1828	323.13	42.0025	168307	21479.5	17678.1	15122.5	26228.3	38024.4
1829	328.176	22.848	252819	152668	19074.9	11223	50133.4	14477.4
1830	83.0496	39.3704	221159	132837	41165.5	29623.3	97180.8	32436.4
1831	280.163	49.874	690113	247028	297895	297429	192025	241052
1832	312.218	20.9122	624209	294549	70615	39857.2	184667	43860.9
1833	753.319	39.5381	42590.6	41767.5	7815.78	12389.1	81328.3	37794.3
1834	718.229	54.94	151022	62744.7	61945.7	64825.2	51046.7	57047.4
1835	401.329	54.0524	83929.9	92396.5	101961	92112.5	88800.8	91331.6
1836	407.195	39.1446	293607	189720	34280.8	37295.4	93672.2	97727.9
1837	191.179	43.502	188985	135366	56355.5	39125.5	99562.2	59821.1
1838	581.346	41.3862	5296.69	16555.6	25728.2	23230.7	49369.4	69058
1839	196.061	7.40079	182829	171929	14737.9	14914.3	64719.8	80228
1840	483.141	35.527	809043	350751	0	2463.7	24465	51457.3
1841	497.216	40.923	910198	556843	111162	171008	379846	176883
1842	961.434	47.6788	660283	423565	540899	499102	317179	519137
1843	518.227	42.7795	354562	250311	13896.8	7551.08	237685	98900.6
1844	159.116	37.8612	462705	291944	127225	98439.3	212643	107214
1845	969.269	34.5026	2577.85	7217.78	51110.8	39559.8	82808.9	63181.1
1846	210.022	63.3839	196827	137772	132346	129029	128680	134938
1847	448.379	53.6494	52691.5	22395.8	33610.8	37710.7	65782.9	103857
1848	783.577	55.1593	192140	104903	134683	151924	469816	626934
1849	243.098	6.43652	100095	100446	28882.6	20113.8	60129.6	39270.1
1850	240.968	63.4618	19300.1	16269.6	19337.4	20376.4	16744.3	19285.2
1851	484.254	45.0382	422525	292839	205521	116528	93020.1	135104
1852	202.05	48.5942	7288.27	9195.56	75280.1	50506.9	9299.05	15033.4
1853	565.314	41.503	258495	137051	175843	166234	117512	127188
1854	411.218	50.9592	345357	334690	670156	503593	359112	534133
1855	837.423	29.1877	124618	116030	146828	0	500961	167119
1856	951.454	50.0884	66571.3	103729	7178.64	2849.04	29429.2	38504.9
1857	159.116	39.5009	355399	172305	215792	144048	130501	114268
1858	570.22	48.938	101582	99928.6	29288.5	15170.7	155702	181609
1859	823.381	44.5407	6285.24	7973.07	257953	188376	87266.8	59233
1860	330.146	28.2911	563587	6.50563e+06	13722	451.608	34943.8	0
1861	1097.38	29.1889	447531	426322	536777	0	222.885	773050
1862	825.334	33.0508	135355	112454	514.833	779.254	50870.1	19471.5
1863	454.375	53.1343	1.21568e+06	354059	434443	429690	315122	384779
1864	1099.39	29.189	78565.4	69330.5	87790.9	0	0	128571
1865	445.255	51.0061	201775	168654	373574	301320	187577	285575
1866	716.353	37.8536	842556	536722	139244	76481.6	1.00557e+06	1.05423e+06
1867	515.374	54.0245	209855	191130	208450	205523	119175	281284
1868	407.145	27.5251	389616	255022	17346.9	11698.7	31251.4	14971
1869	981.313	37.71	149665	112252	21391.4	20148.8	142602	135668
1870	420.143	40.5693	115502	90073.3	187521	161489	220684	309372
1871	220.178	43.5005	1.55994e+06	1.08589e+06	416981	320058	796369	466966
1872	570.09	22.9339	287216	142611	22393.9	19159.2	45115.5	27167.8
1873	266.103	20.7759	932924	497331	17754.5	13612.5	9951.47	15236.5
1874	946.306	33.1074	183004	187266	1727.88	440.083	138731	64722.6
1875	156.567	34.1762	0	11354.7	0	3761.56	47659	16850.3
1876	801.393	35.5486	62198.6	97105.9	56846.8	32916.3	120405	198188
1877	481.807	53.6708	32587.4	44906.4	68561.4	84094.9	621.435	0
1878	95.0857	43.495	116214	80932.1	38842.5	27775.1	61359.6	43058.2
1879	784.58	55.1578	99062.2	52806.4	69909.7	79590.9	238335	320014
1880	432.166	28.2992	1.36985e+06	800356	297330	191168	526083	242404
1881	674.377	35.7922	47069	48490.3	6031.56	4133.73	120967	72170.1
1882	119.085	43.4964	211090	156768	77791.1	55825.5	113085	84841.2
1883	372.226	51.297	165605	128575	219998	198293	449280	306071
1884	702.863	62.501	220513	172200	220479	221460	201640	173997
1885	203.173	43.499	235956	169296	270443	181727	123487	178880
1886	628.381	48.556	26517.7	18878.9	17460.1	16466.2	49525.7	30862.3
1887	302.27	42.4485	267964	102548	165758	96176.4	93351.6	141711
1888	231.251	41.2974	254854	94686.2	171261	71682.8	89132.5	153717
1889	252.168	34.1519	1.66248e+06	1.12826e+06	275699	164528	733424	233504
1890	470.167	38.2758	38185.6	36782.9	92630	81950.6	105933	144406
1891	385.139	37.5	476100	286203	76452.8	45515.6	204270	88170
1892	152.071	6.69213	102631	80447.8	9.99435e+06	1.13869e+07	928351	3.90705e+06
1893	476.133	31.8427	166727	115800	47295.8	27901.6	41666.8	35648.7
1894	845.349	37.7092	3.07304e+07	2.02089e+07	478385	157104	1.83933e+07	1.35605e+07
1895	202.167	39.9482	952617	629840	249922	187996	426079	264730
1896	93.07	43.495	110666	76991.3	33940.5	21807.9	52298.7	38791.8
1897	225.125	54.1703	121728	90663.5	110160	112460	94264	100864
1898	966.914	47.6955	5084.32	0	12257.8	17521	43091.3	37493.2
1899	717.356	37.8536	377040	231636	63317.7	40656.5	441762	464679
1900	176.071	21.4227	141767	125907	59922	45549.2	165079	115093
1901	348.109	27.0744	2.97911e+06	2.28807e+06	295247	155933	451366	149038
1902	453.847	33.4893	626713	264742	264346	1979.25	905.536	188717
1903	227.071	28.3013	215015	151411	50110.9	36961.6	103595	53782.3
1904	149.096	32.5374	717603	434849	125759	83441	316312	102157
1905	568.568	53.5972	525058	115195	149184	79100.6	150496	164731
1906	908.248	37.4956	324928	218574	53040.5	17558.7	147167	71969.4
1907	1448.43	28.2865	51614	53098.7	0	0	57193.6	7901.41
1908	355.138	37.4844	179411	116186	30485.8	16061.2	80712.6	28069.4
1909	276.166	37.7771	418412	346281	106554	71048.4	186779	43483.1
1910	201.164	39.9514	5.81295e+06	3.77404e+06	1.49684e+06	1.09071e+06	2.55121e+06	1.57156e+06
1911	400.141	37.4871	1.05296e+06	619243	160387	86465.5	446608	178219
1912	670.949	53.9571	23581	14544.6	20957.5	22699.3	22425.3	30793.7
1913	284.296	54.2333	226765	207234	224376	244117	209287	218090
1914	153.074	6.68781	29174.3	17263.8	890941	1.00702e+06	91421.5	345941
1915	491.239	28.3017	127609	101375	58599.9	44494	88219.1	51416.2
1916	887.42	45.8382	2.00963e+06	879145	34321.3	18274.1	767593	31139
1917	501.207	28.2886	779481	387028	320030	214046	172900	141694
1918	202.167	43.5007	2.61681e+06	1.82305e+06	685147	500098	1.33312e+06	767026
1919	219.175	43.5005	9.87543e+06	6.86643e+06	2.5739e+06	1.92089e+06	4.981e+06	2.85555e+06
1920	1206.51	33.0989	101224	71595.5	0	0	21397.7	7447.26
1921	908.349	19.7493	74125.6	71498.7	0	0	52971.2	40700.9
1922	746.3	34.1665	0	1025.22	51215.3	37280.2	1392.93	15372.5
1923	357.349	49.0691	332905	180841	237853	244319	129770	173449
1924	451.254	35.5363	3.57114e+06	1.61631e+06	1.55423e+06	968020	542102	807799
1925	300.179	14.0213	645628	211053	1.13997e+06	494121	1.71078e+06	2.04642e+06
1926	327.253	53.1169	601863	317914	378104	341824	272413	307168
1927	704.525	54.1029	206603	140912	163025	157972	81535.5	97691.1
1928	492.26	40.9181	1.26494e+06	595181	125039	173039	394056	207515
1929	466.164	41.024	373116	190003	144189	175464	93312.5	71709.2
1930	626.368	53.8295	54169.1	13083.4	18456.8	12891.7	57563.3	161577
1931	952.458	50.0902	44192.3	71394.9	7743.06	5112.42	24254.5	21334.3
1932	900.362	24.7009	129453	67933.3	24789.3	6676.91	81495.8	33984.4
1933	536.39	54.0109	149162	123654	156195	163944	137515	163329
1934	220.061	37.488	352957	217354	54725.8	30062.7	153880	59994.9
1935	888.424	45.8382	1.06121e+06	470324	18884.3	9980.49	404845	17536.8
1936	150.026	49.874	129301	45856.6	51101.4	48650.9	32672	42863.4
1937	274.275	40.5247	654641	535612	197512	9.95812e+06	8.81739e+06	1.17e+07
1938	249.185	50.9584	296105	272732	554544	442951	295603	474028
1939	790.249	55.3646	160896	58173.4	52425.3	48150.1	48288.3	53193.6
1940	397.328	54.1797	299897	344573	390521	440568	440067	470726
1941	477.249	43.724	1.4429e+06	884362	267455	215519	485774	223036
1942	332.331	46.9709	158370	81494.9	138686	133838	81703	97139.9
1943	251.165	34.15	1.07605e+07	6.9935e+06	1.59103e+06	965273	4.44728e+06	1.34517e+06
1944	901.472	47.7029	83263.1	57112.3	55828.3	48529.1	172852	42335.4
1945	338.236	49.8727	324642	121301	181474	204609	126132	150969
1946	484.385	51.8582	2.35272e+06	962777	837558	852597	543803	554436
1947	847.367	35.516	68786.6	126638	36829.7	6547.95	137752	150566
1948	313.139	28.4913	336436	2.56906e+06	15288.5	10553.5	22497.2	31572.4
1949	261.179	43.553	182703	151745	262025	230809	165778	235738
1950	776.444	48.2372	322343	246234	124776	24520.4	21980.3	54617.1
1951	349.113	27.0772	67344.8	42930.5	162927	142650	100575	131603
1952	384.136	37.4839	3.57251e+06	2.08279e+06	524153	288137	1.50286e+06	594301
1953	520.334	54.0505	115042	91540.1	111653	117990	26000	34024.4
1954	450.226	44.9581	587497	717061	1.83244e+06	1.65644e+06	883962	915117
1955	899.359	24.7012	263990	130904	48124.9	12883.3	166210	77700.1
1956	410.349	53.1211	903369	272427	335976	329402	227934	278564
1957	445.361	54.0672	118926	112824	134100	126048	104957	109073
1958	889.315	28.3039	971898	743886	330214	234519	636011	370494
1959	330.265	48.1805	1.94909e+06	1.38296e+06	641955	593175	562798	486476
1960	720.333	35.2717	27633.8	26933.2	933.489	1156.41	50815.1	5824.39
1961	391.285	55.1449	707035	712955	674120	709181	4.19302e+06	4.87852e+06
1962	406.354	40.8669	149898	7992.24	25543.4	2467.29	48073.6	61301.5
1963	275.278	40.2401	3.50627e+06	1.34181e+06	2.33878e+06	1.6714e+06	1.46541e+06	1.96127e+06
1964	127.049	6.4413	276469	285910	89495.2	65615.6	188824	116988
1965	268.191	34.1956	2.03058e+07	1.30656e+07	2.17321e+06	1.37866e+06	8.54395e+06	2.02413e+06
1966	242.082	37.4878	354505	215491	55942.1	29898.2	158491	65483.2
1967	218.162	37.835	891446	599848	166848	108708	345237	135837
1968	217.159	37.8134	5.63922e+06	3.66265e+06	972782	633276	2.09674e+06	793774
1969	998.462	48.949	232085	167000	8958.92	2556.05	131118	84061.3
1970	298.072	37.4924	3.16364e+06	1.91598e+06	472969	268701	1.386e+06	543652
1971	499.217	31.6684	0	2154.43	107268	64432.3	48746.9	25647.6
1972	501.221	44.3299	192355	130521	13051	7731.69	107795	55731.7
1973	264.233	35.0106	2.38573e+06	2.00632e+06	384431	185169	713409	354196
1974	282.124	19.6413	134701	84702.9	8938.97	8416.28	26737	9281.17
1975	420.24	41.475	3.22025e+06	1.58444e+06	391042	152740	316486	284296
1976	371.363	44.5612	292292	7750.52	21938.3	46257.5	32124	42739
1977	640.338	50.3782	24752.3	30390	55990.9	57567.5	52539.2	65466.5
1978	707.414	51.3012	9046.7	15956.7	28543	29359	25133.1	32301.7
1979	364.119	37.4933	2.86458e+07	1.8705e+07	4.31082e+06	2.33657e+06	1.35133e+07	4.95168e+06
1980	383.133	37.4842	2.23464e+07	1.35901e+07	3.09808e+06	1.70557e+06	9.66675e+06	3.58446e+06
1981	175.111	31.6164	279705	197942	56512	44192.8	111761	88855.4
1982	201.164	43.502	1.63822e+07	1.15737e+07	4.25469e+06	3.1127e+06	8.48498e+06	4.74781e+06
1983	401.144	37.4943	267946	161123	40620.1	20117.9	108789	40896.9
1984	427.271	35.5313	749655	310067	295757	175383	100011	155469
1985	527.276	47.6782	8.8294e+06	3.48522e+06	3.15207e+06	2.44579e+06	1.88483e+06	1.63436e+06
1986	362.326	46.0957	99484.2	78773.8	118097	39093.9	27012.2	63194.2
1987	150.112	62.8866	1.10483e+06	752773	779152	732472	676042	504987
1988	450.251	35.5337	1.30117e+07	5.65036e+06	5.49319e+06	3.37675e+06	1.85836e+06	2.72316e+06
1989	902.283	28.3039	307998	242642	115128	81902.5	208782	124819
1990	470.369	50.1453	519672	134509	211126	213746	212702	242430
1991	111.08	29.4488	104372	63916	24206.6	15936.8	42527.8	21319
1992	406.293	54.1657	127608	119389	96384	100734	80705.3	76004.7
1993	1175.51	41.513	19997.2	23432.6	31003.4	24212	28461.4	38711.9
1994	410.341	54.182	172079	181188	220515	230149	232180	245405
1995	807.428	45.4437	32755.7	5119.43	13454.3	8127.46	38444.6	18738.4
1996	412.222	50.9527	102334	95405.5	187026	147968	102763	154057
1997	778.322	36.6243	0	430.41	2995.9	1625.41	135037	89009.5
[truncated: 3,084 more rows]

## Sheet: ΔcsdA
Supplementary Table 3 - High-resolution mass spectrometry data of Aspergillus fumigatus mutant strains.
Total ions (5081)
	m/Z	Re time	A. fumigatus CEA17.1-1	A. fumigatus CEA17.1-2	ΔcsdA-1	ΔcsdA-2	A. fumigatus CEA17.1vsΔcsdA_p value	A. fumigatus CEA17.1vsΔcsdA_-log10(p value)	A. fumigatus CEA17.1_mean+1	ΔcsdA_mean+1	A. fumigatus CEA17.1vsΔcsdA_log2foldchange
1	688.313	37.6715	330494	234747	334767	273473	0.741637	0.129808	282622	304121	0.105773
2	905.396	36.5466	88927.2	50670.5	67107.3	73115	0.988597	0.00498073	69799.9	70112.1	0.00643995
3	461.246	47.7134	4.83047e+06	3.07618e+06	3.16726e+06	2.29868e+06	0.33868	0.470211	3.95333e+06	2.73297e+06	-0.532597
4	429.221	47.7131	1.56487e+06	1.05625e+06	1.57216e+06	850701	0.843151	0.0740944	1.31056e+06	1.21143e+06	-0.113471
5	299.14	39.7056	106545	62980.5	91450	33431	0.601027	0.221106	84763.7	62441.5	-0.440941
6	357.162	42.902	104937	50172.1	110070	56401.8	0.895786	0.0477958	77555.4	83236.7	0.101993
7	259.127	16.4194	27475.9	40344.3	61958.4	19526.3	0.787086	0.103978	33911.1	40743.4	0.264807
8	1422.67	47.6929	62872.7	47285.5	48083.1	36998.8	0.320138	0.494663	55080.1	42541.9	-0.372646
9	579.284	47.6745	88688.1	68086.6	68505.3	63702.4	0.365369	0.437268	78388.4	66104.9	-0.245883
10	467.135	42.9524	229888	135713	130190	96776.3	0.299706	0.523305	182801	113484	-0.687786
11	1421.67	47.6919	169104	127144	118193	105091	0.23882	0.62193	148125	111643	-0.40792
12	328.193	36.2261	172203	128383	187131	128518	0.855975	0.0675388	150294	157825	0.070543
13	1074.42	47.6743	79250.1	67207.5	82676.8	54939	0.797527	0.0982546	73229.8	68808.9	-0.0898361
14	239.092	16.8087	71693.6	48546	79655.1	28912.4	0.853612	0.0687396	60120.8	54284.7	-0.147317
15	258.124	36.2249	125990	88859.7	141652	103319	0.629335	0.201118	107426	122486	0.189278
16	528.127	19.7517	106911	115903	86011	71239.4	0.063061	1.20024	111408	78626.2	-0.502773
17	667.454	39.5818	27980.4	26538.7	32015	22274.9	0.983549	0.007204	27260.5	27146	-0.0060752
18	346.137	33.1074	108222	72212.3	92062.3	50248.4	0.561059	0.250991	90218.3	71156.3	-0.342428
19	637.346	48.5504	57559.3	50924	104200	70191.3	0.197502	0.704429	54242.7	87196.6	0.684845
20	1201.54	47.6911	87529.5	54671.7	56944.8	52649.1	0.428856	0.367688	71101.6	54797.9	-0.375761
21	326.151	35.8777	6.41033e+06	4.45538e+06	6.94606e+06	4.63764e+06	0.834484	0.0785822	5.43286e+06	5.79185e+06	0.0923126
22	636.317	49.9627	60260.1	61915.3	77852.6	36898	0.872949	0.059011	61088.7	57376.3	-0.0904503
23	988.269	37.5137	25162.2	17396.7	24961.1	23192.1	0.555165	0.255578	21280.4	24077.6	0.178164
24	300.132	39.163	99580.9	49919.5	131469	46821.9	0.796884	0.098605	74751.2	89146.6	0.254083
25	1420.67	47.6887	340154	244518	229807	201795	0.264328	0.577857	292337	215802	-0.437922
26	459.241	47.6904	4.35093e+07	4.03295e+07	3.81368e+07	3.15184e+07	0.193127	0.714157	4.19194e+07	3.48276e+07	-0.267388
27	501.232	25.0814	419587	311607	140437	61158.8	0.0584281	1.23338	365598	100799	-1.85878
28	1419.66	47.691	376589	265014	246617	227263	0.276747	0.557918	320803	236941	-0.437157
29	270.125	36.2126	97143.2	68223	108127	72117.6	0.7779	0.109076	82684.1	90123.1	0.124287
30	117.054	2.83797	62578.9	52939.9	47800.8	52776.2	0.302259	0.519621	57760.4	50289.5	-0.199825
31	282.28	54.392	243160	222922	110470	176609	0.12247	0.91197	233042	143540	-0.699133
32	573.162	55.0049	0	6184.81	1750.16	9062.55	0.676665	0.169626	3093.4	5407.36	0.805728
33	327.154	36.216	1.34065e+06	942576	1.45328e+06	998019	0.807167	0.0930364	1.14161e+06	1.22565e+06	0.102473
34	464.184	32.8277	239728	131416	65368.5	41995.9	0.140265	0.853052	185573	53683.2	-1.78944
35	247.061	20.1762	217640	140328	89173.6	241232	0.886487	0.0523275	178985	165204	-0.115591
36	354.145	25.7513	99493.3	47796.1	30724.7	40744	0.286573	0.542764	73645.7	35735.3	-1.04325
37	476.193	36.2238	109545	56593.5	51654.6	22137.4	0.26714	0.573261	83070	36897	-1.17082
38	430.221	47.7681	328250	211529	254539	173782	0.514549	0.288574	269890	214162	-0.333671
39	336.172	49.9884	839096	358479	1.56492e+06	494974	0.538751	0.268612	598788	1.02995e+06	0.782455
40	1073.42	47.675	133291	105254	88549.9	89330.7	0.163036	0.787716	119273	88941.3	-0.423346
41	443.239	47.6883	359316	262464	345406	272012	0.97463	0.0111602	310891	308710	-0.0101551
42	1202.04	47.6927	121349	78098.2	72477.7	73763.3	0.343855	0.463625	99724.4	73121.5	-0.447652
43	500.203	25.0897	1.5019e+06	1.06091e+06	464724	199551	0.0662452	1.17885	1.2814e+06	332139	-1.94787
44	689.317	37.7045	64384.3	43265.2	142905	117174	0.0445293	1.35135	53825.7	130040	1.27259
45	248.173	47.6748	101101	68463.1	61127.5	48170.5	0.228259	0.641573	84782.9	54650	-0.633552
46	627.251	19.755	0	0	0	0	#DIV/0!	#DIV/0!	1	1	0
47	142.065	36.2199	44396.5	30161	66799.5	48823	0.215198	0.667161	37279.8	57812.2	0.632983
48	226.123	12.2528	26116.5	18730.7	42026.8	28350.3	0.242194	0.615837	22424.6	35189.5	0.650066
49	299.14	45.7225	21031.1	81716.7	46791.7	26473.1	0.69026	0.160987	51374.9	36633.4	-0.487904
50	666.192	19.7501	0	0	0	0	#DIV/0!	#DIV/0!	1	1	0
51	265.015	63.3923	23292.5	19351.4	22151.2	21099.1	0.895451	0.0479583	21322.9	21626.2	0.0203712
52	963.44	47.6883	138633	98799.5	130122	114890	0.875309	0.0578385	118717	122507	0.045334
53	237.185	42.6325	274881	166795	190513	150419	0.474331	0.323918	220839	170467	-0.373501
54	331.106	31.6886	85238.5	72914	87679.5	22303.3	0.544274	0.264183	79077.2	54992.4	-0.524029
55	835.309	38.5059	94124.3	44760.7	14928.9	18835.1	0.16776	0.77531	69443.5	16883	-2.04027
56	873.242	36.4815	17255.2	13071.8	34852.8	27351.8	0.0655365	1.18352	15164.5	31103.3	1.03637
57	279.948	64.0776	43841.1	39595.5	33802.3	39087.7	0.26005	0.584943	41719.3	36446	-0.194955
58	567.335	51.3408	428013	237245	349393	328373	0.953964	0.020468	332630	338884	0.026874
59	1220.56	48.5524	20077.2	5293.48	27043.2	14173.1	0.503725	0.297806	12686.3	20609.2	0.700013
60	356.162	42.9371	644463	192271	420996	206335	0.716339	0.144881	418368	313667	-0.415541
61	582.326	57.0341	12347.2	0	0	6922.72	0.738461	0.131672	6174.62	3462.36	-0.834597
62	444.68	19.7501	0	0	0	0	#DIV/0!	#DIV/0!	1	1	0
63	257.593	33.1131	0	0	2310.93	2597.77	0.00339727	2.46887	1	2455.35	11.2617
64	497.303	52.9519	254950	121601	237520	423035	0.3398	0.468777	188277	330278	0.81083
65	959.43	47.6803	124952	82397.1	85156.7	88665.1	0.514582	0.288546	103676	86911.9	-0.254451
66	653.229	19.7475	0	0	0	0	#DIV/0!	#DIV/0!	1	1	0
67	237.079	33.1135	4707.79	9258.22	23406	22142.9	0.0216354	1.66483	6984	22775.5	1.70535
68	256.264	54.2378	67796.8	67918.7	51367	60400.3	0.117705	0.929207	67858.8	55884.6	-0.280083
69	809.389	50.0452	40529.2	34182.9	36880.3	48933.3	0.500694	0.300427	37357	42907.8	0.199859
70	668.199	19.7501	0	0	18510.1	7989.88	0.128026	0.892702	1	13251	13.6938
71	662.137	22.9303	42503.2	51722.3	45646.8	26863.6	0.408365	0.388952	47113.7	36256.2	-0.377921
72	519.133	39.239	0	0	13121.8	9455.62	0.0253689	1.5957	1	11289.7	13.4627
73	986.365	19.7635	0	15050.1	13357.3	2436.02	0.971749	0.0124459	7526.03	7897.64	0.069533
74	1023.29	28.2871	107686	190254	153345	159744	0.87172	0.0596231	148971	156546	0.0715511
75	918.379	19.7501	0	0	0	0	#DIV/0!	#DIV/0!	1	1	0
76	462.178	32.8277	2.04145e+06	927251	1.22425e+06	765712	0.501921	0.299365	1.48435e+06	994983	-0.577091
77	199.087	34.489	131713	220570	554868	447072	0.043261	1.3639	176143	500971	1.50798
78	561.205	51.3027	27183.4	22964	34959.7	31370.2	0.0999297	1.00031	25074.7	33166	0.403471
79	623.194	19.7475	0	0	5625.51	2302.32	0.13979	0.854523	1	3964.92	11.9531
80	904.323	19.7501	0	0	0	0	#DIV/0!	#DIV/0!	1	1	0
81	797.238	36.4753	68077.7	0	116759	85729.8	0.214241	0.669098	34039.9	101245	1.57256
82	196.112	42.6176	178814	76339.5	246575	51750.1	0.86264	0.0641705	127578	149163	0.225516
83	569.147	38.454	12022.7	10162.2	44644.2	14181.7	0.35282	0.452447	11093.4	29413.9	1.40679
84	622.195	19.7538	0	0	24523.8	9757.29	0.145982	0.835702	1	17141.6	14.0652
85	738.275	39.2415	6043.85	4275.58	13140	8625.51	0.142146	0.847265	5160.72	10883.8	1.07653
86	932.352	29.9349	25619.2	16293.3	20668.5	9190.21	0.500673	0.300446	20957.2	14930.4	-0.489201
87	506.949	64.0865	38792.1	39659.3	44398.8	47521	0.0533008	1.27327	39226.7	45960.9	0.22857
88	652.227	19.7467	0	11347.7	28616.2	20243.4	0.117035	0.931683	5674.87	24430.8	2.10604
89	237.572	46.2983	0	663.547	5399.67	15426.8	0.182628	0.738432	332.774	10414.2	4.96787
90	965.273	37.3193	76983.5	46351.5	32990.3	23882.8	0.173075	0.761766	61668.5	28437.5	-1.11674
91	934.356	19.7501	0	0	0	0	#DIV/0!	#DIV/0!	1	1	0
92	836.312	38.6151	36792.8	0	9905.63	10349.3	0.697116	0.156695	18397.4	10128.5	-0.861088
93	1033.31	16.9856	5748.48	9006.71	12987.4	9209.38	0.274315	0.561751	7378.59	11099.4	0.589062
94	216.566	33.1135	0	440.91	7402.61	8104.91	0.00301551	2.52064	221.455	7754.76	5.13
95	931.349	29.9284	138787	13927.2	36689	15480.6	0.510491	0.292012	76358.1	26085.8	-1.54952
96	282.204	44.8861	78939.7	62451.6	77136.7	14516	0.522722	0.281729	70696.6	45827.4	-0.625432
97	714.37	37.0167	22989.9	19199.8	18225.4	5542.45	0.298597	0.524915	21095.9	11884.9	-0.827825
98	655.243	19.7538	0	0	0	0	#DIV/0!	#DIV/0!	1	1	0
99	636.75	37.7341	21114.7	2706.54	16007.2	16808.5	0.673716	0.171523	11911.6	16408.9	0.462105
100	443.954	64.0436	20520.9	22017.9	24102.6	25372.1	0.0715944	1.14512	21270.4	24738.3	0.217902
101	855.409	48.7405	59059.2	34857.9	93766.3	25850.8	0.755591	0.121713	46959.5	59809.6	0.348958
102	842.357	39.2376	2326.72	1696.94	3202.34	594.764	0.940387	0.0266932	2012.83	1899.55	-0.083566
103	824.292	34.5987	470.314	1984.35	182815	109860	0.0577916	1.23814	1228.33	146338	6.89646
104	240.161	22.5976	74922.5	48395.8	59702.2	34008.8	0.506836	0.295133	61660.1	46856.5	-0.396088
105	658.237	22.8494	1358.94	298.563	25192.4	13147.1	0.093649	1.0285	829.754	19170.7	4.53008
106	543.417	51.7936	229507	62663.2	167557	219356	0.641947	0.192501	146086	193457	0.405198
107	1417.47	34.5012	0	0	27699.7	27304.7	5.15557e-05	4.28772	1	27503.2	14.7473
108	222.193	46.5117	58668.8	51421.9	26901.1	14152	0.0422806	1.37386	55046.3	20527.6	-1.42308
109	913.022	34.4876	0	207.227	27545.7	23384.2	0.0066801	2.17522	104.614	25465.9	7.92735
110	945.266	28.2992	500891	374852	344401	242133	0.216725	0.66409	437872	293268	-0.578291
111	824.343	39.2376	4903.23	7389.46	15260	7584.11	0.321075	0.493393	6147.35	11423.1	0.893914
112	1108.43	46.2977	2806.39	749.563	22712.4	12308.5	0.0973034	1.01187	1778.98	17511.4	3.29918
113	531.139	37.2713	52934.2	807.091	21031.8	33349.1	0.991556	0.00368255	26871.6	27191.4	0.0170685
114	1421.45	34.5025	0	0	39817.2	49939.5	0.0124804	1.90377	1	44879.3	15.4538
115	1043.29	37.3002	41882.6	31179.6	96008.5	25977	0.561211	0.250874	36532.1	60993.8	0.739496
116	746.379	50.0064	82603.2	59441.6	135100	31387.2	0.839469	0.0759954	71023.4	83244.6	0.229063
117	586.246	19.7501	0	0	0	0	#DIV/0!	#DIV/0!	1	1	0
118	826.36	39.2415	4768.41	4431.72	12014.4	8749.03	0.0719959	1.14269	4601.06	10382.7	1.17414
119	905.326	19.7538	0	0	0	0	#DIV/0!	#DIV/0!	1	1	0
120	825.295	34.6046	220.274	613.776	95968.3	60516	0.0481672	1.31725	418.025	78243.2	7.54823
121	399.164	42.0072	616360	428989	581441	951749	0.360788	0.442748	522675	766596	0.552552
122	153.058	2.82865	164076	197428	148734	101921	0.193585	0.713129	180753	125329	-0.528304
123	242.119	42.8714	35348	24059.1	23050.5	13755	0.262238	0.581305	29704.6	18403.8	-0.690683
124	266.184	44.8861	157350	126495	137332	17831.8	0.406587	0.390846	141923	77582.8	-0.871301
125	336.167	24.5716	2.22114e+06	1.62978e+06	1.39346e+06	846803	0.1835	0.736364	1.92546e+06	1.12013e+06	-0.781535
126	374.148	48.8353	123351	67343.5	311768	125209	0.333487	0.476921	95348.2	218489	1.19629
127	270.113	43.0221	92479.1	72191.8	106951	70761.3	0.783025	0.106225	82336.5	88857.1	0.109955
128	1420.45	34.5025	0	276.951	44365.6	52589	0.00716556	2.14475	139.475	48478.3	8.44118
129	239.2	42.1174	28987	15720.4	75028.2	12465.1	0.572375	0.242319	22354.7	43747.6	0.968626
130	200.148	32.1736	114822	37722.9	46826.8	29725.1	0.43745	0.359072	76273.4	38276.9	-0.994705
131	1382.45	34.501	0	0	66908.3	69781.7	0.000441603	3.35497	1	68346	16.0606
132	479.133	33.1135	0	1490.88	21709.6	18165	0.00988776	2.0049	746.438	19938.3	4.73938
133	337.17	24.5712	426006	305126	261681	166374	0.187804	0.726295	365567	214028	-0.772333
134	398.161	42.0074	2.49483e+06	1.71223e+06	2.43924e+06	3.9457e+06	0.328113	0.483976	2.10353e+06	3.19247e+06	0.60186
135	919.382	19.7475	0	0	0	0	#DIV/0!	#DIV/0!	1	1	0
136	1383.45	34.495	0	0	34637.1	34983	2.46849e-05	4.60757	1	34811	15.0873
137	710.309	49.9482	40334.2	23163.2	138697	53962.3	0.27378	0.562598	31749.7	96330.7	1.60125
138	809.328	37.3201	63873.8	42694.4	49370.5	22213.4	0.416609	0.380272	53285.1	35792.9	-0.574057
139	1356.48	34.4865	0	0	60512	41807.9	0.0318289	1.49718	1	51161	15.6428
140	463.181	32.8277	611676	90807.1	349832	225983	0.834999	0.0783143	351243	287908	-0.286857
141	773.374	48.5354	33338.9	12727.1	24145.3	24360.1	0.91661	0.0378154	23034	24253.7	0.0744401
142	621.192	19.7496	0	5698.14	66316.4	46459.6	0.0352638	1.45267	2850.07	56389	4.30634
143	951.945	47.6917	70144.2	47359.2	34534.9	46005.8	0.28436	0.546131	58752.7	40271.3	-0.544902
144	1046.29	34.5008	0	564.13	231455	306309	0.018869	1.72425	283.065	268883	9.89163
145	257.066	2.91506	33343.8	24002.6	38998.8	39297.4	0.154252	0.81177	28674.2	39149.1	0.449226
146	234.086	22.3994	35166.5	22572.6	119368	77521.9	0.0860832	1.06508	28870.5	98446.1	1.76974
147	587.244	19.7609	0	0	0	0	#DIV/0!	#DIV/0!	1	1	0
148	1355.48	34.4865	0	0	202121	137260	0.0346378	1.46045	1	169692	17.3726
149	1045.28	34.5006	0	956.106	384945	500765	0.0167094	1.77704	479.053	442856	9.85244
150	1067.4	47.6803	41285.2	32916	41728	31130.1	0.929841	0.0315913	37101.6	36430	-0.0263541
151	442.232	47.9093	1.44783e+06	881629	854793	612288	0.296453	0.528044	1.16473e+06	733541	-0.667045
152	1927.63	34.489	0	0	94832.6	66069	0.0305024	1.51567	1	80451.8	16.2958
153	225.991	63.4152	44819.9	38934.9	36899.2	40461.3	0.450739	0.346075	41878.4	38681.2	-0.114573
154	944.469	47.7078	336706	243876	268225	130204	0.387749	0.411449	290292	199216	-0.543175
155	173.961	63.2885	63012.1	59231.9	65719.9	61701.7	0.447064	0.349631	61123	63711.8	0.0598444
156	1094.49	39.4643	5106.41	3922.12	2752.7	726.894	0.141771	0.848412	4515.27	1740.8	-1.37506
157	533.292	46.5859	348363	210551	224682	274010	0.720662	0.142269	279458	249347	-0.164475
158	667.196	19.7526	0	13936.2	65381.8	51115.9	0.0357936	1.44619	6969.1	58249.9	3.06321
159	1121.23	37.4808	38017.2	40686.6	44299.5	50607.3	0.141682	0.848684	39352.9	47454.4	0.270072
160	1354.47	34.4865	0	0	593151	411233	0.031275	1.5048	1	502193	18.9379
161	369.154	35.6705	149115	115424	122036	172077	0.672468	0.172329	132271	147058	0.152889
162	484.237	47.8837	299797	217260	267105	266024	0.863603	0.0636861	258529	266566	0.0441623
163	366.135	42.0065	1.87639e+06	1.3238e+06	1.87149e+06	3.06893e+06	0.317783	0.497869	1.6001e+06	2.47021e+06	0.626474
164	1352.47	34.4876	0	0	1.49548e+06	1.03423e+06	0.0316741	1.4993	1	1.26486e+06	20.2705
165	1353.47	34.4865	0	0	1.32659e+06	898118	0.0351491	1.45409	1	1.11235e+06	20.0852
166	217.107	16.8145	291594	131594	26135.7	26295.1	0.146411	0.834425	211595	26216.4	-3.01276
167	1378.97	34.501	0	210.05	39591.2	33180.6	0.00772308	2.11221	106.025	36386.9	8.42287
168	1379.97	34.501	0	0	69571.1	58097.3	0.00798047	2.09797	1	63835.2	15.9621
169	515.099	36.4878	280276	166493	57694.5	52637.4	0.0980401	1.0086	223385	55166.9	-2.01766
170	1131.39	34.5008	0	0	175034	182647	0.000452619	3.34427	1	178842	17.4483
171	147.08	47.6846	160364	111004	98893	78864.5	0.220939	0.655727	135685	88879.7	-0.610333
172	943.466	47.6986	1.10732e+06	802165	843088	427675	0.340976	0.467276	954746	635383	-0.587491
173	1132.39	34.5003	0	0	72172.4	77565.9	0.00129489	2.88777	1	74870.1	16.1921
174	427.213	47.6905	2.75605e+07	1.94835e+07	1.77888e+07	1.32201e+07	0.226132	0.645638	2.3522e+07	1.55045e+07	-0.601327
175	910.311	34.4884	4024.13	13929.4	3.56113e+06	2.86043e+06	0.0117648	1.92941	8977.78	3.21078e+06	8.48235
176	911.314	34.4877	0	5421.17	1.08671e+06	843327	0.0156259	1.80615	2711.59	965022	8.47528
177	1926.63	34.4879	0	0	103501	71726.4	0.0313448	1.50383	1	87614.9	16.4189
178	909.309	34.4891	12838	22231.9	6.39672e+06	5.11908e+06	0.0121598	1.91507	17536	5.7579e+06	8.35908
179	312.947	64.0832	78161.7	79365.6	104846	111720	0.0136855	1.86374	78764.6	108284	0.459202
180	1043.27	34.501	0	0	60550.6	64050.7	0.000788132	3.1034	1	62301.6	15.927
181	127.111	47.6782	163820	107961	97526.5	85447.8	0.26043	0.584308	135891	91488.2	-0.570797
182	367.138	42.0065	446501	311582	434640	701551	0.333521	0.476877	379042	568096	0.583776
183	288.179	32.1979	17698.6	11988.7	297187	176745	0.0664138	1.17774	14844.7	236967	3.99667
184	800.238	36.4655	1776.42	4284.39	17242.8	17478.6	0.00763667	2.1171	3031.4	17361.7	2.51785
185	912.317	34.4876	369.917	587.957	262518	205734	0.0144476	1.8402	479.937	234127	8.93023
186	436.155	41.4729	42076.6	37619.8	33427.4	33643.6	0.105505	0.976726	39849.2	33536.5	-0.24882
187	386.154	36.1012	82819.3	54423.6	87303.3	4005.74	0.653756	0.184584	68622.5	45655.5	-0.587891
188	1200.48	39.2536	13039.2	7266.13	5147.46	459.803	0.186745	0.72875	10153.7	2804.63	-1.85612
189	651.224	19.7491	37561.5	64964.2	92607.5	80456.1	0.142882	0.845024	51263.9	86532.8	0.755305
190	1181.26	34.5025	0	820.909	30742.5	38165.3	0.0118178	1.92746	411.455	34454.9	6.38783
191	247.17	47.6803	532242	355134	328025	257241	0.25405	0.59508	443689	292634	-0.600452
192	187.148	47.6848	369258	257270	230963	183421	0.223327	0.651058	313265	207193	-0.596408
193	663.428	34.1695	59914.1	51662	50160.1	38754.2	0.248744	0.604248	55789.1	44458.2	-0.327533
194	958.428	47.6748	165955	112669	119141	116264	0.503029	0.298407	139313	117703	-0.24318
195	1125.5	39.3908	17754.1	10404.2	5651.53	2162.43	0.129568	0.887503	14080.2	3907.98	-1.84917
196	716.327	31.2039	32576.8	22905.7	6567.05	13993.7	0.103362	0.985641	27742.3	10281.4	-1.43205
197	1011.23	36.4976	0	0	22136.2	22577.3	9.72968e-05	4.0119	1	22357.7	14.4485
198	1223.53	38.2932	5178.01	12264.9	24123.9	22066.8	0.0600214	1.22169	8722.46	23096.3	1.40486
199	137.046	3.20643	115100	199055	704637	442911	0.0937324	1.02811	157079	573775	1.869
200	597.195	46.3059	0	4322.95	38795	35177.8	0.00648576	2.18804	2162.47	36987.4	4.09628
201	700.367	36.2408	351153	367782	548841	991131	0.204747	0.688782	359469	769987	1.09897
202	1381.45	34.501	0	0	35997.8	50703.3	0.0275834	1.55935	1	43351.6	15.4038
203	358.154	49.9829	76302.1	45091.8	453611	141191	0.270623	0.567635	60698	297402	2.29269
204	427.16	34.4836	103388	28497.7	1.59913e+06	1.29381e+06	0.0127167	1.89562	65943.6	1.44647e+06	4.45516
205	143.085	47.6876	403314	273078	248383	183059	0.234746	0.629402	338197	215722	-0.648692
206	668.209	46.4012	67255.3	43830.3	48761.2	51725	0.697452	0.156486	55543.8	50244.1	-0.144673
207	662.192	19.7526	0	0	0	2480.36	0.42265	0.374019	1	1241.18	10.2775
208	237.185	40.7037	198507	225503	315192	185533	0.620972	0.206928	212006	250364	0.239919
209	203.576	28.556	0	0	610.778	1645.59	0.161014	0.793137	1	1129.18	10.1411
210	825.356	39.2402	39283.5	25958.7	18194.4	14446.8	0.142676	0.845648	32622.1	16321.6	-0.99907
211	1124.5	39.3876	28275.9	16005.9	6669.41	3599.33	0.114929	0.939572	22141.9	5135.37	-2.10824
212	217.07	2.88419	95208.8	82349.2	81281.5	93280.9	0.880432	0.0553044	88780	87282.2	-0.0245474
213	1196.38	34.5012	365.862	0	20151.5	17137.9	0.00669172	2.17446	183.931	18645.7	6.66354
214	240.077	34.4876	10077	8036.35	40712.1	34487.2	0.0129141	1.88894	9057.69	37600.6	2.05354
215	339.182	22.4793	24904.5	17921.9	142886	74114.2	0.127965	0.892908	21414.2	108501	2.34107
216	1199.03	47.6908	75614.1	49230.4	50381.3	56471	0.574746	0.240524	62423.3	53427.1	-0.224511
217	529.175	54.6061	7832.65	15141.2	17668.6	25180.8	0.198368	0.702529	11487.9	21425.7	0.899225
218	737.271	39.2436	35340.7	30996.8	25386.9	19337.2	0.101059	0.995424	33169.7	22363.1	-0.56875
219	444.168	34.4891	913081	1.3196e+06	2.45754e+07	1.97288e+07	0.0131021	1.88266	1.11634e+06	2.21521e+07	4.31059
220	863.349	35.4692	1400.36	1941.83	8935.79	47482.3	0.302436	0.519367	1672.09	28210.1	4.07648
221	933.208	36.4932	0	0	27480.7	21703.9	0.0135157	1.86916	1	24593.3	14.586
222	591.18	45.8391	172707	132530	153613	55361.8	0.460202	0.337051	152619	104488	-0.546595
223	460.243	47.6883	2.31758e+07	1.55205e+07	1.39097e+07	1.04333e+07	0.229917	0.638429	1.93481e+07	1.21715e+07	-0.668681
224	701.37	36.2364	91319.3	99517	140779	250595	0.210194	0.677381	95419.2	195688	1.0362
225	946.267	28.295	218839	159719	147161	99134.6	0.224622	0.648548	189280	123149	-0.620119
226	200.09	34.4876	20935.9	15808.2	87179.7	70922.7	0.0191648	1.7175	18373	79052.2	2.10522
227	234.135	16.8146	139119	63341.3	21043.3	18641.3	0.16489	0.782806	101231	19843.3	-2.35093
228	1078.43	48.0941	45248.3	26448.6	49692.2	12937.1	0.846533	0.072356	35849.4	31315.7	-0.195064
229	478.13	33.1065	38033.8	51666.5	68362	62176.9	0.112205	0.949988	44851.1	65270.4	0.541284
230	967.267	34.5001	0	2608.15	129632	116083	0.00320612	2.49402	1305.07	122859	6.55672
231	1051.32	37.2713	0	567.678	25821.2	15463.5	0.0592004	1.22768	284.839	20643.4	6.17939
232	1015.5	48.6102	49290	50888	24483.8	9766.03	0.0469043	1.32879	50090	17125.9	-1.54834
233	491.299	53.6526	166821	144661	96108	66833.4	0.056014	1.2517	155742	81471.7	-0.934783
234	968.27	34.5003	0	850.3	82936.4	71140.4	0.00590457	2.22881	426.15	77039.4	7.49809
235	266.184	47.6803	276518	188295	169056	133781	0.230351	0.637609	232408	151419	-0.61811
236	287.176	32.1668	30001.9	28279	1.49792e+06	894432	0.0608172	1.21597	29141.4	1.19618e+06	5.35922
237	426.157	34.489	273863	356307	5.89755e+06	4.6954e+06	0.014315	1.84421	315086	5.29647e+06	4.07122
238	877.256	36.4793	0	0	47123.2	38997.8	0.00878467	2.05627	1	43061.5	15.3941
239	369.095	19.7568	0	0	3569.02	7669.44	0.111327	0.953399	1	5620.23	12.4564
240	699.364	36.2436	700411	753349	1.16145e+06	2.13237e+06	0.198975	0.701202	726881	1.64691e+06	1.17997
241	446.173	34.4865	98644.3	104888	1.09168e+06	843189	0.0199963	1.69905	101767	967436	3.24889
242	116.071	2.55437	80084.4	103952	36737.8	109198	0.667009	0.175868	92019.1	72968.8	-0.334654
243	876.254	36.4767	0	0	152925	146467	0.000464939	3.3326	1	149697	17.1917
244	875.251	36.4793	0	641.411	293595	269963	0.00175908	2.75471	321.705	281780	9.77462
245	445.17	34.4878	262711	377461	6.72592e+06	5.24852e+06	0.0166669	1.77814	320087	5.98723e+06	4.22535
246	925.291	34.4865	5472.64	5544.81	37929.5	32849.9	0.00714869	2.14577	5509.73	35390.7	2.68332
247	532.262	42.4415	299673	212791	465412	471246	0.0396497	1.40176	256233	468330	0.870071
248	566.26	19.7476	0	16019.2	0	0	0.42265	0.374019	8010.62	1	-12.9677
249	945.279	37.2801	0	0	40373.5	20723.9	0.0897305	1.04706	1	30549.7	14.8989
250	265.18	47.6826	1.59705e+06	1.03871e+06	966166	711818	0.258892	0.586881	1.31788e+06	838993	-0.651492
251	350.14	35.6749	364301	284438	302163	459815	0.587301	0.23114	324371	380990	0.23211
252	367.138	40.5739	81358.4	49744.4	81044.5	103787	0.3017	0.520425	65552.4	92416.9	0.495508
253	581.323	57.04	52439.1	28684.9	10777.8	41968.5	0.544397	0.264084	40563	26374.2	-0.621038
254	434.141	38.8824	33034.6	36736.3	34927.5	47442.9	0.436209	0.360305	34886.4	41186.2	0.239494
255	216.147	47.6803	658477	433527	387948	294642	0.234756	0.629384	546003	341296	-0.677885
256	1340.48	33.1066	19441.3	27147.1	20705.9	5845.71	0.353947	0.451062	23295.2	13276.8	-0.811126
257	498.175	36.2192	101534	702.814	20779.6	9932.34	0.553709	0.256718	51119.6	15357	-1.73498
258	1229.38	36.4767	0	0	67002.3	49581.8	0.0216066	1.66541	1	58293.1	15.831
259	441.955	64.0865	35424.4	32892	48018.4	47639.4	0.00865705	2.06263	34159.2	47829.9	0.485639
260	933.359	29.9409	43225.1	32657.2	11717.6	4624.13	0.0427848	1.36871	37942.1	8171.85	-2.21507
261	476.194	38.0366	111726	54063	268242	153128	0.185545	0.731551	82895.5	210686	1.34573
262	799.236	36.4815	0	0	54181.7	41826.6	0.0161603	1.79155	1	48005.1	15.5509
263	1039.27	34.5008	0	0	32645.4	32692.7	5.2471e-07	6.28008	1	32670.1	14.9957
264	513.337	51.7867	381241	105518	85768.4	113910	0.409109	0.388161	243381	99840	-1.28553
265	905.356	42.3186	1760.05	973.178	58362.8	16850.6	0.222982	0.65173	1367.61	37607.7	4.78129
266	1227.38	36.4767	0	0	217065	147240	0.034828	1.45807	1	182154	17.4748
267	207.175	45.6957	42232	29879.5	160140	23221.8	0.503342	0.298137	36056.8	91681.8	1.34636
268	153.954	1.97126	9073.19	9324.11	8048.77	8305.65	0.0295371	1.52963	9199.65	8178.21	-0.169793
269	350.14	33.6961	222636	161537	184627	207619	0.912888	0.0395823	192087	196124	0.0300026
270	739.302	36.4598	465823	310984	5.91878e+06	5.39706e+06	0.00265585	2.5758	388404	5.65792e+06	3.86464
271	1228.38	36.4767	0	0	159887	112691	0.0286954	1.54219	1	136290	17.0563
272	476.159	34.4878	10477.2	10771.2	68106.1	51554.6	0.0271482	1.56626	10625.2	59831.4	2.49341
273	324.098	19.7476	33361.2	26836.6	9492.13	2171.75	0.0384815	1.41475	30099.9	5832.94	-2.36746
274	400.167	41.999	110523	76914.3	105887	168436	0.345685	0.461319	93719.5	137163	0.549466
275	743.287	36.4767	2733.68	2288.99	24898.7	23018.5	0.00202268	2.69407	2512.33	23959.6	3.2535
276	740.291	36.4598	226895	157355	2.82495e+06	2.56262e+06	0.00292922	2.53325	192126	2.69378e+06	3.80951
277	480.145	36.6661	35597.5	29408.7	26542.3	17580.7	0.195213	0.709492	32504.1	22062.5	-0.559023
278	728.313	19.7513	0	0	0	0	#DIV/0!	#DIV/0!	1	1	0
279	1585.52	36.4772	0	0	37453	20458.7	0.0763787	1.11703	1	28956.8	14.8216
280	1044.3	37.2867	0	0	53079.8	30447.7	0.0662086	1.17909	1	41764.8	15.35
281	1586.52	36.4772	0	0	37355.7	21283.4	0.0675961	1.17008	1	29320.6	14.8396
282	1158.52	39.2363	17174.8	9153.82	8659.03	4868.7	0.285823	0.543903	13165.3	6764.87	-0.96061
283	649.266	48.5581	45601.2	35588.2	64384	71662.8	0.0473358	1.32481	40595.7	68024.4	0.744726
284	422.353	51.7936	40719.6	16480.6	50701.4	60604.3	0.174764	0.757547	28601.1	55653.8	0.96041
285	554.937	64.0436	22295.5	20415.9	26779.2	26780.4	0.0287301	1.54166	21356.7	26780.8	0.32651
286	219.113	22.7961	570928	344728	244082	190400	0.174338	0.758608	457829	217242	-1.0755
287	1921.69	34.4866	0	0	101430	38604.9	0.155616	0.807946	1	70018.6	16.0955
288	525.1	47.0222	36978.3	28486.8	37677.4	30529.8	0.827908	0.082018	32733.5	34104.6	0.0591984
289	1923.68	34.4866	0	0	149061	57038.9	0.154457	0.811193	1	103051	16.653
290	971.28	34.5035	1734.68	4398.69	40425.6	33866.6	0.0106164	1.97402	3067.69	37147.1	3.59803
291	286.311	43.0931	78236	54530.7	39893.2	54924.2	0.308973	0.510079	66384.3	47409.7	-0.485659
292	494.102	33.1081	979.964	16287.8	70836.8	52599.3	0.046795	1.3298	8634.87	61719	2.83747
293	239.967	63.4724	101068	89925.2	97107.8	106861	0.473291	0.324872	95497.4	101985	0.0948298
294	233.154	47.6772	3.8769e+06	2.52862e+06	2.28306e+06	1.76529e+06	0.244252	0.612161	3.20276e+06	2.02417e+06	-0.661982
295	196.112	46.1473	35466.2	26989.4	153050	32539.6	0.415311	0.381627	31228.8	92795.8	1.57118
296	428.216	47.6848	7.82655e+06	5.08466e+06	4.65037e+06	3.445e+06	0.249118	0.603595	6.45561e+06	4.04769e+06	-0.673456
297	942.462	47.6962	4.27975e+06	3.06291e+06	3.01299e+06	1.6596e+06	0.280041	0.552778	3.67133e+06	2.3363e+06	-0.652079
298	149.059	47.6802	352274	245058	223220	163846	0.228365	0.641371	298667	193534	-0.625952
299	798.24	36.4815	675.239	3850.91	61599.7	45081.5	0.0260573	1.58407	2264.07	53341.6	4.55827
300	230.093	37.2844	48107.5	1856.99	107336	69348.9	0.168439	0.773556	24983.3	88343.3	1.82216
301	1922.69	34.4876	0	0	237192	88527.6	0.159823	0.796361	1	162861	17.3133
302	882.315	37.3807	684263	636102	2.07225e+06	950573	0.268686	0.570755	660183	1.51141e+06	1.19496
303	869.238	36.4857	0	0	45124.2	37198.1	0.0091432	2.0389	1	41162.2	15.329
304	359.152	36.4781	367547	378681	2.76299e+07	2.40089e+07	0.0050243	2.29892	373115	2.58194e+07	6.11269
305	361.157	36.4742	22158.2	12174.8	895028	734594	0.0100009	1.99996	17167.5	814812	5.56872
306	360.154	36.4761	116891	99311.2	6.96113e+06	5.81771e+06	0.00818454	2.08701	108102	6.38943e+06	5.88522
307	362.16	36.4788	2868.12	1206.6	102345	85379.9	0.0085059	2.07028	2038.36	93863.6	5.52509
308	747.382	50.0044	45771.5	30734.1	74921.9	19682.6	0.78184	0.106882	38253.8	47303.2	0.306335
309	870.243	36.4932	0	0	15980	14624.3	0.00195674	2.70847	1	15303.1	13.9015
310	409.299	50.3657	268220	74624.4	35459.5	82030.5	0.375174	0.425768	171423	58746	-1.545
311	477.196	38.0339	34993.4	1355.68	75361.2	44633.4	0.207781	0.682394	18175.5	59998.3	1.72292
312	131.049	47.6893	662387	448074	412350	318703	0.246217	0.608683	555232	365528	-0.603109
313	378.173	25.4942	255401	245269	435593	211015	0.582821	0.234465	250336	323305	0.369028
314	255.15	13.6164	26320.2	18495.6	505174	423427	0.00852387	2.06936	22408.9	464302	4.37292
315	915.345	37.2743	53099.6	81096.3	1.35218e+06	828188	0.0599166	1.22245	67099	1.09019e+06	4.02214
316	883.317	37.4095	214149	223729	639074	311003	0.258999	0.586703	218940	475039	1.11751
317	914.342	37.2717	154235	230807	4.50441e+06	2.70752e+06	0.0629242	1.20118	192522	3.60597e+06	4.22729
318	913.339	37.2717	267947	431492	8.19067e+06	4.87274e+06	0.0652076	1.1857	349720	6.5317e+06	4.22319
319	881.312	37.3848	1.32339e+06	1.21972e+06	3.8791e+06	1.78441e+06	0.275184	0.560377	1.27155e+06	2.83176e+06	1.1551
320	1339.47	33.1113	55074.8	60302.8	42992.6	19114.7	0.161145	0.792784	57689.8	31054.7	-0.893506
321	215.143	47.6826	4.07106e+06	2.59122e+06	2.3439e+06	1.77188e+06	0.249695	0.60259	3.33114e+06	2.05789e+06	-0.694851
322	945.459	47.6896	457321	312390	329843	221254	0.350768	0.45498	384856	275549	-0.48201
323	1859.66	34.4852	0	0	22877.9	16773.7	0.0228886	1.64038	1	19826.8	14.2752
324	234.157	47.6777	613113	398904	378532	285790	0.274793	0.560994	506009	332162	-0.607277
325	393.143	25.1953	68946.8	35254.2	12208	66898.7	0.733735	0.134461	52101.5	39554.3	-0.397489
326	916.347	37.2767	5762.24	20635.8	328196	201631	0.0585102	1.23277	13200	264915	4.32692
327	255.149	32.6036	39790.8	24356.2	80812.7	19918.5	0.619225	0.208151	32074.5	50366.6	0.651042
328	446.9	34.4877	1680.49	4824.84	38588.6	31894.5	0.0131013	1.88268	3253.67	35242.6	3.43718
329	878.812	63.4325	47270.9	53029.1	33465.2	7082.38	0.157395	0.80301	50151	20274.8	-1.30659
330	734.333	36.3799	0	534.885	174579	414145	0.133469	0.874621	268.442	294363	10.0988
331	798.324	31.8612	16783.6	26162.2	52049.6	13149	0.634049	0.197877	21473.9	32600.3	0.602301
332	409.202	47.6826	4.46423e+06	3.12041e+06	2.59016e+06	2.16587e+06	0.182523	0.738682	3.79232e+06	2.37801e+06	-0.673324
333	366.135	40.5761	324370	187118	312763	426429	0.329603	0.482009	255745	369597	0.531246
334	129.069	47.6904	205849	136658	126057	92834.3	0.248575	0.604543	171254	109447	-0.645914
335	1338.47	33.1097	72439.4	81948.9	56588.3	23870.2	0.162234	0.789858	77195.1	40230.2	-0.940229
336	381.133	36.4828	28590.2	35692.7	2.78822e+06	2.63159e+06	0.000855989	3.06753	32142.5	2.70991e+06	6.39762
337	197.132	47.6814	1.09899e+06	702933	622411	484682	0.239362	0.620945	900964	553547	-0.702763
338	378.144	42.9164	4715.62	35521.1	130213	68540.5	0.148208	0.829127	20119.4	99377.6	2.30433
339	178.059	47.6785	238216	163146	138687	109062	0.197305	0.704862	200682	123875	-0.696022
340	290.011	14.6422	2126.58	3184.86	28485.3	34057.7	0.00967967	2.01414	2656.72	31272.5	3.55717
341	296.113	22.5582	80763.7	19183.6	598298	438513	0.0318225	1.49727	49974.7	518406	3.37481
342	348.171	36.8431	3.15257e+06	1.38188e+06	395010	943574	0.226844	0.644273	2.26723e+06	669293	-1.76022
343	732.328	36.3929	12213.1	28960.5	1.28412e+06	3.31011e+06	0.153644	0.813483	20587.8	2.29712e+06	6.80189
344	281.178	48.9478	73377.3	33348.8	81692	54059.6	0.611232	0.213794	53364	67876.8	0.34705
345	363.147	35.9949	13810.3	14612.8	23073.9	11019.3	0.685029	0.164291	14212.6	17047.6	0.2624
346	691.503	50.5413	155475	37464.1	70731.4	79555.7	0.753039	0.123182	96470.6	75144.5	-0.360422
347	823.34	39.2414	31219.5	38886	26408.7	9211.05	0.208497	0.680901	35053.7	17810.9	-0.97681
348	398.11	36.4709	0	0	25581.7	22401.6	0.00436353	2.36016	1	23992.6	14.5503
349	1077.43	48.0995	162642	97569.7	146487	40119.1	0.614812	0.211257	130107	93304.2	-0.479681
350	125.096	47.6893	1.02153e+06	657888	602078	468493	0.25665	0.590659	839710	535287	-0.64958
351	297.117	22.5582	9496.18	12899.2	102299	77079.9	0.0252857	1.59712	11198.7	89690.6	3.00163
352	709.305	49.9458	72949.3	42539.8	278642	104498	0.269211	0.569908	57745.6	191571	1.7301
353	301.071	22.5567	94434.9	72388.8	291753	215785	0.0499004	1.3019	83412.8	253770	1.60518
354	459.075	36.5091	0	0	61657	50456.7	0.00983329	2.0073	1	56057.9	15.7746
355	391.181	47.6727	163749	109397	101432	70633.1	0.247061	0.607196	136574	86033.6	-0.66671
356	941.459	47.6905	1.74261e+07	1.22307e+07	1.1531e+07	6.41959e+06	0.249464	0.602992	1.48284e+07	8.97528e+06	-0.724335
357	741.305	36.3834	100001	77175.6	743031	673331	0.00348464	2.45784	88589.5	708182	2.99891
358	1357.46	34.4852	0	0	15718.9	1683.86	0.340739	0.467578	1	8702.4	13.0872
359	374.362	50.8216	85633.5	64563.5	21779.6	46150.9	0.1252	0.902395	75099.5	33966.2	-1.1447
360	369.205	47.1963	207400	81694.9	71670.9	177183	0.829169	0.0813569	144548	124428	-0.216242
361	751.314	32.795	3233.31	1915.73	10153.3	19559.5	0.122613	0.911464	2575.52	14857.4	2.52825
362	630.354	36.1873	32074.2	34241	58128.3	4156.09	0.947307	0.0235094	33158.6	31143.2	-0.0904665
363	976.314	37.2752	0	0	22498.5	12244.2	0.0771652	1.11258	1	17372.3	14.0845
364	733.331	36.3708	1605.11	9897.89	636966	1.6089e+06	0.14827	0.828947	5752.5	1.12293e+06	7.60887
365	109.065	47.6802	453713	290488	264087	203898	0.253267	0.596421	372101	233993	-0.669228
366	165.074	16.8259	74540	57303	100445	165137	0.183827	0.735591	65922.5	132792	1.01033
367	443.103	36.4945	0	0	80014.1	84007.9	0.000592365	3.22741	1	82012	16.3235
368	983.42	48.1315	71427.9	56751.3	96907.1	93785.7	0.0530684	1.27516	64090.6	95347.4	0.573081
369	671.329	49.9723	62449.4	26349.2	111234	33966.7	0.576392	0.239282	44400.3	72601.4	0.709428
370	975.309	37.279	0	0	42065.2	27130.9	0.0435598	1.36091	1	34599.1	15.0784
371	906.398	36.5432	0	0	39160.8	41901.6	0.00114127	2.94261	1	40532.2	15.3068
372	190.972	1.98945	8909.66	10417	13575.6	15446.3	0.0562694	1.24973	9664.35	14511.9	0.586495
373	468.123	28.5292	0	5268	19146.1	36248.5	0.107322	0.96931	2635	27698.3	3.39392
374	469.127	28.5718	532.982	664.15	5514.56	9720.33	0.0793082	1.10068	599.566	7618.44	3.66751
375	971.299	37.2867	0	524.625	98900.9	61810.5	0.0496629	1.30397	263.312	80356.7	8.2535
376	972.281	34.501	0	1267.18	7141.06	20551.5	0.188807	0.723981	634.591	13847.3	4.44763
377	499.231	45.3636	308266	191731	217051	98099.3	0.382571	0.417288	250000	157576	-0.665874
378	461.946	47.6785	135609	89755.1	80823.1	60872.9	0.236268	0.626596	112683	70849	-0.669451
379	558.893	64.061	25166	26562.2	32887.5	34566.8	0.0187449	1.72712	25865.1	33728.1	0.382948
380	195.065	47.6887	1.41268e+06	892328	777153	567719	0.229078	0.640016	1.1525e+06	672437	-0.777302
381	1075.43	48.1073	703260	410178	642678	172811	0.64442	0.190831	556720	407745	-0.449283
382	1047.32	34.501	0	728.193	93898.9	103914	0.00258605	2.58736	365.096	98907.6	8.08166
383	91.0544	47.6876	566909	365750	324617	254838	0.239006	0.621591	466330	289728	-0.686652
384	208.178	45.698	5313.36	4617.29	22904.4	5728.58	0.390245	0.408663	4966.33	14317.5	1.52753
385	199.148	37.7822	700371	457818	269460	140797	0.112477	0.948936	579096	205129	-1.49727
386	669.2	19.7512	0	0	0	0	#DIV/0!	#DIV/0!	1	1	0
387	141.091	47.6848	358012	229971	213738	160212	0.262957	0.580115	293993	186976	-0.652929
388	449.12	36.507	0	608.464	76526.5	82726.3	0.00153838	2.81294	305.232	79627.4	8.02722
389	241.967	63.4769	22479	15136.8	17242.6	19686.4	0.937371	0.0280886	18808.9	18465.5	-0.0265805
390	553.938	64.0865	140326	144137	186596	194578	0.00826251	2.08289	142232	190588	0.422206
391	1076.43	48.103	420493	244234	380058	107286	0.63972	0.19401	332365	243673	-0.447822
392	946.463	47.6929	171875	128996	122069	84982.8	0.239775	0.620196	150436	103527	-0.539147
393	153.025	63.4101	211476	178878	196443	207528	0.730688	0.136268	195178	201986	0.0494682
394	605.248	19.6329	15498.4	8096.04	23005.4	11653.9	0.500008	0.301023	11798.2	17330.6	0.554753
395	1050.32	37.2837	0	666.681	64439.7	50186.7	0.0153174	1.81482	334.341	57314.2	7.42143
396	320.205	28.8396	1.11716e+06	908169	684321	387196	0.119584	0.922327	1.01267e+06	535759	-0.918502
397	279.088	22.5586	51338	45561.5	793668	586465	0.0251138	1.60009	48450.7	690068	3.83215
398	969.46	38.2903	68645.7	55996.5	10393.9	7213.7	0.0145263	1.83784	62322.1	8804.81	-2.82338
399	1097.56	47.7829	58973.5	40858.9	62265.9	66958.8	0.256839	0.59034	49917.2	64613.4	0.372296
400	1143.6	49.0854	42077.1	32571.1	5917.87	6477.54	0.0226076	1.64575	37325.1	6198.71	-2.59011
401	1371.4	28.2895	93926.4	76848.5	78443.5	26867.7	0.351461	0.454123	85388.5	52656.6	-0.697426
402	177.055	47.6826	2.21976e+06	1.40552e+06	1.25572e+06	946907	0.243937	0.612723	1.81265e+06	1.10132e+06	-0.718869
403	447.186	29.9373	15710	10723.7	319507	203503	0.0505627	1.29617	13217.8	261506	4.30628
404	432.139	33.1291	27214.4	12260.3	25550.1	15011.6	0.958019	0.0186257	19738.3	20281.9	0.0391912
405	444.108	36.5161	0	425.376	7527.92	21226.1	0.174676	0.757767	213.688	14378	6.07222
406	311.97	64.0421	21015.5	16946.9	15854.3	20597	0.831459	0.0801593	18982.2	18226.7	-0.058595
407	912.327	37.1354	1609.91	289.558	35437.9	14678.9	0.146331	0.834664	950.732	25059.4	4.72017
408	507.175	34.4943	4498.51	9382.87	54229.5	50106.3	0.00495655	2.30482	6941.69	52168.9	2.90983
409	647.477	50.491	144546	38183.9	80825.8	94548.4	0.95156	0.0215637	91365.7	87688.1	-0.059272
410	271.145	22.4636	35954.9	36843.2	539635	258655	0.122941	0.910302	36400	399146	3.4549
411	446.183	29.9373	37021	20720	1.14678e+06	676306	0.0643256	1.19162	28871.5	911545	4.98059
412	555.936	64.0769	44800.8	42848	58023.5	56501.1	0.00838175	2.07667	43825.4	57263.3	0.385843
413	947.209	47.69	56247	35992.4	33885.7	15991.2	0.257542	0.589152	46120.7	24939.5	-0.886983
414	83.0139	47.6751	164451	110639	101779	75732.7	0.244239	0.612185	137546	88757.1	-0.631976
415	233.081	22.4042	23070.4	28221.1	810303	493293	0.0585268	1.23265	25646.7	651799	4.66758
416	198.136	47.6768	188002	116415	104038	81053.9	0.253408	0.59618	152209	92547.1	-0.717798
417	485.327	51.3258	529887	163183	459703	339360	0.809369	0.0918535	346536	399532	0.205306
418	1005.39	42.1601	955.233	257.953	37968.5	49189.6	0.0166849	1.77768	607.593	43580.1	6.16442
419	728.272	48.5506	35719.1	37399.7	68238.5	78513	0.0194116	1.71194	36560.4	73376.7	1.00504
420	1081.28	33.1066	2366.35	19378.7	23574.6	13392.8	0.522877	0.281601	10873.5	18484.7	0.765514
421	618.327	41.6602	30201.4	34793	92728.7	50556.9	0.206242	0.685622	32498.2	71643.8	1.14048
422	735.334	36.3581	0	0	36841.3	83522.2	0.123221	0.909315	1	60182.8	15.8771
423	807.263	36.4953	0	1159.16	10733.1	12738.8	0.0106081	1.97436	580.582	11737	4.33742
424	590.257	19.7463	3.28677e+06	3.08633e+06	2.96957e+06	2.39425e+06	0.239441	0.620802	3.18655e+06	2.68191e+06	-0.248733
425	750.311	32.7959	2923.04	2363.99	15279.2	40934.6	0.185621	0.731372	2644.51	28107.9	3.4099
426	241.096	22.7983	16894	49731.1	106814	95666.2	0.0594083	1.22615	33313.6	101241	1.60361
427	1064.57	46.593	43727.7	30740.6	34944.9	40476.8	0.952299	0.0212267	37235.2	37711.9	0.0183519
428	707.315	36.3346	54327.2	40862.7	151452	84059.8	0.17793	0.749752	47596	117757	1.3069
429	387.963	64.058	17913.5	19458.1	22159	21287.6	0.0756716	1.12107	18686.8	21724.3	0.217289
430	1264.63	48.9811	0	0	4447.99	0	0.42265	0.374019	1	2225	11.1196
431	560.361	37.9178	68159.2	47248.6	52211.7	24191.2	0.380655	0.419468	57704.9	38202.4	-0.595028
432	895.367	37.2841	0	0	49770.2	25546.1	0.0897395	1.04702	1	37659.2	15.2007
433	345.135	33.1306	1329.07	4450.69	373585	206306	0.0754415	1.12239	2890.88	289947	6.64814
434	717.317	39.4966	137129	71185.6	27893	14264.8	0.132392	0.87814	104158	21079.9	-2.30483
435	972.303	37.2837	0	759.023	56388.5	35239.7	0.0501891	1.29939	380.512	45815.1	6.91174
436	562.303	44.0205	293986	175725	215048	267432	0.930362	0.0313481	234857	241241	0.0386958
437	1017.28	37.4414	1466.34	7662.36	49458.8	38475.9	0.0246615	1.60798	4565.35	43968.3	3.26767
438	508.255	41.078	415825	282330	178283	75006.2	0.118826	0.92509	349078	126646	-1.46275
439	589.254	19.7475	9.27572e+06	8.74075e+06	8.37986e+06	6.76453e+06	0.233495	0.631723	9.00823e+06	7.5722e+06	-0.250532
440	219.566	36.4975	0	0	37631.7	35015.3	0.00129456	2.88788	1	36324.5	15.1487
441	412.863	63.5754	88794.3	80444.5	80695.4	86399.1	0.851712	0.069707	84620.4	83548.2	-0.0183958
442	1096.56	47.7857	73751.7	55358.6	85184.3	88131.4	0.14097	0.850872	64556.2	86658.9	0.424792
443	591.26	19.7466	665017	622438	586232	480745	0.192185	0.71628	643728	533490	-0.270991
444	159.116	31.1669	278453	180655	198358	54510.6	0.35753	0.446687	229555	126435	-0.860441
445	349.175	36.839	741747	339722	108734	221701	0.213921	0.669746	540735	165218	-1.71055
446	563.307	44.0272	116497	69031.3	85052.9	100569	0.99867	0.000577914	92765.1	92812	0.000730098
447	748.331	39.4164	110559	59950	25386.6	14574.4	0.127723	0.893731	85255.6	19981.5	-2.09313
448	747.328	39.41	210445	117553	44743.3	24598.6	0.112674	0.948175	164000	34671.9	-2.24185
449	408.958	64.0865	110346	100825	77701	84253.5	0.0509697	1.29269	105586	80978.3	-0.382814
450	750.346	38.9599	148818	114109	32911.1	30988.2	0.0291767	1.53496	131464	31950.7	-2.04076
451	280.091	22.5605	5412.34	6811.78	124901	96694.7	0.0177123	1.75172	6113.06	110799	4.17991
452	475.23	50.0902	122559	96176.6	53242.6	55981.9	0.0539587	1.26794	109369	54613.2	-1.00188
453	909.434	39.1616	10135.4	14201.3	20013.4	17052.3	0.12706	0.895992	12169.4	18533.9	0.606909
454	360.237	54.1674	32042.3	33583	42421.6	37671.7	0.10134	0.994219	32813.6	40047.7	0.287422
455	319.202	28.8532	5.70336e+06	4.54083e+06	3.34358e+06	1.83968e+06	0.116854	0.932358	5.1221e+06	2.59163e+06	-0.982873
456	468.138	42.945	1279.25	1455.46	36306.6	28508	0.0154244	1.81179	1368.35	32408.3	4.56585
457	371.4	55.9309	66289.1	86266.2	89022.7	99870.5	0.251037	0.600262	76278.6	94447.6	0.308236
458	421.347	51.7936	30344.8	15758.2	130947	159907	0.0171033	1.76692	23052.5	145428	2.65731
459	466.149	34.5008	37942.5	125964	1.4982e+06	1.68687e+06	0.00471551	2.32647	81954.2	1.59254e+06	4.28036
460	718.321	39.4998	70263.9	38335.4	16404.1	8726.5	0.126151	0.899111	54300.7	12566.3	-2.11141
461	842.342	37.7167	88351.6	48154.7	43440.8	16346.1	0.254332	0.594599	68254.2	29894.4	-1.19104
462	424.929	64.0865	84872.7	80445.1	112879	115171	0.00625735	2.20361	82659.9	114026	0.464105
463	471.287	51.3009	9.81607e+06	5.32869e+06	8.81239e+06	7.31845e+06	0.854148	0.0684667	7.57238e+06	8.06542e+06	0.0910031
464	749.344	38.9481	294017	213289	75771.5	60177.7	0.0456866	1.34021	253654	67975.6	-1.89977
465	1222.53	38.2874	31521.4	39406.6	37504.3	35229.8	0.846239	0.0725069	35465	36368	0.036274
466	744.356	38.2527	15726.2	13069.3	61394.9	100496	0.0768449	1.11438	14398.8	80946.3	2.49102
467	939.271	37.4528	0	1838.04	40576.8	23703.7	0.0665891	1.1766	920.02	32141.3	5.12662
468	282.907	63.5623	139698	114490	116694	123845	0.654368	0.184178	127095	120270	-0.0796253
469	472.29	51.3026	2.7881e+06	1.55172e+06	2.50219e+06	2.10903e+06	0.85367	0.0687102	2.16991e+06	2.30561e+06	0.0875147
470	267.196	45.6772	46613	387319	2.0096e+06	444514	0.33441	0.475721	216967	1.22706e+06	2.49965
471	590.334	47.6803	285261	202256	130062	174812	0.192377	0.715846	243759	152438	-0.677235
472	196.069	47.6899	162736	101488	88988.7	69014	0.240955	0.618064	132113	79002.3	-0.74181
473	1033.51	46.5303	3749.87	10035.6	13979.8	10277.7	0.287627	0.54117	6893.76	12129.8	0.815192
474	511.225	29.349	67585.2	45570.9	12018.1	18608	0.0695381	1.15778	56579.1	15314.1	-1.88541
475	512.192	36.0967	9069.53	5993.18	97491.7	80139.4	0.0115481	1.93749	7532.35	88816.5	3.55966
476	445.151	42.9485	29206.8	22885.6	342089	217241	0.0557102	1.25407	26047.2	279666	3.4245
477	861.353	36.2556	10161.7	17791.2	37475	64806.6	0.12006	0.920602	13977.5	51141.8	1.8714
478	737.38	50.0017	71044.4	65046.1	30109.6	73361.2	0.532926	0.273333	68046.2	51736.4	-0.395336
479	771.375	36.4978	22656.4	25309.5	679.577	10290.8	0.0655719	1.18328	23983.9	5486.17	-2.1282
480	777.576	53.7011	102956	52111.6	79670.5	93075.7	0.768711	0.114237	77534.8	86374.1	0.155754
481	473.293	51.3039	510339	292951	452291	376919	0.920591	0.0359332	401646	414606	0.0458175
482	375.146	32.0857	4582.46	5371.14	304988	176396	0.0670126	1.17384	4977.8	240693	5.59554
483	542.821	63.5837	48920.2	51512.2	58361.3	64139.6	0.073399	1.13431	50217.2	61251.5	0.286562
484	325.202	41.4479	616151	468544	624706	174735	0.608134	0.216001	542349	399721	-0.440225
485	326.269	45.6772	25156	19501	114070	49480.4	0.208138	0.681648	22329.5	81776.2	1.87273
486	398.161	40.5739	344008	270395	436552	582613	0.131775	0.880166	307203	509583	0.730128
487	950.944	47.6907	166899	110117	108031	122503	0.510788	0.291759	138509	115268	-0.264994
488	485.163	32.8271	33623.8	24730.7	97873.4	70469.2	0.0622754	1.20568	29178.3	84172.3	1.52845
489	186.053	16.8267	30112.9	18831.5	58336.3	146087	0.220934	0.655736	24473.2	102213	2.0623
490	324.136	28.6115	80376.9	319730	104493	66594.6	0.444387	0.352239	200054	85544.8	-1.22564
491	565.256	19.7501	53255.5	64125.7	32173	19508.7	0.058889	1.22997	58691.6	25841.8	-1.18345
492	894.366	37.2817	0	252.815	164904	84711.3	0.0897204	1.04711	127.407	124808	9.93605
493	876.802	63.4325	152547	180377	16664	63715	0.0437989	1.35854	166463	40190.5	-2.05027
494	880.3	34.4356	6700.16	15867.4	206067	61752	0.231975	0.634558	11284.8	133911	3.56882
495	1001.23	28.3026	98911	43257.1	24471.3	47536.5	0.364308	0.438531	71085.1	36004.9	-0.981353
496	513.211	41.0791	372637	262924	188001	81536	0.138987	0.857026	317781	134769	-1.23754
497	393.239	41.4473	731614	437924	383548	112064	0.234022	0.630743	584770	247807	-1.23865
498	743.353	38.2462	53363.2	40247.2	122008	201946	0.104626	0.980362	46806.2	161978	1.79102
499	423.217	48.1481	258198	115383	150414	78009.5	0.460329	0.336932	186792	114213	-0.709709
500	961.269	60.1983	393786	362277	290268	127433	0.178154	0.749203	378032	208851	-0.856032
501	1370.4	28.2994	171245	136922	129231	48496.9	0.275414	0.560015	154085	88865.2	-0.794033
502	838.319	42.9364	909.148	309.907	9674.41	5767.9	0.0692832	1.15937	610.528	7722.16	3.66088
503	557.122	42.0041	78125.5	73415.7	23124.8	36882.7	0.0243217	1.61401	75771.6	30004.7	-1.33647
504	480.85	63.5606	34675.6	30968.2	26276.6	26000.7	0.0694005	1.15864	32822.9	26139.7	-0.328462
505	391.177	20.2549	12223.9	9002.91	51037.1	6248.02	0.506239	0.295644	10614.4	28643.6	1.43219
506	205.987	63.3011	25102.6	24949.3	25822.9	25190.1	0.277881	0.556142	25026.9	25507.5	0.0274385
507	260.09	24.2157	108960	86960.8	49701.5	27157.9	0.0634072	1.19786	97961.3	38430.7	-1.34995
508	1143.36	34.3244	0	0	4576.33	4266.49	0.00122542	2.91171	1	4422.41	12.1106
509	1007.38	34.3578	0	0	63750.3	44411.5	0.0305122	1.51553	1	54081.9	15.7229
510	1094.91	36.4815	0	0	27760	13272.9	0.105323	0.977475	1	20517.4	14.3246
511	827.311	36.5034	0	688.117	121831	37074.8	0.202921	0.692674	345.059	79453.8	7.84713
512	714.337	32.2325	31684.7	22627.1	32720	20986.3	0.971125	0.0127247	27156.9	26854.1	-0.016175
513	569.147	34.501	958.76	3466.26	56175.2	67069.2	0.00873571	2.0587	2213.51	61623.2	4.79907
514	938.509	48.0273	130672	28205.9	65706.4	10357.4	0.550771	0.259029	79439.7	38032.9	-1.06261
515	770.372	36.4924	97475.9	93480.8	3784.15	32158.2	0.0325112	1.48797	95479.3	17972.2	-2.40943
516	949.485	48.6638	123350	271722	109153	56292.4	0.282224	0.549407	197537	82723.5	-1.25576
517	468.165	37.2597	1.59171e+06	1.64763e+06	5.45095e+06	4.53664e+06	0.0179317	1.74638	1.61967e+06	4.99379e+06	1.62443
518	950.489	48.6638	82826.1	173275	69316.6	33644.9	0.255925	0.591887	128051	51481.8	-1.31459
519	893.364	37.2829	0	0	694121	344056	0.097375	1.01155	1	519089	18.9856
520	1008.38	34.3564	0	0	36125.1	24318.3	0.0361028	1.44246	1	30222.7	14.8833
521	727.268	48.5524	81563	85478.7	172925	190182	0.00804737	2.09435	83521.8	181555	1.12018
522	119.047	16.8151	6663.33	2043.62	10678.1	24764.6	0.21309	0.671436	4354.48	17722.3	2.025
523	796.979	64.0636	22026	21341.4	16417.3	17922	0.0319308	1.49579	21684.7	17170.6	-0.336733
524	1063.57	46.5724	59763.1	40992.3	44142.6	55224.6	0.955014	0.0199904	50378.7	49684.6	-0.0200152
525	469.168	37.2597	414062	438097	1.47436e+06	1.23153e+06	0.0168905	1.77236	426080	1.35294e+06	1.6669
526	892.361	37.2837	0	0	2.22194e+06	1.10422e+06	0.0968033	1.01411	1	1.66308e+06	20.6654
527	799.326	31.8679	365.416	6584.59	27168.3	5970.48	0.35759	0.446615	3476	16570.4	2.2531
528	548.134	36.6721	20102.4	22240.2	17037.9	13933.2	0.0945586	1.0243	21172.3	15486.6	-0.45116
529	891.358	37.2841	0	0	3.98434e+06	1.92775e+06	0.102702	0.98842	1	2.95605e+06	21.4952
530	467.153	34.5025	23908.8	39009.9	422998	471534	0.00371528	2.43001	31460.4	447267	3.82953
531	322.097	19.747	457491	384092	344952	326837	0.153785	0.813086	420792	335895	-0.325098
532	373.256	47.6826	55140.6	33486.9	101810	34152.7	0.573771	0.241262	44314.7	67982.4	0.617375
533	1925.17	34.4863	0	0	0	79598.2	0.42265	0.374019	1	39800.1	15.2805
534	1157.52	39.2341	108579	66919.6	29275.1	14792.7	0.0965728	1.01514	87750.1	22034.9	-1.99361
535	977.33	34.3811	0	0	64906	45752.2	0.0286776	1.54246	1	55330.1	15.7558
536	517.108	36.4794	0	1346.83	248239	241915	0.000174895	3.75722	674.414	245078	8.50539
537	428.173	37.2927	198372	132695	7.15352e+06	4.88487e+06	0.0355882	1.44869	165535	6.01919e+06	5.18437
538	546.107	37.2677	0	2212.99	56104.6	57155.8	0.000486402	3.313	1107.5	56631.2	5.67622
539	879.297	34.4403	13080.6	24230.4	397220	107758	0.247786	0.605923	18656.5	252490	3.75848
540	308.128	19.744	179242	110070	140777	125822	0.778684	0.108639	144657	133300	-0.117956
541	1297.58	48.5504	4910.14	6848.93	71393.4	34138.4	0.128467	0.891209	5880.54	52766.9	3.16561
542	323.936	63.5928	201072	161942	135511	143088	0.168353	0.773779	181508	139301	-0.381832
543	742.299	36.452	29265.8	5086.14	165880	157186	0.007828	2.10635	17177	161534	3.23329
544	327.141	47.8808	46686.2	21391	18078.9	91342.7	0.647082	0.18904	34039.6	54711.8	0.684638
545	884.254	59.1419	1.87961e+06	1.5185e+06	963811	439405	0.0885477	1.05282	1.69906e+06	701609	-1.276
546	117.054	4.02734	53185	34068.5	35732.3	59066.5	0.825831	0.0831088	43627.7	47400.4	0.119654
547	826.307	36.5278	0	965.314	230957	68121.2	0.208623	0.680638	483.657	149540	8.27233
548	1080.45	41.0253	17348.7	7718.57	10624.6	8211.64	0.59435	0.225958	12534.6	9419.11	-0.412256
549	602.447	50.3928	546496	139231	261300	305748	0.799329	0.0972743	342865	283525	-0.274162
550	330.145	21.3642	62654.2	54219.8	19946.9	15879.3	0.0130872	1.88315	58438	17914.1	-1.70581
551	429.176	37.2902	52314.6	35915.4	1.89803e+06	1.34612e+06	0.0292722	1.53354	44116	1.62208e+06	5.2004
552	337.106	44.2662	40295.1	130344	30659.1	71638.6	0.561109	0.250953	85320.5	51149.9	-0.738162
553	969.495	47.6642	157752	78214.8	126072	79827.9	0.774848	0.110784	117985	102951	-0.196642
554	315.171	32.6029	20538.5	18901.7	175667	29284.6	0.375562	0.425319	19721.1	102477	2.37748
555	883.253	59.1392	2.21899e+06	1.77599e+06	1.13103e+06	525430	0.0893657	1.04883	1.99749e+06	828233	-1.27008
556	589.357	49.004	127022	110253	344054	370522	0.0042816	2.36839	118638	357289	1.59052
557	951.491	48.6575	32108.6	66944.4	27533.2	15277.3	0.267207	0.573153	49527.5	21406.3	-1.2102
558	603.45	50.4226	188621	47652.2	89946.7	103184	0.789378	0.102715	118137	96566.4	-0.290873
559	426.927	64.0476	24682.5	22089.2	28765.5	31980.5	0.0773636	1.11146	23386.8	30374	0.37714
560	136.075	16.8267	58523.8	34907.7	176327	364039	0.141996	0.847723	46716.8	270184	2.53193
561	987.337	34.3968	0	0	19206.6	19981	0.000390261	3.40864	1	19594.8	14.2582
562	526.318	48.5541	72860.6	68703.2	253633	159592	0.102022	0.991307	70782.9	206614	1.54546
563	574.291	47.9326	1872.49	1557.97	1179.85	16490.8	0.450604	0.346205	1716.23	8836.32	2.3642
564	752.379	50.0784	16640.7	20656	24581	17052.9	0.661728	0.17932	18649.3	20818	0.158705
565	592.262	19.7475	102288	94029.5	100930	79367.8	0.559575	0.252142	98159.6	90150.1	-0.1228
566	596.192	46.3054	94340.6	81560.3	111313	98713.9	0.197585	0.704245	87951.4	105014	0.255807
567	470.17	37.2721	85003.5	80386	248363	209393	0.0175432	1.75589	82695.8	228879	1.4687
568	884.319	37.4264	63390.6	87240.5	172240	15984.5	0.834156	0.0787528	75316.6	94113.1	0.321427
569	729.284	49.0059	4918.26	7754.97	25089	48212.6	0.121355	0.915941	6337.62	36651.8	2.53187
570	778.179	34.4064	0	0	50393.5	14459.5	0.212871	0.671883	1	32427.5	14.9849
571	374.036	19.7548	0	10844.6	53066.8	45325.2	0.0223885	1.64997	5423.29	49197	3.18133
572	448.189	37.2902	37687.7	21197.5	1.07654e+06	741039	0.0345976	1.46095	29443.6	908790	4.94792
573	289.178	48.4883	432449	12760.9	21466.8	52253.8	0.470476	0.327463	222606	36861.3	-2.59431
574	968.457	38.2841	217044	190158	66280.2	50804	0.0112412	1.94919	203602	58543.1	-1.79818
575	447.186	37.2903	189519	123806	6.69692e+06	4.61428e+06	0.0340719	1.4676	156663	5.6556e+06	5.17394
576	603.212	46.3029	14285.6	24948.9	66823.7	57136.4	0.0277167	1.55726	19618.2	61981	1.65963
577	1156.52	39.2287	364958	204614	82096.4	45304	0.115025	0.939207	284787	63701.2	-2.16049
578	164.07	16.8267	59727.1	56549.5	692510	1.35375e+06	0.100075	0.999675	58139.3	1.02313e+06	4.13733
579	959.271	60.1992	1.26235e+06	1.15544e+06	919557	391325	0.176367	0.753583	1.2089e+06	655442	-0.883151
580	960.271	60.1988	728039	679384	537110	226512	0.177151	0.751657	703712	381812	-0.882123
581	337.236	49.2082	727236	531969	368116	155913	0.125535	0.901234	629604	262015	-1.26479
582	84.0099	63.3957	44668.5	31433.1	28915	25323.6	0.251925	0.598729	38051.8	27120.3	-0.488591
583	706.312	36.3527	25910.5	11132.4	255977	171514	0.0449978	1.34681	18522.5	213746	3.52855
584	120.081	22.7994	9614.56	8604.43	119134	96285	0.0131861	1.87988	9110.5	107711	3.56349
585	298.288	54.5631	118950	41897.2	40519.7	64474.7	0.560385	0.251513	80424.5	52498.2	-0.615366
586	451.247	52.9505	105547	107931	111332	197232	0.383781	0.415916	106740	154283	0.531479
587	306.122	19.7516	8.20344e+06	7.41659e+06	6.8805e+06	6.11268e+06	0.139442	0.855606	7.81001e+06	6.49659e+06	-0.265642
588	586.339	48.5576	1.60116e+06	1.57523e+06	7.81152e+06	4.84807e+06	0.085344	1.06883	1.5882e+06	6.3298e+06	1.99477
589	1026.39	34.0746	294.353	0	0	0	0.42265	0.374019	148.176	1	-7.21117
590	871.39	44.5211	35335.5	74338.9	20579	21336.5	0.224533	0.648721	54838.2	20958.8	-1.38763
591	478.391	55.8384	134913	180057	169461	175434	0.578612	0.237613	157486	172448	0.130938
592	540.17	35.5463	271328	255212	241015	283194	0.963514	0.0161422	263271	262105	-0.00640219
593	227.955	62.5274	47318.7	27951.6	28434.9	28194.5	0.437386	0.359135	37636.1	28315.7	-0.410517
594	310.238	39.3612	127079	98240.8	95865.7	47917	0.282377	0.549171	112661	71892.3	-0.648077
595	1154.51	39.2341	1.12662e+06	616288	229495	123440	0.116547	0.933498	871458	176469	-2.30402
596	769.369	36.4735	216643	203632	45868.4	97014.4	0.0343429	1.46416	210138	71442.4	-1.55649
597	242.173	16.376	12908.2	9060.63	990245	253345	0.239221	0.621201	10985.4	621796	5.82278
598	184.043	12.4	9631.64	11592.3	21825.7	65031.6	0.268431	0.571167	10613	43429.7	2.03285
599	1155.52	39.2352	888154	494632	180859	99776.7	0.11117	0.954013	691394	140319	-2.3008
600	1025.39	34.0917	0	0	0	804.114	0.42265	0.374019	1	403.057	8.65484
601	248.024	19.2354	3875.26	5153.61	10604.1	4082.52	0.48425	0.31493	4515.43	7344.33	0.701767
602	1018.29	37.4485	0	0	21699.4	16367.9	0.0190568	1.71995	1	19034.6	14.2163
603	1028.44	47.6193	22339.1	6358.91	66733.9	150485	0.157578	0.802504	14350	108611	2.92004
604	962.269	60.196	174372	162491	127687	45806.9	0.187009	0.728139	168433	86747.8	-0.957276
605	957.271	60.1988	1.52712e+06	1.37801e+06	1.09028e+06	466818	0.170195	0.769053	1.45257e+06	778548	-0.899744
606	715.841	47.6824	73740.7	35558.3	66405.5	69669.1	0.557051	0.254105	54650.5	68038.3	0.316112
607	908.259	60.1992	143337	117654	91042.6	15273.7	0.192883	0.714706	130496	53159.1	-1.29562
608	501.136	32.8179	3967.12	3404.24	5935.01	8356.4	0.108459	0.964733	3686.68	7146.7	0.954956
609	958.272	60.1992	1.40701e+06	1.28276e+06	1.0215e+06	434830	0.175983	0.75453	1.34489e+06	728164	-0.885149
610	265.18	44.8864	1.49038e+06	81645.5	730957	83972.7	0.673576	0.171613	786014	407466	-0.947875
611	263.997	19.2334	16562.4	10431.7	24644.9	8083.37	0.776226	0.110012	13498.1	16365.1	0.277871
612	391.931	64.0677	32703.9	27763.8	25048.1	29026	0.419565	0.377201	30234.9	27038	-0.161223
613	87.0453	2.84597	59523.8	40945.7	31114.4	25397	0.152137	0.817764	50235.8	28256.7	-0.83012
614	320.307	40.5822	175631	69626.9	119896	125099	0.998248	0.000761489	122630	122498	-0.00154753
615	1123.57	36.2696	0	0	0	0	#DIV/0!	#DIV/0!	1	1	0
616	1077.44	41.0252	217868	104868	130250	102148	0.51903	0.284807	161369	116200	-0.473757
617	715.339	32.2281	18537.3	11910.7	16751.8	13231.7	0.956268	0.0194205	15225	14992.8	-0.0221778
618	275.08	2.46832	64277.8	44010.6	18868	18564.6	0.0729882	1.13675	54145.2	18717.3	-1.53246
619	216.034	20.7464	2320.8	5440.7	10986.5	11683.6	0.0430332	1.3662	3881.75	11336.1	1.54614
620	1079.45	41.024	54900	27341.8	33200.2	26805.2	0.514203	0.288865	41121.9	30003.7	-0.454765
621	408.143	35.6771	130961	120057	153963	240058	0.241154	0.617705	125510	197011	0.650474
622	712.209	19.7585	0	10425	5037.22	0	0.68744	0.162765	5213.51	2519.61	-1.04906
623	588.345	48.5613	145684	133250	598071	393217	0.0739177	1.13125	139468	495645	1.82937
624	1122.57	36.2727	0	0	0	0	#DIV/0!	#DIV/0!	1	1	0
625	1078.45	41.0252	141201	70163.6	87095.9	65668.8	0.512426	0.290369	105683	76383.3	-0.468417
626	843.36	35.5322	222527	190640	93862.3	131827	0.0633599	1.19819	206585	112846	-0.872383
627	307.189	41.3406	107550	86201.7	122472	38344.5	0.74085	0.13027	96876.6	80409.3	-0.268786
628	693.39	45.8375	59056.3	49636.4	52980.7	19186.1	0.40714	0.390257	54347.4	36084.4	-0.590835
629	986.401	34.3405	0	0	21347.4	9462.39	0.122136	0.913157	1	15405.9	13.9112
630	587.342	48.5576	592871	575673	2.70771e+06	1.73292e+06	0.078471	1.10529	584273	2.22032e+06	1.92605
631	262.108	24.9001	344157	298286	56501.5	46237.2	0.00750016	2.12493	321223	51370.3	-2.64457
632	307.125	19.7475	1.44819e+06	1.31872e+06	1.21892e+06	1.08251e+06	0.131752	0.880242	1.38345e+06	1.15072e+06	-0.265741
633	864.626	53.6698	51705.9	24705.5	44588.3	48716.3	0.599313	0.222346	38206.7	46653.3	0.288153
634	816.4	35.555	0	0	0	2533.46	0.42265	0.374019	1	1267.73	10.308
635	854.394	48.8918	182216	89991.4	319620	81951.4	0.662269	0.178965	136105	200787	0.560946
636	446.184	37.2967	664104	434353	2.50982e+07	1.75312e+07	0.031659	1.4995	549230	2.13147e+07	5.27829
637	1295.57	48.5547	8086.75	16532.5	212419	94651.4	0.139171	0.856451	12310.6	153536	3.6406
638	238.108	24.2298	397772	262289	94870.9	52015.5	0.0688506	1.16209	330031	73444.2	-2.16788
639	320.976	64.0635	22541.5	19086.1	19044.1	19382.2	0.453834	0.343103	20814.8	19214.1	-0.115442
640	949.942	47.6897	47185.5	27041.1	30646.4	18378.4	0.39717	0.401023	37114.3	24513.4	-0.598406
641	426.157	38.4125	213037	99302.1	458751	354441	0.0832549	1.07959	156170	406597	1.38048
642	368.093	19.7515	54683.7	74536.3	131602	132051	0.0211306	1.67509	64611	131827	1.0288
643	872.394	44.5233	21553.5	44617.7	13687.9	12669.9	0.226755	0.644444	33086.6	13179.9	-1.32791
644	1217.56	48.556	7985.74	11104.5	69232.7	32697.9	0.152373	0.817091	9546.14	50966.3	2.41655
645	835.24	59.1375	175593	118813	62590.6	18722.4	0.09714	1.0126	147204	40657.5	-1.85622
646	333.3	54.0331	116623	75473.3	112185	167962	0.331753	0.479185	96049.2	140074	0.544349
647	241.17	16.2847	81343.5	53373.8	5.68083e+06	1.38755e+06	0.24768	0.606108	67359.7	3.5342e+06	5.71335
648	425.367	53.8106	243141	168964	241659	261832	0.356528	0.447906	206053	251747	0.288954
649	985.398	34.3572	0	0	35684.3	15086.4	0.132626	0.87737	1	25386.3	14.6318
650	239.111	26.1931	395622	292969	103648	59226.7	0.042409	1.37254	344296	81438.4	-2.07987
651	289.178	45.6737	178349	167665	1.08755e+06	834833	0.0247931	1.60567	173008	961191	2.47398
652	403.141	31.9089	39948.6	45720.7	454591	299681	0.0497764	1.30298	42835.7	377137	3.1382
653	693.31	49.967	21805.9	12276.1	205857	40142.7	0.329902	0.481615	17042	123001	2.8515
654	853.391	48.8954	331714	164602	569317	146626	0.676678	0.169618	248159	357972	0.528584
655	753.338	36.8646	102257	51195.4	21370.1	9885.69	0.14467	0.83962	76727.3	15628.9	-2.29553
656	395.22	49.2825	23339.2	17905.3	17641.5	70738.2	0.470334	0.327593	20623.3	44190.9	1.09947
657	379.175	30.3433	159282	113322	57340.3	176913	0.792895	0.100785	136303	117127	-0.218739
658	280.118	23.835	618666	485555	118443	85899.4	0.0224117	1.64952	552111	102172	-2.43396
659	795.976	64.0865	143175	128226	95691.7	104388	0.0540757	1.267	135702	100041	-0.439848
660	514.396	50.2475	567114	151335	244573	317544	0.746674	0.126869	359225	281059	-0.354014
661	1108.51	36.2727	0	0	0	0	#DIV/0!	#DIV/0!	1	1	0
662	452.052	19.7475	5216.11	33490.7	120940	107876	0.0258071	1.58826	19354.4	114409	2.56347
663	793.328	39.246	53052.6	36786.2	16778.3	9246.7	0.0706467	1.15091	44920.4	13013.5	-1.78736
664	531.19	55.1552	0	12048.9	6898.76	25163	0.456932	0.340148	6025.45	16031.9	1.4118
665	534.137	34.5107	0	5344.18	84058.7	109176	0.0181717	1.74061	2673.09	96618.3	5.17572
666	1004.39	42.1694	850.001	847.515	85737	91402.5	0.0010412	2.98246	849.758	88570.7	6.70363
667	500.134	32.8275	1734.69	1716.33	10809.8	19223.1	0.0872618	1.05918	1726.51	15017.4	3.12071
668	652.367	36.2238	92732.4	80289.9	242742	134934	0.199973	0.699029	86512.2	188839	1.12618
669	761.221	58.1616	394888	226546	75286.1	48960.2	0.100118	0.999487	310718	62124.2	-2.32238
670	528.121	34.4996	2340.57	5546.1	48797.2	62460.5	0.0179381	1.74622	3944.34	55629.8	3.818
671	1128.52	36.2665	0	0	0	25392.9	0.42265	0.374019	1	12697.4	13.6322
672	908.431	39.1596	33373.6	30751.2	33575.6	27782.1	0.705924	0.151242	32063.4	30679.9	-0.0636368
673	844.362	35.5308	116851	95119.4	45060.3	62851.8	0.0657439	1.18214	105986	53957.1	-0.97399
674	1216.52	46.5754	18703.9	19577.2	24838.9	36197.7	0.183852	0.735531	19141.5	30519.3	0.673014
675	212.018	63.3908	28180.4	22572.6	20343.7	21458	0.257925	0.588506	25377.5	20901.8	-0.279921
676	558.422	50.3256	587191	143067	269676	330326	0.798727	0.0976018	365130	300002	-0.283438
677	666.975	64.0865	63397.6	50919.6	39708.1	43834	0.143997	0.841648	57159.6	41772.1	-0.452457
678	1296.57	48.5535	5842.6	12540.5	164562	69861.7	0.150653	0.822021	9192.53	117213	3.67252
679	947.274	28.2918	106406	91546.2	118939	82238.4	0.942507	0.0257156	98977.2	100590	0.0233122
680	182.063	19.7661	80400.5	62892.6	19826	14492.1	0.0270673	1.56755	71647.6	17160.1	-2.06186
681	834.241	59.1385	335742	230926	127511	49276.2	0.0965227	1.01537	283335	88394.6	-1.68048
682	760.222	58.1604	819935	474645	158002	109341	0.0984995	1.00657	647291	133672	-2.27571
683	109.065	26.1962	595592	445504	145582	86117.1	0.0375559	1.42532	520549	115850	-2.16777
684	998.517	48.0426	231670	117431	317034	33087.5	0.997643	0.00102496	174551	175062	0.00421043
685	290.181	45.665	33467.2	28551.4	195909	153071	0.0218411	1.66072	31010.3	174491	2.49234
686	491.4	50.1877	9514.51	8240.41	60850.9	14243	0.343811	0.46368	8878.46	37547.9	2.08035
687	762.22	58.1588	188227	108552	32354.5	13372.7	0.0919871	1.03627	148390	22864.6	-2.69821
688	575.291	47.9264	2485.53	2999.39	3397.51	21471.8	0.3959	0.402414	2743.46	12435.7	2.18041
689	305.022	19.237	7306.07	8452.37	20530	9138.92	0.348327	0.458013	7880.22	14835.5	0.912743
690	307.955	63.4742	43967	32862.5	23408	21691.5	0.105864	0.975254	38415.8	22550.8	-0.768522
691	498.365	51.7938	116364	114420	607875	669778	0.00348179	2.4582	115393	638827	2.46887
692	964.439	47.6883	44755.7	13632.1	48136	48060.5	0.348404	0.457917	29194.9	48099.3	0.720298
693	811.956	64.0406	19670	18459.6	21016.1	20022.3	0.204386	0.689549	19065.8	20520.2	0.106061
694	386.216	37.9848	143091	90417.9	23571.7	41382.7	0.0937673	1.02795	116756	32478.2	-1.84595
695	467.152	38.4319	1094.43	59146.6	79023.1	65719.8	0.291738	0.535006	30121.5	72372.5	1.26465
696	896.346	31.0784	21303	17537.6	8814.24	0	0.0885693	1.05272	19421.3	4408.12	-2.1394
697	260.09	25.8655	702150	653210	362436	241600	0.0288145	1.54039	677681	302019	-1.16596
698	1128.38	34.4865	0	0	0	0	#DIV/0!	#DIV/0!	1	1	0
699	717.556	54.3484	204367	123604	123341	132761	0.469995	0.327907	163987	128052	-0.35685
700	800.936	64.0476	23840.8	20416.3	15749.1	18712.7	0.163032	0.787727	22129.6	17231.9	-0.360896
701	694.319	49.9755	15704.5	9481	105595	20629.7	0.357422	0.446819	12593.7	63113.2	2.32524
702	458.167	28.6048	14761.9	12055.7	10674.6	18729.9	0.789566	0.102612	13409.8	14703.2	0.132844
703	976.387	42.3938	1720.44	3145.79	69078.5	11298	0.321433	0.49291	2434.12	40189.3	4.04534
704	833.242	59.139	399320	268246	154105	62271.3	0.10616	0.974038	333784	108189	-1.62536
705	233.147	62.6435	551331	411791	227089	281021	0.0932274	1.03046	481562	254056	-0.922577
706	651.366	36.2258	189904	170417	524612	291922	0.189944	0.721374	180161	408268	1.18023
707	406.293	47.2127	23703.3	12541.2	14958.8	37007.2	0.589759	0.229326	18123.2	25984	0.519782
708	537.207	19.9355	1213.01	768.682	704.244	0	0.264747	0.57717	991.846	353.122	-1.48995
709	730.361	36.2702	0	0	675.877	17291.5	0.392587	0.406065	1	8984.71	13.1333
710	404.144	31.9082	1046.41	5726.81	119093	79847.9	0.0397928	1.4002	3387.61	99471.6	4.87594
711	940.459	47.6885	3.55705e+07	3.16966e+07	2.98751e+07	1.89546e+07	0.252552	0.597649	3.36336e+07	2.44148e+07	-0.462143
712	320.289	53.8916	48034.8	31462.7	50720.5	58382.5	0.246357	0.608436	39749.8	54552.5	0.456699
713	377.233	49.0238	49496.3	20690	95473.1	98010.6	0.0508489	1.29372	35094.2	96742.8	1.46292
714	95.0493	18.7558	88425.5	71129.9	31536.6	14915.3	0.0421564	1.37514	79778.7	23227	-1.7802
715	549.245	22.9275	119254	109330	76422.8	46486.9	0.0786975	1.10404	114293	61455.9	-0.895117
716	319.304	40.5822	1.34469e+06	523218	902943	1.01729e+06	0.955437	0.0197979	933956	960117	0.0398554
717	1003.39	42.18	932.805	2200.19	138664	153767	0.00273342	2.56329	1567.5	146216	6.5435
718	759.224	58.1618	1.00296e+06	575563	197125	127456	0.101439	0.993796	789265	162291	-2.28192
719	313.238	47.6986	228127	409169	234931	107363	0.314369	0.50256	318649	171148	-0.896721
720	541.127	56.0806	4802.68	10680.2	0	0	0.118938	0.924679	7742.43	1	-12.9186
721	646.475	50.4687	477473	110350	211279	255671	0.77481	0.110805	293912	233476	-0.332111
722	518.111	36.4907	0	416.948	73725.6	69773	0.000770713	3.11311	209.474	71750.3	8.42007
723	1014.5	48.5938	11794.5	74760.1	36148.8	13313.9	0.635372	0.196972	43278.3	24732.4	-0.807243
724	784.352	36.7652	243080	130056	52665.8	55554	0.143853	0.84208	186569	54110.9	-1.78572
725	633.336	51.7946	3374.35	7064.94	32769.9	32581.2	0.00449837	2.34694	5220.64	32676.5	2.64595
726	537.963	64.0865	54275.8	50458.9	38552.6	43763.3	0.073922	1.13123	52368.4	41158.9	-0.34749
727	683.314	33.0986	6140.51	4321.13	25749.3	41846.3	0.0718373	1.14365	5231.82	33798.8	2.69158
728	699.304	48.5364	16016	16263.1	45625.3	25622.4	0.190768	0.719494	16140.6	35624.8	1.14219
729	978.332	34.3816	0	598.293	22268.4	22644.7	0.000254266	3.59471	300.147	22457.6	6.22539
730	832.241	59.139	482320	330120	186560	77417.6	0.0995068	1.00215	406221	131990	-1.62184
731	318.301	40.545	7.03096e+06	2.6456e+06	4.73436e+06	5.34652e+06	0.935566	0.0289257	4.83828e+06	5.04044e+06	0.0590562
732	690.501	50.5284	394420	93794.3	181752	204621	0.767682	0.114818	244108	193188	-0.337519
733	778.342	39.2255	1.74439e+06	1.00905e+06	396956	261693	0.107281	0.969476	1.37672e+06	329325	-2.06365
734	441.228	47.9131	5.27333e+06	3.03309e+06	3.01866e+06	1.31383e+06	0.293543	0.532328	4.15321e+06	2.16625e+06	-0.939028
735	375.146	33.3724	3311.67	5383.89	85896.8	60811.9	0.0316887	1.4991	4348.78	73355.3	4.07622
736	812.233	58.162	605315	386962	137430	77311.8	0.0753743	1.12278	496140	107372	-2.20813
737	101.008	63.3992	45921.7	37254.1	57147.2	68443.1	0.0966314	1.01488	41588.9	62796.1	0.594477
738	567.243	42.308	594677	401687	135785	87235.1	0.060291	1.21975	498183	111511	-2.15949
739	125.096	28.8563	939978	887102	891447	262593	0.397892	0.400235	913541	577021	-0.662845
740	777.339	39.2309	3.52974e+06	1.99285e+06	777612	490417	0.112676	0.948167	2.76129e+06	634016	-2.12275
741	1037.54	48.556	22851.8	10899.3	29814.4	20705.5	0.380574	0.419561	16876.6	25260.9	0.581885
742	808.295	40.6125	8576.91	4602.14	6182.05	0	0.441563	0.355007	6590.52	3092.03	-1.09184
743	298.097	9.64115	30336	47157.9	7877.73	11293.5	0.0767777	1.11477	38748	9586.62	-2.01503
744	758.223	58.1618	1.34061e+06	768650	274716	176067	0.10376	0.983971	1.05463e+06	225392	-2.22623
745	505.175	54.9971	1346.48	11026.2	14492.6	25773.5	0.201397	0.695947	6187.32	20134.1	1.70225
746	734.527	50.5784	296459	63935.9	126828	150550	0.756415	0.12124	180198	138690	-0.377719
747	1034.29	61.4544	463866	483437	399076	165370	0.244171	0.612305	473653	282224	-0.74699
748	600.47	53.7257	1.13973e+06	656416	818723	984666	0.989973	0.00437663	898072	901696	0.00580884
749	1369.41	28.2911	186787	146373	106783	36631.9	0.143798	0.842247	166581	71708.4	-1.21601
750	778.555	50.585	196668	40769.1	84537.8	92993.4	0.738151	0.131855	118720	88766.6	-0.419469
751	401.143	32.8591	80422.2	53526.9	98916.5	55315.1	0.730411	0.136433	66975.6	77116.8	0.20341
752	649.432	43.4957	84563.8	64003	75831.3	69762.3	0.902402	0.0446002	74284.4	72797.8	-0.0291639
753	219.022	63.3909	1.02338e+06	690506	580382	583756	0.240449	0.618977	856946	582070	-0.558011
754	514.339	51.7926	3536	6076.6	30097.9	39753.4	0.0263885	1.57859	4807.3	34926.7	2.86103
755	221.018	63.3941	163612	111559	90455.6	90121.5	0.210821	0.676085	137587	90289.6	-0.607708
756	180.159	22.4759	104347	84636.5	91200.4	106019	0.770177	0.11341	94492.9	98610.5	0.061536
757	462.178	34.0346	11868.9	8577.25	90375.9	58861.2	0.0555354	1.25543	10224.1	74619.5	2.86758
758	291.194	48.9561	27273.7	6590.11	5507.28	102169	0.533083	0.273205	16932.9	53839.3	1.66883
759	1032.29	61.455	785189	814064	681786	296624	0.24922	0.603418	799627	489206	-0.708885
760	484.155	32.9544	77094.5	62259.2	300863	228372	0.0341823	1.4662	69677.8	264618	1.92514
761	519.114	25.9353	8973.08	654.7	23970.2	6309.85	0.400989	0.396867	4814.89	15141	1.65289
762	1049.31	37.2902	73908.6	2938.16	107471	86030.7	0.256256	0.591326	38424.4	96751.7	1.33227
763	779.345	39.2297	516521	322027	131873	86368.5	0.0899242	1.04612	419275	109122	-1.94196
764	444.167	38.4179	55071.7	26259.3	1.44839e+06	1.05158e+06	0.0260075	1.5849	40666.5	1.24998e+06	4.94192
765	980.479	48.9753	45550	20019.6	8554.19	7188.95	0.190643	0.71978	32785.8	7872.57	-2.05817
766	1130.52	36.2757	0	0	0	4913.17	0.42265	0.374019	1	2457.58	11.263
767	517.114	25.9395	9772.96	3511.83	31425.6	9501.17	0.349167	0.456967	6643.4	20464.4	1.62312
768	905.486	50.0902	12303.3	17188.6	7077.53	5635.06	0.0811058	1.09095	14747	6357.3	-1.21393
769	702.335	31.1147	77837.9	69555.3	36623.9	0	0.0982634	1.00761	73697.6	18312.9	-2.00875
770	1035.29	61.4544	265711	275784	223465	98661	0.221871	0.653899	270748	161064	-0.749316
771	445.17	38.4079	2967.93	1710.25	412789	301776	0.023596	1.62716	2340.09	357284	7.25436
772	444.229	48.9377	102448	57710.9	93941.6	72232.2	0.914773	0.0386864	80080.3	83087.9	0.0531917
773	462.178	31.0883	20900.3	9901.39	206901	104066	0.113527	0.9449	15401.9	155485	3.3356
774	165.091	28.8554	400044	391534	401424	117235	0.438391	0.358139	395790	259330	-0.609944
775	557.446	53.731	406444	246512	301263	354272	0.989181	0.00472441	326479	327768	0.00568521
776	400.14	32.8603	349415	207038	403926	233025	0.752093	0.123728	278227	318477	0.194922
777	611.918	54.2298	23100.5	15545.6	18493.7	23185.3	0.765569	0.116016	19324	20840.5	0.108994
778	373.101	53.8224	47942.4	6024.63	33916.6	33964.6	0.771493	0.112668	26984.5	33941.6	0.330923
779	1041.5	48.012	423974	655732	375206	73824.8	0.239009	0.621585	539854	224516	-1.26575
780	590.122	29.6259	157687	171939	95829.6	43050.9	0.0732349	1.13528	164814	69441.2	-1.24697
781	813.231	58.1592	291820	184598	64280	28285.2	0.0769335	1.11388	238210	46283.6	-2.36366
782	356.127	50.5091	14670.8	23545.7	3068.9	11165.5	0.18401	0.73516	19109.2	7118.2	-1.42468
783	1033.29	61.4546	736442	783542	631292	278398	0.228627	0.640872	759993	454846	-0.740607
784	820.6	53.6824	103385	57800.7	95960.8	107670	0.462312	0.335064	80593.6	101816	0.33723
785	235	63.5771	604133	456915	336358	380296	0.154245	0.811788	530525	358328	-0.566142
786	462.265	47.8489	455801	302180	345652	280874	0.513034	0.289854	378992	313264	-0.274787
787	512.418	53.702	1.46144e+06	895653	1.58747e+06	1.89285e+06	0.222747	0.652189	1.17855e+06	1.74016e+06	0.562211
788	169.049	19.2334	74416.5	49505.2	94948.5	45353.9	0.7957	0.0992508	61961.9	70152.2	0.179108
789	236.129	42.5024	1.84333e+06	1.08381e+06	270843	114855	0.0818199	1.08714	1.46357e+06	192850	-2.92394
790	645.499	53.7195	348083	207740	269383	321203	0.837867	0.0768249	277913	295294	0.0875211
791	424.14	41.7268	54588.1	40771.4	15161	10367.2	0.0411708	1.38541	47680.8	12765.1	-1.90121
792	218.087	63.3941	392898	321531	475487	523681	0.0805694	1.09383	357216	499585	0.483934
793	1368.41	28.295	240457	196256	134945	47466.7	0.121959	0.913785	218357	91207.1	-1.25947
794	424.365	53.8136	868790	562459	809064	985336	0.412205	0.384887	715626	897201	0.326226
795	507.128	25.9438	20424.4	4431.15	20588.2	6815.82	0.914931	0.0386118	12428.8	13703	0.140806
796	1027.45	42.7635	48652.4	55542.8	42746.1	9223.75	0.266534	0.574247	52098.6	25985.9	-1.00351
797	811.233	58.1618	1.21627e+06	749102	280195	161118	0.0871773	1.0596	982685	220658	-2.15492
798	512.107	29.3009	184179	133976	46204.6	24536.3	0.0455337	1.34167	159078	35371.4	-2.16908
799	601.473	53.7257	404063	230273	286909	339978	0.971025	0.0127696	317169	313444	-0.017042
800	189.164	48.9115	252789	163080	14077.9	22766	0.052159	1.28267	207935	18422.9	-3.49656
801	810.235	58.1604	1.4828e+06	925366	342277	191673	0.0832379	1.07968	1.20408e+06	266976	-2.17316
802	1031.29	61.4591	779079	814020	676547	294740	0.2463	0.608536	796551	485645	-0.713865
803	974.812	62.503	60931.2	53869.1	73391.8	53390.9	0.629046	0.201318	57401.2	63392.4	0.14323
804	497.361	51.7955	181735	320231	1.83014e+06	2.04067e+06	0.00554906	2.25578	250984	1.93541e+06	2.94697
805	1107.42	46.3052	49883.5	44433.4	41295.8	23301.9	0.254734	0.593913	47159.5	32299.9	-0.546018
806	768.421	47.9728	38097.2	101302	12156	56294.7	0.454563	0.342406	69700.5	34226.4	-1.02606
807	719.263	42.033	12074.9	11559	51889.6	22176.7	0.231777	0.634929	11818	37034.1	1.64787
808	1129.52	36.2702	0	0	0	17906.2	0.42265	0.374019	1	8954.11	13.1283
809	518.114	25.9346	17620.6	3694.91	38102.3	10149.7	0.4793	0.319393	10658.8	24127	1.17861
810	336.311	53.8876	533788	365641	523882	629028	0.329478	0.482173	449716	576456	0.358198
811	939.232	28.292	459628	255858	135583	110040	0.149381	0.825705	357744	122812	-1.54247
812	797.98	64.0802	46549.3	39580	31933.7	34528.5	0.118166	0.927509	43065.6	33232.1	-0.373961
813	270.139	34.1778	11841.1	28352.8	36848.2	9555.81	0.863624	0.0636754	20097.9	23203	0.207263
814	216.147	28.8543	138915	141598	144337	42583.9	0.454912	0.342073	140258	93461.6	-0.585636
815	530.136	37.2677	1276.71	2354.66	86420.4	92420.3	0.00120832	2.91782	1816.69	89421.4	5.62124
816	363.312	53.8916	448212	266192	414270	502819	0.422136	0.374548	357203	458546	0.360323
817	270.207	27.2221	241344	193146	306634	124303	0.986678	0.00582468	217246	215469	-0.0118477
818	978.468	48.9377	48448.7	32728.1	24190.9	37036.8	0.42939	0.367148	40589.4	30614.9	-0.406872
819	633.305	36.5238	14181.6	12047	148891	53906.6	0.204207	0.68993	13115.3	101400	2.95073
820	348.039	63.4553	6258.47	7056.98	10376	12672.4	0.0571035	1.24334	6658.73	11525.2	0.791476
821	220.025	1.95351	13830.4	24001	8662.82	11488.4	0.23593	0.627218	18916.7	10076.6	-0.908653
822	809.234	58.1618	1.93074e+06	1.18965e+06	436075	247434	0.0859702	1.06565	1.5602e+06	341755	-2.19069
823	926.328	19.7476	34873.4	56156.7	12601.6	5041.39	0.0830865	1.08047	45516	8822.47	-2.36712
824	497.194	48.1295	144353	80147.9	119214	69165.6	0.700634	0.154509	112252	94190.7	-0.25308
825	411.235	49.257	1.40347e+06	450990	354956	218022	0.314444	0.502456	927231	286490	-1.69444
826	730.291	48.9914	54409	59950.3	6987.36	10549	0.00459665	2.33756	57180.6	8769.16	-2.70502
827	314.146	38.5068	232572	88536.1	116088	61962.9	0.450663	0.346148	160555	89026.7	-0.850757
828	381.341	53.8887	358412	213423	342633	396939	0.391865	0.406864	285918	369787	0.371091
829	337.153	32.6036	43287.8	31433.9	146733	33433.9	0.452357	0.344519	37361.8	90084.6	1.26972
830	380.338	53.8916	1.64557e+06	937704	1.49443e+06	1.79774e+06	0.454481	0.342484	1.29164e+06	1.64609e+06	0.349838
831	477.248	45.4002	597384	222545	296396	71794.4	0.409867	0.387357	409965	184096	-1.15504
832	484.138	37.2807	32328.8	28731.6	180047	166381	0.00244322	2.61204	30531.2	173215	2.50421
833	628.5	54.3761	952413	574262	577528	623421	0.482587	0.316424	763339	600475	-0.346218
834	319.285	53.8876	237056	162949	236911	294666	0.296379	0.528153	200004	265790	0.410258
835	248.129	23.7307	107343	75264.6	14352	7723.26	0.039204	1.40667	91305	11038.6	-3.04814
836	794.285	36.3686	0	0	401140	131884	0.186305	0.729776	1	266513	18.0238
837	556.443	53.7269	1.25166e+06	740877	909656	1.08882e+06	0.992236	0.00338502	996268	999240	0.004297
838	748.543	52.0057	618364	166395	256875	289770	0.651715	0.185942	392381	273324	-0.521645
839	1215.52	46.5825	24265.5	27147.3	32549	44425.2	0.171585	0.76552	25707.4	38488.1	0.58223
840	793.572	52.0243	187327	49527.5	78958	84439.3	0.64753	0.18874	118428	81699.7	-0.535611
841	795.287	36.3549	14395	9218.77	206553	83489.3	0.163015	0.787773	11807.9	145022	3.61845
842	1137.25	25.9469	18880.2	5069.02	28549.5	5005.22	0.758532	0.120026	11975.6	16778.4	0.486505
843	893.549	38.5381	28261	20628.8	0	0	0.0235142	1.62867	24445.9	1	-14.5773
844	948.941	47.6887	137647	102102	105552	82006.1	0.345537	0.461505	119875	93779.9	-0.354185
845	1030.54	49.0707	130802	97458.3	131762	83877.9	0.848829	0.0711796	114131	107821	-0.0820492
846	1028.45	42.761	32250.5	37243.7	28354.8	6222.82	0.263677	0.578928	34748.1	17289.8	-1.00701
847	520.938	64.0676	28102.7	23559.6	17184.7	21698	0.184107	0.734931	25832.1	19442.4	-0.409963
848	430.178	37.295	4807.5	7102.06	322229	228915	0.0286814	1.5424	5955.78	275573	5.532
849	1022.28	28.2879	318514	271989	426422	450808	0.0319615	1.49537	295252	438616	0.57101
850	561.521	61.5473	139321	106439	62893.7	75350.8	0.0923763	1.03444	122881	69123.2	-0.830024
851	1014.47	44.4533	230841	417927	104706	37365.9	0.125623	0.900932	324385	71037	-2.19107
852	273.147	31.5763	3.34825e+06	2.60033e+06	2.21421e+06	191794	0.242115	0.615979	2.97429e+06	1.203e+06	-1.3059
853	936.503	48.0767	987778	246556	663085	84320.4	0.656193	0.182969	617168	373704	-0.723768
854	937.505	48.0688	273149	69534.9	187697	25102.9	0.667578	0.175498	171343	106401	-0.687371
855	322.142	47.9287	1068.11	6722.73	3990.42	55561.4	0.423534	0.373112	3896.42	29776.9	2.93397
856	834.616	54.0063	245808	120118	123175	130827	0.467869	0.329876	182964	127002	-0.526713
857	309.234	25.7777	61206.1	18685.4	2.06358e+06	241825	0.346401	0.460421	39946.7	1.1527e+06	4.8508
858	254.101	23.3325	16051.3	10074.3	13696.1	36472.2	0.414637	0.382332	13063.8	25085.1	0.94126
859	836.239	59.1392	84900.2	57256.4	23142.4	0	0.0807969	1.09261	71079.3	11572.2	-2.61876
860	511.307	49.0182	299548	265197	835874	928648	0.00673055	2.17195	282374	882262	1.6436
861	559.359	37.9064	252062	183181	179519	88154.8	0.280648	0.551839	217622	133838	-0.701343
862	1032.55	49.0798	31984	22835.2	35661.8	21782.4	0.889033	0.0510822	27410.6	28723.1	0.067476
863	1013.46	44.455	356273	665837	164787	56151.5	0.134634	0.870845	511056	110470	-2.20983
864	1015.47	44.455	85579.4	155541	40551.9	14199	0.130214	0.885342	120561	27376.4	-2.13876
865	214.253	41.0317	100460	45000.3	29558.4	55196.9	0.425141	0.371467	72731.1	42378.7	-0.779233
866	492.128	37.8216	80837.5	33263.7	14743.9	58835.2	0.595922	0.224811	57051.6	36790.5	-0.632934
867	644.496	53.7178	941037	533256	717971	844755	0.855114	0.0679762	737148	781364	0.0840414
868	816.294	32.9898	32754.9	27190.7	63558.3	26161.4	0.513498	0.289461	29973.8	44860.8	0.581755
869	792.569	52.0217	410914	108694	173845	183253	0.644747	0.190611	259805	178550	-0.541103
870	395.355	54.0595	217876	137440	202278	239034	0.433418	0.363093	177659	220657	0.312692
871	392.148	36.7216	27278.7	15089.9	38552.5	91118.3	0.24709	0.607144	21185.3	64836.4	1.61374
872	716.553	54.3549	461752	293624	295855	318483	0.493213	0.306966	377689	307170	-0.298162
873	207.066	32.8639	94662.6	60896.4	119330	71278.3	0.611205	0.213813	77780.5	95305.1	0.293145
874	1051.65	50.6961	8099.7	7581.42	9105.06	6578.74	0.999264	0.00031963	7841.56	7842.9	0.00024681
875	325.11	32.8614	64952.1	49807.6	89322.3	53554.9	0.544347	0.264124	57380.8	71439.6	0.316155
876	653.371	36.2218	2549.6	0	61120.7	21933.8	0.17686	0.75237	1275.8	41528.3	5.02462
877	522.211	25.0828	13419.3	12007	26809.2	12863.3	0.416412	0.380477	12714.2	19837.3	0.641778
878	315.154	35.5377	464725	320581	259667	193525	0.171278	0.766299	392654	226597	-0.793128
879	147.043	64.0865	160449	121598	86039.5	93491.1	0.122202	0.912923	141024	89766.3	-0.6517
880	512.31	49.0161	116834	100670	297447	323793	0.00581027	2.2358	108753	310621	1.5141
881	815.291	33.0045	70424.7	55794.5	125998	51162.5	0.572868	0.241946	63110.6	88581.3	0.48912
882	672.527	54.3648	705788	453804	445356	490921	0.475117	0.323199	579797	468139	-0.308609
883	560.518	61.5412	392550	297155	203194	229729	0.122058	0.913433	344853	216462	-0.671868
884	791.593	54.0162	209819	105320	105631	115169	0.463516	0.333935	157571	110401	-0.513242
885	513.421	53.6894	456950	314748	507723	621695	0.188644	0.724356	385850	564710	0.54947
886	1031.54	49.0721	86547.6	65237	92337.7	57198.8	0.96135	0.0171187	75893.3	74769.3	-0.0215264
887	310.916	2.1534	12993	63782.7	12402	31259.5	0.603272	0.219487	38388.8	21831.7	-0.814259
888	215.143	28.857	823805	760792	824972	243880	0.470653	0.3273	792300	534427	-0.568054
889	808.264	36.5006	0	0	601.408	399.609	0.0383194	1.41658	1	501.508	8.97013
890	369.117	32.8611	386716	250637	522808	310562	0.518247	0.285463	318678	416686	0.386865
891	535.14	34.5097	293.325	1626.06	19328.1	38045.2	0.0979639	1.00893	960.69	28687.7	4.90022
892	877.806	63.4238	91952.9	106927	9710.39	15864.5	0.00861376	2.06481	99440.9	12788.4	-2.959
893	1212.6	35.5355	0	0	0	0	#DIV/0!	#DIV/0!	1	1	0
894	862.415	45.0742	7628.33	13582.2	29737.3	17007.5	0.210864	0.675998	10606.2	23373.4	1.13995
895	1029.44	47.6302	16264.8	3027.16	48312.2	115304	0.168898	0.772375	9647	81809.1	3.08411
896	293.127	22.4479	71171.6	117079	175530	70043	0.667696	0.175421	94126.4	122787	0.383491
897	688.201	57.3404	290156	145444	14742.2	16078.5	0.107586	0.968243	217801	15411.4	-3.82095
898	602.209	46.3029	117074	117698	180466	168205	0.0114188	1.94238	117387	174337	0.570604
899	526.272	39.1151	443817	299827	333869	216367	0.40731	0.390075	371823	275119	-0.434561
900	1106.31	62.9769	486184	437966	311677	163928	0.102015	0.991336	462076	237804	-0.95836
901	796.29	36.3526	0	449.624	70838.7	15324.8	0.262589	0.580723	225.812	43082.7	7.57584
902	763.216	58.1583	71720	38561.7	0	0	0.0797388	1.09833	55141.9	1	-15.7509
903	780.348	39.2309	130291	85751.9	36045.8	23572.8	0.0774146	1.11118	108023	29810.3	-1.85745
904	673.53	54.3595	296167	185416	179172	187368	0.409071	0.388202	240792	183271	-0.39381
905	732.548	53.7035	442260	228492	339419	396108	0.797198	0.0984341	335377	367765	0.132999
906	468.39	53.7157	1.0892e+06	730944	888301	1.05749e+06	0.781188	0.107244	910073	972896	0.0963036
907	876.308	39.4585	0	5467.41	19657.3	13503.4	0.0781405	1.10712	2734.71	16581.4	2.6001
908	324.161	35.638	366180	247883	61095.9	50852.3	0.05163	1.2871	307032	55975.1	-2.45553
909	238.108	25.8641	3.13782e+06	2.1984e+06	703485	410128	0.0502613	1.29877	2.66811e+06	556808	-2.26057
910	229.017	1.95076	51308.1	281159	52603.1	64529.9	0.448253	0.348476	166234	58567.5	-1.50505
911	1006.39	42.1259	702.251	255.746	10757.4	7845.3	0.026765	1.57243	479.999	9302.36	4.2765
912	704.517	51.9861	840252	230217	332191	385995	0.623217	0.205361	535235	359094	-0.575811
913	947.937	47.6886	374298	260334	277271	212806	0.384636	0.41495	317317	245040	-0.372912
914	446.887	62.7081	0	2103.01	19861.9	13929.5	0.0372611	1.42874	1052.5	16896.7	4.00485
915	288.166	44.8698	48609.5	46943.2	81300.1	11569.8	0.972814	0.0119704	47777.3	46436	-0.0410833
916	904.379	42.3084	2027.49	1380.18	807.968	12775.4	0.485276	0.314012	1704.83	6792.67	1.99435
917	631.289	36.508	647.506	1073.1	84020	16845.8	0.277962	0.556014	861.302	50433.9	5.87173
918	499.367	51.8028	50472.2	126207	135431	146196	0.303702	0.517552	88340.5	140814	0.672648
919	705.52	51.9897	335497	92799.5	132734	152656	0.616724	0.209909	214149	142696	-0.585668
920	687.203	57.3399	642639	320486	45740.7	53347.3	0.115489	0.937459	481563	49545	-3.28091
921	89.0602	22.4727	47630.4	33677.4	30806	37672.3	0.496111	0.304422	40654.9	34240.2	-0.24774
922	1021.28	28.292	627300	521880	828169	876614	0.0409444	1.38781	574591	852392	0.568982
923	1033.22	25.9438	3922.25	2803.32	30501.5	6002.42	0.348578	0.4577	3363.78	18253	2.43997
924	274.016	19.1886	1359.58	1562.18	2198.59	5556.62	0.287325	0.541627	1461.88	3878.61	1.40771
925	836.595	52.0403	206633	53752	85941.4	90326.3	0.637544	0.19549	130194	88134.8	-0.562874
926	1107.31	62.9769	484082	433169	309839	162069	0.104259	0.981885	458626	235955	-0.958808
927	278.175	39.5613	643159	496890	476646	253058	0.264367	0.577793	570026	364853	-0.643714
928	469.392	53.7263	314240	203817	254095	311432	0.739531	0.131043	259029	282765	0.126485
929	486.329	51.3138	101426	69046.4	165662	129726	0.12291	0.910413	85237.1	147695	0.793067
930	685.204	57.3418	1.86264e+06	917326	140757	165772	0.120346	0.919569	1.38998e+06	153266	-3.18096
931	1105.31	62.9769	448254	406969	288342	148176	0.103265	0.986048	427612	218260	-0.970256
932	688.522	53.7103	638166	379132	552080	637438	0.592292	0.227464	508650	594760	0.225634
933	863.417	45.0775	6855.39	9366.22	15667.4	10509.4	0.22481	0.648185	8111.8	13089.4	0.690304
934	466.15	38.4376	4337.92	2860.59	283731	255850	0.00273906	2.5624	3600.25	269792	6.2276
935	892.546	38.5289	51444.3	40847.8	0	693.729	0.0131754	1.88024	46147.1	347.865	-7.05157
936	493.179	47.1036	95135.3	78208.1	14999.5	55768.7	0.14577	0.836332	86672.7	35385.1	-1.29244
937	1109.31	62.9798	186007	174317	123855	65276.9	0.103237	0.986166	180163	94566.8	-0.929897
938	1108.31	62.981	319819	284751	201469	105552	0.100377	0.998364	302286	153512	-0.977569
939	1139.25	25.941	21235.4	9891.11	32197.3	6503.95	0.812674	0.0900835	15564.3	19351.6	0.314215
940	1035.22	25.9353	5423.58	4614	37522.9	6403.93	0.390009	0.408926	5019.79	21964.4	2.12947
941	414.972	64.0556	39427.1	33124.6	21423.9	21911.9	0.0437646	1.35888	36276.9	21668.9	-0.743424
942	606.089	29.6294	27920.5	29558.8	18635.3	9821.35	0.0836205	1.07769	28740.6	14229.3	-1.01423
943	760.376	28.535	9591.64	13240.7	1315.96	1599.49	0.0321508	1.49281	11417.2	1458.73	-2.96843
944	553.29	50.6937	39908.8	29453.3	33356.9	30100.2	0.643732	0.191295	34682.1	31729.6	-0.128362
945	1015.27	28.3013	536028	445802	238659	165129	0.0382348	1.41754	490916	201895	-1.28187
946	514.874	62.6836	0	0	6202.63	2023.41	0.187883	0.726112	1	4114.02	12.0063
947	368.114	32.8656	1.76714e+06	1.10123e+06	2.41479e+06	1.36758e+06	0.538101	0.269137	1.43419e+06	1.89118e+06	0.399056
948	462.408	57.2766	434603	321521	274985	300835	0.260333	0.58447	378063	287911	-0.393004
949	371.991	64.0595	44502.4	42400.9	26166.5	28916.7	0.0116262	1.93456	43452.7	27542.6	-0.657778
950	515.115	25.9395	10276.7	2980.13	20707.5	5534.69	0.521201	0.282995	6629.43	13122.1	0.985041
951	1016.47	44.4533	28555.2	44333.2	14050.3	4677.82	0.0981938	1.00792	36445.2	9365.07	-1.96037
952	384.065	19.7526	11133.6	67423.2	216677	193930	0.0318426	1.49699	39279.4	205305	2.38592
953	253.098	23.3325	20593.9	17554.6	57627	203304	0.265883	0.575309	19075.2	130467	2.77391
954	1098.57	47.7936	13124.6	6423.13	29206.6	27407.1	0.0333039	1.4775	9774.86	28307.9	1.53406
955	965.481	48.7256	122202	171113	98334.2	42862.8	0.175976	0.754546	146659	70599.5	-1.05473
956	1083.41	29.187	45243.9	35629.7	0	44750.7	0.512697	0.290139	40437.8	22376.4	-0.853729
957	555.178	53.8302	89457.9	18517.5	63187.7	66174.8	0.791683	0.101448	53988.7	64682.3	0.260712
958	509.291	48.5573	1.31026e+06	1.33312e+06	6.58835e+06	4.22193e+06	0.074683	1.12678	1.32169e+06	5.40514e+06	2.03194
959	970.497	47.6642	102171	39162.2	82632.9	50305.5	0.916469	0.0378824	70667.8	66470.2	-0.0883451
960	483.231	47.8856	1.65895e+06	1.08841e+06	1.27779e+06	1.37014e+06	0.879251	0.0558873	1.37368e+06	1.32397e+06	-0.0531776
961	686.203	57.3404	1.45559e+06	707796	104505	127044	0.122924	0.910363	1.08169e+06	115775	-3.22389
962	287.162	44.8781	244729	258744	418382	49297.1	0.931635	0.0307542	251738	233841	-0.106394
963	207.134	22.3018	328608	190025	125199	48299	0.161335	0.792273	259317	86749.9	-1.57978
964	925.33	19.7501	44940.9	64835.3	26710	16149.4	0.097077	1.01288	54889.1	21430.7	-1.35684
965	480.237	44.4002	592119	311608	102609	50380.5	0.119175	0.923814	451864	76495.9	-2.56244
966	343.217	38.0436	81388.4	57994.2	194526	275102	0.058904	1.22986	69692.3	234815	1.75245
967	684.204	57.3404	2.87939e+06	1.3941e+06	215735	254923	0.124729	0.904034	2.13674e+06	235330	-3.18266
968	328.13	18.9691	98997.8	69072.3	78746.9	51823.1	0.4499	0.346884	84036.1	65286	-0.364236
969	370.208	47.1963	27297.9	21686.3	24430.9	49657.7	0.433813	0.362697	24493.1	37045.3	0.596917
970	629.504	54.3775	352376	212824	209429	236354	0.489222	0.310494	282601	222893	-0.342419
971	959.965	63.5991	37041.1	27843.5	33286.1	39564.1	0.548653	0.260702	32443.3	36426.1	0.167052
972	498.091	22.9303	82877.8	89408.6	64190.6	44988.2	0.0896257	1.04757	86144.2	54590.4	-0.658107
973	1039.53	42.3781	61107.2	54294.7	104524	195500	0.180319	0.743959	57701.9	150013	1.37839
974	410.206	47.6709	1.79768e+06	841339	725482	606236	0.307778	0.511762	1.31951e+06	665860	-0.986712
975	743.396	49.9934	67394	69494.2	35081.3	85119.2	0.770666	0.113134	68445.1	60101.2	-0.187552
976	344.316	49.1864	60002	57397	91570.8	96112.8	0.00550423	2.2593	58700.5	93842.8	0.676873
977	837.598	52.073	101316	23519.1	40143.6	42135.6	0.639353	0.194259	62418.5	41140.6	-0.60141
978	1002.53	49.0312	1756.86	2425.38	2865.41	4117.46	0.187202	0.727688	2092.12	3492.44	0.739266
979	333.109	28.2834	185198	105286	49547.8	8020.09	0.122606	0.91149	145243	28785	-2.33508
980	617.354	50.3632	67659.1	51854.9	62329.5	69503.5	0.551438	0.258504	59758	65917.5	0.14153
981	463.411	57.2766	121871	95805.7	77731.9	84020.6	0.172328	0.763645	108840	80877.3	-0.428397
982	262.108	27.3702	738029	790463	152529	153778	0.00183658	2.73599	764247	153155	-2.31905
983	309.126	31.7619	9539.05	9945.87	249604	78855.4	0.212086	0.673487	9743.46	164231	4.07515
984	530.134	33.3985	11139.2	13759.9	21562.5	10528.9	0.590806	0.228555	12450.6	16046.7	0.366068
985	696.433	53.9671	78266.5	55458	67066.4	72416.9	0.828752	0.0815754	66863.3	69742.7	0.0608278
986	971.433	47.6627	73177.7	30724.1	57338.1	53728.9	0.881916	0.0545725	51951.9	55534.5	0.0962087
987	510.294	48.5576	445724	466000	2.14061e+06	1.38074e+06	0.0753795	1.12275	455863	1.76068e+06	1.94946
988	107.07	22.4768	91673.5	69532.5	70295.2	87040.4	0.901889	0.0448467	80604	78668.8	-0.0350596
989	610.81	63.5759	27190.5	26114.5	23876.9	21602.6	0.0896841	1.04728	26653.5	22740.8	-0.229045
990	902.814	63.4288	66449.9	93187.2	10884.5	56859	0.226158	0.645588	79819.5	33872.8	-1.23662
991	268.191	28.8685	2.00826e+07	1.03397e+07	1.02856e+07	2.6313e+06	0.293232	0.532788	1.52111e+07	6.45845e+06	-1.23587
992	272.156	28.4223	1.95868e+06	1.32198e+06	1.14896e+06	664845	0.208104	0.681719	1.64033e+06	906902	-0.854969
993	635.319	36.5793	0	470.139	56093.9	22002.2	0.150536	0.82236	236.07	39049.1	7.36993
994	568.246	42.3026	245894	162713	35581.1	18566	0.0528657	1.27683	204304	27074.5	-2.91571
995	661.494	51.9688	393300	113276	154064	177400	0.596756	0.224203	253289	165733	-0.611925
996	776.574	53.6982	200928	120738	178818	211007	0.512889	0.289977	160834	194913	0.277258
997	736.215	57.3404	568483	298775	46783.6	37507.7	0.101103	0.995236	433630	42146.6	-3.36298
998	174.052	6.70224	54381.8	41030	51037.9	202733	0.407592	0.389774	47706.9	126886	1.41127
999	273.032	20.7427	2896.92	9069	26782.8	28693.9	0.0213477	1.67065	5983.96	27739.3	2.21276
1000	456.839	53.2218	97185.2	18971.6	46332.9	51673.6	0.838441	0.0765276	58079.4	49004.3	-0.245119
1001	737.214	57.3404	438941	228544	29778.8	26927.1	0.101019	0.995598	333743	28353.9	-3.55712
1002	336.099	28.2886	147831	98171.5	57572.5	49419.8	0.109875	0.9591	123002	53497.2	-1.20115
1003	673.348	36.2412	58700.5	57638.3	264139	166075	0.0853149	1.06898	58170.4	215108	1.8867
1004	509.127	25.9399	41282.9	22131.2	36603.7	10179.7	0.660995	0.179802	31708	23392.7	-0.438789
1005	341.263	29.1877	352678	178055	65316.1	223063	0.41132	0.38582	265368	144190	-0.880017
1006	927.468	50.0897	13366.5	10382	8250.04	10342.8	0.292849	0.533356	11875.3	9297.44	-0.353055
1007	774.363	28.5378	0	1244.42	576.564	2952.8	0.484031	0.315127	623.212	1765.68	1.50243
1008	416.391	55.5976	126932	171201	118717	114618	0.282314	0.549268	149067	116668	-0.353554
1009	1163.63	49.004	0	211.135	59481.4	21115.9	0.171138	0.766653	106.567	40299.6	8.56286
1010	280.244	47.0922	135367	158599	53825.5	58752.5	0.0167144	1.77691	146984	56290	-1.38471
1011	540.448	54.3977	1.20896e+06	755730	739518	812936	0.464019	0.333465	982347	776228	-0.339753
1012	682.347	39.2106	1128.22	13238.9	39132.1	45584.2	0.0360055	1.44363	7184.57	42359.2	2.5597
1013	508.15	36.2443	46539.3	44054.6	25311.2	85851.2	0.766593	0.115435	45298	55582.2	0.295176
1014	226.951	62.5099	1.6615e+06	1.25675e+06	1.22306e+06	1.19188e+06	0.340764	0.467546	1.45913e+06	1.20747e+06	-0.273118
1015	1218.49	33.0457	87967.1	63461.1	30459.5	7364.3	0.0777522	1.10929	75715.1	18912.9	-2.00121
1016	1164.63	49.0062	257.133	0	13948.6	16004.4	0.00483211	2.31586	129.567	14977.5	6.85296
1017	660.49	51.9688	1.07806e+06	299363	410153	474713	0.59287	0.227041	688714	442434	-0.638444
1018	1055.3	62.997	72343.6	67802.7	56110.2	12885.7	0.243266	0.613919	70074.2	34499	-1.02233
1019	385.068	19.7533	0	0	42957	44110	0.000175329	3.75615	1	43534.5	15.4099
1020	1119.39	48.1325	50768.4	18605.5	45099.3	30878.9	0.86836	0.0613	34688	37990.1	0.131188
1021	720.318	33.1074	10446.6	12892.5	13718.2	68219.1	0.395169	0.403217	11670.6	40969.6	1.81168
1022	334.868	63.5488	26642.1	21567	19681.8	21668	0.335182	0.47472	24105.6	20675.9	-0.221417
1023	819.358	47.7829	36536.6	20814.3	31442.3	47788.1	0.436475	0.36004	28676.4	39616.2	0.466224
1024	733.55	53.7135	192221	105400	144569	170343	0.866212	0.0623758	148811	157457	0.0814723
1025	431.181	37.2807	1191.52	1080.5	39708.2	29846.6	0.0208168	1.68159	1137.01	34778.4	4.93487
1026	524.306	34.1785	1.26099e+06	1.03994e+06	937729	218557	0.267568	0.572565	1.15047e+06	578144	-0.992721
1027	314.945	64.0769	21052.1	22178.6	26223.1	27547.2	0.0261449	1.58261	21616.4	26886.1	0.314739
1028	616.351	50.3614	142237	113007	143163	158170	0.295792	0.529014	127623	150668	0.239478
1029	325.117	6.69956	6099.68	6389.9	8505.08	33310.1	0.358647	0.445333	6245.79	20908.6	1.74314
1030	1054.3	63.0039	67496.3	67715.6	53749.5	13251.6	0.234164	0.630479	67606.9	33501.5	-1.01295
1031	689.198	57.337	99993.4	44145.2	0	0	0.123027	0.909998	72070.3	1	-16.1371
1032	616.35	47.8063	406008	287014	391077	505704	0.342763	0.465006	346512	448392	0.371854
1033	1040.53	42.3781	39983	38478.1	69725.4	130170	0.182366	0.739055	39231.6	99948.7	1.34917
1034	548.195	32.023	2629.43	2923.88	27080.6	7130.92	0.28742	0.541484	2777.66	17106.8	2.62263
1035	477.269	48.0893	1.81768e+06	862936	1.12968e+06	433057	0.44406	0.352559	1.34031e+06	781369	-0.778492
1036	536.203	19.9489	1190.77	160152	3533.64	1364.04	0.428826	0.367718	80672.4	2449.84	-5.04131
1037	125.035	63.3909	97191.4	62278.4	52602.1	54157.7	0.270517	0.567806	79735.9	53380.9	-0.578906
1038	773.359	28.5406	10957.7	22239.2	1915.92	7508.16	0.199635	0.699763	16599.5	4713.04	-1.81641
1039	689.525	53.7118	262401	160962	222870	253826	0.664971	0.177197	211682	238349	0.171173
1040	746.564	54.0257	782618	447910	456480	504341	0.508716	0.293525	615265	480412	-0.356937
1041	1165.63	49.004	258.333	467.029	3908.41	5162.75	0.0224361	1.64905	363.681	4536.58	3.64086
1042	702.37	36.2238	14797.2	656.035	30685.3	42452.6	0.088427	1.05341	7727.64	36570	2.24256
1043	1056.3	62.9953	68040.9	67004.1	56559.8	14783.5	0.266904	0.573645	67523.5	35672.7	-0.920571
1044	490.145	33.4182	4148.99	4767.89	8747.58	4153.2	0.480699	0.318127	4459.44	6451.39	0.532746
1045	904.483	50.0914	17768.2	22527	9008.56	10763.6	0.0559972	1.25183	20148.6	9887.08	-1.02706
1046	501.232	32.0184	9204.58	8282.99	196657	89974.6	0.127711	0.893772	8744.79	143317	4.03464
1047	95.0857	28.854	164924	90789	96591.3	30750.2	0.324747	0.488455	127858	63671.8	-1.00581
1048	614.182	56.7351	310002	185489	5443.06	33905.7	0.0702455	1.15338	247746	19675.4	-3.6544
1049	912.399	39.246	148351	120698	208735	81821.2	0.883712	0.0536894	134525	145279	0.110948
1050	950.336	36.6618	50264.4	39939.2	14967.4	5935.73	0.0370216	1.43154	45102.8	10452.6	-2.10936
1051	564.202	48.9478	58376.2	51228.1	85798.3	94130.7	0.0235143	1.62867	54803.2	89965.5	0.715112
1052	368.216	45.2502	1.60405e+06	875013	305057	104227	0.11158	0.952415	1.23953e+06	204643	-2.59862
1053	500.229	32.0183	26557.9	21660.3	641121	279579	0.137255	0.862473	24110.1	460351	4.25502
1054	915.343	33.4026	64880.1	51713.6	36110	12484.2	0.128426	0.891345	58297.8	24298.1	-1.2626
1055	898.385	36.265	0	0	137763	49640.3	0.167312	0.776474	1	93702.5	16.5158
1056	556.117	42.0019	35433.4	41540.7	75981.8	125986	0.13121	0.882034	38488	100985	1.39166
1057	1038.55	48.5487	3340.08	7411.42	14607.1	11032.9	0.110827	0.955353	5376.75	12821	1.2537
1058	1219.49	33.0424	69435.8	49312.3	25986.9	5008.87	0.0944481	1.02481	59375	15498.9	-1.93769
1059	790.59	54.0097	449338	227327	231626	252373	0.478631	0.319999	338333	242001	-0.483434
1060	314.151	35.537	2.2065e+06	1.51011e+06	1.21165e+06	906282	0.170252	0.768907	1.85831e+06	1.05897e+06	-0.811331
1061	812.291	36.4918	574.608	600.73	99522.3	26144.6	0.231866	0.634762	588.669	62834.4	6.73795
1062	1025.51	47.9789	9740.81	11551.1	7855.92	16711.3	0.751786	0.123906	10647	12284.6	0.206408
1063	1199.38	34.5025	0	0	31504.7	44193.3	0.0269655	1.56919	1	37850	15.208
1064	835.619	54.0074	132393	54917.2	52928.1	61679.3	0.449536	0.347236	93655.9	57304.7	-0.708715
1065	766.417	37.8772	41823	0	14434.9	17367	0.833351	0.0791723	20912.5	15902	-0.395161
1066	675.707	28.2822	0	0	2719.8	0	0.42265	0.374019	1	1360.9	10.4103
1067	819.338	28.5513	42262.6	49646.2	8840.71	8813.81	0.00974327	2.0113	45955.4	8828.26	-2.38003
1068	1024.58	51.1813	20706.1	2800.33	16260.1	17203	0.634512	0.19756	11754.2	16732.6	0.509483
1069	502.235	32.0063	6623.83	4171.38	44520.1	20659.9	0.151516	0.819542	5398.61	32591	2.59382
1070	869.372	34.3681	18739.6	20686.5	6734.09	1065.23	0.0340911	1.46736	19714	3900.66	-2.33743
1071	431.319	53.8934	182469	130384	161814	162185	0.850404	0.0703748	156428	162000	0.0504986
1072	659.515	54.0497	744685	425801	430111	503935	0.545121	0.263507	585244	467024	-0.325541
1073	554.177	53.837	151870	37965.1	127553	134171	0.593037	0.226918	94918.7	130863	0.463295
1074	1081.41	29.1861	118850	100278	77581.7	119474	0.677591	0.169032	109565	98528.9	-0.153171
1075	564.264	28.2988	145632	115831	96642.5	73143.8	0.137014	0.863235	130733	84894.1	-0.622883
1076	913.338	33.3992	357351	278315	327850	82918.9	0.474355	0.323897	317834	205385	-0.629939
1077	754.404	44.4606	36380	46003	14470.6	11323.8	0.0305503	1.51498	41192.5	12898.2	-1.67521
1078	617.467	51.948	448355	138400	166357	198924	0.551009	0.258842	293378	182641	-0.683749
1079	613.184	56.7341	716810	437428	38760.9	81617.8	0.0672873	1.17207	577120	60190.4	-3.26127
1080	320.171	45.7089	27159.8	24147.3	33022.5	13983.5	0.844147	0.0735819	25654.6	23504	-0.126309
1081	749.546	52.0093	270296	73615.3	105789	123040	0.618938	0.208353	171956	114416	-0.587757
1082	832.455	29.1854	411188	279727	2047.09	206455	0.185563	0.731508	345459	104252	-1.72844
1083	747.567	54.0251	356689	194718	188638	210867	0.450909	0.345911	275705	199754	-0.464904
1084	703.541	54.04	555959	311062	323513	362541	0.541441	0.266448	433512	343028	-0.337745
1085	973.298	37.2752	0	238.79	47183	30780.8	0.0417716	1.37912	120.395	38982.9	8.33892
1086	584.475	54.3875	1.14131e+06	677768	670731	733335	0.468552	0.329242	909539	702034	-0.373594
1087	90.9766	62.5099	561276	434511	402153	391148	0.252517	0.597709	497894	396652	-0.327967
1088	712.496	53.9561	83331.6	46777.5	45614.7	54086.3	0.502814	0.298593	65055.5	49851.5	-0.384036
1089	266.948	63.4645	35135.1	28197.3	27220.1	29629.8	0.470531	0.327412	31667.2	28426	-0.155781
1090	1058.52	48.5589	4309.28	10751.8	29813.5	28724.7	0.0218478	1.66059	7531.55	29270.1	1.95841
1091	615.181	56.7351	95940	58240.7	0	0	0.054909	1.26036	77091.3	1	-16.2343
1092	304.3	43.7856	7034.4	50749.2	25501	75663	0.581335	0.235573	28892.8	50583	0.807942
1093	357.11	22.9339	442644	329490	264222	117259	0.169787	0.770095	386068	190741	-1.01724
1094	1009.39	34.2935	0	0	23868.6	11435.7	0.10487	0.979347	1	17653.2	14.1076
1095	1241.43	34.1635	20668.1	0	8932.45	8131.04	0.877696	0.0566558	10335	8532.75	-0.276461
1096	832.403	35.5486	0	0	0	13975.9	0.42265	0.374019	1	6988.95	12.7709
1097	448.307	51.3029	185917	115111	148818	117327	0.696695	0.156958	150515	133074	-0.177683
1098	616.464	51.9491	1.30643e+06	392719	480710	568237	0.552151	0.257942	849576	524474	-0.695871
1099	735.215	57.3404	819998	411759	65409.7	58143.8	0.113165	0.94629	615879	61777.8	-3.31749
1100	485.142	37.2641	581.204	3264.94	48270.6	47665.8	0.000891213	3.05002	1924.07	47969.2	4.63987
1101	1048.43	37.7085	160478	85858.1	56345.9	15544	0.176713	0.752731	123169	35945.9	-1.77674
1102	540.535	53.5432	488778	293905	589097	715709	0.1537	0.813326	391342	652404	0.737333
1103	548.231	47.5996	1885.52	0	180031	406324	0.122885	0.910501	943.759	293179	8.27914
1104	179.07	19.178	40767.5	31570.1	113608	58453.2	0.216451	0.66464	36169.8	86031.6	1.25008
1105	539.35	53.5675	270623	179609	252162	288768	0.452806	0.344088	225117	270466	0.264772
1106	874.809	28.3	0	0	11389	0	0.42265	0.374019	1	5695.5	12.4756
1107	539.165	56.076	121808	141237	0	16833.8	0.0107261	1.96956	131524	8417.91	-3.96572
1108	1091.39	48.1004	27495.8	17495.1	25527.5	18044.1	0.919906	0.0362567	22496.4	21786.8	-0.0462453
1109	281.122	23.8427	90519.9	89989.9	12791.1	6029.73	0.00175478	2.75578	90255.9	9411.41	-3.26154
1110	979.478	48.9603	89061.9	62377.1	48410.9	23902.9	0.160626	0.794185	75720.5	36157.9	-1.06637
1111	511.012	48.5573	8539.88	10233.4	36530.8	24315.1	0.0762272	1.11789	9387.65	30424	1.69637
1112	1036.29	61.4532	120948	124122	100361	33880.9	0.237792	0.623803	122536	67122	-0.868345
1113	475.236	45.6377	300360	163941	140329	77233.1	0.24237	0.615521	232151	108782	-1.09362
1114	914.341	33.3992	201962	149633	160296	38885.8	0.368155	0.43397	175799	99591.7	-0.819828
1115	334.22	44.8896	192273	137791	102319	14392.1	0.175244	0.756358	165033	58356.7	-1.49979
1116	722.352	38.8699	1.3466e+06	1.04026e+06	316969	365633	0.0315667	1.50077	1.19343e+06	341302	-1.80599
1117	242.985	64.0261	81941.5	65002.8	43415.5	45958	0.0782677	1.10642	73473.1	44687.8	-0.717337
1118	721.348	38.8699	2.84694e+06	2.12099e+06	630224	767784	0.0402663	1.39506	2.48397e+06	699005	-1.82927
1119	257.165	22.7355	306367	392689	4.35742e+06	2.41057e+06	0.089485	1.04825	349529	3.384e+06	3.27524
1120	967.484	48.7117	31194.1	41728.1	25456.3	15185.3	0.159473	0.797312	36462.1	20321.8	-0.843368
1121	231.17	9.54727	22602.1	20859.9	27379.2	72239.9	0.337477	0.471756	21732	49810.5	1.19663
1122	585.478	54.3885	395587	227079	235320	252346	0.508992	0.293289	311334	243834	-0.352563
1123	423.259	53.8449	36024.4	43228.1	201460	265800	0.0267303	1.573	39627.3	233631	2.55967
1124	302.934	63.2535	50822.8	38879.3	72144.5	67532.1	0.0598085	1.22324	44852.1	69839.3	0.638864
1125	935.5	48.0815	2.96462e+06	682633	1.93285e+06	232366	0.654448	0.184125	1.82363e+06	1.08261e+06	-0.752299
1126	658.512	54.0475	1.97266e+06	1.12955e+06	1.15418e+06	1.3473e+06	0.559183	0.252446	1.55111e+06	1.25074e+06	-0.310517
1127	372.145	28.3315	208220	134903	65816.7	24426.7	0.0952721	1.02103	171563	45122.7	-1.92681
1128	925.463	50.0937	24443.2	22089.4	15040	26665.9	0.723489	0.140568	23267.3	20854	-0.157982
1129	1066.51	46.5268	50174.7	63849.1	67565	73893.3	0.210244	0.677277	57012.9	70730.2	0.311038
1130	342.171	35.6335	515751	337508	115907	11643	0.0722965	1.14088	426630	63775.9	-2.7419
1131	323.1	19.7471	123859	112055	74988.8	67712.1	0.0214206	1.66917	117958	71351.4	-0.725257
1132	518.385	53.8056	163248	139037	149310	173839	0.606495	0.217173	151144	161575	0.0962873
1133	357.109	28.2992	7.70382e+06	4.81559e+06	3.20578e+06	1.31657e+06	0.146418	0.834406	6.2597e+06	2.26117e+06	-1.46902
1134	762.558	53.2077	526943	141217	212906	233301	0.623572	0.205113	334081	223104	-0.58248
1135	926.465	50.0937	16583.3	15072.3	11042.5	17387.9	0.669963	0.173949	15828.8	14216.2	-0.155016
1136	934.496	48.0767	5.20161e+06	1.16912e+06	3.32464e+06	391799	0.647721	0.188612	3.18536e+06	1.85822e+06	-0.777536
1137	806.585	53.2077	351916	87758.9	143711	161196	0.661311	0.179594	219838	152455	-0.528063
1138	807.587	53.1876	168600	41715.9	69875	73934.9	0.652629	0.185334	105159	71905.9	-0.54839
1139	1069.44	46.304	49591.8	37232.2	32325	18625.4	0.191303	0.718278	43413	25476.2	-0.76898
1140	984.342	37.6653	65709.8	42547	63484	40641.5	0.910564	0.0406897	54129.4	52063.8	-0.0561318
1141	496.14	37.7085	56114.5	51722.4	80400.1	106759	0.0972231	1.01223	53919.4	93580.8	0.795407
1142	949.334	36.6702	89033.3	75331.6	28478.1	11404.8	0.0295623	1.52926	82183.5	19942.4	-2.04301
1143	269.194	28.8639	3.81765e+06	1.65893e+06	1.66923e+06	453111	0.308499	0.510746	2.73829e+06	1.06117e+06	-1.36762
1144	831.452	29.1873	921989	637493	1432.9	464559	0.181902	0.740162	779742	232997	-1.74269
1145	362.327	40.7433	1.0686e+06	300495	602051	687774	0.927662	0.0326102	684551	644914	-0.0860515
1146	418.175	35.5619	123687	109132	83121.7	123128	0.596266	0.22456	116411	103126	-0.174813
1147	612.184	56.7347	1.83356e+06	1.10289e+06	106618	207166	0.0707915	1.15002	1.46823e+06	156893	-3.22622
1148	731.493	58.2996	98972.5	93134.7	69953.5	64518.1	0.0186196	1.73003	96054.6	67236.8	-0.514604
1149	133.034	63.3979	13944.2	11543.4	21863.1	21603	0.0175668	1.75531	12744.8	21734.1	0.770046
1150	620.133	32.8294	2197.04	1188.36	15364.7	9902.2	0.0588162	1.2305	1693.7	12634.4	2.89911
1151	1109.46	34.1658	0	0	0	0	#DIV/0!	#DIV/0!	1	1	0
1152	1376.7	50.0902	549.112	845.388	235.388	1824.04	0.720641	0.142281	698.25	1030.72	0.56183
1153	271.21	37.7547	1.23841e+06	798653	542984	103429	0.154787	0.810266	1.01853e+06	323207	-1.65596
1154	288.218	38.6331	842543	454110	81254.1	10558.3	0.0926927	1.03295	648328	45907.2	-3.81993
1155	445.121	53.9268	200152	66118.4	147299	154400	0.816525	0.0880307	133136	150851	0.180216
1156	1054.54	48.5984	31921.9	42747.6	112002	41631.8	0.382898	0.416917	37335.8	76818.1	1.04089
1157	388.163	38.3165	451748	225397	178544	74416.5	0.230771	0.636819	338573	126481	-1.42055
1158	1024.51	47.9789	13483.9	19901.7	9421.89	25420.7	0.94034	0.0267152	16693.8	17422.3	0.0616231
1159	1377.7	50.0902	0	645.427	1395.8	1482.92	0.075535	1.12185	323.713	1440.36	2.15364
1160	328.9	63.4802	53625.4	42484	47398.8	51948.9	0.813084	0.0898648	48055.7	49674.9	0.0478083
1161	1063.44	50.0864	838.609	601.954	2203.29	1352.64	0.138841	0.857483	721.282	1778.97	1.30241
1162	303.242	54.5915	15570.3	18447.7	29064.7	66293.9	0.242145	0.615924	17010	47680.3	1.48701
1163	903.48	50.0937	11878.5	16913.3	8041.08	13374.2	0.420436	0.3763	14396.9	10708.6	-0.426984
1164	702.538	54.0406	1.34897e+06	772798	798034	896037	0.540425	0.267265	1.06089e+06	847037	-0.324773
1165	880.622	52.0765	100669	23381.9	42250.8	44808.3	0.679577	0.167761	62026.7	43530.6	-0.510859
1166	973.496	35.5284	0	0	0	0	#DIV/0!	#DIV/0!	1	1	0
1167	962.438	47.678	436073	290414	231347	341097	0.487241	0.312256	363244	286223	-0.343802
1168	622.339	53.0997	89166.5	78744.2	94357	116004	0.21928	0.659001	83956.4	105181	0.325169
1169	202.069	28.2978	276048	167993	93439.7	31595.4	0.124501	0.904827	222022	62518.6	-1.82834
1170	610.185	56.7381	4.409e+06	2.56088e+06	240727	489695	0.0788992	1.10293	3.48494e+06	365212	-3.25433
1171	286.2	37.1019	172211	12753.1	77413.4	51954.2	0.763453	0.117218	92483.1	64684.8	-0.515762
1172	615.488	54.0576	884608	488251	501725	559054	0.517396	0.286177	686430	530391	-0.372057
1173	604.316	39.4887	17939.7	16077.8	7886.09	14503.5	0.232815	0.632989	17009.8	11195.8	-0.603403
1174	497.215	49.5901	876664	955861	63369.4	50089.1	0.00217497	2.66255	916263	56730.2	-4.01357
1175	163.133	22.4751	674329	486241	531781	634714	0.980461	0.0085697	580286	583249	0.00734762
1176	759.374	28.5415	87141	85789.7	7370.85	22311.5	0.01079	1.96698	86466.3	14842.2	-2.54244
1177	527.436	54.0691	912971	497551	533710	616629	0.601643	0.220661	705262	575170	-0.29417
1178	437.231	51.6272	1.18161e+06	969127	673577	394219	0.0909408	1.04124	1.07537e+06	533899	-1.01019
1179	304.167	42.4968	166524	133231	20479.2	11027	0.0162408	1.78939	149879	15754.1	-3.25
1180	541.452	54.3875	401947	243596	240945	260601	0.462075	0.335287	322773	250774	-0.364129
1181	165.127	47.3837	29253.2	22952.2	105817	80697.3	0.0352271	1.45312	26103.7	93257.9	1.83697
1182	442.152	40.2126	22897	14576.6	105199	86660.2	0.016887	1.77245	18737.8	95930.8	2.35604
1183	873.38	40.5797	5259.85	4992.73	37106.2	2900.46	0.476102	0.3223	5127.29	20004.3	1.96404
1184	270.206	28.6897	1.19039e+06	819377	792241	271285	0.277123	0.557327	1.00488e+06	531764	-0.91817
1185	1036.54	48.5613	5138.72	11843.8	30049.3	23145.5	0.0639329	1.19428	8492.28	26598.4	1.64712
1186	329.114	28.2992	664895	401812	264070	113988	0.150859	0.82143	533355	189030	-1.49648
1187	275.259	53.8737	98332.5	74018.7	140595	167167	0.0640268	1.19364	86176.6	153882	0.836455
1188	758.372	28.5402	319801	313514	30831.6	80091	0.00891585	2.04984	316658	55462.3	-2.51335
1189	292.285	53.8761	71682	54279.9	111367	127388	0.0412737	1.38433	62982	119379	0.922533
1190	611.186	56.7381	2.503e+06	1.48053e+06	138086	274821	0.0742851	1.1291	1.99177e+06	206454	-3.27015
1191	1075.56	49.0107	2509.68	2002.76	32770.7	20335.4	0.059775	1.22348	2257.22	26554.1	3.55631
1192	563.261	28.3039	435718	346809	289708	222985	0.135947	0.86663	391264	256348	-0.610043
1193	1065.51	46.5268	77814	92933.8	103745	109423	0.11952	0.92256	85374.9	106585	0.320122
1194	217.99	22.1953	0	4284.53	15648.4	6738.79	0.208565	0.680759	2143.27	11194.6	2.38492
1195	593.309	49.0084	122041	109915	435534	590442	0.0362266	1.44097	115979	512989	2.14507
1196	260.129	35.8342	33570.6	27779.5	12528.9	12511.3	0.0245065	1.61072	30676.1	12521.1	-1.29275
1197	1062.44	50.0937	3647.51	3795.5	5686.04	5847.86	0.00286106	2.54347	3722.5	5767.95	0.631786
1198	1648.69	34.1635	0	0	0	0	#DIV/0!	#DIV/0!	1	1	0
1199	533.233	27.6755	226934	189372	62267.6	27145.1	0.0238647	1.62224	208154	44707.3	-2.21907
1200	201.066	28.2992	1.90911e+06	1.15455e+06	768789	311583	0.153572	0.813689	1.53183e+06	540187	-1.50372
1201	718.532	53.2295	757128	192670	288104	329432	0.616602	0.209995	474900	308769	-0.621097
1202	757.369	28.5303	626276	623867	58960.8	166960	0.0109419	1.96091	625073	112961	-2.4682
1203	719.33	37.9196	74140.7	52017.3	91615.3	49333.8	0.785909	0.104628	63080	70475.5	0.15994
1204	914.386	39.2436	9636.45	18980.6	24046.9	11209.2	0.716479	0.144797	14309.5	17629	0.300977
1205	916.346	33.4017	18072.6	14674.7	17441.4	5709.71	0.514354	0.288738	16374.6	11576.5	-0.500257
1206	903.26	37.4977	179474	78411.9	130634	48219.1	0.606103	0.217454	128944	89427.5	-0.527952
1207	431.205	42.6206	240627	197059	137981	51292.1	0.124651	0.904306	218844	94637.6	-1.20942
1208	438.234	51.626	334526	272947	191754	111722	0.0948959	1.02275	303738	151739	-1.00123
1209	377.17	25.3889	1.03297e+06	1.09752e+06	2.96476e+06	1.60979e+06	0.21338	0.670847	1.06525e+06	2.28727e+06	1.10244
1210	275.162	31.1845	1.52979e+06	1.27885e+06	1.73348e+06	557043	0.708649	0.149569	1.40432e+06	1.14526e+06	-0.294192
1211	358.112	28.2992	1.62491e+06	977518	655743	256087	0.156366	0.805857	1.30122e+06	455916	-1.51302
1212	675.509	53.2091	368117	105561	133793	151219	0.547803	0.261376	236840	142507	-0.732881
1213	719.535	53.2035	301815	76012.7	117992	132179	0.629432	0.201051	188915	125087	-0.594805
1214	1000.41	39.5179	0	208.115	94174.3	23158.3	0.240871	0.618216	105.057	58667.3	9.12524
1215	388.142	32.5061	44554.7	42786	8316.25	6979.5	0.000945638	3.02428	43671.4	7648.87	-2.51337
1216	474.226	50.0973	93576.7	91483.4	130621	165177	0.0854019	1.06853	92531.1	147900	0.676609
1217	1074.56	49.0002	49212.4	43072.6	116198	77150.1	0.124942	0.903293	46143.5	96675.1	1.06702
1218	270.207	37.756	7.61088e+06	4.48031e+06	3.32915e+06	547164	0.188846	0.723892	6.04559e+06	1.93816e+06	-1.6412
1219	1041.43	42.7552	53868.6	50002.7	25439.2	9193.52	0.0535413	1.27131	51936.6	17317.4	-1.58453
1220	545.327	45.1953	473558	178711	95027.7	144507	0.301469	0.520758	326136	119769	-1.44522
1221	471.844	52.1078	115903	23997	38995.6	49385.8	0.633535	0.198229	69950.9	44191.7	-0.662567
1222	490.145	35.2798	1379.92	3323.01	11044.2	3754.21	0.312704	0.504866	2352.46	7400.22	1.65339
1223	682.311	33.1007	69731.9	51473.7	55277	88847	0.609577	0.214971	60603.8	72063	0.249851
1224	362.926	62.5099	620294	464955	434948	398953	0.255661	0.592335	542626	416951	-0.380079
1225	595.172	50.8647	93236.3	62972.1	37771.7	86370	0.631776	0.199437	78105.2	62071.9	-0.331478
1226	852.475	51.6246	166900	197344	109517	28158.1	0.120913	0.917528	182123	68838.6	-1.40362
1227	482.224	48.1194	4.12522e+06	5.20571e+06	3.14351e+06	2.37903e+06	0.102543	0.989093	4.66547e+06	2.76127e+06	-0.75669
1228	598.123	37.2522	833.793	4214.63	51498.7	70788.3	0.0267867	1.57208	2525.21	61144.5	4.59775
1229	839.376	41.6458	2595.89	41529.9	170122	32107.4	0.385163	0.414356	22063.9	101116	2.19625
1230	391.141	25.2621	3086.46	3766.64	34293.8	24879.6	0.0310379	1.50811	3427.55	29587.7	3.10975
1231	594.313	49.0213	43770.1	40841.7	167819	217309	0.0261527	1.58248	42306.9	192565	2.18638
1232	987.266	37.4863	132873	120909	127413	91597	0.454351	0.342608	126892	109506	-0.212589
1233	304.212	14.1766	142517	110622	42609.2	11321.2	0.0468011	1.32974	126571	26966.2	-2.23072
1234	578.173	45.1139	34343.9	7891.22	16034.7	9654.97	0.605012	0.218236	21118.5	12845.8	-0.71721
1235	1121.42	34.1658	0	0	0	715.064	0.42265	0.374019	1	358.532	8.48596
1236	272.201	37.6675	461542	315170	226783	104820	0.144529	0.840044	388357	165802	-1.22792
1237	674.506	53.2091	949737	254985	353743	394141	0.57897	0.237344	602362	373943	-0.687811
1238	364.316	53.8802	104852	60907.1	107268	131257	0.283302	0.54775	82880.7	119264	0.525046
1239	1072.55	48.9908	180179	165111	431104	288382	0.120975	0.917303	172646	359744	1.05915
1240	632.213	22.9293	283927	169068	75304.6	52765.9	0.108967	0.962707	226498	64036.2	-1.82254
1241	573.441	51.9253	479433	160245	166400	197513	0.480469	0.318335	319840	181957	-0.81375
1242	1073.56	48.9946	124491	111780	301278	198637	0.125557	0.90116	118136	249958	1.08123
1243	963.267	60.1994	65042.4	59814.6	44475.4	2070.5	0.208278	0.681357	62429.5	23274	-1.42351
1244	924.327	19.753	90040.3	129870	61714.6	49172.5	0.120707	0.918266	109956	55444.6	-0.987808
1245	913.399	39.2427	68554.4	59869.6	74306.6	31523.9	0.656332	0.182877	64213	52916.3	-0.279154
1246	851.472	51.6311	289052	344741	187748	44550	0.120535	0.918886	316897	116150	-1.44803
1247	413.157	34.0612	274128	144002	12426.5	11283.9	0.0937909	1.02784	209066	11856.2	-4.14025
1248	626.192	34.1498	669.475	0	15870.9	21968.1	0.0261686	1.58222	335.737	18920.5	5.81647
1249	614.485	54.0571	2.53301e+06	1.37223e+06	1.40594e+06	1.61266e+06	0.530508	0.275308	1.95262e+06	1.5093e+06	-0.371529
1250	1061.44	50.0937	1781.86	1109.99	4502.17	7114.33	0.0837408	1.07706	1446.92	5809.25	2.00536
1251	428.243	44.9629	698376	480972	354975	321333	0.149516	0.825313	589675	338155	-0.802235
1252	1105.45	34.1641	0	0	252107	78752.7	0.196534	0.706562	1	165431	17.3359
1253	1106.46	34.1635	0	0	171225	53000.2	0.198332	0.702607	1	112114	16.7746
1254	219.063	18.8748	983979	724070	255167	108806	0.0458876	1.3383	854025	181987	-2.23044
1255	263.165	35.3702	137690	64205.2	146813	71423.8	0.890894	0.0501739	100949	109119	0.112289
1256	602.124	38.4258	0	0	56492.8	50812.2	0.00279082	2.55427	1	53653.5	15.7114
1257	1108.46	34.1635	0	0	17166	7106.11	0.137277	0.862402	1	12137.1	13.5671
1258	538.165	56.0837	339589	390914	23034.2	56071.6	0.00866652	2.06216	365253	39553.9	-3.207
1259	536.166	56.08	950559	1.09386e+06	74760	163719	0.00861015	2.06499	1.02221e+06	119241	-3.09974
1260	426.114	36.2078	0	0	47776.5	19317.5	0.142454	0.846324	1	33548	15.0339
1261	496.422	54.4111	1.046e+06	667398	648043	682524	0.419964	0.376788	856700	665284	-0.364819
1262	537.167	56.0806	481934	546624	38395.9	83256.4	0.0074508	2.1278	514280	60827.1	-3.07977
1263	407.781	52.0611	37136.9	8173.78	21244.3	30787	0.846023	0.0726177	22656.4	26016.6	0.199519
1264	1447.42	28.3017	115881	130122	131053	43597.7	0.505184	0.29655	123002	87326.2	-0.494199
1265	637.134	34.5103	0	3353.02	40379.6	50535.5	0.0145929	1.83586	1677.51	45458.6	4.76016
1266	486.237	48.6708	246222	204936	109182	89593.8	0.0312557	1.50507	225580	99389.1	-1.18248
1267	291.974	63.3841	33677.9	25176.6	23259.2	21359.4	0.243824	0.612924	29428.2	22310.3	-0.399492
1268	522.211	32.0207	5978.07	5333.37	62851.3	29877.8	0.13229	0.878473	5656.72	46365.6	3.03502
1269	342.205	38.0049	374613	244163	641737	1.1445e+06	0.153599	0.813611	309389	893117	1.52943
1270	258.168	22.6855	14616.3	81670.2	785252	442155	0.0837017	1.07727	48144.3	613705	3.67211
1271	630.48	53.1992	1.15383e+06	317735	409899	480470	0.560135	0.251707	735786	445185	-0.724879
1272	879.355	29.0488	59599.3	45997.6	72454	8628.63	0.743279	0.128848	52799.4	40542.3	-0.381094
1273	532.091	28.2052	766132	606252	140634	123277	0.0204067	1.69023	686193	131956	-2.37856
1274	751.357	38.8434	233516	191577	51039.5	47158.9	0.0161979	1.79054	212547	49100.2	-2.11398
1275	800.383	35.5376	74244.2	96110.3	55620.8	104903	0.872132	0.0594178	85178.3	80263	-0.0857492
1276	452.244	50.0977	646665	852312	712294	1.31934e+06	0.493354	0.306841	749490	1.01582e+06	0.438663
1277	799.38	35.5452	150176	193084	109349	194984	0.723804	0.140379	171631	152168	-0.173651
1278	594.162	50.8559	250285	163484	67596.1	219258	0.543163	0.26507	206885	143428	-0.528503
1279	878.643	53.9954	139206	62897.2	284886	58103.1	0.61564	0.210674	101053	171496	0.763064
1280	1107.46	34.1635	0	0	67990	23412.9	0.176808	0.752497	1	45702.4	15.48
1281	1059.54	48.5617	6675.22	12075.1	22974.5	23576.2	0.0361387	1.44203	9376.15	23276.3	1.3118
1282	726.383	36.263	1.80133e+06	2.3743e+06	1.44639e+06	9.457e+06	0.490349	0.309494	2.08782e+06	5.4517e+06	1.38471
1283	728.387	36.2591	94956.6	127483	78733.8	423544	0.503924	0.297635	111221	251140	1.17507
1284	866.33	27.1128	80094.1	66802.9	11689.8	2536.08	0.0144761	1.83935	73449.5	7113.92	-3.36804
1285	395.143	40.4372	5965.47	5170.63	11973.4	8961.87	0.0879091	1.05597	5569.05	10468.6	0.910567
1286	476.265	48.0688	6.42918e+06	2.90834e+06	4.00717e+06	1.47779e+06	0.467943	0.329807	4.66876e+06	2.74248e+06	-0.767559
1287	394.353	54.0574	847614	550585	760658	900550	0.507136	0.294875	699100	830605	0.248663
1288	811.344	37.2577	60937.3	37519.2	2448.59	204.87	0.0553414	1.25695	49229.3	1327.73	-5.21248
1289	741.329	41.423	1342.56	10409.3	22276.7	9084.98	0.345246	0.461871	5876.92	15681.9	1.41596
1290	345.232	49.0534	9472.33	9711.86	23658	26401.3	0.0078613	2.10451	9593.09	25030.7	1.38363
1291	242.173	15.1458	14267.9	10262.3	491938	537686	0.00208112	2.6817	12266.1	514813	5.3913
1292	815.403	35.5496	43223.5	10799.8	25222.1	28854.3	0.998848	0.000500569	27012.6	27039.2	0.00141867
1293	426.125	31.9001	900.036	228115	18169.8	35613.6	0.522315	0.282068	114508	26892.7	-2.09017
1294	1042.95	46.294	94011.5	53144.5	27776.7	6137.92	0.134029	0.8728	73579	16958.3	-2.1173
1295	560.191	48.9303	119030	57809.5	43334.5	60227.4	0.367833	0.43435	88420.5	51782	-0.771931
1296	727.385	36.2612	475756	620137	373489	2.25116e+06	0.502171	0.299148	547948	1.31232e+06	1.26001
1297	241.17	15.1089	23011.7	96664.6	2.73496e+06	2.99862e+06	0.00236931	2.62538	59839.2	2.86679e+06	5.5822
1298	1221.53	46.5888	11413	13415	49259.3	87243.4	0.0990705	1.00406	12415	68252.4	2.4588
1299	604.139	37.2812	22625.1	40847.3	222873	228844	0.00243055	2.6143	31737.2	225860	2.83118
1300	558.096	32.857	14996.9	16542.2	45517.1	31582.8	0.0830616	1.0806	15770.5	38550.9	1.28954
1301	1222.54	46.5805	8803.15	11252.4	37152.4	62927.7	0.0906689	1.04254	10028.8	50041	2.31897
1302	734.374	28.4915	14591.8	15884.4	0	3687.08	0.0206157	1.6858	15239.1	1844.54	-3.04645
1303	471.195	47.0998	195167	158957	9277.64	66115	0.053785	1.26934	177063	37697.3	-2.23173
1304	817.219	36.4816	2127.49	0	7490.14	2505.04	0.283734	0.547088	1064.75	4998.59	2.23101
1305	595.315	49.0171	5786.27	6606.67	34687	53507.8	0.0565743	1.24738	6197.47	44098.4	2.83097
1306	725.38	36.2676	3.73392e+06	4.95863e+06	3.00985e+06	1.9843e+07	0.489772	0.310006	4.34628e+06	1.14264e+07	1.39452
1307	618.199	48.1006	145226	107580	94142.9	90351.2	0.212759	0.672113	126404	92248	-0.454453
1308	572.438	51.9228	1.51366e+06	499042	507787	603118	0.46956	0.328309	1.00635e+06	555453	-0.857398
1309	504.143	41.4689	36963.4	31765.5	21198.3	21069.2	0.0365082	1.43761	34365.5	21134.8	-0.701341
1310	738.213	57.3386	205481	101437	7107.46	2261.55	0.103804	0.983785	153460	4685.5	-5.03351
1311	341.208	52.83	118313	103366	166106	173543	0.0194454	1.71118	110841	169825	0.615564
1312	461.39	49.0852	15942.6	1610.16	133223	29096.5	0.302302	0.519559	8777.37	81160.7	3.20892
1313	1294.56	48.5547	1722.66	4896.96	45106.4	19455.4	0.154232	0.811825	3310.81	32281.9	3.28547
1314	761.306	38.5664	53626.4	7357.36	17928	71298.9	0.72793	0.13791	30492.9	44614.5	0.54904
1315	230.089	38.2874	2540.53	0	27977.2	68046.6	0.145305	0.83772	1271.26	48012.9	5.23909
1316	302.101	27.3539	175259	218300	49831.5	54449	0.0216668	1.6642	196780	52141.2	-1.91609
1317	433.13	37.4908	0	5048.03	62927.9	19995.7	0.213415	0.670774	2525.02	41462.8	4.03745
1318	335.096	28.2984	870893	547202	349439	180767	0.135482	0.868118	709049	265104	-1.41933
1319	416.254	51.6152	134755	71964.3	61209.8	42112.7	0.255844	0.592026	103361	51662.3	-1.00051
1320	410.233	44.9621	273664	205326	147275	139815	0.107944	0.966803	239496	143546	-0.738487
1321	271.209	28.6847	203588	139136	133219	51571.3	0.268262	0.57144	171363	92396.2	-0.89115
1322	270.207	36.7659	1.7164e+06	1.03373e+06	686029	180029	0.156902	0.804373	1.37506e+06	433030	-1.66696
1323	410.14	36.2329	316008	169672	73504.1	116875	0.192676	0.715173	242841	95190.8	-1.35112
1324	486.188	22.9297	1.01255e+06	745294	294042	210565	0.046463	1.33289	878924	252305	-1.80057
1325	823.845	34.1635	0	0	0	0	#DIV/0!	#DIV/0!	1	1	0
1326	350.327	54.0566	300510	203554	273162	315870	0.506706	0.295244	252033	294517	0.224737
1327	1016.27	28.3022	398754	188122	142494	91057.2	0.244753	0.611271	293439	116777	-1.32931
1328	1067.44	46.3061	202410	161828	125998	81629	0.12119	0.916532	182120	103815	-0.810878
1329	501.206	29.6344	1.00041e+06	553584	118219	45767.9	0.091697	1.03765	776997	81994.2	-3.24431
1330	456.353	21.8255	183941	126186	2752.29	90171.9	0.173917	0.759658	155065	46463.1	-1.73871
1331	580.278	39.2705	188069	93701.3	72640.1	39067.8	0.231626	0.635212	140886	55855	-1.33477
1332	526.433	54.0699	3.10416e+06	1.6444e+06	1.68281e+06	1.96257e+06	0.535286	0.271414	2.37428e+06	1.82269e+06	-0.381419
1333	862.327	37.7153	126304	85659.2	79404.9	63809.7	0.255052	0.593371	105983	71608.3	-0.565629
1334	602.124	34.5128	11436.2	28576.7	192448	253385	0.0234775	1.62935	20007.5	222918	3.4779
1335	282.205	39.4535	215370	94985.7	128836	172726	0.951528	0.0215786	155179	150782	-0.0414696
1336	944.274	28.3013	887029	637484	378774	255268	0.0854289	1.0684	762257	317022	-1.2657
1337	345.197	51.503	48130.7	34651.2	21564.4	17494.9	0.089939	1.04605	41391.9	19530.7	-1.08361
1338	520.138	28.5656	33427.1	29542.1	13532.2	26105.7	0.218251	0.661045	31485.6	19819.9	-0.66774
1339	930.318	25.2127	725371	661146	401360	138655	0.0886984	1.05208	693259	270008	-1.36039
1340	801.348	41.3559	90811.3	83236	98690.1	23566.9	0.563599	0.24903	87024.7	61129.5	-0.509555
1341	170.116	14.416	81605.4	56387	58102.4	20678.7	0.319858	0.495043	68997.2	39391.5	-0.808653
1342	379.317	53.7132	42149.4	23429.1	88704.2	103967	0.0342717	1.46506	32790.3	96336.3	1.55481
1343	429.794	52.0748	51780.1	13983.7	24746.9	38418.5	0.954333	0.0203001	32882.9	31583.7	-0.0581595
1344	1647.69	34.1635	0	0	0	430.416	0.42265	0.374019	1	216.208	7.75628
1345	634.326	39.2875	14769	31291.6	20733.2	31669.3	0.779258	0.108319	23031.3	26202.2	0.186095
1346	571.462	54.064	921631	505919	516925	588568	0.524957	0.279876	713776	552748	-0.36885
1347	336.2	20.887	2.34542e+06	1.3367e+06	868001	159979	0.164112	0.78486	1.84106e+06	513991	-1.84072
1348	271.206	36.7642	310251	185447	131199	33204	0.172059	0.764324	247850	82202.6	-1.59221
1349	499.133	35.8962	48918.3	29883.2	46899.4	26137.4	0.856777	0.067132	39401.7	36519.4	-0.109595
1350	390.18	28.5364	1.35315e+06	1.11081e+06	409752	807319	0.115728	0.936562	1.23198e+06	608536	-1.01757
1351	325.228	31.804	615874	858346	4.22683e+06	3.21018e+06	0.0293767	1.532	737111	3.7185e+06	2.33477
1352	1049.31	35.3117	8526.08	16192.8	59746	6039.2	0.528093	0.27729	12360.4	32893.6	1.41208
1353	430.914	62.5099	601701	451684	482750	438375	0.486892	0.312568	526693	460564	-0.193563
1354	1646.68	34.1635	0	0	0	0	#DIV/0!	#DIV/0!	1	1	0
1355	530.135	35.2986	6765.07	8135.74	27010.8	8133.7	0.396786	0.401444	7451.41	17573.2	1.2378
1356	586.454	53.193	1.29581e+06	361547	446555	523957	0.539996	0.26761	828679	485257	-0.772065
1357	112.05	2.54695	93567	139783	108349	244876	0.493078	0.307085	116676	176614	0.59809
1358	771.525	47.8465	519412	147095	640362	39563.7	0.986577	0.0058691	333255	339964	0.0287571
1359	311.224	48.3894	350801	223168	36848.4	45901.4	0.0616438	1.21011	286985	41375.9	-2.79411
1360	631.483	53.2157	413169	117442	148438	169945	0.548428	0.260881	265306	159193	-0.736883
1361	500.203	29.6355	3.60053e+06	1.93067e+06	389309	147758	0.0976984	1.01011	2.7656e+06	268534	-3.36442
1362	767.354	36.2077	285722	290252	310657	504957	0.342831	0.46492	287988	407808	0.501883
1363	764.968	64.0835	23088.3	31178	39002.3	44661	0.0966992	1.01458	27134.1	41832.7	0.624521
1364	514.219	35.2996	780151	432258	270340	77663.5	0.161799	0.791024	606206	174003	-1.8007
1365	335.197	20.8878	1.22043e+07	6.73164e+06	4.25569e+06	749153	0.165319	0.781678	9.46796e+06	2.50242e+06	-1.91973
1366	84.081	47.0282	62810.3	38902.6	29512.4	14335.5	0.177725	0.750252	50857.5	21924.9	-1.21389
1367	909.469	50.9562	44790.8	31795.2	29281	42607	0.824305	0.083912	38294	35945	-0.0913273
1368	304.262	54.3919	94050	82418.5	43251.8	124648	0.926513	0.0331486	88235.3	83951.1	-0.0718066
1369	617.196	48.1007	448834	304302	291764	260642	0.30745	0.512225	376569	276204	-0.447181
1370	770.522	47.8465	1.03003e+06	282184	1.26944e+06	87367.5	0.977466	0.00989819	656110	678403	0.0482055
1371	347.184	41.4321	517966	431231	635319	190593	0.811068	0.0909429	474600	412957	-0.20072
1372	332.976	63.354	48806.1	43343.5	38312.6	31009.3	0.129361	0.888196	46075.8	34661.9	-0.410657
1373	553.263	42.4515	64834.4	63542.5	52333.4	28326.8	0.185591	0.731444	64189.4	40331.1	-0.670444
1374	415.249	51.6202	411242	253084	203856	132353	0.199272	0.700553	332164	168106	-0.982527
1375	811.363	35.4493	0	0	36905.4	65502	0.0698997	1.15552	1	51204.7	15.644
1376	570.459	54.065	2.86791e+06	1.53638e+06	1.56083e+06	1.82273e+06	0.530417	0.275383	2.20215e+06	1.69178e+06	-0.38037
1377	297.139	10.4165	110787	115185	166007	117156	0.363858	0.439069	112987	141582	0.325485
1378	833.456	29.188	116065	84579.2	1480.69	58323.9	0.162511	0.789116	100323	29903.3	-1.74628
1379	632.208	34.1616	0	0	26288.8	26839	0.000107237	3.96966	1	26564.9	14.6972
1380	856.339	36.2696	2455.88	28610.9	7196.05	82259.7	0.539065	0.268359	15534.4	44728.9	1.52574
1381	135.005	2.15558	40177.3	188755	28282.4	55013.8	0.436474	0.360042	114467	41649.1	-1.45858
1382	1483.7	48.9478	108298	80619.6	94695.7	36894.3	0.465432	0.332143	94459.8	65796	-0.521701
1383	549.245	28.3013	132942	107354	90484.3	74425	0.129995	0.886072	120149	82455.6	-0.543138
1384	1082.41	29.1865	75007.2	60753.9	465.013	77630.3	0.538904	0.268488	67881.5	39048.7	-0.797746
1385	862.45	50.0625	20741.7	30129.3	21579.7	19671.4	0.421035	0.375682	25436.5	20626.5	-0.302399
1386	294.939	62.515	980757	676088	527257	449260	0.162992	0.787834	828424	488260	-0.76272
1387	487.191	22.9297	289714	212584	80222.7	58377.7	0.0453055	1.34385	251150	69301.2	-1.8576
1388	297.243	49.1983	1.00844e+06	659994	31971.3	206987	0.0670153	1.17383	834219	119480	-2.80366
1389	1068.44	46.3045	135039	104881	80522.9	46017.9	0.131826	0.879999	119961	63271.4	-0.922942
1390	749.25	48.5514	15619.8	20456.1	47838	62680.8	0.0412715	1.38435	18038.9	55260.4	1.61513
1391	927.323	25.1985	160281	143860	82116.7	29558.4	0.0730014	1.13667	152072	55838.6	-1.44542
1392	364.299	54.8906	193348	198071	207955	223248	0.130827	0.883302	195710	215603	0.139654
1393	569.193	54.2734	284001	115168	138653	151485	0.585608	0.232393	199586	145070	-0.460256
1394	511.253	46.4059	1.52365e+06	540489	280610	320164	0.275329	0.560148	1.03207e+06	300388	-1.78064
1395	810.359	35.4554	0	0	81455.8	125826	0.0428945	1.3676	1	103642	16.6613
1396	603.127	34.515	2771.28	10514.3	62620.5	79101.4	0.0195139	1.70965	6643.77	70862	3.41494
1397	1086.48	34.1635	0	0	11448.7	3231.45	0.215933	0.665682	1	7341.09	12.8418
1398	409.221	45.1212	104145	73232.1	115365	62516.8	0.994163	0.00254229	88689.4	88942.1	0.00410467
1399	575.307	39.6458	21813.4	20747.1	36552.4	11284.8	0.854045	0.0685193	21281.3	23919.6	0.168609
1400	232.17	16.6103	101910	132660	81219.2	159887	0.945362	0.0244019	117286	120554	0.0396507
1401	783.347	36.5015	479393	219984	73247.8	104577	0.184044	0.735079	349690	88913.5	-1.9756
1402	412.359	54.8477	42679.4	65001.5	63115.7	49394.2	0.870775	0.0600942	53841.5	56256	0.0632884
1403	343.214	19.7627	94575.1	63440.7	31410.3	30273.8	0.0906065	1.04284	79008.9	30843.1	-1.35707
1404	422.303	53.2195	180604	87518.1	432012	133527	0.441882	0.354693	134062	282770	1.07673
1405	1242.43	34.1635	0	0	0	5030.69	0.42265	0.374019	1	2516.35	11.2971
1406	1110.78	62.519	18420.8	12437.1	22292.7	9834.6	0.935192	0.0290992	15430	16064.6	0.0581542
1407	423.156	37.4974	1.79874e+06	1.05185e+06	764535	232237	0.180643	0.743179	1.42529e+06	498387	-1.51592
1408	712.356	36.9968	24455.4	21627	16842.1	4345.94	0.191484	0.717867	23042.2	10595	-1.12089
1409	995.454	44.394	153102	185060	74139.9	22891.8	0.0573881	1.24118	169082	48516.9	-1.80117
1410	458.139	37.5207	292792	169386	82015.8	73632.8	0.131471	0.881171	231090	77825.3	-1.57014
1411	566.097	37.5418	143864	83693.7	43456.4	47360.8	0.151472	0.819669	113780	45409.6	-1.32518
1412	454.348	21.8258	8.67093e+06	6.01809e+06	111219	3.94718e+06	0.150269	0.82313	7.34451e+06	2.0292e+06	-1.85575
1413	818.353	47.7714	36588.7	84422.1	59278.6	98289.9	0.613709	0.212038	60506.4	78785.2	0.380838
1414	405.146	31.7564	1749.42	11537.4	37478.4	84805.6	0.152785	0.815921	6644.4	61143	3.20198
1415	448.21	45.1275	449048	568680	1.6818e+06	1.05263e+06	0.115548	0.937239	508865	1.36722e+06	1.42589
1416	479.394	55.8333	33342.7	57169.7	36529.2	37467.9	0.560173	0.251678	45257.2	36999.6	-0.29064
1417	878.373	30.9848	231050	186013	57640.9	7971.26	0.0345218	1.46191	208532	32807.1	-2.66819
1418	621.384	27.0453	73465.5	64282.2	0	42706.2	0.161554	0.791683	68874.8	21354.1	-1.68946
1419	453.345	21.828	3.03095e+07	2.26439e+07	412793	1.55289e+07	0.160639	0.794148	2.64767e+07	7.97083e+06	-1.73192
1420	814.232	58.1565	111395	69960.5	18155.8	0	0.0689806	1.16127	90678.9	9078.92	-3.32017
1421	542.427	53.1722	1.38477e+06	392476	456546	526697	0.508485	0.293722	888624	491623	-0.854022
1422	868.367	34.3681	44074.1	43405.6	16495.6	4559.36	0.0308983	1.51006	43740.9	10528.5	-2.05469
1423	630.195	54.0723	207990	66799.9	93644.8	98586.4	0.618104	0.208938	137396	96116.6	-0.51548
1424	433.104	24.4756	1679.21	18331	56605.7	70516.6	0.0386703	1.41262	10006.1	63562.1	2.66729
1425	1136.5	48.5777	1268.37	3694.2	3561.81	7817.64	0.32046	0.494226	2482.29	5690.73	1.19694
1426	244.261	40.6526	67787.5	47318.4	38158.5	48187.4	0.334263	0.475912	57553.9	43173.9	-0.414755
1427	596.107	34.5267	0	658.013	22129.9	42342.6	0.0874574	1.0582	330.006	32237.3	6.61009
1428	1446.42	28.2989	157170	170173	173467	64397.9	0.500864	0.30028	163673	118933	-0.46066
1429	408.218	45.1196	317039	216680	384611	201021	0.827198	0.0823904	266860	292817	0.133912
1430	449.214	45.1269	131394	168700	484257	306844	0.11357	0.944738	150048	395552	1.39844
1431	498.213	31.6622	189583	131178	145715	79662.8	0.392425	0.406243	160381	112690	-0.509151
1432	900.797	53.6335	172000	17741	40625.1	18028.3	0.488955	0.310731	94871.3	29327.7	-1.69371
1433	242.925	62.7379	11512.5	24786.9	55012.7	50176.7	0.0395775	1.40255	18150.7	52595.7	1.53492
1434	434.227	45.8398	2.02145e+06	1.23117e+06	1.44189e+06	381114	0.392802	0.405827	1.62631e+06	911505	-0.835281
1435	563.261	29.6319	285186	193420	41734.9	14405	0.0477204	1.3213	239304	28071	-3.09169
1436	455.35	21.8239	1.3294e+06	932530	20818.4	626468	0.155517	0.808222	1.13097e+06	323644	-1.80507
1437	497.425	54.414	320561	200732	191028	204070	0.404997	0.392548	260648	197550	-0.399884
1438	227.176	11.1323	2.52907e+06	2.23796e+06	25537.6	1.18821e+06	0.0974343	1.01129	2.38352e+06	606877	-1.97362
1439	177.996	63.3881	97415.1	61565.7	59131.3	59720.5	0.379419	0.420881	79491.4	59426.9	-0.419683
1440	913.338	35.3316	405002	404138	1.30102e+06	156255	0.628333	0.20181	404571	728641	0.848815
1441	985.26	37.4835	800014	686251	737905	512743	0.448908	0.347842	743134	625325	-0.249015
1442	228.179	11.1301	345472	308106	7729.57	159146	0.0891614	1.04982	326790	83438.5	-1.96958
1443	902.474	47.7349	42295	17567.4	97043.7	11667.9	0.637778	0.19533	29932.2	54356.8	0.860762
1444	385.902	63.5632	27385.7	32104.9	37205	40656.4	0.0881056	1.055	29746.3	38931.7	0.388234
1445	296.136	10.4229	669580	708380	1.06568e+06	738008	0.326015	0.486763	688981	901843	0.388412
1446	986.263	37.4835	421971	358927	390957	268624	0.471017	0.326963	390450	329791	-0.243585
1447	966.482	48.7186	77400.6	120294	64469.8	29493.2	0.201749	0.695188	98848.2	46982.5	-1.07309
1448	811.378	38.3209	56588.5	36182.6	16137.9	10442.6	0.0889845	1.05069	46386.5	13291.2	-1.80323
1449	432.144	36.2351	6880.66	16419.2	10481.9	90869	0.436688	0.359829	11650.9	50676.4	2.12087
1450	406.128	38.2873	97631.5	84702.5	175441	379446	0.209951	0.677882	91168	277445	1.6056
1451	203.051	9.73501	29915.9	19324.1	65403.7	230740	0.274622	0.561265	24621	148073	2.58835
1452	1482.7	48.9468	110825	86496.7	103701	42149.5	0.51814	0.285553	98661.9	72926.2	-0.436057
1453	1042.5	47.6976	371877	632847	248183	47405.3	0.164106	0.784875	502363	147795	-1.76513
1454	278.269	53.073	57402.8	31362.8	41330.7	54985.7	0.821336	0.0854794	44383.8	48159.2	0.117778
1455	337.133	35.0254	46402.1	43203.5	45949.7	38596.1	0.592562	0.227266	44803.8	42273.9	-0.0838521
1456	149.956	1.97549	14923.8	14583.5	20060.5	19147.4	0.00994007	2.00261	14754.7	19604.9	0.410047
1457	268.191	26.387	2.78315e+06	1.85989e+06	1.03594e+06	203856	0.111507	0.9527	2.32152e+06	619900	-1.90496
1458	808.342	35.2092	6904.14	6036.47	7335.34	8889.04	0.20629	0.685522	6471.3	8113.19	0.326213
1459	342.27	53.8947	113835	83952.3	115288	146226	0.276647	0.558073	98894.9	130758	0.402932
1460	768.356	36.2026	150642	149184	160702	254252	0.343596	0.463952	149914	207478	0.468821
1461	799.342	37.5777	38895.8	22882.3	1758.72	12098.7	0.12844	0.891301	30890	6929.73	-2.15627
1462	914.341	35.3278	207047	217865	675951	80361.2	0.633921	0.197965	212457	378157	0.831817
1463	426.228	45.1196	1.07507e+06	723545	1.2784e+06	608445	0.917816	0.0372445	899306	943422	0.0690912
1464	151.035	63.3992	1.32763e+06	1.04977e+06	1.19417e+06	1.28079e+06	0.769386	0.113856	1.1887e+06	1.23748e+06	0.0580159
1465	286.072	28.3001	343829	225296	148302	75622	0.131081	0.882461	284564	111963	-1.34573
1466	855.336	36.2639	39205.1	72564.7	36493.9	160951	0.574513	0.2407	55885.9	98723.5	0.82091
1467	1290.51	38.3013	245768	204339	101699	76405.9	0.0304005	1.51712	225055	89053.4	-1.33753
1468	1067.46	34.1645	0	0	15991.1	5558.8	0.17485	0.757335	1	10775.9	13.3955
1469	457.212	46.89	304157	220583	188426	81580.3	0.201186	0.696401	262371	135004	-0.958602
1470	832.327	37.3552	480870	317336	66333.4	34771.2	0.0526181	1.27887	399104	50553.3	-2.98089
1471	877.369	31.0009	420520	349080	106381	14627.5	0.0306734	1.51324	384801	60505.1	-2.66898
1472	777.32	36.6107	3503.47	182673	491386	303707	0.1435	0.843149	93089.1	397547	2.09444
1473	1293.56	48.556	2951.28	6309.5	55808	24447.4	0.15325	0.814598	4631.39	40128.7	3.11512
1474	879.387	30.9794	68019.8	64377.8	16371.4	3149.5	0.0144428	1.84035	66199.8	9761.44	-2.76166
1475	947.309	33.1066	53464.8	64933.4	45192.4	22078.6	0.186048	0.730374	59200.1	33636.5	-0.815572
1476	812.362	35.428	383.573	823.407	1283.59	11174.2	0.373616	0.427574	604.49	6229.92	3.36542
1477	1159.6	48.5541	42029.9	65612.2	1.76267e+06	579460	0.199618	0.699799	53822.1	1.17107e+06	4.44348
1478	752.361	38.8313	115304	96790.1	23467.1	25073.6	0.0126651	1.89739	106048	24271.4	-2.12739
1479	340.261	29.1891	3.36497e+06	1.38985e+06	11184.2	1.31797e+06	0.284963	0.545212	2.37741e+06	664576	-1.83888
1480	1043.5	47.3801	153683	267577	107716	19640	0.177992	0.7496	210631	63678.9	-1.72583
1481	306.965	63.6723	59552.4	43755.2	22448.3	22803.7	0.0667469	1.17557	51654.8	22627	-1.19086
1482	840.38	41.6156	2145.91	1143.67	95528.2	16108.4	0.305755	0.514627	1645.79	55819.3	5.08391
1483	1065.46	34.1635	0	0	71160.6	20274.3	0.214193	0.669195	1	45718.5	15.4805
1484	391.183	28.5525	346147	280210	98866.2	200176	0.113607	0.944594	313179	149522	-1.06663
1485	679.513	29.1891	2.56427e+07	1.45374e+07	6067.78	1.06983e+07	0.196019	0.707702	2.009e+07	5.35218e+06	-1.90828
1486	1066.46	34.1635	0	0	47471.4	14587.1	0.199761	0.699489	1	31030.2	14.9214
1487	156.08	36.2696	26152.1	14038.2	9301.13	25319.5	0.807564	0.0928232	20096.2	17311.3	-0.215204
1488	899.36	29.2581	391812	201935	45426.5	1167.46	0.10698	0.970695	296874	23298	-3.67158
1489	433.223	45.8391	8.1181e+06	4.75606e+06	5.7214e+06	1.42199e+06	0.403879	0.393749	6.43708e+06	3.5717e+06	-0.849797
1490	1160.6	48.5529	31732.7	50051.7	1.311e+06	431893	0.199464	0.700135	40893.2	871447	4.41348
1491	1048.45	34.1635	0	0	9566.42	3692.76	0.152566	0.816543	1	6630.59	12.6949
1492	467.203	28.6273	214242	140893	55248.7	20574.6	0.0750051	1.12491	177568	37912.6	-2.22763
1493	142.122	19.5999	453729	479906	157574	145771	0.00206912	2.68421	466818	151674	-1.62189
1494	660.416	47.3285	32942.4	36050.1	3629.19	8731.2	0.0109453	1.96077	34497.2	6181.2	-2.48052
1495	453.283	49.8432	197364	259459	327273	401178	0.106492	0.972682	228413	364227	0.673193
1496	253.179	31.4226	1.64509e+06	882554	680158	132229	0.209272	0.679289	1.26382e+06	406195	-1.63755
1497	877.33	37.9503	45124.2	0	19735.2	55580.1	0.652622	0.185338	22563.1	37658.7	0.739015
1498	561.165	48.1123	68111.1	50881.7	18656	33971.5	0.102449	0.98949	59497.4	26314.7	-1.17695
1499	1085.48	34.1635	0	0	44726	13016.7	0.210202	0.677364	1	28872.4	14.8174
1500	603.127	38.4504	0	585.212	11112.7	9258.48	0.00951937	2.02139	293.606	10186.6	5.11665
1501	855.582	53.6612	246746	177645	75660.2	29001.4	0.0617713	1.20921	212197	52331.8	-2.01964
1502	1084.47	34.1635	0	0	119614	32065.6	0.225319	0.647202	1	75840.9	16.2107
1503	482.406	54.0727	2.45541e+06	1.37892e+06	1.40658e+06	1.58635e+06	0.521364	0.282859	1.91716e+06	1.49646e+06	-0.357417
1504	785.322	38.2808	223394	195322	437961	839436	0.166476	0.778648	209359	638699	1.60916
1505	680.516	29.1889	1.04981e+07	5.69226e+06	2699.94	4.16684e+06	0.199274	0.70055	8.09516e+06	2.08477e+06	-1.95717
1506	483.409	54.0732	698890	391462	392330	463509	0.534822	0.271791	545177	427920	-0.349382
1507	1083.47	34.1635	0	0	176199	45888.3	0.230441	0.63744	1	111045	16.7608
1508	254.032	63.4256	8676.81	7708.1	15603.4	16010.8	0.00472789	2.32533	8193.45	15808.1	0.948118
1509	927.485	48.168	36946.9	14173.6	44136.8	267890	0.365791	0.436767	25561.2	156015	2.60965
1510	427.232	45.1232	320081	574062	362785	179038	0.377829	0.422705	447073	270913	-0.722681
1511	228.553	22.935	0	0	5431.33	4466.97	0.00935908	2.02877	1	4950.15	12.2733
1512	863.457	50.0655	15151.4	18780.5	12758.7	13337.9	0.166664	0.778157	16966.9	13049.3	-0.378752
1513	416.216	45.8363	170414	107306	119821	37293.8	0.365521	0.437088	138861	78558.5	-0.821803
1514	863.349	37.246	403717	324734	416722	267666	0.818368	0.0870512	364226	342195	-0.0900178
1515	698.342	32.2484	34239.6	30694.8	21765.4	6103.61	0.147314	0.831755	32468.2	13935.5	-1.22026
1516	868.332	37.71	175272	135414	138944	105117	0.330553	0.480759	155344	122031	-0.348213
1517	681.519	29.1889	2.23329e+06	1.26404e+06	738.001	934218	0.197194	0.705107	1.74867e+06	467479	-1.90328
1518	442.361	51.8135	85030.2	44035.3	55011.6	67156	0.886655	0.0522452	64533.8	61084.8	-0.079241
1519	452.396	54.4216	586327	463553	399836	420879	0.207174	0.683665	524941	410359	-0.35527
1520	519.197	49.5786	128418	447148	40216.4	31370.8	0.254757	0.593874	287784	35794.6	-3.00717
1521	864.352	37.2352	213165	172648	224281	151503	0.915164	0.038501	192908	187893	-0.0380008
1522	401.187	35.532	0	5396.22	13253	38089.3	0.212375	0.672896	2699.11	25672.1	3.24965
1523	341.151	40.8205	59362.1	220525	43806.4	69017.6	0.413464	0.383562	139945	56413	-1.31076
1524	1161.6	48.5529	14043.5	23282.7	538277	181119	0.196459	0.706728	18664.1	359699	4.26845
1525	996.457	44.3911	97297.6	121295	47825	14514.8	0.0626188	1.2033	109297	31170.9	-1.80998
1526	93.0701	29.4453	158388	98477.4	63347.8	31415.7	0.139591	0.855144	128434	47382.7	-1.43859
1527	340.192	38.8797	13273.9	11273.9	15699.8	48356.2	0.350646	0.455131	12274.9	32029	1.38366
1528	186.088	21.2304	21909.6	27748.5	17600.6	49926.8	0.640993	0.193147	24830.1	33764.7	0.443428
1529	568.193	54.2658	524053	209964	269757	289018	0.633602	0.198183	367009	279388	-0.393547
1530	226.555	37.4769	0	0	15180	17393.2	0.00458502	2.33866	1	16287.6	13.9915
1531	338.14	34.0011	84896.1	71134.5	65426.4	235322	0.485283	0.314004	78016.3	150375	0.946719
1532	1162.61	48.5507	5336.54	9229.2	171349	59168.7	0.194267	0.711601	7283.87	115260	3.98404
1533	159.116	33.3612	437782	238795	228765	68506.8	0.275942	0.559182	338289	148637	-1.18647
1534	599.402	27.0434	177206	111921	0	49246.9	0.0992216	1.00339	144564	24624.4	-2.55355
1535	1017.93	47.6883	50964.7	14377.8	11691.5	29370.4	0.610791	0.214107	32672.3	20531.9	-0.670197
1536	816.368	36.662	199092	116569	46129.6	20484.7	0.102262	0.990285	157832	33308.1	-2.24444
1537	543.243	34.1642	198716	287568	2.934e+06	1.71767e+06	0.076071	1.11878	243143	2.32584e+06	3.25787
1538	848.367	35.5131	26805	70030.1	82333.1	85736.3	0.242116	0.615976	48418.5	84035.7	0.795443
1539	815.365	36.6702	881601	510113	197160	89897.7	0.103794	0.983828	695858	143530	-2.27744
1540	310.913	62.7746	31586.9	30672.2	51005	28193.8	0.535387	0.271332	31130.5	39600.4	0.347185
1541	334.093	28.3004	5.01463e+06	3.03234e+06	1.97366e+06	988796	0.148444	0.828437	4.02349e+06	1.48123e+06	-1.44165
1542	148.039	13.4427	23322.5	13741	25276.9	25694.7	0.284073	0.546571	18532.7	25486.8	0.459673
1543	861.324	37.7153	241636	165419	154276	118491	0.251784	0.598972	203529	136384	-0.577555
1544	939.46	47.6907	4.03117e+07	3.82003e+07	3.61981e+07	2.64928e+07	0.252201	0.598253	3.9256e+07	3.13455e+07	-0.324655
1545	908.466	50.9548	107356	82526.4	71245.9	112574	0.911431	0.0402761	94942.1	91910.7	-0.0468146
1546	334.272	47.3237	14821.3	63936	8832.42	7897.1	0.333985	0.476273	39379.6	8365.76	-2.23488
1547	154.076	6.69369	32975.9	23225.2	19318.2	35920.6	0.964679	0.0156171	28101.6	27620.4	-0.0249171
1548	517.202	49.5872	265472	1.20622e+06	95507	71105.2	0.299845	0.523104	735849	83307.1	-3.1429
1549	305.269	53.1217	128106	48896.1	70857	99612.5	0.945267	0.0244454	88502	85235.8	-0.0542509
1550	881.355	28.4843	888565	552845	291133	106071	0.112487	0.948897	720706	198603	-1.85953
1551	454.304	49.2446	171988	142770	189205	168892	0.34745	0.459107	157380	179049	0.186103
1552	608.347	41.4111	3873.43	31372.5	10743.3	28802.1	0.907981	0.0419233	17624	19773.7	0.166045
1553	414.156	28.3038	1.01639e+06	646934	424624	203320	0.138069	0.859903	831665	313973	-1.40536
1554	506.286	37.7647	192217	120940	114206	31647.8	0.264792	0.577095	156580	72928.1	-1.10235
1555	401.198	45.8403	1.57431e+06	945355	1.11823e+06	310260	0.398182	0.399918	1.25983e+06	714245	-0.818741
1556	467.236	51.0178	184503	128420	120907	186079	0.95124	0.0217099	156462	153494	-0.0276303
1557	408.369	54.43	335149	296424	264468	268625	0.127233	0.895402	315787	266548	-0.24456
1558	312.218	22.2412	536554	249427	152812	59462.2	0.197791	0.703793	392992	106138	-1.88855
1559	1110.31	62.9885	90176.1	82547.1	54724.1	18767.7	0.114182	0.942404	86362.6	36746.9	-1.23278
1560	260.171	43.4975	1.55976e+06	1.368e+06	1.44235e+06	1.14008e+06	0.436474	0.360042	1.46388e+06	1.29122e+06	-0.181066
1561	831.323	37.3302	961263	609063	128334	69935.7	0.0615219	1.21097	785164	99135.7	-2.98552
1562	770.85	62.5042	159658	133272	164405	138212	0.818818	0.0868124	146466	151309	0.0469356
1563	337.252	54.1709	377453	323029	331274	363915	0.941129	0.0263507	350242	347595	-0.0109422
1564	498.901	62.5076	445041	358633	381822	324752	0.447393	0.349311	401838	353288	-0.18577
1565	91.0543	45.8517	130214	80727.4	81189.9	29687.6	0.296224	0.528379	105472	55439.8	-0.927864
1566	682.521	29.189	395150	231980	0	175570	0.200252	0.698422	313566	87785.9	-1.83671
1567	549.291	41.5064	785318	461091	376393	468588	0.355871	0.448707	623205	422491	-0.560786
1568	453.399	54.4162	168663	134005	108811	115706	0.157527	0.802646	151335	112260	-0.430902
1569	642.166	34.1626	910.496	1615.58	15118.1	23568.1	0.0508315	1.29387	1264.04	19344.1	3.93578
1570	249.185	48.4971	27498.5	24572.6	31304.1	67305.1	0.326529	0.486079	26036.5	49305.6	0.921214
1571	518.201	49.5945	79209.6	350767	27938.5	22879	0.297492	0.526525	214989	25409.8	-3.08081
1572	373.2	45.8963	54296	47109.3	129571	64105.4	0.296209	0.528401	50703.7	96839.3	0.933503
1573	874.328	35.3232	759.62	576.371	68486.4	26293.8	0.157179	0.803605	668.996	47391.1	6.14647
1574	601.357	50.0724	79757.1	52323.1	106618	34917.9	0.913235	0.0394176	66041.1	70768.9	0.0997515
1575	544.245	34.1635	48968.8	67078.5	614573	367905	0.0727121	1.13839	58024.6	491240	3.08169
1576	874.434	45.1158	4830.02	8588.1	33265.8	6105.16	0.443794	0.352819	6710.06	19686.5	1.55281
1577	288.087	28.3022	1.28498e+06	830274	552509	270094	0.137076	0.863039	1.05763e+06	411302	-1.36256
1578	875.441	45.0855	6195.19	9599.64	21468.3	6805.91	0.494263	0.306042	7898.42	14138.1	0.839955
1579	982.317	37.7085	68204.3	49332.7	68370.9	69523.5	0.394232	0.404248	58769.5	68948.2	0.230444
1580	911.395	39.2414	260540	202996	340617	141219	0.937768	0.0279047	231769	240919	0.0558622
1581	242.118	30.8895	283930	243105	55827.4	33805.7	0.0110601	1.95624	263518	44817.6	-2.55577
1582	396.193	29.2945	4.13883e+06	3.36198e+06	798065	843767	0.017188	1.76478	3.75041e+06	820917	-2.19174
1583	319.091	28.2982	793347	499524	325125	166280	0.138495	0.858565	646437	245704	-1.39559
1584	624.443	53.9811	157624	115401	130886	153140	0.839138	0.0761667	136513	142014	0.0569908
1585	1044.5	47.3833	52752.8	95967.7	39830.7	9736.16	0.200422	0.698054	74361.3	24784.4	-1.58512
1586	1055.54	48.5984	23421.4	31162	82552.7	30141.4	0.387139	0.412133	27292.7	56348	1.04585
1587	519.331	53.8982	342983	275088	57659.4	78539.3	0.0210463	1.67682	309037	68100.4	-2.18204
1588	280.119	25.8209	1.94619e+06	2.32724e+06	474770	469963	0.0128544	1.89095	2.13672e+06	472367	-2.17742
1589	391.163	36.2284	46784.5	28560.6	30096.9	79122.5	0.583626	0.233865	37673.6	54610.7	0.535631
1590	149.096	37.89	257855	165828	129733	74972.7	0.177534	0.750719	211843	102354	-1.04942
1591	542.24	34.1642	586543	849619	9.6366e+06	5.49155e+06	0.0809958	1.09154	718082	7.56407e+06	3.39694
1592	453.349	44.6863	30280	609970	294589	13397.9	0.65741	0.182164	320126	153995	-1.05576
1593	915.358	35.5131	162734	189152	277246	140340	0.683892	0.165012	175944	208794	0.246967
1594	332.149	31.9061	266497	220926	47586.6	51190.1	0.013554	1.86793	243713	49389.4	-2.30291
1595	543.431	53.1674	431454	119521	140254	174093	0.529454	0.276172	275488	157174	-0.809625
1596	499.232	43.7257	969226	699654	402330	209096	0.0858933	1.06604	834441	305714	-1.44863
1597	359.234	54.1709	165054	159502	239628	301784	0.0737624	1.13217	162279	270707	0.738256
1598	236.192	43.4804	2.09139e+06	1.45029e+06	1.05243e+06	1.11494e+06	0.166478	0.778642	1.77084e+06	1.08368e+06	-0.70849
1599	292.276	41.6362	88841.5	62148.6	12777.4	53737.5	0.226155	0.645594	75496	33258.5	-1.18268
1600	951.331	28.0643	24987.6	36821.3	4783.43	14299.2	0.10651	0.972609	30905.4	9542.33	-1.69545
1601	510.25	46.4207	125442	115206	169926	305094	0.225954	0.645981	120325	237511	0.98106
1602	404.112	37.4598	33736.2	7783.89	17470.1	16462.8	0.797705	0.0981577	20761	16967.5	-0.291106
1603	105.034	28.3022	4.51707e+06	2.84365e+06	1.82257e+06	913673	0.135856	0.866923	3.68036e+06	1.36812e+06	-1.42765
1604	299.075	28.3017	797317	500595	335287	168990	0.144825	0.839157	648957	252140	-1.3639
1605	106.037	28.2984	332395	210628	135926	74332.9	0.134943	0.869849	271513	105131	-1.36884
1606	401.143	28.2909	518497	328592	218321	101426	0.141763	0.848439	423546	159874	-1.40558
1607	245.186	11.0323	26753.4	70468.3	27381.3	53537.6	0.779291	0.1083	48611.8	40460.5	-0.264794
1608	165.573	34.1658	0	3131.92	29661.3	12374.4	0.157208	0.803526	1566.96	21018.8	3.74564
1609	426.343	50.0369	452576	122280	126055	156493	0.471137	0.326853	287429	141275	-1.0247
1610	329.198	19.7539	698850	348912	146382	139741	0.161511	0.791797	523882	143063	-1.87259
1611	529.415	51.8964	516916	173182	158686	188210	0.424659	0.37196	345050	173449	-0.992297
1612	382.13	28.3017	5.11726e+06	3.17698e+06	2.06e+06	1.02175e+06	0.141392	0.849575	4.14712e+06	1.54088e+06	-1.42836
1613	873.43	45.1148	6383.99	12622.8	55355.7	11938.1	0.385746	0.413698	9504.42	33647.9	1.82385
1614	645.427	52.7646	9160.57	50012.6	17328.7	8022.93	0.504276	0.297332	29587.6	12676.8	-1.2228
1615	397.196	29.2969	1.03852e+06	854151	229403	221502	0.0159907	1.79613	946337	225453	-2.06952
1616	659.168	19.7475	7367.27	43472.7	64144.1	46433.1	0.275745	0.559492	25421	55289.6	1.12099
1617	464.374	55.1466	22885.1	28894.9	107307	117731	0.00478806	2.31984	25891	112520	2.11966
1618	928.489	48.1893	8834.18	6827.06	20602.3	148459	0.353119	0.452079	7831.62	84531.6	3.43211
1619	200.152	37.8104	114510	73527	39794.4	1681.13	0.120107	0.92043	94019.5	20738.8	-2.18063
1620	831.401	35.5515	0	19978	48445.8	46131.7	0.0656093	1.18303	9990.02	47289.7	2.24297
1621	402.201	45.84	406936	254783	292771	79905.6	0.384417	0.415198	330861	186339	-0.828291
1622	739.212	57.3386	90651.3	43829	0	0	0.102858	0.98776	67241.2	1	-16.0371
1623	808.436	49.0472	2890.85	3399.55	4425.26	13077.1	0.325039	0.488065	3146.2	8752.18	1.47603
1624	318.088	28.3071	6.87927e+06	4.21312e+06	2.7262e+06	1.30208e+06	0.144448	0.840289	5.5462e+06	2.01414e+06	-1.46134
1625	576.318	47.6869	104263	69360.5	64307	60858.7	0.301177	0.521178	86812.7	62583.8	-0.472116
1626	548.288	41.5052	2.19937e+06	1.24828e+06	1.06334e+06	1.277e+06	0.37377	0.427396	1.72383e+06	1.17017e+06	-0.558899
1627	206.162	29.1847	295903	202359	99959.3	31256.6	0.0871192	1.05989	249132	65609	-1.92494
1628	717.231	54.9474	193602	85302	73637.6	72559.8	0.345176	0.461959	139453	73099.7	-0.931841
1629	867.323	37.7077	329342	257121	257904	206401	0.302346	0.519496	293233	232154	-0.336966
1630	383.133	28.2994	1.16355e+06	734244	489551	244132	0.14279	0.845301	948900	366843	-1.3711
1631	370.127	32.84	519124	278652	113851	114454	0.141443	0.84942	398889	114154	-1.80501
1632	659.413	47.3244	88080.5	81114.9	6156.98	18912.1	0.0100155	1.99933	84598.7	12535.6	-2.75461
1633	483.287	51.6272	3.53369e+06	1.19386e+06	689198	414792	0.263869	0.578612	2.36377e+06	551996	-2.09836
1634	640.336	36.2978	26452	3566.18	24741.6	118444	0.361508	0.441882	15010.1	71593.8	2.2539
1635	399.215	49.0294	15534.8	14777.7	104344	180598	0.0791834	1.10137	15157.2	142472	3.2326
1636	361.203	47.3036	148611	111649	60080.8	40132.6	0.0624857	1.20422	130131	50107.7	-1.37686
1637	349.112	29.6222	1.58953e+06	1.11242e+06	280889	99619	0.045093	1.34589	1.35098e+06	190255	-2.828
1638	348.109	29.623	8.99352e+06	6.06271e+06	1.46391e+06	513341	0.0512664	1.29017	7.52812e+06	988629	-2.92879
1639	350.114	29.6222	270432	194150	47093	16187.4	0.0395828	1.40249	232292	31641.2	-2.87606
1640	292.191	21.4469	628533	370210	221642	37927.8	0.144959	0.838755	499373	129786	-1.94398
1641	495.216	49.5985	345224	2.57383e+06	161833	123037	0.35876	0.445196	1.45953e+06	142436	-3.35712
1642	221.187	43.6201	224759	153881	110550	117971	0.169752	0.770185	189321	114261	-0.728498
1643	580.417	53.9944	184550	141763	155591	179722	0.871522	0.0597218	163158	167658	0.0392511
1644	432.216	48.5938	88628.5	196494	320455	698493	0.202926	0.692662	142562	509475	1.83742
1645	521.289	51.5191	298329	330655	339743	300219	0.849691	0.0707389	314493	319982	0.024964
1646	449.192	29.6237	1.14022e+06	719294	159147	53135.5	0.062954	1.20098	929758	106142	-3.13086
1647	189.164	50.9502	29063.6	30771	28189	41933.6	0.534994	0.271651	29918.3	35062.3	0.228894
1648	817.378	35.5467	89473.1	103198	92266.9	100747	0.984963	0.00658027	96336.5	96508.1	0.00256703
1649	496.219	49.5945	109282	731168	48425.5	37509.5	0.348931	0.457261	420226	42968.5	-3.28981
1650	818.38	35.548	29280.1	42147.7	54610.2	50425.2	0.130993	0.88275	35714.9	52518.7	0.556305
1651	779.356	38.3046	214210	150525	81248.7	52732.2	0.0805467	1.09395	182369	66991.5	-1.44481
1652	202.048	9.73291	15899.2	14497.3	572195	2.21802e+06	0.235566	0.627888	15199.3	1.39511e+06	6.52023
1653	498.389	53.1571	1.389e+06	403511	406072	518566	0.47386	0.32435	896258	462320	-0.955023
1654	194.045	28.3063	5.06524e+06	3.21875e+06	2.07982e+06	1.04354e+06	0.135063	0.869462	4.142e+06	1.56168e+06	-1.40723
1655	298.072	28.3046	4.51934e+06	2.85308e+06	1.86065e+06	918069	0.138491	0.858579	3.68621e+06	1.38936e+06	-1.40772
1656	139.075	51.3009	53456.5	39331	116604	77660.7	0.133964	0.873011	46394.8	97133.2	1.066
1657	824.384	44.5646	4593	6906.57	49249	35040.8	0.0369561	1.43231	5750.78	42145.9	2.87356
1658	301.286	41.994	141353	72669.5	47425.3	71448.7	0.3211	0.493359	107012	59438	-0.848321
1659	156.037	28.3017	335638	209741	138182	71228.8	0.142593	0.845902	272690	104706	-1.38091
1660	865.328	27.1015	149143	129405	20846.9	6449.66	0.0093231	2.03044	139275	13649.3	-3.35104
1661	948.279	28.2971	9956.63	2444.75	41159.8	22534.4	0.125162	0.902527	6201.69	31848.1	2.36047
1662	438.38	54.0732	1.35791e+06	851842	847346	977697	0.538267	0.269002	1.10488e+06	912523	-0.275951
1663	259.168	43.4975	9.99156e+06	8.77362e+06	9.24808e+06	7.11242e+06	0.431176	0.365346	9.38259e+06	8.18025e+06	-0.197841
1664	538.323	50.6937	129372	110891	129290	121830	0.640517	0.193469	120132	125561	0.0637649
1665	729.387	36.2639	33142.9	5118.28	7166.31	84828.4	0.581949	0.235115	19131.6	45998.3	1.26562
1666	174.945	2.1597	34600.8	52747	19134.1	36248.2	0.328513	0.483447	43674.9	27692.1	-0.657328
1667	531.259	42.3861	892717	644561	830238	1.4177e+06	0.38108	0.418984	768640	1.12397e+06	0.548224
1668	674.705	28.2978	0	0	28352.7	0	0.42265	0.374019	1	14177.4	13.7913
1669	174.035	2.75141	12723.5	10942.7	27656.4	26611.9	0.00452026	2.34484	11834.1	27135.2	1.19722
1670	103.006	63.4017	5341.86	4108.53	7612.38	10121.5	0.0975366	1.01083	4726.19	8867.92	0.907916
1671	333.205	44.8942	841626	597527	441061	70598.1	0.171715	0.765191	719577	255831	-1.49196
1672	921.27	28.2978	253215	125600	97453.4	28655.5	0.223444	0.650831	189409	63055.5	-1.58681
1673	276.166	31.1855	264228	219190	288251	98755	0.669638	0.17416	241710	193504	-0.320914
1674	419.18	35.5619	61655.8	45489.1	2435.97	9077.27	0.0318157	1.49736	53573.5	5757.62	-3.21797
1675	499.232	42.4271	252939	211791	250617	45261	0.504746	0.296927	232366	147940	-0.651385
1676	814.363	36.6712	3.26436e+06	1.77952e+06	687460	291543	0.118125	0.927657	2.52194e+06	489503	-2.36515
1677	195.048	28.3022	505363	320274	210284	106040	0.138673	0.858009	412819	158163	-1.3841
1678	761.322	36.2258	222064	199713	312716	109193	0.999542	0.000199149	210889	210956	0.000453991
1679	777.234	54.5366	182658	67943.3	55947.3	58752.8	0.357954	0.446173	125301	57351	-1.12751
1680	234.067	63.4543	112479	110385	156474	196783	0.0839319	1.07607	111433	176630	0.66455
1681	778.232	54.5266	152663	56166.6	44863.2	40435.2	0.329291	0.482421	104416	42650.2	-1.29171
1682	433.219	48.5942	26551.5	64542.4	93330.4	204356	0.220381	0.656827	45548	148844	1.70835
1683	438.286	47.7134	98506.9	67537.1	234978	56082.9	0.562231	0.250085	83023	145531	0.809747
1684	240.082	62.5075	40081.4	28160.9	35244.9	27148.8	0.724137	0.140179	34122.2	31197.8	-0.129263
1685	868.46	47.6581	16950.8	12727.6	13765.2	28415.9	0.498396	0.302426	14840.2	21091.6	0.507154
1686	1095.57	41.5114	156730	114604	106506	117465	0.390194	0.408719	135668	111986	-0.276762
1687	802.352	41.3613	47716.6	47072.1	50326.9	13171	0.488414	0.311212	47395.4	31750	-0.577991
1688	349.112	28.3004	3.68406e+06	2.22138e+06	1.4486e+06	663068	0.149679	0.824838	2.95272e+06	1.05583e+06	-1.48366
1689	374.185	36.2612	7.1474e+06	7.4373e+06	4.51147e+06	1.26379e+07	0.782329	0.10661	7.29235e+06	8.57468e+06	0.2337
1690	358.202	40.6749	874614	464870	248937	104252	0.151266	0.820259	669743	176595	-1.92316
1691	419.092	20.9528	14766.1	32677	59462.4	40144.1	0.18624	0.729928	23722.5	49804.2	1.07001
1692	619.419	57.0446	120089	116830	143165	168633	0.100214	0.999073	118461	155900	0.396214
1693	841.441	49.0649	1896.04	2513.71	4451.73	9873.34	0.21084	0.676046	2205.88	7163.53	1.69932
1694	946.49	50.0979	23729.6	39633.5	16651.4	14994.5	0.185759	0.73105	31682.5	15824	-1.00158
1695	833.333	37.4514	194347	141578	43675.1	37531.5	0.0408531	1.38877	167963	40604.3	-2.04844
1696	786.327	38.2799	157988	138727	226629	424545	0.216604	0.664333	148358	325588	1.13396
1697	860.332	37.4264	0	0	117365	28638.8	0.241594	0.616913	1	73002.7	16.1557
1698	348.109	28.303	2.06597e+07	1.23561e+07	7.96131e+06	3.56816e+06	0.149457	0.825483	1.65079e+07	5.76474e+06	-1.51783
1699	514.106	37.4517	604884	391820	137081	98184.5	0.0722487	1.14117	498353	117634	-2.08287
1700	244.097	28.3017	712038	453847	304132	156950	0.141121	0.85041	582944	230542	-1.33833
1701	311.254	53.8782	242218	98277.5	176700	197792	0.836967	0.0772918	170249	187247	0.137299
1702	348.109	22.9243	2.65528e+06	2.00914e+06	601750	297440	0.0341482	1.46663	2.33221e+06	449596	-2.375
1703	656.367	36.2076	294143	400457	156092	121553	0.064951	1.18741	347301	138824	-1.32293
1704	452.256	35.5313	591533	273899	97300.9	147634	0.193456	0.713417	432717	122468	-1.82102
1705	499.403	53.1494	417803	119573	118023	149452	0.463094	0.334331	268689	133739	-1.00652
1706	191.179	49.0792	3987.79	2533.77	2412.84	6928.96	0.61251	0.212886	3261.78	4671.9	0.51835
1707	308.186	36.8139	648520	279147	9181.88	9618.66	0.133001	0.876145	463835	9401.27	-5.62461
1708	343.146	40.8283	6663.75	76661.7	12775.3	20917.5	0.554203	0.256331	41663.7	16847.4	-1.30627
1709	865.392	43.2071	44000.1	106381	99568	72708.4	0.777742	0.109165	75191.5	86139.2	0.196101
1710	331.268	48.3322	426268	292786	123047	117076	0.0697837	1.15625	359528	120062	-1.58232
1711	365.273	53.6824	113031	43606.5	82533.3	98466.2	0.764925	0.116381	78319.5	90500.7	0.208558
1712	496.16	31.633	1.84262e+06	1.07035e+06	177573	61825.2	0.0757456	1.12064	1.45649e+06	119700	-3.605
1713	508.338	54.1784	3.18238e+06	2.71553e+06	294733	371276	0.00807745	2.09273	2.94896e+06	333006	-3.14659
1714	215.935	63.5334	24110.8	19505.3	30831.6	34456.2	0.065978	1.1806	21809	32644.9	0.581931
1715	307.189	36.8128	37764.3	22959.2	26752.9	30654.5	0.848614	0.0712897	30362.8	28704.7	-0.0810148
1716	397.148	36.2193	1.43086e+06	887162	362669	65301.4	0.0927841	1.03253	1.15901e+06	213986	-2.43731
1717	440.359	51.8115	1.62962e+06	756970	370501	453597	0.216618	0.664305	1.19329e+06	412050	-1.53406
1718	415.213	45.8385	611147	391938	447487	127653	0.384764	0.414806	501544	287571	-0.802457
1719	400.14	28.2988	2.16939e+06	1.35464e+06	871811	419856	0.138822	0.857542	1.76202e+06	645835	-1.44799
1720	1218.59	48.938	204994	97271.6	65168.4	24959.7	0.20634	0.685416	151134	45065	-1.74575
1721	945.303	33.1074	339527	352880	255189	117483	0.147033	0.832586	346205	186337	-0.89371
1722	373.23	51.2961	41834.9	33422.6	70811.8	52984.9	0.132838	0.876677	37629.8	61899.4	0.718051
1723	528.412	51.8932	1.67499e+06	576624	503417	610326	0.410867	0.386299	1.12581e+06	556873	-1.01554
1724	200.032	17.9415	55949	32292.4	35657.9	15855.8	0.355995	0.448556	44121.7	25757.9	-0.776477
1725	358.203	46.5397	227162	118427	91915.8	35756.3	0.216928	0.663684	172795	63837.1	-1.4366
1726	258.076	28.2992	296644	197245	132541	68705.9	0.131552	0.880904	246946	100625	-1.29521
1727	452.125	36.2512	63374.3	74548.3	99557	177648	0.219503	0.658559	68962.3	138603	1.00708
1728	364.022	63.4654	15479.2	7917.21	17788.3	21831	0.199042	0.701056	11699.2	19810.6	0.759862
1729	277.178	39.5697	3.73285e+06	2.88615e+06	2.47191e+06	1.17804e+06	0.194822	0.710362	3.3095e+06	1.82498e+06	-0.858735
1730	733.371	28.4977	57407.9	52968.8	2249.26	8721.06	0.0061751	2.20936	55189.3	5486.16	-3.33052
1731	545.248	34.1635	4192.04	8610.04	118692	69943.9	0.06951	1.15795	6402.04	94318.9	3.88094
1732	537.285	48.5454	119407	145914	102052	79175.4	0.138292	0.859202	132661	90614.8	-0.549927
1733	954.275	42.001	3385.98	5644.27	66162.7	54855.2	0.0104361	1.98146	4516.12	60509.9	3.74402
1734	257.07	28.3021	297564	195782	131351	70011	0.133312	0.875132	246674	100682	-1.2928
1735	695.281	50.6914	181745	126666	35618.9	17942.8	0.0478528	1.32009	154207	26781.8	-2.52554
1736	483.25	45.0334	1.37644e+06	948781	283484	431029	0.0706308	1.15101	1.16261e+06	357257	-1.70233
1737	736.187	19.7475	0	30541.8	61655.5	46519.1	0.150459	0.822581	15271.9	54088.3	1.82443
1738	152.036	63.4035	239605	190551	223307	233814	0.644725	0.190626	215079	228561	0.0877146
1739	745.388	45.4663	72152.1	97398.2	44638.9	11182.3	0.113215	0.946097	84776.1	27911.6	-1.60279
1740	877.461	44.9856	5018.65	6776.83	5800.96	2320.9	0.445548	0.351105	5898.74	4061.93	-0.538241
1741	690.318	37.5002	84932.9	54241.9	30241	33463.4	0.134319	0.871861	69588.4	31853.2	-1.12741
1742	218.042	7.40597	40577	39740.6	94222.6	146762	0.0923788	1.03443	40159.8	120493	1.58513
1743	480.122	38.2833	2450.97	0	111927	122482	0.00217514	2.66251	1226.48	117205	6.57837
1744	434.222	48.5893	3768.33	14152.7	19457.6	37834.1	0.203146	0.692193	8961.53	28646.9	1.67656
1745	315.125	44.2698	7092.49	36392.7	43761.1	15346.8	0.738744	0.131506	21743.6	29554.9	0.442808
1746	381.106	9.73867	13659.7	17695.7	51984.6	299868	0.325296	0.487721	15678.7	175927	3.4881
1747	519.23	42.7694	117522	88827.1	79438	33217	0.227175	0.643639	103175	56328.5	-0.873163
1748	614.312	45.6548	8282.41	7268.26	19603.1	29737.8	0.0800942	1.0964	7776.34	24671.4	1.66568
1749	488.872	62.4999	156969	90564	83898.1	48144.1	0.26536	0.576165	123768	66022.1	-0.906612
1750	658.171	19.7467	5188.23	29491	48164.3	33807.5	0.235831	0.627398	17340.6	40986.9	1.24101
1751	408.143	33.6957	108563	92961.9	114740	140336	0.215938	0.665672	100763	127539	0.339962
1752	107.049	6.69956	14899.7	8823.95	23830.1	82824.8	0.296894	0.527399	11862.8	53328.5	2.16846
1753	255.066	28.3021	215478	135604	88674	41960.4	0.140092	0.853587	175542	65318.2	-1.42626
1754	826.34	33.0512	71751	62024.3	26507.3	8553.25	0.0402243	1.39551	66888.7	17531.3	-1.93183
1755	813.36	36.672	6.68822e+06	3.54536e+06	1.35372e+06	559783	0.124151	0.90605	5.11679e+06	956751	-2.41902
1756	325.228	27.5775	22851.1	118279	717469	546419	0.0291117	1.53593	70566.2	631945	3.16275
1757	900.331	19.6493	0	56446.3	29510	0	0.713502	0.146605	28224.1	14756	-0.93563
1758	309.234	24.732	96134.3	35361.9	622247	568123	0.00585489	2.23248	65749.1	595186	3.1783
1759	1177.51	41.5186	3065.98	10505.8	16869.3	23509.1	0.114996	0.939319	6786.9	20190.2	1.57283
1760	548.228	39.1104	0	1568.11	26530.7	25493.5	0.00138554	2.85838	785.054	26013.1	5.0503
1761	375.188	36.2612	1.82113e+06	1.81127e+06	1.06093e+06	2.83999e+06	0.89388	0.0487209	1.8162e+06	1.95046e+06	0.10289
1762	887.312	28.3039	1.96255e+07	1.40837e+07	1.20583e+07	6.81941e+06	0.191221	0.718466	1.68546e+07	9.43884e+06	-0.83646
1763	886.313	28.3039	5.0737e+07	4.27388e+07	3.85433e+07	2.37343e+07	0.204967	0.688315	4.67379e+07	3.11388e+07	-0.585877
1764	378.9	62.7223	0	5789.39	26911.9	14548.5	0.12055	0.918834	2895.7	20731.2	2.83982
1765	329.257	46.7426	109197	166356	40330.3	60370.4	0.101971	0.991523	137778	50351.3	-1.45224
1766	660.5	54.0996	258829	180193	108529	117105	0.114328	0.941848	219512	112818	-0.960304
1767	1042.8	62.5122	43947.6	29920.9	41610.5	35017	0.875112	0.0579362	36935.2	38314.8	0.0529018
1768	415.262	47.2116	58035.8	57561.5	45501.7	95028.6	0.664653	0.177405	57799.6	70266.2	0.28177
1769	273.077	28.2886	7.07375e+06	4.49507e+06	3.00363e+06	1.43176e+06	0.142023	0.847643	5.78441e+06	2.2177e+06	-1.38311
1770	349.295	53.106	217371	77498	72945.2	86423.5	0.436649	0.359867	147435	79685.3	-0.887697
1771	440.266	35.532	567355	243121	106696	150662	0.233008	0.632628	405239	128680	-1.65498
1772	754.226	54.3099	66782.1	26160.1	19297.4	18892.7	0.310102	0.508496	46472.1	19096	-1.28309
1773	634.308	36.5317	0	418.058	60295.3	17954.4	0.207432	0.683123	210.029	39125.8	7.54139
1774	923.528	51.4071	71273.2	81607	128720	104505	0.0926882	1.03298	76441.1	116614	0.609317
1775	424.213	43.1165	177597	94295.3	110000	80203.6	0.453304	0.34361	135947	95102.9	-0.515484
1776	372.144	29.6397	197655	117786	28664.1	14720	0.0784976	1.10514	157722	21693	-2.86208
1777	605.142	37.2843	2293.29	8921.48	69621.4	74477.6	0.00380169	2.42002	5608.39	72050.5	3.68335
1778	448.184	40.5954	103647	60475.3	112470	65987.4	0.842214	0.0745774	82062.1	89229.8	0.12081
1779	668.469	53.9679	115841	81944.2	86277	96324.3	0.709422	0.149095	98893.5	91301.7	-0.115234
1780	1273.5	37.7153	213517	144678	158807	111803	0.403614	0.394033	179098	135306	-0.404525
1781	906.824	62.4955	99871.4	75741.8	100723	113737	0.292199	0.534321	87807.6	107231	0.288307
1782	366.322	53.109	633301	215123	196694	242544	0.433314	0.363198	424213	219620	-0.949781
1783	242.082	28.2966	160567	106362	56497.3	17111.2	0.102065	0.991122	133465	36805.2	-1.85848
1784	398.254	22.2451	343007	269447	165171	59057.7	0.0950954	1.02184	306228	112115	-1.44962
1785	475.245	53.041	67610.8	57734.4	47936	62984.9	0.507016	0.294978	62673.6	55461.5	-0.176371
1786	753.226	54.3088	87835.1	45709.8	36736.6	28706.5	0.253201	0.596535	66773.4	32722.5	-1.02899
1787	566.888	62.5074	358288	284192	307067	274151	0.528766	0.276737	321241	290610	-0.14457
1788	964.459	46.4586	22927.9	26147.7	23550.9	11969.9	0.376557	0.424169	24538.8	17761.4	-0.466319
1789	274.081	28.2909	1.1372e+06	728521	485096	245910	0.138793	0.857632	932862	365504	-1.35178
1790	569.571	53.599	207562	51204.1	64775.3	70915.4	0.513952	0.289078	129384	67846.3	-0.931317
1791	537.32	50.6937	359027	295573	370223	339390	0.51715	0.286384	327301	354807	0.116417
1792	1042.48	44.3947	298.915	1841.34	27425.5	13879.7	0.102823	0.987909	1071.13	20653.6	4.26919
1793	505.353	37.7435	553987	351251	328051	32559.2	0.267919	0.571997	452620	180306	-1.32785
1794	392.223	49.0809	28825.7	26071.1	35101.1	68545.7	0.283462	0.547505	27449.4	51824.4	0.916857
1795	149.023	49.874	1.3771e+06	492720	374945	472909	0.369573	0.4323	934911	423928	-1.14101
1796	328.256	53.1054	119816	64797.8	60788.1	66167.4	0.406446	0.390997	92308	63478.7	-0.540182
1797	431.22	50.4566	6990.73	10197.4	42530.8	35648.1	0.0151474	1.81966	8595.07	39090.5	2.18523
1798	337.213	23.176	1.02938e+06	562303	171620	36353.4	0.104496	0.980901	795840	103988	-2.93607
1799	417.228	49.8199	126626	90925.6	203009	124023	0.333877	0.476413	108777	163517	0.588071
1800	522.292	51.5193	105101	120383	111899	105852	0.684312	0.164746	112743	108877	-0.0503435
1801	751.354	36.1474	24967.9	13729.3	33240.4	5315.56	0.99668	0.00144418	19349.6	19279	-0.00527821
1802	967.28	37.3792	71244.5	51888.6	14123.3	2715.04	0.0418907	1.37788	61567.5	8420.17	-2.87025
1803	167.106	30.6173	256247	190954	111974	60752	0.0805276	1.09406	223601	86364.1	-1.37242
1804	842.444	49.0691	4477.87	3698.24	3666.48	8018.53	0.510613	0.291908	4089.05	5843.51	0.515067
1805	776.233	54.5439	241501	98057.3	81296.1	85477.7	0.351742	0.453776	169780	83387.9	-1.02576
1806	820.307	35.2423	41906.4	73121	18504.7	1326.33	0.116171	0.934901	57514.7	9916.5	-2.53603
1807	325.119	36.8875	300944	125598	43810.1	122982	0.309474	0.509376	213272	83397	-1.35463
1808	1272.49	37.71	268949	180376	201288	142445	0.425355	0.371248	224663	171867	-0.38647
1809	245.082	28.3022	618143	416334	291421	138686	0.139571	0.855206	517240	215055	-1.26613
1810	105.07	43.5005	168798	125627	88524.1	62084.5	0.104789	0.979682	147214	75305.3	-0.967088
1811	907.463	50.9539	172194	133567	108722	189438	0.940043	0.0268523	152881	149081	-0.036318
1812	191.179	39.5588	149236	90084.1	63342.1	24561.9	0.165628	0.780866	119661	43953	-1.44492
1813	838.837	62.4986	126548	103903	128742	110213	0.798717	0.0976069	115227	119478	0.0522717
1814	279.16	49.874	4.12157e+06	1.38029e+06	1.06009e+06	1.3449e+06	0.377908	0.422614	2.75093e+06	1.20249e+06	-1.19389
1815	275.082	28.3001	160973	95741.6	55420.6	17097.1	0.135294	0.868723	128358	36259.8	-1.82373
1816	814.378	34.1635	17067.3	38159.8	230639	91754.9	0.19754	0.704345	27614.6	161198	2.54533
1817	390.16	36.2418	186158	151615	111362	318400	0.703997	0.152429	168888	214882	0.34748
1818	405.288	54.1709	537016	495065	336662	337544	0.0134699	1.87064	516042	337104	-0.614294
1819	716.23	54.9428	278870	122563	107726	115630	0.373137	0.428131	200718	111679	-0.845812
1820	1098.39	29.1877	233273	210186	279.039	382399	0.888431	0.0513762	221731	191340	-0.212669
1821	793.318	36.2696	0	2429.5	37398.3	62773.2	0.06178	1.20915	1215.75	50086.8	5.36451
1822	803.321	36.2077	0	0	27381.5	22036	0.0114991	1.93934	1	24709.7	14.5928
1823	791.249	55.3709	119668	40425.2	32511.4	34722.2	0.36211	0.44116	80047.8	33617.8	-1.25164
1824	222.112	39.9906	196873	94849.6	42803	39714.7	0.176916	0.752234	145862	41259.9	-1.8218
1825	754.34	36.8652	53323.1	57586.7	10682.2	5335.06	0.00515389	2.28786	55455.9	8009.61	-2.79154
1826	888.314	28.3039	4.27004e+06	3.16061e+06	2.72809e+06	1.58651e+06	0.189413	0.72259	3.71533e+06	2.1573e+06	-0.784262
1827	879.808	63.4225	28067.9	20064.8	21186.5	203575	0.435368	0.361144	24067.3	112382	2.22326
1828	323.13	42.0025	168307	21479.5	26228.3	38024.4	0.483857	0.315283	94894.3	32127.3	-1.56252
1829	328.176	22.848	252819	152668	50133.4	14477.4	0.0850396	1.07038	202745	32306.4	-2.64977
1830	83.0496	39.3704	221159	132837	97180.8	32436.4	0.177006	0.752012	176999	64809.6	-1.44946
1831	280.163	49.874	690113	247028	192025	241052	0.375522	0.425364	468572	216539	-1.11364
1832	312.218	20.9122	624209	294549	184667	43860.9	0.194034	0.712121	459380	114265	-2.0073
1833	753.319	39.5381	42590.6	41767.5	81328.3	37794.3	0.508372	0.293818	42180.1	59562.3	0.497839
1834	718.229	54.94	151022	62744.7	51046.7	57047.4	0.354796	0.450021	106884	54048	-0.983735
1835	401.329	54.0524	83929.9	92396.5	88800.8	91331.6	0.708649	0.149569	88164.2	90067.2	0.0308101
1836	407.195	39.1446	293607	189720	93672.2	97727.9	0.106883	0.971091	241664	95701	-1.3364
1837	191.179	43.502	188985	135366	99562.2	59821.1	0.132025	0.879344	162177	79692.6	-1.02505
1838	581.346	41.3862	5296.69	16555.6	49369.4	69058	0.0509731	1.29266	10927.1	59214.7	2.43804
1839	196.061	7.40079	182829	171929	64719.8	80228	0.00806375	2.09346	177380	72474.9	-1.29129
1840	483.141	35.527	809043	350751	24465	51457.3	0.142131	0.847311	579898	37962.2	-3.93317
1841	497.216	40.923	910198	556843	379846	176883	0.155079	0.809447	733521	278365	-1.39786
1842	961.434	47.6788	660283	423565	317179	519137	0.509733	0.292657	541925	418159	-0.374042
1843	518.227	42.7795	354562	250311	237685	98900.6	0.262226	0.581324	302437	168294	-0.845654
1844	159.116	37.8612	462705	291944	212643	107214	0.162611	0.78885	377326	159929	-1.23838
1845	969.269	34.5026	2577.85	7217.78	82808.9	63181.1	0.0212341	1.67297	4898.82	72996	3.89731
1846	210.022	63.3839	196827	137772	128680	134938	0.354498	0.450386	167301	131810	-0.34398
1847	448.379	53.6494	52691.5	22395.8	65782.9	103857	0.191449	0.717947	37544.6	84821.1	1.17582
1848	783.577	55.1593	192140	104903	469816	626934	0.046971	1.32817	148523	548376	1.88448
1849	243.098	6.43652	100095	100446	60129.6	39270.1	0.0400112	1.39782	100271	49700.9	-1.01257
1850	240.968	63.4618	19300.1	16269.6	16744.3	19285.2	0.918078	0.0371204	17785.9	18015.7	0.0185259
1851	484.254	45.0382	422525	292839	93020.1	135104	0.0701629	1.15389	357683	114063	-1.64885
1852	202.05	48.5942	7288.27	9195.56	9299.05	15033.4	0.3236	0.489992	8242.92	12167.2	0.561771
1853	565.314	41.503	258495	137051	117512	127188	0.34127	0.466902	197774	122351	-0.692825
1854	411.218	50.9592	345357	334690	359112	534133	0.34807	0.458333	340025	446624	0.39342
1855	837.423	29.1877	124618	116030	500961	167119	0.328973	0.482839	120325	334041	1.47309
1856	951.454	50.0884	66571.3	103729	29429.2	38504.9	0.115854	0.936089	85151.1	33968.1	-1.32585
1857	159.116	39.5009	355399	172305	130501	114268	0.263617	0.579027	263853	122386	-1.1083
1858	570.22	48.938	101582	99928.6	155702	181609	0.0346543	1.46024	100756	168657	0.74322
1859	823.381	44.5407	6285.24	7973.07	87266.8	59233	0.0422639	1.37403	7130.15	73250.9	3.36084
1860	330.146	28.2911	563587	6.50563e+06	34943.8	0	0.358127	0.445963	3.53461e+06	17472.9	-7.66029
1861	1097.38	29.1889	447531	426322	222.885	773050	0.908395	0.0417252	436927	386638	-0.176412
1862	825.334	33.0508	135355	112454	50870.1	19471.5	0.0447595	1.34911	123905	35171.8	-1.81675
1863	454.375	53.1343	1.21568e+06	354059	315122	384779	0.420251	0.376492	784870	349952	-1.1653
1864	1099.39	29.189	78565.4	69330.5	0	128571	0.894582	0.04838	73948.9	64286.5	-0.202014
1865	445.255	51.0061	201775	168654	187577	285575	0.425344	0.371259	185216	236577	0.353102
1866	716.353	37.8536	842556	536722	1.00557e+06	1.05423e+06	0.159088	0.798364	689640	1.0299e+06	0.578592
1867	515.374	54.0245	209855	191130	119175	281284	0.997719	0.000991586	200494	200231	-0.00189487
1868	407.145	27.5251	389616	255022	31251.4	14971	0.0476866	1.3216	322320	23112.2	-3.80177
1869	981.313	37.71	149665	112252	142602	135668	0.709243	0.149205	130960	139136	0.0873714
1870	420.143	40.5693	115502	90073.3	220684	309372	0.072201	1.14146	102789	265029	1.36646
1871	220.178	43.5005	1.55994e+06	1.08589e+06	796369	466966	0.138922	0.85723	1.32292e+06	631669	-1.06648
1872	570.09	22.9339	287216	142611	45115.5	27167.8	0.1336	0.874194	214915	36142.7	-2.57199
1873	266.103	20.7759	932924	497331	9951.47	15236.5	0.0841658	1.07486	715129	12595	-5.82728
1874	946.306	33.1074	183004	187266	138731	64722.6	0.15332	0.8144	185136	101728	-0.863871
1875	156.567	34.1762	0	11354.7	47659	16850.3	0.246896	0.607487	5678.34	32255.6	2.50601
1876	801.393	35.5486	62198.6	97105.9	120405	198188	0.202664	0.693223	79653.2	159298	0.999919
1877	481.807	53.6708	32587.4	44906.4	621.435	0	0.024793	1.60567	38747.9	311.718	-6.95773
1878	95.0857	43.495	116214	80932.1	61359.6	43058.2	0.144846	0.839094	98574.2	52209.9	-0.916887
1879	784.58	55.1578	99062.2	52806.4	238335	320014	0.0494087	1.3062	75935.3	279175	1.87833
1880	432.166	28.2992	1.36985e+06	800356	526083	242404	0.158459	0.800084	1.0851e+06	384245	-1.49774
1881	674.377	35.7922	47069	48490.3	120967	72170.1	0.183665	0.735974	47780.6	96569.8	1.01515
1882	119.085	43.4964	211090	156768	113085	84841.2	0.108998	0.962583	183930	98964	-0.89418
1883	372.226	51.297	165605	128575	449280	306071	0.0893117	1.04909	147091	377676	1.36044
1884	702.863	62.501	220513	172200	201640	173997	0.788005	0.103471	196358	187820	-0.0641353
1885	203.173	43.499	235956	169296	123487	178880	0.357086	0.447227	202627	151184	-0.422517
1886	628.381	48.556	26517.7	18878.9	49525.7	30862.3	0.224849	0.648109	22699.3	40195	0.824369
1887	302.27	42.4485	267964	102548	93351.6	141711	0.51423	0.288842	185257	117533	-0.65647
1888	231.251	41.2974	254854	94686.2	89132.5	153717	0.59969	0.222073	174771	121426	-0.525391
1889	252.168	34.1519	1.66248e+06	1.12826e+06	733424	233504	0.130227	0.885298	1.39537e+06	483465	-1.52917
1890	470.167	38.2758	38185.6	36782.9	105933	144406	0.0449659	1.34712	37485.3	125170	1.7395
1891	385.139	37.5	476100	286203	204270	88170	0.169199	0.771602	381153	146221	-1.38222
1892	152.071	6.69213	102631	80447.8	928351	3.90705e+06	0.258733	0.587148	91540.3	2.4177e+06	4.72309
1893	476.133	31.8427	166727	115800	41666.8	35648.7	0.0571474	1.243	141264	38658.8	-1.86953
1894	845.349	37.7092	3.07304e+07	2.02089e+07	1.83933e+07	1.35605e+07	0.242737	0.614864	2.54696e+07	1.59769e+07	-0.672789
1895	202.167	39.9482	952617	629840	426079	264730	0.1321	0.879099	791230	345406	-1.1958
1896	93.07	43.495	110666	76991.3	52298.7	38791.8	0.116923	0.932099	93829.7	45546.3	-1.04271
1897	225.125	54.1703	121728	90663.5	94264	100864	0.64122	0.192993	106197	97565.1	-0.122299
1898	966.914	47.6955	5084.32	0	43091.3	37493.2	0.00988407	2.00506	2543.16	40293.2	3.98584
1899	717.356	37.8536	377040	231636	441762	464679	0.180425	0.743704	304339	453222	0.574538
1900	176.071	21.4227	141767	125907	165079	115093	0.833819	0.0789281	133838	140087	0.0658379
1901	348.109	27.0744	2.97911e+06	2.28807e+06	451366	149038	0.025142	1.5996	2.63359e+06	300203	-3.13302
1902	453.847	33.4893	626713	264742	905.536	188717	0.227383	0.643243	445729	94812.1	-2.23302
1903	227.071	28.3013	215015	151411	103595	53782.3	0.122504	0.91185	183214	78689.7	-1.21928
1904	149.096	32.5374	717603	434849	316312	102157	0.174391	0.758477	576227	209235	-1.46151
1905	568.568	53.5972	525058	115195	150496	164731	0.511126	0.291472	320128	157614	-1.02225
1906	908.248	37.4956	324928	218574	147167	71969.4	0.130438	0.884597	271752	109569	-1.31045
1907	1448.43	28.2865	51614	53098.7	57193.6	7901.41	0.506068	0.295791	52357.3	32548.5	-0.685799
1908	355.138	37.4844	179411	116186	80712.6	28069.4	0.151169	0.820537	147799	54392	-1.44217
1909	276.166	37.7771	418412	346281	186779	43483.1	0.0795107	1.09957	382347	115132	-1.73159
1910	201.164	39.9514	5.81295e+06	3.77404e+06	2.55121e+06	1.57156e+06	0.137017	0.863226	4.79349e+06	2.06138e+06	-1.21746
1911	400.141	37.4871	1.05296e+06	619243	446608	178219	0.176413	0.753469	836103	312415	-1.42022
1912	670.949	53.9571	23581	14544.6	22425.3	30793.7	0.345114	0.462037	19063.8	26610.5	0.481158
1913	284.296	54.2333	226765	207234	209287	218090	0.78647	0.104318	217000	213689	-0.0221816
1914	153.074	6.68781	29174.3	17263.8	91421.5	345941	0.264714	0.577222	23220	218682	3.2354
1915	491.239	28.3017	127609	101375	88219.1	51416.2	0.186679	0.728903	114493	69818.6	-0.713578
1916	887.42	45.8382	2.00963e+06	879145	767593	31139	0.261473	0.582572	1.44439e+06	399367	-1.85467
1917	501.207	28.2886	779481	387028	172900	141694	0.162914	0.788041	583256	157298	-1.89063
1918	202.167	43.5007	2.61681e+06	1.82305e+06	1.33312e+06	767026	0.138464	0.858662	2.21993e+06	1.05007e+06	-1.08003
1919	219.175	43.5005	9.87543e+06	6.86643e+06	4.981e+06	2.85555e+06	0.136861	0.86372	8.37093e+06	3.91828e+06	-1.09517
1920	1206.51	33.0989	101224	71595.5	21397.7	7447.26	0.0480404	1.31839	86410.8	14423.5	-2.58279
1921	908.349	19.7493	74125.6	71498.7	52971.2	40700.9	0.0536846	1.27015	72813.2	46837	-0.636549
1922	746.3	34.1665	0	1025.22	1392.93	15372.5	0.37816	0.422324	513.61	8383.73	4.02885
1923	357.349	49.0691	332905	180841	129770	173449	0.314734	0.502056	256874	151610	-0.760693
1924	451.254	35.5363	3.57114e+06	1.61631e+06	542102	807799	0.191165	0.718592	2.59373e+06	674952	-1.94217
1925	300.179	14.0213	645628	211053	1.71078e+06	2.04642e+06	0.0340199	1.46827	428342	1.8786e+06	2.13283
1926	327.253	53.1169	601863	317914	272413	307168	0.356402	0.44806	459890	289791	-0.666273
1927	704.525	54.1029	206603	140912	81535.5	97691.1	0.130658	0.883862	173758	89614.3	-0.95528
1928	492.26	40.9181	1.26494e+06	595181	394056	207515	0.211973	0.67372	930062	300786	-1.62859
1929	466.164	41.024	373116	190003	93312.5	71709.2	0.163476	0.786547	281561	82511.9	-1.77077
1930	626.368	53.8295	54169.1	13083.4	57563.3	161577	0.307333	0.51239	33627.2	109571	1.70416
1931	952.458	50.0902	44192.3	71394.9	24254.5	21334.3	0.124801	0.903783	57794.6	22795.4	-1.34219
1932	900.362	24.7009	129453	67933.3	81495.8	33984.4	0.402521	0.395211	98694.1	57741.1	-0.773365
1933	536.39	54.0109	149162	123654	137515	163329	0.52071	0.283404	136409	150423	0.141084
1934	220.061	37.488	352957	217354	153880	59994.9	0.163239	0.787175	285157	106938	-1.41498
1935	888.424	45.8382	1.06121e+06	470324	404845	17536.8	0.257011	0.590048	765766	211192	-1.85835
1936	150.026	49.874	129301	45856.6	32672	42863.4	0.357721	0.446456	87579.6	37768.7	-1.2134
1937	274.275	40.5247	654641	535612	8.81739e+06	1.17e+07	0.0215646	1.66626	595128	1.02587e+07	4.1075
1938	249.185	50.9584	296105	272732	295603	474028	0.380578	0.419557	284420	384816	0.436148
1939	790.249	55.3646	160896	58173.4	48288.3	53193.6	0.371278	0.430301	109536	50742	-1.11015
1940	397.328	54.1797	299897	344573	440067	470726	0.0389885	1.40906	322236	455398	0.499009
1941	477.249	43.724	1.4429e+06	884362	485774	223036	0.119857	0.921335	1.16363e+06	354406	-1.71516
1942	332.331	46.9709	158370	81494.9	81703	97139.9	0.517878	0.285772	119933	89422.5	-0.423524
1943	251.165	34.15	1.07605e+07	6.9935e+06	4.44728e+06	1.34517e+06	0.133824	0.873466	8.87699e+06	2.89623e+06	-1.6159
1944	901.472	47.7029	83263.1	57112.3	172852	42335.4	0.630681	0.20019	70188.7	107595	0.6163
1945	338.236	49.8727	324642	121301	126132	150969	0.496467	0.30411	222973	138551	-0.686447
1946	484.385	51.8582	2.35272e+06	962777	543803	554436	0.251726	0.599072	1.65775e+06	549121	-1.59403
1947	847.367	35.516	68786.6	126638	137752	150566	0.257475	0.589265	97713.4	144160	0.561043
1948	313.139	28.4913	336436	2.56906e+06	22497.2	31572.4	0.329772	0.481787	1.45275e+06	27035.8	-5.74777
1949	261.179	43.553	182703	151745	165778	235738	0.473123	0.325026	167225	200759	0.263672
1950	776.444	48.2372	322343	246234	21980.3	54617.1	0.0271831	1.5657	284289	38299.7	-2.89196
1951	349.113	27.0772	67344.8	42930.5	100575	131603	0.0908334	1.04175	55138.7	116090	1.07411
1952	384.136	37.4839	3.57251e+06	2.08279e+06	1.50286e+06	594301	0.178279	0.7489	2.82765e+06	1.04858e+06	-1.43117
1953	520.334	54.0505	115042	91540.1	26000	34024.4	0.0275332	1.56014	103292	30013.2	-1.78306
1954	450.226	44.9581	587497	717061	883962	915117	0.0655537	1.1834	652280	899541	0.463697
1955	899.359	24.7012	263990	130904	166210	77700.1	0.44455	0.35208	197448	121956	-0.695113
1956	410.349	53.1211	903369	272427	227934	278564	0.401185	0.396655	587899	253250	-1.21501
1957	445.361	54.0672	118926	112824	104957	109073	0.137777	0.860824	115876	107016	-0.114756
1958	889.315	28.3039	971898	743886	636011	370494	0.179931	0.744894	857893	503253	-0.769513
1959	330.265	48.1805	1.94909e+06	1.38296e+06	562798	486476	0.0572922	1.2419	1.66603e+06	524638	-1.66702
1960	720.333	35.2717	27633.8	26933.2	50815.1	5824.39	0.967448	0.0143723	27284.5	28320.8	0.0537783
1961	391.285	55.1449	707035	712955	4.19302e+06	4.87852e+06	0.00793142	2.10065	709996	4.53577e+06	2.67547
1962	406.354	40.8669	149898	7992.24	48073.6	61301.5	0.76598	0.115782	78946	54688.5	-0.529628
1963	275.278	40.2401	3.50627e+06	1.34181e+06	1.46541e+06	1.96127e+06	0.587644	0.230886	2.42404e+06	1.71334e+06	-0.500601
1964	127.049	6.4413	276469	285910	188824	116988	0.0713227	1.14677	281190	152907	-0.878891
1965	268.191	34.1956	2.03058e+07	1.30656e+07	8.54395e+06	2.02413e+06	0.144115	0.841291	1.66857e+07	5.28404e+06	-1.6589
1966	242.082	37.4878	354505	215491	158491	65483.2	0.174458	0.75831	284999	111988	-1.34761
1967	218.162	37.835	891446	599848	345237	135837	0.106489	0.972694	745648	240538	-1.63223
1968	217.159	37.8134	5.63922e+06	3.66265e+06	2.09674e+06	793774	0.113582	0.944692	4.65094e+06	1.44526e+06	-1.6862
1969	998.462	48.949	232085	167000	131118	84061.3	0.149188	0.826267	199543	107591	-0.891149
1970	298.072	37.4924	3.16364e+06	1.91598e+06	1.386e+06	543652	0.171484	0.765775	2.53981e+06	964829	-1.39637
1971	499.217	31.6684	0	2154.43	48746.9	25647.6	0.0895039	1.04816	1078.22	37198.2	5.10851
1972	501.221	44.3299	192355	130521	107795	55731.7	0.187462	0.727086	161439	81764.6	-0.981443
1973	264.233	35.0106	2.38573e+06	2.00632e+06	713409	354196	0.0238216	1.62303	2.19602e+06	533804	-2.04051
1974	282.124	19.6413	134701	84702.9	26737	9281.17	0.0742274	1.12944	109703	18010.1	-2.60673
1975	420.24	41.475	3.22025e+06	1.58444e+06	316486	284296	0.123933	0.906814	2.40235e+06	300392	-2.99952
1976	371.363	44.5612	292292	7750.52	32124	42739	0.511929	0.29079	150022	37432.5	-2.00281
1977	640.338	50.3782	24752.3	30390	52539.2	65466.5	0.0468246	1.32953	27572.2	59003.9	1.0976
1978	707.414	51.3012	9046.7	15956.7	25133.1	32301.7	0.0827266	1.08235	12502.7	28718.4	1.19973
1979	364.119	37.4933	2.86458e+07	1.8705e+07	1.35133e+07	4.95168e+06	0.158612	0.799665	2.36754e+07	9.23247e+06	-1.3586
1980	383.133	37.4842	2.23464e+07	1.35901e+07	9.66675e+06	3.58446e+06	0.167172	0.776837	1.79682e+07	6.6256e+06	-1.43932
1981	175.111	31.6164	279705	197942	111761	88855.4	0.0824879	1.08361	238825	100309	-1.2515
1982	201.164	43.502	1.63822e+07	1.15737e+07	8.48498e+06	4.74781e+06	0.136835	0.863803	1.39779e+07	6.6164e+06	-1.07903
1983	401.144	37.4943	267946	161123	108789	40896.9	0.157997	0.80135	214535	74844.2	-1.51925
1984	427.271	35.5313	749655	310067	100011	155469	0.211161	0.675387	529862	127741	-2.05239
1985	527.276	47.6782	8.8294e+06	3.48522e+06	1.88483e+06	1.63436e+06	0.241902	0.616361	6.15731e+06	1.7596e+06	-1.80706
1986	362.326	46.0957	99484.2	78773.8	27012.2	63194.2	0.169073	0.771926	89130	45104.2	-0.98265
1987	150.112	62.8866	1.10483e+06	752773	676042	504987	0.226031	0.645831	928803	590515	-0.653398
1988	450.251	35.5337	1.30117e+07	5.65036e+06	1.85836e+06	2.72316e+06	0.197864	0.703632	9.33105e+06	2.29076e+06	-2.02621
1989	902.283	28.3039	307998	242642	208782	124819	0.178192	0.749113	275321	166801	-0.722983
1990	470.369	50.1453	519672	134509	212702	242430	0.657669	0.181993	327092	227567	-0.523406
1991	111.08	29.4488	104372	63916	42527.8	21319	0.149533	0.825263	84144.9	31924.4	-1.39822
1992	406.293	54.1657	127608	119389	80705.3	76004.7	0.0108202	1.96577	123500	78356	-0.65639
1993	1175.51	41.513	19997.2	23432.6	28461.4	38711.9	0.159229	0.797977	21715.9	33587.6	0.629177
1994	410.341	54.182	172079	181188	232180	245405	0.0162794	1.78836	176634	238793	0.434997
1995	807.428	45.4437	32755.7	5119.43	38444.6	18738.4	0.626828	0.202852	18938.6	28592.5	0.594308
1996	412.222	50.9527	102334	95405.5	102763	154057	0.371931	0.429538	98871	128411	0.377153
1997	778.322	36.6243	0	430.41	135037	89009.5	0.0398551	1.39952	216.205	112024	9.0172
[truncated: 3,084 more rows]

## Sheet: ΔlaeB
Supplementary Table 3 - High-resolution mass spectrometry data of Aspergillus fumigatus mutant strains.
Total ions (5081)
	m/Z	Re time	A. fumigatus CEA17.1-1	A. fumigatus CEA17.1-2	ΔlaeB-1	ΔlaeB-2	A. fumigatus CEA17.1vsΔlaeB_p value	A. fumigatus CEA17.1vsΔlaeB_-log10(p value)	A. fumigatus CEA17.1_mean+1	ΔlaeB_mean+1	A. fumigatus CEA17.1vsΔlaeB_log2foldchange
1	688.313	37.6715	330494	234747	172415	87623	0.139721	0.85474	282622	130020	-1.12014
2	905.396	36.5466	88927.2	50670.5	57805.9	62412	0.664926	0.177227	69799.9	60110	-0.21562
3	461.246	47.7134	4.83047e+06	3.07618e+06	2.27516e+06	1.78228e+06	0.169033	0.772029	3.95333e+06	2.02872e+06	-0.962498
4	429.221	47.7131	1.56487e+06	1.05625e+06	1.17253e+06	659348	0.388722	0.410361	1.31056e+06	915941	-0.516858
5	299.14	39.7056	106545	62980.5	41516.4	27906	0.159564	0.797066	84763.7	34712.2	-1.288
6	357.162	42.902	104937	50172.1	26480.9	32330.8	0.222497	0.652676	77555.4	29406.8	-1.39908
7	259.127	16.4194	27475.9	40344.3	31555.7	28039.3	0.600344	0.2216	33911.1	29798.5	-0.18652
8	1422.67	47.6929	62872.7	47285.5	36344.3	26332.8	0.12444	0.905039	55080.1	31339.5	-0.813548
9	579.284	47.6745	88688.1	68086.6	61939.9	58103.6	0.22173	0.654175	78388.4	60022.7	-0.38513
10	467.135	42.9524	229888	135713	126803	99609.8	0.291464	0.535416	182801	113208	-0.691307
11	1421.67	47.6919	169104	127144	101903	76622.8	0.138162	0.859611	148125	89263.7	-0.730668
12	328.193	36.2261	172203	128383	101241	95462.6	0.143153	0.844199	150294	98352.8	-0.611749
13	1074.42	47.6743	79250.1	67207.5	45918.4	39681	0.046243	1.33495	73229.8	42800.7	-0.774796
14	239.092	16.8087	71693.6	48546	32112.3	34485	0.147608	0.83089	60120.8	33299.6	-0.852358
15	258.124	36.2249	125990	88859.7	68968.8	67012.1	0.167969	0.774772	107426	67991.5	-0.659915
16	528.127	19.7517	106911	115903	72398.7	45845.6	0.0649494	1.18742	111408	59123.2	-0.91406
17	667.454	39.5818	27980.4	26538.7	17143.6	16059.9	0.00708261	2.14981	27260.5	16602.8	-0.715391
18	346.137	33.1074	108222	72212.3	41130.8	30664.7	0.101357	0.994146	90218.3	35898.7	-1.32949
19	637.346	48.5504	57559.3	50924	53819.4	33541	0.426519	0.370062	54242.7	43681.2	-0.312416
20	1201.54	47.6911	87529.5	54671.7	44324.6	40724.6	0.225946	0.645996	71101.6	42525.6	-0.741549
21	326.151	35.8777	6.41033e+06	4.45538e+06	3.55405e+06	3.21241e+06	0.174868	0.75729	5.43286e+06	3.38323e+06	-0.68331
22	636.317	49.9627	60260.1	61915.3	19807.9	31645.7	0.0273972	1.56229	61088.7	25727.8	-1.24758
23	988.269	37.5137	25162.2	17396.7	17195.1	9626.58	0.283805	0.54698	21280.4	13411.8	-0.666022
24	300.132	39.163	99580.9	49919.5	92824.8	40406.4	0.842665	0.0743449	74751.2	66616.6	-0.166215
25	1420.67	47.6887	340154	244518	197906	154750	0.157551	0.80258	292337	176329	-0.729361
26	459.241	47.6904	4.35093e+07	4.03295e+07	3.01828e+07	2.69466e+07	0.0276615	1.55812	4.19194e+07	2.85647e+07	-0.553386
27	501.232	25.0814	419587	311607	131808	50471	0.0556395	1.25462	365598	91140.5	-2.00409
28	1419.66	47.691	376589	265014	227278	174034	0.19139	0.718082	320803	200657	-0.676956
29	270.125	36.2126	97143.2	68223	52803.2	44001.5	0.15145	0.819731	82684.1	48403.4	-0.772502
30	117.054	2.83797	62578.9	52939.9	37883.6	32887.9	0.05413	1.26656	57760.4	35386.8	-0.706872
31	282.28	54.392	243160	222922	88960.7	135302	0.0410544	1.38664	233042	112132	-1.05539
32	573.162	55.0049	0	6184.81	6716.98	10480	0.267631	0.572464	3093.4	8599.49	1.47506
33	327.154	36.216	1.34065e+06	942576	758858	686444	0.174179	0.759004	1.14161e+06	722652	-0.659698
34	464.184	32.8277	239728	131416	76639.5	64683.9	0.169443	0.770976	185573	70662.7	-1.39296
35	247.061	20.1762	217640	140328	48956.6	115338	0.197729	0.703931	178985	82148.5	-1.12353
36	354.145	25.7513	99493.3	47796.1	11965.8	22280.5	0.165199	0.781993	73645.7	17124.1	-2.10457
37	476.193	36.2238	109545	56593.5	73810.6	56857.2	0.588793	0.230037	83070	65334.9	-0.346474
38	430.221	47.7681	328250	211529	261591	228488	0.721772	0.1416	269890	245040	-0.139355
39	336.172	49.9884	839096	358479	101006	182849	0.20176	0.695164	598788	141928	-2.07689
40	1073.42	47.675	133291	105254	82593	63405.8	0.112479	0.948927	119273	73000.4	-0.708295
41	443.239	47.6883	359316	262464	95190.1	169078	0.0991394	1.00375	310891	132135	-1.23439
42	1202.04	47.6927	121349	78098.2	67901.5	57819.9	0.238766	0.622027	99724.4	62861.7	-0.665766
43	500.203	25.0897	1.5019e+06	1.06091e+06	431476	148768	0.0632583	1.19888	1.2814e+06	290123	-2.14299
44	689.317	37.7045	64384.3	43265.2	55272.2	42868.4	0.73527	0.133553	53825.7	49071.3	-0.133416
45	248.173	47.6748	101101	68463.1	40238.1	33470.6	0.102637	0.988696	84782.9	36855.3	-1.2019
46	627.251	19.755	0	0	0	0	#DIV/0!	#DIV/0!	1	1	0
47	142.065	36.2199	44396.5	30161	21246	21381.7	0.154114	0.812157	37279.8	21314.9	-0.806531
48	226.123	12.2528	26116.5	18730.7	18296.7	16071.7	0.307248	0.51251	22424.6	17185.2	-0.383915
49	299.14	45.7225	21031.1	81716.7	46729.8	24795.7	0.676284	0.169871	51374.9	35763.8	-0.522566
50	666.192	19.7501	0	0	0	0	#DIV/0!	#DIV/0!	1	1	0
51	265.015	63.3923	23292.5	19351.4	22147.9	18507	0.746433	0.127009	21322.9	20328.4	-0.0689091
52	963.44	47.6883	138633	98799.5	107789	101556	0.558108	0.253282	118717	104674	-0.181631
53	237.185	42.6325	274881	166795	167506	143725	0.359761	0.443986	220839	155617	-0.505
54	331.106	31.6886	85238.5	72914	16132.8	16789.6	0.00957369	2.01892	79077.2	16462.2	-2.26411
55	835.309	38.5059	94124.3	44760.7	5594.34	5765.2	0.122833	0.910684	69443.5	5680.77	-3.61168
56	873.242	36.4815	17255.2	13071.8	3308.46	15878	0.488888	0.310791	15164.5	9594.22	-0.660461
57	279.948	64.0776	43841.1	39595.5	36015.6	37080.8	0.142	0.847712	41719.3	36549.2	-0.190876
58	567.335	51.3408	428013	237245	237178	197791	0.358626	0.445358	332630	217485	-0.613
59	1220.56	48.5524	20077.2	5293.48	5513.77	4047.95	0.398746	0.399304	12686.3	4781.86	-1.40763
60	356.162	42.9371	644463	192271	86079.1	108152	0.291656	0.535129	418368	97116.4	-2.10699
61	582.326	57.0341	12347.2	0	7600.61	18758	0.488446	0.311183	6174.62	13180.3	1.09396
62	444.68	19.7501	0	0	0	0	#DIV/0!	#DIV/0!	1	1	0
63	257.593	33.1131	0	0	489.507	0	0.42265	0.374019	1	245.754	7.94107
64	497.303	52.9519	254950	121601	110794	105373	0.352457	0.452894	188277	108084	-0.800695
65	959.43	47.6803	124952	82397.1	60367.2	56313.8	0.167987	0.774725	103676	58341.5	-0.829483
66	653.229	19.7475	0	0	0	0	#DIV/0!	#DIV/0!	1	1	0
67	237.079	33.1135	4707.79	9258.22	10972.5	11171.3	0.21443	0.668714	6984	11072.9	0.664905
68	256.264	54.2378	67796.8	67918.7	38610.2	52723.3	0.0879843	1.05559	67858.8	45667.7	-0.57136
69	809.389	50.0452	40529.2	34182.9	12056.5	12914.8	0.016175	1.79116	37357	12486.7	-1.58099
70	668.199	19.7501	0	0	0	0	#DIV/0!	#DIV/0!	1	1	0
71	662.137	22.9303	42503.2	51722.3	31983.3	22405.9	0.0956494	1.01932	47113.7	27195.6	-0.792773
72	519.133	39.239	0	0	1412.36	731.919	0.0876592	1.0572	1	1073.14	10.0676
73	986.365	19.7635	0	15050.1	0	0	0.42265	0.374019	7526.03	1	-12.8777
74	1023.29	28.2871	107686	190254	141125	127734	0.761273	0.11846	148971	134431	-0.14817
75	918.379	19.7501	0	0	0	0	#DIV/0!	#DIV/0!	1	1	0
76	462.178	32.8277	2.04145e+06	927251	1.43999e+06	1.19412e+06	0.796963	0.0985617	1.48435e+06	1.31706e+06	-0.172518
77	199.087	34.489	131713	220570	352489	292667	0.111786	0.951614	176143	322579	0.872907
78	561.205	51.3027	27183.4	22964	29516.2	24434	0.622959	0.205541	25074.7	26976.1	0.105449
79	623.194	19.7475	0	0	0	0	#DIV/0!	#DIV/0!	1	1	0
80	904.323	19.7501	0	0	0	0	#DIV/0!	#DIV/0!	1	1	0
81	797.238	36.4753	68077.7	0	57714.8	61108.7	0.534174	0.272317	34039.9	59412.7	0.803547
82	196.112	42.6176	178814	76339.5	18293.6	28103.7	0.179761	0.745304	127578	23199.6	-2.4592
83	569.147	38.454	12022.7	10162.2	10020	19487.7	0.527133	0.27808	11093.4	14754.9	0.411487
84	622.195	19.7538	0	0	0	252.534	0.42265	0.374019	1	127.267	6.99171
85	738.275	39.2415	6043.85	4275.58	1863.59	570.508	0.0692568	1.15954	5160.72	1218.05	-2.083
86	932.352	29.9349	25619.2	16293.3	4058.18	4189	0.068915	1.16169	20957.2	4124.59	-2.34513
87	506.949	64.0865	38792.1	39659.3	40714.2	41414.2	0.080887	1.09212	39226.7	41065.2	0.0660813
88	652.227	19.7467	0	11347.7	0	0	0.42265	0.374019	5674.87	1	-12.4704
89	237.572	46.2983	0	663.547	0	243.041	0.612161	0.213134	332.774	122.521	-1.44152
90	965.273	37.3193	76983.5	46351.5	17729	13947.8	0.0971478	1.01257	61668.5	15839.4	-1.96102
91	934.356	19.7501	0	0	0	0	#DIV/0!	#DIV/0!	1	1	0
92	836.312	38.6151	36792.8	0	5688.42	4349.82	0.542961	0.265231	18397.4	5020.12	-1.87371
93	1033.31	16.9856	5748.48	9006.71	5466.5	11091	0.807599	0.0928042	7378.59	8279.76	0.166242
94	216.566	33.1135	0	440.91	1026.73	0	0.6524	0.185486	221.455	514.366	1.21578
95	931.349	29.9284	138787	13927.2	5697.34	7364	0.379709	0.420549	76358.1	6531.67	-3.54726
96	282.204	44.8861	78939.7	62451.6	27640.6	30496	0.0381039	1.41903	70696.6	29069.3	-1.28214
97	714.37	37.0167	22989.9	19199.8	21587.3	21374.1	0.85771	0.0666593	21095.9	21481.7	0.0261504
98	655.243	19.7538	0	0	0	0	#DIV/0!	#DIV/0!	1	1	0
99	636.75	37.7341	21114.7	2706.54	275.672	0	0.329256	0.482466	11911.6	138.836	-6.42284
100	443.954	64.0436	20520.9	22017.9	19631.8	23342.7	0.923229	0.0346905	21270.4	21488.3	0.0147018
101	855.409	48.7405	59059.2	34857.9	18967.6	14565.1	0.133506	0.8745	46959.5	16767.4	-1.48576
102	842.357	39.2376	2326.72	1696.94	296.109	0	0.0331334	1.47973	2012.83	149.054	-3.75531
103	824.292	34.5987	470.314	1984.35	41234.3	35982.6	0.00530202	2.27556	1228.33	38609.5	4.97418
104	240.161	22.5976	74922.5	48395.8	9673.14	7144.34	0.0572766	1.24202	61660.1	8409.74	-2.8742
105	658.237	22.8494	1358.94	298.563	5456.45	3747.34	0.0642672	1.19201	829.754	4602.9	2.47179
106	543.417	51.7936	229507	62663.2	235260	159403	0.632277	0.199093	146086	197332	0.433812
107	1417.47	34.5012	0	0	8268.87	4913.77	0.0590916	1.22847	1	6592.32	12.6866
108	222.193	46.5117	58668.8	51421.9	17334.3	13502.4	0.01053	1.97757	55046.3	15419.3	-1.8359
109	913.022	34.4876	0	207.227	2657.28	4543.87	0.066392	1.17788	104.614	3601.58	5.10548
110	945.266	28.2992	500891	374852	270178	178044	0.111495	0.952746	437872	224112	-0.966291
111	824.343	39.2376	4903.23	7389.46	686.284	615.982	0.0475892	1.32249	6147.35	652.133	-3.23673
112	1108.43	46.2977	2806.39	749.563	609.355	0	0.303273	0.518166	1778.98	305.678	-2.54097
113	531.139	37.2713	52934.2	807.091	16233.3	36718.6	0.990035	0.00434953	26871.6	26477	-0.0213467
114	1421.45	34.5025	0	0	18592.1	19100.7	0.000182006	3.73991	1	18847.4	14.2021
115	1043.29	37.3002	41882.6	31179.6	38969	64162.2	0.386558	0.412785	36532.1	51566.6	0.497272
116	746.379	50.0064	82603.2	59441.6	11258.1	11956.3	0.0359857	1.44387	71023.4	11608.2	-2.61315
117	586.246	19.7501	0	0	0	0	#DIV/0!	#DIV/0!	1	1	0
118	826.36	39.2415	4768.41	4431.72	494.787	874.016	0.0041671	2.38017	4601.06	685.401	-2.74695
119	905.326	19.7538	0	0	0	0	#DIV/0!	#DIV/0!	1	1	0
120	825.295	34.6046	220.274	613.776	23818.6	18739.4	0.0145824	1.83617	418.025	21280	5.66976
121	399.164	42.0072	616360	428989	425113	321963	0.297866	0.525979	522675	373539	-0.484657
122	153.058	2.82865	164076	197428	76323.2	45269.2	0.0342378	1.46549	180753	60797.2	-1.57194
123	242.119	42.8714	35348	24059.1	13230.4	14618.2	0.109053	0.962364	29704.6	13925.3	-1.09298
124	266.184	44.8861	157350	126495	41476.5	47102	0.0248415	1.60482	141923	44290.2	-1.68005
125	336.167	24.5716	2.22114e+06	1.62978e+06	702643	476777	0.0518214	1.28549	1.92546e+06	589711	-1.70713
126	374.148	48.8353	123351	67343.5	25511.7	78653.5	0.378901	0.421474	95348.2	52083.6	-0.872376
127	270.113	43.0221	92479.1	72191.8	98580.3	175572	0.302889	0.518716	82336.5	137077	0.735384
128	1420.45	34.5025	0	276.951	21574.5	19818	0.00186515	2.72929	139.475	20697.2	7.21328
129	239.2	42.1174	28987	15720.4	13440.6	16521.7	0.392134	0.406566	22354.7	14982.2	-0.577332
130	200.148	32.1736	114822	37722.9	25411.9	20492.9	0.301513	0.520695	76273.4	22953.4	-1.73247
131	1382.45	34.501	0	0	37385.7	25798.2	0.0320258	1.4945	1	31592.9	14.9473
132	479.133	33.1135	0	1490.88	3066.35	700.992	0.501062	0.300108	746.438	1884.67	1.33622
133	337.17	24.5712	426006	305126	141330	97523.8	0.0619443	1.208	365567	119428	-1.614
134	398.161	42.0074	2.49483e+06	1.71223e+06	1.75796e+06	1.32701e+06	0.335967	0.473703	2.10353e+06	1.54249e+06	-0.447555
135	919.382	19.7475	0	0	0	0	#DIV/0!	#DIV/0!	1	1	0
136	1383.45	34.495	0	0	17486.5	14091.6	0.0113611	1.94458	1	15790.1	13.9467
137	710.309	49.9482	40334.2	23163.2	22514.5	17489.6	0.319571	0.495433	31749.7	20003.1	-0.66652
138	809.328	37.3201	63873.8	42694.4	14633.3	17985.3	0.0747732	1.12625	53285.1	16310.3	-1.70795
139	1356.48	34.4865	0	0	16807.4	16235.1	0.000299843	3.52311	1	16522.3	14.0121
140	463.181	32.8277	611676	90807.1	411540	348423	0.922766	0.0349083	351243	379982	0.113465
141	773.374	48.5354	33338.9	12727.1	15079.3	14787.4	0.514278	0.288802	23034	14934.4	-0.625127
142	621.192	19.7496	0	5698.14	0	0	0.42265	0.374019	2850.07	1	-11.4768
143	951.945	47.6917	70144.2	47359.2	44394.2	39740	0.287779	0.540941	58752.7	42068.1	-0.481928
144	1046.29	34.5008	0	564.13	138887	148286	0.00107743	2.96761	283.065	143588	8.98658
145	257.066	2.91506	33343.8	24002.6	33827.8	34301	0.368165	0.433958	28674.2	34065.4	0.248556
146	234.086	22.3994	35166.5	22572.6	43702.9	45316.8	0.13273	0.87703	28870.5	44510.8	0.624558
147	587.244	19.7609	0	0	0	0	#DIV/0!	#DIV/0!	1	1	0
148	1355.48	34.4865	0	0	59966.3	51115.9	0.0062882	2.20147	1	55542.1	15.7613
149	1045.28	34.5006	0	956.106	227275	247260	0.00178007	2.74956	479.053	237268	8.95212
150	1067.4	47.6803	41285.2	32916	10482.8	7392.87	0.0241812	1.61652	37101.6	8938.81	-2.05333
151	442.232	47.9093	1.44783e+06	881629	708845	498324	0.204298	0.689737	1.16473e+06	603585	-0.948366
152	1927.63	34.489	0	0	28235.4	23086.4	0.00991623	2.00365	1	25661.9	14.6473
153	225.991	63.4152	44819.9	38934.9	34186.2	35548.7	0.146042	0.835522	41878.4	34868.5	-0.264285
154	944.469	47.7078	336706	243876	114675	72968	0.0610047	1.21464	290292	93822.7	-1.6295
155	173.961	63.2885	63012.1	59231.9	67160.2	64093	0.205429	0.687339	61123	65627.6	0.102587
156	1094.49	39.4643	5106.41	3922.12	248.453	0	0.0184699	1.73353	4515.27	125.227	-5.1722
157	533.292	46.5859	348363	210551	267767	250816	0.798808	0.0975577	279458	259292	-0.108053
158	667.196	19.7526	0	13936.2	0	0	0.42265	0.374019	6969.1	1	-12.7668
159	1121.23	37.4808	38017.2	40686.6	41040.4	24391.5	0.513679	0.289308	39352.9	32717	-0.266431
160	1354.47	34.4865	0	0	171546	153787	0.00296633	2.52778	1	162667	17.3116
161	369.154	35.6705	149115	115424	58097.2	42891.4	0.0474699	1.32358	132271	50495.3	-1.38927
162	484.237	47.8837	299797	217260	314664	268029	0.560292	0.251586	258529	291347	0.172413
163	366.135	42.0065	1.87639e+06	1.3238e+06	1.33849e+06	1.01984e+06	0.317723	0.497952	1.6001e+06	1.17916e+06	-0.440395
164	1352.47	34.4876	0	0	431273	357679	0.00858936	2.06604	1	394477	18.5896
165	1353.47	34.4865	0	0	377091	322428	0.00605101	2.21817	1	349761	18.416
166	217.107	16.8145	291594	131594	50854.4	60957.5	0.191597	0.717611	211595	55907	-1.9202
167	1378.97	34.501	0	210.05	16088.5	11282.4	0.0299686	1.52333	106.025	13686.5	7.0122
168	1379.97	34.501	0	0	34218.5	19146.6	0.0713367	1.14669	1	26683.6	14.7037
169	515.099	36.4878	280276	166493	44546.9	49527.9	0.090365	1.044	223385	47038.4	-2.24762
170	1131.39	34.5008	0	0	95152.1	79350.4	0.00810024	2.0915	1	87252.2	16.4129
171	147.08	47.6846	160364	111004	72639.2	61708.5	0.113435	0.945253	135685	67174.8	-1.01427
172	943.466	47.6986	1.10732e+06	802165	355996	235758	0.0567333	1.24616	954746	295878	-1.69012
173	1132.39	34.5003	0	0	42200.8	34058.7	0.0112082	1.95047	1	38130.8	15.2187
174	427.213	47.6905	2.75605e+07	1.94835e+07	1.2708e+07	1.07454e+07	0.104963	0.978965	2.3522e+07	1.17267e+07	-1.00421
175	910.311	34.4884	4024.13	13929.4	1.35975e+06	1.11925e+06	0.00943108	2.02544	8977.78	1.2395e+06	7.10918
176	911.314	34.4877	0	5421.17	415288	344447	0.00875529	2.05773	2711.59	379868	7.13022
177	1926.63	34.4879	0	0	35569.5	34295.2	0.000332533	3.47817	1	34933.3	15.0923
178	909.309	34.4891	12838	22231.9	2.39764e+06	1.99953e+06	0.0082313	2.08453	17536	2.19859e+06	6.97012
179	312.947	64.0832	78161.7	79365.6	84417.3	97323.4	0.202712	0.693121	78764.6	90871.3	0.206278
180	1043.27	34.501	0	0	37600.8	35273.1	0.0010187	2.99195	1	36438	15.1532
181	127.111	47.6782	163820	107961	72894.3	64215.2	0.140099	0.853565	135891	68555.7	-0.987106
182	367.138	42.0065	446501	311582	321678	242812	0.341093	0.467127	379042	282246	-0.425405
183	288.179	32.1979	17698.6	11988.7	77817.2	86643.4	0.00602891	2.21976	14844.7	82231.3	2.46974
184	800.238	36.4655	1776.42	4284.39	3480.23	4083.46	0.619081	0.208253	3031.4	3782.85	0.319486
185	912.317	34.4876	369.917	587.957	102356	86329.1	0.00721143	2.14198	479.937	94343.7	7.61894
186	436.155	41.4729	42076.6	37619.8	20510.7	16978.3	0.0176746	1.75265	39849.2	18745.5	-1.08801
187	386.154	36.1012	82819.3	54423.6	2247.56	3650.27	0.0437979	1.35855	68622.5	2949.92	-4.53993
188	1200.48	39.2536	13039.2	7266.13	0	0	0.0721905	1.14152	10153.7	1	-13.3097
189	651.224	19.7491	37561.5	64964.2	0	0	0.0645924	1.18982	51263.9	1	-15.6457
190	1181.26	34.5025	0	820.909	22810	23340.6	0.000464653	3.33287	411.455	23076.3	5.80953
191	247.17	47.6803	532242	355134	226889	200138	0.123879	0.907004	443689	213515	-1.05521
192	187.148	47.6848	369258	257270	163235	142676	0.106368	0.973187	313265	152956	-1.03426
193	663.428	34.1695	59914.1	51662	31326.6	27951.8	0.0278531	1.55513	55789.1	29640.2	-0.912428
194	958.428	47.6748	165955	112669	89948.8	74738.1	0.176078	0.754296	139313	82344.4	-0.758591
195	1125.5	39.3908	17754.1	10404.2	0	0	0.0618759	1.20848	14080.2	1	-13.7814
196	716.327	31.2039	32576.8	22905.7	1157.16	212.735	0.0307657	1.51193	27742.3	685.948	-5.33784
197	1011.23	36.4976	0	0	6699.28	17243.5	0.151167	0.820543	1	11972.4	13.5474
198	1223.53	38.2932	5178.01	12264.9	0	0	0.132937	0.876354	8722.46	1	-13.0905
199	137.046	3.20643	115100	199055	377632	326156	0.0583478	1.23398	157079	351895	1.16366
200	597.195	46.3059	0	4322.95	2607.71	1430.39	0.955091	0.0199553	2162.47	2020.05	-0.0982895
201	700.367	36.2408	351153	367782	450057	321736	0.722488	0.14117	359469	385898	0.102353
202	1381.45	34.501	0	0	24149	19034.8	0.013737	1.86211	1	21592.9	14.3983
203	358.154	49.9829	76302.1	45091.8	37703.7	84658.7	0.987855	0.00530663	60698	61182.2	0.0114633
204	427.16	34.4836	103388	28497.7	1.03449e+06	853525	0.0122101	1.91328	65943.6	944008	3.83949
205	143.085	47.6876	403314	273078	182891	143383	0.123683	0.90769	338197	163138	-1.05177
206	668.209	46.4012	67255.3	43830.3	25697.3	24470.5	0.121774	0.914446	55543.8	25084.9	-1.14681
207	662.192	19.7526	0	0	0	0	#DIV/0!	#DIV/0!	1	1	0
208	237.185	40.7037	198507	225503	240840	192438	0.88259	0.054241	212006	216640	0.0311892
209	203.576	28.556	0	0	339.855	480.988	0.0283128	1.54802	1	411.421	8.68447
210	825.356	39.2402	39283.5	25958.7	458.886	448.422	0.0403205	1.39447	32622.1	454.654	-6.16494
211	1124.5	39.3876	28275.9	16005.9	427.383	0	0.0702215	1.15353	22141.9	214.691	-6.68837
212	217.07	2.88419	95208.8	82349.2	89655.8	100276	0.53543	0.271297	88780	94966.9	0.0971903
213	1196.38	34.5012	365.862	0	5941.25	3653.86	0.0576068	1.23953	183.931	4798.56	4.70537
214	240.077	34.4876	10077	8036.35	28709.7	26664	0.00596024	2.22474	9057.69	27687.9	1.61204
215	339.182	22.4793	24904.5	17921.9	53891.9	57451.2	0.012833	1.89167	21414.2	55672.6	1.3784
216	1199.03	47.6908	75614.1	49230.4	37594.8	31778.8	0.176455	0.753365	62423.3	34687.8	-0.847656
217	529.175	54.6061	7832.65	15141.2	11294.8	30205	0.457281	0.339817	11487.9	20750.9	0.853058
218	737.271	39.2436	35340.7	30996.8	1016.63	204.458	0.00457419	2.33969	33169.7	611.544	-5.76127
219	444.168	34.4891	913081	1.3196e+06	1.64194e+07	1.33873e+07	0.0120861	1.91771	1.11634e+06	1.49033e+07	3.73879
220	863.349	35.4692	1400.36	1941.83	37937.8	34238.2	0.00293762	2.532	1672.09	36089	4.43183
221	933.208	36.4932	0	0	8658.33	14798	0.0621897	1.20628	1	11729.2	13.5178
222	591.18	45.8391	172707	132530	56029.3	49177.2	0.0390985	1.40784	152619	52604.3	-1.53669
223	460.243	47.6883	2.31758e+07	1.55205e+07	1.01887e+07	8.50854e+06	0.125349	0.901881	1.93481e+07	9.34861e+06	-1.04937
224	701.37	36.2364	91319.3	99517	112795	87202.1	0.765667	0.11596	95419.2	99999.7	0.0676443
225	946.267	28.295	218839	159719	115333	74635.8	0.119441	0.922846	189280	94985.2	-0.994746
226	200.09	34.4876	20935.9	15808.2	60381.9	53745.6	0.0115424	1.93771	18373	57064.8	1.63501
227	234.135	16.8146	139119	63341.3	28761.8	32690.6	0.204228	0.689884	101231	30727.2	-1.72006
228	1078.43	48.0941	45248.3	26448.6	34847.9	16703.3	0.521312	0.282902	35849.4	25776.6	-0.475888
229	478.13	33.1065	38033.8	51666.5	7696.89	3112.42	0.0316677	1.49938	44851.1	5405.66	-3.0526
230	967.267	34.5001	0	2608.15	95182.7	71128.3	0.0211543	1.6746	1305.07	83156.5	5.99362
231	1051.32	37.2713	0	567.678	0	10473.6	0.444647	0.351985	284.839	5237.79	4.20074
232	1015.5	48.6102	49290	50888	11378.1	7436.79	0.00272116	2.56525	50090	9408.45	-2.41249
233	491.299	53.6526	166821	144661	177376	178427	0.183799	0.735657	155742	177903	0.191933
234	968.27	34.5003	0	850.3	59293.9	45077.4	0.0184057	1.73505	426.15	52186.7	6.93618
235	266.184	47.6803	276518	188295	123280	107700	0.120766	0.918054	232408	115491	-1.00887
236	287.176	32.1668	30001.9	28279	370723	407359	0.00258623	2.58733	29141.4	389042	3.73878
237	426.157	34.489	273863	356307	3.75139e+06	3.07432e+06	0.011904	1.92431	315086	3.41286e+06	3.43716
238	877.256	36.4793	0	0	10002.1	24695.9	0.142086	0.84745	1	17350	14.0826
239	369.095	19.7568	0	0	812.624	1590.44	0.0907337	1.04223	1	1202.53	10.2319
240	699.364	36.2436	700411	753349	935185	693226	0.553781	0.256662	726881	814207	0.163676
241	446.173	34.4865	98644.3	104888	829694	568258	0.0447435	1.34927	101767	698977	2.77997
242	116.071	2.55437	80084.4	103952	40938.9	44303.5	0.0546874	1.26211	92019.1	42622.2	-1.11033
243	876.254	36.4767	0	0	58416.5	88079.9	0.0386397	1.41297	1	73249.2	16.1605
244	875.251	36.4793	0	641.411	109463	166181	0.0400061	1.39787	321.705	137823	8.74286
245	445.17	34.4878	262711	377461	4.27831e+06	3.52908e+06	0.0109998	1.95862	320087	3.9037e+06	3.6083
246	925.291	34.4865	5472.64	5544.81	19067	22176.8	0.0104255	1.9819	5509.73	20622.9	1.9042
247	532.262	42.4415	299673	212791	274548	366284	0.416547	0.380336	256233	320417	0.322495
248	566.26	19.7476	0	16019.2	0	0	0.42265	0.374019	8010.62	1	-12.9677
249	945.279	37.2801	0	0	338.268	11258.9	0.399533	0.398447	1	5799.57	12.5017
250	265.18	47.6826	1.59705e+06	1.03871e+06	683530	572009	0.13624	0.865696	1.31788e+06	627770	-1.06991
251	350.14	35.6749	364301	284438	141469	117301	0.0428591	1.36796	324371	129386	-1.32596
252	367.138	40.5739	81358.4	49744.4	84182.2	62089	0.732074	0.135445	65552.4	73136.6	0.157946
253	581.323	57.04	52439.1	28684.9	44677.2	62120	0.475526	0.322825	40563	53399.6	0.396664
254	434.141	38.8824	33034.6	36736.3	15442.3	8729.2	0.0271188	1.56673	34886.4	12086.7	-1.52924
255	216.147	47.6803	658477	433527	281165	236134	0.129181	0.888801	546003	258651	-1.0779
256	1340.48	33.1066	19441.3	27147.1	0	0	0.0262834	1.58032	23295.2	1	-14.5077
257	498.175	36.2192	101534	702.814	2517.84	4284.94	0.443869	0.352745	51119.6	3402.39	-3.90926
258	1229.38	36.4767	0	0	18178.5	30774.8	0.0602847	1.21979	1	24477.7	14.5792
259	441.955	64.0865	35424.4	32892	38602.4	39881.1	0.0698044	1.15612	34159.2	39242.7	0.200152
260	933.359	29.9409	43225.1	32657.2	2182.5	698.274	0.020708	1.68386	37942.1	1441.39	-4.71827
261	476.194	38.0366	111726	54063	280762	197833	0.0903576	1.04404	82895.5	239298	1.52944
262	799.236	36.4815	0	0	22289.4	28247.7	0.0136172	1.86591	1	25269.6	14.6251
263	1039.27	34.5008	0	0	25331.9	20483.2	0.011016	1.95797	1	22908.5	14.4836
264	513.337	51.7867	381241	105518	110565	107182	0.43216	0.364355	243381	108874	-1.16055
265	905.356	42.3186	1760.05	973.178	1689.28	7038.88	0.383027	0.416771	1367.61	4365.08	1.67435
266	1227.38	36.4767	0	0	61301.6	95976	0.0453263	1.34365	1	78639.8	16.263
267	207.175	45.6957	42232	29879.5	25051.2	40179	0.758247	0.120189	36056.8	32616.1	-0.144686
268	153.954	1.97126	9073.19	9324.11	7758.04	6676.88	0.0702898	1.15311	9199.65	7218.46	-0.349887
269	350.14	33.6961	222636	161537	75340.6	59111	0.0585181	1.23271	192087	67226.8	-1.51465
270	739.302	36.4598	465823	310984	1.75117e+06	2.518e+06	0.0466915	1.33076	388404	2.13459e+06	2.45833
271	1228.38	36.4767	0	0	43563.2	72330.2	0.0564466	1.24836	1	57947.7	15.8225
272	476.159	34.4878	10477.2	10771.2	55557.2	42060.5	0.0298557	1.52497	10625.2	48809.9	2.19968
273	324.098	19.7476	33361.2	26836.6	3468.7	10384.6	0.0396058	1.40224	30099.9	6927.64	-2.11932
274	400.167	41.999	110523	76914.3	79059.3	58080.5	0.331983	0.478885	93719.5	68570.9	-0.450753
275	743.287	36.4767	2733.68	2288.99	241.619	2961.08	0.576851	0.238937	2512.33	1602.35	-0.64884
276	740.291	36.4598	226895	157355	871060	1.2209e+06	0.040963	1.38761	192126	1.04598e+06	2.44473
277	480.145	36.6661	35597.5	29408.7	842.735	207.344	0.00933026	2.03011	32504.1	526.04	-5.9493
278	728.313	19.7513	0	0	0	0	#DIV/0!	#DIV/0!	1	1	0
279	1585.52	36.4772	0	0	1624.65	11803.7	0.31788	0.497737	1	6715.16	12.7132
280	1044.3	37.2867	0	0	18389.6	36459.2	0.0935519	1.02895	1	27425.4	14.7432
281	1586.52	36.4772	0	0	0	12187.9	0.42265	0.374019	1	6094.96	12.5734
282	1158.52	39.2363	17174.8	9153.82	226.292	0	0.0829183	1.08135	13165.3	114.146	-6.84972
283	649.266	48.5581	45601.2	35588.2	54814.2	55894.2	0.0993544	1.00281	40595.7	55355.2	0.447392
284	422.353	51.7936	40719.6	16480.6	58168.9	48017.8	0.203322	0.691816	28601.1	53094.3	0.892486
285	554.937	64.0436	22295.5	20415.9	21289.8	25248	0.474604	0.323669	21356.7	23269.9	0.123777
286	219.113	22.7961	570928	344728	162117	122397	0.110828	0.955349	457829	142258	-1.6863
287	1921.69	34.4866	0	0	17895.4	7499.3	0.134576	0.871033	1	12698.4	13.6324
288	525.1	47.0222	36978.3	28486.8	34814.8	30643.3	0.99948	0.000225747	32733.5	32730.1	-0.000153229
289	1923.68	34.4866	0	0	28984.9	16990.8	0.061815	1.20891	1	22988.9	14.4886
290	971.28	34.5035	1734.68	4398.69	9828.38	14117	0.0717951	1.14391	3067.69	11973.7	1.96464
291	286.311	43.0931	78236	54530.7	56623.8	15145.7	0.32988	0.481644	66384.3	35885.7	-0.887432
292	494.102	33.1081	979.964	16287.8	6228.78	2200.97	0.632774	0.198752	8634.87	4215.88	-1.03434
293	239.967	63.4724	101068	89925.2	90343	100698	0.997775	0.000967369	95497.4	95521.3	0.000361489
294	233.154	47.6772	3.8769e+06	2.52862e+06	1.70488e+06	1.46801e+06	0.142083	0.847458	3.20276e+06	1.58645e+06	-1.01352
295	196.112	46.1473	35466.2	26989.4	17933.6	21997.9	0.138821	0.857546	31228.8	19966.7	-0.645278
296	428.216	47.6848	7.82655e+06	5.08466e+06	3.29536e+06	2.75545e+06	0.133495	0.874536	6.45561e+06	3.02541e+06	-1.09342
297	942.462	47.6962	4.27975e+06	3.06291e+06	1.34528e+06	919318	0.0588274	1.23042	3.67133e+06	1.1323e+06	-1.69705
298	149.059	47.6802	352274	245058	162958	151488	0.119748	0.921731	298667	157224	-0.925719
299	798.24	36.4815	675.239	3850.91	27199.3	29404.4	0.00546621	2.26231	2264.07	28302.8	3.64395
300	230.093	37.2844	48107.5	1856.99	81072.7	96354.2	0.120257	0.91989	24983.3	88714.5	1.82821
301	1922.69	34.4876	0	0	46625.6	26493.3	0.068151	1.16653	1	36560.5	15.158
302	882.315	37.3807	684263	636102	600901	552637	0.134214	0.872201	660183	576770	-0.194871
303	869.238	36.4857	0	0	21489.5	30110.9	0.0267986	1.57189	1	25801.2	14.6552
304	359.152	36.4781	367547	378681	2.01925e+07	2.0145e+07	1.51926e-06	5.81837	373115	2.01687e+07	5.75636
305	361.157	36.4742	22158.2	12174.8	596970	617291	0.000367976	3.43418	17167.5	607132	5.14426
306	360.154	36.4761	116891	99311.2	4.74647e+06	4.72183e+06	1.07009e-05	4.97058	108102	4.73415e+06	5.45264
307	362.16	36.4788	2868.12	1206.6	70224.1	69850.4	0.000156771	3.80474	2038.36	70038.3	5.10266
308	747.382	50.0044	45771.5	30734.1	10606.8	9763.86	0.0650409	1.18681	38253.8	10186.3	-1.90897
309	870.243	36.4932	0	0	1324.09	7405.74	0.287646	0.541141	1	4365.92	12.0921
310	409.299	50.3657	268220	74624.4	95987.7	66962.6	0.45513	0.341865	171423	81476.1	-1.07311
311	477.196	38.0339	34993.4	1355.68	79471.3	55441.4	0.139917	0.85413	18175.5	67457.3	1.89198
312	131.049	47.6893	662387	448074	288811	250084	0.119674	0.922	555232	269449	-1.04308
313	378.173	25.4942	255401	245269	128346	90670.8	0.0186521	1.72927	250336	109509	-1.19281
314	255.15	13.6164	26320.2	18495.6	123506	76882.8	0.0812463	1.0902	22408.9	100195	2.16067
315	915.345	37.2743	53099.6	81096.3	457242	831219	0.0913308	1.03938	67099	644231	3.26322
316	883.317	37.4095	214149	223729	194160	175951	0.0811307	1.09081	218940	185056	-0.242567
317	914.342	37.2717	154235	230807	1.4843e+06	2.7292e+06	0.0917614	1.03734	192522	2.10675e+06	3.45192
318	913.339	37.2717	267947	431492	2.62127e+06	4.9361e+06	0.0979658	1.00893	349720	3.77869e+06	3.43361
319	881.312	37.3848	1.32339e+06	1.21972e+06	1.13776e+06	1.03617e+06	0.126014	0.899581	1.27155e+06	1.08696e+06	-0.226289
320	1339.47	33.1113	55074.8	60302.8	218.215	242.999	0.00206337	2.68542	57689.8	231.607	-7.96049
321	215.143	47.6826	4.07106e+06	2.59122e+06	1.72127e+06	1.44812e+06	0.146025	0.835572	3.33114e+06	1.5847e+06	-1.07181
322	945.459	47.6896	457321	312390	144671	107010	0.0743588	1.12867	384856	125841	-1.61271
323	1859.66	34.4852	0	0	0	210.815	0.42265	0.374019	1	106.407	6.73345
324	234.157	47.6777	613113	398904	280921	246203	0.155017	0.809621	506009	263563	-0.941016
325	393.143	25.1953	68946.8	35254.2	82421.6	47719.7	0.645409	0.190165	52101.5	65071.6	0.320705
326	916.347	37.2767	5762.24	20635.8	113585	195372	0.0767245	1.11507	13200	154480	3.54881
327	255.149	32.6036	39790.8	24356.2	15448.2	29028.5	0.439642	0.356901	32074.5	22239.4	-0.528311
328	446.9	34.4877	1680.49	4824.84	28445.9	22613.5	0.0214091	1.6694	3253.67	25530.7	2.9721
329	878.812	63.4325	47270.9	53029.1	15295.1	33322	0.111996	0.950797	50151	24309.6	-1.04475
330	734.333	36.3799	0	534.885	184805	155086	0.00758463	2.12007	268.442	169947	9.30625
331	798.324	31.8612	16783.6	26162.2	35674.7	7510.48	0.994298	0.00248356	21473.9	21593.6	0.00801917
332	409.202	47.6826	4.46423e+06	3.12041e+06	1.91335e+06	1.65613e+06	0.0991499	1.00371	3.79232e+06	1.78474e+06	-1.08737
333	366.135	40.5761	324370	187118	344157	244343	0.694469	0.158347	255745	294251	0.202339
334	129.069	47.6904	205849	136658	91669.8	80623.5	0.135776	0.867179	171254	86147.6	-0.991257
335	1338.47	33.1097	72439.4	81948.9	485.557	0	0.00380598	2.41953	77195.1	243.779	-8.30679
336	381.133	36.4828	28590.2	35692.7	1.93841e+06	2.26928e+06	0.00631922	2.19934	32142.5	2.10385e+06	6.0324
337	197.132	47.6814	1.09899e+06	702933	457981	383016	0.139952	0.854022	900964	420500	-1.09937
338	378.144	42.9164	4715.62	35521.1	27898.4	36719.1	0.526207	0.278844	20119.4	32309.7	0.683384
339	178.059	47.6785	238216	163146	105629	88080.2	0.114617	0.940749	200682	96855.5	-1.05101
340	290.011	14.6422	2126.58	3184.86	3231.18	8734	0.356982	0.447354	2656.72	5983.59	1.17136
341	296.113	22.5582	80763.7	19183.6	172088	203919	0.0576555	1.23916	49974.7	188004	1.9115
342	348.171	36.8431	3.15257e+06	1.38188e+06	620538	644891	0.206173	0.685767	2.26723e+06	632716	-1.8413
343	732.328	36.3929	12213.1	28960.5	1.48462e+06	1.23356e+06	0.00871907	2.05953	20587.8	1.35909e+06	6.04471
344	281.178	48.9478	73377.3	33348.8	27745.5	35691.7	0.399966	0.397976	53364	31719.6	-0.750493
345	363.147	35.9949	13810.3	14612.8	22388.5	17496.5	0.14693	0.832891	14212.6	19943.5	0.488749
346	691.503	50.5413	155475	37464.1	47531.4	47355.1	0.493439	0.306766	96470.6	47444.3	-1.02386
347	823.34	39.2414	31219.5	38886	442.448	0	0.0119348	1.92319	35053.7	222.224	-7.30141
348	398.11	36.4709	0	0	6537.43	19107.2	0.178144	0.749229	1	12823.3	13.6465
349	1077.43	48.0995	162642	97569.7	113060	63569.1	0.414135	0.382858	130107	88315.3	-0.558959
350	125.096	47.6893	1.02153e+06	657888	430811	381655	0.141972	0.847797	839710	406234	-1.04758
351	297.117	22.5582	9496.18	12899.2	32648.4	36310.6	0.0113314	1.94572	11198.7	34480.5	1.62245
352	709.305	49.9458	72949.3	42539.8	20666.6	31977.7	0.192359	0.715888	57745.6	26323.1	-1.13338
353	301.071	22.5567	94434.9	72388.8	85112.6	103659	0.525746	0.279224	83412.8	94386.6	0.178313
354	459.075	36.5091	0	0	9803.43	33893.4	0.211365	0.674967	1	21849.4	14.4153
355	391.181	47.6727	163749	109397	66786	57224.3	0.113988	0.943142	136574	62006.2	-1.1392
356	941.459	47.6905	1.74261e+07	1.22307e+07	5.16565e+06	3.58145e+06	0.0613335	1.2123	1.48284e+07	4.37355e+06	-1.76149
357	741.305	36.3834	100001	77175.6	222603	312871	0.0613782	1.21199	88589.5	267738	1.59562
358	1357.46	34.4852	0	0	0	0	#DIV/0!	#DIV/0!	1	1	0
359	374.362	50.8216	85633.5	64563.5	30967.1	43867.1	0.0927558	1.03266	75099.5	37418.1	-1.00507
360	369.205	47.1963	207400	81694.9	98175.7	72057.6	0.452291	0.344582	144548	85117.6	-0.764021
361	751.314	32.795	3233.31	1915.73	7028.5	6429.68	0.0290239	1.53724	2575.52	6730.09	1.38576
362	630.354	36.1873	32074.2	34241	506.451	1421.9	0.00133204	2.87548	33158.6	965.177	-5.10244
363	976.314	37.2752	0	0	0	3596.14	0.42265	0.374019	1	1799.07	10.813
364	733.331	36.3708	1605.11	9897.89	727251	594408	0.010164	1.99294	5752.5	660831	6.84395
365	109.065	47.6802	453713	290488	197607	166955	0.149591	0.825095	372101	182282	-1.02952
366	165.074	16.8259	74540	57303	157479	124321	0.0568603	1.24519	65922.5	140901	1.09584
367	443.103	36.4945	0	0	42495.6	63623.2	0.0374271	1.42681	1	53060.4	15.6953
368	983.42	48.1315	71427.9	56751.3	63414.4	51303.2	0.552619	0.257574	64090.6	57359.8	-0.160072
369	671.329	49.9723	62449.4	26349.2	15282.7	13509.2	0.238745	0.622066	44400.3	14397	-1.62481
370	975.309	37.279	0	0	9629.18	24821.5	0.151488	0.819622	1	17226.4	14.0723
371	906.398	36.5432	0	0	33026.3	31602.8	0.000484835	3.31441	1	32315.5	14.9799
372	190.972	1.98945	8909.66	10417	8731.97	9501.28	0.58444	0.23326	9664.35	9117.62	-0.0840154
373	468.123	28.5292	0	5268	1376.01	3475.98	0.9482	0.0231003	2635	2426.99	-0.118631
374	469.127	28.5718	532.982	664.15	1839.32	2009.77	0.00651314	2.18621	599.566	1925.55	1.68328
375	971.299	37.2867	0	524.625	66894.6	83596.3	0.012189	1.91403	263.312	75246.4	8.1587
376	972.281	34.501	0	1267.18	799.049	1596.53	0.529702	0.275968	634.591	1198.79	0.917677
377	499.231	45.3636	308266	191731	135219	124076	0.176078	0.754294	250000	129648	-0.947324
378	461.946	47.6785	135609	89755.1	60064.6	49516.2	0.132983	0.876205	112683	54791.4	-1.04025
379	558.893	64.061	25166	26562.2	28424.6	31292.6	0.129228	0.888642	25865.1	29859.6	0.207189
380	195.065	47.6887	1.41268e+06	892328	568652	489875	0.141411	0.849518	1.1525e+06	529264	-1.12271
381	1075.43	48.1073	703260	410178	487150	257582	0.426371	0.370212	556720	372367	-0.580226
382	1047.32	34.501	0	728.193	75166.2	51036.4	0.03508	1.45494	365.096	63102.3	7.43327
383	91.0544	47.6876	566909	365750	239842	203575	0.139051	0.856824	466330	221710	-1.07268
384	208.178	45.698	5313.36	4617.29	5565.18	9150.75	0.320402	0.494305	4966.33	7358.97	0.567324
385	199.148	37.7822	700371	457818	100852	185967	0.0770951	1.11297	579096	143410	-2.01365
386	669.2	19.7512	0	0	0	0	#DIV/0!	#DIV/0!	1	1	0
387	141.091	47.6848	358012	229971	158860	132290	0.151249	0.820307	293993	145576	-1.01401
388	449.12	36.507	0	608.464	40041.3	63489	0.0482122	1.31684	305.232	51766.2	7.40596
389	241.967	63.4769	22479	15136.8	17161.8	17486.2	0.725429	0.139405	18808.9	17325	-0.118562
390	553.938	64.0865	140326	144137	152273	180309	0.231104	0.636193	142232	166292	0.225466
391	1076.43	48.103	420493	244234	293947	154584	0.437492	0.35903	332365	224267	-0.56755
392	946.463	47.6929	171875	128996	57336	39471.3	0.0481076	1.31779	150436	48404.6	-1.63594
393	153.025	63.4101	211476	178878	185745	195231	0.808305	0.0924246	195178	190489	-0.0350822
394	605.248	19.6329	15498.4	8096.04	280.522	5296.44	0.181479	0.741173	11798.2	2789.48	-2.0805
395	1050.32	37.2837	0	666.681	38386.8	60252.7	0.0464134	1.33336	334.341	49320.7	7.20473
396	320.205	28.8396	1.11716e+06	908169	790707	515218	0.172982	0.762	1.01267e+06	652964	-0.633085
397	279.088	22.5586	51338	45561.5	248669	281800	0.00596311	2.22453	48450.7	265235	2.45268
398	969.46	38.2903	68645.7	55996.5	0	0	0.0101427	1.99385	62322.1	1	-15.9275
399	1097.56	47.7829	58973.5	40858.9	63171.2	49592.8	0.625488	0.203781	49917.2	56383	0.175722
400	1143.6	49.0854	42077.1	32571.1	960.531	1854.1	0.0172121	1.76417	37325.1	1408.31	-4.72811
401	1371.4	28.2895	93926.4	76848.5	17885	0	0.0251773	1.59899	85388.5	8943.48	-3.25513
402	177.055	47.6826	2.21976e+06	1.40552e+06	907328	792227	0.143985	0.841682	1.81265e+06	849779	-1.09294
403	447.186	29.9373	15710	10723.7	238238	275504	0.00590026	2.22913	13217.8	256872	4.28049
404	432.139	33.1291	27214.4	12260.3	3106.56	918.789	0.143617	0.842796	19738.3	2013.67	-3.2931
405	444.108	36.5161	0	425.376	523.306	8401.73	0.394032	0.404468	213.688	4463.52	4.3846
406	311.97	64.0421	21015.5	16946.9	19294	18125.7	0.909721	0.0410918	18982.2	18710.8	-0.0207706
407	912.327	37.1354	1609.91	289.558	3085.47	6666.5	0.17591	0.754709	950.732	4876.99	2.35888
408	507.175	34.4943	4498.51	9382.87	47590	42639.8	0.00819464	2.08647	6941.69	45115.9	2.70028
409	647.477	50.491	144546	38183.9	51080.9	52072.5	0.53239	0.27377	91365.7	51577.7	-0.824906
410	271.145	22.4636	35954.9	36843.2	147047	161673	0.00383497	2.41624	36400	154361	2.0843
411	446.183	29.9373	37021	20720	840046	961217	0.00488134	2.31146	28871.5	900632	4.96322
412	555.936	64.0769	44800.8	42848	46649.7	54699.5	0.239954	0.619873	43825.4	50675.6	0.209523
413	947.209	47.69	56247	35992.4	2311.01	0	0.0477394	1.32112	46120.7	1156.51	-5.31757
414	83.0139	47.6751	164451	110639	70783.7	58471.2	0.118376	0.926735	137546	64628.4	-1.08967
415	233.081	22.4042	23070.4	28221.1	258776	287017	0.00335329	2.47453	25646.7	272898	3.41151
416	198.136	47.6768	188002	116415	76923.3	66170.6	0.155663	0.807816	152209	71548	-1.08907
417	485.327	51.3258	529887	163183	367915	287595	0.929426	0.0317853	346536	327756	-0.080385
418	1005.39	42.1601	955.233	257.953	25929.4	21326.7	0.0100681	1.99705	607.593	23629	5.28131
419	728.272	48.5506	35719.1	37399.7	59691.2	57758.8	0.00332069	2.47877	36560.4	58726	0.683717
420	1081.28	33.1066	2366.35	19378.7	197.934	243.534	0.337069	0.472281	10873.5	221.734	-5.61584
421	618.327	41.6602	30201.4	34793	12694.8	19847.9	0.0622662	1.20575	32498.2	16272.3	-0.997937
422	735.334	36.3581	0	0	34224.5	24787.3	0.0246338	1.60847	1	29506.9	14.8488
423	807.263	36.4953	0	1159.16	0	260.512	0.528371	0.277061	580.582	131.256	-2.14511
424	590.257	19.7463	3.28677e+06	3.08633e+06	751376	394777	0.00606918	2.21687	3.18655e+06	573077	-2.47519
425	750.311	32.7959	2923.04	2363.99	13838.8	12601.6	0.00409393	2.38786	2644.51	13221.2	2.32178
426	241.096	22.7983	16894	49731.1	62982.5	55949.2	0.259641	0.585627	33313.6	59466.8	0.835975
427	1064.57	46.593	43727.7	30740.6	32566.9	29458.8	0.449821	0.346961	37235.2	31013.8	-0.263754
428	707.315	36.3346	54327.2	40862.7	23071.7	26601.8	0.0821605	1.08534	47596	24837.8	-0.938304
429	387.963	64.058	17913.5	19458.1	18867.1	21123.5	0.439236	0.357302	18686.8	19996.3	0.0977139
430	1264.63	48.9811	0	0	0	0	#DIV/0!	#DIV/0!	1	1	0
431	560.361	37.9178	68159.2	47248.6	46604.8	35258.4	0.293952	0.531724	57704.9	40932.6	-0.495444
432	895.367	37.2841	0	0	37324.4	43122.3	0.00515412	2.28785	1	40224.4	15.2958
433	345.135	33.1306	1329.07	4450.69	119866	91740.8	0.0183824	1.7356	2890.88	105804	5.19375
434	717.317	39.4966	137129	71185.6	217.519	422.476	0.0877577	1.05671	104158	320.998	-8.342
435	972.303	37.2837	0	759.023	45268	50179.3	0.00274314	2.56175	380.512	47724.7	6.97065
436	562.303	44.0205	293986	175725	185374	156734	0.404362	0.39323	234857	171055	-0.457318
437	1017.28	37.4414	1466.34	7662.36	23535.3	21805.1	0.0301404	1.52085	4565.35	22671.2	2.31206
438	508.255	41.078	415825	282330	25381.1	71287.8	0.0509127	1.29317	349078	48335.5	-2.8524
439	589.254	19.7475	9.27572e+06	8.74075e+06	2.00142e+06	1.03167e+06	0.00541927	2.26606	9.00823e+06	1.51655e+06	-2.57045
440	219.566	36.4975	0	0	10805.7	27978.8	0.152455	0.816858	1	19393.3	14.2433
441	412.863	63.5754	88794.3	80444.5	84472	89821.1	0.660934	0.179842	84620.4	87147.6	0.0424554
442	1096.56	47.7857	73751.7	55358.6	85028.4	67361.2	0.457711	0.339409	64556.2	76195.8	0.239157
443	591.26	19.7466	665017	622438	162590	87304.9	0.00687739	2.16258	643728	124949	-2.36512
444	159.116	31.1669	278453	180655	98343.3	71347.8	0.104056	0.982733	229555	84846.5	-1.43591
445	349.175	36.839	741747	339722	201893	164820	0.218682	0.660187	540735	183357	-1.56027
446	563.307	44.0272	116497	69031.3	68471.3	64408.1	0.384252	0.415384	92765.1	66440.7	-0.481514
447	748.331	39.4164	110559	59950	0	610.561	0.0784445	1.10544	85255.6	306.28	-8.1208
448	747.328	39.41	210445	117553	209.437	0	0.0717724	1.14404	164000	105.718	-10.5993
449	408.958	64.0865	110346	100825	96684.6	85838.2	0.185565	0.731504	105586	91262.4	-0.210329
450	750.346	38.9599	148818	114109	1039.97	678.154	0.0172036	1.76438	131464	860.06	-7.25602
451	280.091	22.5605	5412.34	6811.78	42403.5	50139.5	0.00944473	2.02481	6113.06	46272.5	2.92019
452	475.23	50.0902	122559	96176.6	154701	116954	0.369389	0.432517	109369	135828	0.312586
453	909.434	39.1616	10135.4	14201.3	2250.48	873.33	0.0385973	1.41344	12169.4	1562.9	-2.96095
454	360.237	54.1674	32042.3	33583	47534.6	40180.4	0.0988445	1.00505	32813.6	43858.5	0.418561
455	319.202	28.8532	5.70336e+06	4.54083e+06	3.97378e+06	2.49172e+06	0.182676	0.738319	5.1221e+06	3.23275e+06	-0.663974
456	468.138	42.945	1279.25	1455.46	37043.6	27657.1	0.0221927	1.65379	1368.35	32351.3	4.56331
457	371.4	55.9309	66289.1	86266.2	84643.8	80268	0.607115	0.216729	76278.6	82456.9	0.112361
458	421.347	51.7936	30344.8	15758.2	148518	117025	0.0241135	1.61774	23052.5	132772	2.52596
459	466.149	34.5008	37942.5	125964	1.3261e+06	1.24353e+06	0.00250724	2.6008	81954.2	1.28482e+06	3.9706
460	718.321	39.4998	70263.9	38335.4	942.221	948.624	0.0790569	1.10206	54300.7	946.422	-5.84234
461	842.342	37.7167	88351.6	48154.7	493.022	240.197	0.0775901	1.11019	68254.2	367.61	-7.5366
462	424.929	64.0865	84872.7	80445.1	94070	104123	0.0958636	1.01835	82659.9	99097.6	0.261663
463	471.287	51.3009	9.81607e+06	5.32869e+06	7.56908e+06	6.48713e+06	0.835521	0.0780429	7.57238e+06	7.02811e+06	-0.10761
464	749.344	38.9481	294017	213289	486.511	458.046	0.0244872	1.61106	253654	473.278	-9.06596
465	1222.53	38.2874	31521.4	39406.6	0	0	0.0121346	1.91597	35465	1	-15.1141
466	744.356	38.2527	15726.2	13069.3	63041.8	39275.1	0.0915129	1.03852	14398.8	51159.5	1.82906
467	939.271	37.4528	0	1838.04	20974.8	17041.9	0.0140947	1.85095	920.02	19009.3	4.3689
468	282.907	63.5623	139698	114490	127348	118143	0.776661	0.109768	127095	122747	-0.0502189
469	472.29	51.3026	2.7881e+06	1.55172e+06	2.15687e+06	1.88461e+06	0.835627	0.0779876	2.16991e+06	2.02074e+06	-0.102755
470	267.196	45.6772	46613	387319	439432	614177	0.246998	0.607307	216967	526805	1.27979
471	590.334	47.6803	285261	202256	153646	133897	0.143793	0.842261	243759	143773	-0.761667
472	196.069	47.6899	162736	101488	65291.8	59017.6	0.150977	0.821089	132113	62155.7	-1.08782
473	1033.51	46.5303	3749.87	10035.6	1056.6	701.167	0.196257	0.707175	6893.76	879.883	-2.96991
474	511.225	29.349	67585.2	45570.9	6052.62	8235.08	0.0465946	1.33166	56579.1	7144.85	-2.98529
475	512.192	36.0967	9069.53	5993.18	80501	73202	0.00324823	2.48835	7532.35	76852.5	3.35092
476	445.151	42.9485	29206.8	22885.6	385880	251365	0.0490937	1.30897	26047.2	318623	3.61265
477	861.353	36.2556	10161.7	17791.2	48134.1	25780.4	0.19107	0.718807	13977.5	36958.3	1.40279
478	737.38	50.0017	71044.4	65046.1	7079.74	6030.39	0.00244284	2.61211	68046.2	6556.07	-3.37561
479	771.375	36.4978	22656.4	25309.5	890.51	929.105	0.00328978	2.48283	23983.9	910.807	-4.71878
480	777.576	53.7011	102956	52111.6	67697.9	66934.1	0.726651	0.138674	77534.8	67317	-0.203874
481	473.293	51.3039	510339	292951	396278	343151	0.802202	0.095716	401646	369715	-0.119509
482	375.146	32.0857	4582.46	5371.14	128977	118337	0.00201432	2.69587	4977.8	123658	4.6347
483	542.821	63.5837	48920.2	51512.2	54854.6	58134.7	0.0952673	1.02106	50217.2	56495.6	0.169958
484	325.202	41.4479	616151	468544	241416	193882	0.0525666	1.27929	542349	217650	-1.31721
485	326.269	45.6772	25156	19501	36967.2	64006.5	0.178342	0.748746	22329.5	50487.8	1.17699
486	398.161	40.5739	344008	270395	468880	344167	0.303768	0.517458	307203	406525	0.404153
487	950.944	47.6907	166899	110117	128496	113350	0.610283	0.214469	138509	120924	-0.19588
488	485.163	32.8271	33623.8	24730.7	70497.7	73571.8	0.011837	1.92676	29178.3	72035.8	1.30382
489	186.053	16.8267	30112.9	18831.5	79203	67973	0.0252676	1.59744	24473.2	73589	1.58829
490	324.136	28.6115	80376.9	319730	23004.9	29731.8	0.283942	0.54677	200054	26369.3	-2.92346
491	565.256	19.7501	53255.5	64125.7	0	0	0.00846709	2.07227	58691.6	1	-15.8409
492	894.366	37.2817	0	252.815	146330	167042	0.00434748	2.36176	127.407	156687	10.2642
493	876.802	63.4325	152547	180377	33660.5	15257.5	0.0135217	1.86897	166463	24460	-2.7667
494	880.3	34.4356	6700.16	15867.4	42364.4	23722.8	0.171176	0.766558	11284.8	33044.6	1.55004
495	1001.23	28.3026	98911	43257.1	66806.5	47437	0.682281	0.166037	71085.1	57122.7	-0.315481
496	513.211	41.0791	372637	262924	27979.2	77125.4	0.0477156	1.32134	317781	52553.3	-2.59618
497	393.239	41.4473	731614	437924	261709	204304	0.143091	0.844388	584770	233008	-1.32749
498	743.353	38.2462	53363.2	40247.2	128665	74294.7	0.189751	0.721816	46806.2	101481	1.11643
499	423.217	48.1481	258198	115383	156074	101444	0.527086	0.278118	186792	128760	-0.536744
500	961.269	60.1983	393786	362277	241684	246104	0.0137766	1.86086	378032	243895	-0.632248
501	1370.4	28.2994	171245	136922	39735.8	17173.3	0.0256991	1.59008	154085	28455.6	-2.43694
502	838.319	42.9364	909.148	309.907	4343.07	5799.39	0.029761	1.52635	610.528	5072.23	3.05449
503	557.122	42.0041	78125.5	73415.7	18494.5	16089.4	0.00203825	2.69074	75771.6	17292.9	-2.13147
504	480.85	63.5606	34675.6	30968.2	29845.4	26127.9	0.206826	0.684395	32822.9	27987.6	-0.229913
505	391.177	20.2549	12223.9	9002.91	4910.05	3703.17	0.0669781	1.17407	10614.4	4307.61	-1.30106
506	205.987	63.3011	25102.6	24949.3	26550.1	29514	0.180043	0.744623	25026.9	28033.1	0.163647
507	260.09	24.2157	108960	86960.8	15030.4	20737.7	0.01955	1.70885	97961.3	17885.1	-2.45346
508	1143.36	34.3244	0	0	5963.41	4321.48	0.0245518	1.60992	1	5143.44	12.3285
509	1007.38	34.3578	0	0	84260.2	47558.2	0.069534	1.1578	1	65910.2	16.0082
510	1094.91	36.4815	0	0	1830.12	6390.97	0.213245	0.671122	1	4111.54	12.0055
511	827.311	36.5034	0	688.117	7489.67	10350.8	0.0281949	1.54983	345.059	8921.24	4.69233
512	714.337	32.2325	31684.7	22627.1	878.666	0	0.0278013	1.55593	27156.9	440.333	-5.94658
513	569.147	34.501	958.76	3466.26	31496.5	34466.7	0.00396625	2.40162	2213.51	32982.6	3.8973
514	938.509	48.0273	130672	28205.9	18328.8	6456.57	0.323259	0.490449	79439.7	12393.7	-2.68025
515	770.372	36.4924	97475.9	93480.8	688.995	213.067	0.000447842	3.34888	95479.3	452.031	-7.72262
516	949.485	48.6638	123350	271722	7624.51	5211.66	0.123424	0.908602	197537	6419.09	-4.94361
517	468.165	37.2597	1.59171e+06	1.64763e+06	4.22415e+06	5.04568e+06	0.0181385	1.7414	1.61967e+06	4.63492e+06	1.51684
518	950.489	48.6638	82826.1	173275	1883.66	3130.73	0.10898	0.962652	128051	2508.2	-5.67393
519	893.364	37.2829	0	0	614897	702884	0.00442849	2.35374	1	658891	19.3297
520	1008.38	34.3564	0	0	47763.9	26546.6	0.0727393	1.13823	1	37156.3	15.1813
521	727.268	48.5524	81563	85478.7	142698	137923	0.00294331	2.53116	83521.8	140311	0.748408
522	119.047	16.8151	6663.33	2043.62	25056.8	14016.7	0.126511	0.897872	4354.48	19537.7	2.16569
523	796.979	64.0636	22026	21341.4	21686.2	19027.8	0.435714	0.360799	21684.7	20358	-0.0910842
524	1063.57	46.5724	59763.1	40992.3	45447.1	41838.3	0.554009	0.256484	50378.7	43643.7	-0.20704
525	469.168	37.2597	414062	438097	1.1638e+06	1.35347e+06	0.0129275	1.88848	426080	1.25864e+06	1.56266
526	892.361	37.2837	0	0	1.98919e+06	2.35723e+06	0.00709418	2.1491	1	2.17321e+06	21.0514
527	799.326	31.8679	365.416	6584.59	18317.1	4736.83	0.393723	0.404809	3476	11528	1.72964
528	548.134	36.6721	20102.4	22240.2	4524.78	5110.8	0.00456194	2.34085	21172.3	4818.79	-2.13544
529	891.358	37.2841	0	0	3.58867e+06	4.21515e+06	0.00638304	2.19497	1	3.90191e+06	21.8957
530	467.153	34.5025	23908.8	39009.9	365096	353998	0.0008147	3.089	31460.4	359548	3.51458
531	322.097	19.747	457491	384092	219932	163353	0.0385421	1.41406	420792	191644	-1.13468
532	373.256	47.6826	55140.6	33486.9	75663.5	80337.6	0.0932362	1.03042	44314.7	78001.5	0.815716
533	1925.17	34.4863	0	0	30049.3	18558.1	0.0516012	1.28734	1	24304.7	14.5689
534	1157.52	39.2341	108579	66919.6	398.627	0	0.052215	1.2822	87750.1	200.313	-8.775
535	977.33	34.3811	0	0	18164.2	16766.3	0.00159783	2.79647	1	17466.3	14.0923
536	517.108	36.4794	0	1346.83	205318	242296	0.00680509	2.16717	674.414	223808	8.37441
537	428.173	37.2927	198372	132695	6.34599e+06	7.06419e+06	0.00302681	2.51901	165535	6.70509e+06	5.34005
538	546.107	37.2677	0	2212.99	23177	48160.8	0.110298	0.957432	1107.5	35669.9	5.00933
539	879.297	34.4403	13080.6	24230.4	81842.5	43593.5	0.157485	0.802762	18656.5	62719	1.74922
540	308.128	19.744	179242	110070	75890.5	48795.4	0.157031	0.804013	144657	62344	-1.21431
541	1297.58	48.5504	4910.14	6848.93	9461.5	8884.15	0.0827839	1.08205	5880.54	9173.82	0.641575
542	323.936	63.5928	201072	161942	154554	145449	0.257325	0.589517	181508	150002	-0.275047
543	742.299	36.452	29265.8	5086.14	43457.6	59784.6	0.142104	0.847393	17177	51622.1	1.58752
544	327.141	47.8808	46686.2	21391	57502.5	80106.2	0.176907	0.752254	34039.6	68805.3	1.01531
545	884.254	59.1419	1.87961e+06	1.5185e+06	988559	1.0762e+06	0.0696514	1.15707	1.69906e+06	1.03238e+06	-0.718758
546	117.054	4.02734	53185	34068.5	35793.3	24684.7	0.349569	0.456467	43627.7	30240	-0.528785
547	826.307	36.5278	0	965.314	34835.9	36300.1	0.000624076	3.20476	483.657	35569	6.20049
548	1080.45	41.0253	17348.7	7718.57	0	453.428	0.125236	0.90227	12534.6	227.714	-5.78255
549	602.447	50.3928	546496	139231	184913	185860	0.520217	0.283815	342865	185388	-0.887094
550	330.145	21.3642	62654.2	54219.8	19149.8	9927.51	0.0196667	1.70627	58438	14539.6	-2.00692
551	429.176	37.2902	52314.6	35915.4	1.7008e+06	1.8893e+06	0.00290656	2.53662	44116	1.79505e+06	5.34658
552	337.106	44.2662	40295.1	130344	451700	415244	0.0189152	1.72319	85320.5	433473	2.34498
553	969.495	47.6642	157752	78214.8	123168	91316.5	0.825429	0.0833203	117985	107243	-0.137708
554	315.171	32.6029	20538.5	18901.7	16067.9	54224.2	0.503999	0.29757	19721.1	35147.1	0.833665
555	883.253	59.1392	2.21899e+06	1.77599e+06	1.16559e+06	1.27195e+06	0.0759492	1.11948	1.99749e+06	1.21877e+06	-0.712762
556	589.357	49.004	127022	110253	181277	180120	0.0178488	1.74839	118638	180699	0.60702
557	951.491	48.6575	32108.6	66944.4	2440.72	1670	0.112429	0.949123	49527.5	2056.36	-4.59006
558	603.45	50.4226	188621	47652.2	58687.7	58771.6	0.488048	0.311538	118137	58730.7	-1.00828
559	426.927	64.0476	24682.5	22089.2	28215.4	29596.3	0.0640855	1.19324	23386.8	28906.9	0.305716
560	136.075	16.8267	58523.8	34907.7	315400	224792	0.041229	1.3848	46716.8	270097	2.53147
561	987.337	34.3968	0	0	14619.5	5277	0.166945	0.777425	1	9949.26	13.2804
562	526.318	48.5541	72860.6	68703.2	102742	89274.3	0.0699556	1.15518	70782.9	96009.1	0.43977
563	574.291	47.9326	1872.49	1557.97	7049.44	8263.15	0.0109518	1.96051	1716.23	7657.3	2.15759
564	752.379	50.0784	16640.7	20656	23805.2	14702.5	0.914245	0.0389374	18649.3	19254.9	0.0460977
565	592.262	19.7475	102288	94029.5	12540.1	5312.91	0.00375988	2.42483	98159.6	8927.5	-3.4588
566	596.192	46.3054	94340.6	81560.3	4089.59	1491.84	0.00581218	2.23566	87951.4	2791.71	-4.97748
567	470.17	37.2721	85003.5	80386	202504	229171	0.0101721	1.99259	82695.8	215839	1.38407
568	884.319	37.4264	63390.6	87240.5	45222.7	42800.4	0.120647	0.918484	75316.6	44012.5	-0.775053
569	729.284	49.0059	4918.26	7754.97	37354	39618.3	0.00317139	2.49875	6337.62	38487.2	2.60236
570	778.179	34.4064	0	0	4978.85	3176.62	0.0455252	1.34175	1	4078.73	11.9939
571	374.036	19.7548	0	10844.6	29184.5	27780.5	0.05188	1.285	5423.29	28483.5	2.39288
572	448.189	37.2902	37687.7	21197.5	968879	1.07221e+06	0.0027749	2.55675	29443.6	1.02054e+06	5.11524
573	289.178	48.4883	432449	12760.9	88732	95663.1	0.597744	0.223485	222606	92198.5	-1.27168
574	968.457	38.2841	217044	190158	4845.83	0	0.00457839	2.33929	203602	2423.92	-6.39227
575	447.186	37.2903	189519	123806	6.18486e+06	6.91429e+06	0.00326503	2.48611	156663	6.54958e+06	5.38566
576	603.212	46.3029	14285.6	24948.9	2191.33	1794.83	0.0807063	1.09309	19618.2	1994.08	-3.2984
577	1156.52	39.2287	364958	204614	214.82	0	0.0709715	1.14892	284787	108.41	-11.3592
578	164.07	16.8267	59727.1	56549.5	1.15625e+06	836796	0.027774	1.55636	58139.3	996523	4.09932
579	959.271	60.1992	1.26235e+06	1.15544e+06	776341	784186	0.0152775	1.81595	1.2089e+06	780265	-0.631657
580	960.271	60.1988	728039	679384	460691	459039	0.00981815	2.00797	703712	459866	-0.613772
581	337.236	49.2082	727236	531969	145095	47409.8	0.0394347	1.40412	629604	96253.5	-2.70953
582	84.0099	63.3957	44668.5	31433.1	30070	27434.6	0.302113	0.519831	38051.8	28753.3	-0.404236
583	706.312	36.3527	25910.5	11132.4	65178	74440.8	0.0277143	1.5573	18522.5	69810.4	1.91417
584	120.081	22.7994	9614.56	8604.43	85474.3	61816.9	0.0320468	1.49422	9110.5	73646.6	3.01502
585	298.288	54.5631	118950	41897.2	60768.1	49765.6	0.584284	0.233376	80424.5	55267.8	-0.541194
586	451.247	52.9505	105547	107931	68852	54266.4	0.0257235	1.58967	106740	61560.2	-0.794035
587	306.122	19.7516	8.20344e+06	7.41659e+06	2.94344e+06	1.93732e+06	0.0138521	1.85848	7.81001e+06	2.44038e+06	-1.67822
588	586.339	48.5576	1.60116e+06	1.57523e+06	2.76158e+06	2.42922e+06	0.0263117	1.57985	1.5882e+06	2.5954e+06	0.708566
589	1026.39	34.0746	294.353	0	248.795	0	0.916707	0.0377695	148.176	125.398	-0.240806
590	871.39	44.5211	35335.5	74338.9	1444.14	242.029	0.109536	0.960442	54838.2	844.086	-6.02165
591	478.391	55.8384	134913	180057	197538	169545	0.430012	0.366519	157486	183543	0.22089
592	540.17	35.5463	271328	255212	306303	225233	0.9573	0.0189518	263271	265769	0.0136239
593	227.955	62.5274	47318.7	27951.6	26914	25197.1	0.355798	0.448797	37636.1	26056.5	-0.530474
594	310.238	39.3612	127079	98240.8	53073.3	44534.9	0.0512339	1.29044	112661	48805.1	-1.20688
595	1154.51	39.2341	1.12662e+06	616288	248.138	0	0.0760997	1.11862	871458	125.069	-12.7665
596	769.369	36.4735	216643	203632	2596.57	272.971	0.00100115	2.9995	210138	1435.77	-7.19337
597	242.173	16.376	12908.2	9060.63	80913	47816.9	0.0851445	1.06984	10985.4	64366	2.55071
598	184.043	12.4	9631.64	11592.3	38727.3	60839.4	0.0717555	1.14414	10613	49784.4	2.22986
599	1155.52	39.2352	888154	494632	461.534	0	0.0723574	1.14052	691394	231.767	-11.5426
600	1025.39	34.0917	0	0	1235.74	686.675	0.0727816	1.13798	1	962.209	9.91021
601	248.024	19.2354	3875.26	5153.61	4319.98	5169.21	0.792526	0.100986	4515.43	4745.59	0.0717245
602	1018.29	37.4485	0	0	10309.1	11544.3	0.00317912	2.49769	1	10927.7	13.4157
603	1028.44	47.6193	22339.1	6358.91	63734.6	48412	0.0637318	1.19564	14350	56074.3	1.96629
604	962.269	60.196	174372	162491	107753	102684	0.010278	1.98809	168433	105219	-0.678776
605	957.271	60.1988	1.52712e+06	1.37801e+06	928818	946543	0.0206074	1.68598	1.45257e+06	937681	-0.631434
606	715.841	47.6824	73740.7	35558.3	56059.8	58128.4	0.909956	0.0409794	54650.5	57095.1	0.0631319
607	908.259	60.1992	143337	117654	73735.3	70990.9	0.0459767	1.33746	130496	72364.1	-0.850664
608	501.136	32.8179	3967.12	3404.24	5448.22	7222.2	0.104394	0.981325	3686.68	6336.21	0.781298
609	958.272	60.1992	1.40701e+06	1.28276e+06	865476	883164	0.01732	1.76145	1.34489e+06	874321	-0.62125
610	265.18	44.8864	1.49038e+06	81645.5	197732	236294	0.504142	0.297447	786014	217014	-1.85677
611	263.997	19.2334	16562.4	10431.7	14698.7	11430.2	0.912283	0.0398704	13498.1	13065.5	-0.0469931
612	391.931	64.0677	32703.9	27763.8	28767.9	29108.4	0.652948	0.185121	30234.9	28939.2	-0.0631909
613	87.0453	2.84597	59523.8	40945.7	24035.6	13198.7	0.0988314	1.0051	50235.8	18618.2	-1.432
614	320.307	40.5822	175631	69626.9	115780	64697	0.637238	0.195698	122630	90239.6	-0.442475
615	1123.57	36.2696	0	0	0	0	#DIV/0!	#DIV/0!	1	1	0
616	1077.44	41.0252	217868	104868	0	228.334	0.10397	0.983091	161369	115.167	-10.4524
617	715.339	32.2281	18537.3	11910.7	289.719	0	0.0451234	1.3456	15225	145.86	-6.70572
618	275.08	2.46832	64277.8	44010.6	19874.5	21560	0.0814006	1.08937	54145.2	20718.2	-1.38593
619	216.034	20.7464	2320.8	5440.7	3529.18	2551.37	0.658336	0.181553	3881.75	3041.27	-0.352031
620	1079.45	41.024	54900	27341.8	0	296.843	0.0969432	1.01348	41121.9	149.422	-8.10437
621	408.143	35.6771	130961	120057	76860.5	71660.1	0.0136092	1.86617	125510	74261.3	-0.757121
622	712.209	19.7585	0	10425	0	0	0.42265	0.374019	5213.51	1	-12.348
623	588.345	48.5613	145684	133250	228472	207355	0.0235379	1.62823	139468	217914	0.643828
624	1122.57	36.2727	0	0	0	0	#DIV/0!	#DIV/0!	1	1	0
625	1078.45	41.0252	141201	70163.6	0	473.314	0.0972056	1.01231	105683	237.657	-8.79665
626	843.36	35.5322	222527	190640	119774	38803.8	0.0996733	1.00142	206585	79289.7	-1.38153
627	307.189	41.3406	107550	86201.7	73864.1	75332.6	0.17277	0.762532	96876.6	74599.3	-0.376986
628	693.39	45.8375	59056.3	49636.4	20980.1	17027.6	0.0202541	1.69349	54347.4	19004.8	-1.51584
629	986.401	34.3405	0	0	30405	12251.2	0.143213	0.844018	1	21329.1	14.3805
630	587.342	48.5576	592871	575673	1.00655e+06	896938	0.0220411	1.65677	584273	951745	0.703933
631	262.108	24.9001	344157	298286	66513.7	34127.6	0.0105709	1.97589	321223	50321.7	-2.67432
632	307.125	19.7475	1.44819e+06	1.31872e+06	532561	353792	0.0134984	1.86972	1.38345e+06	443178	-1.64232
633	864.626	53.6698	51705.9	24705.5	31966.3	23371.2	0.534545	0.272016	38206.7	27669.7	-0.465517
634	816.4	35.555	0	0	0	0	#DIV/0!	#DIV/0!	1	1	0
635	854.394	48.8918	182216	89991.4	14759.7	14293.3	0.118771	0.925291	136105	14527.5	-3.22786
636	446.184	37.2967	664104	434353	2.29793e+07	2.54358e+07	0.00270773	2.56739	549230	2.42076e+07	5.46191
637	1295.57	48.5547	8086.75	16532.5	28415.1	22199.3	0.13141	0.881373	12310.6	25308.2	1.0397
638	238.108	24.2298	397772	262289	78517.8	48491.3	0.0615791	1.21057	330031	63505.6	-2.37765
639	320.976	64.0635	22541.5	19086.1	19587.6	20817.2	0.770541	0.113204	20814.8	20203.4	-0.0430115
640	949.942	47.6897	47185.5	27041.1	0	0	0.0664011	1.17782	37114.3	1	-15.1797
641	426.157	38.4125	213037	99302.1	771108	863731	0.0120786	1.91798	156170	817421	2.38796
642	368.093	19.7515	54683.7	74536.3	38163.8	32109	0.104839	0.979478	64611	35137.4	-0.878773
643	872.394	44.5233	21553.5	44617.7	1573.08	219.799	0.108274	0.965477	33086.6	897.44	-5.20429
644	1217.56	48.556	7985.74	11104.5	13894.9	10000.3	0.437145	0.359374	9546.14	11948.6	0.323855
645	835.24	59.1375	175593	118813	80852.6	88378.5	0.160448	0.794666	147204	84616.6	-0.798803
646	333.3	54.0331	116623	75473.3	86001.5	87092.3	0.689694	0.161343	96049.2	86547.9	-0.150274
647	241.17	16.2847	81343.5	53373.8	397358	243524	0.0836254	1.07766	67359.7	320442	2.25011
648	425.367	53.8106	243141	168964	189136	198055	0.770494	0.113231	206053	193596	-0.0899671
649	985.398	34.3572	0	0	49485.9	19152.8	0.151992	0.818179	1	34320.4	15.0668
650	239.111	26.1931	395622	292969	90916.2	42336.4	0.0393683	1.40485	344296	66627.3	-2.36947
651	289.178	45.6737	178349	167665	632186	887974	0.0443993	1.35262	173008	760081	2.13531
652	403.141	31.9089	39948.6	45720.7	689635	476777	0.0366965	1.43538	42835.7	583207	3.76712
653	693.31	49.967	21805.9	12276.1	10145.3	16320.7	0.571508	0.242978	17042	13234	-0.364844
654	853.391	48.8954	331714	164602	20426.4	22806.3	0.113388	0.945434	248159	21617.4	-3.521
655	753.338	36.8646	102257	51195.4	673.424	443.597	0.0963863	1.01598	76727.3	559.511	-7.09943
656	395.22	49.2825	23339.2	17905.3	51799.6	41827.5	0.0439279	1.35726	20623.3	46814.6	1.18268
657	379.175	30.3433	159282	113322	106864	71954.5	0.245672	0.609645	136303	89410.4	-0.608304
658	280.118	23.835	618666	485555	124564	71345.5	0.0240152	1.61951	552111	97955.5	-2.49476
659	795.976	64.0865	143175	128226	122447	117171	0.182835	0.737941	135702	119810	-0.179693
660	514.396	50.2475	567114	151335	224658	221738	0.580102	0.236496	359225	223199	-0.686556
661	1108.51	36.2727	0	0	0	0	#DIV/0!	#DIV/0!	1	1	0
662	452.052	19.7475	5216.11	33490.7	47276.8	40922.6	0.22979	0.638668	19354.4	44100.7	1.18814
663	793.328	39.246	53052.6	36786.2	202.59	417.745	0.0316756	1.49927	44920.4	311.168	-7.17353
664	531.19	55.1552	0	12048.9	12335.8	20575.2	0.289169	0.538848	6025.45	16456.5	1.44952
665	534.137	34.5107	0	5344.18	54369.6	69583	0.0179851	1.74509	2673.09	61977.3	4.53516
666	1004.39	42.1694	850.001	847.515	78917.3	60817.8	0.0167615	1.77569	849.758	69868.6	6.36145
667	500.134	32.8275	1734.69	1716.33	13983.9	18795.4	0.0258758	1.58711	1726.51	16390.7	3.24694
668	652.367	36.2238	92732.4	80289.9	63578	51739.7	0.0783172	1.10614	86512.2	57659.9	-0.585335
669	761.221	58.1616	394888	226546	143243	193788	0.247056	0.607205	310718	168517	-0.882714
670	528.121	34.4996	2340.57	5546.1	28989	35045.3	0.0145693	1.83656	3944.34	32018.1	3.02103
671	1128.52	36.2665	0	0	14056.3	0	0.42265	0.374019	1	7029.15	12.7791
672	908.431	39.1596	33373.6	30751.2	2726.61	1645.13	0.00224611	2.64857	32063.4	2186.87	-3.87399
673	844.362	35.5308	116851	95119.4	58186.4	12616.9	0.107642	0.96802	105986	35402.7	-1.58194
674	1216.52	46.5754	18703.9	19577.2	33570.9	30624.6	0.0137722	1.861	19141.5	32098.8	0.745812
675	212.018	63.3908	28180.4	22572.6	22192.1	20053.1	0.292073	0.534508	25377.5	21123.6	-0.264693
676	558.422	50.3256	587191	143067	213666	214668	0.566752	0.246607	365130	214168	-0.76967
677	666.975	64.0865	63397.6	50919.6	53667.7	47985.1	0.45317	0.343739	57159.6	50827.4	-0.16939
678	1296.57	48.5535	5842.6	12540.5	20621.6	16246.4	0.147082	0.832439	9192.53	18435	1.00391
679	947.274	28.2918	106406	91546.2	56087	47515.3	0.0315052	1.50162	98977.2	51802.1	-0.934084
680	182.063	19.7661	80400.5	62892.6	11976.5	20045.2	0.0287283	1.54169	71647.6	16011.8	-2.16178
681	834.241	59.1385	335742	230926	158944	174571	0.158799	0.799153	283335	166758	-0.764752
682	760.222	58.1604	819935	474645	297481	390262	0.231741	0.634998	647291	343873	-0.912539
683	109.065	26.1962	595592	445504	126747	58448.3	0.0351713	1.45381	520549	92598.7	-2.49097
684	998.517	48.0426	231670	117431	51822.8	29792.9	0.14824	0.829034	174551	40808.9	-2.0967
685	290.181	45.665	33467.2	28551.4	122773	165689	0.0345167	1.46197	31010.3	144232	2.21757
686	491.4	50.1877	9514.51	8240.41	7538.85	5700.89	0.180948	0.742447	8878.46	6620.87	-0.423288
687	762.22	58.1588	188227	108552	71181.6	93610.9	0.251849	0.598861	148390	82397.2	-0.848727
688	575.291	47.9264	2485.53	2999.39	10521.3	11619.7	0.00525876	2.27912	2743.46	11071.5	2.01279
689	305.022	19.237	7306.07	8452.37	9226.83	9517.39	0.127535	0.894369	7880.22	9373.11	0.250293
690	307.955	63.4742	43967	32862.5	27721.1	22630.1	0.162498	0.789151	38415.8	25176.6	-0.609615
691	498.365	51.7938	116364	114420	934217	651556	0.0408698	1.3886	115393	792888	2.78056
692	964.439	47.6883	44755.7	13632.1	39672.5	35110.3	0.654193	0.184294	29194.9	37392.4	0.357029
693	811.956	64.0406	19670	18459.6	19216.5	22829.2	0.412097	0.385	19065.8	21023.8	0.14104
694	386.216	37.9848	143091	90417.9	49419.9	55067.7	0.135219	0.868963	116756	52244.8	-1.16013
695	467.152	38.4319	1094.43	59146.6	148327	191808	0.0610647	1.21421	30121.5	170069	2.49725
696	896.346	31.0784	21303	17537.6	0	252.268	0.00942923	2.02552	19421.3	127.134	-7.25514
697	260.09	25.8655	702150	653210	155736	119258	0.00317691	2.498	677681	137498	-2.30119
698	1128.38	34.4865	0	0	0	0	#DIV/0!	#DIV/0!	1	1	0
699	717.556	54.3484	204367	123604	139449	143828	0.636052	0.196507	163987	141639	-0.211356
700	800.936	64.0476	23840.8	20416.3	21527.4	19287.5	0.488766	0.310899	22129.6	20408.4	-0.116812
701	694.319	49.9755	15704.5	9481	8577.31	9060.18	0.350136	0.455763	12593.7	8819.74	-0.513897
702	458.167	28.6048	14761.9	12055.7	8261.97	4540.45	0.0929989	1.03152	13409.8	6402.21	-1.06665
703	976.387	42.3938	1720.44	3145.79	936.725	2206.25	0.46191	0.335443	2434.12	1572.49	-0.630348
704	833.242	59.139	399320	268246	187509	204510	0.172441	0.763358	333784	196011	-0.767984
705	233.147	62.6435	551331	411791	295485	250956	0.104546	0.980691	481562	273222	-0.817651
706	651.366	36.2258	189904	170417	118336	90115.7	0.0473965	1.32425	180161	104227	-0.789566
707	406.293	47.2127	23703.3	12541.2	28270.2	23094.9	0.344063	0.463362	18123.2	25683.5	0.503002
708	537.207	19.9355	1213.01	768.682	0	228.253	0.0724498	1.13996	991.846	115.127	-3.1069
709	730.361	36.2702	0	0	0	0	#DIV/0!	#DIV/0!	1	1	0
710	404.144	31.9082	1046.41	5726.81	179985	121830	0.0369496	1.43239	3387.61	150908	5.47726
711	940.459	47.6885	3.55705e+07	3.16966e+07	1.57841e+07	1.11657e+07	0.0216314	1.66492	3.36336e+07	1.34749e+07	-1.31963
712	320.289	53.8916	48034.8	31462.7	35605.6	43549.3	0.986819	0.00576262	39749.8	39578.5	-0.00623085
713	377.233	49.0238	49496.3	20690	73243.5	66646.3	0.142349	0.846644	35094.2	69945.9	0.995008
714	95.0493	18.7558	88425.5	71129.9	23614.6	10341.3	0.0288339	1.5401	79778.7	16978.9	-2.23226
715	549.245	22.9275	119254	109330	51301.2	32010.8	0.0215797	1.66595	114293	41657	-1.45611
716	319.304	40.5822	1.34469e+06	523218	885215	476135	0.636399	0.196271	933956	680676	-0.456387
717	1003.39	42.18	932.805	2200.19	132181	99412.7	0.0199871	1.69925	1567.5	115798	6.207
718	759.224	58.1618	1.00296e+06	575563	361540	484428	0.241264	0.617507	789265	422985	-0.899904
719	313.238	47.6986	228127	409169	104373	89240.3	0.134622	0.870885	318649	96807.8	-1.71877
720	541.127	56.0806	4802.68	10680.2	9307.2	15266.3	0.390906	0.407928	7742.43	12287.8	0.666363
721	646.475	50.4687	477473	110350	146686	153077	0.514901	0.288276	293912	149883	-0.971554
722	518.111	36.4907	0	416.948	55450.1	66816.8	0.00860139	2.06543	209.474	61134.5	8.18907
723	1014.5	48.5938	11794.5	74760.1	15996.2	9571.26	0.436927	0.359591	43278.3	12784.7	-1.75922
724	784.352	36.7652	243080	130056	56663.7	24632.7	0.130949	0.882898	186569	40649.2	-2.19841
725	633.336	51.7946	3374.35	7064.94	46094.6	28980.8	0.0661654	1.17937	5220.64	37538.7	2.84608
726	537.963	64.0865	54275.8	50458.9	50108.3	49342.6	0.307569	0.512057	52368.4	49726.5	-0.0746818
727	683.314	33.0986	6140.51	4321.13	1737.24	0	0.0740256	1.13062	5231.82	869.621	-2.58886
728	699.304	48.5364	16016	16263.1	29939.5	23398.6	0.0845381	1.07295	16140.6	26670	0.724527
729	978.332	34.3816	0	598.293	11352.5	3820.34	0.193532	0.713247	300.147	7587.4	4.65987
730	832.241	59.139	482320	330120	234054	252401	0.167337	0.776409	406221	243229	-0.739951
731	318.301	40.545	7.03096e+06	2.6456e+06	4.66218e+06	2.43365e+06	0.65219	0.185626	4.83828e+06	3.54791e+06	-0.447523
732	690.501	50.5284	394420	93794.3	119557	119021	0.493661	0.306571	244108	119290	-1.03305
733	778.342	39.2255	1.74439e+06	1.00905e+06	2060.54	1434.74	0.0646476	1.18945	1.37672e+06	1748.64	-9.62079
734	441.228	47.9131	5.27333e+06	3.03309e+06	2.42519e+06	1.68362e+06	0.217239	0.663062	4.15321e+06	2.05441e+06	-1.0155
735	375.146	33.3724	3311.67	5383.89	102313	98626.1	0.00048372	3.31541	4348.78	100471	4.53002
736	812.233	58.162	605315	386962	213753	260653	0.146251	0.834901	496140	237204	-1.06462
737	101.008	63.3992	45921.7	37254.1	43234.4	46876.5	0.537543	0.269587	41588.9	45056.4	0.115534
738	567.243	42.308	594677	401687	317402	205550	0.167826	0.775141	498183	261477	-0.929991
739	125.096	28.8563	939978	887102	445032	270392	0.0259005	1.58669	913541	357713	-1.35267
740	777.339	39.2309	3.52974e+06	1.99285e+06	2426.09	1828.93	0.0695691	1.15758	2.76129e+06	2128.51	-10.3413
741	1037.54	48.556	22851.8	10899.3	20447.4	13847.2	0.971862	0.0123952	16876.6	17148.3	0.0230469
742	808.295	40.6125	8576.91	4602.14	5979.27	4693.68	0.609487	0.215036	6590.52	5337.47	-0.304236
743	298.097	9.64115	30336	47157.9	13953.1	9133.75	0.0897363	1.04703	38748	11544.4	-1.74693
744	758.223	58.1618	1.34061e+06	768650	511598	651955	0.249542	0.602856	1.05463e+06	581777	-0.858199
745	505.175	54.9971	1346.48	11026.2	13921.4	19869	0.20006	0.698839	6187.32	16896.2	1.44931
746	734.527	50.5784	296459	63935.9	84815.5	89523.4	0.507635	0.294448	180198	87170.5	-1.04767
747	1034.29	61.4544	463866	483437	335020	321067	0.00674327	2.17113	473653	328044	-0.529938
748	600.47	53.7257	1.13973e+06	656416	772180	806554	0.69758	0.156406	898072	789368	-0.186133
749	1369.41	28.2911	186787	146373	34724	4140.84	0.0284002	1.54668	166581	19433.4	-3.09961
750	778.555	50.585	196668	40769.1	58774.4	59287.3	0.523867	0.280779	118720	59031.9	-1.00799
751	401.143	32.8591	80422.2	53526.9	51044.3	26602.8	0.261444	0.582621	66975.6	38824.6	-0.786664
752	649.432	43.4957	84563.8	64003	58061.9	60824	0.288804	0.539397	74284.4	59444	-0.321529
753	219.022	63.3909	1.02338e+06	690506	668720	648349	0.356197	0.44831	856946	658535	-0.379943
754	514.339	51.7926	3536	6076.6	40373.9	38946.4	0.00174316	2.75866	4807.3	39661.1	3.04443
755	221.018	63.3941	163612	111559	101239	101096	0.296665	0.527734	137587	101169	-0.443576
756	180.159	22.4759	104347	84636.5	109492	83514.7	0.913092	0.0394857	94492.9	96504.4	0.0303895
757	462.178	34.0346	11868.9	8577.25	133624	96198.1	0.0307225	1.51254	10224.1	114912	3.49049
758	291.194	48.9561	27273.7	6590.11	101775	134653	0.0348592	1.45768	16932.9	118215	2.80351
759	1032.29	61.455	785189	814064	570248	533878	0.00868255	2.06135	799627	552064	-0.534492
760	484.155	32.9544	77094.5	62259.2	238646	250276	0.00289521	2.53832	69677.8	244462	1.81084
761	519.114	25.9353	8973.08	654.7	0	637.408	0.393911	0.404602	4814.89	319.704	-3.91269
762	1049.31	37.2902	73908.6	2938.16	64646.1	100374	0.38268	0.417164	38424.4	82511	1.10256
763	779.345	39.2297	516521	322027	1798.48	711.073	0.05009	1.30025	419275	1255.77	-8.38318
764	444.167	38.4179	55071.7	26259.3	2.44513e+06	2.63883e+06	0.00152892	2.81561	40666.5	2.54198e+06	5.96597
765	980.479	48.9753	45550	20019.6	5308.28	1983.65	0.151915	0.818401	32785.8	3646.97	-3.1683
766	1130.52	36.2757	0	0	0	0	#DIV/0!	#DIV/0!	1	1	0
767	517.114	25.9395	9772.96	3511.83	428.823	639.743	0.190479	0.720154	6643.4	535.283	-3.63355
768	905.486	50.0902	12303.3	17188.6	15512.6	8444.63	0.585481	0.232487	14747	11979.6	-0.299837
769	702.335	31.1147	77837.9	69555.3	2911.21	931.54	0.00350084	2.45583	73697.6	1922.37	-5.26066
770	1035.29	61.4544	265711	275784	197482	180298	0.0144818	1.83918	270748	188891	-0.519397
771	445.17	38.4079	2967.93	1710.25	679888	739881	0.00179334	2.74634	2340.09	709886	8.24488
772	444.229	48.9377	102448	57710.9	13578.8	8704.77	0.0920584	1.03594	80080.3	11142.8	-2.84533
773	462.178	31.0883	20900.3	9901.39	116791	118358	0.00294283	2.53124	15401.9	117576	2.93241
774	165.091	28.8554	400044	391534	200665	118496	0.029243	1.53398	395790	159582	-1.31044
775	557.446	53.731	406444	246512	284348	296670	0.697714	0.156323	326479	290510	-0.168404
776	400.14	32.8603	349415	207038	192967	103995	0.262233	0.581313	278227	148482	-0.905976
777	611.918	54.2298	23100.5	15545.6	17127.5	19793.8	0.849506	0.0708335	19324	18461.6	-0.0658645
778	373.101	53.8224	47942.4	6024.63	5544.09	6438.3	0.422124	0.37456	26984.5	5992.2	-2.17097
779	1041.5	48.012	423974	655732	0	0	0.0431163	1.36536	539854	1	-19.0422
780	590.122	29.6259	157687	171939	58204.3	34277.5	0.0135128	1.86926	164814	46241.9	-1.83356
781	813.231	58.1592	291820	184598	102255	122992	0.148157	0.829277	238210	112625	-1.08071
782	356.127	50.5091	14670.8	23545.7	46238	42134.4	0.0359667	1.4441	19109.2	44187.2	1.20936
783	1033.29	61.4546	736442	783542	545566	505083	0.0170642	1.76791	759993	525325	-0.532775
784	820.6	53.6824	103385	57800.7	72255.1	66108.7	0.668946	0.174609	80593.6	69182.9	-0.220251
785	235	63.5771	604133	456915	415807	398610	0.238025	0.623377	530525	407210	-0.38165
786	462.265	47.8489	455801	302180	574024	446881	0.318077	0.497468	378992	510453	0.429613
787	512.418	53.702	1.46144e+06	895653	1.09261e+06	1.00148e+06	0.691333	0.160313	1.17855e+06	1.04705e+06	-0.170686
788	169.049	19.2334	74416.5	49505.2	61095.3	49079	0.668418	0.174952	61961.9	55088.2	-0.169638
789	236.129	42.5024	1.84333e+06	1.08381e+06	160977	84660.7	0.0723527	1.14055	1.46357e+06	122820	-3.57488
790	645.499	53.7195	348083	207740	255027	267549	0.835426	0.0780918	277913	261289	-0.0889839
791	424.14	41.7268	54588.1	40771.4	17342.2	14563.6	0.0459564	1.33765	47680.8	15953.9	-1.5795
792	218.087	63.3941	392898	321531	381647	432628	0.372946	0.428354	357216	407138	0.188723
793	1368.41	28.295	240457	196256	44631.5	15384.2	0.0192275	1.71608	218357	30008.8	-2.86323
794	424.365	53.8136	868790	562459	664622	733050	0.924572	0.0340591	715626	698837	-0.0342494
795	507.128	25.9438	20424.4	4431.15	0	530.699	0.267852	0.572106	12428.8	266.35	-5.54422
796	1027.45	42.7635	48652.4	55542.8	209.141	201.894	0.00437892	2.35863	52098.6	206.517	-7.97884
797	811.233	58.1618	1.21627e+06	749102	430723	524067	0.167954	0.77481	982685	477396	-1.04154
798	512.107	29.3009	184179	133976	43961.2	25037.5	0.0433741	1.36277	159078	34500.4	-2.20505
799	601.473	53.7257	404063	230273	275664	284413	0.711109	0.148064	317169	280039	-0.179621
800	189.164	48.9115	252789	163080	25787	17874.6	0.0538554	1.26877	207935	21831.8	-3.25163
801	810.235	58.1604	1.4828e+06	925366	526600	640705	0.160976	0.79324	1.20408e+06	583654	-1.04475
802	1031.29	61.4591	779079	814020	580289	537740	0.0131665	1.88053	796551	559015	-0.510878
803	974.812	62.503	60931.2	53869.1	69287.6	73122.1	0.0752757	1.12335	57401.2	71205.9	0.310917
804	497.361	51.7955	181735	320231	2.89904e+06	2.03905e+06	0.0364608	1.43817	250984	2.46904e+06	3.29829
805	1107.42	46.3052	49883.5	44433.4	647.179	210.267	0.00340499	2.46788	47159.5	429.723	-6.778
806	768.421	47.9728	38097.2	101302	567.252	633.767	0.160326	0.794995	69700.5	601.51	-6.85644
807	719.263	42.033	12074.9	11559	3530.43	5500.95	0.0189079	1.72336	11818	4516.69	-1.38764
808	1129.52	36.2702	0	0	2449	0	0.42265	0.374019	1	1225.5	10.2592
809	518.114	25.9346	17620.6	3694.91	258.39	221.243	0.273259	0.563425	10658.8	240.816	-5.46796
810	336.311	53.8876	533788	365641	417086	466932	0.93798	0.0278062	449716	442010	-0.0249353
811	939.232	28.292	459628	255858	75539.1	69235.2	0.10743	0.968873	357744	72388.2	-2.3051
812	797.98	64.0802	46549.3	39580	42542.2	37225.6	0.543434	0.264853	43065.6	39884.9	-0.110696
813	270.139	34.1778	11841.1	28352.8	3241.13	4490.32	0.188997	0.723545	20097.9	3866.72	-2.37786
814	216.147	28.8543	138915	141598	69281.2	43848.7	0.0225564	1.64673	140258	56566	-1.31008
815	530.136	37.2677	1276.71	2354.66	90993.8	102910	0.00393113	2.40548	1816.69	96953	5.7379
816	363.312	53.8916	448212	266192	319814	359265	0.867074	0.0619437	357203	339540	-0.0731607
817	270.207	27.2221	241344	193146	265789	149503	0.892782	0.0492544	217246	207647	-0.0651949
818	978.468	48.9377	48448.7	32728.1	1214.22	1202.06	0.037607	1.42473	40589.4	1209.14	-5.06905
819	633.305	36.5238	14181.6	12047	41077	47232.3	0.0108344	1.9652	13115.3	44155.7	1.75135
820	348.039	63.4553	6258.47	7056.98	8140.78	9650.8	0.119978	0.920899	6658.73	8896.79	0.418039
821	220.025	1.95351	13830.4	24001	9825.72	10268.3	0.223572	0.650583	18916.7	10048	-0.912749
822	809.234	58.1618	1.93074e+06	1.18965e+06	674940	828334	0.1661	0.779631	1.5602e+06	751638	-1.05362
823	926.328	19.7476	34873.4	56156.7	0	370.41	0.0509526	1.29283	45516	186.205	-7.93334
824	497.194	48.1295	144353	80147.9	102909	75549.1	0.577245	0.23864	112252	89230.1	-0.331134
825	411.235	49.257	1.40347e+06	450990	788589	471767	0.613938	0.211876	927231	630179	-0.557166
826	730.291	48.9914	54409	59950.3	18859.3	17421.9	0.00533286	2.27304	57180.6	18141.6	-1.65623
827	314.146	38.5068	232572	88536.1	25343.1	14175	0.190603	0.719871	160555	19760.1	-3.02241
828	381.341	53.8887	358412	213423	256423	283089	0.846796	0.0722211	285918	269757	-0.0839415
829	337.153	32.6036	43287.8	31433.9	25837	39710.6	0.665046	0.177149	37361.8	32774.8	-0.188977
830	380.338	53.8916	1.64557e+06	937704	1.13874e+06	1.25883e+06	0.820086	0.0861407	1.29164e+06	1.19878e+06	-0.107632
831	477.248	45.4002	597384	222545	160915	172289	0.323841	0.489668	409965	166603	-1.29909
832	484.138	37.2807	32328.8	28731.6	128809	174841	0.0343691	1.46383	30531.2	151826	2.31406
833	628.5	54.3761	952413	574262	650822	672062	0.644399	0.190845	763339	661443	-0.206706
834	319.285	53.8876	237056	162949	185307	207944	0.938478	0.027576	200004	196627	-0.0245698
835	248.129	23.7307	107343	75264.6	29162.2	22721.9	0.0573129	1.24175	91305	25943.1	-1.81534
836	794.285	36.3686	0	0	67865.9	47429.6	0.0300111	1.52272	1	57648.7	15.815
837	556.443	53.7269	1.25166e+06	740877	860826	906110	0.702952	0.153075	996268	883469	-0.173354
838	748.543	52.0057	618364	166395	203538	210081	0.497901	0.302857	392381	206811	-0.923943
839	1215.52	46.5825	24265.5	27147.3	44257.7	42483.6	0.00905106	2.0433	25707.4	43371.6	0.754568
840	793.572	52.0243	187327	49527.5	59864	57692.7	0.477942	0.320625	118428	58779.3	-1.01063
841	795.287	36.3549	14395	9218.77	31489.1	16205.5	0.274151	0.56201	11807.9	23848.3	1.01413
842	1137.25	25.9469	18880.2	5069.02	0	208.289	0.227796	0.642454	11975.6	105.144	-6.83158
843	893.549	38.5381	28261	20628.8	296.171	0	0.023826	1.62295	24445.9	149.086	-7.35731
844	948.941	47.6887	137647	102102	50570.3	35259.2	0.0577962	1.2381	119875	42915.8	-1.48196
845	1030.54	49.0707	130802	97458.3	10303.7	5915.72	0.0242446	1.61538	114131	8110.73	-3.81471
846	1028.45	42.761	32250.5	37243.7	0	0	0.00512295	2.29048	34748.1	1	-15.0846
847	520.938	64.0676	28102.7	23559.6	24165.2	23724.7	0.495433	0.305015	25832.1	23945.9	-0.109387
848	430.178	37.295	4807.5	7102.06	276818	310403	0.00340633	2.46771	5955.78	293611	5.62347
849	1022.28	28.2879	318514	271989	404956	368161	0.0912894	1.03958	295252	386560	0.388743
850	561.521	61.5473	139321	106439	92476.7	75674.3	0.170334	0.768698	122881	84076.5	-0.547493
851	1014.47	44.4533	230841	417927	193.636	217.563	0.0741247	1.13004	324385	206.599	-10.6167
852	273.147	31.5763	3.34825e+06	2.60033e+06	379282	309883	0.0197931	1.70349	2.97429e+06	344583	-3.10962
853	936.503	48.0767	987778	246556	239528	101540	0.357816	0.44634	617168	170535	-1.85559
854	937.505	48.0688	273149	69534.9	66097.3	29720.3	0.35504	0.449723	171343	47909.8	-1.83849
855	322.142	47.9287	1068.11	6722.73	38294.8	41464	0.00801522	2.09608	3896.42	39880.4	3.35546
856	834.616	54.0063	245808	120118	142238	128896	0.531495	0.274501	182964	135568	-0.432546
857	309.234	25.7777	61206.1	18685.4	153329	79341	0.215289	0.666977	39946.7	116336	1.54215
858	254.101	23.3325	16051.3	10074.3	99520.9	81487.7	0.0147142	1.83226	13063.8	90505.3	2.79243
859	836.239	59.1392	84900.2	57256.4	34127.1	36368.9	0.1228	0.910802	71079.3	35249	-1.01185
860	511.307	49.0182	299548	265197	418950	441874	0.018906	1.7234	282374	430413	0.608117
861	559.359	37.9064	252062	183181	127973	114993	0.111167	0.954024	217622	121484	-0.841059
862	1032.55	49.0798	31984	22835.2	4547.06	1683.39	0.0367916	1.43425	27410.6	3116.22	-3.13686
863	1013.46	44.455	356273	665837	264.136	0	0.0808083	1.09254	511056	133.068	-11.9071
864	1015.47	44.455	85579.4	155541	1673.49	0	0.0758304	1.12016	120561	837.743	-7.16904
865	214.253	41.0317	100460	45000.3	45490.8	49330.3	0.458501	0.338659	72731.1	47411.6	-0.617333
866	492.128	37.8216	80837.5	33263.7	32709.8	16199	0.324777	0.488414	57051.6	24455.4	-1.22211
867	644.496	53.7178	941037	533256	682234	694056	0.832531	0.0795997	737148	688146	-0.099238
868	816.294	32.9898	32754.9	27190.7	396.901	226.925	0.00869169	2.0609	29973.8	312.913	-6.5818
869	792.569	52.0217	410914	108694	134251	129262	0.486067	0.313304	259805	131757	-0.979547
870	395.355	54.0595	217876	137440	167494	168127	0.8294	0.0812358	177659	167811	-0.0822712
871	392.148	36.7216	27278.7	15089.9	19719.2	16900.4	0.690965	0.160544	21185.3	18310.8	-0.210369
872	716.553	54.3549	461752	293624	339673	346680	0.721441	0.141799	377689	343178	-0.138242
873	207.066	32.8639	94662.6	60896.4	57913	37097.7	0.266442	0.574397	77780.5	47506.3	-0.711289
874	1051.65	50.6961	8099.7	7581.42	591.912	407.509	0.00140097	2.85357	7841.56	500.711	-3.96909
875	325.11	32.8614	64952.1	49807.6	50001.8	29056.7	0.301275	0.521036	57380.8	39530.3	-0.537612
876	653.371	36.2218	2549.6	0	0	0	0.42265	0.374019	1275.8	1	-10.3172
877	522.211	25.0828	13419.3	12007	42200.5	18273.6	0.281186	0.551007	12714.2	30238	1.24993
878	315.154	35.5377	464725	320581	185296	100843	0.0961314	1.01713	392654	143070	-1.45654
879	147.043	64.0865	160449	121598	114597	102341	0.251099	0.600155	141024	108470	-0.378646
880	512.31	49.0161	116834	100670	148536	157112	0.0404943	1.39261	108753	152825	0.490823
881	815.291	33.0045	70424.7	55794.5	2080.5	281.711	0.0138697	1.85793	63110.6	1182.1	-5.73845
882	672.527	54.3648	705788	453804	508494	528856	0.676474	0.169749	579797	518676	-0.160714
883	560.518	61.5412	392550	297155	265449	217563	0.192436	0.715714	344853	241507	-0.51392
884	791.593	54.0162	209819	105320	131996	113630	0.579644	0.236839	157571	122814	-0.359528
885	513.421	53.6894	456950	314748	342851	315336	0.515287	0.28795	385850	329095	-0.229538
886	1031.54	49.0721	86547.6	65237	8855.14	4045.04	0.0238617	1.6223	75893.3	6451.09	-3.55636
887	310.916	2.1534	12993	63782.7	6450.54	12842	0.378159	0.422326	38388.8	9647.25	-1.9925
888	215.143	28.857	823805	760792	411621	252655	0.0328324	1.4837	792300	332139	-1.25426
889	808.264	36.5006	0	0	909.261	537.064	0.0602964	1.21971	1	724.162	9.50017
890	369.117	32.8611	386716	250637	236781	130062	0.258218	0.588014	318678	183422	-0.796928
891	535.14	34.5097	293.325	1626.06	11675.6	20923	0.0815563	1.08854	960.69	16300.3	4.08468
892	877.806	63.4238	91952.9	106927	18344	39768.9	0.0327941	1.4842	99440.9	29057.5	-1.77493
893	1212.6	35.5355	0	0	0	0	#DIV/0!	#DIV/0!	1	1	0
[truncated: 4,188 more rows]
